# Supplementary material for: An efficient method for generation of bi-allelic null mutant mouse embryonic stem cells and its application for investigating epigenetic modifiers
Source: Nucleic Acids Res. 2017 Sep 13;45(21):e174. doi: 10.1093/nar/gkx811 (PMC5716182; doi:10.1093/nar/gkx811)
Supplement: Supplementary Data [file gkx811_supp.zip]

Archive with 7 entries (7 files):
- Fisher_SUPPL_MandM_gkx811_040917.pdf
- nar-00912-met-g-2017-File006.pdf
- nar-00912-met-g-2017-File007.xls
- nar-00912-met-g-2017-File008.xls
- nar-00912-met-g-2017-File009.xls
- nar-00912-met-g-2017-File010.xls
- nar-00912-met-g-2017-File011.xls
