# Supplementary material for: An efficient method for generation of bi-allelic null mutant mouse embryonic stem cells and its application for investigating epigenetic modifiers
Source: Nucleic Acids Res. 2017 Sep 13;45(21):e174. doi: 10.1093/nar/gkx811 (PMC5716182; doi:10.1093/nar/gkx811)
Supplement: Supplementary Data [file gkx811_supp.zip › nar-00912-met-g-2017-File007.xls]

## Sheet: Summary
Supplementary Table S2a: Summary of IKMC Intermediate Vectors (IV) with or without internal PmeI restriction cut sites within their genomic homology arms. The presence of an additional internal PmeI site ("TRUE") in the IV precludes their use as a pI_hygGFP second allele targeting vector.
IKMC pipeline	Mutation type	Cassette type	PmeI cut?	Number of genes	Number of designs	Number of IV	Number of IKMC targeting vectors
EUCOMM	Conditional Ready	Promotor Driven	FALSE	7484	7720	9103	61146
EUCOMM	Conditional Ready	Promotor Driven	TRUE	78	78	132	705
EUCOMM	Conditional Ready	Promotorless	FALSE	1226	1254	1479	6359
EUCOMM	Conditional Ready	Promotorless	TRUE	151	153	166	631
KOMP-CSD	Conditional Ready	Promotor Driven	FALSE	5334	5578	7846	42257
KOMP-CSD	Conditional Ready	Promotor Driven	TRUE	91	91	118	733
KOMP-CSD	Conditional Ready	Promotorless	FALSE	731	741	777	3663
KOMP-CSD	Conditional Ready	Promotorless	TRUE	106	107	111	544
NorCOMM	Conditional Ready	Promotor Driven	FALSE	30	30	1	30
NorCOMM	Conditional Ready	Promotorless	FALSE	2	2	2	2

## Sheet: promotorless_design_info
Supplementary Table S2b: List of IKMC Intermediate Vectors (IV) used to generate Promoterless IKMC final targeting vectors, with or without internal PmeI restriction cut sites within their genomic homology arms. The presence of an additional internal PmeI site ("TRUE") in the IV precludes their use as a pI_hygGFP second allele targeting vector. Note that some genes have more than one IV and/or fi…
Gene MGI accession ID	MGI gene symbol	Chromosome	Strand	IKMC design ID	PmeI cut?	Mutation type	Cassette type	IKMC pipeline	IV clones	IKMC targeting vector clones	IKMC vector cassette	Number of IV clones	Number of IKMC targeting vector clones
MGI:1914088	0610009L18Rik	11	+	46983	FALSE	Conditional Ready	Promotorless	EUCOMM	PCS00063_A_F04	PG00063_B_4_F04 PGS00063_A_F04	L1L2_gt0	1	2
MGI:1915251	1110004E09Rik	16	-	44642	TRUE	Conditional Ready	Promotorless	EUCOMM	PCS00050_A_B08	PG00050_A_2_B08 PG00050_A_6_B08 PG00050_A_7_B08 PG00050_A_8_B08 PG00050_A_1_B08 PG00050_A_5_B08 PGS00050_A_B08	L1L2_gt1	1	7
MGI:1915868	1110012L19Rik	X	+	44265	FALSE	Conditional Ready	Promotorless	KOMP-CSD	PCS00049_A_G03	PG00049_A_4_H03 PGS00049_A_G03 PG00049_A_8_F03 PGS00049_B_G03 PG00049_A_4_G03	L1L2_gt0	1	5
MGI:1913435	1110037F02Rik	4	+	35859	FALSE	Conditional Ready	Promotorless	KOMP-CSD	PCS00021_A_G02	PG00021_C_3_G01 PGS00021_B_G02 PG00021_B_2_G02 PG00021_B_4_G02	L1L2_st0	1	4
MGI:1926146	1500015O10Rik	1	+	40480	TRUE	Conditional Ready	Promotorless	EUCOMM	PCS00046_A_C12	PG00046_A_1_C12 PG00046_A_4_C12 PGS00046_A_C12 PG00046_A_2_C12	L1L2_st1	1	4
MGI:1922687	1700006E09Rik	11	+	43426	FALSE	Conditional Ready	Promotorless	KOMP-CSD	PCS00045_A_G05	PG00045_A_8_G05 PG00045_D_4_G05 PG00045_A_6_G05 PG00045_D_4_G04 PG00045_A_5_G04 PG00045_A_6_G04 PG00045_A_8_G04 PG00045_B_2_G05 PG00045_D_2_G04 PG00045_A_1_G05 PG00045_A_5_G05 PG00045_A_2_G05 PGS00045_A_G05 PG00045_A_4_G05 PG00045_A_7_G05 PGS00045_D_G05 PG00045_D_2_G05 PG00045_B_3_G05 PG00045_D_3_G05 PG00045_A_3_G05	L1L2_gt1	1	20
MGI:1916574	1700012B07Rik	11	-	130	FALSE	Conditional Ready	Promotorless	EUCOMM	PCS00006_A_C06 PCS00016_A_C06	PG00006_A_3_C01 PG00006_A_4_C01 PGS00006_A_C01 PG00016_B_2_C06 PG00016_B_3_C06 PG00016_B_4_C06 PGS00016_A_C06	L1L2_gt2	2	7
MGI:1916630	1700013G24Rik	4	+	46435	FALSE	Conditional Ready	Promotorless	EUCOMM	PCS00060_A_E05	PG00060_A_1_E04 PG00060_A_3_E04 PG00060_A_4_E04 PGS00060_A_E05	L1L2_gt0	1	4
MGI:2685466	1700024P16Rik	4	+	452	FALSE	Conditional Ready	Promotorless	EUCOMM	PCS00007_A_C06 PCS00017_A_C06	PG00007_B_3_B06 PG00007_B_3_C06 PG00007_B_4_B06 PGS00007_A_C06 PG00017_B_3_C06 PGS00017_A_C06 PG00017_B_2_C06	L1L2_gt0	2	7
MGI:1923671	1700028K03Rik	5	+	45104	FALSE	Conditional Ready	Promotorless	KOMP-CSD	PCS00055_A_H02	PG00055_A_8_H02 PGS00055_B_H02 PGS00055_A_H02 PG00055_A_6_H02 PG00055_A_2_H02 PG00055_A_7_H02 PG00055_A_3_H02 PG00055_A_4_H02	L1L2_gt1	1	8
MGI:1914576	1700037H04Rik	2	-	39470	FALSE	Conditional Ready	Promotorless	EUCOMM	PCS00044_A_B06	PG00044_A_5_B06 PGS00044_A_B06 PG00044_A_8_B06	L1L2_gt1	1	3
MGI:1920731	1700074P13Rik	6	-	45172	FALSE	Conditional Ready	Promotorless	KOMP-CSD	PCS00055_A_B10	PGS00055_B_B10 PGS00055_A_B10 PG00055_A_5_B10 PG00055_A_3_B10	L1L2_st2	1	4
MGI:1921546	1700093J21Rik	16	+	45686	FALSE	Conditional Ready	Promotorless	EUCOMM	PCS00060_A_G01	PG00060_A_1_G01 PG00060_A_3_G01 PG00060_A_4_G01 PGS00060_A_G01	L1L2_gt0	1	4
MGI:1920884	1700125H20Rik	11	+	48	FALSE	Conditional Ready	Promotorless	EUCOMM	PCS00006_A_A12 PCS00016_A_A12	PG00006_A_1_A12 PG00006_A_2_A12 PG00006_A_4_A12 PGS00006_A_A12 PG00016_B_1_A11 PG00016_B_1_A12 PG00016_B_2_A11 PG00016_B_2_A12 PG00016_B_3_A11 PG00016_B_3_A12 PG00016_B_4_A11 PGS00016_A_A12 PG00006_A_3_A12 PG00016_B_4_A12	L1L2_gt2	2	14
MGI:1915134	1810043G02Rik	10	+	40868	FALSE	Conditional Ready	Promotorless	EUCOMM	PCS00026_B_C03	PG00026_A_4_C03 PG00026_B_1_C03 PG00026_B_3_C03 PGS00026_A_C03 PGS00026_B_C03	L1L2_gt0	1	5
MGI:1914965	2010106E10Rik	X	+	41128	TRUE	Conditional Ready	Promotorless	KOMP-CSD	PCS00027_A_H05	PGS00027_A_H05 PG00027_B_3_H05 PG00027_B_4_H05 PG00027_B_2_H05	L1L2_st1	1	4
MGI:1914623	2210010C04Rik	6	-	45180	FALSE	Conditional Ready	Promotorless	KOMP-CSD	PCS00055_A_E10	PGS00055_B_E10 PG00055_A_1_E10 PGS00055_A_E10 PG00055_A_2_E10 PG00055_A_3_E10	L1L2_st2	1	5
MGI:1919124	2310007B03Rik	1	-	45113	FALSE	Conditional Ready	Promotorless	KOMP-CSD	PCS00055_A_B03	PGS00055_A_B03 PG00055_A_3_B03 PG00055_A_1_B03 PG00055_A_2_B03 PGS00055_B_B03	L1L2_gt1	1	5
MGI:1924214	2610028H24Rik	10	+	40848	FALSE	Conditional Ready	Promotorless	EUCOMM	PCS00026_B_F08	PG00026_A_1_F08 PG00026_A_3_F08 PG00026_A_4_F08 PG00026_B_1_F08 PG00026_B_2_F08 PG00026_B_4_F08 PG00026_B_8_F08 PGS00026_A_F08 PGS00026_B_F08 PG00026_B_6_F08	L1L2_gt1	1	10
MGI:1917194	2810021J22Rik	11	+	285	FALSE	Conditional Ready	Promotorless	EUCOMM	PCS00004_A_H05	PG00004_A_2_H05 PG00004_A_4_H05 PGS00004_A_H05	L1L2_gt0	1	3
MGI:1920194	2900026A02Rik	5	-	44237	FALSE	Conditional Ready	Promotorless	EUCOMM	PCS00054_B_D07	PG00054_A_1_D07 PG00054_A_2_D07 PG00054_A_4_D07 PGS00054_A_D07 PG00054_A_3_D07	L1L2_gt2	1	5
MGI:1913848	3110001I22Rik	16	+	46622	TRUE	Conditional Ready	Promotorless	EUCOMM	PCS00062_A_E08	PG00062_A_1_E08 PG00062_A_2_E08 PG00062_A_4_E08 PGS00062_A_E08 PG00062_A_3_E08 PG00062_A_4_D09	L1L2_gt0	1	6
MGI:1918191	4921539E11Rik	4	-	43043	TRUE	Conditional Ready	Promotorless	KOMP-CSD	PCS00041_A_C03	PG00041_A_2_C03 PG00041_A_4_C03 PG00041_A_1_C03 PG00041_A_3_C03 PGS00041_A_C03	L1L2_gt1	1	5
MGI:1922104	4930402F06Rik	2	-	44212	FALSE	Conditional Ready	Promotorless	KOMP-CSD	PCS00048_A_A11	PGS00048_A_A11 PG00048_A_4_A11	L1L2_gt2	1	2
MGI:1926154	4930452B06Rik	14	-	39421	FALSE	Conditional Ready	Promotorless	EUCOMM	PCS00043_A_C05	PG00043_A_1_C05 PGS00043_A_C05	L1L2_gt0	1	2
MGI:1922263	4930502E18Rik	X	+	41161	FALSE	Conditional Ready	Promotorless	KOMP-CSD	PCS00027_A_D02	PGS00027_A_D02 PG00027_B_3_D03	L1L2_gt0	1	2
MGI:1922356	4930519F16Rik	X	-	40753	TRUE	Conditional Ready	Promotorless	EUCOMM	PCS00033_A_F02	PGS00033_A_F02 PG00033_A_4_F02	L1L2_st1	1	2
MGI:1914842	4930524B15Rik	11	+	242	TRUE	Conditional Ready	Promotorless	EUCOMM	PCS00035_A_F03	PG00035_A_2_F03 PG00035_A_2_G03 PG00035_A_3_F03 PGS00035_A_F03	L1L2_gt1	1	4
MGI:1923202	4930578G10Rik	4	+	369	FALSE	Conditional Ready	Promotorless	EUCOMM	PCS00005_A_H01	PG00005_A_1_H01 PGS00005_A_H01 PG00005_A_2_H01 PG00005_A_3_H01	L1L2_gt1	1	4
MGI:1915425	4930591A17Rik	2	+	44417	FALSE	Conditional Ready	Promotorless	KOMP-CSD	PCS00049_A_A04	PGS00049_A_A04 PGS00049_B_A04 PG00049_A_8_A03 PG00049_A_1_A04	L1L2_gt0	1	4
MGI:3045332	4932411E22Rik	11	-	38366	FALSE	Conditional Ready	Promotorless	KOMP-CSD	PCS00020_A_D07	PG00020_A_2_D07 PGS00020_A_D07	L1L2_gt1	1	2
MGI:1922971	4932414N04Rik	2	+	34526	FALSE	Conditional Ready	Promotorless	KOMP-CSD	PCS00052_A_A01	PG00052_A_1_A01 PGS00052_A_A01	L1L2_gt0	1	2
MGI:1921676	4933402D24Rik	1	-	43094	FALSE	Conditional Ready	Promotorless	KOMP-CSD	PCS00041_A_G03	PG00041_A_2_G03 PGS00041_A_G03	L1L2_gt1	1	2
MGI:3045336	4933409G03Rik	2	+	43877	FALSE	Conditional Ready	Promotorless	KOMP-CSD	PCS00045_A_D05	PG00045_A_4_D05 PG00045_B_2_D05 PG00045_B_4_D05 PG00045_A_7_D05 PG00045_A_8_D05 PG00045_B_1_D05 PG00045_B_3_D05 PG00045_D_3_D05 PG00045_D_1_D05 PG00045_D_2_D05 PG00045_D_4_D05 PG00045_A_3_D05 PGS00045_A_D05 PG00045_A_6_D05 PGS00045_D_D05 PG00045_A_1_D05	L1L2_gt1	1	16
MGI:1914013	4933425L06Rik	13	+	41731	FALSE	Conditional Ready	Promotorless	KOMP-CSD	PCS00031_A_A07	PG00031_A_2_A07 PGS00031_A_A07 PG00031_A_16_A07 PG00031_B_3_A07 PG00031_B_4_A07 PG00031_A_15_A07 PG00031_B_2_A07 PG00031_A_13_A07 PG00031_B_1_A07 PG00031_A_14_A08 PG00031_A_15_A08	L1L2_gt1 L1L2_st2	1	11
MGI:3026922	4933427D06Rik	6	+	45248	FALSE	Conditional Ready	Promotorless	KOMP-CSD	PCS00055_A_G07	PG00055_A_1_G07 PGS00055_B_G07 PGS00055_A_G07 PG00055_A_2_G07 PG00055_A_4_G07	L1L2_gt1	1	5
MGI:1921727	4933427D14Rik	11	-	33817	TRUE	Conditional Ready	Promotorless	EUCOMM	PCS00042_A_A05	PG00042_A_2_A06 PG00042_A_3_A06 PGS00042_A_A05	L1L2_gt0	1	3
MGI:1923930	5330417C22Rik	3	-	401	FALSE	Conditional Ready	Promotorless	EUCOMM	PCS00007_A_H03	PG00007_B_3_H03 PG00007_B_4_H03 PGS00007_A_H03 PG00007_B_2_H03	L1L2_gt0	1	4
MGI:2443793	6430548M08Rik	8	+	42359	FALSE	Conditional Ready	Promotorless	KOMP-CSD	PCS00036_A_A10	PGS00036_A_A10 PG00036_A_2_A10 PG00036_A_1_A10 PG00036_A_4_A10	L1L2_gt2	1	4
MGI:2444813	9030617O03Rik	12	+	42893	FALSE	Conditional Ready	Promotorless	KOMP-CSD	PCS00041_A_H10	PG00041_A_1_H10 PGS00041_A_H10	L1L2_st2	1	2
MGI:2444364	9430015G10Rik	4	+	616	FALSE	Conditional Ready	Promotorless	EUCOMM	PCS00007_A_H09 PCS00017_A_H09	PG00007_B_2_H09 PGS00007_A_H09 PG00017_B_3_H09 PG00017_B_4_H09 PGS00017_A_H09	L1L2_gt0 L1L2_st0	2	5
MGI:87853	a	2	+	40206	FALSE	Conditional Ready	Promotorless	EUCOMM	PCS00030_B_G04	PG00030_B_3_G04 PG00030_C_1_G04 PG00030_C_1_H04 PG00030_C_2_G05 PG00030_C_3_G04 PG00030_C_3_G05 PG00030_C_4_G04 PGS00030_B_G04 PGS00030_C_G04	L1L2_st1 L1L2_gt1	1	9
MGI:2685508	A830031A19Rik	11	-	43165	FALSE	Conditional Ready	Promotorless	KOMP-CSD	PCS00045_A_B04	PG00045_A_7_B04 PG00045_D_3_B04 PGS00045_D_B04	L1L2_gt1	1	3
MGI:1926144	Aacs	5	+	42260	FALSE	Conditional Ready	Promotorless	KOMP-CSD	PCS00036_A_G05	PGS00036_A_G05 PG00036_A_2_G05 PG00036_A_1_G05 PG00036_A_4_G05	L1L2_gt1	1	4
MGI:2685281	Aadacl3	4	-	43712	FALSE	Conditional Ready	Promotorless	KOMP-CSD	PCS00045_A_C11	PG00045_B_4_C11 PGS00045_D_C11 PGS00045_A_C11	L1L2_gt1	1	3
MGI:1197518	Aatk	11	-	41505	FALSE	Conditional Ready	Promotorless	KOMP-CSD	PCS00028_A_B07	PGS00028_A_B07 PG00028_B_4_B07 PG00028_B_1_B07 PG00028_B_3_B07	L1L2_st1	1	4
MGI:99607	Abca1	4	-	398	FALSE	Conditional Ready	Promotorless	EUCOMM	PCS00007_A_G03 PCS00017_A_G03	PGS00007_A_G03 PG00017_B_1_G03 PGS00017_A_G03 PG00017_B_2_G03	L1L2_gt0 L1L2_st0	2	4
MGI:2386607	Abca5	11	-	127	TRUE	Conditional Ready	Promotorless	EUCOMM	PCS00004_A_D05	PG00004_A_2_D05 PG00004_A_3_D05 PGS00004_A_D05	L1L2_gt0	1	3
MGI:1923434	Abca6	11	-	38695	FALSE	Conditional Ready	Promotorless	KOMP-CSD	PCS00020_A_D08	PG00020_A_3_D08	L1L2_gt1	1	1
MGI:1351668	Abca8b	11	-	131	FALSE	Conditional Ready	Promotorless	EUCOMM	PCS00004_A_D06 PCS00034_A_D06	PG00004_A_1_D06 PG00004_A_2_D06 PG00004_A_3_D06 PG00004_A_4_D06 PG00034_A_3_D07 PG00034_A_4_D07 PG00034_A_4_E07 PG00034_A_5_D07 PG00034_A_7_D07 PGS00034_A_D06 PGS00004_A_D06	L1L2_gt0	2	11
MGI:2386796	Abca9	11	-	43873	FALSE	Conditional Ready	Promotorless	KOMP-CSD	PCS00045_A_H06	PGS00045_D_H06 PG00045_A_5_H06 PG00045_D_1_H06 PG00045_D_4_H06	L1L2_gt1	1	4
MGI:1351619	Abcb11	2	-	27268	TRUE	Conditional Ready	Promotorless	EUCOMM	PCS00008_A_G09	PG00008_A_1_G09 PG00008_A_2_G09 PG00008_A_3_G09 PG00008_A_4_G09 PGS00008_A_G09	L1L2_gt1	1	5
MGI:1351667	Abcb8	5	+	42626	FALSE	Conditional Ready	Promotorless	EUCOMM	PCS00038_A_C10	PG00038_A_2_C10 PG00038_A_4_C10 PGS00038_A_C10 PG00038_A_3_C10	L1L2_gt0	1	4
MGI:1352447	Abcc2	19	+	44698	TRUE	Conditional Ready	Promotorless	KOMP-CSD	PCS00049_A_A10	PGS00049_B_A10 PG00049_A_3_A10 PGS00049_A_A10	L1L2_gt0	1	3
MGI:1349215	Abcd1	X	+	40651	FALSE	Conditional Ready	Promotorless	EUCOMM	PCS00030_B_D01	PG00030_B_3_D01 PG00030_C_1_D01 PG00030_C_3_D01 PG00030_C_4_D01 PGS00030_B_D01 PGS00030_C_D01 PG00030_C_2_D01	L1L2_gt0	1	7
MGI:1351624	Abcg3	5	-	44013	FALSE	Conditional Ready	Promotorless	KOMP-CSD	PCS00048_A_G08	PG00048_A_2_G08 PG00048_A_4_G08 PG00048_A_1_G08 PG00048_A_2_H10 PG00048_A_3_G08 PGS00048_A_G08	L1L2_gt2 L1L2_st2	1	6
MGI:2139365	Abtb2	2	+	41495	FALSE	Conditional Ready	Promotorless	KOMP-CSD	PCS00028_A_A09	PGS00028_A_A09 PG00028_B_4_A09 PG00028_B_1_A09 PG00028_B_3_A09	L1L2_gt1	1	4
MGI:87868	Acads	5	-	39380	FALSE	Conditional Ready	Promotorless	EUCOMM	PCS00044_A_H03	PG00044_A_5_H03 PGS00044_A_H03	L1L2_gt1	1	2
MGI:1914135	Acadsb	7	+	44721	FALSE	Conditional Ready	Promotorless	KOMP-CSD	PCS00049_A_E03	PGS00049_A_E03 PGS00049_B_E03 PG00049_A_2_E03 PG00049_A_4_E03 PG00049_A_3_E03 PG00049_A_7_E03	L1L2_gt0	1	6
MGI:2388270	Acap1	11	-	40074	FALSE	Conditional Ready	Promotorless	EUCOMM	PCS00030_B_A06	PG00030_A_1_A06 PG00030_A_2_A06 PG00030_A_3_A06 PG00030_B_1_A06 PG00030_B_4_A06 PG00030_C_2_A06 PG00030_C_3_A06 PG00030_C_4_A06 PGS00030_A_A06 PGS00030_B_A06 PGS00030_C_A06	L1L2_gt1	1	11
MGI:2153589	Acap3	4	+	44421	FALSE	Conditional Ready	Promotorless	EUCOMM	PCS00054_B_F07	PG00054_A_1_F07 PG00054_A_2_F07 PG00054_A_4_F07 PGS00054_A_F07	L1L2_gt2	1	4
MGI:3584519	Accsl	2	-	39407	FALSE	Conditional Ready	Promotorless	EUCOMM	PCS00044_A_B09	PG00044_A_5_B09 PG00044_A_6_B09 PG00044_A_7_B09 PGS00044_A_B09	L1L2_gt1	1	4
MGI:1920932	Acer2	4	+	430	FALSE	Conditional Ready	Promotorless	EUCOMM	PCS00017_A_B05	PG00017_B_1_B05 PG00017_B_2_C05 PG00017_B_3_B05 PG00017_B_3_C05 PG00017_B_4_B05 PG00017_B_4_C05 PGS00017_A_B05 PG00017_B_2_B05	L1L2_gt0	1	8
MGI:1920932	Acer2	4	+	46549	TRUE	Conditional Ready	Promotorless	EUCOMM	PCS00062_A_F07	PG00062_A_1_F07 PGS00062_A_F07	L1L2_gt1	1	2
MGI:1097689	Ackr1	1	-	187807	FALSE	Conditional Ready	Promotorless	EUCOMM	PCP10002_A_B03 PCP10002_A_B02	PFA0002_A_1_B03 PFA0002_A_2_B02 PFA0002_A_3_B02 PFA0002_A_3_B03 PFA0002_A_4_B02 PFA0002_A_4_B03 PFA0002_A_5_B03 PFA0002_A_6_B02 PFA0002_A_7_B03 PFA0002_A_8_B02 PFA0002_A_8_B03 PFA0002_A_5_B02	L1L2_gt0	2	12
MGI:2444345	Acnat2	4	-	36127	FALSE	Conditional Ready	Promotorless	KOMP-CSD	PCS00020_A_H05	PG00020_A_2_H05 PG00020_A_1_H05 PGS00020_A_H05	L1L2_gt1	1	3
MGI:87880	Aco2	15	+	39540	FALSE	Conditional Ready	Promotorless	EUCOMM	PCS00043_A_G01	GR00064_H02	L1L2_gt0	1	1
MGI:1913736	Acot11	4	-	39137	FALSE	Conditional Ready	Promotorless	EUCOMM	PCS00044_A_A12	PG00044_A_5_A12 PG00044_A_7_A12 PGS00044_A_A12	L1L2_gt2	1	3
MGI:1921406	Acot12	13	+	43067	FALSE	Conditional Ready	Promotorless	KOMP-CSD	PCS00041_A_B04	PG00041_A_4_B04 PGS00041_A_B04 PG00041_A_1_B04 PG00041_A_3_B04 PG00041_A_2_B04	L1L2_gt2	1	5
MGI:1914084	Acot13	13	-	29	TRUE	Conditional Ready	Promotorless	EUCOMM	PCS00004_A_B02 PCS00034_A_B02	PG00004_A_4_B02 PGS00004_A_B02 PG00034_A_1_G11 PG00034_A_3_G11 PGS00034_A_B02 PG00004_A_3_B02	L1L2_gt0	2	6
MGI:2158201	Acot8	2	-	33669	FALSE	Conditional Ready	Promotorless	EUCOMM	PCS00040_A_E11	PG00040_A_1_E11 PG00040_A_2_E11 PG00040_A_3_E11 PGS00040_A_E11	L1L2_gt2	1	4
MGI:1330812	Acox1	11	-	149	FALSE	Conditional Ready	Promotorless	EUCOMM	PCS00005_A_D02	PG00005_A_1_D02 PG00005_A_3_D02 PG00005_A_4_D02 PGS00005_A_D02 PG00005_A_2_D02	L1L2_gt1	1	5
MGI:1933156	Acox3	5	+	42314	FALSE	Conditional Ready	Promotorless	KOMP-CSD	PCS00048_A_F05	PG00048_A_1_F05 PGS00048_A_F05 PG00048_A_2_F05 PG00048_A_3_F05 PG00048_A_4_F05	L1L2_gt2	1	5
MGI:1931010	Acp6	3	+	41414	FALSE	Conditional Ready	Promotorless	EUCOMM	PCS00033_A_C06	PG00033_A_1_C06 PG00033_A_2_C06 PG00033_A_3_C06 PG00033_A_4_C06 PGS00033_A_C06	L1L2_st0	1	5
MGI:1354713	Acsl4	X	-	40719	FALSE	Conditional Ready	Promotorless	EUCOMM	PCS00033_A_A10	PG00033_A_3_A10 PGS00033_A_A10	L1L2_st1	1	2
MGI:894291	Acsl6	11	+	41350	FALSE	Conditional Ready	Promotorless	KOMP-CSD	PCS00028_A_C04	PG00028_B_1_C04 PGS00028_A_C04	L1L2_st0	1	2
MGI:2152200	Acsm1	7	+	42209	FALSE	Conditional Ready	Promotorless	KOMP-CSD	PCS00036_A_C03	PG00036_A_1_C03 PG00036_A_4_C03 PG00036_A_2_C03 PGS00036_A_C03 PG00036_A_3_C03	L1L2_gt0	1	5
MGI:1890773	Actn4	7	-	42037	FALSE	Conditional Ready	Promotorless	EUCOMM	PCS00037_A_C05	PG00037_A_2_C05 PG00037_A_3_C05 PGS00037_A_C05	L1L2_gt1	1	3
MGI:87911	Acvr1	2	-	27043	FALSE	Conditional Ready	Promotorless	EUCOMM	PCS00008_A_D10	PG00008_A_1_D10 PG00008_A_3_D10 PG00008_A_4_D10 PGS00008_A_D10	L1L2_gt1	1	4
MGI:1922822	Acyp2	11	-	239	FALSE	Conditional Ready	Promotorless	EUCOMM	PCS00005_A_F02 PCS00035_A_F02	PG00005_A_1_F02 PG00005_A_2_F02 PG00005_A_3_F02 PG00005_A_4_F02 PGS00005_A_F02 PG00035_A_2_F02 PG00035_A_3_F02 PG00035_A_4_F02 PGS00035_A_F02	L1L2_gt1	2	9
MGI:87916	Ada	2	-	35561	FALSE	Conditional Ready	Promotorless	KOMP-CSD	PCS00021_A_B02	PG00021_A_2_B01 PG00021_B_2_B02 PG00021_B_3_B01 PG00021_C_1_B02 PG00021_C_3_B01 PG00021_C_3_B02 PG00021_C_4_B01 PG00021_C_4_B02 PGS00021_A_B02 PGS00021_B_B02 PG00021_C_2_B01	L1L2_gt0 L1L2_st0	1	11
MGI:103258	Adad1	3	+	35764	FALSE	Conditional Ready	Promotorless	KOMP-CSD	PCS00023_E_G10	PG00023_E_3_G10 PG00023_E_4_G10 PG00023_E_1_G10 PG00023_E_2_G10 PGS00023_E_G10	L1L2_gt1	1	5
MGI:105378	Adam12	7	-	40408	FALSE	Conditional Ready	Promotorless	EUCOMM	PCS00030_B_A12	PG00030_C_2_A12 PG00030_C_3_A12 PG00030_C_4_A12 PGS00030_C_A12	L1L2_st2	1	4
MGI:105378	Adam12	7	-	40410	TRUE	Conditional Ready	Promotorless	EUCOMM	PCS00050_A_A12	PGS00050_A_A12 PG00050_A_1_A12	L1L2_st0	1	2
MGI:1333882	Adam15	3	-	41258	FALSE	Conditional Ready	Promotorless	EUCOMM	PCS00033_A_C07	PG00033_A_2_C07 PGS00033_A_C07	L1L2_st1	1	2
MGI:1096335	Adam17	12	-	40121	FALSE	Conditional Ready	Promotorless	EUCOMM	PCS00029_A_D09	PG00029_A_1_D09 PG00029_A_2_D09 PG00029_A_3_D09 PGS00029_A_D09	L1L2_st1	1	4
MGI:105986	Adam18	8	-	43843	FALSE	Conditional Ready	Promotorless	KOMP-CSD	PCS00048_A_B12	PGS00048_A_B12 PG00048_A_1_B12	L1L2_st2	1	2
MGI:105377	Adam19	11	+	47343	FALSE	Conditional Ready	Promotorless	EUCOMM	PCS00064_A_H11	PG00064_A_4_H11 PGS00064_A_H11	L1L2_st0	1	2
MGI:2685556	Adamts13	2	+	39284	FALSE	Conditional Ready	Promotorless	EUCOMM	PCS00011_A_E12 PCS00043_A_E12	PGS00011_A_E12 PG00043_A_1_E12 PG00043_A_2_E12 PG00043_A_3_E12 PG00043_A_4_E12 PGS00043_A_E12 PG00011_A_3_E12	L1L2_gt1 L1L2_st1	2	7
MGI:2429637	Adamts16	13	-	40100	FALSE	Conditional Ready	Promotorless	EUCOMM	PCS00029_A_B12	PG00029_A_3_B12 PGS00029_A_B12	L1L2_st1	1	2
MGI:1347356	Adamts2	11	+	263	FALSE	Conditional Ready	Promotorless	EUCOMM	PCS00034_A_G05	PGS00034_A_G05 PG00034_A_4_B08 PG00034_A_1_B08	L1L2_st0 L1L2_gt0	1	3
MGI:1347346	Adamts7	9	+	44269	FALSE	Conditional Ready	Promotorless	KOMP-CSD	PCS00048_A_A10	PG00048_A_1_A10 PGS00048_A_A10 PG00048_A_2_A10	L1L2_st0	1	3
MGI:1924989	Adamtsl1	4	+	414	FALSE	Conditional Ready	Promotorless	EUCOMM	PCS00007_A_F04	PG00007_B_3_F04 PGS00007_A_F04 PG00007_B_1_F04	L1L2_gt0	1	3
MGI:1925044	Adamtsl2	2	+	43858	FALSE	Conditional Ready	Promotorless	KOMP-CSD	PCS00045_A_B08	PG00045_A_6_B08 PG00045_B_2_B08 PG00045_A_5_B08 PG00045_D_2_B08 PG00045_D_3_B08 PG00045_D_4_B08 PG00045_B_1_B08 PG00045_A_7_B08 PGS00045_D_B08 PG00045_D_1_B08 PGS00045_A_B08	L1L2_st0	1	11
MGI:2663075	Adap2	11	+	14	FALSE	Conditional Ready	Promotorless	EUCOMM	PCS00006_A_A04	PG00006_A_3_A04 PG00006_A_4_A04 PGS00006_A_A04	L1L2_gt2	1	3
MGI:1889575	Adar	3	+	44703	FALSE	Conditional Ready	Promotorless	EUCOMM	PCS00050_A_E06	PG00050_A_4_E06 PG00050_A_5_E06 PG00050_A_7_E06 PGS00050_A_E06	L1L2_gt0	1	4
MGI:891999	Adarb1	10	-	40846	FALSE	Conditional Ready	Promotorless	EUCOMM	PCS00026_B_F01	PG00026_B_2_F01 PG00026_B_3_F01 PG00026_B_4_F01 PG00026_B_7_F01 PG00026_B_8_F01 PGS00026_B_F01 PG00026_B_6_F01	L1L2_gt0	1	7
MGI:2151118	Adarb2	13	+	42060	TRUE	Conditional Ready	Promotorless	KOMP-CSD	PCS00036_A_B05	PGS00036_A_B05 PG00036_A_1_B05 PG00036_A_3_B06	L1L2_gt1	1	3
MGI:2451244	Adgrb2	4	+	42012	FALSE	Conditional Ready	Promotorless	EUCOMM	PCS00032_A_E06	PG00032_A_1_E06 PG00032_A_3_E06 PGS00032_A_E06	L1L2_st1	1	3
MGI:3041203	Adgrd1	5	+	45840	FALSE	Conditional Ready	Promotorless	EUCOMM	PCS00060_A_C12	PG00060_A_1_C12 PG00060_A_2_C12 PG00060_A_3_C12 PG00060_A_4_C12 PGS00060_A_C12	L1L2_st1	1	5
MGI:1924846	Adgrf1	17	+	43780	FALSE	Conditional Ready	Promotorless	KOMP-CSD	PCS00045_A_E11	PGS00045_A_E11 PG00045_A_2_E10 PG00045_B_3_E11 PG00045_B_2_E11 PG00045_A_1_E10 PG00045_B_1_E11 PGS00045_D_E11 PG00045_A_3_E11 PG00045_A_4_E11 PG00045_B_4_E11	L1L2_st1 L1L2_gt0	1	10
MGI:1915298	Aen	7	+	43464	FALSE	Conditional Ready	Promotorless	EUCOMM	PCS00047_A_H04	PG00047_A_3_H04 PGS00047_A_H04	L1L2_gt0	1	2
MGI:1917542	Afap1	5	+	43194	FALSE	Conditional Ready	Promotorless	EUCOMM	PCS00050_A_B02	PG00050_A_4_G05 PG00050_A_8_B02 PGS00050_A_B02	L1L2_gt0	1	3
MGI:2448704	Afmid	11	+	47423	FALSE	Conditional Ready	Promotorless	EUCOMM	PCS00063_A_A04	PG00063_B_3_A04 PG00063_B_4_A04 PGS00063_A_A04	L1L2_gt0	1	3
MGI:2443254	Agbl2	2	+	39356	FALSE	Conditional Ready	Promotorless	EUCOMM	PCS00044_A_C05	PG00044_A_5_C05 PG00044_A_6_C05 PGS00044_A_C05	L1L2_gt1	1	3
MGI:1923473	Agbl3	6	+	37366	FALSE	Conditional Ready	Promotorless	KOMP-CSD	PCS00021_A_C07	PGS00021_A_C07	L1L2_gt0	1	1
MGI:2446630	Ago1	4	-	36769	FALSE	Conditional Ready	Promotorless	KOMP-CSD	PCS00023_E_B12	GR00006_F02	L1L2_gt1	1	1
MGI:2446634	Ago3	4	-	36767	TRUE	Conditional Ready	Promotorless	KOMP-CSD	PCS00023_E_D12	PG00023_E_1_D12 PGS00023_E_D12 PG00023_E_3_D12	L1L2_gt1	1	3
MGI:1924100	Ago4	4	-	488	TRUE	Conditional Ready	Promotorless	EUCOMM	PCS00007_A_C12 PCS00017_A_C12	PGS00007_A_C12 PG00017_B_3_C12 PGS00017_A_C12	L1L2_gt1	2	3
MGI:1336186	Agpat3	10	-	39981	FALSE	Conditional Ready	Promotorless	EUCOMM	PCS00026_B_D07	PG00026_A_1_D07 PG00026_A_2_D07 PG00026_A_3_D07 PG00026_A_4_D07 PGS00026_A_D07 PGS00026_B_D07 PG00026_B_4_D07	L1L2_st1	1	7
MGI:1344405	Agr2	12	+	39920	FALSE	Conditional Ready	Promotorless	EUCOMM	PCS00019_A_E07	PG00019_A_3_E07 PG00019_A_4_E07 PGS00019_A_E07	L1L2_st1	1	3
MGI:2146052	Agxt2	15	+	42687	TRUE	Conditional Ready	Promotorless	KOMP-CSD	PCS00041_A_B01	PGS00041_A_B01 PG00041_A_1_B01 PG00041_A_1_A01	L1L2_gt0	1	3
MGI:87968	Ahcy	2	-	39491	FALSE	Conditional Ready	Promotorless	EUCOMM	PCS00044_A_E03	PG00044_A_5_E03 PG00044_A_6_E03 PG00044_A_7_E03 PGS00044_A_E03 PG00044_A_8_E03	L1L2_gt1	1	5
MGI:1333776	Ahrr	13	-	41943	FALSE	Conditional Ready	Promotorless	KOMP-CSD	PCS00031_A_B04	PGS00031_A_B04 PG00031_B_1_B04 PG00031_B_3_B04	L1L2_gt0	1	3
MGI:1916133	Ahsa2	11	-	33771	FALSE	Conditional Ready	Promotorless	EUCOMM	PCS00040_A_B08	PGS00040_A_B08 PG00040_A_1_B08 PG00040_A_2_A07 PG00040_A_2_B08 PG00040_A_3_B08 PG00040_A_4_A07 PG00040_A_4_B08	L1L2_gt1	1	7
MGI:2138853	AI182371	2	-	34287	FALSE	Conditional Ready	Promotorless	KOMP-CSD	PCS00020_A_C01	PG00020_A_3_C01 PGS00020_A_C01 PG00020_A_1_C01 PG00020_A_4_C01	L1L2_st0	1	4
MGI:2140313	AI481877	4	-	423	FALSE	Conditional Ready	Promotorless	EUCOMM	PCS00007_A_H04 PCS00017_A_H04	PGS00007_A_H04 PG00017_B_3_H04 PGS00017_A_H04 PG00017_B_4_H04	L1L2_gt0	2	4
MGI:1919598	Aif1l	2	+	39300	FALSE	Conditional Ready	Promotorless	EUCOMM	PCS00042_A_G08	PGS00042_A_G08 PG00042_A_1_H08 PG00042_A_3_H08	L1L2_gt0	1	3
MGI:1349419	Aifm1	X	-	40577	FALSE	Conditional Ready	Promotorless	EUCOMM	PCS00033_A_E08	PG00033_A_2_E08 PG00033_A_2_F08 PG00033_A_3_E08 PG00033_A_4_E08 PGS00033_A_E08 PG00033_A_1_E08	L1L2_gt0	1	6
MGI:1334463	Aim1l	4	+	39202	FALSE	Conditional Ready	Promotorless	EUCOMM	PCS00042_A_B05	PG00042_A_1_B05 PG00042_A_2_B05 PG00042_A_3_B05 PGS00042_A_B05 PG00042_A_4_B05	L1L2_gt0	1	5
MGI:87979	Ak4	4	+	40030	FALSE	Conditional Ready	Promotorless	EUCOMM	PCS00030_B_F03	PG00030_B_1_F03 PGS00030_B_F03	L1L2_gt1	1	2
MGI:1916120	Ak8	2	+	39281	TRUE	Conditional Ready	Promotorless	EUCOMM	PCS00042_A_E02	PG00042_A_1_E02 PGS00042_A_E02	L1L2_gt0	1	2
MGI:2178217	Akap9	5	+	37213	FALSE	Conditional Ready	Promotorless	KOMP-CSD	PCS00023_E_A08	PG00023_E_3_A08 PG00023_D_2_A07 PG00023_D_4_A08 PG00023_E_1_A07 PG00023_C_1_A07 PG00023_D_1_H08 PG00023_E_3_A07 PGS00023_A_A08 PG00023_C_2_H08 PG00023_D_1_A07 PG00023_D_2_A08 PG00023_D_4_A07 PG00023_D_1_A08 PG00023_E_2_A07 PG00023_C_1_A08 PG00023_D_3_A08 PG00023_D_3_H08 PG00023_E_1_A08 PGS00023_E_A08 PG00023_C_2_A07	L1L2_gt0	1	20
MGI:2140340	Akna	4	-	19	FALSE	Conditional Ready	Promotorless	EUCOMM	PCS00005_A_A05	PG00005_A_1_A05 PG00005_A_2_A05 PG00005_A_3_A05 PGS00005_A_A05	L1L2_gt1	1	4
MGI:1929955	Akr1a1	4	-	510	FALSE	Conditional Ready	Promotorless	EUCOMM	PCS00017_A_E07	PG00017_B_2_E07 PGS00017_A_E07	L1L2_gt0	1	2
MGI:104874	Akt2	7	+	40417	FALSE	Conditional Ready	Promotorless	EUCOMM	PCS00029_A_E05	PG00029_A_1_D06 PG00029_A_1_E05 PG00029_A_3_D06 PG00029_A_3_E05 PG00029_A_4_E05 PGS00029_A_E05 PG00029_A_2_E05	L1L2_gt0	1	7
MGI:1345147	Akt3	1	-	39992	FALSE	Conditional Ready	Promotorless	EUCOMM	PCS00030_B_C10	PG00030_C_1_C10 PG00030_C_2_C10 PG00030_C_3_C10 PG00030_C_4_C10 PGS00030_C_C10	L1L2_gt2	1	5
MGI:96853	Alad	4	-	484	TRUE	Conditional Ready	Promotorless	EUCOMM	PCS00006_A_G06 PCS00016_A_G06	PG00006_A_3_F05 PG00006_A_4_F05 PGS00006_A_F05 PG00016_B_1_G06 PG00016_B_2_G06 PG00016_B_3_G06 PGS00016_A_G06 PG00006_A_1_F05	L1L2_gt2	2	8
MGI:1916998	Aldh16a1	7	-	42189	FALSE	Conditional Ready	Promotorless	EUCOMM	PCS00038_A_G03	PG00038_A_1_G03 PG00038_A_2_G03 PG00038_A_3_G03 PG00038_A_4_G03 PGS00038_A_G03	L1L2_gt1	1	5
MGI:1888908	Aldh18a1	19	-	44728	FALSE	Conditional Ready	Promotorless	KOMP-CSD	PCS00052_A_A04	PG00052_A_7_A04 PGS00052_A_A04 PG00052_A_6_A04 PG00052_A_7_B05	L1L2_gt1	1	4
MGI:107928	Aldh1a2	9	+	40308	FALSE	Conditional Ready	Promotorless	EUCOMM	PCS00029_A_E02	PG00029_A_3_E02 PG00029_A_4_E02 PGS00029_A_E02	L1L2_gt0	1	3
MGI:1340024	Aldh1l1	6	+	44466	FALSE	Conditional Ready	Promotorless	KOMP-CSD	PCS00049_A_B05	PG00049_A_4_B05	L1L2_gt1	1	1
MGI:2444680	Aldh1l2	10	-	43156	FALSE	Conditional Ready	Promotorless	KOMP-CSD	PCS00045_A_F01	PGS00045_A_F01 PG00045_A_7_F01 PG00045_A_8_F01 PG00045_B_1_F01 PG00045_D_1_F01 PG00045_A_4_F01 PG00045_B_2_F01 PG00045_D_4_F01 PG00045_B_4_F01 PGS00045_D_F01 PG00045_A_3_F01 PG00045_A_5_F01 PG00045_D_3_F01 PG00045_B_3_F01	L1L2_gt0	1	14
MGI:99600	Aldh2	5	-	42119	FALSE	Conditional Ready	Promotorless	EUCOMM	PCS00037_A_B01	PG00037_A_1_B01 PG00037_A_4_B01 PGS00037_A_B01	L1L2_gt0	1	3
MGI:1353451	Aldh3a1	11	+	293	FALSE	Conditional Ready	Promotorless	EUCOMM	PCS00004_A_H08	PG00004_A_1_H08 PG00004_A_2_H08 PGS00004_A_H08 PG00004_A_4_H08	L1L2_gt0	1	4
MGI:1353452	Aldh3a2	11	-	294	FALSE	Conditional Ready	Promotorless	EUCOMM	PCS00034_A_H09	PG00034_A_1_A04 PGS00034_A_H09	L1L2_gt0	1	2
MGI:1916363	Alkbh3	2	-	39406	FALSE	Conditional Ready	Promotorless	EUCOMM	PCS00042_A_H11	PG00042_A_2_G11 PG00042_A_3_G11 PGS00042_A_H11	L1L2_gt0	1	3
MGI:2136971	Allc	12	-	42392	FALSE	Conditional Ready	Promotorless	KOMP-CSD	PCS00045_A_H03	PG00045_A_7_H03 PG00045_A_6_H04 PG00045_D_4_H03 PG00045_A_7_H04 PG00045_D_1_H04 PG00045_D_2_H04 PG00045_A_6_H03 PG00045_D_2_H03 PGS00045_D_H03 PG00045_A_5_H04 PG00045_D_3_H03 PG00045_D_3_H04 PG00045_D_4_H04 PG00045_A_8_H03	L1L2_gt1	1	14
MGI:1345140	Aloxe3	11	+	37992	FALSE	Conditional Ready	Promotorless	KOMP-CSD	PCS00020_A_A08	PG00020_A_2_A08 PGS00020_A_A08 PG00020_A_1_A08	L1L2_gt1	1	3
MGI:2447532	Als2cl	9	+	44501	TRUE	Conditional Ready	Promotorless	KOMP-CSD	PCS00049_A_D05	PG00049_A_3_D05 PG00049_A_4_D05 PGS00049_B_D05 PGS00049_A_D05	L1L2_gt1	1	4
MGI:1920713	Als2cr11	1	-	42190	FALSE	Conditional Ready	Promotorless	KOMP-CSD	PCS00036_A_B02	PGS00036_A_B02 PG00036_A_1_B02 PG00036_A_3_B02	L1L2_gt0	1	3
MGI:1096344	Ampd3	7	+	42333	FALSE	Conditional Ready	Promotorless	KOMP-CSD	PCS00036_A_A08	PG00036_A_1_A08 PG00036_A_2_A08 PG00036_A_4_A08 PG00036_A_3_A08 PGS00036_A_A08	L1L2_gt2	1	5
MGI:2442258	Amz1	5	+	45133	FALSE	Conditional Ready	Promotorless	KOMP-CSD	PCS00055_A_D03	PG00055_A_6_D03 PG00055_A_8_D03 PG00055_A_1_D03 PG00055_A_3_D03 PG00055_A_4_D03 PGS00055_A_D03 PG00055_A_2_D03 PGS00055_B_D03	L1L2_gt1	1	8
MGI:104837	Amz2	11	+	43142	FALSE	Conditional Ready	Promotorless	KOMP-CSD	PCS00045_A_E01	PG00045_D_3_E01 PG00045_D_2_E01 PGS00045_D_E01 PG00045_D_1_E01 PG00045_A_5_E01 PG00045_A_8_E01 PG00045_D_4_E01 PG00045_A_6_E01 PG00045_A_7_E01	L1L2_gt0	1	9
MGI:1929711	Anapc7	5	+	45056	FALSE	Conditional Ready	Promotorless	EUCOMM	PCS00054_B_E08	PG00054_A_2_E08 PG00054_A_3_E08 PGS00054_A_E08	L1L2_gt2	1	3
MGI:1353627	Angptl3	4	+	36403	TRUE	Conditional Ready	Promotorless	KOMP-CSD	PCS00021_A_D05	PG00021_A_1_D05 PG00021_C_2_D05 PGS00021_B_D05 PG00021_B_3_D05 PG00021_C_1_D05 PGS00021_A_D05	L1L2_gt0 L1L2_st0	1	6
MGI:3045421	Ank	15	+	44732	FALSE	Conditional Ready	Promotorless	KOMP-CSD	PCS00052_A_A07	PGS00052_A_A07 PG00052_A_7_A07	L1L2_gt0	1	2
MGI:2686021	Ankfn1	11	-	64	FALSE	Conditional Ready	Promotorless	EUCOMM	PCS00016_A_B04	PG00016_B_2_B04 PG00016_B_3_B04 PGS00016_A_B04 PG00016_B_4_B04	L1L2_gt2	1	4
MGI:1914357	Ankrd12	17	-	42624	FALSE	Conditional Ready	Promotorless	EUCOMM	PCS00037_A_A04	PGS00037_A_A04 PG00037_A_2_A04 PG00037_A_3_A04	L1L2_gt0	1	3
MGI:1915670	Ankrd13a	5	+	37273	FALSE	Conditional Ready	Promotorless	KOMP-CSD	PCS00023_E_A05	PG00023_D_1_A05 PG00023_E_1_A05 PG00023_E_2_A05 PG00023_E_3_A05 PG00023_E_4_A05 PGS00023_A_A05 PGS00023_E_A05	L1L2_gt0	1	7
MGI:1923639	Ankrd36	11	+	214	FALSE	Conditional Ready	Promotorless	EUCOMM	PCS00006_A_D07 PCS00016_A_D07	PG00006_A_3_D01 PG00006_A_4_D01 PGS00006_A_D01 PG00016_B_1_C03 PG00016_B_1_D07 PG00016_B_2_C05 PG00016_B_2_D07 PG00016_B_3_C05 PG00016_B_3_D07 PG00016_B_4_C05 PG00016_B_4_D07 PGS00016_A_D07 PG00016_B_2_B05	L1L2_gt2	2	13
MGI:1923639	Ankrd36	11	+	215	FALSE	Conditional Ready	Promotorless	EUCOMM	PCS00005_A_E05 PCS00035_A_E05	PG00005_A_2_E05 PG00005_A_3_E05 PG00005_A_4_E05 PGS00005_A_E05 PG00035_A_4_E05 PGS00035_A_E05 PG00005_A_1_E05	L1L2_gt1	2	7
MGI:1922941	Anks6	4	-	36062	FALSE	Conditional Ready	Promotorless	KOMP-CSD	PCS00027_A_C11	PGS00027_A_C11 PG00027_B_2_C11	L1L2_gt2	1	2
MGI:2685256	Ankub1	3	-	41159	FALSE	Conditional Ready	Promotorless	EUCOMM	PCS00032_A_B01	PG00032_A_1_F11 PG00032_A_2_F11 PG00032_A_3_B01 PG00032_A_4_B01 PGS00032_A_B01	L1L2_gt0	1	5
MGI:1914878	Anp32b	4	+	33845	FALSE	Conditional Ready	Promotorless	EUCOMM	PCS00042_A_A02	PG00042_A_3_A02 PG00042_A_4_A02 PGS00042_A_A02	L1L2_gt0	1	3
MGI:88255	Anxa6	11	-	350	FALSE	Conditional Ready	Promotorless	EUCOMM	PCS00007_A_D02 PCS00017_A_D02 PCP10002_A_A11 PCP10002_A_A10	PG00007_B_1_D02 PGS00007_A_D02 PG00017_B_2_D02 PG00017_B_3_D02 PG00017_B_4_D02 PGS00017_A_D02 PFA0002_A_1_A11 PFA0002_A_2_A10 PFA0002_A_2_A11 PFA0002_A_3_A10 PFA0002_A_4_A10 PFA0002_A_4_A11 PFA0002_A_7_A10 PG00007_B_2_D02 PFA0002_A_3_A11 PFA0002_A_1_A10 PFA0002_A_6_A10	L1L2_gt0	4	17
MGI:1918974	Aox3	1	+	44528	FALSE	Conditional Ready	Promotorless	EUCOMM	PCS00050_A_F05	PG00050_A_1_F05 PG00050_A_2_F05 PG00050_A_3_F05 PG00050_A_4_F05 PG00050_A_5_F05 PG00050_A_8_F05 PGS00050_A_F05	L1L2_gt0	1	7
MGI:1919122	Aox4	1	+	44524	FALSE	Conditional Ready	Promotorless	KOMP-CSD	PCS00049_A_C03	PGS00049_A_C03 PG00049_A_5_C03 PGS00049_B_C03 PG00049_A_6_C03	L1L2_gt0	1	4
MGI:1096368	Ap1b1	11	+	210	FALSE	Conditional Ready	Promotorless	EUCOMM	PCS00004_A_E12 PCS00034_A_E12	PG00004_A_1_E12 PG00004_A_2_E12 PG00004_A_4_E12 PGS00004_A_E12 PG00034_A_8_D01 PGS00034_A_E12 PG00004_A_3_E12	L1L2_gt0	2	7
MGI:1919020	Ap2b1	11	+	38218	TRUE	Conditional Ready	Promotorless	KOMP-CSD	PCS00023_E_E09	PG00023_E_3_E09 PGS00023_A_E09 PGS00023_E_E09 PG00023_E_1_E09 PG00023_D_3_E09	L1L2_gt1	1	5
MGI:1336993	Ap4e1	2	+	35132	FALSE	Conditional Ready	Promotorless	KOMP-CSD	PCS00023_E_B07	PG00023_C_4_B07 PG00023_C_1_B07 PG00023_D_2_B07 PG00023_E_3_B07 PG00023_C_3_B07 PGS00023_A_B07 PGS00023_E_B07 PG00023_D_1_B07 PG00023_D_4_B07 PG00023_E_4_B07 PG00023_C_2_B07	L1L2_gt0	1	11
MGI:1926788	Apip	2	+	27760	TRUE	Conditional Ready	Promotorless	EUCOMM	PCS00008_A_F01	PG00008_A_1_F01 PG00008_A_2_F01 PG00008_A_3_F01 PG00008_A_4_F01 PGS00008_A_F01	L1L2_gt0	1	5
MGI:1919131	Apmap	2	-	44207	FALSE	Conditional Ready	Promotorless	KOMP-CSD	PCS00049_A_G10	PG00049_A_4_G10 PGS00049_A_G10 PGS00049_B_G10	L1L2_gt2	1	3
MGI:88057	Apoe	7	-	213835	FALSE	Conditional Ready	Promotorless	KOMP-CSD	PCS00159_A_B12	PLB60002_B_2_F02 PLB60002_B_4_F03 PLB60002_B_1_F03 PLBS60002_B_E02	pL1L2_GT1_DelLacZ_bsd	1	4
MGI:1913658	Aptx	4	-	368	FALSE	Conditional Ready	Promotorless	EUCOMM	PCS00006_A_F07 PCS00016_A_F07	PG00006_A_1_E10 PG00006_A_3_E10 PG00006_A_4_E10 PGS00006_A_E10 PGS00016_A_F07	L1L2_gt2	2	5
MGI:103201	Aqp1	6	+	44540	FALSE	Conditional Ready	Promotorless	EUCOMM	PCS00050_A_F12	PG00050_A_1_F12 PG00050_A_6_F12 PG00050_A_7_F12 PG00050_A_8_F12 PGS00050_A_F12 PG00050_A_2_F12	L1L2_st0	1	6
MGI:1333777	Aqp3	4	-	213839	FALSE	Conditional Ready	Promotorless	KOMP-CSD	PC00159_A_3_C07 PC00159_A_2_C07 PC00159_A_5_C07 PC00159_A_1_C07 PC00159_A_6_C07 PC00159_A_7_C07 PC00159_A_4_C07 PCS6003_A_B05 PCS00159_A_C07	MOHSA60005_D_3_A06 MOHSA60005_D_1_A06 MOHSA60005_D_8_A06 MOHSA60005_D_2_A06 MOHSAS60005_D_G07 MOHSAS60005_D_H04 MOHSAS60005_D_H03 MOHSAS60005_D_H01 MOHSAS60005_D_G10 MOHSAS60005_D_G01 MOHSAS60005_D_G06 MOHSAS60005_D_G08 MOHSAS60005_D_F12 MOHSAS60005_D_G04 MOHSAS60005_D_G05 MOHSA60005_D_6_A06 MOHSA60005_D_5_A08 MOHSA60005_D_7_A04 MOHSA60005_D_3_A04 MOHSA60005_D_3_A09 MOHSA60005_D_6_A09 MOHSA60005_…	pL1L2_GT0_DelLacZ_bsd	9	69
MGI:1921160	Arhgap18	10	+	44771	FALSE	Conditional Ready	Promotorless	KOMP-CSD	PCS00052_A_G05	PGS00052_A_G05 PG00052_A_6_G05 PG00052_A_8_G05 PG00052_A_7_G05	L1L2_gt2	1	4
MGI:2445175	Arhgap20	9	+	42734	TRUE	Conditional Ready	Promotorless	KOMP-CSD	PCS00041_A_C01	PGS00041_A_C01 PG00041_A_4_C01 PG00041_A_2_C01 PG00041_A_3_C01	L1L2_gt0	1	4
MGI:2443418	Arhgap22	14	+	41944	FALSE	Conditional Ready	Promotorless	KOMP-CSD	PCS00031_A_G04	PG00031_A_4_G04 PG00031_A_2_G04 PGS00031_A_G04	L1L2_gt1	1	3
MGI:2443687	Arhgap25	6	-	41908	FALSE	Conditional Ready	Promotorless	KOMP-CSD	PCS00036_A_A09	PG00036_A_1_A09 PG00036_A_2_A09 PG00036_A_3_A09 PG00036_A_4_A09 PGS00036_A_A09	L1L2_gt2	1	5
MGI:1333857	Arhgap31	16	-	41948	FALSE	Conditional Ready	Promotorless	KOMP-CSD	PCS00031_A_H04	PGS00031_A_H04 PG00031_B_2_H04	L1L2_gt1	1	2
MGI:2144423	Arhgap44	11	-	43167	FALSE	Conditional Ready	Promotorless	EUCOMM	PCS00047_A_A11	PG00047_A_2_A11 PGS00047_A_A11 PG00047_A_1_A11	L1L2_st0	1	3
MGI:1920004	Arhgef10l	4	-	47304	FALSE	Conditional Ready	Promotorless	EUCOMM	PCS00064_A_F07	PG00064_A_1_F07 PG00064_A_3_F07 PG00064_A_4_F07 PGS00064_A_F07	L1L2_gt1	1	4
MGI:1924919	Arhgef38	3	-	44938	FALSE	Conditional Ready	Promotorless	KOMP-CSD	PCS00052_A_F04	PGS00052_A_F04 PG00052_A_3_F04 PG00052_A_8_F04 PG00052_A_5_F04 PG00052_A_6_F04 PG00052_A_7_F04	L1L2_gt1	1	6
MGI:1920591	Arhgef6	X	-	40717	TRUE	Conditional Ready	Promotorless	EUCOMM	PCS00033_A_G07	PG00033_A_3_G07 PG00033_A_4_G07 PGS00033_A_G07	L1L2_gt0	1	3
MGI:1926129	Arid1b	17	+	42688	FALSE	Conditional Ready	Promotorless	EUCOMM	PCS00047_A_G08	PGS00047_A_G08 PG00047_A_3_G08	L1L2_gt1	1	2
MGI:1926129	Arid1b	17	+	47092	FALSE	Conditional Ready	Promotorless	EUCOMM	PCS00062_A_G12	PG00062_A_2_G12 PG00062_A_3_G12 PG00062_A_4_G12 PGS00062_A_G12	L1L2_gt0	1	4
MGI:1924294	Arid2	15	+	39688	FALSE	Conditional Ready	Promotorless	EUCOMM	PCS00019_A_C10	PG00019_A_1_C10 PG00019_A_2_C10 PG00019_A_3_C10 PG00019_A_4_C10 PGS00019_A_C10 MOHFA50001_D_2_G08 MOHFA50001_D_4_G08 PLNS50001_D_A06 MOHFA50001_D_5_G08 MOHFA50001_D_3_G08 MOHFA50001_D_1_G08	L1L2_gt2	1	11
MGI:1328360	Arid3a	10	+	42247	FALSE	Conditional Ready	Promotorless	KOMP-CSD	PCS00037_A_D01	PG00037_A_2_D01 PG00037_A_4_D01 PGS00037_A_D01 PG00037_A_3_D01 PLNS50001_D_B09 MOHFA50001_D_5_B02 MOHFA50001_D_3_B03	L1L2_gt0	1	7
MGI:2444354	Arid4a	12	+	39692	TRUE	Conditional Ready	Promotorless	EUCOMM	PCS00019_A_B06	PG00019_A_1_B06 PG00019_A_3_B06 PG00019_A_4_B06 PGS00019_A_B06 PG00019_A_2_B06	L1L2_gt1	1	5
MGI:1915396	Arl13b	16	-	42572	TRUE	Conditional Ready	Promotorless	EUCOMM	PCS00037_A_A07	PG00037_A_1_A06 PG00037_A_4_A06 PGS00037_A_A07	L1L2_gt1	1	3
MGI:1933155	Arl4d	11	+	47396	FALSE	Conditional Ready	Promotorless	EUCOMM	PCS00064_A_B05	PG00064_A_1_B05 PG00064_A_1_G04 PG00064_A_2_G04 PG00064_A_3_B05 PG00064_A_4_G04 PGS00064_A_B05 PG00064_A_2_B05	L1L2_gt0	1	7
MGI:1929501	Arl6ip5	6	+	43433	TRUE	Conditional Ready	Promotorless	EUCOMM	PCS00054_B_C10	PG00054_A_1_C10 PG00054_A_4_C10 PGS00054_A_C10	L1L2_gt2	1	3
MGI:2684845	Arntl2	6	+	42328	FALSE	Conditional Ready	Promotorless	KOMP-CSD	PCS00036_A_E08	PG00036_A_3_E08 PGS00036_A_E08 PG00036_A_2_E08	L1L2_gt2	1	3
MGI:1923959	Arpc2	1	+	39535	FALSE	Conditional Ready	Promotorless	EUCOMM	PCS00043_A_E01	PG00043_A_2_E01 PG00043_A_4_E01 PGS00043_A_E01	L1L2_gt0	1	3
MGI:1915339	Arpc4	6	+	39529	FALSE	Conditional Ready	Promotorless	EUCOMM	PCS00043_A_D02	PG00043_A_4_D02 PGS00043_A_D02	L1L2_gt0	1	2
MGI:1921442	Arpc5l	2	+	33615	FALSE	Conditional Ready	Promotorless	EUCOMM	PCS00008_A_H08	PG00008_A_1_H08 PG00008_A_2_H08 PG00008_A_3_H08 PGS00008_A_H08	L1L2_gt1	1	4
MGI:109620	Arvcf	16	+	44477	FALSE	Conditional Ready	Promotorless	EUCOMM	PCS00050_A_B05	PG00050_A_1_B05 PG00050_A_2_B05 PG00050_A_3_B05 PG00050_A_4_B05 PG00050_A_5_B05 PG00050_A_6_B05 PG00050_A_8_B05 PGS00050_A_B05	L1L2_gt0	1	8
MGI:2684986	Asap3	4	+	39179	FALSE	Conditional Ready	Promotorless	EUCOMM	PCS00042_A_E10	PG00042_A_1_E10 PGS00042_A_E10	L1L2_gt0	1	2
MGI:2152836	Asb10	5	-	45034	FALSE	Conditional Ready	Promotorless	KOMP-CSD	PCS00055_A_A06	PG00055_A_4_A06 PG00055_A_1_A05 PGS00055_A_A06 PGS00055_B_A06 PG00055_A_3_A06 PG00055_A_2_A06 PG00055_A_1_A06	L1L2_gt2	1	7
MGI:2654437	Asb16	11	+	94	FALSE	Conditional Ready	Promotorless	EUCOMM	PCS00035_A_B12	PG00035_A_1_B12 PGS00035_A_B12	L1L2_gt1	1	2
MGI:1929743	Asb2	12	-	41925	FALSE	Conditional Ready	Promotorless	KOMP-CSD	PCS00031_A_B08	PG00031_B_4_B08 PG00031_B_1_B08 PGS00031_A_B08 PG00031_B_3_B08	L1L2_gt2	1	4
MGI:1916549	Asb9	X	+	41101	FALSE	Conditional Ready	Promotorless	KOMP-CSD	PCS00049_A_B01	PG00049_A_2_B01 PG00049_A_3_B01 PGS00049_B_B01 PGS00049_A_B01 PG00049_A_1_B01	L1L2_gt0	1	5
MGI:1344416	Ash2l	8	-	48847	FALSE	Conditional Ready	Promotorless	EUCOMM		MOHSA60005_D_6_B05 MOHSA60005_D_4_B05 MOHSA60005_D_8_F10 MOHSA60005_D_1_F10 MOHSA60005_D_1_B07 MOHSA60005_D_8_B07 MOHSA60005_D_6_B04 MOHSA60005_D_6_F10 MOHSA60005_D_7_F10 MOHSA60005_D_5_B05 MOHSA60005_D_1_B05 MOHSA60005_D_6_B06 MOHSA60005_D_4_F10 MOHSA60005_D_2_F10 MOHSA60005_D_3_C05 MOHSA60005_D_3_B04 MOHSA60005_D_3_B07 MOHSA60005_D_4_B07 MOHSA60005_D_1_C05 MOHSA60005_D_4_C05 MOHSA60005_D_6_C05 …	pL1L2_GT2_DelLacZ_bsd	1	60
MGI:1100867	Asic2	11	-	33657	FALSE	Conditional Ready	Promotorless	EUCOMM	PCS00040_A_D04	PG00040_A_1_D04 PGS00040_A_D04	L1L2_gt0	1	2
MGI:1929259	Asic5	3	+	42708	TRUE	Conditional Ready	Promotorless	KOMP-CSD	PCS00041_A_D07	PG00041_A_1_D07 PGS00041_A_D07 PG00041_A_2_D07	L1L2_gt2	1	3
MGI:1350929	Asns	6	-	41587	FALSE	Conditional Ready	Promotorless	EUCOMM	PCS00032_A_B03	PG00032_A_1_B03 PG00032_A_2_B03 PG00032_A_3_B03 PG00032_A_4_B03 PGS00032_A_B03	L1L2_gt0	1	5
MGI:87914	Aspa	11	-	334	FALSE	Conditional Ready	Promotorless	EUCOMM	PCS00006_A_E10 PCS00016_A_E10	PG00006_A_3_E02 PG00006_A_4_E02 PG00016_B_1_E10 PG00016_B_2_E10 PG00016_B_3_E10 PG00016_B_4_E10 PGS00016_A_E10 PGS00006_A_E02	L1L2_gt2	2	8
MGI:1334448	Aspm	1	+	40877	FALSE	Conditional Ready	Promotorless	KOMP-CSD	PCS00026_B_A08	PG00026_B_7_A09 PGS00026_B_A08 PG00026_B_1_A08 PG00026_B_4_A08 PG00026_B_3_A08	L1L2_gt1	1	5
MGI:1913845	Aste1	9	+	41675	FALSE	Conditional Ready	Promotorless	KOMP-CSD	PCS00031_A_H08	PGS00031_A_H08 PG00031_B_2_H08	L1L2_gt0	1	2
MGI:3046414	Astl	2	+	39496	FALSE	Conditional Ready	Promotorless	EUCOMM	PCS00044_A_G09	PG00044_A_5_G09 PG00044_A_8_G09 PGS00044_A_G09	L1L2_st1	1	3
MGI:1889277	Astn2	4	-	24	FALSE	Conditional Ready	Promotorless	EUCOMM	PCS00005_A_A07	PG00005_A_1_A07 PG00005_A_2_A07 PG00005_A_3_A07 PG00005_A_4_A07 PGS00005_A_A07	L1L2_gt1	1	5
MGI:2684063	Asxl1	2	+	35367	FALSE	Conditional Ready	Promotorless	EUCOMM	PCS00026_B_D12	PGS00026_B_D12 PG00026_B_3_D12	L1L2_gt2	1	2
MGI:1921318	Asz1	6	-	43038	FALSE	Conditional Ready	Promotorless	KOMP-CSD	PCS00041_A_B03	PG00041_A_2_B03 PG00041_A_1_B03 PGS00041_A_B03	L1L2_gt1	1	3
MGI:2442925	Atad5	11	+	38193	FALSE	Conditional Ready	Promotorless	KOMP-CSD	PCS00021_A_D01	PG00021_B_1_D01 PG00021_B_4_D01 PG00021_B_2_D01 PGS00021_B_D01	L1L2_st0	1	4
MGI:1924290	Atg16l1	1	+	43715	FALSE	Conditional Ready	Promotorless	EUCOMM	PCS00046_A_C09	PLBS60002_B_C04 PLB60002_B_3_H01 PLB60002_B_2_H01 PLB60002_B_4_H01 PLB60002_B_1_H01 PG00046_A_1_C09 PG00046_A_2_C09 PGS00046_A_C09 PG00046_A_3_C09	pL1L2_GT2_DelLacZ_bsd L1L2_gt2	1	9
MGI:1915091	Atg3	16	+	43850	FALSE	Conditional Ready	Promotorless	EUCOMM	PCS00047_A_A07	PG00047_A_1_A07 PG00047_A_2_A07 PG00047_A_4_A07 PGS00047_A_A07	L1L2_gt0	1	4
MGI:2651854	Atg4c	4	+	39125	FALSE	Conditional Ready	Promotorless	EUCOMM	PCS00043_A_B11	PG00043_A_1_B11 PG00043_A_2_B11 PGS00043_A_B11	L1L2_gt1	1	3
MGI:2442688	Atp10b	11	+	249	FALSE	Conditional Ready	Promotorless	EUCOMM	PCS00006_A_D11 PCS00016_A_D11	PG00006_A_1_D04 PG00006_A_2_D04 PG00006_A_3_D04 PG00006_A_4_D04 PGS00006_A_D04 PG00016_B_3_D11 PG00016_B_4_D10 PGS00016_A_D11	L1L2_gt2	2	8
MGI:1922022	Atp13a2	4	+	40031	FALSE	Conditional Ready	Promotorless	EUCOMM	PCS00029_A_H06	PG00029_A_3_H06 PG00029_A_4_H06 PGS00029_A_H06	L1L2_gt0	1	3
MGI:2685387	Atp13a3	16	-	46896	TRUE	Conditional Ready	Promotorless	EUCOMM	PCS00063_A_E09	PG00063_B_3_E09 PG00063_B_4_E09 PGS00063_A_E09 PG00063_B_2_E09	L1L2_gt0	1	4
MGI:2444068	Atp13a5	16	-	44363	FALSE	Conditional Ready	Promotorless	KOMP-CSD	PCS00049_A_G09	PGS00049_A_G09 PGS00049_B_G09 PG00049_A_6_G09 PG00049_A_1_G09 PG00049_A_2_G09	L1L2_gt0	1	5
MGI:1915071	Atp1b4	X	+	41059	FALSE	Conditional Ready	Promotorless	KOMP-CSD	PCS00027_A_A05	PGS00027_A_A05 PG00027_B_1_A05	L1L2_gt1	1	2
MGI:1347353	Atp2b3	X	+	41098	FALSE	Conditional Ready	Promotorless	KOMP-CSD	PCS00027_A_F09	GR00031_F04	L1L2_gt2	1	1
MGI:88115	Atp5a1	18	+	44111	FALSE	Conditional Ready	Promotorless	EUCOMM	PCS00046_A_B07	PG00046_A_2_B07 PG00046_A_3_B07 PG00046_A_4_B07 PGS00046_A_B07	L1L2_gt1	1	4
MGI:1916025	Atp6v1c2	12	-	42482	FALSE	Conditional Ready	Promotorless	EUCOMM	PCS00036_A_A06	PG00036_A_1_A06 PG00036_A_2_A06 PG00036_A_3_A06 PG00036_A_4_A06 PGS00036_A_A06	L1L2_gt1	1	5
MGI:1913540	Atp6v1g1	4	+	36223	FALSE	Conditional Ready	Promotorless	KOMP-CSD	PCS00023_E_D09	PG00023_E_3_D09 PGS00023_E_D09	L1L2_gt1	1	2
MGI:2450548	Atp6v1g3	1	+	45209	TRUE	Conditional Ready	Promotorless	KOMP-CSD	PCS00055_A_H03	PG00055_A_4_H03 PGS00055_A_H03 PGS00055_B_H03 PG00055_A_3_G03 PG00055_A_3_H03 PG00055_A_8_H03 PG00055_A_1_H03	L1L2_gt1	1	7
MGI:99400	Atp7a	X	+	44904	FALSE	Conditional Ready	Promotorless	EUCOMM	PCS00060_A_C08	PG00060_A_1_C08 PG00060_A_2_C08 PG00060_A_3_C08 PGS00060_A_C08	L1L2_gt0	1	4
MGI:2180560	Atpaf1	4	+	44214	FALSE	Conditional Ready	Promotorless	KOMP-CSD	PCS00049_A_C08	PG00049_A_8_C08 PGS00049_B_C08 PGS00049_A_C08 PG00049_A_1_C08	L1L2_gt2	1	4
MGI:2180561	Atpaf2	11	-	37876	FALSE	Conditional Ready	Promotorless	KOMP-CSD	PCS00020_A_H03	PGS00020_A_H03 PG00020_A_2_H03	L1L2_gt0	1	2
MGI:103067	Atrx	X	-	47829	FALSE	Conditional Ready	Promotorless	EUCOMM	PCS00065_A_C04 PCS00065_C_C04	MOHSAS60005_D_C06 MOHSAS60005_D_C07 MOHSA60005_D_5_C06 MOHSA60005_D_2_C08 MOHSAS60005_D_C08 MOHSA60005_D_3_C06	pL1L2_GT1_DelLacZ_bsd	2	6
MGI:2140475	AU040320	4	+	497	FALSE	Conditional Ready	Promotorless	EUCOMM	PCS00007_A_F12 PCS00017_A_F12	PG00007_B_2_F12 PG00007_B_4_F12 PGS00007_A_F12 PG00017_B_1_F12 PGS00017_A_F12 PG00017_B_4_F12 PG00017_B_2_F12	L1L2_gt1 L1L2_st1	2	7
MGI:1921518	Aven	2	+	27927	FALSE	Conditional Ready	Promotorless	EUCOMM	PCS00008_A_F05	PG00008_A_2_F05 PG00008_A_4_F05 PGS00008_A_F05 PG00008_A_3_F05	L1L2_gt0	1	4
MGI:88121	Avp	2	-	40189	FALSE	Conditional Ready	Promotorless	EUCOMM	PCS00029_A_B06	PG00029_A_1_B06 PG00029_A_2_B06 PG00029_A_3_B06 PGS00029_A_B06 PG00029_A_4_B06	L1L2_st0	1	5
MGI:1924602	Axdnd1	1	-	41746	FALSE	Conditional Ready	Promotorless	KOMP-CSD	PCS00031_A_E04	PG00031_A_2_E04 PG00031_A_14_E04 PG00031_A_3_E04 PG00031_B_1_E04 PGS00031_A_E04 PG00031_A_15_E04 PG00031_A_1_E04	L1L2_gt0	1	7
MGI:1859169	Azin1	15	-	42941	FALSE	Conditional Ready	Promotorless	EUCOMM	PCS00046_A_A02	PG00046_A_1_A02 PG00046_A_3_A02 PG00046_A_4_A02 PGS00046_A_A02	L1L2_gt0	1	4
MGI:2442093	Azin2	4	-	47121	FALSE	Conditional Ready	Promotorless	EUCOMM	PCS00064_A_E02	PG00064_A_1_E02 PG00064_A_3_E02 PG00064_A_4_E02 PGS00064_A_E02 MPGS8003_A_B08 PG00064_A_2_E02	L1L2_gt0	1	6
MGI:3588238	B020004J07Rik	4	-	43374	FALSE	Conditional Ready	Promotorless	KOMP-CSD	PCS00045_A_B06	PG00045_A_5_B06 PGS00045_D_B06 PG00045_D_1_B06	L1L2_gt2	1	3
MGI:1915420	B230118H07Rik	2	-	34721	FALSE	Conditional Ready	Promotorless	KOMP-CSD	PCS00045_A_B01	PG00045_D_3_B01 PG00045_D_2_B01 PG00045_A_7_B01 PG00045_D_1_B01 PG00045_D_4_B01 PG00045_A_6_B01 PG00045_A_8_B01 PG00045_A_5_B01 PGS00045_D_B01	L1L2_gt0	1	9
MGI:2441705	B3gntl1	11	-	33747	FALSE	Conditional Ready	Promotorless	EUCOMM	PCS00040_A_A06	PG00040_A_3_A06 PG00040_A_4_A06 PGS00040_A_A06 PG00040_A_2_A06	L1L2_gt1	1	4
MGI:95705	B4galt1	4	-	372	FALSE	Conditional Ready	Promotorless	EUCOMM	PCS00005_A_H04 PCS00035_A_H04	PG00005_A_1_H04 PG00005_A_3_H04 PGS00005_A_H04 PGS00035_A_H04 PG00005_A_2_H04	L1L2_gt1 L1L2_st1	2	5
MGI:1351471	B9d1	11	+	296	FALSE	Conditional Ready	Promotorless	EUCOMM	PCS00004_A_H10 PCS00034_A_H10	PG00004_A_1_H10 PG00004_A_2_H10 PG00004_A_4_H10 PGS00004_A_H10 PG00034_A_1_A03 PG00034_A_8_A03 PGS00034_A_H10 PG00004_A_3_H10	L1L2_gt0 L1L2_st0	2	8
MGI:108047	Bag1	4	-	370	FALSE	Conditional Ready	Promotorless	EUCOMM	PCS00005_A_H02 PCS00035_A_H02	PG00005_A_1_H02 PG00005_A_2_H02 PG00005_A_3_H02 PGS00005_A_H02 PGS00035_A_H02 PG00035_A_2_H02	L1L2_gt1	2	6
MGI:2139371	Bahd1	2	+	44058	FALSE	Conditional Ready	Promotorless	KOMP-CSD	PCS00048_A_C03	PG00048_A_3_C03 PGS00048_A_C03 PG00048_A_4_C03	L1L2_gt0	1	3
MGI:1206586	Bap1	14	+	78193	FALSE	Conditional Ready	Promotorless	EUCOMM	PCTS00090_A_B05 PCP10002_A_A01	MOHSA60005_D_1_C10 MOHSA60005_D_3_C10 MOHSAS60005_D_E08 MOHSAS60005_D_E05 MOHSAS60005_D_E07 MOHSA60005_D_2_C10 MOHSA60005_D_4_C10 MOHSA60005_D_7_C10 MOHSAS60005_D_E06 PFA0002_A_4_A01 PFA0002_A_1_A01	pL1L2_GT0_DelLacZ_bsd L1L2_gt0	2	11
MGI:1859314	Barhl2	5	-	45064	FALSE	Conditional Ready	Promotorless	KOMP-CSD	PCS00055_A_B04	PG00055_A_1_C06 PG00055_A_3_B04 PG00055_A_7_B04 PG00055_A_1_B04 PGS00055_A_B04 PG00055_A_8_B04 PG00055_A_2_B04 PG00055_A_4_B04 PG00055_A_5_B04 PGS00055_B_B04	L1L2_gt2 L1L2_gt1	1	10
MGI:1309478	Baz1a	12	-	187654	FALSE	Conditional Ready	Promotorless	EUCOMM	PCTS00149_A_D07	PLNS50001_D_E01	L1L2_gt2	1	1
MGI:1353499	Baz1b	5	+	39975	TRUE	Conditional Ready	Promotorless	KOMP-CSD	PCS00019_A_G02	PG00019_A_4_G02 PGS00019_A_G02 PG00019_A_2_G02 PG00019_A_3_G02 MOHFA50001_D_5_G05 MOHFA50001_D_1_G05 PLNS50001_D_B03	L1L2_gt2	1	7
MGI:1353499	Baz1b	5	+	47355	FALSE	Conditional Ready	Promotorless	KOMP-CSD	PCS00013_A_H02	PGS00013_A_A12	L1L2_gt1	1	1
MGI:1918742	Bbs7	3	-	33836	FALSE	Conditional Ready	Promotorless	EUCOMM	PCS00044_A_D12	PGS00044_A_D12 PG00044_A_6_D12	L1L2_gt2	1	2
MGI:1917758	Bbx	16	-	39696	TRUE	Conditional Ready	Promotorless	EUCOMM	PCS00019_A_D01	PG00019_A_1_D01 PG00019_A_3_D01 PG00019_A_4_D01 PGS00019_A_D01 PG00019_A_2_D01	L1L2_gt0	1	5
MGI:2385132	BC005624	2	-	34246	FALSE	Conditional Ready	Promotorless	KOMP-CSD	PCS00027_A_A11	PG00027_B_3_A11 PGS00027_A_A11	L1L2_gt2	1	2
MGI:2384959	BC017643	11	-	43764	FALSE	Conditional Ready	Promotorless	KOMP-CSD	PCS00045_A_C07	PG00045_B_3_C07 PG00045_A_7_C07 PG00045_B_2_C07 PGS00045_D_C07 PG00045_A_5_C07 PG00045_B_4_C07 PGS00045_A_C07 PG00045_D_1_C07 PG00045_B_1_C07 PG00045_D_2_C07 PG00045_A_6_C07 PG00045_D_3_C07	L1L2_gt1	1	12
MGI:2448516	BC026585	1	+	41750	FALSE	Conditional Ready	Promotorless	KOMP-CSD	PCS00031_A_D02	PGS00031_A_D02 PG00031_B_1_D02 PG00031_A_16_D01 PG00031_A_16_D02 PG00031_B_4_D01	L1L2_gt0	1	5
MGI:3039605	BC053393	11	+	37731	FALSE	Conditional Ready	Promotorless	KOMP-CSD	PCS00028_A_B06	PG00028_B_2_B06 PGS00028_A_B06 PG00028_B_4_B06	L1L2_st0	1	3
MGI:1913415	Bccip	7	+	44067	FALSE	Conditional Ready	Promotorless	EUCOMM	PCS00047_A_D07	PG00047_A_4_D06 PGS00047_A_D07 PG00047_A_2_D07	L1L2_gt0	1	3
MGI:894278	Bche	3	-	44968	TRUE	Conditional Ready	Promotorless	KOMP-CSD	PCS00052_A_A12	PG00052_A_6_A12 PGS00052_A_A12 PG00052_A_8_A12	L1L2_st0	1	3
MGI:1914063	Bcl2l14	6	+	43576	FALSE	Conditional Ready	Promotorless	EUCOMM	PCS00047_A_C09	PG00047_A_1_C09 PG00047_A_4_C09 PGS00047_A_C09 PG00047_A_2_C09	L1L2_gt0	1	4
MGI:1918708	Bcor	X	-	44090	FALSE	Conditional Ready	Promotorless	EUCOMM	PCS00046_A_D09	PG00046_A_1_D09 PG00046_A_2_D09 PG00046_A_3_D09 PG00046_A_4_D09 PGS00046_A_D09 MPGS8002_A_G01	L1L2_gt2	1	6
MGI:1914871	Bend5	4	+	41481	FALSE	Conditional Ready	Promotorless	KOMP-CSD	PCS00028_A_B01	PG00028_B_2_B01 PG00028_B_3_B01 PGS00028_A_B01 PG00028_B_4_B01	L1L2_gt0	1	4
MGI:2443100	Bend7	2	+	39227	FALSE	Conditional Ready	Promotorless	EUCOMM	PCS00043_A_G12	PG00043_A_2_G12 PG00043_A_3_G12 PGS00043_A_G12	L1L2_gt1	1	3
MGI:1933388	Bicc1	10	-	43183	FALSE	Conditional Ready	Promotorless	KOMP-CSD	PCS00045_A_C04	PG00045_A_5_C04 PG00045_D_1_C04 PG00045_D_4_C04 PGS00045_D_C04 PG00045_A_8_C04 PG00045_D_3_C04 PGS00045_A_C04 PG00045_B_3_C04 PG00045_A_7_C04 PG00045_A_6_C04 PG00045_D_2_C04	L1L2_gt1	1	11
MGI:88170	Blvra	2	+	28475	FALSE	Conditional Ready	Promotorless	EUCOMM	PCS00008_A_C07	PG00008_A_4_C07	L1L2_gt0	1	1
MGI:2155456	Bmp2k	5	+	40503	FALSE	Conditional Ready	Promotorless	EUCOMM	PCS00030_B_H03	PG00030_B_1_H03 PGS00030_B_H03	L1L2_gt1	1	2
MGI:88181	Bmp5	9	+	40549	FALSE	Conditional Ready	Promotorless	EUCOMM	PCS00030_B_H02	PG00030_B_2_H02 PG00030_B_3_H02 PG00030_B_4_H02 PG00030_C_2_H02 PG00030_C_3_H02 PG00030_C_4_H02 PGS00030_C_H02 PGS00030_B_H02	L1L2_st1	1	8
MGI:1101778	Bmx	X	-	40596	TRUE	Conditional Ready	Promotorless	EUCOMM	PCS00032_A_D12	PG00032_A_1_D12	L1L2_gt0	1	1
MGI:2443805	Bnc2	4	-	36299	FALSE	Conditional Ready	Promotorless	KOMP-CSD	PCS00023_E_G02	PGS00023_E_G02 PG00023_D_1_F02 PG00023_D_1_G02 PG00023_D_4_F02 PG00023_E_1_G02 PG00023_C_1_G02 PG00023_D_2_G02 PG00023_E_2_G02 PG00023_E_4_G01 PG00023_C_4_G02 PG00023_E_3_G02 PG00023_C_3_G02 PG00023_D_3_G02 PG00023_D_4_G02 PG00023_E_4_G02 PGS00023_A_G02	L1L2_gt0	1	16
MGI:1332659	Bnip3l	14	-	42219	TRUE	Conditional Ready	Promotorless	EUCOMM	PCS00037_A_H05	PG00037_A_1_H05 PG00037_A_3_H05 PG00037_A_4_H05 PGS00037_A_H05 PG00037_A_2_H05	L1L2_gt1	1	5
MGI:2151153	Boc	16	-	44231	FALSE	Conditional Ready	Promotorless	KOMP-CSD	PCS00049_A_C12	PG00049_A_2_C12 PGS00049_A_C12 PGS00049_B_C12 PG00049_A_4_C12	L1L2_st1	1	4
MGI:1916806	Bod1	11	-	37643	FALSE	Conditional Ready	Promotorless	KOMP-CSD	PCS00020_A_A04	PG00020_A_4_A04 PG00020_A_2_A04 PGS00020_A_A04	L1L2_gt0	1	3
MGI:2444804	Bod1l	5	-	177736	FALSE	Conditional Ready	Promotorless	EUCOMM	PCS00140_C_B02 PCS00140_A_B02	MOHSAS60005_D_F01 MOHSA60005_D_5_E01 MOHSA60005_D_3_E01 MOHSA60005_D_4_E01 MOHSA60005_D_4_C11 MOHSA60005_D_3_C12 MOHSAS60005_D_F08 MOHSA60005_D_2_E01 MOHSA60005_D_1_C12 MOHSA60005_D_8_C12 MOHSA60005_D_6_C12 MOHSAS60005_D_F05 MOHSAS60005_D_F03 MOHSA60005_D_7_C11 MOHSA60005_D_2_C12 MOHSA60005_D_1_E01 MOHSA60005_D_2_C11 MOHSA60005_D_5_C11 MOHSA60005_D_3_C11 MOHSA60005_D_8_C11 MOHSA60005_D_4_C12 MOHS…	pL1L2_GT2_DelLacZ_bsd	3	32
MGI:2137431	Bpifb1	2	+	35369	FALSE	Conditional Ready	Promotorless	KOMP-CSD	PCS00021_A_C08	PGS00021_A_C08 PG00021_A_2_C08	L1L2_gt0	1	2
MGI:2685852	Bpifb4	2	+	42143	FALSE	Conditional Ready	Promotorless	KOMP-CSD	PCS00036_A_B10	PG00036_A_3_B10 PGS00036_A_B10	L1L2_gt2	1	2
MGI:2684965	Bpifb6	2	+	44848	FALSE	Conditional Ready	Promotorless	KOMP-CSD	PCS00052_A_B11	PG00052_A_7_B11 PGS00052_A_B11 PG00052_A_8_B11	L1L2_st2	1	3
MGI:99495	Brd2	17	-	39699	FALSE	Conditional Ready	Promotorless	EUCOMM	PCS00019_A_H10	MOHFA50001_D_2_G06 MOHFA50001_D_1_G06 MOHFA50001_D_7_G07 MOHFA50001_D_5_G06 MOHFA50001_D_4_G06 PG00019_A_2_H10 PG00019_A_3_H10 PG00019_A_4_H10 PG00019_A_1_H10 PGS00019_A_H10	L1L2_gt2	1	10
MGI:1914632	Brd3	2	-	34188	FALSE	Conditional Ready	Promotorless	EUCOMM	PCS00056_A_G04	PLNS50001_D_A03 MOHFA50001_D_3_H02	L1L2_gt2	1	2
MGI:1888520	Brd4	17	-	48673	FALSE	Conditional Ready	Promotorless	EUCOMM	PCS00068_A_H04	MOHFA50001_D_1_B08	L1L2_gt0	1	1
MGI:1349766	Brd7	8	-	39614	FALSE	Conditional Ready	Promotorless	EUCOMM	PCS00001_A_C12	PGS00001_A_C12	L1L2_gt2	1	1
MGI:1349766	Brd7	8	-	39701	FALSE	Conditional Ready	Promotorless	EUCOMM	PCS00019_A_D06	PG00019_A_1_D06 PG00019_A_2_D06 PG00019_A_4_D06 PGS00019_A_D06 PG00019_A_3_D06 MOHFA50001_D_5_A04 MOHFA50001_D_8_A04 MOHFA50001_D_3_A04 MOHFA50001_D_1_A04 MOHFA50001_D_6_A04 MOHFA50001_D_2_A04 MOHFA50001_D_4_A04 PLNS50001_D_A08	L1L2_gt0	1	13
MGI:1925906	Brd8	18	-	39779	FALSE	Conditional Ready	Promotorless	EUCOMM	PCS00019_A_H09	PG00019_A_1_H09 PG00019_A_3_H09 PG00019_A_4_H09 PGS00019_A_H09	L1L2_gt1	1	4
MGI:1891374	Brdt	5	+	39781	FALSE	Conditional Ready	Promotorless	EUCOMM	PCS00018_A_E04	MOHSA60005_D_2_H09 MOHSA60005_D_7_H09 MOHSA60005_D_4_H09	pL1L2_GT0_DelLacZ_bsd	1	3
MGI:1891374	Brdt	5	+	44475	FALSE	Conditional Ready	Promotorless	EUCOMM	PCP10002_A_F09	PFA0002_A_4_F09	L1L2_gt0	1	1
MGI:1333875	Bre	5	+	42215	FALSE	Conditional Ready	Promotorless	EUCOMM	PCS00037_A_F08	PG00037_A_1_F08 PG00037_A_2_F08 PGS00037_A_F08	L1L2_gt2	1	3
MGI:1928478	Brinp1	4	-	22	FALSE	Conditional Ready	Promotorless	EUCOMM	PCS00006_A_A06	PG00006_A_2_A06 PG00006_A_3_A06 PGS00006_A_A06 PG00006_A_4_A06	L1L2_gt2	1	4
MGI:2443035	Brinp3	1	+	42551	FALSE	Conditional Ready	Promotorless	KOMP-CSD	PCS00041_A_E12	PGS00041_A_E12 PG00041_A_4_E12	L1L2_st2	1	2
MGI:1926033	Brpf1	6	+	43377	FALSE	Conditional Ready	Promotorless	EUCOMM	PCS00046_A_G08	PG00046_A_2_G08 PGS00046_A_G08 PLNS50001_D_C01 MOHFA50001_D_5_G12 MOHFA50001_D_7_G12 MOHFA50001_D_3_G12 MOHFA50001_D_1_G12 MOHFA50001_D_6_G12	L1L2_gt2	1	8
MGI:2146836	Brpf3	17	+	39782	TRUE	Conditional Ready	Promotorless	EUCOMM	PCS00019_A_A04	PLNS50001_D_A09 MOHFA50001_D_3_A05 MOHFA50001_D_1_A05 MOHFA50001_D_5_A05 MOHFA50001_D_7_A05 PLBS60002_B_B07 PLB60002_B_1_A06 PLB60002_B_3_A06 PLB60002_B_4_A06 PG00019_A_2_A04 PG00019_A_3_A04 PG00019_A_4_A04 PGS00019_A_A04	L1L2_gt0 pL1L2_GT0_DelLacZ_bsd	1	13
MGI:3029414	Brwd3	X	-	50273	FALSE	Conditional Ready	Promotorless	EUCOMM	PCS00073_A_A04	MOHFA50001_D_1_C01 PLNS50001_D_C08 MOHFA50001_D_2_C01	L1L2_gt0	1	3
MGI:1277955	Bsn	9	-	42644	FALSE	Conditional Ready	Promotorless	EUCOMM	PCS00037_A_F09	PG00037_A_3_F09 PGS00037_A_F09	L1L2_gt2	1	2
MGI:2153465	Bsnd	4	-	36500	FALSE	Conditional Ready	Promotorless	KOMP-CSD	PCS00021_A_E05	PGS00021_A_E05 PG00021_C_3_E05 PG00021_C_1_E05 PG00021_C_2_E05 PG00021_C_4_E05 PGS00021_B_E05	L1L2_gt0 L1L2_st0	1	6
MGI:2177191	Bspry	4	+	46544	FALSE	Conditional Ready	Promotorless	EUCOMM	PCS00062_A_E07	PG00062_A_1_E07 PG00062_A_2_E07 PG00062_A_3_E07 PG00062_A_4_E07 PGS00062_A_E07	L1L2_gt0	1	5
MGI:105370	Bst1	5	+	45078	FALSE	Conditional Ready	Promotorless	KOMP-CSD	PCS00055_A_F12	PGS00055_B_F12 PGS00055_A_F12 PG00055_A_5_F12 PG00055_A_2_F12	L1L2_st2	1	4
MGI:1915312	Btf3l4	4	-	39140	FALSE	Conditional Ready	Promotorless	EUCOMM	PCS00042_A_E01	PG00042_A_1_E01 PG00042_A_1_F01 PG00042_A_2_E01 PG00042_A_2_F01 PG00042_A_4_E01 PGS00042_A_E01 PG00042_A_3_E01 PG00042_A_4_F01	L1L2_gt0	1	8
MGI:1100510	Bub1	2	-	35125	TRUE	Conditional Ready	Promotorless	KOMP-CSD	PCS00023_E_D07	PG00023_E_1_D07 PGS00023_E_D07	L1L2_gt0	1	2
MGI:2450877	Bzrap1	11	+	65	FALSE	Conditional Ready	Promotorless	EUCOMM	PCS00004_A_C01	PG00004_A_1_C01 PG00004_A_1_C02 PG00004_A_2_C01 PG00004_A_3_C01 PG00004_A_3_C02 PGS00004_A_C01 PG00004_A_4_C01	L1L2_gt0	1	7
MGI:3045359	C130073F10Rik	4	-	43437	FALSE	Conditional Ready	Promotorless	KOMP-CSD	PCS00045_A_D06	PGS00045_A_D06 PG00045_B_2_D06 PG00045_B_3_D06 PG00045_B_1_D06 PGS00045_D_D06 PG00045_B_4_D06	L1L2_gt2	1	6
MGI:1194505	C1qbp	11	-	326	FALSE	Conditional Ready	Promotorless	EUCOMM	PCS00006_A_E09 PCS00016_A_E09	PG00006_A_3_E01 PG00006_A_4_E01 PGS00006_A_E01 PG00016_B_2_E09 PG00016_B_4_E09 PGS00016_A_E09 PG00016_B_1_E09 PG00016_B_3_E09	L1L2_gt2 L1L2_st2	2	8
MGI:1919254	C1qtnf1	11	+	41202	FALSE	Conditional Ready	Promotorless	KOMP-CSD	PCS00027_A_G07	GR00031_B06	L1L2_st2	1	1
MGI:1919959	C1qtnf6	15	-	40272	FALSE	Conditional Ready	Promotorless	EUCOMM	PCS00029_A_H07	PG00029_A_3_H07 PG00029_A_4_H07 PGS00029_A_H07	L1L2_st0	1	3
MGI:2660692	C1rl	6	+	43729	FALSE	Conditional Ready	Promotorless	EUCOMM	PCS00054_B_A06	PG00054_A_4_A06 PGS00054_A_A06	L1L2_gt2	1	2
MGI:2668347	C8a	4	-	450	FALSE	Conditional Ready	Promotorless	EUCOMM	PCS00007_A_B06	PG00007_B_1_B06 PGS00007_A_B06	L1L2_gt0	1	2
MGI:1915020	Caap1	4	-	431	FALSE	Conditional Ready	Promotorless	EUCOMM	PCS00007_A_C05	PG00007_B_1_C05 PG00007_B_2_C05 PGS00007_A_C05 PG00007_B_3_C05	L1L2_gt0	1	4
MGI:2444177	Cachd1	4	+	36438	FALSE	Conditional Ready	Promotorless	KOMP-CSD	PCS00045_A_E07	PG00045_B_1_E07 PG00045_B_3_E07 PG00045_D_1_E07 PG00045_A_5_E07 PGS00045_D_E07 PG00045_B_2_E07 PGS00045_A_E07 PG00045_B_4_E07	L1L2_gt2	1	8
MGI:894644	Cacnb2	2	+	39259	TRUE	Conditional Ready	Promotorless	EUCOMM	PCS00042_A_C11	PG00042_A_2_C11 PG00042_A_3_C11 PGS00042_A_C11	L1L2_gt0	1	3
MGI:103301	Cacnb4	2	-	27003	FALSE	Conditional Ready	Promotorless	EUCOMM	PCS00008_A_H01	PG00008_A_4_H01 PGS00008_A_H01	L1L2_gt0	1	2
MGI:1889272	Cadm1	9	+	45867	FALSE	Conditional Ready	Promotorless	EUCOMM	PCS00060_A_D12	PG00060_A_1_D12 PG00060_A_2_D12 PG00060_A_3_D12 PG00060_A_4_D12 PGS00060_A_D12	L1L2_st1	1	5
MGI:1918463	Cage1	13	-	41775	FALSE	Conditional Ready	Promotorless	EUCOMM	PCS00032_A_D01	PG00032_A_1_D01 PG00032_A_2_D01 PGS00032_A_D01	L1L2_gt0	1	3
MGI:88250	Cald1	6	+	37365	FALSE	Conditional Ready	Promotorless	KOMP-CSD	PCS00023_E_D05	PG00023_E_1_D05 PG00023_E_2_D05 PG00023_E_4_D05 PGS00023_E_D05 PG00023_E_3_D05	L1L2_gt0	1	5
MGI:88251	Calm1	12	+	42039	FALSE	Conditional Ready	Promotorless	EUCOMM	PCS00037_A_A05	PG00037_A_1_A05 PGS00037_A_A05	L1L2_gt0	1	2
MGI:2442190	Camk1d	2	-	41883	FALSE	Conditional Ready	Promotorless	EUCOMM	PCS00032_A_D08	PG00032_A_1_D08 PGS00032_A_D08	L1L2_gt2	1	2
MGI:88257	Camk2b	11	-	40351	FALSE	Conditional Ready	Promotorless	EUCOMM	PCS00030_B_F12	PG00030_B_2_F12 PG00030_B_3_F12 PG00030_B_4_F12 PGS00030_B_F12	L1L2_gt2	1	4
MGI:1341265	Camk2d	3	+	42148	FALSE	Conditional Ready	Promotorless	KOMP-CSD	PCS00036_A_F06	PGS00036_A_F06 PG00036_A_1_F06 PG00036_A_4_F06 PG00036_A_2_F06	L1L2_gt1	1	4
MGI:3036242	Camsap1	2	-	39312	FALSE	Conditional Ready	Promotorless	EUCOMM	PCS00042_A_G09	PG00042_A_3_H09 PG00042_A_4_H09 PGS00042_A_G09	L1L2_gt0	1	3
MGI:88262	Cap1	4	-	480	FALSE	Conditional Ready	Promotorless	EUCOMM	PCS00007_A_H11	PG00007_B_1_H11 PG00007_B_3_H11 PG00007_B_4_H11 PGS00007_A_H11	L1L2_gt1	1	4
MGI:1344392	Capn10	1	+	44789	FALSE	Conditional Ready	Promotorless	KOMP-CSD	PCS00052_A_E01	PGS00052_A_E01 PG00052_A_8_E01 PG00052_A_6_E01 PG00052_A_7_E01 PG00052_A_5_E01	L1L2_gt0	1	5
MGI:107437	Capn3	2	+	39441	FALSE	Conditional Ready	Promotorless	EUCOMM	PCS00011_A_H04	PG00011_A_2_H04 PGS00011_A_H04	L1L2_gt0	1	2
MGI:1338030	Capn7	14	+	45933	FALSE	Conditional Ready	Promotorless	EUCOMM	PCS00062_A_H02	PG00062_A_1_H02 PG00062_A_2_H02 PG00062_A_4_H02 PGS00062_A_H02	L1L2_gt1	1	4
MGI:2448541	Caprin2	6	-	42858	FALSE	Conditional Ready	Promotorless	EUCOMM	PCS00047_A_F01	PG00047_A_2_F01 PGS00047_A_F01 PG00047_A_1_F01	L1L2_gt0	1	3
MGI:2441980	Caps2	10	+	42388	FALSE	Conditional Ready	Promotorless	KOMP-CSD	PCS00036_A_F04	PG00036_A_4_F04 PGS00036_A_F04 PG00036_A_2_F04 PG00036_A_1_F04 PG00036_A_3_F04	L1L2_gt0	1	5
MGI:106227	Capza1	3	-	41316	FALSE	Conditional Ready	Promotorless	EUCOMM	PCS00033_A_B03	PG00033_A_1_B03 PG00033_A_2_B03 PG00033_A_3_B03 PGS00033_A_B03	L1L2_gt1	1	4
MGI:106222	Capza2	6	+	37293	FALSE	Conditional Ready	Promotorless	KOMP-CSD	PCS00023_E_E08	PG00023_E_2_E08 PGS00023_E_E08 PG00023_E_3_E08 PG00023_E_4_E08	L1L2_gt0	1	4
MGI:1923709	Car12	9	+	43876	FALSE	Conditional Ready	Promotorless	KOMP-CSD	PCS00045_A_B12	PG00045_A_5_B12 PG00045_B_1_B12 PG00045_D_2_B12 PG00045_D_3_B12 PGS00045_D_B12 PG00045_A_4_B12 PG00045_B_2_B12 PG00045_A_1_B12 PG00045_A_7_B12 PG00045_A_8_B12 PGS00045_A_B12 PG00045_A_3_B12 PG00045_D_1_B12 PG00045_A_3_A11 PG00045_A_6_B12 PG00045_B_3_B12 PG00045_B_4_B12 PG00045_A_4_A11	L1L2_st1	1	18
MGI:1333786	Car6	4	-	46959	FALSE	Conditional Ready	Promotorless	EUCOMM	PCS00064_A_H10	PG00064_A_4_H10 PGS00064_A_H10	L1L2_st1	1	2
MGI:88253	Car8	4	-	166	FALSE	Conditional Ready	Promotorless	EUCOMM	PCS00005_A_D09	PG00005_A_2_D09 PG00005_A_3_D09 PG00005_A_4_D09 PGS00005_A_D09	L1L2_gt1	1	4
MGI:2386258	Card14	11	+	157	FALSE	Conditional Ready	Promotorless	EUCOMM	PCS00005_A_D07	PG00005_A_1_D07 PG00005_A_2_D07 PG00005_A_3_D07 PG00005_A_4_D07 PGS00005_A_D07	L1L2_gt1	1	5
MGI:2182269	Carf	1	+	41567	FALSE	Conditional Ready	Promotorless	KOMP-CSD	PCS00028_A_A02	PGS00028_A_A02 PG00028_B_3_A02	L1L2_gt0	1	2
MGI:1915982	Carmil1	13	-	44238	FALSE	Conditional Ready	Promotorless	KOMP-CSD	PCS00049_A_D01	PG00049_A_6_D01 PG00049_A_2_D01 PG00049_A_4_D01 PGS00049_B_D01 PG00049_A_5_D02 PG00049_A_8_D01 PG00049_A_3_D01 PGS00049_A_D01	L1L2_gt0	1	8
MGI:2444480	Casc1	6	-	43454	FALSE	Conditional Ready	Promotorless	EUCOMM	PCS00051_A_B05	PG00051_A_1_B05 PG00051_A_2_B05 PGS00051_A_B05	L1L2_gt1	1	3
MGI:1277950	Casp9	4	+	545	TRUE	Conditional Ready	Promotorless	EUCOMM	PCS00007_A_F08	PGS00007_A_F08	L1L2_gt0	1	1
MGI:3043288	Catsper4	4	-	36872	FALSE	Conditional Ready	Promotorless	KOMP-CSD	PCS00027_A_G11	PGS00027_A_G11 PG00027_B_1_G11	L1L2_gt2	1	2
MGI:105369	Cbx1	11	+	39792	FALSE	Conditional Ready	Promotorless	EUCOMM	PCS00019_A_B11	PG00019_A_1_B11 PG00019_A_2_B11 PG00019_A_3_B11 PG00019_A_4_B11 PGS00019_A_B11	L1L2_gt2	1	5
MGI:108515	Cbx3	6	+	45407	FALSE	Conditional Ready	Promotorless	EUCOMM	PCS00069_B_F06	MOHSA60005_D_6_D05 MOHSA60005_D_7_D05 MOHSA60005_D_1_D05 MOHSA60005_D_3_D06 MOHSA60005_D_2_D06 MOHSAS60005_D_B12 MOHSAS60005_D_B11 MOHSAS60005_D_C01 MOHSA60005_D_4_D06 MOHSA60005_D_7_D06	pL1L2_GT2_DelLacZ_bsd	1	10
MGI:1196439	Cbx7	15	-	42029	FALSE	Conditional Ready	Promotorless	KOMP-CSD		MOHSA60005_D_6_G08 MOHSA60005_D_4_G05 MOHSAS60005_D_C05 MOHSAS60005_D_B07 MOHSA60005_D_7_H12 MOHSAS60005_D_B08 MOHSA60005_D_4_G08 MOHSAS60005_D_B09 MOHSA60005_D_1_G08 MOHSA60005_D_8_G08 MOHSAS60005_D_B10	pL1L2_GT2_DelLacZ_bsd	1	11
MGI:1196439	Cbx7	15	-	47354	FALSE	Conditional Ready	Promotorless	KOMP-CSD	PCS00013_A_H04	PGS00013_A_B01	L1L2_gt2	1	1
MGI:2443076	Cc2d1b	4	+	36572	FALSE	Conditional Ready	Promotorless	KOMP-CSD	PCS00021_A_H05	PG00021_A_2_H05 PGS00021_B_H05 PGS00021_A_H05 PG00021_B_4_H05 PG00021_B_2_H05 PG00021_B_3_H05	L1L2_gt0 L1L2_st0	1	6
MGI:1920543	Ccdc103	11	+	43210	FALSE	Conditional Ready	Promotorless	KOMP-CSD	PCS00045_A_A03	PG00045_A_5_A03 PGS00045_D_A03 PG00045_D_4_A03 PG00045_D_1_A03 PG00045_D_2_A03 PG00045_A_6_A03 PG00045_A_8_A03 PG00045_A_7_A03 PG00045_D_3_A03	L1L2_gt0	1	9
MGI:1914541	Ccdc137	11	+	41849	FALSE	Conditional Ready	Promotorless	KOMP-CSD	PCS00031_A_C10	PG00031_B_4_C10 PGS00031_A_C10	L1L2_gt1	1	2
MGI:2444555	Ccdc158	5	-	43223	TRUE	Conditional Ready	Promotorless	KOMP-CSD	PCS00045_A_G01	PG00045_A_6_G01 PG00045_A_7_G01 PG00045_B_3_G01 PG00045_A_5_G01 PG00045_D_2_G01 PGS00045_A_G01 PG00045_D_1_G01 PG00045_D_3_G01 PGS00045_D_G01 PG00045_B_1_G01	L1L2_gt0	1	10
MGI:1922152	Ccdc171	4	+	38	FALSE	Conditional Ready	Promotorless	EUCOMM	PCS00004_A_B06	PG00004_A_1_B06 PG00004_A_2_B06 PG00004_A_3_B06 PG00004_A_4_B06 PGS00004_A_B06	L1L2_gt0	1	5
MGI:1924308	Ccdc183	2	-	43127	FALSE	Conditional Ready	Promotorless	KOMP-CSD	PCS00041_A_D02	PGS00041_A_D02 PG00041_A_2_D02 PG00041_A_1_D02 PG00041_A_3_D02	L1L2_gt0	1	4
MGI:1859608	Ccdc22	X	-	40528	FALSE	Conditional Ready	Promotorless	EUCOMM	PCS00033_A_H11	PG00033_A_1_H11 PG00033_A_2_H11 PG00033_A_4_H11 PGS00033_A_H11	L1L2_gt1	1	4
MGI:1921436	Ccdc3	2	+	39231	FALSE	Conditional Ready	Promotorless	EUCOMM	PCS00026_B_F10	PG00026_A_1_F10 PG00026_A_2_F10 PG00026_A_3_F10 PG00026_A_4_F10 PGS00026_A_F10 PGS00026_B_F10	L1L2_st2	1	6
MGI:1918526	Ccdc57	11	-	162	FALSE	Conditional Ready	Promotorless	EUCOMM	PCS00016_A_C11 PCS00006_A_C11	PG00016_B_4_C11 PGS00006_A_C05 PGS00016_A_C11	L1L2_gt2	2	3
MGI:1914450	Ccdc77	6	-	42450	FALSE	Conditional Ready	Promotorless	EUCOMM	PCS00038_A_G08	PG00038_A_1_G08 PG00038_A_3_G08 PG00038_A_4_G08 PGS00038_A_G08 PG00038_A_2_G08	L1L2_gt2	1	5
MGI:1918134	Ccdc81	7	-	47107	TRUE	Conditional Ready	Promotorless	EUCOMM	PCS00064_A_D02	PG00064_A_1_D02 PG00064_A_3_D02 PG00064_A_4_D02 PGS00064_A_D02	L1L2_gt0	1	4
MGI:2445069	Ccdc85a	11	-	234	FALSE	Conditional Ready	Promotorless	EUCOMM	PCS00034_A_F06	PG00034_A_4_C07 PG00034_A_6_C07 PG00034_A_7_C07 PGS00034_A_F06 PG00034_A_5_C07	L1L2_gt0	1	5
MGI:98261	Ccl4	11	+	44556	TRUE	Conditional Ready	Promotorless	KOMP-CSD	PCS00049_A_E12	PG00049_A_1_E12 PG00049_A_2_E12 PG00049_A_3_E12 PG00049_A_4_E12 PG00049_A_8_E12 PGS00049_A_E12 PGS00049_B_E12	L1L2_st1	1	7
MGI:2384924	Ccm2	11	+	217	FALSE	Conditional Ready	Promotorless	EUCOMM	PCS00035_A_E06	PG00035_A_1_E06 PG00035_A_2_E06 PG00035_A_3_E06 PG00035_A_4_E06 PGS00035_A_E06	L1L2_gt1	1	5
MGI:2385159	Ccm2l	2	+	35348	TRUE	Conditional Ready	Promotorless	KOMP-CSD	PCS00052_A_H03	PGS00052_A_H03 PG00052_A_6_H03 PG00052_A_5_H03 PG00052_A_7_H03	L1L2_gt1	1	4
MGI:2685134	Ccnb1ip1	14	-	87547	FALSE	Conditional Ready	Promotorless	EUCOMM	PCS00106_A_F03	MOHSA60005_D_6_H09	pL1L2_GT0_DelLacZ_bsd	1	1
MGI:1858199	Ccnc	4	+	186	FALSE	Conditional Ready	Promotorless	EUCOMM	PCS00006_A_D01 PCS00016_A_D01	PG00006_A_1_C07 PG00006_A_3_C07 PGS00006_A_C07 PG00016_B_1_D01 PG00016_B_2_D01 PG00016_B_4_D01 PGS00016_A_D01	L1L2_gt2	2	7
MGI:102890	Ccng1	11	-	43957	FALSE	Conditional Ready	Promotorless	EUCOMM	PCS00047_A_D08	PGS00047_A_D08 PG00047_A_1_D08 PG00047_A_2_D08 PG00047_A_4_D08	L1L2_gt0	1	4
MGI:1927119	Ccnl2	4	+	44566	FALSE	Conditional Ready	Promotorless	EUCOMM	PCS00054_B_G07	PG00054_A_2_G07 PG00054_A_2_G08 PG00054_A_3_G07 PG00054_A_4_G07 PG00054_A_4_G08 PGS00054_A_G07	L1L2_gt2	1	6
MGI:1860383	Cd160	3	-	41190	FALSE	Conditional Ready	Promotorless	EUCOMM	PCS00033_A_E06	PG00033_A_3_E06 PGS00033_A_E06	L1L2_st1	1	2
MGI:2442359	Cd300lf	11	-	43867	FALSE	Conditional Ready	Promotorless	KOMP-CSD	PCS00045_A_H11	PG00045_D_3_H10 PGS00045_D_H11 PG00045_B_4_H11 PG00045_D_2_H10 PG00045_A_6_H10 PG00045_B_3_H11 PG00045_A_7_H10 PG00045_D_4_H10 PGS00045_A_H11 PG00045_A_8_H10 PG00045_B_2_H11 PG00045_B_1_H11	L1L2_st1	1	12
MGI:1289168	Cd300lg	11	+	41201	FALSE	Conditional Ready	Promotorless	KOMP-CSD	PCS00027_A_E04	GR00030_D10	L1L2_st1	1	1
MGI:104651	Cd82	2	-	39374	FALSE	Conditional Ready	Promotorless	EUCOMM	PCS00042_A_D11	PG00042_A_1_D11 PG00042_A_2_D11 PG00042_A_4_D11 PGS00042_A_D11	L1L2_st0	1	4
MGI:2442676	Cdc14a	3	-	47441	TRUE	Conditional Ready	Promotorless	EUCOMM	PCS00063_A_A09	PG00063_B_1_A09 PGS00063_A_A09	L1L2_gt2	1	2
MGI:1913690	Cdc26	4	-	47168	TRUE	Conditional Ready	Promotorless	EUCOMM	PCS00064_A_H04	PG00064_A_1_H04 PG00064_A_2_H04 PG00064_A_4_H04 PGS00064_A_H04 PG00064_A_3_H04	L1L2_gt0	1	5
MGI:106211	Cdc42	4	-	536	FALSE	Conditional Ready	Promotorless	EUCOMM	PCS00017_A_C08	PG00017_B_2_C08 PG00017_B_3_C08 PG00017_B_4_C08 PGS00017_A_C08	L1L2_gt0	1	4
MGI:1889510	Cdc42se1	3	+	41397	TRUE	Conditional Ready	Promotorless	EUCOMM	PCS00032_A_H05	PG00032_A_2_H05 PG00032_A_3_H05 PG00032_A_4_H05 PGS00032_A_H05	L1L2_gt0	1	4
MGI:1315198	Cdca3	6	+	42769	TRUE	Conditional Ready	Promotorless	EUCOMM	PCS00047_A_B01	PG00047_A_2_B01 PG00047_A_4_B01 PGS00047_A_B01 PG00047_A_1_B01	L1L2_gt0	1	4
MGI:1915099	Cdca5	19	+	47150	FALSE	Conditional Ready	Promotorless	EUCOMM	PCS00063_A_D02	PG00063_B_4_D02 PGS00063_A_D02	L1L2_gt0	1	2
MGI:1196274	Cdca8	4	-	36738	FALSE	Conditional Ready	Promotorless	KOMP-CSD	PCS00023_E_A12	PLBS60002_B_B04 PGS00023_A_A12 PGS00023_E_A12 PG00023_D_3_A12 PG00023_D_4_A12 PG00023_E_2_A12 PG00023_E_1_A12 PG00023_C_1_A12 PG00023_D_2_A12	pL1L2_GT1_DelLacZ_bsd L1L2_gt1	1	9
MGI:88354	Cdh1	8	+	39930	FALSE	Conditional Ready	Promotorless	EUCOMM	PCS00019_A_H06	PG00019_A_1_H07 PG00019_A_2_H07 PG00019_A_3_H06 PG00019_A_3_H07 PG00019_A_4_H07 PGS00019_A_H06 PG00019_A_1_H06 PG00019_A_4_H06	L1L2_st1	1	8
MGI:109503	Cdh12	15	+	43490	FALSE	Conditional Ready	Promotorless	KOMP-CSD	PCS00045_A_F08	PG00045_B_1_F08 PG00045_B_3_F08 PGS00045_D_F08 PGS00045_A_F08 PG00045_B_2_F08	L1L2_st0	1	5
MGI:88355	Cdh2	18	-	39522	FALSE	Conditional Ready	Promotorless	EUCOMM	PCS00043_A_D03	PG00043_A_4_D03 PGS00043_A_D03	L1L2_st0	1	2
MGI:1890219	Cdh23	10	-	40485	FALSE	Conditional Ready	Promotorless	EUCOMM	PCS00026_B_D01	PG00026_B_2_D01 PG00026_B_3_D01 PG00026_B_4_D01 PG00026_B_5_D01 PGS00026_B_D01	L1L2_st0	1	5
MGI:2685856	Cdh26	2	+	35701	FALSE	Conditional Ready	Promotorless	KOMP-CSD	PCS00021_A_G08	PGS00021_A_G08	L1L2_gt0	1	1
MGI:2442792	Cdh7	1	+	41527	FALSE	Conditional Ready	Promotorless	KOMP-CSD	PCS00028_A_G02	PGS00028_A_G02 PG00028_B_1_G02 PG00028_B_4_G02	L1L2_st0	1	3
MGI:107434	Cdh8	8	-	43691	FALSE	Conditional Ready	Promotorless	KOMP-CSD	PCS00045_A_F09	PG00045_B_4_F09 PGS00045_A_F09 PG00045_A_4_F09 PG00045_B_3_F09 PGS00045_D_F09	L1L2_st0	1	5
MGI:2388268	Cdkl3	11	+	47417	FALSE	Conditional Ready	Promotorless	EUCOMM	PCS00064_A_G03	PG00064_A_1_G03 PG00064_A_2_G03 PG00064_A_3_G03 PGS00064_A_G03	L1L2_gt0	1	4
MGI:105388	Cdkn2c	4	-	46372	FALSE	Conditional Ready	Promotorless	EUCOMM	PCS00060_A_G03	PGS00060_A_G03 PG00060_A_1_G03 PG00060_A_2_G03 PG00060_A_4_G03	L1L2_gt0	1	4
MGI:3606576	Cdnf	2	+	33935	FALSE	Conditional Ready	Promotorless	KOMP-CSD	PCS00020_A_C08	PG00020_A_1_C08	L1L2_st1	1	1
MGI:1332236	Cds2	2	+	35224	FALSE	Conditional Ready	Promotorless	KOMP-CSD	PCS00023_E_A06	PLB60002_B_3_A09 PLB60002_B_2_A09 PLB60002_B_4_A09 PLBS60002_B_B01 PLB60002_B_1_A09 PGS00023_A_A06 PG00023_E_2_A06 PG00023_C_2_A06 PG00023_E_3_A06 PG00023_C_4_A06 PG00023_D_1_A06 PG00023_E_4_A06 PG00023_D_4_A06 PG00023_C_1_A06 PG00023_D_2_A06 PGS00023_E_A06	pL1L2_GT0_DelLacZ_bsd L1L2_gt0	1	16
MGI:88362	Cdx4	X	+	40734	FALSE	Conditional Ready	Promotorless	EUCOMM	PCS00033_A_G09	PG00033_A_1_G09 PG00033_A_4_G09 PGS00033_A_G09	L1L2_gt1	1	3
MGI:2136976	Cecr5	6	-	41646	FALSE	Conditional Ready	Promotorless	KOMP-CSD	PCS00031_A_E08	PG00031_A_16_E08 PG00031_B_2_E08 PG00031_B_4_E08 PGS00031_A_E08 PG00031_A_15_E08 PG00031_B_3_E08 PG00031_B_1_E10 PG00031_A_14_E08 PG00031_B_1_E08	L1L2_gt2	1	9
MGI:95316	Cela2a	4	-	44267	FALSE	Conditional Ready	Promotorless	KOMP-CSD	PCS00048_A_H09	PG00048_A_1_H09 PGS00048_A_H09	L1L2_st0	1	2
MGI:3651647	Cela3a	4	-	39182	FALSE	Conditional Ready	Promotorless	EUCOMM	PCS00011_A_D06	PG00011_A_1_D06 PG00011_A_1_F09 PG00011_A_1_H08 PG00011_A_2_D06 PG00011_A_2_F09 PG00011_A_3_D06 PG00011_A_4_D06 PG00011_A_4_D07 PG00011_A_4_H08 PGS00011_A_D06	L1L2_gt1	1	10
MGI:1338822	Celf2	2	-	33634	FALSE	Conditional Ready	Promotorless	EUCOMM	PCS00011_A_A08 PCS00043_A_A08	PG00011_A_2_A08 PG00011_A_3_A08 PG00011_A_4_A08 PGS00011_A_A08 PG00043_A_3_A08 PG00043_A_4_A08 PGS00043_A_A08 PG00043_A_2_A08	L1L2_gt1	2	8
MGI:2443629	Cemip	7	-	43983	FALSE	Conditional Ready	Promotorless	KOMP-CSD	PCS00048_A_C10	PGS00048_A_C10 PG00048_A_3_C10 PG00048_A_1_C10 PG00048_A_4_C10 PG00048_A_2_C10	L1L2_st1	1	5
MGI:2684927	Cenpj	14	-	39937	FALSE	Conditional Ready	Promotorless	EUCOMM	PCS00019_A_G09	PGS00019_A_G09 PG00019_A_4_G09	L1L2_gt1	1	2
MGI:1920389	Cenpv	11	-	33803	FALSE	Conditional Ready	Promotorless	EUCOMM	PCS00044_A_G11	PG00044_A_5_G11 PGS00044_A_G11	L1L2_gt2	1	2
MGI:2139083	Cep152	2	-	39436	FALSE	Conditional Ready	Promotorless	EUCOMM	PCS00043_A_C03	PGS00043_A_C03 PG00043_A_4_C03	L1L2_gt0	1	2
MGI:1891414	Cep41	6	-	43763	FALSE	Conditional Ready	Promotorless	EUCOMM	PCS00051_A_E06	PG00051_A_1_E06 PG00051_A_4_E06 PGS00051_A_E06 PG00051_A_2_E06 PG00051_A_3_E06	L1L2_gt1	1	5
MGI:2443502	Cep95	11	+	142	FALSE	Conditional Ready	Promotorless	EUCOMM	PCS00005_A_C11	PG00005_A_1_C11 PG00005_A_2_C11 PG00005_A_3_C11 PG00005_A_4_C11 PGS00005_A_C11	L1L2_gt1	1	5
MGI:2148202	Ces1d	8	-	42913	FALSE	Conditional Ready	Promotorless	KOMP-CSD	PCS00041_A_F08	PGS00041_A_F08 PG00041_A_1_F08	L1L2_st0	1	2
MGI:95432	Ces1e	8	-	42908	FALSE	Conditional Ready	Promotorless	KOMP-CSD	PCS00041_A_B11	PG00041_A_2_B11 PGS00041_A_B11	L1L2_st2	1	2
MGI:2142687	Ces1f	8	-	42900	FALSE	Conditional Ready	Promotorless	KOMP-CSD	PCS00041_A_A11	PGS00041_A_A11 PG00041_A_1_A11	L1L2_st2	1	2
MGI:1916579	Cfap206	4	-	33834	FALSE	Conditional Ready	Promotorless	EUCOMM	PCS00042_A_G04	PG00042_A_2_H04 PG00042_A_3_H04 PGS00042_A_G04	L1L2_gt0	1	3
MGI:1913994	Cfap36	11	-	236	FALSE	Conditional Ready	Promotorless	EUCOMM	PCS00004_A_F07 PCS00034_A_F07	MOHSAS60005_D_A08 MOHSA60005_D_8_H07 MOHSA60005_D_4_H07 MOHSA60005_D_2_H07 MOHSAS60005_D_A06 MOHSAS60005_D_A10 MOHSAS60005_D_A01 MOHSAS60005_D_A12 MOHSAS60005_D_B02 MOHSAS60005_D_A07 MOHSA60005_D_1_H03 MOHSA60005_D_5_H03 MOHSA60005_D_5_G03 MOHSA60005_D_8_H06 MOHSA60005_D_1_H06 MOHSA60005_D_7_H06 MOHSA60005_D_6_H06 MOHSA60005_D_6_H03 MOHSA60005_D_7_H03 MOHSA60005_D_4_H05 MOHSAS60005_D_B03 MOHSAS60…	pL1L2_GT0_DelLacZ_bsd L1L2_gt0	3	51
MGI:1919110	Cfap52	11	-	41270	FALSE	Conditional Ready	Promotorless	KOMP-CSD	PCS00028_A_F11	PG00028_B_1_F11 PG00028_B_3_F11 PGS00028_A_F11 PG00028_B_4_F11	L1L2_gt2	1	4
MGI:2686209	Cfap57	4	-	478	FALSE	Conditional Ready	Promotorless	EUCOMM	PCS00007_A_F11 PCS00017_A_F11	PGS00007_A_F11 PG00017_B_2_F11 PGS00017_A_F11	L1L2_gt1	2	3
MGI:1926024	Cfap61	2	+	33734	FALSE	Conditional Ready	Promotorless	EUCOMM	PCS00040_A_C11	PG00040_A_2_C11 PG00040_A_3_C11 PG00040_A_4_C11 PGS00040_A_C11	L1L2_gt2	1	4
MGI:2443778	Cfap69	5	-	44774	FALSE	Conditional Ready	Promotorless	KOMP-CSD	PCS00052_A_H05	PG00052_A_1_H05 PGS00052_A_H05	L1L2_gt2	1	2
MGI:1336166	Cflar	1	+	40936	FALSE	Conditional Ready	Promotorless	EUCOMM	PCS00026_B_B12	PG00026_B_2_B12 PG00026_B_3_B12 PG00026_B_4_B12 PG00026_B_5_B12 PG00026_B_6_B12 PG00026_B_1_B12 PGS00026_B_B12	L1L2_st2	1	7
MGI:1261428	Chchd2	5	-	42525	FALSE	Conditional Ready	Promotorless	EUCOMM	PCS00038_A_B10	PG00038_A_2_B10 PG00038_A_3_B10 PG00038_A_4_B10 PGS00038_A_B10 PG00038_A_1_B10	L1L2_gt2	1	5
MGI:1913325	Chchd3	6	-	37337	FALSE	Conditional Ready	Promotorless	KOMP-CSD	PCS00023_E_H12	PGS00023_E_H12 PG00023_E_4_H12	L1L2_gt1	1	2
MGI:1344395	Chd3	11	-	318	FALSE	Conditional Ready	Promotorless	EUCOMM	PCS00005_A_G04 PCS00035_A_G04	PG00005_A_1_G04 PG00005_A_2_G04 PG00005_A_3_G04 PGS00005_A_G04 PG00035_A_2_G04 PG00035_A_3_G04 PG00035_A_4_G04 PGS00035_A_G04	L1L2_gt1	2	8
MGI:1344395	Chd3	11	-	39794	FALSE	Conditional Ready	Promotorless	EUCOMM	PCS00019_A_A02	PG00019_A_3_A02 PG00019_A_4_A02 PGS00019_A_A02	L1L2_gt0	1	3
MGI:3036258	Chd5	4	+	39221	FALSE	Conditional Ready	Promotorless	EUCOMM	PCS00011_A_F08 PCS00043_A_F08	PG00011_A_2_F08 PG00011_A_3_F08 PG00011_A_4_F08 PGS00011_A_F08 PG00043_A_2_F08 PG00043_A_4_F08 PGS00043_A_F08 PG00011_A_1_F08	L1L2_gt1	2	8
MGI:1918639	Chd6	2	-	35530	FALSE	Conditional Ready	Promotorless	KOMP-CSD	PCS00023_E_H01	PG00023_D_2_H01 PG00023_E_2_H01 PG00023_D_4_H01 PGS00023_A_H01 PG00023_D_3_H01 PG00023_D_1_H01 PGS00023_E_H01	L1L2_gt0	1	7
MGI:2444748	Chd7	4	+	35837	FALSE	Conditional Ready	Promotorless	EUCOMM	PCS00021_A_F02	PG00021_A_1_F01 PG00021_A_2_F02 PGS00021_A_F02 PGS00021_B_F02	L1L2_gt0 L1L2_st0	1	4
MGI:2444748	Chd7	4	+	40515	FALSE	Conditional Ready	Promotorless	EUCOMM	PCS00030_B_A01	PG00030_C_1_A01 PG00030_C_3_A01 PG00030_C_4_A01 PGS00030_C_A01 PG00030_C_2_A01	L1L2_gt0	1	5
MGI:1915288	Chid1	7	-	46967	FALSE	Conditional Ready	Promotorless	EUCOMM	PCS00064_A_A11	PG00064_A_4_A11 PGS00064_A_A11	L1L2_st1	1	2
MGI:1913621	Chmp4c	3	+	45866	FALSE	Conditional Ready	Promotorless	EUCOMM	PCS00062_A_C02	PG00062_A_2_C02 PGS00062_A_C02	L1L2_gt1	1	2
MGI:1933172	Chrdl1	X	-	41090	TRUE	Conditional Ready	Promotorless	KOMP-CSD	PCS00027_A_H03	PG00027_B_3_H03 PG00027_B_1_H03 PGS00027_A_H03 PG00027_B_4_H03	L1L2_st0	1	4
MGI:87885	Chrna1	2	-	27429	FALSE	Conditional Ready	Promotorless	EUCOMM	PCS00008_A_A06	PG00008_A_1_A06 PGS00008_A_A06 PG00008_A_2_A06	L1L2_gt0	1	3
MGI:87888	Chrna4	2	-	29686	FALSE	Conditional Ready	Promotorless	EUCOMM	PCS00008_A_A12	PG00008_A_1_A12 PG00008_A_4_A12 PGS00008_A_A12	L1L2_gt1	1	3
MGI:105313	Cit	5	+	37280	FALSE	Conditional Ready	Promotorless	KOMP-CSD	PCS00023_E_B05	GR00006_A01	L1L2_gt0	1	1
MGI:1276109	Cldn1	16	-	50419	FALSE	Conditional Ready	Promotorless	NorCOMM	M00022_I_MFG007_E9	M00022_T_MFG007_E9	L1L2_NTARU-2	1	1
MGI:106925	Cldn11	3	+	41511	FALSE	Conditional Ready	Promotorless	EUCOMM	PCS00030_B_H04	PG00030_B_4_H04 PGS00030_B_H04 PG00030_B_2_H04	L1L2_st1	1	3
MGI:3040968	Clec12a	6	+	45233	FALSE	Conditional Ready	Promotorless	KOMP-CSD	PCS00055_A_E08	PGS00055_A_E08 PGS00055_B_E08 PG00055_A_4_E08 PG00055_A_2_E08	L1L2_gt1	1	4
MGI:3036291	Clec4a1	6	+	45253	FALSE	Conditional Ready	Promotorless	KOMP-CSD	PCS00055_A_H07	PG00055_A_8_H07 PGS00055_B_H07 PG00055_A_4_H07 PG00055_A_6_H07 PGS00055_A_H07 PG00055_A_3_H07	L1L2_gt1	1	6
MGI:1345151	Clec5a	6	-	45167	FALSE	Conditional Ready	Promotorless	KOMP-CSD	PCS00055_A_E11	PG00055_A_4_E11 PGS00055_A_E11 PG00055_A_1_E11 PGS00055_B_E11 PG00055_A_7_E11 PG00055_A_2_E11 PG00055_A_8_E11	L1L2_st1	1	7
MGI:1920574	Clhc1	11	+	238	FALSE	Conditional Ready	Promotorless	EUCOMM	PCS00004_A_F08 PCS00034_A_F08	PG00004_A_1_F08 PG00034_A_1_C05 PG00034_A_3_C05 PG00034_A_4_C05 PG00034_A_6_C05 PG00034_A_8_C05 PGS00034_A_F08 PGS00004_A_F08	L1L2_gt0	2	8
MGI:107403	Clk1	1	-	42234	FALSE	Conditional Ready	Promotorless	EUCOMM	PCS00037_A_D10	PG00037_A_1_D10 PG00037_A_4_D10 PGS00037_A_D10	L1L2_gt2	1	3
MGI:2445153	Clspn	4	+	496	FALSE	Conditional Ready	Promotorless	EUCOMM	PCS00007_A_C07 PCS00017_A_C07	PG00007_B_4_B07 PG00007_B_4_C07 PGS00007_A_C07 PG00017_B_3_C07 PGS00017_A_C07	L1L2_gt0	2	5
MGI:1924029	Cluap1	16	+	42399	FALSE	Conditional Ready	Promotorless	KOMP-CSD	PCS00036_A_H09	PGS00036_A_H09 PG00036_A_2_H09 PG00036_A_1_H09	L1L2_gt2	1	3
MGI:103227	Cmah	13	+	34	FALSE	Conditional Ready	Promotorless	EUCOMM	PCS00006_A_A09 PCS00016_A_A09	PG00006_A_1_A09 PG00006_A_3_A09 PG00006_A_4_A09 PGS00006_A_A09 PG00016_B_1_A09 PGS00016_A_A09 PG00016_B_3_A08	L1L2_gt2	2	7
MGI:3650508	Cnbd1	4	-	33837	FALSE	Conditional Ready	Promotorless	EUCOMM	PCS00043_A_C11	PG00043_A_2_C11 PG00043_A_3_C11 PG00043_A_4_C11 PGS00043_A_C11	L1L2_gt1	1	4
MGI:88436	Cnga1	5	-	45071	TRUE	Conditional Ready	Promotorless	KOMP-CSD	PCS00055_A_G08	PG00055_A_1_G08 PG00055_A_2_G08 PG00055_A_3_G08 PG00055_A_6_G08 PG00055_A_7_G08 PG00055_A_8_G08 PGS00055_A_G08 PGS00055_B_G08 PG00055_A_4_C07	L1L2_gt2 L1L2_gt1	1	9
MGI:2670958	Cnksr1	4	-	44217	FALSE	Conditional Ready	Promotorless	KOMP-CSD	PCS00048_A_D04	PG00048_A_2_D04 PGS00048_A_D04	L1L2_gt1	1	2
MGI:2661175	Cnksr2	X	-	41070	TRUE	Conditional Ready	Promotorless	KOMP-CSD	PCS00027_A_G05	PGS00027_A_G05 PG00027_B_4_G05 PG00027_B_1_G05 PG00027_B_2_G05 PG00027_B_3_G05	L1L2_gt1	1	5
MGI:1919318	Cnot2	10	-	211861	FALSE	Conditional Ready	Promotorless	KOMP-CSD	PCS00148_A_G11	MOHFA50001_D_4_D03 PLNS50001_D_E05	L1L2_gt0	1	2
MGI:88437	Cnp	11	+	79	FALSE	Conditional Ready	Promotorless	EUCOMM	PCS00004_A_C05 PCS00034_A_C05	PG00004_A_1_C05 PG00004_A_3_C05 PG00004_A_4_C05 PGS00004_A_C05 PG00034_A_1_E08 PG00034_A_1_F08 PG00034_A_3_E08 PG00034_A_6_E08 PG00034_A_7_E08 PG00034_A_7_F08 PG00034_A_8_E08 PG00034_A_8_F08 PGS00034_A_C05 PG00004_A_2_C05 PG00034_A_5_E08	L1L2_gt0	2	15
MGI:1917505	Cnrip1	11	+	41844	FALSE	Conditional Ready	Promotorless	KOMP-CSD	PCS00031_A_D10	PGS00031_A_D10 PG00031_A_3_D10 PG00031_A_4_D10	L1L2_gt2	1	3
MGI:99605	Cntfr	4	-	376	FALSE	Conditional Ready	Promotorless	EUCOMM	PCS00007_A_A03 PCS00017_A_A03	PG00007_B_1_A04 PG00007_B_2_A03 PG00007_B_4_A03 PGS00007_A_A03 PG00017_B_1_A03 PG00017_B_3_A03 PGS00017_A_A03	L1L2_gt0 L1L2_st0	2	7
MGI:2443104	Cntln	4	+	36303	FALSE	Conditional Ready	Promotorless	KOMP-CSD	PCS00028_A_A07	PGS00028_A_A07 PG00028_B_1_A07 PG00028_B_3_A07	L1L2_gt0	1	3
MGI:1095737	Cntn4	6	+	42950	FALSE	Conditional Ready	Promotorless	KOMP-CSD	PCS00041_A_C11	PGS00041_A_C11 PG00041_A_1_C11 PG00041_A_4_C11 PG00041_A_3_C11	L1L2_st2	1	4
MGI:1858201	Cntnap1	11	+	98	FALSE	Conditional Ready	Promotorless	EUCOMM	PCS00004_A_C08 PCS00034_A_C08	PG00004_A_2_C08 PG00004_A_3_C08 PG00004_A_4_C08 PGS00004_A_C08 PG00034_A_4_F05 PG00034_A_6_F05 PG00034_A_7_F05 PGS00034_A_C08 PG00004_A_1_C08	L1L2_gt0 L1L2_st0	2	9
MGI:1914047	Cntnap2	6	+	43287	TRUE	Conditional Ready	Promotorless	EUCOMM	PCS00050_A_D12	PG00050_A_7_D12 PGS00050_A_D12 PG00050_A_8_D12	L1L2_st0	1	3
MGI:105056	Cobl	11	-	191774	FALSE	Conditional Ready	Promotorless	KOMP-CSD	PCS00134_A_H05	PLB60002_B_3_C05 PLBS60002_B_D09 PLB60002_B_2_C05	pL1L2_GT0_DelLacZ_bsd	1	3
MGI:1333873	Cog1	11	+	47402	FALSE	Conditional Ready	Promotorless	EUCOMM	PCS00063_A_G05	PG00063_B_2_G05 PG00063_B_3_G05 PGS00063_A_G05 PG00063_B_4_G05	L1L2_gt0	1	4
MGI:1923582	Cog2	8	+	42369	FALSE	Conditional Ready	Promotorless	KOMP-CSD	PCS00036_A_G03	PG00036_A_2_G03 PG00036_A_1_G03 PGS00036_A_G03 PG00036_A_3_G03	L1L2_gt0	1	4
MGI:88446	Col11a1	3	+	44767	FALSE	Conditional Ready	Promotorless	KOMP-CSD	PCS00052_A_B10	PG00052_A_6_B10 PG00052_A_8_B10 PGS00052_A_B10 PG00052_A_7_B10	L1L2_st1	1	4
MGI:1341272	Col14a1	15	+	44841	FALSE	Conditional Ready	Promotorless	KOMP-CSD	PCS00052_A_C12	PG00052_A_6_C12 PG00052_A_8_C12 PG00052_A_3_C12 PGS00052_A_C12 PG00052_A_5_C12	L1L2_st1	1	5
MGI:2653243	Col23a1	11	+	264	FALSE	Conditional Ready	Promotorless	EUCOMM	PCS00004_A_G06 PCS00034_A_G06	PG00004_A_1_F06 PG00004_A_1_G06 PG00004_A_2_F06 PG00004_A_2_G06 PG00004_A_3_F06 PG00004_A_4_F06 PG00004_A_4_G06 PGS00004_A_G06 PG00034_A_3_A07 PG00034_A_3_B07 PG00034_A_4_A07 PG00034_A_4_B07 PG00034_A_5_A07 PG00034_A_6_A07 PGS00034_A_G06 PG00004_A_3_G06 PG00034_A_8_A07	L1L2_gt0	2	17
MGI:1918605	Col24a1	3	+	41848	FALSE	Conditional Ready	Promotorless	EUCOMM	PCS00063_A_H12	PG00063_B_2_H12 PG00063_B_3_H12 PG00063_B_4_H12 PGS00063_A_H12	L1L2_gt2	1	4
MGI:2672118	Col27a1	4	+	36205	FALSE	Conditional Ready	Promotorless	KOMP-CSD	PCS00021_A_C10	PGS00021_A_C10	L1L2_gt1	1	1
MGI:88456	Col4a5	X	+	40775	FALSE	Conditional Ready	Promotorless	EUCOMM	PCS00033_A_E04	PG00033_A_2_E04 PG00033_A_3_E04 PG00033_A_4_E04 PGS00033_A_E04	L1L2_st1	1	4
MGI:88457	Col5a1	2	+	26464	FALSE	Conditional Ready	Promotorless	EUCOMM	PCS00008_A_A08	PG00008_A_1_A08 PG00008_A_2_A08 PG00008_A_4_A08 PGS00008_A_A08 PG00008_A_3_A08	L1L2_gt1	1	5
MGI:1858696	Copg1	6	+	43088	FALSE	Conditional Ready	Promotorless	EUCOMM	PCS00050_A_G01	PG00050_A_1_G01 PG00050_A_2_G01 PG00050_A_3_G01 PG00050_A_4_G01 PGS00050_A_G01	L1L2_gt0	1	5
MGI:1330276	Cops2	2	-	35087	FALSE	Conditional Ready	Promotorless	KOMP-CSD	PCS00023_E_F05	PGS00023_E_F05 PGS00023_A_F05 PG00023_D_2_F05 PG00023_E_4_F05 PG00023_C_3_F05 PG00023_D_3_F05 PG00023_D_4_F05 PG00023_C_1_F05 MOHFA50001_D_4_A11 MOHFA50001_D_5_A11 MOHFA50001_D_8_A11 MOHFA50001_D_7_A11 MOHFA50001_D_6_A11 PLNS50001_D_A04 MOHFA50001_D_1_A11	L1L2_gt0	1	15
MGI:1349414	Cops4	5	+	44610	TRUE	Conditional Ready	Promotorless	EUCOMM	PCS00054_B_H07	PG00054_A_4_H07 PGS00054_A_H07	L1L2_gt2	1	2
MGI:1917633	Cox10	11	-	308	FALSE	Conditional Ready	Promotorless	EUCOMM	PCS00005_A_G01 PCS00035_A_G01	PG00005_A_2_G01 PGS00005_A_G01 PG00035_A_1_G01 PGS00035_A_G01	L1L2_gt1	2	4
MGI:1920112	Cox15	19	-	44809	FALSE	Conditional Ready	Promotorless	KOMP-CSD	PCS00052_A_E07	PG00052_A_5_E07 PG00052_A_8_E07 PG00052_A_4_E07 PGS00052_A_E07 PG00052_A_6_E07 PG00052_A_2_E07 PG00052_A_7_E07	L1L2_gt0	1	7
MGI:2448532	Cox18	5	-	45902	TRUE	Conditional Ready	Promotorless	EUCOMM	PCS00060_A_D09	PG00060_A_1_D09 PG00060_A_2_D09 PG00060_A_3_D09 PG00060_A_4_D09 PGS00060_A_D09	L1L2_gt0	1	5
MGI:3617840	Cpa2	6	+	43294	FALSE	Conditional Ready	Promotorless	EUCOMM	PCS00054_B_E11	PG00054_A_1_E11 PG00054_A_2_E11 PG00054_A_3_E11 PG00054_A_4_E11 PGS00054_A_E11	L1L2_st2	1	5
MGI:1919041	Cpa4	6	+	41291	FALSE	Conditional Ready	Promotorless	KOMP-CSD	PCS00028_A_G03	PG00028_B_1_G03 PGS00028_A_G03 PG00028_B_4_G03 PG00028_B_2_G03	L1L2_st0	1	4
MGI:1921899	Cpa5	6	+	37303	FALSE	Conditional Ready	Promotorless	KOMP-CSD	PCS00027_A_E10	PG00027_B_2_E10 PGS00027_A_E10	L1L2_gt2	1	2
MGI:3045348	Cpa6	1	-	42703	FALSE	Conditional Ready	Promotorless	KOMP-CSD	PCS00041_A_B08	PG00041_A_2_B08 PG00041_A_4_B08 PGS00041_A_B08 PG00041_A_1_B08 PG00041_A_3_B08	L1L2_st0	1	5
MGI:1923953	Cpb1	3	-	42773	FALSE	Conditional Ready	Promotorless	KOMP-CSD	PCS00041_A_C08	PGS00041_A_C08 PG00041_A_2_C08 PG00041_A_1_C08	L1L2_st0	1	3
MGI:108442	Cpeb1	7	-	42943	FALSE	Conditional Ready	Promotorless	EUCOMM	PCS00051_A_B03	PG00051_A_2_B03 PGS00051_A_B03	L1L2_gt1	1	2
MGI:2442640	Cpeb2	5	+	42329	FALSE	Conditional Ready	Promotorless	KOMP-CSD	PCS00036_A_B04	PG00036_A_2_B04 PG00036_A_3_B05 PGS00036_A_B04 PG00036_A_1_B04	L1L2_gt0 L1L2_gt1	1	4
MGI:1914829	Cpeb4	11	+	241	FALSE	Conditional Ready	Promotorless	EUCOMM	PCS00004_A_F09 PCS00034_A_F09	PG00004_A_2_F09 PG00004_A_3_F09 PG00004_A_4_F09 PGS00004_A_F09 PG00034_A_4_C04 PG00034_A_6_C04 PG00034_A_7_C04 PGS00034_A_F09 PG00004_A_1_F09	L1L2_gt0	2	9
MGI:2444814	Cped1	6	+	41620	FALSE	Conditional Ready	Promotorless	EUCOMM	PCS00032_A_H06	PG00032_A_1_H06 PG00032_A_2_H06 PG00032_A_3_H06 PGS00032_A_H06 PG00032_A_4_H06	L1L2_gt1	1	5
MGI:2387578	Cpne2	8	+	42122	FALSE	Conditional Ready	Promotorless	KOMP-CSD	PCS00036_A_F03	PG00036_A_4_F03 PGS00036_A_F03 PG00036_A_3_F03 PG00036_A_1_F03	L1L2_gt0	1	4
MGI:1914121	Cpne8	15	-	43106	TRUE	Conditional Ready	Promotorless	KOMP-CSD	PCS00041_A_E03	PG00041_A_1_E03 PGS00041_A_E03 PG00041_A_2_E03 PG00041_A_4_E03 PG00041_A_3_E03	L1L2_gt1	1	5
MGI:109176	Cpt2	4	-	36516	FALSE	Conditional Ready	Promotorless	KOMP-CSD	PCS00027_A_F10	PG00027_B_3_F10 PGS00027_A_F10 PG00027_B_1_F10	L1L2_gt2	1	3
MGI:1926006	Cpxm2	7	-	43666	FALSE	Conditional Ready	Promotorless	KOMP-CSD	PCS00045_A_D09	PG00045_B_1_D09 PGS00045_D_D09 PGS00045_A_D09 PG00045_B_2_D09 PG00045_B_4_D09 PG00045_B_3_D09	L1L2_st0	1	6
MGI:88487	Cpz	5	-	42745	FALSE	Conditional Ready	Promotorless	KOMP-CSD	PCS00041_A_G09	PGS00041_A_G09 PG00041_A_1_G09	L1L2_st1	1	2
MGI:2685919	Cracr2a	6	+	41676	FALSE	Conditional Ready	Promotorless	KOMP-CSD	PCS00031_A_F02	PG00031_B_2_F02 PG00031_B_4_F02 PG00031_B_1_F02 PGS00031_A_F02	L1L2_gt0	1	4
MGI:1100818	Crcp	5	+	42163	FALSE	Conditional Ready	Promotorless	EUCOMM	PCS00037_A_E03	PG00037_A_1_E03 PG00037_A_2_E03 PG00037_A_4_E03 PGS00037_A_E03	L1L2_gt0	1	4
MGI:1347062	Creb3l1	2	-	27681	FALSE	Conditional Ready	Promotorless	EUCOMM	PCS00008_A_H05	PG00008_A_1_H05 PGS00008_A_H05 MPGS8001_A_G04	L1L2_gt0	1	3
MGI:2442695	Creb3l2	6	-	41898	FALSE	Conditional Ready	Promotorless	KOMP-CSD	PCS00031_A_C03	PG00031_A_3_C03 PGS00031_A_C03 PG00031_B_4_D04 PG00031_A_2_C03 PG00031_A_13_C04 PG00031_B_4_C03 PG00031_B_1_C03 PG00031_B_2_C03 PG00031_A_4_C03	L1L2_gt0	1	9
MGI:1098280	Crebbp	16	-	180486	FALSE	Conditional Ready	Promotorless	KOMP-CSD	PCS00139_B_F03	MOHFA50001_D_7_F09 MOHFA50001_D_3_F09 MOHFA50001_D_4_F09 MOHFA50001_D_1_F09 PLNS50001_D_D12	L1L2_gt1	1	5
MGI:88498	Crhr1	11	+	123	FALSE	Conditional Ready	Promotorless	EUCOMM	PCS00004_A_D03 PCS00034_A_D03	PG00004_A_1_D03 PG00004_A_3_D03 PG00004_A_4_D03 PGS00004_A_D03 PG00034_A_1_E10 PG00034_A_3_E10 PG00034_A_4_E10 PG00034_A_5_E10 PG00034_A_6_E10 PGS00034_A_D03 PG00004_A_2_D03	L1L2_gt0 L1L2_st0	2	11
MGI:1925331	Crisp4	1	-	41546	FALSE	Conditional Ready	Promotorless	KOMP-CSD	PCS00028_A_A10	PGS00028_A_A10 PG00028_B_2_A10 PG00028_B_4_A10	L1L2_st1	1	3
MGI:1926142	Crispld2	8	+	43718	FALSE	Conditional Ready	Promotorless	KOMP-CSD	PCS00045_A_G09	PG00045_A_8_G09 PG00045_A_5_G09 PG00045_A_6_G09 PG00045_D_2_G09 PGS00045_D_G09 PG00045_D_1_G09 PG00045_D_4_G09	L1L2_st0	1	7
MGI:104686	Crkl	16	+	44027	FALSE	Conditional Ready	Promotorless	EUCOMM	PCS00054_B_H06	PG00054_A_1_H06 PG00054_A_4_H06 PGS00054_A_H06	L1L2_gt2	1	3
MGI:1860086	Crlf3	11	-	38187	FALSE	Conditional Ready	Promotorless	KOMP-CSD	PCS00023_E_B01	PG00023_E_2_B01 PGS00023_E_B01 PGS00023_A_B01 PG00023_D_4_B01	L1L2_gt0	1	4
MGI:88518	Cryba1	11	-	455	FALSE	Conditional Ready	Promotorless	EUCOMM	PCS00016_A_G01	PG00016_B_1_G01 PG00016_B_3_G01 PG00016_B_4_G01 PGS00016_A_G01	L1L2_st2	1	4
MGI:102716	Cryba4	5	-	42643	FALSE	Conditional Ready	Promotorless	EUCOMM	PCS00037_A_E10	PG00037_A_1_E10 PGS00037_A_E10	L1L2_gt2	1	2
MGI:104992	Crybb1	5	+	43126	FALSE	Conditional Ready	Promotorless	EUCOMM	PCS00050_A_F06	PGS00050_A_F06 PG00050_A_4_F06	L1L2_gt0	1	2
MGI:88519	Crybb2	5	-	40003	FALSE	Conditional Ready	Promotorless	EUCOMM	PCS00030_B_G10	PG00030_C_1_G10 PG00030_C_4_G10 PGS00030_C_G10 PG00030_C_3_G10	L1L2_gt2	1	4
MGI:102717	Crybb3	5	-	45123	FALSE	Conditional Ready	Promotorless	KOMP-CSD	PCS00055_A_C06	PGS00055_A_C06 PGS00055_B_C06 PG00055_A_3_C06	L1L2_gt2	1	3
MGI:2449167	Crygn	5	-	40811	FALSE	Conditional Ready	Promotorless	EUCOMM	PCS00029_A_G07	PG00029_A_3_G07 PGS00029_A_G07 PG00029_A_2_G07	L1L2_gt0	1	3
MGI:88527	Cryz	3	+	41692	FALSE	Conditional Ready	Promotorless	KOMP-CSD	PCS00031_A_B03	PG00031_B_2_B03 PGS00031_A_B03 PG00031_A_4_B03	L1L2_gt0	1	3
MGI:1339951	Cse1l	2	+	35618	FALSE	Conditional Ready	Promotorless	KOMP-CSD	PCS00023_E_B10	PG00023_E_4_B10 PG00023_E_1_B10 PG00023_E_2_B10 PGS00023_E_B10 PG00023_E_3_B10	L1L2_gt1	1	5
MGI:1339753	Csf1	3	-	44954	FALSE	Conditional Ready	Promotorless	KOMP-CSD	PCS00052_A_E12	PGS00052_A_E12 PG00052_A_3_E12	L1L2_st1	1	2
MGI:1926002	Csgalnact2	6	-	41645	TRUE	Conditional Ready	Promotorless	KOMP-CSD	PCS00031_A_B11	PG00031_A_13_B11 PG00031_A_15_B11 PGS00031_A_B11	L1L2_st0	1	3
MGI:2386401	Csmd2	4	+	506	FALSE	Conditional Ready	Promotorless	EUCOMM	PCS00016_A_G10 PCS00006_A_G10	PG00016_B_3_G10 PGS00016_A_G10 PG00006_A_1_G10 PG00006_A_4_G10 PGS00006_A_G10 PG00006_A_2_G10 PG00006_A_3_G10	L1L2_gt2	2	7
MGI:1925021	Csrnp3	2	+	39330	FALSE	Conditional Ready	Promotorless	EUCOMM	PCS00044_A_A09	PG00044_A_5_A09 PG00044_A_6_A09 PGS00044_A_A09	L1L2_gt1	1	3
MGI:1917264	Csrp2bp	2	+	35277	FALSE	Conditional Ready	Promotorless	KOMP-CSD	PCS00023_E_D10	PG00023_E_2_D10 PG00023_D_2_D10 PG00023_D_4_D10 PGS00023_A_D10 PG00023_C_1_D10 PGS00023_E_D10	L1L2_gt1	1	6
MGI:1298217	Cst7	2	+	35292	FALSE	Conditional Ready	Promotorless	KOMP-CSD	PCS00020_A_D11	PGS00020_A_D11 PG00020_A_4_D11	L1L2_st1	1	2
MGI:1343054	Cstf2	X	+	40620	FALSE	Conditional Ready	Promotorless	EUCOMM	PCS00030_B_C01	PG00030_B_3_C01 PG00030_B_4_C01 PG00030_C_1_C01 PG00030_C_2_C01 PG00030_C_3_C01 PG00030_C_4_C01 PGS00030_B_C01 PGS00030_C_C01 PG00030_A_1_F12	L1L2_gt0 L1L2_gt2	1	9
MGI:1921495	Ctbs	3	+	41348	FALSE	Conditional Ready	Promotorless	EUCOMM	PCS00032_A_E09	PG00032_A_2_E09 PG00032_A_4_E09 PGS00032_A_E09 PG00032_A_3_E09	L1L2_st0	1	4
MGI:109447	Ctcf	8	+	39798	FALSE	Conditional Ready	Promotorless	EUCOMM	PCS00019_A_G07	PG00019_A_1_G07 PG00019_A_2_G07 PG00019_A_4_G07 PGS00019_A_G07	L1L2_gt1	1	4
MGI:109447	Ctcf	8	+	40789	FALSE	Conditional Ready	Promotorless	EUCOMM	PCS00029_A_C04	PG00029_A_1_C04 PG00029_A_2_C04 PG00029_A_3_C04 PG00029_A_4_C04 PG00029_A_4_C05 PGS00029_A_C04 PG00029_A_1_C03	L1L2_gt0	1	7
MGI:1196405	Ctdspl2	2	+	35033	FALSE	Conditional Ready	Promotorless	KOMP-CSD	PCS00023_E_H05	PG00023_E_4_H05 PG00023_E_2_H05 PG00023_E_3_H05 PG00023_E_1_H05 PGS00023_E_H05	L1L2_gt0	1	5
MGI:1859649	Ctnnal1	4	-	36202	FALSE	Conditional Ready	Promotorless	EUCOMM	PCS00021_A_C04	PG00021_A_2_C04 PGS00021_A_C04 PGS00021_B_C04 PG00021_B_1_C04	L1L2_gt0 L1L2_st0	1	4
MGI:88276	Ctnnb1	9	+	39547	FALSE	Conditional Ready	Promotorless	EUCOMM	PCS00043_A_D05	PLBS60002_B_B06 PLB60002_B_2_B06 PLB60002_B_3_B06 GR00064_H06	pL1L2_GT0_DelLacZ_bsd L1L2_gt0	1	4
MGI:1915756	Ctnnbip1	4	+	577	FALSE	Conditional Ready	Promotorless	EUCOMM	PCS00007_A_C09 PCS00017_A_C09	PG00007_B_1_C09 PG00007_B_2_C09 PG00007_B_4_B09 PG00007_B_4_C09 PGS00007_A_C09 PG00017_B_2_C09 PGS00017_A_C09 PG00017_B_3_C09 PG00007_B_3_C09	L1L2_gt0	2	9
MGI:1913892	Ctnnbl1	2	+	29253	FALSE	Conditional Ready	Promotorless	EUCOMM	PCS00008_A_E07	PG00008_A_1_E07 PGS00008_A_E07	L1L2_gt0	1	2
MGI:1932872	Ctns	11	-	333	FALSE	Conditional Ready	Promotorless	EUCOMM	PCS00005_A_G06 PCS00035_A_G06	PG00005_A_1_G06 PG00005_A_2_G06 PG00005_A_3_G06 PG00005_A_4_G06 PGS00005_A_G06 PG00035_A_1_G06 PG00035_A_2_G06 PGS00035_A_G06 PG00035_A_3_G06	L1L2_gt1 L1L2_st1	2	9
MGI:109345	Ctr9	7	+	42435	FALSE	Conditional Ready	Promotorless	EUCOMM	PCS00086_A_C01	PLBS60002_B_C01	pL1L2_GT0_DelLacZ_bsd	1	1
MGI:97748	Ctsa	2	+	29429	FALSE	Conditional Ready	Promotorless	EUCOMM	PCS00008_A_F04	PG00008_A_1_F04 PG00008_A_2_F04 PG00008_A_3_F04 PG00008_A_4_F04 PGS00008_A_F04	L1L2_gt0	1	5
MGI:88562	Ctsd	7	-	41779	FALSE	Conditional Ready	Promotorless	EUCOMM	PCS00063_A_D12	PG00063_B_4_D12 PGS00063_A_D12 PG00063_B_2_D12	L1L2_st1	1	3
MGI:107285	Ctsh	9	+	42823	FALSE	Conditional Ready	Promotorless	KOMP-CSD	PCS00041_A_D08	PG00041_A_2_D08 PGS00041_A_D08 PG00041_A_3_D08 PG00041_A_1_D08	L1L2_st0	1	4
MGI:1913765	Cul7	17	+	42720	FALSE	Conditional Ready	Promotorless	EUCOMM	PCS00046_A_A05	PG00046_A_1_A05 PG00046_A_2_A05 PGS00046_A_A05	L1L2_gt1	1	3
MGI:1925246	Cutal	2	+	33642	FALSE	Conditional Ready	Promotorless	EUCOMM	PCS00042_A_F03	PG00042_A_1_F03 PGS00042_A_F03	L1L2_gt0	1	2
MGI:1914730	Cwc25	11	-	101	FALSE	Conditional Ready	Promotorless	EUCOMM	PCS00034_A_C10	PGS00034_A_C10 PG00034_A_8_F03 PG00034_A_3_F03 PG00034_A_5_F03 PG00034_A_7_F03	L1L2_gt0	1	5
MGI:2444131	Cwh43	5	+	43241	FALSE	Conditional Ready	Promotorless	EUCOMM	PCS00051_A_D12	PGS00051_A_D12 PG00051_A_2_D12	L1L2_st1	1	2
MGI:103556	Cxcl12	6	+	42159	FALSE	Conditional Ready	Promotorless	EUCOMM	PCS00037_A_E12	PG00037_A_1_E12 PG00037_A_2_E12 PG00037_A_4_E12 PGS00037_A_E12	L1L2_st1	1	4
MGI:103253	Cyb561	11	-	120	FALSE	Conditional Ready	Promotorless	EUCOMM	PCS00016_A_C02	PG00016_B_1_C02 PG00016_B_2_C02 PG00016_B_3_C02 PG00016_B_4_C02 PGS00016_A_C02	L1L2_st2	1	5
MGI:1919657	Cyb5rl	4	+	44665	FALSE	Conditional Ready	Promotorless	KOMP-CSD	PCS00049_A_G07	PGS00049_A_G07 PGS00049_B_G07 PG00049_A_3_G07 PG00049_A_2_G07	L1L2_gt2	1	4
MGI:2149481	Cygb	11	-	40214	FALSE	Conditional Ready	Promotorless	EUCOMM	PCS00026_B_B01	PGS00026_B_B01 PG00026_B_5_A01	L1L2_gt2 L1L2_st0	1	2
MGI:88586	Cyp17a1	19	-	42149	FALSE	Conditional Ready	Promotorless	EUCOMM	PCS00037_A_B12	PG00037_A_4_B12 PGS00037_A_B12	L1L2_st0	1	2
MGI:1919332	Cyp2c55	19	+	42141	FALSE	Conditional Ready	Promotorless	KOMP-CSD	PCS00037_A_C12	PGS00037_A_C12 PG00037_A_1_C12 PG00037_A_2_C12 PG00037_A_3_C12	L1L2_st1	1	4
MGI:2385197	Cyp2j13	4	-	436	FALSE	Conditional Ready	Promotorless	EUCOMM	PCS00007_A_E05 PCS00017_A_E05	PG00007_B_4_E05 PGS00007_A_E05 PG00017_B_3_E05 PGS00017_A_E05	L1L2_gt0 L1L2_st0	2	4
MGI:1921769	Cyp2j9	4	-	36383	FALSE	Conditional Ready	Promotorless	KOMP-CSD	PCS00021_A_A05	PG00021_B_1_A05 PG00021_B_3_A05 PG00021_C_1_A05 PG00021_C_3_A05 PGS00021_B_A05 PGS00021_A_A05 PG00021_B_4_A05	L1L2_st0 L1L2_gt0	1	7
MGI:88610	Cyp3a13	5	-	47315	FALSE	Conditional Ready	Promotorless	EUCOMM	PCS00063_A_D11	PG00063_B_2_D11 PG00063_B_4_D11 PGS00063_A_D11	L1L2_st2	1	3
MGI:106099	Cyp3a16	5	-	43594	FALSE	Conditional Ready	Promotorless	KOMP-CSD	PCS00045_A_B09	PG00045_B_1_B09 PGS00045_D_B09 PG00045_B_4_B09 PG00045_B_2_B09 PG00045_B_3_B09 PGS00045_A_B09	L1L2_st0	1	6
MGI:1096550	Cyp4a14	4	-	41474	FALSE	Conditional Ready	Promotorless	EUCOMM	PCS00029_A_B01	PG00029_A_1_B01 PG00029_A_2_B01 PG00029_A_3_B01 PG00029_A_4_B01 PGS00029_A_B01	L1L2_st0	1	5
MGI:2142763	Cyp4v3	8	-	44867	FALSE	Conditional Ready	Promotorless	KOMP-CSD	PCS00052_A_G11	PG00052_A_7_G11 PGS00052_A_G11 PG00052_A_6_G11 PG00052_A_8_G11 PG00052_A_5_G11	L1L2_st0	1	5
MGI:1932403	Cyp4x1	4	-	467	FALSE	Conditional Ready	Promotorless	EUCOMM	PCS00017_A_H06	PG00017_B_2_H06 PGS00017_A_H06 PG00017_B_3_H06	L1L2_st0	1	3
MGI:1334257	Cyth1	11	-	33724	FALSE	Conditional Ready	Promotorless	EUCOMM	PCS00040_A_A08	PG00040_A_2_A08 PG00040_A_3_A08 PGS00040_A_A08	L1L2_gt1	1	3
MGI:1335107	Cyth3	5	+	42324	FALSE	Conditional Ready	Promotorless	KOMP-CSD	PCS00036_A_G01	PGS00036_A_G01 PG00036_A_3_G01	L1L2_gt0	1	2
MGI:2183535	Cytip	2	-	41376	FALSE	Conditional Ready	Promotorless	KOMP-CSD	PCS00028_A_F09	PG00028_B_4_F09 PGS00028_A_F09	L1L2_gt1	1	2
MGI:3036268	D130043K22Rik	13	+	43883	TRUE	Conditional Ready	Promotorless	KOMP-CSD	PCS00045_A_C12	PG00045_D_3_C12 PG00045_A_7_C12 PG00045_D_4_C12 PGS00045_D_C12 PG00045_A_8_C12 PG00045_D_1_C12	L1L2_st1	1	6
MGI:1196400	D16Ertd472e	16	-	40974	TRUE	Conditional Ready	Promotorless	EUCOMM	PCS00026_B_D06	PG00026_A_2_D06 PG00026_A_4_D06 PG00026_B_1_D06 PG00026_B_3_D06 PG00026_B_4_D06 PG00026_B_6_D06 PG00026_B_7_D06 PGS00026_A_D06 PGS00026_B_D06 PG00026_B_8_D06	L1L2_gt1	1	10
MGI:2147848	D330045A20Rik	X	+	41153	FALSE	Conditional Ready	Promotorless	KOMP-CSD	PCS00027_A_B01	PGS00027_A_B01 PG00027_B_2_A01 PG00027_B_2_B01 PG00027_B_4_A01 PG00027_B_1_A01 PG00027_B_1_B01 PG00027_B_3_B01 PG00027_B_3_A01 PG00027_B_4_B01	L1L2_gt0	1	9
MGI:1289213	D3Ertd751e	3	+	44945	FALSE	Conditional Ready	Promotorless	KOMP-CSD	PCS00052_A_G04	PG00052_A_7_G04 PGS00052_A_G04 PG00052_A_8_G04	L1L2_gt1	1	3
MGI:2138198	D630023F18Rik	1	-	45017	FALSE	Conditional Ready	Promotorless	KOMP-CSD	PCS00052_A_D03	PG00052_A_1_D03 PGS00052_A_D03 PG00052_A_6_D03 PG00052_A_5_D03	L1L2_gt0	1	4
MGI:2677061	Dagla	19	-	40176	TRUE	Conditional Ready	Promotorless	EUCOMM	PCS00029_A_F02	PG00029_A_3_F02 PG00029_A_4_F02 PGS00029_A_F02	L1L2_gt0	1	3
MGI:1923089	Daw1	1	+	44713	FALSE	Conditional Ready	Promotorless	KOMP-CSD	PCS00049_A_A08	PG00049_A_1_A08 PGS00049_B_A08	L1L2_gt2	1	2
MGI:2652818	Dcdc2a	13	+	30	TRUE	Conditional Ready	Promotorless	EUCOMM	PCS00006_A_A07 PCS00016_A_A07	PG00006_A_1_A07 PG00006_A_4_A07 PGS00006_A_A07 PG00016_B_3_A07 PGS00016_A_A07 PG00006_A_3_A07	L1L2_gt2	2	6
MGI:102726	Dck	5	+	43679	FALSE	Conditional Ready	Promotorless	EUCOMM	PCS00047_A_G06	PG00047_A_1_G06 PG00047_A_2_G06 PG00047_A_3_G06 PGS00047_A_G06	L1L2_gt0	1	4
MGI:1891689	Dctn5	7	+	41679	FALSE	Conditional Ready	Promotorless	KOMP-CSD	PCS00036_A_H07	PGS00036_A_H07 PG00036_A_1_H07	L1L2_gt2	1	2
MGI:1277171	Dcx	X	-	40237	FALSE	Conditional Ready	Promotorless	EUCOMM	PCS00050_A_B01	PG00050_A_1_B01 PG00050_A_2_B01 PG00050_A_3_B01 PG00050_A_4_B01 PG00050_A_5_B01 PG00050_A_6_B01 PG00050_A_7_B01 PG00050_A_8_B01 PGS00050_A_B01	L1L2_gt0	1	9
MGI:2150302	Ddhd1	14	-	42706	TRUE	Conditional Ready	Promotorless	KOMP-CSD	PCS00049_A_D06	PGS00049_A_D06 PG00049_A_6_D06 PG00049_A_4_D06 PG00049_A_8_D06 PGS00049_B_D06 PG00049_A_3_D06	L1L2_gt2	1	6
MGI:1914192	Ddx18	1	-	47777	FALSE	Conditional Ready	Promotorless	EUCOMM	PCS03011_B_D03	PLBS60002_B_C08 PLB60002_B_3_F09 PLB60002_B_2_F09	pL1L2_GT1_DelLacZ_bsd	1	3
MGI:1858415	Ddx20	3	-	47586	FALSE	Conditional Ready	Promotorless	EUCOMM	PCS00071_A_F01	MOHFA50001_D_5_B11 PLNS50001_D_C05	L1L2_gt0	1	2
MGI:2385884	Ddx27	2	+	35616	FALSE	Conditional Ready	Promotorless	KOMP-CSD	PCS00023_E_A02	PG00023_E_3_A02 PG00023_E_1_A02 PG00023_E_4_A02 PGS00023_E_A02	L1L2_gt0	1	4
MGI:1925644	Ddx52	11	+	33659	FALSE	Conditional Ready	Promotorless	EUCOMM	PCS00040_A_E01	PG00040_A_2_E01 PG00040_A_3_E01 PG00040_A_4_E01 PGS00040_A_E01	L1L2_gt0	1	4
MGI:1915098	Ddx55	5	+	42804	FALSE	Conditional Ready	Promotorless	EUCOMM	PCS00054_B_D01	PG00054_A_1_D01 PG00054_A_2_D01 PG00054_A_3_D01 PG00054_A_4_D01 PGS00054_A_D01	L1L2_gt2	1	5
MGI:2442858	Ddx58	4	-	366	TRUE	Conditional Ready	Promotorless	EUCOMM	PCS00005_A_G11 PCS00035_A_G11	PG00005_A_1_G11 PG00005_A_3_G11 PG00005_A_4_G11 PGS00005_A_G11 PG00035_A_3_G11 PGS00035_A_G11 PG00005_A_2_G11	L1L2_gt1	2	7
MGI:1914710	Decr1	4	-	33744	FALSE	Conditional Ready	Promotorless	EUCOMM	PCS00040_A_B04	PG00040_A_3_B04 PG00040_A_4_B04 PGS00040_A_B04	L1L2_gt0	1	3
MGI:2684967	Defb21	2	+	41303	FALSE	Conditional Ready	Promotorless	KOMP-CSD	PCS00028_A_C07	PG00028_B_1_C07 PGS00028_A_C07 PG00028_B_3_C07 PG00028_B_4_C07 PG00028_B_2_C07	L1L2_st0	1	5
MGI:3650541	Defb45	2	-	43113	FALSE	Conditional Ready	Promotorless	KOMP-CSD	PCS00041_A_D10	PGS00041_A_D10 PG00041_A_4_D10 PG00041_A_2_D10	L1L2_st1	1	3
MGI:2181193	Dennd2d	3	+	41823	FALSE	Conditional Ready	Promotorless	KOMP-CSD	PCS00031_A_C09	PGS00031_A_C09 PG00031_A_15_C09 PG00031_A_1_C09 PG00031_A_3_C09 PG00031_A_2_C09	L1L2_gt0	1	5
MGI:1923381	Depdc1a	3	+	44880	TRUE	Conditional Ready	Promotorless	KOMP-CSD	PCS00052_A_A02	PG00052_A_7_A02 PG00052_A_4_A02 PG00052_A_5_A02 PG00052_A_8_A02 PG00052_A_6_A02 PGS00052_A_A02 PG00052_A_3_A02	L1L2_gt0	1	7
MGI:2146322	Deptor	15	+	42843	FALSE	Conditional Ready	Promotorless	EUCOMM	PCS00046_A_H07	PGS00046_A_H07 PG00046_A_2_H07	L1L2_gt2	1	2
MGI:2151483	Derl2	11	-	325	FALSE	Conditional Ready	Promotorless	EUCOMM	PCS00007_A_D01	PG00007_B_2_D01 PG00007_B_3_D01 PG00007_B_4_D01 PGS00007_A_D01	L1L2_gt0	1	4
MGI:1196227	Dffa	4	+	46331	FALSE	Conditional Ready	Promotorless	EUCOMM	PCS00060_A_C07	PG00060_A_1_C07 PG00060_A_3_C07 PGS00060_A_C07 PG00060_A_2_C07	L1L2_gt1	1	4
MGI:1196287	Dffb	4	-	46965	FALSE	Conditional Ready	Promotorless	EUCOMM	PCS00064_A_B08	PG00064_A_1_B08 PG00064_A_3_B08 PGS00064_A_B08	L1L2_gt1	1	3
MGI:892866	Dgcr2	16	-	46920	FALSE	Conditional Ready	Promotorless	EUCOMM	PCS00064_A_A12	PGS00064_A_A12 PG00064_A_3_A12	L1L2_st1	1	2
MGI:105060	Dgkg	16	-	43334	TRUE	Conditional Ready	Promotorless	KOMP-CSD	PCS00045_A_B02	PGS00045_D_B02 PG00045_D_1_B02 PG00045_D_4_B02 PG00045_A_6_B02 PG00045_A_7_B02 PG00045_B_4_B02 PG00045_A_5_B02 PG00045_D_3_B02 PG00045_D_2_B02 PG00045_B_3_B02 PG00045_A_8_B02 PGS00045_A_B02 PG00045_B_1_B02	L1L2_gt0	1	13
MGI:2443430	Dgki	6	-	43641	FALSE	Conditional Ready	Promotorless	EUCOMM	PCS00047_A_E06	PG00047_A_1_E06 PGS00047_A_E06	L1L2_gt0	1	2
MGI:102918	Dgkq	5	-	45117	FALSE	Conditional Ready	Promotorless	KOMP-CSD	PCS00055_A_C04	PG00055_A_2_C04 PG00055_A_3_C04 PG00055_A_4_C04 PG00055_A_5_C04 PG00055_A_7_C04 PGS00055_A_C04 PGS00055_B_C04 PG00055_A_1_C04	L1L2_gt1	1	8
MGI:1351602	Dguok	6	-	43098	TRUE	Conditional Ready	Promotorless	EUCOMM	PCS00047_A_E02	PG00047_A_2_E02 PG00047_A_4_E02 PGS00047_A_E02	L1L2_gt0	1	3
MGI:1922004	Dhcr24	4	+	456	FALSE	Conditional Ready	Promotorless	EUCOMM	PCS00017_A_D06	PG00017_B_2_D06 PGS00017_A_D06 PG00017_B_4_D06	L1L2_st0	1	3
MGI:1298378	Dhcr7	7	+	44428	TRUE	Conditional Ready	Promotorless	EUCOMM	PCS00054_B_G10	PG00054_A_2_G10 PG00054_A_4_G10 PGS00054_A_G10	L1L2_gt2	1	3
MGI:2384931	Dhrs7b	11	+	39122	FALSE	Conditional Ready	Promotorless	EUCOMM	PCS00043_A_A11	PG00043_A_2_A11 PG00043_A_3_A11 PGS00043_A_A11	L1L2_gt1	1	3
MGI:1919412	Dhx36	3	-	44459	TRUE	Conditional Ready	Promotorless	KOMP-CSD	PCS00049_A_D07	PGS00049_A_D07 PGS00049_B_D07 PG00049_A_5_D07	L1L2_gt2	1	3
MGI:1931560	Dhx58	11	-	82	TRUE	Conditional Ready	Promotorless	EUCOMM	PCS00005_A_B07	PG00005_A_2_B07 PG00005_A_3_B07 PGS00005_A_B07	L1L2_gt1	1	3
MGI:1306823	Dhx8	11	+	47341	FALSE	Conditional Ready	Promotorless	EUCOMM	PCS00064_A_E03	PG00064_A_1_E03 PG00064_A_2_E03 PG00064_A_3_E03 PG00064_A_4_E03 PGS00064_A_E03	L1L2_gt0	1	5
MGI:1194490	Diaph1	18	-	40158	FALSE	Conditional Ready	Promotorless	EUCOMM	PCS00030_B_H07	PG00030_C_1_H07 PG00030_C_3_H07 PG00030_C_4_H07 PGS00030_C_H07 PG00030_C_2_H07	L1L2_st2	1	5
MGI:2145977	Dip2b	15	+	47397	FALSE	Conditional Ready	Promotorless	EUCOMM	PCS00063_A_A08	PG00063_B_1_A08 PGS00063_A_A08	L1L2_gt1	1	2
MGI:1861727	Dkc1	X	+	44123	FALSE	Conditional Ready	Promotorless	EUCOMM	PCS00046_A_D04	PG00046_A_2_D04 PGS00046_A_D04	L1L2_gt0	1	2
MGI:107231	Dlg1	16	+	39007	TRUE	Conditional Ready	Promotorless	KOMP-CSD	PCS00023_E_B08	PGS00023_A_B08 PG00023_C_2_B09 PG00023_C_4_B08 PG00023_C_1_B08 PG00023_C_3_B09 PG00023_E_3_B08 PG00023_E_4_B08 PG00023_D_1_B08 PGS00023_E_B08 PG00023_C_1_B09 PG00023_C_2_B08 PG00023_C_4_B09 PG00023_C_3_B08	L1L2_gt0	1	13
MGI:1344351	Dlg2	7	+	42053	FALSE	Conditional Ready	Promotorless	EUCOMM	PCP10002_A_B04 PCP10002_A_B05	PFA0002_A_8_B04 PFA0002_A_1_B05 PFA0002_A_5_B04 PFA0002_A_6_B04	L1L2_gt1	2	4
MGI:1888986	Dlg3	X	+	40531	FALSE	Conditional Ready	Promotorless	EUCOMM	PCS00033_A_A12	PG00033_A_1_A12 PG00033_A_2_A12 PG00033_A_4_A12 PGS00033_A_A12	L1L2_gt1	1	4
MGI:104659	Dll1	17	-	40146	FALSE	Conditional Ready	Promotorless	EUCOMM	PCS00030_B_C06	PG00030_B_3_C06 PG00030_B_4_C06 PG00030_C_1_C04 PG00030_C_1_C06 PG00030_C_2_C06 PGS00030_B_C06 PGS00030_C_C06 PG00030_C_4_C06	L1L2_st1	1	8
MGI:1096877	Dll3	7	-	46419	FALSE	Conditional Ready	Promotorless	EUCOMM	PCS00060_A_A12	PG00060_A_1_A12 PG00060_A_2_A11 PG00060_A_3_A12 PG00060_A_4_A11 PGS00060_A_A12 PG00060_A_4_A12	L1L2_st0	1	6
MGI:94903	Dlx3	11	+	69	FALSE	Conditional Ready	Promotorless	EUCOMM	PCS00005_A_B05	PG00005_A_1_B05 PG00005_A_2_B05 PG00005_A_4_B06 PGS00005_A_B05 PG00005_A_3_B05	L1L2_gt1	1	5
MGI:2653629	Dmrta2	4	+	36597	FALSE	Conditional Ready	Promotorless	KOMP-CSD	PCS00028_A_E03	PG00028_B_1_E03 PGS00028_A_E03 PG00028_B_2_E03 PG00028_B_4_E03 PG00028_B_3_E03	L1L2_gt0	1	5
MGI:1927125	Dmrtb1	4	-	483	FALSE	Conditional Ready	Promotorless	EUCOMM	PCS00007_A_B12	PGS00007_A_B12	L1L2_gt1	1	1
MGI:107731	Dnah2	11	-	319	FALSE	Conditional Ready	Promotorless	EUCOMM	PCS00005_A_G05	PG00005_A_1_G05 PGS00005_A_G05	L1L2_gt1	1	2
MGI:107744	Dnah6	6	-	43553	FALSE	Conditional Ready	Promotorless	EUCOMM	PCS00047_A_B06	PG00047_A_3_B06 PGS00047_A_B06	L1L2_gt0	1	2
MGI:1289279	Dnah9	11	-	44288	FALSE	Conditional Ready	Promotorless	KOMP-CSD	PCS00048_A_A05	PGS00048_A_A05 PG00048_A_2_A05 PG00048_A_1_A05 PG00048_A_3_A05 PG00048_A_4_A06 PG00048_A_4_A05	L1L2_gt1 L1L2_gt2	1	6
MGI:2685574	Dnaic2	11	+	134	TRUE	Conditional Ready	Promotorless	EUCOMM	PCS00004_A_D07	PG00004_A_1_D07 PG00004_A_3_D07 PG00004_A_4_D07 PGS00004_A_D07 PG00004_A_2_D07	L1L2_gt0	1	5
MGI:1930018	Dnajb5	4	+	373	FALSE	Conditional Ready	Promotorless	EUCOMM	PCS00016_A_F08	PGS00016_A_F08	L1L2_gt2	1	1
MGI:1913576	Dnajc5b	3	+	45875	TRUE	Conditional Ready	Promotorless	EUCOMM	PCS00062_A_D02	PG00062_A_1_D02 PG00062_A_2_D02 PG00062_A_4_D02 PGS00062_A_D02 PG00062_A_3_D02	L1L2_gt2	1	5
MGI:1919935	Dnajc6	4	+	465	FALSE	Conditional Ready	Promotorless	EUCOMM	PCS00017_A_A11	PGS00017_A_A11 PG00017_B_2_A11 PG00017_B_3_A11 PG00017_B_1_A11	L1L2_gt1	1	4
MGI:1922813	Dnali1	4	-	39154	FALSE	Conditional Ready	Promotorless	EUCOMM	PCS00044_A_H12	PG00044_A_8_H12 PGS00044_A_H12	L1L2_gt2	1	2
MGI:2152889	Dner	1	-	182631	FALSE	Conditional Ready	Promotorless	EUCOMM	PCS00135_C_E04	MOHFA50008_A_2_B08 MOHFA50008_A_1_B12 MOHFA50008_A_7_B07 MOHFA50008_A_3_B08 MOHFA50008_A_4_B04 MOHFA50008_A_2_B04 MOHFA50008_A_1_B08 MOHFA50008_A_4_B08 MOHFA50008_A_8_B02 MOHFA50008_A_8_B06 MOHFA50008_A_6_B05 MOHFA50008_A_1_A11 MOHFA50008_A_1_B02 MOHFA50008_A_2_B02 MOHFA50008_A_6_B08 MOHFA50008_A_7_B12 MOHFA50008_A_5_B04 MOHFA50008_A_4_B06 MOHFA50008_A_7_B06 MOHFA50008_A_4_B12 MOHFA50008_A_2_B06 …	L1L2_gt0	1	49
MGI:94912	Dnmt1	9	-	170606	FALSE	Conditional Ready	Promotorless	KOMP-CSD	PCS00148_A_F02	MOHFA50001_D_7_D04 MOHFA50001_D_1_D04 MOHFA50001_D_8_D04 MOHFA50001_D_3_D04 MOHFA50001_D_6_D05 MOHFA50001_D_2_D04 PLNS50001_D_D11 MOHFA50001_D_4_D04	L1L2_gt0	1	8
MGI:1859287	Dnmt3l	10	+	47363	FALSE	Conditional Ready	Promotorless	EUCOMM	PCS00013_A_A04	PGS00013_A_A02	L1L2_gt1	1	1
MGI:1100497	Doc2b	11	-	33826	TRUE	Conditional Ready	Promotorless	EUCOMM	PCS00011_A_H08	PG00011_A_3_H08 PGS00011_A_H08	L1L2_gt1	1	2
MGI:1890621	Donson	16	-	40897	FALSE	Conditional Ready	Promotorless	EUCOMM	PCS00026_B_F09	PG00026_B_1_F09 PG00026_B_5_F09 PGS00026_B_F09	L1L2_gt0	1	3
MGI:2143886	Dot1l	10	+	39800	FALSE	Conditional Ready	Promotorless	KOMP-CSD	PCS00019_A_H04	PGS00019_A_H04 PG00019_A_1_H04	L1L2_gt0	1	2
MGI:2143886	Dot1l	10	+	47359	FALSE	Conditional Ready	Promotorless	KOMP-CSD	PCS00013_A_G05	PGS00013_A_A11	L1L2_gtk	1	1
MGI:2151233	Dph1	11	-	337	FALSE	Conditional Ready	Promotorless	EUCOMM	PCS00016_A_E11	PGS00016_A_E11 PG00016_B_2_E11	L1L2_gt2	1	2
MGI:1916990	Dph5	3	+	40887	FALSE	Conditional Ready	Promotorless	KOMP-CSD	PCS00026_B_F04	PGS00026_B_F04 PGS00026_A_F04 PG00026_A_3_F04 PG00026_A_4_F04 PG00026_B_7_F04	L1L2_gt0	1	5
MGI:2442409	Dpp10	1	-	39989	TRUE	Conditional Ready	Promotorless	EUCOMM	PCS00029_A_A08	PG00029_A_1_A08 PGS00029_A_A08	L1L2_gt0	1	2
MGI:94919	Dpp4	2	-	39314	FALSE	Conditional Ready	Promotorless	EUCOMM	PCS00042_A_C09	PG00042_A_1_C09 PG00042_A_2_C09 PG00042_A_3_C09 PGS00042_A_C09	L1L2_st0	1	4
MGI:2157522	Dppa1	11	-	37733	FALSE	Conditional Ready	Promotorless	KOMP-CSD	PCS00028_A_F07	PGS00028_A_F07 PG00028_B_4_F07 PG00028_B_3_F07	L1L2_st1	1	3
MGI:2157523	Dppa2	16	+	296488	FALSE	Conditional Ready	Promotorless	EUCOMM	PCS00227_A_A03	MOHFA50008_A_8_C01	L1L2_gt1	1	1
MGI:1920958	Dppa3	6	+	214475	FALSE	Conditional Ready	Promotorless	KOMP-CSD	PCS6003_A_G04	PLBS60002_B_E03 PLB60002_B_1_F12	pL1L2_GT1_DelLacZ_bsd	1	2
MGI:2685869	Dpy19l4	4	-	46863	FALSE	Conditional Ready	Promotorless	EUCOMM	PCS00062_A_E11	PG00062_A_1_E11 PG00062_A_1_F11 PG00062_A_2_E11 PGS00062_A_E11	L1L2_gt0 L1L2_st1	1	4
MGI:2139667	Dpyd	3	+	44438	FALSE	Conditional Ready	Promotorless	KOMP-CSD	PCS00049_A_C07	PG00049_A_1_C07 PG00049_A_8_C07 PGS00049_B_C07 PGS00049_A_C07	L1L2_gt2	1	4
MGI:1349763	Dpysl2	14	-	38974	FALSE	Conditional Ready	Promotorless	KOMP-CSD	PCS00027_A_F11	PGS00027_A_F11 PG00027_B_3_F11 PG00027_B_2_F11 PG00027_B_1_F11 PG00027_B_4_F11	L1L2_gt2	1	5
MGI:1917683	Draxin	4	-	39241	TRUE	Conditional Ready	Promotorless	EUCOMM	PCS00011_A_B09 PCS00043_A_B09	PG00011_A_3_B09 PG00011_A_4_B09 PGS00011_A_B09 PGS00043_A_B09 PG00043_A_2_B09	L1L2_gt1 L1L2_st1	2	5
MGI:1343297	Drg1	11	-	36	FALSE	Conditional Ready	Promotorless	EUCOMM	PCS00005_A_A08	PG00005_A_1_A08 PG00005_A_2_A08 PG00005_A_3_A08 PGS00005_A_A08	L1L2_gt1	1	4
MGI:1342307	Drg2	11	+	291	FALSE	Conditional Ready	Promotorless	EUCOMM	PCS00005_A_F10	PG00005_A_1_F10 PG00005_A_2_F09 PG00005_A_2_F10 PG00005_A_3_F09 PG00005_A_3_F10 PG00005_A_4_F10 PGS00005_A_F10	L1L2_gt1	1	7
MGI:107432	Drp2	X	+	41054	FALSE	Conditional Ready	Promotorless	KOMP-CSD	PCS00027_A_G01	PG00027_B_2_F02 PGS00027_A_G01 PG00027_B_2_F01 PG00027_B_4_F01 PG00027_B_2_G01 PG00027_B_3_G01 PG00027_B_1_F01 PG00027_B_3_F02 PG00027_B_4_G01 PG00027_B_1_G01 PG00027_B_1_F02 PG00027_B_3_F01	L1L2_gt0	1	12
MGI:103221	Dsc2	18	-	44818	TRUE	Conditional Ready	Promotorless	KOMP-CSD	PCS00052_A_E11	PG00052_A_6_E11 PG00052_A_7_E11 PG00052_A_8_E11 PGS00052_A_E11	L1L2_st0	1	4
MGI:1919357	Dscc1	15	-	42166	FALSE	Conditional Ready	Promotorless	KOMP-CSD	PCS00036_A_G09	PGS00036_A_G09 PG00036_A_1_G09	L1L2_gt2	1	2
MGI:1196466	Dsg2	18	+	48337	FALSE	Conditional Ready	Promotorless	EUCOMM	PCS00068_A_G11	PLBS60002_B_C11	pL1L2_GT0_DelLacZ_bsd	1	1
MGI:1929270	Dstn	2	+	35270	TRUE	Conditional Ready	Promotorless	KOMP-CSD	PCS00023_E_B02	PGS00023_A_B02 PG00023_C_3_B02 PG00023_C_1_B02 PG00023_C_2_B02 PG00023_E_3_B02 PGS00023_E_B02 PG00023_E_4_B02	L1L2_gt0	1	7
MGI:3036280	Duox2	2	-	44076	FALSE	Conditional Ready	Promotorless	KOMP-CSD	PCS00048_A_F11	PG00048_A_1_F11 PG00048_A_2_F11 PG00048_A_4_F11 PGS00048_A_F11 PG00048_A_3_F11	L1L2_st0	1	5
MGI:1919352	Dusp11	6	-	42136	FALSE	Conditional Ready	Promotorless	EUCOMM	PCS00038_A_F07	PG00038_A_2_F07 PG00038_A_4_F07 PGS00038_A_F07	L1L2_gt2	1	3
MGI:1934928	Dusp15	2	-	35349	FALSE	Conditional Ready	Promotorless	KOMP-CSD	PCS00021_A_B08	PG00021_C_3_B08 PG00021_C_4_B08 PGS00021_B_B08 PG00021_C_1_B08 PG00021_C_2_B08 PGS00021_A_B08	L1L2_st0 L1L2_gt0	1	6
MGI:1917936	Dusp16	6	-	43191	FALSE	Conditional Ready	Promotorless	EUCOMM	PCS00047_A_B03	PG00047_A_3_B03 PG00047_A_4_B03 PGS00047_A_B03 PG00047_A_2_B03	L1L2_gt0	1	4
MGI:1915926	Dusp22	13	+	32	FALSE	Conditional Ready	Promotorless	EUCOMM	PCS00004_A_B03 PCS00034_A_B03	PG00004_A_1_B03 PG00004_A_3_B03 PG00004_A_4_B03 PGS00004_A_B03 PG00034_A_5_G10 PGS00034_A_B03 PG00004_A_2_B03	L1L2_gt0	2	7
MGI:1919599	Dusp3	11	-	43878	FALSE	Conditional Ready	Promotorless	KOMP-CSD	PCS00048_A_B06	PG00048_A_1_B06 PGS00048_A_B06 PG00048_A_3_B06	L1L2_gt2	1	3
MGI:2387107	Dusp9	X	+	40946	TRUE	Conditional Ready	Promotorless	EUCOMM	PCS00026_B_H04	PG00026_B_7_H04 PG00026_B_8_H04 PGS00026_B_H04 PG00026_B_4_H04	L1L2_gt0	1	4
MGI:2387107	Dusp9	X	+	42676	TRUE	Conditional Ready	Promotorless	EUCOMM	PCS00037_A_B11	PGS00037_A_B11	L1L2_gt1	1	1
MGI:94941	Dvl1	4	+	43022	FALSE	Conditional Ready	Promotorless	EUCOMM	PCS00046_A_C08	PG00046_A_1_C08 PG00046_A_3_C08 PG00046_A_4_C08 PGS00046_A_C08	L1L2_gt2	1	4
MGI:107743	Dync1i1	6	+	42084	FALSE	Conditional Ready	Promotorless	KOMP-CSD	PCS00036_A_C08	PGS00036_A_C08 PG00036_A_3_C08 PG00036_A_1_C08 PG00036_A_2_C08 PG00036_A_4_C08	L1L2_gt2	1	5
MGI:107750	Dync1i2	2	+	39345	FALSE	Conditional Ready	Promotorless	EUCOMM	PCS00042_A_D07	PG00042_A_2_D07 PG00042_A_3_D07 PGS00042_A_D07 PG00042_A_4_D07	L1L2_gt0	1	4
MGI:1919757	Dzip1l	9	+	42107	FALSE	Conditional Ready	Promotorless	KOMP-CSD	PCS00036_A_D04	PG00036_A_1_D04 PGS00036_A_D04 PG00036_A_3_D04 PG00036_A_4_D04 PG00036_A_2_D04	L1L2_gt0	1	5
MGI:2442164	E130308A19Rik	4	+	47050	FALSE	Conditional Ready	Promotorless	EUCOMM	PCS00064_A_H01	PG00064_A_1_H01 PG00064_A_2_H01 PG00064_A_3_H01 PG00064_A_4_H01 PGS00064_A_H01	L1L2_gt0	1	5
MGI:1096341	E2f2	4	+	540	FALSE	Conditional Ready	Promotorless	EUCOMM	PCS00007_A_E08	PGS00007_A_E08	L1L2_gt0	1	1
MGI:1096340	E2f3	13	-	38909	FALSE	Conditional Ready	Promotorless	KOMP-CSD	PCS00023_E_F01	PGS00023_E_F01 PG00023_D_1_F01 PG00023_E_1_F01 PGS00023_A_F01 PG00023_D_3_F01 PG00023_D_4_F01 PG00023_E_2_F01 PG00023_D_2_F01 PG00023_E_3_F01	L1L2_gt0	1	9
MGI:1354159	E2f6	12	+	212017	FALSE	Conditional Ready	Promotorless	EUCOMM	PCTS00150_A_E10	MOHFA50001_D_1_F11 MOHFA50001_D_8_F11	L1L2_gt1	1	2
MGI:2444256	E330009J07Rik	6	-	41614	TRUE	Conditional Ready	Promotorless	KOMP-CSD	PCS00031_A_E06	PG00031_B_1_E06 PGS00031_A_E06	L1L2_gt1	1	2
MGI:1914667	Ears2	7	-	43920	FALSE	Conditional Ready	Promotorless	EUCOMM	PCS00051_A_E07	PG00051_A_1_D06 PG00051_A_1_E07 PG00051_A_2_D06 PG00051_A_2_E07 PG00051_A_3_E07 PG00051_A_4_E07 PGS00051_A_E07 PG00051_A_3_D06	L1L2_gt1	1	8
MGI:95275	Ebf1	11	+	254	FALSE	Conditional Ready	Promotorless	EUCOMM	PCS00004_A_G03 PCS00034_A_G03	PG00004_A_1_G03 PG00004_A_2_G03 PG00004_A_3_G03 PG00004_A_4_G03 PGS00004_A_G03 PG00034_A_4_B10 PGS00034_A_G03	L1L2_gt0	2	7
MGI:1915106	Echdc3	2	-	33958	FALSE	Conditional Ready	Promotorless	KOMP-CSD	PCS00027_A_H09	PG00027_B_3_H09 PGS00027_A_H09	L1L2_gt2	1	2
MGI:95281	Ect2	3	-	40131	FALSE	Conditional Ready	Promotorless	EUCOMM	PCS00030_B_A05	PG00030_B_3_A05 PG00030_B_4_A05 PG00030_C_1_A05 PG00030_C_3_A05 PG00030_C_4_A05 PGS00030_B_A05 PGS00030_C_A05 PG00030_C_2_A05	L1L2_gt1	1	8
MGI:1343498	Edar	10	-	43507	TRUE	Conditional Ready	Promotorless	KOMP-CSD	PCS00045_A_H08	PG00045_B_3_H08 PGS00045_D_H08 PG00045_D_4_H08 PG00045_B_1_H08 PGS00045_A_H08 PG00045_D_2_H08 PG00045_A_8_H08 PG00045_B_4_H08	L1L2_st0	1	8
MGI:1915540	Edem2	2	-	39506	FALSE	Conditional Ready	Promotorless	EUCOMM	PCS00011_A_G03	PG00011_A_3_G03 PGS00011_A_G03	L1L2_gt0	1	2
MGI:95286	Eed	7	-	40427	FALSE	Conditional Ready	Promotorless	EUCOMM	PCS00030_B_G06	PG00030_A_1_F06 PG00030_B_2_G06 PG00030_B_4_G06 PG00030_C_1_G06 PG00030_C_2_G06 PG00030_C_3_G06 PGS00030_B_G06 PGS00030_C_G06 PGS00030_A_G06	L1L2_gt1	1	9
MGI:1096317	Eef1a2	2	-	35669	FALSE	Conditional Ready	Promotorless	KOMP-CSD	PCS00021_A_E09	PGS00021_A_E09	L1L2_gt0	1	1
MGI:1917761	Eef2kmt	16	-	46166	FALSE	Conditional Ready	Promotorless	EUCOMM	PCS00060_A_C03	PG00060_A_2_C03 PG00060_A_3_C03 PG00060_A_4_C03 PGS00060_A_C03	L1L2_gt0	1	4
MGI:1921607	Efhd1	1	+	47558	FALSE	Conditional Ready	Promotorless	EUCOMM	PCS00069_A_C07	PLBS60002_B_C07 MOHFA50008_A_5_D04 MOHFA50008_A_8_D04 MOHFA50008_A_5_D02 MOHFA50008_A_5_E05 MOHFA50008_A_2_D06 MOHFA50008_A_8_D03 MOHFA50008_A_3_D04 MOHFA50008_A_2_D02 MOHFA50008_A_1_D04 MOHFA50008_A_7_D04 MOHFA50008_A_6_E04	pL1L2_GT2_DelLacZ_bsd L1L2_gt2	2	12
MGI:103236	Efna1	3	-	46844	FALSE	Conditional Ready	Promotorless	EUCOMM	PCS00063_A_F10	PG00063_B_2_F11 PG00063_B_3_F10 PGS00063_A_F10	L1L2_st0	1	3
MGI:95294	Egfr	11	+	224	FALSE	Conditional Ready	Promotorless	EUCOMM	PCS00005_A_E10 PCS00035_A_E10	PG00005_A_1_E10 PG00005_A_2_E10 PG00005_A_3_E10 PGS00005_A_E10 PG00035_A_1_F10 PG00035_A_2_F10 PG00035_A_3_E10 PG00035_A_4_E10 PGS00035_A_E10 PG00035_A_2_E10	L1L2_gt1 L1L2_st1	2	10
MGI:2667252	Ehbp1	11	-	230	FALSE	Conditional Ready	Promotorless	EUCOMM	PCS00034_A_F05	PG00034_A_8_C08 PGS00034_A_F05	L1L2_st0 L1L2_gt0	1	2
MGI:1349431	Eif2s3x	X	-	40710	FALSE	Conditional Ready	Promotorless	EUCOMM	PCS00033_A_C08	PG00033_A_1_C08 PG00033_A_1_E10 PG00033_A_2_D10 PG00033_A_4_D10 PGS00033_A_C08	L1L2_gt1	1	5
MGI:1913335	Eif3f	7	+	44424	FALSE	Conditional Ready	Promotorless	EUCOMM	PCS00054_B_C01	PG00054_A_2_C01 PG00054_A_4_C01 PGS00054_A_C01 PG00054_A_1_C01	L1L2_gt1	1	4
MGI:95303	Eif4a1	11	-	46982	FALSE	Conditional Ready	Promotorless	EUCOMM	PCS00064_A_F01	PG00064_A_2_F01 PG00064_A_3_F01 PG00064_A_4_F01 PGS00064_A_F01	L1L2_gt0	1	4
MGI:1923731	Eif4a3	11	-	152	FALSE	Conditional Ready	Promotorless	EUCOMM	PCS00005_A_D04	PLB60002_B_2_E03 PLBS60002_B_A05 PG00005_A_1_D04 PG00005_A_2_D04 PG00005_A_3_D04 PG00005_A_4_D04 PGS00005_A_D04	pL1L2_GT1_DelLacZ_bsd L1L2_gt1	1	7
MGI:1914142	Eif4e3	6	-	41583	FALSE	Conditional Ready	Promotorless	KOMP-CSD	PCS00031_A_G07	PGS00031_A_G07 PG00031_A_2_G07	L1L2_gt2	1	2
MGI:1921453	Eif4enif1	11	+	37463	FALSE	Conditional Ready	Promotorless	KOMP-CSD	PCS00023_E_G01	PG00023_E_2_G01 PGS00023_E_G01 PG00023_E_1_G01	L1L2_gt0	1	3
MGI:1890496	Elac2	11	+	33806	FALSE	Conditional Ready	Promotorless	EUCOMM	PCS00043_A_E11	PG00043_A_1_E11 PG00043_A_4_E11 PGS00043_A_E11	L1L2_gt1	1	3
MGI:1100887	Elavl2	4	-	36361	TRUE	Conditional Ready	Promotorless	KOMP-CSD	PCS00023_E_E11	PGS00023_A_E11 PG00023_C_1_E11 PG00023_E_3_E11 PG00023_D_2_E10 PGS00023_E_E11	L1L2_gt1	1	5
MGI:109157	Elavl3	9	-	85434	FALSE	Conditional Ready	Promotorless	EUCOMM	PCP10002_A_A02 PCS00088_A_B12	PFA0002_A_1_A02 PFA0002_A_2_A02 PFA0002_A_6_A02 MOHFA50008_A_1_D09 MOHFA50008_A_4_D07 MOHFA50008_A_8_D08 MOHFA50008_A_2_D10 MOHFA50008_A_3_D07 MOHFA50008_A_4_D10 MOHFA50008_A_1_D10 MOHFA50008_A_8_D10	L1L2_gt0	2	11
MGI:1916507	Elf2	3	-	40126	FALSE	Conditional Ready	Promotorless	EUCOMM	PCS00026_B_F05	PG00026_A_1_F05 PG00026_A_2_F05 PG00026_B_7_F05 PGS00026_B_F05 PGS00026_A_F05	L1L2_gt1	1	5
MGI:102853	Elk4	1	+	43416	FALSE	Conditional Ready	Promotorless	EUCOMM	PCS00050_A_F02	PG00050_A_3_F02 PG00050_A_4_F02 PG00050_A_5_F02 PGS00050_A_F02	L1L2_gt0	1	4
MGI:2445168	Elmod3	6	-	43485	FALSE	Conditional Ready	Promotorless	EUCOMM	PCS00047_A_B05	PG00047_A_1_B05 PG00047_A_3_B05 PG00047_A_4_B05 PGS00047_A_B05 PG00047_A_2_B05	L1L2_gt0	1	5
MGI:1925016	Elp4	2	-	40231	FALSE	Conditional Ready	Promotorless	EUCOMM	PCS00030_B_F11	PG00030_B_3_F11 PG00030_B_4_F11 PG00030_B_4_G12 PG00030_C_1_F11 PGS00030_C_F11 PG00030_B_1_G12	L1L2_gt2	1	6
MGI:1859017	Elp5	11	-	33812	TRUE	Conditional Ready	Promotorless	EUCOMM	PCS00044_A_H10	PG00044_A_5_H10 PG00044_A_6_H10 PGS00044_A_H10	L1L2_gt2	1	3
MGI:2155091	Emid1	11	-	212	FALSE	Conditional Ready	Promotorless	EUCOMM	PCS00005_A_E03 PCS00035_A_E03	PG00005_A_1_E03 PG00005_A_3_E03 PG00005_A_4_E03 PGS00005_A_E03 PG00035_A_1_E03 PG00035_A_3_E03 PG00035_A_4_E03 PG00005_A_2_E03 PG00035_A_2_E03 PGS00035_A_E03	L1L2_gt1 L1L2_st1	2	10
MGI:2444688	Endov	11	+	158	FALSE	Conditional Ready	Promotorless	EUCOMM	PCS00004_A_D12 PCS00034_A_D12	PG00004_A_1_D12 PG00004_A_2_D12 PG00004_A_4_D12 PGS00004_A_D12 PG00034_A_3_E01 PG00034_A_8_E01 PGS00034_A_D12 PG00004_A_3_D12	L1L2_gt0	2	8
MGI:2384799	Enox2	X	-	40704	FALSE	Conditional Ready	Promotorless	EUCOMM	PCS00033_A_F10	PG00033_A_4_F10 PGS00033_A_F10	L1L2_gt1	1	2
MGI:102805	Entpd1	19	+	47236	FALSE	Conditional Ready	Promotorless	EUCOMM	PCS00063_A_H11	PG00063_B_2_H11 PG00063_B_3_H11 PGS00063_A_H11	L1L2_st0	1	3
MGI:1321386	Entpd3	9	+	43897	FALSE	Conditional Ready	Promotorless	KOMP-CSD	PCS00045_A_B10	PG00045_D_1_B10 PG00045_D_4_B10 PGS00045_D_B10 PG00045_D_3_B10 PG00045_A_5_B10 PG00045_A_8_B10	L1L2_st0	1	6
MGI:1202295	Entpd6	2	+	35296	FALSE	Conditional Ready	Promotorless	KOMP-CSD	PCS00020_A_C10	PGS00020_A_C10 PG00020_A_1_C10 PG00020_A_3_C10 PG00020_A_2_C10	L1L2_gt1	1	4
MGI:2135885	Entpd7	19	+	44804	FALSE	Conditional Ready	Promotorless	EUCOMM	PCS00054_B_H10	PG00054_A_2_H10 PG00054_A_4_H10 PGS00054_A_H10	L1L2_gt2	1	3
MGI:1276124	Ep400	5	-	39807	FALSE	Conditional Ready	Promotorless	EUCOMM		MOHFA50008_A_6_E06 MOHFA50008_A_3_E08 MOHFA50008_A_1_F09 MOHFA50008_A_7_E01 MOHFA50008_A_7_E07 MOHFA50008_A_8_E08 MOHFA50008_A_1_E12 MOHFA50008_A_7_E08 MOHFA50008_A_5_E09 MOHFA50008_A_5_E06 MOHFA50008_A_2_E12 MOHFA50008_A_2_E11 MOHFA50008_A_1_E09 MOHFA50008_A_6_E08 MOHFA50008_A_8_E09 MOHFA50008_A_7_E10	L1L2_gt0	1	16
MGI:1276124	Ep400	5	-	366736	FALSE	Conditional Ready	Promotorless	EUCOMM	PCS00239_A_C07	MOHFA50008_A_6_F11 MOHFA50008_A_7_F11	L1L2_gt1	1	2
MGI:1859149	Epb41l4b	4	-	33852	FALSE	Conditional Ready	Promotorless	EUCOMM	PCS00042_A_E07	PG00042_A_1_E07 PG00042_A_2_E07 PGS00042_A_E07	L1L2_gt0	1	3
MGI:1278322	Epc1	18	-	39627	FALSE	Conditional Ready	Promotorless	EUCOMM	PCS00001_A_E01	PGS00001_A_E01	L1L2_gt0	1	1
MGI:1278321	Epc2	2	+	47364	FALSE	Conditional Ready	Promotorless	EUCOMM	PCS00013_A_A01	PGS00013_A_A01	L1L2_gtk	1	1
MGI:3586824	Epha10	4	+	41280	FALSE	Conditional Ready	Promotorless	KOMP-CSD	PCS00028_A_A08	PGS00028_A_A08 PG00028_B_1_A08	L1L2_st1	1	2
MGI:95276	Epha7	4	+	35911	TRUE	Conditional Ready	Promotorless	KOMP-CSD	PCS00021_A_B03	PG00021_B_2_B03 PG00021_B_4_B03 PGS00021_A_B03 PGS00021_B_B03	L1L2_st0 L1L2_gt0	1	4
MGI:109378	Epha8	4	-	534	FALSE	Conditional Ready	Promotorless	EUCOMM	PCS00007_A_B08 PCS00017_A_B08	PG00007_B_1_B08 PG00007_B_2_B08 PG00007_B_4_B08 PGS00007_A_B08 PG00017_B_4_B08 PGS00017_A_B08 PG00017_B_2_B08 PG00017_B_3_B08 PG00007_B_3_B08	L1L2_gt0 L1L2_st0	2	9
MGI:1096337	Ephb1	9	-	40317	FALSE	Conditional Ready	Promotorless	EUCOMM	PCS00029_A_G05	PG00029_A_1_G05 PG00029_A_3_G05 PGS00029_A_G05	L1L2_gt0	1	3
MGI:1919139	Epn3	11	-	38395	FALSE	Conditional Ready	Promotorless	KOMP-CSD	PCS00020_A_E04	PG00020_A_4_E04 PGS00020_A_E04 PG00020_A_3_E04	L1L2_gt1	1	3
MGI:104583	Eps15	4	+	36568	FALSE	Conditional Ready	Promotorless	KOMP-CSD	PCS00023_E_H03	PG00023_C_3_G03 PG00023_C_4_G03 PG00023_E_3_H03 PGS00023_A_H03 PG00023_D_3_H03 PG00023_C_3_H03 PG00023_D_1_G03 PG00023_E_1_H03 PGS00023_E_H03 PG00023_C_1_H03 PG00023_C_2_H03 PG00023_D_1_H03 PG00023_D_2_G03 PG00023_D_2_H03 PG00023_C_1_G03 PG00023_C_2_G03 PG00023_C_4_H03 PG00023_D_4_G03	L1L2_gt0	1	18
MGI:95410	Erbb2	11	+	96	FALSE	Conditional Ready	Promotorless	EUCOMM	PCS00005_A_C01 PCS00035_A_C01	PG00005_A_1_C01 PG00005_A_2_C01 PG00005_A_3_C01 PG00005_A_4_C01 PGS00005_A_C01 PG00035_A_3_C01 PGS00035_A_C01	L1L2_gt1 L1L2_st1	2	7
MGI:95413	Ercc2	7	+	47198	FALSE	Conditional Ready	Promotorless	EUCOMM	PCS00063_A_E08	PG00063_B_1_H07 PG00063_B_4_E08 PGS00063_A_E08	L1L2_gt1 L1L2_gt2	1	3
MGI:1354163	Ercc4	16	+	43474	FALSE	Conditional Ready	Promotorless	EUCOMM	PCS00054_B_A05	PG00054_A_1_A05 PG00054_A_3_A05 PGS00054_A_A05	L1L2_gt2	1	3
MGI:1354385	Ero1l	14	-	179016	FALSE	Conditional Ready	Promotorless	KOMP-CSD	PCS00134_A_D03	MOHFA50008_A_4_F12 MOHFA50008_A_3_F12	L1L2_gt0	1	2
MGI:1923549	Erp44	4	-	36118	FALSE	Conditional Ready	Promotorless	KOMP-CSD	PCS00023_E_H02	PGS00023_E_H02 PG00023_E_4_H02 PG00023_C_2_H02 PG00023_D_3_H02 MPGS8004_A_D10 PG00023_C_3_H02 PGS00023_A_H02 PG00023_D_4_H02 PG00023_D_1_H02	L1L2_st0	1	9
MGI:1921405	Errfi1	4	+	46527	TRUE	Conditional Ready	Promotorless	EUCOMM	PCS00062_A_A07	PG00062_A_2_A07 PG00062_A_3_A07 PG00062_A_4_A07 PGS00062_A_A07	L1L2_gt1	1	4
MGI:1861630	Espn	4	-	40631	FALSE	Conditional Ready	Promotorless	EUCOMM	PCS00026_B_G01	PG00026_A_1_H01 PG00026_A_3_G01 PG00026_A_3_H01 PG00026_A_4_H01 PGS00026_A_G01 PGS00026_B_G01	L1L2_gt0	1	6
MGI:109392	Esr2	12	-	40116	FALSE	Conditional Ready	Promotorless	EUCOMM	PCS00030_B_C09	PG00030_B_2_C09 PG00030_C_2_C09 PG00030_C_3_C09 PG00030_C_4_C09 PGS00030_B_C09 PGS00030_C_C09 PG00030_C_1_C09	L1L2_gt2	1	7
MGI:1917326	Esrp1	4	-	169	FALSE	Conditional Ready	Promotorless	EUCOMM	PCS00004_A_E04	PG00004_A_1_E04 PG00004_A_2_E04 PG00004_A_3_E04 PG00004_A_4_E04 PGS00004_A_E04	L1L2_gt0	1	5
MGI:106092	Etfa	9	-	44826	FALSE	Conditional Ready	Promotorless	KOMP-CSD	PCS00052_A_F01	PG00052_A_7_F01 PGS00052_A_F01 PG00052_A_1_F01 PG00052_A_8_F01	L1L2_gt0	1	4
MGI:99423	Etv4	11	-	83	FALSE	Conditional Ready	Promotorless	EUCOMM	PCS00005_A_B08	PG00005_A_1_B08 PG00005_A_2_B08 PGS00005_A_B08	L1L2_gt1	1	3
MGI:2385247	Eva1a	6	+	45240	FALSE	Conditional Ready	Promotorless	KOMP-CSD	PCS00055_A_F07	PGS00055_A_F07 PG00055_A_2_F07 PGS00055_B_F07	L1L2_gt1	1	3
MGI:1913732	Exoc2	13	-	38904	FALSE	Conditional Ready	Promotorless	KOMP-CSD	PCS00021_A_G12	PGS00021_A_G12	L1L2_gt1	1	1
MGI:1096376	Exoc4	6	+	37346	FALSE	Conditional Ready	Promotorless	KOMP-CSD	PCS00021_A_B07	PGS00021_B_B07 PGS00021_A_B07 PG00021_B_3_B07	L1L2_st0 L1L2_gt0	1	3
MGI:1859270	Exoc7	11	-	153	FALSE	Conditional Ready	Promotorless	EUCOMM	PCS00004_A_D11 PCS00034_A_D11	PG00004_A_2_D11 PG00004_A_3_D11 PG00004_A_4_D11 PGS00004_A_D11 PG00034_A_1_E02 PG00034_A_3_E02 PG00034_A_6_E02 PG00034_A_8_E02 PGS00034_A_D11 PG00004_A_1_D11	L1L2_gt0	2	10
MGI:1916889	Exosc8	3	-	47080	FALSE	Conditional Ready	Promotorless	EUCOMM	PCS00064_A_E04	PG00064_A_2_E04	L1L2_gt0	1	1
MGI:1888742	Extl1	4	-	44406	FALSE	Conditional Ready	Promotorless	EUCOMM	PCS00054_B_E12	PG00054_A_3_E12 PG00054_A_2_E12	L1L2_st2	1	2
MGI:109341	Eya2	2	+	29455	FALSE	Conditional Ready	Promotorless	EUCOMM	PCS00008_A_D05	PG00008_A_2_D05 PG00008_A_3_D05 PGS00008_A_D05 PG00008_A_1_D05	L1L2_gt0	1	4
MGI:107940	Ezh2	6	-	40378	FALSE	Conditional Ready	Promotorless	EUCOMM	PCS00029_A_E07	PG00029_A_1_E07 PG00029_A_3_E06 PG00029_A_3_E07 PG00029_A_4_E06 PG00029_A_4_E07 PGS00029_A_E07 MOHFA50008_A_5_G12 MOHFA50008_A_6_H02 MOHFA50008_A_1_H01 MOHFA50008_A_6_G10 MOHFA50008_A_4_H01 MOHFA50008_A_8_H01 MOHFA50008_A_2_H01 MOHFA50008_A_6_H01 MOHFA50008_A_6_G12 MOHFA50008_A_5_G11 MOHFA50008_A_7_H02 MOHFA50008_A_8_G12 MOHFA50008_A_7_H01 MOHFA50008_A_3_G01 MOHFA50008_A_8_H02 MOHFA50008_A_5_H01	L1L2_gt0	2	22
MGI:98931	Ezr	17	-	40493	TRUE	Conditional Ready	Promotorless	EUCOMM	PCS00037_A_C10	PG00037_A_1_C10 PG00037_A_2_C10 PG00037_A_4_C10 PGS00037_A_C10 MPGS8003_A_G10	L1L2_gt2	1	5
MGI:98931	Ezr	17	-	40831	TRUE	Conditional Ready	Promotorless	EUCOMM	PCS00026_B_F12	PG00026_A_1_G12 PG00026_A_1_F12 PG00026_A_2_A12 PG00026_A_2_G12 PG00026_A_4_A12 PG00026_A_4_G12 PG00026_A_4_H09 PGS00026_A_F12 PGS00026_B_F12	L1L2_gt2	1	9
MGI:1919135	Faap100	11	-	44170	FALSE	Conditional Ready	Promotorless	KOMP-CSD	PCS00048_A_H06	PG00048_A_2_H06 PG00048_A_3_H06 PGS00048_A_H06 PG00048_A_1_H06 PG00048_A_4_H06	L1L2_gt2	1	5
MGI:1922747	Fabp12	3	-	45826	FALSE	Conditional Ready	Promotorless	EUCOMM	PCS00060_A_C06	PG00060_A_1_C06 PG00060_A_2_C06 PG00060_A_4_C06 PGS00060_A_C06	L1L2_gt1	1	4
MGI:95476	Fabp3	4	+	39166	FALSE	Conditional Ready	Promotorless	EUCOMM	PCS00043_A_F05	PG00043_A_2_F05 PGS00043_A_F05 PG00043_A_4_F05	L1L2_gt1	1	3
MGI:96565	Fabp6	11	-	251	FALSE	Conditional Ready	Promotorless	EUCOMM	PCS00005_A_F04 PCS00035_A_F04	PG00005_A_1_F04 PG00005_A_2_F04 PG00005_A_3_F04 PG00005_A_4_F04 PGS00005_A_F04 PG00035_A_1_F04 PG00035_A_2_F04 PGS00035_A_F04 PG00035_A_4_F04	L1L2_gt1	2	9
MGI:3039592	Fads6	11	-	147	FALSE	Conditional Ready	Promotorless	EUCOMM	PCS00005_A_C12	PG00005_A_1_C12 PG00005_A_2_C12 PG00005_A_3_C12 PG00005_A_4_C12 PGS00005_A_C12	L1L2_gt1	1	5
MGI:1915376	Fahd2a	2	-	35146	FALSE	Conditional Ready	Promotorless	EUCOMM	PCS00028_A_B11	PG00028_B_2_B11 PGS00028_A_B11	L1L2_gt2	1	2
MGI:106351	Fam104a	11	-	132	FALSE	Conditional Ready	Promotorless	EUCOMM	PCS00006_A_C07 PCS00016_A_C07	PLB60002_B_3_G04 PLB60002_B_4_G04 PLBS60002_B_A04 PG00016_B_1_C07 PG00016_B_2_C07 PG00016_B_3_C07 PG00016_B_4_C07 PGS00016_A_C07 PGS00006_A_C02	pL1L2_GT2_DelLacZ_bsd L1L2_gt2	2	9
MGI:1913790	Fam107b	2	+	44323	FALSE	Conditional Ready	Promotorless	KOMP-CSD	PCS00052_A_D05	PG00052_A_7_D05 PG00052_A_5_D05 PG00052_A_8_D05 PG00052_A_1_D05 PG00052_A_6_D05 PGS00052_A_D05	L1L2_gt2	1	6
MGI:1915553	Fam114a1	5	+	42016	FALSE	Conditional Ready	Promotorless	KOMP-CSD	PCS00036_A_F02	PG00036_A_1_F02 PGS00036_A_F02	L1L2_gt0	1	2
MGI:1920000	Fam117b	1	+	40062	FALSE	Conditional Ready	Promotorless	EUCOMM	PCS00029_A_F09	PG00029_A_2_F09 PG00029_A_3_F09 PG00029_A_4_F09 PGS00029_A_F09	L1L2_gt1	1	4
MGI:2387687	Fam120c	X	+	40737	FALSE	Conditional Ready	Promotorless	EUCOMM	PCS00033_A_F01	PG00033_A_4_F01 PG00033_A_1_F01 PG00033_A_3_F01 PGS00033_A_F01	L1L2_gt0	1	4
MGI:1926005	Fam122b	X	-	40664	FALSE	Conditional Ready	Promotorless	EUCOMM	PCS00038_A_A06	PG00038_A_1_A06 PG00038_A_2_A06 PG00038_A_3_A06 PGS00038_A_A06	L1L2_gt2	1	4
MGI:2149839	Fam126a	5	-	40799	FALSE	Conditional Ready	Promotorless	EUCOMM	PCS00030_B_A08	PG00030_C_2_A08 PG00030_C_3_A08 PG00030_C_4_A08 PGS00030_C_A08	L1L2_gt0	1	4
MGI:2137237	Fam129a	1	+	48482	FALSE	Conditional Ready	Promotorless	EUCOMM	PCS00073_A_B01	PLBS60002_B_C12	pL1L2_GT0_DelLacZ_bsd	1	1
MGI:2685539	Fam131c	4	+	44294	FALSE	Conditional Ready	Promotorless	KOMP-CSD	PCS00048_A_G02	PG00048_A_3_G02 PGS00048_A_G02	L1L2_gt0	1	2
MGI:1915248	Fam134c	11	-	95	FALSE	Conditional Ready	Promotorless	EUCOMM	PCS00006_A_B11 PCS00016_A_B11	PLB60002_B_1_G03 PG00016_B_1_B11 PLB60002_B_4_H02 PGS00006_A_B09 PGS00016_A_B11	pL1L2_GT2_DelLacZ_bsd L1L2_st2 L1L2_gt2	2	5
MGI:2657115	Fam151a	4	+	36494	FALSE	Conditional Ready	Promotorless	KOMP-CSD	PCS00020_A_B07	PG00020_A_2_C06 PGS00020_A_B07 PG00020_A_3_B07	L1L2_st1	1	3
MGI:2443027	Fam161b	12	-	42181	FALSE	Conditional Ready	Promotorless	KOMP-CSD	PCS00036_A_C10	PGS00036_A_C10 PG00036_A_2_C10	L1L2_gt2	1	2
MGI:1926116	Fam175b	7	+	44040	FALSE	Conditional Ready	Promotorless	EUCOMM	PCS00046_A_A11	PG00046_A_2_A11 PG00046_A_4_A11 PGS00046_A_A11	L1L2_st0	1	3
MGI:1922679	Fam183b	11	-	283	TRUE	Conditional Ready	Promotorless	EUCOMM	PCS00005_A_F08	PG00005_A_1_F08 PG00005_A_3_F08 PG00005_A_4_F08 PGS00005_A_F08 PG00005_A_2_F08	L1L2_gt1	1	5
MGI:2140983	Fam185a	5	+	44036	TRUE	Conditional Ready	Promotorless	EUCOMM	PCS00051_A_H09	PG00051_A_4_A11 PGS00051_A_H09	L1L2_gt1	1	2
MGI:2679716	Fam205c	4	-	44211	FALSE	Conditional Ready	Promotorless	KOMP-CSD	PCS00049_A_A11	PGS00049_A_A11 PGS00049_B_A11 PG00049_A_5_A11	L1L2_gt2	1	3
MGI:2677850	Fam206a	4	+	47100	FALSE	Conditional Ready	Promotorless	EUCOMM	PCS00064_A_D08	PG00064_A_1_D08 PG00064_A_2_D08 PGS00064_A_D08	L1L2_gt1	1	3
MGI:1914267	Fam210b	2	+	41833	FALSE	Conditional Ready	Promotorless	KOMP-CSD	PCS00031_A_B01	PG00031_B_1_B01 PGS00031_A_B01	L1L2_gt0	1	2
MGI:1919151	Fam219a	4	-	36019	FALSE	Conditional Ready	Promotorless	KOMP-CSD	PCS00021_A_C03	PGS00021_A_C03 PG00021_A_1_C03 PG00021_A_2_C03 PG00021_C_1_C03 PGS00021_B_C03 PG00021_C_4_C03	L1L2_gt0 L1L2_st0	1	6
MGI:2442161	Fam221a	6	+	45213	FALSE	Conditional Ready	Promotorless	KOMP-CSD	PCS00055_A_F05	PG00055_A_3_F05 PG00055_A_1_F05 PGS00055_B_F05 PG00055_A_2_F05 PGS00055_A_F05	L1L2_gt2	1	5
MGI:2441678	Fam221b	4	-	47032	FALSE	Conditional Ready	Promotorless	EUCOMM	PCS00064_A_D04	PG00064_A_2_D04 PG00064_A_4_D04 PGS00064_A_D04	L1L2_gt0	1	3
MGI:2384939	Fam222b	11	+	38141	FALSE	Conditional Ready	Promotorless	KOMP-CSD	PCS00021_A_C01	PGS00021_B_C01 PGS00021_A_C01	L1L2_st0 L1L2_gt0	1	2
MGI:1923073	Fam227b	2	-	39433	FALSE	Conditional Ready	Promotorless	EUCOMM	PCS00043_A_H03	PG00043_A_1_H03 PG00043_A_2_H03 PGS00043_A_H03	L1L2_gt0	1	3
MGI:1915144	Fam45a	19	+	46173	FALSE	Conditional Ready	Promotorless	EUCOMM	PCS00060_A_A07	PG00060_A_1_A07 PG00060_A_3_A07 PG00060_A_4_A07 PGS00060_A_A07	L1L2_gt1	1	4
MGI:1351626	Fam50a	X	+	40907	FALSE	Conditional Ready	Promotorless	EUCOMM	PCS00033_A_H01	PG00033_A_3_H01	L1L2_gt0	1	1
MGI:1919225	Fam53a	5	-	43516	FALSE	Conditional Ready	Promotorless	EUCOMM	PCS00050_A_A03	PG00050_A_1_A03 PG00050_A_2_A03 PG00050_A_3_A03 PG00050_A_4_A03 PG00050_A_5_A03 PG00050_A_7_A03 PG00050_A_8_A03 PGS00050_A_A03 PG00050_A_6_A03	L1L2_gt0	1	9
MGI:1925188	Fam53b	7	-	41826	FALSE	Conditional Ready	Promotorless	EUCOMM	PCS00032_A_F02	PG00032_A_2_F02 PG00032_A_4_F02 PGS00032_A_F02	L1L2_gt0	1	3
MGI:2151840	Fam57a	11	+	344	FALSE	Conditional Ready	Promotorless	EUCOMM	PCS00006_A_F01 PCS00016_A_F01	PG00006_A_1_E04 PG00006_A_2_E04 PG00006_A_3_E04 PG00006_A_4_E04 PGS00006_A_E04 PG00016_B_1_F01 PG00016_B_2_F01 PG00016_B_3_F01 PGS00016_A_F01 PG00016_B_4_F01	L1L2_gt2 L1L2_st2	2	10
MGI:1922257	Fam63a	3	+	41224	FALSE	Conditional Ready	Promotorless	EUCOMM	PCS00032_A_H02	PG00032_A_1_H01 PG00032_A_1_H02 PG00032_A_2_H01 PG00032_A_2_H02 PGS00032_A_H02	L1L2_gt0	1	5
MGI:1916803	Fam65c	2	-	44079	FALSE	Conditional Ready	Promotorless	KOMP-CSD	PCS00048_A_F06	PG00048_A_1_F06 PG00048_A_4_F06 PG00048_A_2_F06 PG00048_A_3_F06 PGS00048_A_F06	L1L2_gt2	1	5
MGI:3650836	Fam71b	11	+	43399	FALSE	Conditional Ready	Promotorless	KOMP-CSD	PCS00045_A_B03	PG00045_A_5_B03 PG00045_A_8_B03 PGS00045_D_B03 PG00045_D_3_B03 PGS00045_A_B03 PG00045_D_1_B03 PG00045_B_4_B03 PG00045_D_4_B03 PG00045_A_7_B03 PG00045_D_2_B03	L1L2_gt0	1	10
MGI:1916890	Fam83g	11	+	298	FALSE	Conditional Ready	Promotorless	EUCOMM	PCS00004_A_H11 PCS00034_A_H11	PG00004_A_1_H11 PG00004_A_2_H11 PGS00004_A_H11 PG00034_A_1_A02 PGS00034_A_H11	L1L2_gt0	2	5
MGI:1915465	Fam98b	2	+	34887	TRUE	Conditional Ready	Promotorless	KOMP-CSD	PCS00027_A_F12	GR00030_A10	L1L2_gt2	1	1
MGI:2448558	Fancb	X	+	40550	FALSE	Conditional Ready	Promotorless	EUCOMM	PCS00032_A_A12	PG00032_A_1_A12 PG00032_A_1_B06 PG00032_A_1_B07 PG00032_A_1_C05 PG00032_A_2_A11 PG00032_A_2_B06 PG00032_A_3_A11 PG00032_A_3_B07 PG00032_A_3_D02 PG00032_A_4_E08 PG00032_A_4_F07 PGS00032_A_A12 PG00032_A_1_A11 PG00032_A_4_B06	L1L2_gt0 L1L2_gt1 L1L2_gt2	1	14
MGI:2448480	Fancd2	6	+	43555	FALSE	Conditional Ready	Promotorless	EUCOMM	PCS00054_B_D05	PG00054_A_1_D05 PG00054_A_2_D05 PGS00054_A_D05 PG00054_A_4_D05	L1L2_gt2	1	4
MGI:1926471	Fancg	4	-	44444	FALSE	Conditional Ready	Promotorless	EUCOMM	PCS00050_A_A05	PG00050_A_2_A05 PG00050_A_3_A05 PG00050_A_4_A05 PG00050_A_5_A05 PG00050_A_7_A05 PG00050_A_8_A05 PGS00050_A_A05	L1L2_gt0	1	7
MGI:2384790	Fanci	7	+	47097	FALSE	Conditional Ready	Promotorless	EUCOMM	PCS00064_A_E06	PG00064_A_1_E06 PGS00064_A_E06	L1L2_gt1	1	2
MGI:2385126	Farp2	1	+	44844	FALSE	Conditional Ready	Promotorless	KOMP-CSD	PCS00052_A_H01	PG00052_A_8_H01 PGS00052_A_H01 PG00052_A_5_H01	L1L2_gt0	1	3
MGI:95485	Fasn	11	-	119308	FALSE	Conditional Ready	Promotorless	KOMP-CSD	PCP10002_A_B11 PCP10002_A_B08 PCP10002_A_B09 PCP10002_A_B10 PCP10002_A_B07	PFA0002_A_1_B11 PFA0002_A_1_B08 PFA0002_A_1_B09 PFA0002_A_1_B10 PFA0002_A_2_B08 PFA0002_A_2_B11 PFA0002_A_3_B08 PFA0002_A_3_B10 PFA0002_A_4_B08 PFA0002_A_4_B11 PFA0002_A_6_B07 PFA0002_A_7_B08 PFA0002_A_8_B07 PFA0002_A_5_B07 PFA0002_A_3_B11 PFA0002_A_4_B10	L1L2_gt1	5	16
MGI:2685369	Fat2	11	-	278	FALSE	Conditional Ready	Promotorless	EUCOMM	PCS00005_A_F07	PG00005_A_1_F07 PG00005_A_2_F07 PG00005_A_3_F07 PG00005_A_4_F07 PGS00005_A_F07	L1L2_gt1	1	5
MGI:1923382	Faxc	4	+	33753	FALSE	Conditional Ready	Promotorless	EUCOMM	PCS00040_A_H11	PG00040_A_1_H11 PGS00040_A_H11	L1L2_gt2	1	2
MGI:95489	Fbn1	2	-	39432	FALSE	Conditional Ready	Promotorless	EUCOMM	PCS00026_B_F11	PG00026_A_1_F11 PG00026_A_2_F11 PG00026_A_3_F11 PG00026_A_4_F11 PG00026_B_4_F11 PGS00026_A_F11 PGS00026_B_F11	L1L2_st2	1	7
MGI:2686937	Fbxo10	4	-	36009	FALSE	Conditional Ready	Promotorless	KOMP-CSD	PCS00021_A_F04	PGS00021_A_F04 PG00021_A_2_F04 PG00021_B_2_F04 PG00021_A_1_F04 PGS00021_B_F04	L1L2_gt0 L1L2_st0	1	5
MGI:2147134	Fbxo11	17	-	40344	FALSE	Conditional Ready	Promotorless	EUCOMM	PCS00030_B_D03	PG00030_B_3_D03 PG00030_C_3_D03 PG00030_C_4_D03 PGS00030_B_D03 PGS00030_C_D03 PG00030_C_2_D03	L1L2_gt1	1	6
MGI:1354699	Fbxo18	2	-	34040	FALSE	Conditional Ready	Promotorless	KOMP-CSD	PCS00045_A_A01	PG00045_D_1_A01 PG00045_B_4_A01 PGS00045_D_A01 PGS00045_A_A01 PG00045_B_1_A01 PG00045_B_3_A01 PG00045_A_5_A01 PG00045_B_2_A01	L1L2_gt0	1	8
MGI:1929084	Fbxo3	2	+	34741	FALSE	Conditional Ready	Promotorless	KOMP-CSD	PCS00027_A_C09	GR00030_D06	L1L2_gt2	1	1
MGI:3505735	Fbxo39	11	+	44367	FALSE	Conditional Ready	Promotorless	KOMP-CSD	PCS00049_A_D08	PGS00049_B_D08 PG00049_A_1_D08	L1L2_gt2	1	2
MGI:1354696	Fbxo8	8	+	40336	FALSE	Conditional Ready	Promotorless	EUCOMM	PCS00030_B_B08	PG00030_B_2_B08 PG00030_B_4_B08 PG00030_C_1_A06 PG00030_C_1_B08 PG00030_C_2_B08 PGS00030_B_B08 PGS00030_C_B08 PG00030_C_3_B08	L1L2_gt2 L1L2_gt1	1	8
MGI:3052463	Fbxw10	11	+	305	FALSE	Conditional Ready	Promotorless	KOMP-CSD	PCS00034_A_H12	PGS00034_A_H12 PG00034_A_1_A01 PG00034_A_6_A01	L1L2_gt0	1	3
MGI:1353435	Fbxw2	2	-	33643	FALSE	Conditional Ready	Promotorless	EUCOMM	PCS00044_A_A02	PG00044_A_6_A02 PG00044_A_7_A02 PG00044_A_8_A02 PGS00044_A_A02	L1L2_gt1	1	4
MGI:1354695	Fbxw7	3	+	42155	FALSE	Conditional Ready	Promotorless	EUCOMM	PCS00037_A_H12	PLNS50001_D_B08	L1L2_gt2	1	1
MGI:2448475	Fchsd2	7	+	43597	FALSE	Conditional Ready	Promotorless	EUCOMM	PCS00054_B_F05	PG00054_A_1_F05 PG00054_A_2_F05 PG00054_A_3_F05 PG00054_A_4_F05 PGS00054_A_F05	L1L2_gt2	1	5
MGI:1916419	Fcmr	1	+	45241	FALSE	Conditional Ready	Promotorless	KOMP-CSD	PCS00055_A_G11	PG00055_A_3_H11 PG00055_A_1_H11 PG00055_A_8_H11 PG00055_A_3_G11 PG00055_A_6_G11 PG00055_A_6_H11 PGS00055_A_G11 PGS00055_B_G11 PG00055_A_8_G11 PG00055_A_4_H11	L1L2_st1	1	10
MGI:2385001	Fermt2	14	-	44603	FALSE	Conditional Ready	Promotorless	EUCOMM	PCS00050_A_H07	PG00050_A_2_H07 PG00050_A_4_H07 PG00050_A_5_H07 PG00050_A_7_H07 PGS00050_A_H07 PG00050_A_3_H07	L1L2_gt1	1	6
MGI:2675856	Fez2	17	-	41735	TRUE	Conditional Ready	Promotorless	KOMP-CSD	PCS00031_A_C01	PG00031_B_4_C01 PG00031_A_13_C01 PG00031_B_1_C01 PGS00031_A_C01	L1L2_gt0	1	4
MGI:1353657	Fgd3	13	-	40096	FALSE	Conditional Ready	Promotorless	EUCOMM	PCS00030_B_H08	PG00030_C_1_H08 PG00030_C_4_H08 PGS00030_C_H08 PG00030_C_3_H08	L1L2_gt2	1	4
MGI:2443369	Fgd5	6	+	42375	FALSE	Conditional Ready	Promotorless	KOMP-CSD	PCS00036_A_C05	PGS00036_A_C05 PG00036_A_3_C05 PG00036_A_4_C05 PG00036_A_2_C05 PG00036_A_1_C05	L1L2_gt1	1	5
MGI:109178	Fgf13	X	-	41233	FALSE	Conditional Ready	Promotorless	EUCOMM	PCS00030_B_D07	PG00030_B_3_D07 PG00030_B_4_D07 PG00030_C_2_D07 PG00030_C_3_D07 PG00030_C_4_D07 PGS00030_B_D07 PGS00030_C_D07	L1L2_gt1	1	7
MGI:109189	Fgf14	14	-	40450	FALSE	Conditional Ready	Promotorless	EUCOMM	PCS00030_B_C03	PG00030_B_2_C03 PG00030_B_4_C03 PG00030_C_3_C03 PG00030_C_4_C03 PGS00030_B_C03 PGS00030_C_C03 PG00030_C_2_C03	L1L2_gt1	1	7
MGI:1931627	Fgf16	X	+	41089	FALSE	Conditional Ready	Promotorless	KOMP-CSD	PCS00027_A_E05	PG00027_B_2_E05 PGS00027_A_E05 PG00027_B_4_E05 PG00027_B_1_E05 PG00027_B_3_E05	L1L2_gt1	1	5
MGI:1277980	Fgf18	11	-	244	FALSE	Conditional Ready	Promotorless	EUCOMM	PCS00004_A_F11	PG00004_A_1_F11 PG00004_A_2_F11 PG00004_A_4_F11 PGS00004_A_F11	L1L2_gt0	1	4
MGI:95516	Fgf2	3	+	413	FALSE	Conditional Ready	Promotorless	EUCOMM	PCS00005_A_H12 PCS00035_A_H12	PG00005_A_2_H12 PG00005_A_3_H12 PG00005_A_4_H12 PGS00005_A_H12 PG00035_A_2_H12 PG00005_A_1_H12 PGS00035_A_H12	L1L2_gt1	2	7
MGI:95524	Fgfr3	5	+	40496	FALSE	Conditional Ready	Promotorless	EUCOMM	PCS00030_B_F05	PG00030_B_2_F05 PG00030_B_3_F05 PG00030_B_4_F05 PG00030_C_1_F05 PG00030_C_2_F05 PG00030_C_3_F04 PGS00030_B_F05 PGS00030_C_F05 PG00030_C_1_F04 PG00030_C_2_F04	L1L2_st1 L1L2_gt1	1	10
MGI:95527	Fgr	4	+	39192	FALSE	Conditional Ready	Promotorless	EUCOMM	PCS00011_A_E07	PG00011_A_1_E08 PG00011_A_1_E09 PG00011_A_2_E07 PG00011_A_2_E09 PG00011_A_2_G08 PG00011_A_4_E07 PG00011_A_4_E08 PGS00011_A_E07 PG00011_A_3_E07	L1L2_gt1	1	9
MGI:2684972	Fhdc1	3	-	41810	FALSE	Conditional Ready	Promotorless	KOMP-CSD	PCS00031_A_H07	PG00031_B_1_H07	L1L2_gt2	1	1
MGI:1913192	Fhl5	4	-	35926	FALSE	Conditional Ready	Promotorless	KOMP-CSD	PCS00021_A_A03	PG00021_A_1_A03 PGS00021_A_A03 PG00021_C_4_A03 PGS00021_B_A03 PG00021_B_1_A03 PG00021_A_2_A03 PG00021_C_3_A03	L1L2_gt0 L1L2_st0	1	7
MGI:2387639	Fkbp14	6	-	45226	FALSE	Conditional Ready	Promotorless	KOMP-CSD	PCS00055_A_E09	PGS00055_B_E09 PGS00055_A_E09 PG00055_A_4_E09 PG00055_A_2_E09	L1L2_st0	1	4
MGI:95541	Fkbp1a	2	+	39484	FALSE	Conditional Ready	Promotorless	EUCOMM	PCS00044_A_D08	PGS00044_A_D08 PG00044_A_8_D08	L1L2_gt1	1	2
MGI:1336879	Fkbp7	2	-	34615	FALSE	Conditional Ready	Promotorless	KOMP-CSD	PCS00027_A_D09	GR00030_A09	L1L2_st2	1	1
MGI:1350921	Fkbp9	6	+	43282	FALSE	Conditional Ready	Promotorless	EUCOMM	PCS00054_B_H11	PG00054_A_2_H11 PG00054_A_3_H11 PGS00054_A_H11	L1L2_st2	1	3
MGI:2179507	Fktn	4	+	33848	FALSE	Conditional Ready	Promotorless	EUCOMM	PCS00042_A_H06	PG00042_A_1_G06 PG00042_A_3_G06 PG00042_A_4_G06 PGS00042_A_H06	L1L2_gt0 L1L2_st0	1	4
MGI:2442184	Flcn	11	-	43661	TRUE	Conditional Ready	Promotorless	EUCOMM	PCS00054_B_G05	PG00054_A_2_G05 PG00054_A_3_G05 PG00054_A_4_G05 PGS00054_A_G05	L1L2_gt2	1	4
MGI:95556	Flna	X	-	44099	FALSE	Conditional Ready	Promotorless	EUCOMM	PCS00046_A_C06	PG00046_A_1_C06 PG00046_A_2_C06 PG00046_A_3_C06 PG00046_A_4_C06 PGS00046_A_C06	L1L2_gt1	1	5
MGI:103309	Flot2	11	+	47151	TRUE	Conditional Ready	Promotorless	EUCOMM	PCS00063_A_E02	PG00063_B_4_E02 PGS00063_A_E02	L1L2_gt0	1	2
MGI:95558	Flt1	5	-	40278	FALSE	Conditional Ready	Promotorless	EUCOMM	PCS00030_B_D05	PG00030_C_1_E04 PG00030_C_2_D04 PG00030_C_2_D05 PG00030_C_2_E04 PG00030_C_3_D05 PG00030_C_3_E04 PG00030_C_4_D04 PG00030_C_4_D05 PG00030_C_4_E04 PGS00030_C_D05	L1L2_gt1 L1L2_st1	1	10
MGI:1916776	Fmo2	1	-	42607	FALSE	Conditional Ready	Promotorless	KOMP-CSD	PCS00049_A_H08	PGS00049_A_H08 PG00049_A_1_H08 PGS00049_B_H08	L1L2_gt0	1	3
MGI:1100496	Fmo3	1	-	42619	FALSE	Conditional Ready	Promotorless	KOMP-CSD	PCS00041_A_E06	PG00041_A_2_E06 PGS00041_A_E06	L1L2_gt1	1	2
MGI:1310004	Fmo5	3	+	42241	TRUE	Conditional Ready	Promotorless	KOMP-CSD	PCS00036_A_F10	PGS00036_A_F10 PG00036_A_2_F10 PG00036_A_4_F10 PG00036_A_3_F10	L1L2_gt0	1	4
MGI:1926834	Fn3k	11	+	41850	FALSE	Conditional Ready	Promotorless	KOMP-CSD	PCS00031_A_F08	PGS00031_A_F08 PG00031_A_1_F08	L1L2_gt0	1	2
MGI:2679256	Fn3krp	11	+	38778	FALSE	Conditional Ready	Promotorless	KOMP-CSD	PCS00020_A_B08	PG00020_A_4_B08 PGS00020_A_B08 PG00020_A_1_B08 PG00020_A_3_B08	L1L2_gt1	1	4
MGI:1926169	Fndc8	11	+	39	FALSE	Conditional Ready	Promotorless	EUCOMM	PCS00006_A_A11	PG00006_A_1_A11 PG00006_A_3_A11 PG00006_A_4_A11 PGS00006_A_A11	L1L2_gt2	1	4
MGI:1347487	Foxm1	6	+	42287	FALSE	Conditional Ready	Promotorless	EUCOMM	PCS00038_A_B04	PGS00038_A_B04 PG00038_A_4_A05	L1L2_gt1	1	2
MGI:102949	Foxn1	11	-	8	FALSE	Conditional Ready	Promotorless	EUCOMM	PCS00004_A_A04 PCS00034_A_A04	PG00004_A_2_A04 PG00004_A_3_A04 PG00004_A_4_A04 PGS00004_A_A04 PG00034_A_1_H09 PG00034_A_3_H09 PG00034_A_4_H09 PG00034_A_5_H09 PG00034_A_8_H09 PGS00034_A_A04 PG00004_A_1_A04	L1L2_gt0	2	11
MGI:95576	Fpgs	2	-	26672	FALSE	Conditional Ready	Promotorless	EUCOMM	PCS00008_A_G06	PG00008_A_1_G06 PG00008_A_2_G06 PG00008_A_3_G06 PG00008_A_4_G06 PGS00008_A_G06	L1L2_gt0	1	5
MGI:2670972	Frem1	4	-	27	FALSE	Conditional Ready	Promotorless	EUCOMM	PCS00004_A_B01 PCS00034_A_B01	PG00004_A_2_B01 PG00004_A_3_B01 PG00004_A_4_B01 PGS00004_A_B01 PG00034_A_6_G12 PG00034_A_7_G12 PGS00034_A_B01 PG00034_A_5_G12	L1L2_gt0 L1L2_st0	2	8
MGI:2141794	Frmd4b	6	-	43169	FALSE	Conditional Ready	Promotorless	EUCOMM	PCS00050_A_A02	PG00050_A_2_A02 PG00050_A_4_A02 PG00050_A_5_A02 PG00050_A_8_A02 PGS00050_A_A02 PG00050_A_6_A02	L1L2_gt0	1	6
MGI:3042378	Frmpd4	X	-	40943	FALSE	Conditional Ready	Promotorless	EUCOMM	PCS00033_A_F04	PG00033_A_1_F04 PG00033_A_2_F04 PG00033_A_4_F04 PGS00033_A_F04	L1L2_gt1	1	4
MGI:892032	Frzb	2	-	40235	FALSE	Conditional Ready	Promotorless	EUCOMM	PCS00030_B_F08	PG00030_B_2_F08 PG00030_B_3_F08 PG00030_C_4_F06 PGS00030_B_F08 PGS00030_C_F08	L1L2_st1 L1L2_gt1	1	5
MGI:2442443	Fsd1l	4	+	33847	FALSE	Conditional Ready	Promotorless	EUCOMM	PCS00011_A_E10 PCS00043_A_E10	PG00011_A_4_F09 PGS00011_A_E10 PG00043_A_2_E11 PG00043_A_4_E10 PGS00043_A_E10	L1L2_gt1	2	5
MGI:2442443	Fsd1l	4	+	47231	FALSE	Conditional Ready	Promotorless	EUCOMM	PCS00064_A_H06	PG00064_A_3_H06 PGS00064_A_H06	L1L2_gt1	1	2
MGI:1918563	Fsip1	2	-	28046	FALSE	Conditional Ready	Promotorless	EUCOMM	PCS00008_A_B02	PG00008_A_1_B02 PG00008_A_2_B02 PG00008_A_3_B02 PG00008_A_4_B02 PGS00008_A_B02	L1L2_gt0	1	5
MGI:2443199	Fstl4	11	+	2	FALSE	Conditional Ready	Promotorless	EUCOMM	PCS00004_A_A02	PG00004_A_1_B01 PG00004_A_2_A02 PG00004_A_3_A02 PG00004_A_4_A02 PGS00004_A_A02	L1L2_gt0	1	5
MGI:1339962	Ftcd	10	+	39979	FALSE	Conditional Ready	Promotorless	EUCOMM	PCS00019_A_D04	PGS00019_A_D04 PG00019_A_4_D04 PG00019_A_3_D04	L1L2_gt0	1	3
MGI:1347093	Fto	8	+	47286	FALSE	Conditional Ready	Promotorless	EUCOMM	PCS00063_A_B03	PG00063_B_1_B03 PGS00063_A_B03 PG00063_B_2_B03	L1L2_gt0	1	3
MGI:95593	Fuca1	4	+	538	FALSE	Conditional Ready	Promotorless	EUCOMM	PCS00006_A_H06	PG00006_A_2_H06 PG00006_A_4_H06 PGS00006_A_H06 PG00006_A_3_H06	L1L2_gt2	1	4
MGI:1914098	Fuca2	10	+	44806	FALSE	Conditional Ready	Promotorless	KOMP-CSD	PCS00052_A_A11	PG00052_A_6_A11 PGS00052_A_A11 PG00052_A_5_A11 PG00052_A_7_A11 PG00052_A_8_A11	L1L2_st2	1	5
MGI:1919268	Fundc1	X	-	41066	FALSE	Conditional Ready	Promotorless	KOMP-CSD	PCS00027_A_A07	PG00027_B_4_A07 PGS00027_A_A07 PG00027_B_2_A07 PG00027_B_3_A07	L1L2_gt2	1	4
MGI:1914641	Fundc2	X	+	40914	FALSE	Conditional Ready	Promotorless	EUCOMM	PCS00033_A_D04	PG00033_A_1_D04 PG00033_A_2_D04 PG00033_A_3_D04 PG00033_A_4_D04 PGS00033_A_D04	L1L2_gt1	1	5
MGI:1353633	Fus	7	+	236153	FALSE	Conditional Ready	Promotorless	KOMP-CSD	PCP10002_A_F10	PFA0002_A_1_F10 PFA0002_A_2_F10 PFA0002_A_4_F10 PFA0002_A_3_F10 PFA0002_A_5_F10	L1L2_gt1	1	5
MGI:1915651	G6pc3	11	+	46538	FALSE	Conditional Ready	Promotorless	EUCOMM	PCS00062_A_D07	PG00062_A_1_D07 PG00062_A_2_D07 PG00062_A_3_D07 PG00062_A_4_D07 PGS00062_A_D07	L1L2_gt2	1	5
MGI:1861742	Gabarap	11	+	47535	FALSE	Conditional Ready	Promotorless	EUCOMM	PCP10002_A_A07	PFA0002_A_3_A07 PFA0002_A_7_A07 PFA0002_A_6_A07	L1L2_gt0	1	3
MGI:95620	Gabrb2	11	+	352	FALSE	Conditional Ready	Promotorless	EUCOMM	PCS00005_A_G07	PG00005_A_1_G07 PG00005_A_2_G07 PG00005_A_3_G07 PG00005_A_4_G07 PGS00005_A_G07	L1L2_gt1	1	5
MGI:95623	Gabrg2	11	-	355	FALSE	Conditional Ready	Promotorless	EUCOMM	PCS00006_A_F04 PCS00016_A_F04	PG00006_A_1_E07 PG00006_A_2_E07 PG00006_A_3_E07 PG00006_A_4_E07 PGS00006_A_E07 PGS00016_A_F04	L1L2_gt2 L1L2_st2	2	6
MGI:95626	Gabrr2	4	+	35935	FALSE	Conditional Ready	Promotorless	KOMP-CSD	PCS00045_A_D08	PG00045_A_8_D08 PG00045_B_1_D08 PG00045_B_2_D08 PG00045_B_3_D08 PG00045_D_2_D08 PG00045_D_4_D08 PGS00045_D_D08 PG00045_A_6_D08 PGS00045_A_D08	L1L2_st0	1	9
MGI:95730	Galk1	11	-	43599	FALSE	Conditional Ready	Promotorless	EUCOMM	PCS00047_A_A08	PG00047_A_1_A08 PG00047_A_2_A08 PG00047_A_3_A08 PG00047_A_4_A08 PGS00047_A_A08	L1L2_gt0	1	5
MGI:1890480	Galnt10	11	+	282	FALSE	Conditional Ready	Promotorless	EUCOMM	PCS00004_A_H03	PG00004_A_1_H03 PG00004_A_2_H03 PG00004_A_4_H03 PGS00004_A_H03 PG00004_A_3_H03	L1L2_gt0	1	5
MGI:894695	Galnt3	2	-	34464	TRUE	Conditional Ready	Promotorless	KOMP-CSD	PCS00027_A_B10	PG00027_B_1_B10 PG00027_B_4_B10 PG00027_B_2_B10 PG00027_B_3_B10 PGS00027_A_B10	L1L2_st2	1	5
MGI:1098221	Gamt	10	-	46706	FALSE	Conditional Ready	Promotorless	EUCOMM	PCS00062_A_E09	PG00062_A_1_E09 PG00062_A_2_E09 PGS00062_A_E09	L1L2_gt1	1	3
MGI:1930948	Gar1	3	-	46895	FALSE	Conditional Ready	Promotorless	EUCOMM	PCS00064_A_A08	PG00064_A_2_A08 PG00064_A_3_A08 PG00064_A_4_A08 PGS00064_A_A08 PG00064_A_1_A08	L1L2_gt1	1	5
MGI:3652048	Gas2l2	11	-	43412	FALSE	Conditional Ready	Promotorless	KOMP-CSD	PCS00045_A_F05	PGS00045_D_F05 PG00045_A_1_F04 PG00045_A_8_F05 PG00045_A_3_F05 PG00045_B_3_F05 PG00045_D_2_F04 PG00045_B_1_F05 PG00045_D_1_F05 PG00045_D_2_F05 PGS00045_A_F05 PG00045_A_2_F05 PG00045_A_5_F05 PG00045_A_5_F04 PG00045_A_6_F04 PG00045_B_4_F05 PG00045_A_7_F05 PG00045_D_1_F04 PG00045_A_1_F05 PG00045_A_6_F05 PG00045_D_3_F05 PG00045_D_4_F05	L1L2_gt1	1	21
MGI:1202388	Gas7	11	+	33807	FALSE	Conditional Ready	Promotorless	EUCOMM	PCS00043_A_F07	PG00043_A_1_F07 PG00043_A_4_F07 PGS00043_A_F07	L1L2_gt1	1	3
MGI:95662	Gata2	6	+	209271	FALSE	Conditional Ready	Promotorless	KOMP-CSD	PCS00136_A_A06	PLBS60002_B_D12	pL1L2_GT1_DelLacZ_bsd	1	1
MGI:2442496	Gatb	3	+	42297	FALSE	Conditional Ready	Promotorless	KOMP-CSD	PCS00036_A_A02	PG00036_A_3_A02 PG00036_A_2_A02 PGS00036_A_A02 PG00036_A_4_A02	L1L2_gt0	1	4
MGI:1923776	Gatc	5	-	37266	FALSE	Conditional Ready	Promotorless	KOMP-CSD	PCS00027_A_B11	PG00027_B_3_B11 PG00027_B_1_B11 PGS00027_A_B11	L1L2_gt2	1	3
MGI:1933384	Gatsl2	5	+	42917	FALSE	Conditional Ready	Promotorless	EUCOMM	PCS00054_B_H01	PG00054_A_1_H01 PG00054_A_2_H01 PG00054_A_3_H01 PG00054_A_4_H01 PGS00054_A_H01	L1L2_gt2	1	5
MGI:1926263	Gbp3	3	+	41894	FALSE	Conditional Ready	Promotorless	KOMP-CSD	PCS00031_A_D09	PGS00031_A_D09 PG00031_A_13_D09	L1L2_gt1	1	2
MGI:95668	Gbx2	1	-	94073	FALSE	Conditional Ready	Promotorless	KOMP-CSD	PCS00105_A_D03	MOHFA50001_D_3_F04 MOHFA50001_D_2_F04 MOHFA50001_D_7_F04 MOHFA50001_D_4_F04	L1L2_gt1	1	4
MGI:2443977	Gchfr	2	+	39473	FALSE	Conditional Ready	Promotorless	EUCOMM	PCS00043_A_B03	PG00043_A_4_B03 PGS00043_A_B03	L1L2_gt0	1	2
MGI:104990	Gclc	9	+	40309	TRUE	Conditional Ready	Promotorless	EUCOMM	PCS00029_A_B03	PG00029_A_1_B03 PG00029_A_2_B03 PG00029_A_3_B03 PG00029_A_4_B03 PGS00029_A_B03	L1L2_gt0	1	5
MGI:1338002	Gdap1	1	+	41542	TRUE	Conditional Ready	Promotorless	KOMP-CSD	PCS00028_A_G06	PG00028_B_1_G06 PG00028_B_3_G06 PGS00028_A_G06 PG00028_B_4_G06	L1L2_gt0	1	4
MGI:2385163	Gdap1l1	2	+	29390	FALSE	Conditional Ready	Promotorless	EUCOMM	PCS00008_A_E03	PG00008_A_2_E03 PG00008_A_3_E03 PG00008_A_4_E03 PGS00008_A_E03	L1L2_gt0	1	4
MGI:1338001	Gdap2	3	+	389	FALSE	Conditional Ready	Promotorless	EUCOMM	PCS00016_A_F09 PCS00006_A_F09	PG00016_B_4_F09 PGS00016_A_F09 PGS00006_A_E11	L1L2_gt2	2	3
MGI:1891827	Gde1	7	-	47313	FALSE	Conditional Ready	Promotorless	EUCOMM	PCS00063_A_D03	PG00063_B_4_D03 PGS00063_A_D03	L1L2_gt0	1	2
MGI:95692	Gdf9	11	+	41591	FALSE	Conditional Ready	Promotorless	EUCOMM	PCS00033_A_B07	PG00033_A_2_B07 PG00033_A_3_B07 PGS00033_A_B07	L1L2_st1	1	3
MGI:99844	Gem	4	+	43857	FALSE	Conditional Ready	Promotorless	KOMP-CSD	PCS00045_A_C05	PG00045_A_6_C05 PG00045_A_7_C05 PG00045_A_8_C05 PG00045_B_2_C05 PG00045_B_3_C05 PG00045_B_4_C05 PG00045_D_2_C05 PG00045_D_3_C05 PG00045_D_4_C05 PGS00045_A_C05 PGS00045_D_C05	L1L2_gt1	1	11
MGI:1276578	Gfi1b	2	-	26477	FALSE	Conditional Ready	Promotorless	EUCOMM	PCS00008_A_G08	PG00008_A_1_G08 PG00008_A_2_G08 PG00008_A_3_G08 PG00008_A_4_G08 PGS00008_A_G08	L1L2_gt1	1	5
MGI:107339	Gfm1	3	+	47084	TRUE	Conditional Ready	Promotorless	EUCOMM	PCS00064_A_C06	PG00064_A_1_C06 PG00064_A_2_C06 PG00064_A_3_C06 PG00064_A_4_C06 PGS00064_A_C06	L1L2_gt1	1	5
MGI:95698	Gfpt1	6	+	43258	TRUE	Conditional Ready	Promotorless	EUCOMM	PCS00047_A_F03	PG00047_A_4_F03 PGS00047_A_F03 PG00047_A_2_F03	L1L2_gt0	1	3
MGI:95700	Ggct	6	-	43722	FALSE	Conditional Ready	Promotorless	EUCOMM	PCS00050_A_C03	PG00050_A_6_C03 PGS00050_A_C03	L1L2_gt0	1	2
MGI:1329035	Ggh	4	+	44251	FALSE	Conditional Ready	Promotorless	KOMP-CSD	PCS00048_A_E10	PGS00048_A_E10 PG00048_A_3_E10	L1L2_st1	1	2
MGI:1913385	Ggt7	2	-	35432	FALSE	Conditional Ready	Promotorless	KOMP-CSD	PCS00027_A_D11	PG00027_B_1_D11 PG00027_B_3_D11 PG00027_B_2_D11 PGS00027_A_D11 PG00027_B_4_D11	L1L2_gt2	1	5
MGI:1202394	Gif	19	+	44798	FALSE	Conditional Ready	Promotorless	KOMP-CSD	PCP10002_A_B12	PFA0002_A_1_B12 PFA0002_A_8_B12	L1L2_gt1	1	2
MGI:109368	Gimap1	6	+	45185	FALSE	Conditional Ready	Promotorless	KOMP-CSD	PCS00055_A_B08	PG00055_A_1_B08 PGS00055_B_B08 PG00055_A_2_B08 PGS00055_A_B08 PG00055_A_4_B08	L1L2_gt1	1	5
MGI:1918876	Gimap6	6	-	45182	TRUE	Conditional Ready	Promotorless	KOMP-CSD	PCS00055_A_B02	PG00055_A_3_B02 PG00055_A_5_B02 PG00055_A_6_B02 PG00055_A_2_B02 PG00055_A_7_B02 PGS00055_A_B02 PGS00055_B_B02 PG00055_A_4_B02	L1L2_gt0	1	8
MGI:95729	Gli3	13	+	42818	FALSE	Conditional Ready	Promotorless	EUCOMM	PCS00046_A_F07	PG00046_A_1_F07 PG00046_A_4_F07 PGS00046_A_F07	L1L2_gt2	1	3
MGI:1922032	Glt8d2	10	-	42713	FALSE	Conditional Ready	Promotorless	KOMP-CSD	PCS00041_A_F09	PG00041_A_3_F09 PGS00041_A_F09	L1L2_st1	1	2
MGI:1929253	Gltp	5	-	39376	FALSE	Conditional Ready	Promotorless	EUCOMM	PCS00044_A_B03	PG00044_A_5_B03 PG00044_A_6_B03 PG00044_A_7_B03 PG00044_A_8_B03 PGS00044_A_B03	L1L2_gt1	1	5
MGI:2685987	Gm1141	X	+	41172	FALSE	Conditional Ready	Promotorless	KOMP-CSD	PCS00027_A_G04	PGS00027_A_G04 PG00027_B_3_G04 PG00027_B_1_G04 PG00027_B_2_G04 PG00027_B_3_F04 PG00027_B_4_F04 PG00027_B_2_F04	L1L2_gt1	1	7
MGI:3651790	Gm11639	11	+	33707	TRUE	Conditional Ready	Promotorless	EUCOMM	PCS00040_A_F02	PG00040_A_4_F02 PGS00040_A_F02	L1L2_gt0	1	2
MGI:3651534	Gm12258	11	+	284	FALSE	Conditional Ready	Promotorless	EUCOMM	PCS00004_A_H04 PCS00034_A_H04	PG00004_A_1_H04 PG00004_A_2_H01 PG00004_A_2_H04 PG00004_A_3_H01 PG00004_A_3_H04 PG00004_A_4_H01 PG00004_A_4_H04 PGS00004_A_H04 PG00034_A_8_A09 PGS00034_A_H04	L1L2_gt0	2	10
MGI:3699710	Gm12353	4	+	356	FALSE	Conditional Ready	Promotorless	EUCOMM	PCS00006_A_F05 PCS00016_A_F05	PGS00006_A_E08 PG00006_A_3_E08 PG00006_A_4_E08 PGS00016_A_F05	L1L2_gt2	2	4
MGI:3649972	Gm13089	4	-	43323	FALSE	Conditional Ready	Promotorless	KOMP-CSD	PCS00049_A_E06	PG00049_A_1_E06 PG00049_A_5_E07 PGS00049_B_E06 PG00049_A_4_E07 PGS00049_A_E06 PG00049_A_6_E07	L1L2_gt2	1	6
MGI:3652194	Gm13124	4	-	43375	TRUE	Conditional Ready	Promotorless	KOMP-CSD	PCS00045_A_E10	PGS00045_A_E10 PGS00045_D_E10 PG00045_B_2_E10	L1L2_gt0	1	3
MGI:2684982	Gm136	4	-	365	FALSE	Conditional Ready	Promotorless	EUCOMM	PCS00005_A_G10 PCS00035_A_G10	PG00005_A_1_G10 PG00005_A_2_G10 PG00005_A_3_G10 PG00005_A_4_G10 PGS00005_A_G10 PG00035_A_1_G10 PG00035_A_2_G10 PG00035_A_3_G10 PG00035_A_4_G10 PGS00035_A_G10	L1L2_gt1	2	10
MGI:3650696	Gm14221	2	-	35521	FALSE	Conditional Ready	Promotorless	KOMP-CSD	PCS00021_A_E08	PGS00021_A_E08 PG00021_C_1_E08 PG00021_B_3_E08 PGS00021_B_E08	L1L2_gt0 L1L2_st0	1	4
MGI:3650696	Gm14221	2	-	41607	FALSE	Conditional Ready	Promotorless	KOMP-CSD	PCS00031_A_E02	PGS00031_A_E02 PG00031_B_1_E02 PG00031_B_3_E02	L1L2_gt0	1	3
MGI:3650075	Gm14401	2	+	44089	FALSE	Conditional Ready	Promotorless	KOMP-CSD	PCS00048_A_D03	PGS00048_A_D03 PG00048_A_1_D03 PG00048_A_4_D03 PG00048_A_2_D03	L1L2_gt0	1	4
MGI:3651589	Gm14461	2	+	43016	FALSE	Conditional Ready	Promotorless	KOMP-CSD	PCS00041_A_A09	PG00041_A_4_A09 PGS00041_A_A09 PG00041_A_1_A09 PG00041_A_2_A09	L1L2_st0	1	4
MGI:2686507	Gm1661	4	-	39176	FALSE	Conditional Ready	Promotorless	EUCOMM	PCS00044_A_B10	PG00044_A_8_B10 PGS00044_A_B10	L1L2_gt2	1	2
MGI:2685371	Gm525	11	+	33677	FALSE	Conditional Ready	Promotorless	EUCOMM	PCS00040_A_H08	PG00040_A_3_H08 PGS00040_A_H08	L1L2_st1	1	2
MGI:2685418	Gm572	4	+	47245	TRUE	Conditional Ready	Promotorless	EUCOMM	PCS00064_A_G12	PG00064_A_1_G12 PGS00064_A_G12	L1L2_gt1	1	2
MGI:2685619	Gm773	X	-	41867	FALSE	Conditional Ready	Promotorless	KOMP-CSD	PCS00031_A_D08	PG00031_A_15_D08 PG00031_B_4_D08 PG00031_A_1_D08 PG00031_A_14_D08 PG00031_A_3_D08 PGS00031_A_D08 PG00031_B_3_D08 PG00031_A_4_D08 PG00031_A_2_D08	L1L2_gt2	1	9
MGI:2685699	Gm853	4	-	514	FALSE	Conditional Ready	Promotorless	EUCOMM	PCS00017_A_F07	PG00017_B_3_F07 PGS00017_A_F07	L1L2_gt0	1	2
MGI:1345156	Gmcl1	6	-	42997	FALSE	Conditional Ready	Promotorless	EUCOMM	PCS00054_B_B02	PG00054_A_4_B02 PGS00054_A_B02	L1L2_gt2	1	2
MGI:1891112	Gmds	13	-	38930	FALSE	Conditional Ready	Promotorless	KOMP-CSD	PCS00023_E_E01	PG00023_D_1_E01 PG00023_D_2_E01 PGS00023_A_E01 PG00023_C_1_E01 PG00023_E_4_E01 PG00023_D_3_E01 PGS00023_E_E01	L1L2_gt0	1	7
MGI:2135604	Gmeb1	4	-	44408	FALSE	Conditional Ready	Promotorless	EUCOMM	PCS00051_A_D08	PLB60002_B_1_E05 PLB60002_B_4_E05 PLB60002_B_1_D06 PLBS60002_B_C05 PLB60002_B_2_E05 PG00051_A_4_D08 PGS00051_A_D08	pL1L2_GT1_DelLacZ_bsd L1L2_gt1	1	7
MGI:1927133	Gmfb	14	-	42424	TRUE	Conditional Ready	Promotorless	EUCOMM	PCS00038_A_B02	PG00038_A_3_B03 PG00038_A_4_B03 PGS00038_A_B02 PG00038_A_1_B03	L1L2_gt0	1	4
MGI:1927344	Gmnn	13	-	38849	FALSE	Conditional Ready	Promotorless	KOMP-CSD	PCS00023_E_D01	PG00023_E_2_D01 PG00023_E_4_D01 PGS00023_E_D01	L1L2_gt0	1	3
MGI:1913605	Gmpr	13	+	42454	FALSE	Conditional Ready	Promotorless	KOMP-CSD	PCS00036_A_B01	PG00036_A_2_B01 PG00036_A_3_B01 PGS00036_A_B01 PG00036_A_1_B01	L1L2_gt0	1	4
MGI:95773	Gnai3	3	-	35792	FALSE	Conditional Ready	Promotorless	KOMP-CSD	PCS00023_E_B03	PG00023_C_1_B04 PG00023_D_1_B03 PG00023_D_2_B03 PG00023_D_2_B04 PG00023_D_3_B03 PG00023_D_4_B03 PG00023_D_4_B04 PGS00023_A_B03 PG00023_C_2_B04	L1L2_gt0	1	9
MGI:95779	Gnat2	3	+	44120	FALSE	Conditional Ready	Promotorless	EUCOMM	PCS00046_A_C07	PG00046_A_2_C07 PGS00046_A_C07	L1L2_gt1	1	2
MGI:104581	Gnb4	3	-	39537	TRUE	Conditional Ready	Promotorless	EUCOMM	PCS00011_A_E04	PG00011_A_2_C03 PGS00011_A_E04	L1L2_gt0	1	2
MGI:1354951	Gne	4	-	33851	TRUE	Conditional Ready	Promotorless	EUCOMM	PCS00044_A_D11	PG00044_A_5_D11 PG00044_A_6_D11 PG00044_A_7_D11 PG00044_A_8_D11 PGS00044_A_D11	L1L2_gt2	1	5
MGI:1336171	Gng12	6	+	43086	FALSE	Conditional Ready	Promotorless	EUCOMM	PCS00047_A_D02	PG00047_A_1_D02 PGS00047_A_D02	L1L2_gt0	1	2
MGI:2385207	Gnl2	4	+	492	FALSE	Conditional Ready	Promotorless	EUCOMM	PCS00007_A_E12 PCS00017_A_E12	PG00007_B_2_E12 PG00007_B_3_E12 PGS00007_A_E12 PG00017_B_2_E12 PGS00017_A_E12	L1L2_gt1	2	5
MGI:1924149	Golga1	2	-	26888	FALSE	Conditional Ready	Promotorless	EUCOMM	PCS00008_A_C05	PG00008_A_3_C05 PG00008_A_1_C05	L1L2_gt0	1	2
MGI:1099447	Golgb1	16	+	43528	TRUE	Conditional Ready	Promotorless	EUCOMM	PCS00047_A_B10	PG00047_A_2_B10 PGS00047_A_B10	L1L2_gt0	1	2
MGI:2135962	Gorasp2	2	+	27337	FALSE	Conditional Ready	Promotorless	EUCOMM	PCS00008_A_C03	PG00008_A_3_C03 PGS00008_A_C03	L1L2_gt0	1	2
MGI:2684962	Gpat2	2	+	43011	FALSE	Conditional Ready	Promotorless	KOMP-CSD	PCS00041_A_E02	PG00041_A_2_E02 PG00041_A_1_E02 PG00041_A_4_E02 PG00041_A_3_E02 PGS00041_A_E02	L1L2_gt0	1	5
MGI:2442492	Gpatch3	4	+	44407	FALSE	Conditional Ready	Promotorless	EUCOMM	PCS00050_A_H04	PG00050_A_1_H04 PG00050_A_1_H05 PG00050_A_1_H06 PG00050_A_2_H03 PG00050_A_2_H04 PG00050_A_2_H05 PG00050_A_3_H03 PG00050_A_4_H04 PG00050_A_4_H05 PG00050_A_7_H04 PG00050_A_8_H03 PG00050_A_8_H04 PGS00050_A_H04 PG00050_A_3_H04	L1L2_gt0	1	14
MGI:1859610	Gpkow	X	+	40666	FALSE	Conditional Ready	Promotorless	EUCOMM	PCS00038_A_B06	PG00038_A_1_B07 PG00038_A_2_B07 PGS00038_A_B06	L1L2_gt2	1	3
MGI:1921504	Gpn1	5	+	46199	FALSE	Conditional Ready	Promotorless	EUCOMM	PCS00060_A_E07	PG00060_A_1_E07 PG00060_A_2_E07 PG00060_A_3_E07 PGS00060_A_E07 PG00060_A_4_E07	L1L2_gt1	1	5
MGI:2442046	Gpr157	4	+	44197	FALSE	Conditional Ready	Promotorless	KOMP-CSD	PCS00048_A_G12	PG00048_A_4_G12 PGS00048_A_G12 PG00048_A_1_G12 PG00048_A_3_G12	L1L2_st2	1	4
MGI:2441697	Gpr158	2	+	39269	FALSE	Conditional Ready	Promotorless	KOMP-CSD	PCS00026_B_B11	PG00026_B_2_B10 PGS00026_A_B11 PGS00026_B_B11 PG00026_A_4_B11	L1L2_gt2 L1L2_st2	1	4
MGI:1935037	Gprc5d	6	-	43150	FALSE	Conditional Ready	Promotorless	EUCOMM	PCS00047_A_G10	PG00047_A_2_G10 PGS00047_A_G10	L1L2_gt0	1	2
MGI:1923373	Gpsm2	3	-	403	FALSE	Conditional Ready	Promotorless	EUCOMM	PCS00007_A_B04 PCS00017_A_B04	PG00007_B_1_B04 PG00007_B_2_B03 PG00007_B_2_B04 PG00007_B_3_B03 PG00007_B_3_B04 PG00007_B_4_B04 PGS00007_A_B04 PG00017_B_3_B04 PGS00017_A_B04 PG00017_B_1_B04 PG00007_B_1_B03	L1L2_gt0	2	11
MGI:1915391	Gpt2	8	+	41929	FALSE	Conditional Ready	Promotorless	KOMP-CSD	PCS00031_A_C04	PG00031_A_2_C04 PG00031_A_3_C04 PG00031_B_1_C04 PG00031_A_1_C04 PG00031_B_3_C04 PG00031_A_1_C03 PG00031_B_3_C03 PG00031_B_4_C04 PGS00031_A_C04 PG00031_A_4_C04 PG00031_B_3_A03 PG00031_B_2_C04	L1L2_gt0	1	12
MGI:105102	Gpx3	11	+	41205	FALSE	Conditional Ready	Promotorless	KOMP-CSD	PCS00027_A_A02	PG00027_B_2_A02 PGS00027_A_A02 PG00027_B_1_A02	L1L2_st0	1	3
MGI:104886	Gpx5	13	-	38811	FALSE	Conditional Ready	Promotorless	KOMP-CSD	PCS00021_A_A02	PG00021_B_3_A02 PG00021_A_2_A02 PGS00021_A_A02 PGS00021_B_A02 PG00021_C_4_A02 PG00021_C_2_A02 PG00021_C_3_A02 PG00021_B_4_A02	L1L2_st0 L1L2_gt0	1	8
MGI:1922762	Gpx6	13	+	40196	FALSE	Conditional Ready	Promotorless	EUCOMM	PCS00029_A_E03	PG00029_A_1_E03 PG00029_A_2_E03 PG00029_A_4_E03 PGS00029_A_E03 PG00029_A_3_E03	L1L2_st0	1	5
MGI:1914555	Gpx7	4	-	40029	FALSE	Conditional Ready	Promotorless	EUCOMM	PCS00029_A_G03	PG00029_A_1_G03 PG00029_A_3_G03 PG00029_A_4_G03 PGS00029_A_G03 PG00029_A_2_G03	L1L2_st0	1	5
MGI:2443024	Gramd1c	16	-	42973	FALSE	Conditional Ready	Promotorless	KOMP-CSD	PCS00041_A_C07	PGS00041_A_C07 PG00041_A_3_C07 PG00041_A_4_C07 PG00041_A_1_C07 PG00041_A_2_C07	L1L2_gt1	1	5
MGI:95805	Grb2	11	-	140	FALSE	Conditional Ready	Promotorless	EUCOMM	PCS00004_A_D09 PCS00034_A_D09	PG00004_A_1_D09 PG00004_A_3_C09 PG00004_A_3_D09 PG00004_A_4_C09 PG00004_A_4_D09 PG00034_A_1_E04 PGS00034_A_D09 PG00004_A_2_D09 PGS00004_A_D09	L1L2_gt0	2	9
MGI:2655333	Grhl3	4	-	525	FALSE	Conditional Ready	Promotorless	EUCOMM	PCS00016_A_H02 PCS00006_A_H02	PG00016_B_2_H02 PG00016_B_3_H02 PGS00016_A_H02 PG00006_A_3_H02 PGS00006_A_H02 PG00006_A_4_H02 PGS00006_A_F11	L1L2_gt2	2	7
MGI:2176213	Grid2ip	5	+	45106	FALSE	Conditional Ready	Promotorless	KOMP-CSD	PCS00055_A_B05	PG00055_A_7_B05 PGS00055_A_B05 PGS00055_B_B05 PG00055_A_2_B05 PG00055_A_3_B05 PG00055_A_4_B05	L1L2_gt2	1	6
MGI:95816	Grik3	4	+	491	FALSE	Conditional Ready	Promotorless	EUCOMM	PCS00007_A_D12 PCS00017_A_D12	PG00007_B_1_D12 PG00007_B_3_D12 PGS00007_A_D12 PG00017_B_2_D12 PG00017_B_3_D12 PGS00017_A_D12 PG00017_B_1_D12	L1L2_gt1	2	7
MGI:95820	Grin2a	16	-	39012	FALSE	Conditional Ready	Promotorless	KOMP-CSD	PCS00021_A_H08	PG00021_B_4_H08 PGS00021_B_H08 PGS00021_A_H08	L1L2_st0 L1L2_gt0	1	3
MGI:95821	Grin2b	6	-	37380	FALSE	Conditional Ready	Promotorless	KOMP-CSD	PCS00021_A_C09	PG00021_A_2_C09 PG00021_B_3_C09 PGS00021_A_C09 PGS00021_B_C09	L1L2_gt0 L1L2_st0	1	4
MGI:1933206	Grin3a	4	-	388	FALSE	Conditional Ready	Promotorless	EUCOMM	PCS00007_A_D03 PCS00017_A_D03	PG00007_B_2_D03 PG00007_B_3_D03 PG00007_B_4_D03 PGS00007_A_D03 PG00017_B_4_D03 PGS00017_A_D03 PG00017_B_2_D03	L1L2_gt0 L1L2_st0	2	7
MGI:1351343	Grm6	11	+	434	TRUE	Conditional Ready	Promotorless	EUCOMM	PCS00007_A_D05	PG00007_B_4_D05 PGS00007_A_D05 PG00007_B_2_D05	L1L2_gt0	1	3
MGI:1334417	Grpel1	5	+	45976	FALSE	Conditional Ready	Promotorless	EUCOMM	PCP10002_A_E08	PFA0002_A_6_E08	L1L2_gt2	1	1
MGI:1919940	Grrp1	4	-	46488	TRUE	Conditional Ready	Promotorless	EUCOMM	PCS00062_A_A06	PG00062_A_1_A06 PG00062_A_4_A06 PGS00062_A_A06	L1L2_gt0	1	3
MGI:2152453	Gsk3a	7	-	40413	TRUE	Conditional Ready	Promotorless	EUCOMM	PCS00029_A_D10	PGS00029_A_D10 PG00029_A_4_D10	L1L2_gt1	1	2
MGI:1861437	Gsk3b	16	+	40285	TRUE	Conditional Ready	Promotorless	EUCOMM	PCS00029_A_C07	PG00029_A_1_C07 PG00029_A_2_C07 PG00029_A_3_C07 PG00029_A_3_C08 PG00029_A_4_C07 PG00029_A_4_D06 PGS00029_A_C07 MPGS8003_A_B09	L1L2_gt0	1	8
MGI:95851	Gsn	2	+	43638	FALSE	Conditional Ready	Promotorless	EUCOMM	PCS00046_A_E11	PG00046_A_1_E11 PG00046_A_2_E11 PG00046_A_3_E11 PGS00046_A_E11	L1L2_st1	1	4
MGI:95804	Gsr	8	+	33624	FALSE	Conditional Ready	Promotorless	EUCOMM	PCS00008_A_A05	PG00008_A_1_A05 PGS00008_A_A05	L1L2_gt0	1	2
MGI:1921447	Gtf2e1	16	-	43915	FALSE	Conditional Ready	Promotorless	EUCOMM	PCS00051_A_D07	PG00051_A_3_D07 PGS00051_A_D07	L1L2_gt1	1	2
MGI:1338799	Gtf2h4	17	-	234309	FALSE	Conditional Ready	Promotorless	KOMP-CSD	PCS00174_A_G11	MOHFA50001_D_1_H11 PLNS50001_D_E10 MOHFA50001_D_6_H11	L1L2_gt2	1	3
MGI:1917489	Gtf3c5	2	-	34189	FALSE	Conditional Ready	Promotorless	KOMP-CSD	PCS00045_A_E03	PG00045_B_2_E03 PG00045_B_3_E03 PGS00045_D_E03 PGS00045_A_E03 PG00045_A_2_E03 PG00045_B_1_E03	L1L2_gt1	1	6
MGI:102738	Guca2a	4	+	46417	FALSE	Conditional Ready	Promotorless	EUCOMM	PCS00060_A_E11	PG00060_A_1_E11 PG00060_A_2_E11 PG00060_A_3_E11 PGS00060_A_E11	L1L2_st0	1	4
MGI:2660873	Gucy1b2	14	-	42986	FALSE	Conditional Ready	Promotorless	KOMP-CSD	PCS00041_A_A03	PG00041_A_4_A03 PGS00041_A_A03	L1L2_gt1	1	2
MGI:105119	Gucy2f	X	-	41124	TRUE	Conditional Ready	Promotorless	KOMP-CSD	PCS00027_A_H04	GR00031_H08	L1L2_gt1	1	1
MGI:2682940	Gxylt2	6	+	42504	FALSE	Conditional Ready	Promotorless	KOMP-CSD	PCS00036_A_F08	PG00036_A_3_F08 PGS00036_A_F08 PG00036_A_4_F08 PG00036_A_1_F08	L1L2_st2	1	4
MGI:101805	Gys1	7	+	42366	FALSE	Conditional Ready	Promotorless	EUCOMM	PCS00038_A_F04	PG00038_A_1_F04 PG00038_A_2_F04 PG00038_A_3_F04 PG00038_A_4_F04 PGS00038_A_F04	L1L2_gt1	1	5
MGI:1349392	H2afy	13	-	40089	FALSE	Conditional Ready	Promotorless	EUCOMM	PCS00029_A_C02	PG00029_A_2_C02 PG00029_A_3_C02 PG00029_A_4_C02 PGS00029_A_C02 PG00029_A_1_C02	L1L2_gt1	1	5
MGI:2140356	H6pd	4	-	44641	FALSE	Conditional Ready	Promotorless	EUCOMM	PCS00050_A_D11	PG00050_A_4_D11 PG00050_A_8_D11 PGS00050_A_D11 PG00050_A_2_D11	L1L2_st0	1	4
MGI:1914025	Hacd4	4	-	425	FALSE	Conditional Ready	Promotorless	EUCOMM	PCS00006_A_F12 PCS00016_A_F12	PG00006_A_3_F01 PG00006_A_4_F01 PGS00006_A_F01 PG00016_B_1_F11 PG00016_B_4_F12 PGS00016_A_F12	L1L2_gt2	2	6
MGI:1929657	Hacl1	14	-	43010	FALSE	Conditional Ready	Promotorless	KOMP-CSD	PCS00041_A_G01	PGS00041_A_G01 PG00041_A_3_G01 PG00041_A_4_G01	L1L2_gt0	1	3
MGI:2135593	Hadha	5	-	43048	TRUE	Conditional Ready	Promotorless	EUCOMM	PCS00054_B_C02	PG00054_A_2_C02 PGS00054_A_C02 PG00054_A_1_C02	L1L2_gt2	1	3
MGI:95745	Hagh	17	+	44797	FALSE	Conditional Ready	Promotorless	KOMP-CSD	PCS00052_A_B06	PG00052_A_5_B06 PG00052_A_7_B06 PGS00052_A_B06 PG00052_A_4_B06	L1L2_gt2	1	4
MGI:96012	Hao2	3	-	35784	FALSE	Conditional Ready	Promotorless	KOMP-CSD	PCS00027_A_B08	PGS00027_A_B08 PG00027_B_4_B08 PG00027_B_1_B08 PG00027_B_3_B08 PG00027_B_2_B08	L1L2_gt2	1	5
MGI:96052	Hck	2	+	29037	FALSE	Conditional Ready	Promotorless	EUCOMM	PCS00008_A_D01	PG00008_A_1_D01 PG00008_A_2_D01 PG00008_A_4_D01 PGS00008_A_D01 PG00008_A_3_D01	L1L2_gt0	1	5
MGI:108086	Hdac1	4	-	39802	FALSE	Conditional Ready	Promotorless	EUCOMM	PCS00019_A_H02 PCP10002_A_G07	PG00019_A_1_H01 PG00019_A_1_H02 PG00019_A_2_H02 PFA0002_A_1_G07 PGS00019_A_H02 PLNS50001_D_A10 MOHFA50001_D_1_A08 MOHFA50001_D_5_A08 MOHFA50001_D_6_A08 MOHFA50001_D_8_A08 MOHFA50001_D_4_A08	L1L2_gt0	2	11
MGI:2385252	Hdac11	6	+	39814	FALSE	Conditional Ready	Promotorless	EUCOMM	PCS00019_A_F06	PGS00019_A_F06 PG00019_A_2_F06 PG00019_A_1_F07 PG00019_A_2_F07 PG00019_A_4_F08 PG00019_A_1_F06 PG00019_A_3_F08 PG00019_A_4_F09 PG00019_A_3_F06 PG00019_A_4_F07 PG00019_A_3_F07 PG00019_A_4_F06 PG00019_A_2_F08 PG00019_A_1_F08	L1L2_gt1 L1L2_st1	1	14
MGI:1343091	Hdac3	18	-	39818	FALSE	Conditional Ready	Promotorless	EUCOMM	PCS00019_A_F01	PG00019_A_1_F01 PG00019_A_3_F02 PGS00019_A_F01 PG00019_A_4_F01	L1L2_gt0	1	4
MGI:1333752	Hdac6	X	-	39819	FALSE	Conditional Ready	Promotorless	EUCOMM	PCS00019_A_B03	PG00019_A_4_B03 PGS00019_A_B03 PG00019_A_3_B03	L1L2_gt0	1	3
MGI:1917565	Hdac8	X	-	39820	FALSE	Conditional Ready	Promotorless	EUCOMM	PCS00019_A_G10	PG00019_A_2_G10 PG00019_A_3_G10 PG00019_A_4_G10 PGS00019_A_G10	L1L2_gt2	1	4
MGI:2685226	Hdx	X	-	40552	FALSE	Conditional Ready	Promotorless	EUCOMM	PCS00032_A_H11	PG00032_A_1_H11 PG00032_A_2_H10 PG00032_A_2_H11 PG00032_A_3_H11 PGS00032_A_H11 PG00032_A_4_H11	L1L2_gt0 L1L2_st2	1	6
MGI:3650286	Heatr9	11	-	44242	FALSE	Conditional Ready	Promotorless	KOMP-CSD	PCS00048_A_D05	PGS00048_A_D05 PG00048_A_1_D05	L1L2_gt1	1	2
MGI:2685817	Hecw2	1	-	47316	FALSE	Conditional Ready	Promotorless	EUCOMM	PCS00064_A_G07	PG00064_A_2_G07 PG00064_A_3_G07 PG00064_A_4_G07 PGS00064_A_G07	L1L2_gt1	1	4
MGI:106209	Hells	19	+	40184	FALSE	Conditional Ready	Promotorless	EUCOMM	PCS00030_B_A11	PG00030_C_1_A11 PG00030_C_3_A11 PG00030_C_4_A11 PGS00030_C_A11	L1L2_gt2	1	4
MGI:106209	Hells	19	+	44592	FALSE	Conditional Ready	Promotorless	EUCOMM	PCS00050_A_C06	PG00050_A_8_C06 PGS00050_A_C06	L1L2_gt0	1	2
MGI:2136910	Hemgn	4	-	384	FALSE	Conditional Ready	Promotorless	EUCOMM	PCS00005_A_H07	PG00005_A_1_H07 PG00005_A_3_H07 PG00005_A_4_H07 PGS00005_A_H07 PG00005_A_2_H07	L1L2_gt1	1	5
MGI:1332240	Heph	X	+	41087	FALSE	Conditional Ready	Promotorless	KOMP-CSD	PCS00027_A_B06	PG00027_B_4_B06 PG00027_B_3_B06 PGS00027_A_B06 PG00027_B_2_B06	L1L2_st1	1	4
MGI:2384589	Herc1	9	+	39825	FALSE	Conditional Ready	Promotorless	EUCOMM	PCS00019_A_A07	PG00019_A_2_A07 PG00019_A_3_A07 PG00019_A_4_A07 PGS00019_A_A07 MPGS8002_A_F11 PG00019_A_1_A07 MPGS8003_A_F12	L1L2_st1	1	7
MGI:1921248	Herc3	6	+	39826	TRUE	Conditional Ready	Promotorless	EUCOMM	PCS00019_A_C06	PG00019_A_1_C06 PG00019_A_1_C07 PG00019_A_1_F05 PG00019_A_2_C07 PG00019_A_2_F05 PG00019_A_3_C06 PG00019_A_3_C07 PG00019_A_4_C06 PG00019_A_4_C07 PG00019_A_4_F05 PG00019_A_2_C06 PG00019_A_3_F05 PGS00019_A_C06	L1L2_gt1	1	13
MGI:1860511	Heyl	4	+	36687	FALSE	Conditional Ready	Promotorless	KOMP-CSD	PCS00027_A_G10	PG00027_B_2_G10 PG00027_B_3_G10 PGS00027_A_G10 PG00027_B_4_G10 PG00027_B_1_G10	L1L2_gt2	1	5
MGI:104681	Hgs	11	+	163	FALSE	Conditional Ready	Promotorless	EUCOMM	PCS00004_A_E02 PCS00034_A_E02	PG00004_A_1_E02 PG00004_A_2_E02 PG00004_A_3_E02 PGS00004_A_E02 PG00034_A_3_D11 PG00034_A_5_D11 PGS00034_A_E02 PG00004_A_4_E02	L1L2_gt0	2	8
MGI:1889802	Hibadh	6	-	43329	FALSE	Conditional Ready	Promotorless	EUCOMM	PCS00051_A_A04	PG00051_A_1_A04 PG00051_A_4_A04 PGS00051_A_A04 PG00051_A_3_A04 PG00051_A_2_A04	L1L2_gt1	1	5
MGI:1338010	Hic1	11	-	51229	FALSE	Conditional Ready	Promotorless	KOMP-CSD	PCS6006_A_D12	PLB60002_B_2_G01 PLB60002_B_3_G01 PLBS60002_B_D01	pL1L2_GT1_DelLacZ_bsd	1	3
MGI:1929869	Hic2	16	+	232908	FALSE	Conditional Ready	Promotorless	KOMP-CSD	PCS00174_A_F09	PLBS60002_B_E04 PLB60002_B_1_H10	pL1L2_GT2_DelLacZ_bsd	1	2
MGI:99430	Hira	16	+	44710	FALSE	Conditional Ready	Promotorless	EUCOMM	PCS00060_A_G05	PG00060_A_1_G05 PG00060_A_2_G05 PG00060_A_3_G05 PG00060_A_4_G05 PGS00060_A_G05	L1L2_gt1	1	5
MGI:1196437	Hltf	3	+	44497	FALSE	Conditional Ready	Promotorless	KOMP-CSD	PCS00049_A_B03	PGS00049_A_B03 PGS00049_B_B03 PG00049_A_1_B03	L1L2_gt0	1	3
MGI:2677838	Hmcn2	2	+	33638	FALSE	Conditional Ready	Promotorless	EUCOMM	PCS00043_A_F10	PG00043_A_3_F10 PGS00043_A_F10	L1L2_gt1	1	2
MGI:101939	Hmgcs2	3	+	44791	FALSE	Conditional Ready	Promotorless	KOMP-CSD	PCS00052_A_A06	PG00052_A_6_A06 PG00052_A_7_A06 PGS00052_A_A06 PG00052_A_5_A06	L1L2_gt2	1	4
MGI:1918073	Hmgxb4	8	+	39828	TRUE	Conditional Ready	Promotorless	EUCOMM	PCS00019_A_F03	PLBS60002_B_B08 PLB60002_B_3_A08 PG00019_A_3_F03 PGS00019_A_F03	pL1L2_GT0_DelLacZ_bsd L1L2_gt0	1	4
MGI:1353604	Hnf4g	3	+	39940	FALSE	Conditional Ready	Promotorless	EUCOMM	PCS00030_B_E05	PG00030_C_4_E05 PGS00030_C_E05 PG00030_C_2_E05	L1L2_gt1	1	3
MGI:1353604	Hnf4g	3	+	39941	FALSE	Conditional Ready	Promotorless	EUCOMM	PCS00019_A_D12	PG00019_A_4_D12 PGS00019_A_D12 PG00019_A_3_D12 PG00019_A_1_D12 PG00019_A_2_D12	L1L2_gt2	1	5
MGI:1915231	Hormad1	3	+	41217	FALSE	Conditional Ready	Promotorless	EUCOMM	PCS00033_A_C04	PG00033_A_4_C04 PGS00033_A_C04	L1L2_gt1	1	2
MGI:96174	Hoxa2	6	-	86337	FALSE	Conditional Ready	Promotorless	KOMP-CSD	MOHPC10006_A_A01 MOHPC10006_A_A02	MOHFA0006_B_2_A01 MOHFA0006_B_3_A01 MOHFA0006_B_5_A01 MOHFA0006_B_6_A02 MOHFA0006_B_7_A02 MOHFA0006_B_8_A02 MOHFAS5006_Z_A02 MOHFA0006_B_1_A02 MOHFA0006_B_3_A02	L1L2_gt1_Del_LacZ	2	9
MGI:96175	Hoxa3	6	-	87866	TRUE	Conditional Ready	Promotorless	KOMP-CSD	MOHPC10006_A_A03 MOHPC10006_A_A04	MOHFA0006_A_2_A03 MOHFA0006_A_3_A03 MOHFA0006_A_4_A03 MOHFA0006_A_5_A03 MOHFA0006_A_5_A04 MOHFA0006_A_6_A03 MOHFA0006_A_6_A04 MOHFA0006_A_8_A03 MOHFA0006_A_8_A04 MOHFA0006_A_1_A03	L1L2_gt0_Del_LacZ	2	10
MGI:96182	Hoxb1	11	+	119038	FALSE	Conditional Ready	Promotorless	KOMP-CSD	MOHPC10006_A_A05	MOHFA0006_B_1_A05 MOHFA0006_B_2_A05 MOHFA0006_B_3_A05 MOHFA0006_B_5_A05 MOHFA0006_B_6_A05 MOHFA0006_B_7_A05 MOHFA0006_B_8_A05 MOHFAS5006_Z_A03 MOHFAS5006_Z_A04	L1L2_gt1_Del_LacZ	1	9
MGI:96183	Hoxb2	11	+	94088	FALSE	Conditional Ready	Promotorless	KOMP-CSD	MOHPC10006_A_A06	MOHFA0006_B_3_A06 MOHFA0006_B_4_A06 MOHFA0006_B_5_A06 MOHFA0006_B_8_A06 MOHFAS5006_Z_A05 MOHFAS5006_Z_A06	L1L2_gt1_Del_LacZ	1	6
MGI:109369	Hp1bp3	4	+	39829	FALSE	Conditional Ready	Promotorless	EUCOMM	PCS00019_A_C03	PG00019_A_3_C03 PG00019_A_4_C03 PGS00019_A_C03	L1L2_gt0	1	3
MGI:96217	Hprt	X	+	40635	FALSE	Conditional Ready	Promotorless	EUCOMM	PCS00033_A_F12	PG00033_A_1_F12 PG00033_A_2_F12 PG00033_A_2_G12 PGS00033_A_F12	L1L2_gt2	1	4
MGI:2153839	Hps3	3	-	42091	FALSE	Conditional Ready	Promotorless	KOMP-CSD	PCS00036_A_B09	PGS00036_A_B09 PG00036_A_1_B09 PG00036_A_2_B09 PG00036_A_4_B09 PG00036_A_3_B09	L1L2_gt2	1	5
MGI:2177742	Hps4	5	+	42021	FALSE	Conditional Ready	Promotorless	KOMP-CSD	PCS00036_A_D01	PG00036_A_4_D01 PGS00036_A_D01 PG00036_A_2_D01 PG00036_A_1_D01 PG00036_A_3_D01	L1L2_gt0	1	5
MGI:2180307	Hps5	7	-	42805	FALSE	Conditional Ready	Promotorless	EUCOMM	PCS00047_A_C01	PG00047_A_2_C01 PGS00047_A_C01	L1L2_gt0	1	2
MGI:96224	Hras	7	-	42445	FALSE	Conditional Ready	Promotorless	EUCOMM	PCS00060_A_A08	PG00060_A_4_A08 PGS00060_A_A08	L1L2_gt2	1	2
MGI:1926967	Hsd17b12	2	-	40224	FALSE	Conditional Ready	Promotorless	EUCOMM	PCS00030_B_C05	PG00030_C_1_C05 PG00030_C_2_C05 PG00030_C_3_C05 PG00030_C_4_C05 PGS00030_C_C05	L1L2_gt1	1	5
MGI:105089	Hsd17b4	18	+	40163	FALSE	Conditional Ready	Promotorless	EUCOMM	PCS00030_B_E04	PG00030_A_1_E04 PG00030_B_2_E04 PG00030_B_3_E04 PG00030_B_4_E04 PGS00030_A_E04 PGS00030_B_E04	L1L2_gt1	1	6
MGI:1330808	Hsd17b7	1	-	39985	TRUE	Conditional Ready	Promotorless	EUCOMM	PCS00030_B_D12	PG00030_B_1_D12 PGS00030_B_D12	L1L2_st2	1	2
MGI:2685585	Hsf5	11	+	61	FALSE	Conditional Ready	Promotorless	EUCOMM	PCS00005_A_B03	PG00005_A_1_B03 PG00005_A_2_B03 PG00005_A_3_B03 PG00005_A_4_B03 PGS00005_A_B03	L1L2_gt1	1	5
MGI:98817	Hsp90b1	10	-	40962	FALSE	Conditional Ready	Promotorless	EUCOMM	PCS00026_B_B03	PG00026_B_2_B03 PG00026_B_3_B03 PG00026_B_4_B03 PG00026_B_8_B03 PG00026_B_1_B03 PGS00026_B_B03	L1L2_st0	1	6
MGI:1919880	Hspa12b	2	+	39467	FALSE	Conditional Ready	Promotorless	EUCOMM	PCS00044_A_A06	PG00044_A_7_A06 PG00044_A_8_A06 PGS00044_A_A06	L1L2_gt1	1	3
MGI:107422	Hspa4l	3	+	42280	FALSE	Conditional Ready	Promotorless	KOMP-CSD	PCS00036_A_B08	PG00036_A_3_B08 PGS00036_A_B08 PG00036_A_1_B08	L1L2_gt2	1	3
MGI:1920188	Hspb11	4	+	470	FALSE	Conditional Ready	Promotorless	EUCOMM	PCS00006_A_G03 PCS00016_A_G03	PG00006_A_1_F03 PG00006_A_2_F03 PG00006_A_3_F03 PG00006_A_4_F03 PGS00006_A_F03 PG00016_B_2_G03 PG00016_B_3_G03 PG00016_B_4_G03 PGS00016_A_G03	L1L2_gt2	2	9
MGI:96257	Hspg2	4	+	48648	FALSE	Conditional Ready	Promotorless	KOMP-CSD	MOHPC10006_A_A10 MOHPC10006_A_A09	MOHFA0006_A_3_A10 MOHFA0006_A_4_A09 MOHFA0006_A_4_A10 MOHFA0006_A_6_A09 MOHFA0006_A_7_A10 MOHFA0006_B_2_A09 MOHFA0006_B_4_A09 MOHFA0006_B_7_A10 MOHFAS5006_Z_A07 MOHFAS5006_Z_A08 MOHFA0006_A_1_A10 MOHFA0006_A_5_A10	L1L2_gt0_Del_LacZ	2	12
MGI:105053	Hsph1	5	-	40280	FALSE	Conditional Ready	Promotorless	EUCOMM	PCS00030_B_H11	PG00030_C_4_H11 PGS00030_C_H11	L1L2_gt0	1	2
MGI:96067	Htt	5	+	48497	FALSE	Conditional Ready	Promotorless	EUCOMM	MOHPC10006_A_A12	MOHFA0006_B_2_A12 MOHFA0006_B_6_A12 MOHFA0006_B_8_A12 MOHFAS5006_Z_A10 MOHFA0006_B_5_A12 MOHFAS5006_Z_A09	L1L2_gt2_Del_LacZ	1	6
MGI:3588284	I830077J02Rik	3	-	44979	FALSE	Conditional Ready	Promotorless	KOMP-CSD	PCS00052_A_D08	PG00052_A_7_D08 PG00052_A_5_D08 PG00052_A_8_D08 PGS00052_A_D08	L1L2_gt1	1	4
MGI:96382	Iapp	6	+	43532	FALSE	Conditional Ready	Promotorless	EUCOMM	PCS00047_A_E11	PG00047_A_2_E11 PGS00047_A_E11	L1L2_st2	1	2
MGI:96412	Ide	19	-	47938	FALSE	Conditional Ready	Promotorless	EUCOMM	MOHPC10006_A_B01 MOHPC10006_A_B02 PCP10002_A_C03	MOHFA0006_B_1_B01 MOHFA0006_B_1_B02 MOHFA0006_B_2_B01 MOHFA0006_B_3_B01 MOHFA0006_B_3_B02 MOHFA0006_B_5_B01 MOHFA0006_B_5_B02 MOHFA0006_B_8_B01 MOHFAS5006_Z_A12 PFA0002_A_5_C03	L1L2_gt2_Del_LacZ L1L2_gt2	3	10
MGI:96416	Ido1	8	-	40925	FALSE	Conditional Ready	Promotorless	EUCOMM	PCS00030_B_G02	PG00030_B_4_G02 PG00030_C_1_G02 PG00030_C_2_G02 PG00030_C_3_G02 PG00030_C_4_G02 PGS00030_B_G02 PGS00030_C_G02	L1L2_gt0	1	7
MGI:96417	Ids	X	-	47325	FALSE	Conditional Ready	Promotorless	EUCOMM	PCS00063_A_G10	PG00063_B_1_G10 PG00063_B_2_G10 PG00063_B_3_G10 PG00063_B_4_G10 PGS00063_A_G10	L1L2_st0	1	5
MGI:2140675	Iffo2	4	+	558	FALSE	Conditional Ready	Promotorless	EUCOMM	PCS00007_A_B09 PCS00017_A_B09	PGS00007_A_B09 PG00017_B_4_B09 PGS00017_A_B09 PG00017_B_2_B09	L1L2_gt0	2	4
MGI:2443016	Ifi44	3	-	41654	FALSE	Conditional Ready	Promotorless	KOMP-CSD	PCS00031_A_B09	PGS00031_A_B09 PG00031_A_2_B09 PG00031_B_2_B09 PG00031_A_4_B09 PG00031_A_1_B09	L1L2_gt2	1	5
MGI:2146906	Ift140	17	+	43321	FALSE	Conditional Ready	Promotorless	KOMP-CSD	PCS00045_A_A02	PG00045_A_6_A02 PG00045_D_2_A02 PGS00045_D_A02 PG00045_A_5_A02 PG00045_D_1_A02 PG00045_D_3_A02	L1L2_gt0	1	6
MGI:1915585	Ift20	11	+	7	FALSE	Conditional Ready	Promotorless	EUCOMM	PCS00005_A_A03 PCS00035_A_A03	PG00005_A_1_A03 PG00005_A_2_A03 PG00005_A_3_A03 PG00005_A_4_A03 PGS00005_A_A03 PG00035_A_1_A08 PG00035_A_2_A03 PG00035_A_2_A08 PGS00035_A_A03	L1L2_gt1	2	9
MGI:1890358	Igf2bp2	16	-	44275	FALSE	Conditional Ready	Promotorless	EUCOMM	PCS00054_B_D09	PG00054_A_2_D09 PG00054_A_3_D09 PG00054_A_4_D09 PGS00054_A_D09 PG00054_A_1_D09	L1L2_gt2	1	5
MGI:96439	Igfbp4	11	+	38472	FALSE	Conditional Ready	Promotorless	KOMP-CSD	PCS00027_A_D04	GR00030_G08	L1L2_st1	1	1
MGI:1933198	Igfbpl1	4	-	379	FALSE	Conditional Ready	Promotorless	EUCOMM	PCS00005_A_H06	PG00005_A_1_H06 PG00005_A_2_H06 PG00005_A_3_H06 PGS00005_A_H06 PG00005_A_4_H06	L1L2_gt1	1	5
MGI:99954	Ighmbp2	19	-	46207	FALSE	Conditional Ready	Promotorless	EUCOMM	PCS00060_A_B07	PG00060_A_2_B07 PG00060_A_3_B07 PG00060_A_4_B07 PGS00060_A_B07	L1L2_gt1	1	4
MGI:1914544	Ikbkap	4	-	36168	FALSE	Conditional Ready	Promotorless	KOMP-CSD	PCS00023_E_D03	PG00023_E_2_D03 PG00023_E_4_D03 PG00023_E_1_D03 PGS00023_E_D03	L1L2_gt0	1	4
MGI:1338071	Ikbkb	8	-	39952	FALSE	Conditional Ready	Promotorless	EUCOMM	MOHPC10006_A_B03 MOHPC10006_A_B04 PCS00019_A_E03	MOHFA0006_A_2_B03 MOHFA0006_A_3_B03 MOHFA0006_A_4_B04 MOHFA0006_A_5_B03 MOHFA0006_A_6_B03 MOHFA0006_A_7_B03 MOHFA0006_A_8_B04 MOHFA0006_B_1_B04 MOHFA0006_B_2_B03 MOHFA0006_B_2_B04 MOHFA0006_B_4_B03 MOHFA0006_B_4_B04 MOHFA0006_B_5_B03 MOHFA0006_B_5_B04 MOHFA0006_B_6_B04 MOHFAS5006_Z_B01 MOHFAS5006_Z_B02 PLB60002_B_4_A07 PLB60002_B_1_A07 PLBS60002_B_B11 PLB60002_B_3_A07 PG00019_A_3_E03 PG00019_A_3_…	L1L2_gt0_Del_LacZ pL1L2_GT0_DelLacZ_bsd L1L2_gt0	3	32
MGI:1338074	Ikbkg	X	+	44104	FALSE	Conditional Ready	Promotorless	EUCOMM	PCS00046_A_D06	PGS00046_A_D06 PG00046_A_3_D06	L1L2_gt1	1	2
MGI:96537	Il10	1	+	41047	FALSE	Conditional Ready	Promotorless	EUCOMM	PCS00030_B_B02	PG00030_C_1_B02 PG00030_C_3_B02 PG00030_C_4_B02 PGS00030_C_B02	L1L2_st0	1	4
MGI:1916927	Il1f8	2	+	42766	FALSE	Conditional Ready	Promotorless	KOMP-CSD	PCS00046_A_D01	PG00046_A_2_D06 PG00046_A_4_D06 PG00046_A_3_D01 PG00046_A_1_D01 PGS00046_A_D01 PG00046_A_4_D01	L1L2_gt1 L1L2_gt0	1	6
MGI:2663588	Il22ra1	4	+	39175	FALSE	Conditional Ready	Promotorless	EUCOMM	MOHPC10006_A_B07 MOHPC10006_A_B08 PCS00011_A_G05 PCS00043_A_G05	MOHFA0006_A_3_B07 MOHFA0006_A_3_B08 MOHFA0006_A_4_B07 MOHFA0006_A_5_B07 MOHFA0006_A_6_B07 MOHFA0006_A_7_B07 MOHFA0006_A_8_B07 MOHFA0006_B_1_B07 MOHFA0006_B_5_B07 MOHFA0006_B_6_B07 MOHFA0006_B_7_B07 MOHFA0006_B_8_B07 MOHFAS5006_Z_B03 MOHFAS5006_Z_B04 PG00011_A_1_G05 PG00011_A_2_G05 PG00011_A_2_G07 PGS00011_A_G05 PG00043_A_4_G04 PGS00043_A_G05 MOHFA0006_B_2_B07 MOHFA0006_A_1_B07	L1L2_gt1_Del_LacZ L1L2_gt1 L1L2_gt0 L1L2_st1	4	22
MGI:1923777	Il34	8	-	45791	FALSE	Conditional Ready	Promotorless	EUCOMM	PCS00060_A_E10	PG00060_A_1_E10 PG00060_A_2_E10 PG00060_A_3_E10 PG00060_A_4_E10 PGS00060_A_E10	L1L2_st1	1	5
MGI:1913791	Immp1l	2	+	44071	FALSE	Conditional Ready	Promotorless	KOMP-CSD	PCS00048_A_E06	PG00048_A_2_E06 PG00048_A_3_E06 PG00048_A_4_E06 PGS00048_A_E06	L1L2_gt2	1	4
MGI:1915720	Impad1	4	-	35826	FALSE	Conditional Ready	Promotorless	KOMP-CSD	PCS00021_A_D02	PGS00021_A_D02 PGS00021_B_D02 PG00021_B_3_D02	L1L2_gt0 L1L2_st0	1	3
MGI:1919027	Ing3	6	+	39832	FALSE	Conditional Ready	Promotorless	EUCOMM	PCS00019_A_E05	PG00019_A_3_E05 PG00019_A_3_E08 PG00019_A_4_E05 PGS00019_A_E05	L1L2_gt1 L1L2_st1	1	4
MGI:1913459	Inip	4	-	415	FALSE	Conditional Ready	Promotorless	EUCOMM	PCS00017_A_A10	PGS00017_A_A10 PG00017_B_3_A10	L1L2_gt1	1	2
MGI:102963	Inmt	6	-	45229	FALSE	Conditional Ready	Promotorless	KOMP-CSD	PCS00055_A_D04	PG00055_A_1_D04 PG00055_A_2_D04 PG00055_A_3_D04 PG00055_A_8_D04 PGS00055_A_D04 PGS00055_B_D04 PG00055_A_4_D04	L1L2_gt1	1	7
MGI:3027003	Ino80d	1	-	33693	TRUE	Conditional Ready	Promotorless	EUCOMM	PCS00040_A_G09	PG00040_A_2_G09 PGS00040_A_G09	L1L2_gt1	1	2
MGI:2141881	Ino80e	7	-	47248	FALSE	Conditional Ready	Promotorless	EUCOMM	PCS00064_A_A07	PG00064_A_3_A07 PG00064_A_2_A07	L1L2_gt1	1	2
MGI:104848	Inpp1	1	-	44992	FALSE	Conditional Ready	Promotorless	KOMP-CSD	MOHPC10006_A_B10 MOHPC10006_A_B09 PCS00052_A_A03 PCP10002_A_C04	MOHFA0006_B_1_B10 MOHFA0006_B_2_B09 MOHFA0006_B_3_B09 MOHFA0006_B_3_B10 MOHFA0006_B_4_B09 MOHFA0006_B_4_B10 MOHFA0006_B_5_B10 MOHFA0006_B_6_B09 MOHFA0006_B_7_B09 MOHFA0006_B_7_B10 MOHFAS5006_Z_B05 PG00052_A_5_A03 PG00052_A_8_A03 PGS00052_A_A03 PG00052_A_2_A03 PFA0002_A_3_C04 PFA0002_A_4_C04 PFA0002_A_5_C04 PFA0002_A_6_C04 PFA0002_A_7_C04 PFA0002_A_8_C04 MOHFA0006_B_6_B10 MOHFAS5006_Z_B06	L1L2_gt0_Del_LacZ L1L2_gt0	4	23
MGI:1918135	Ints10	8	+	42337	FALSE	Conditional Ready	Promotorless	KOMP-CSD	PCS00036_A_E03	PG00036_A_4_E03 PGS00036_A_E03 PG00036_A_1_E03	L1L2_gt0	1	3
MGI:1919043	Ints12	3	+	41973	FALSE	Conditional Ready	Promotorless	EUCOMM	PCS00032_A_C01	PG00032_A_1_C01 PG00032_A_2_C01 PG00032_A_3_C01 PG00032_A_4_C01 PGS00032_A_C01	L1L2_gt0	1	5
MGI:2442593	Ints6l	X	+	41150	FALSE	Conditional Ready	Promotorless	KOMP-CSD	PCS00027_A_C01	PG00027_B_1_C01 PG00027_B_2_C01 PG00027_B_4_C01 PG00027_B_3_C01 PGS00027_A_C01	L1L2_gt0	1	5
MGI:1335082	Invs	4	+	33843	FALSE	Conditional Ready	Promotorless	EUCOMM	PCS00043_A_B10	PG00043_A_4_B10 PGS00043_A_B10	L1L2_gt1	1	2
MGI:1335082	Invs	4	+	40361	TRUE	Conditional Ready	Promotorless	EUCOMM	PCS00029_A_F07	PG00029_A_2_F07 PGS00029_A_F07	L1L2_gt0	1	2
MGI:2444159	Ipcef1	10	-	42140	TRUE	Conditional Ready	Promotorless	KOMP-CSD	PCS00036_A_D11	PG00036_A_3_D11 PG00036_A_2_D11 PGS00036_A_D11	L1L2_gt2	1	3
MGI:2443764	Iqcb1	16	+	43457	FALSE	Conditional Ready	Promotorless	EUCOMM	PCS00054_B_G04	PGS00054_A_G04 PG00054_A_1_G04	L1L2_gt2	1	2
MGI:1922982	Iqcd	5	+	43795	FALSE	Conditional Ready	Promotorless	EUCOMM	PCS00050_A_E03	PG00050_A_3_E03 PG00050_A_5_E03 PG00050_A_7_E03 PG00050_A_8_E03 PGS00050_A_E03	L1L2_gt0	1	5
MGI:2677208	Iqsec3	6	-	42046	FALSE	Conditional Ready	Promotorless	KOMP-CSD	PCS00036_A_F09	PG00036_A_4_F09 PGS00036_A_F09 PG00036_A_1_F09 PG00036_A_2_F09	L1L2_gt2	1	4
MGI:107420	Irak1	X	-	40593	FALSE	Conditional Ready	Promotorless	EUCOMM	PCS00033_A_B02	PG00033_A_4_B02 PGS00033_A_B02	L1L2_gt0	1	2
MGI:2182474	Irak4	15	+	40118	FALSE	Conditional Ready	Promotorless	EUCOMM	PCS00030_B_F04	PG00030_B_3_F04 PGS00030_B_F04	L1L2_gt1	1	2
MGI:96590	Irf1	11	+	274	FALSE	Conditional Ready	Promotorless	EUCOMM	PCS00004_A_G11	PG00004_A_1_G11 PG00004_A_3_G11 PG00004_A_4_G11 PGS00004_A_G11	L1L2_gt0	1	4
MGI:96590	Irf1	11	+	39977	FALSE	Conditional Ready	Promotorless	EUCOMM	PCS00019_A_D03	MOHFA50001_D_4_A09 MOHFA50001_D_3_A09 MOHFA50001_D_2_A09 PG00019_A_1_D03 PG00019_A_4_D03 PGS00019_A_D03 PG00019_A_3_D03	L1L2_gt0	1	7
MGI:2442963	Ism1	2	+	39456	FALSE	Conditional Ready	Promotorless	EUCOMM	PCS00043_A_A02	PG00043_A_4_A02 PGS00043_A_A02	L1L2_st0	1	2
MGI:109442	Itga8	2	-	39262	FALSE	Conditional Ready	Promotorless	EUCOMM	PCS00043_A_C10	PG00043_A_2_C10 PGS00043_A_C10	L1L2_gt1	1	2
MGI:96611	Itgb2	10	+	40494	FALSE	Conditional Ready	Promotorless	EUCOMM	PCS00026_B_A05	PG00026_B_4_A05 PG00026_B_7_A05 PGS00026_B_A05	L1L2_st1	1	3
MGI:96613	Itgb4	11	+	144	FALSE	Conditional Ready	Promotorless	EUCOMM	PCS00006_A_C09 PCS00016_A_C09	PG00006_A_3_C04 PG00006_A_4_C04 PGS00006_A_C04 PG00016_B_1_C09 PG00016_B_2_C09 PG00016_B_4_C09 PGS00016_A_C09 PG00016_B_3_C09	L1L2_gt2 L1L2_st2	2	8
MGI:96614	Itgb5	16	+	46356	FALSE	Conditional Ready	Promotorless	EUCOMM	MOHPC10006_A_B12 MOHPC10006_A_B11	MOHFA0006_B_1_B12 MOHFA0006_B_2_B11 MOHFA0006_B_3_B11 MOHFA0006_B_3_B12 MOHFA0006_B_4_B11 MOHFA0006_B_4_B12 MOHFA0006_B_5_B12 MOHFA0006_B_6_B11 MOHFA0006_B_8_B11 MOHFAS5006_Z_B07 MOHFAS5006_Z_B08 MOHFA0006_B_1_B11	L1L2_gt2_Del_LacZ	2	12
MGI:109536	Itih4	14	+	44787	FALSE	Conditional Ready	Promotorless	KOMP-CSD	PCS00052_A_E09	PG00052_A_7_E09 PG00052_A_6_E09 PG00052_A_5_E09 PGS00052_A_E09 PG00052_A_8_E09	L1L2_st0	1	5
MGI:96621	Itk	11	-	33784	TRUE	Conditional Ready	Promotorless	EUCOMM	PCS00040_A_A01	PG00040_A_4_A01 PGS00040_A_A01	L1L2_gt0	1	2
MGI:1920723	Iws1	18	+	193816	FALSE	Conditional Ready	Promotorless	KOMP-CSD	PCS00131_A_C06	PLB60002_B_4_F01 PLB60002_B_1_F01 PLBS60002_B_D10 PLB60002_B_3_F01	pL1L2_GT1_DelLacZ_bsd	1	4
MGI:1924151	Jade2	11	-	33789	FALSE	Conditional Ready	Promotorless	EUCOMM	PCS00040_A_G05	PG00040_A_1_G05 PGS00040_A_G05	L1L2_gt1	1	2
MGI:2148019	Jade3	X	+	39865	FALSE	Conditional Ready	Promotorless	EUCOMM	PCS00019_A_C11	PG00019_A_1_C11 PG00019_A_2_C11 PG00019_A_3_C11 PG00019_A_4_C11 PGS00019_A_C11	L1L2_gt2	1	5
MGI:96628	Jak1	4	-	458	TRUE	Conditional Ready	Promotorless	EUCOMM	PCS00007_A_E06 PCS00017_A_E06	PG00007_B_2_E06 PG00007_B_2_E11 PG00007_B_4_E06 PGS00007_A_E06 PG00017_B_4_E06 PGS00017_A_E06	L1L2_gt0 L1L2_gt1	2	6
MGI:104813	Jarid2	13	+	47358	FALSE	Conditional Ready	Promotorless	KOMP-CSD	PCS00013_A_H05	PGS00013_A_B02	L1L2_gt0	1	1
MGI:1891496	Jph2	2	-	29386	FALSE	Conditional Ready	Promotorless	EUCOMM	PCS00008_A_A11	PG00008_A_2_A11 PG00008_A_3_A11 PGS00008_A_A11	L1L2_gt1	1	3
MGI:96650	Jup	11	-	33830	FALSE	Conditional Ready	Promotorless	EUCOMM	PCS00044_A_C11 MOHPC10006_A_C01 MOHPC10006_A_C02	PG00044_A_6_C11 PGS00044_A_C11 MOHFA0006_B_1_C01 MOHFA0006_B_1_C02 MOHFA0006_B_2_C01 MOHFA0006_B_3_C02 MOHFA0006_B_4_C01 MOHFA0006_B_5_C01 MOHFA0006_B_5_C02 MOHFA0006_B_6_C01 MOHFA0006_B_6_C02 MOHFA0006_B_7_C02 MOHFA0006_B_8_C01 MOHFA0006_B_8_C02 MOHFAS5006_Z_B09 MOHFAS5006_Z_B10 MOHFA0006_B_3_C01 MOHFA0006_B_4_C02	L1L2_gt2 L1L2_gt2_Del_LacZ	3	18
MGI:3043381	Kank4	4	-	46992	FALSE	Conditional Ready	Promotorless	EUCOMM	PCS00064_A_F05	PG00064_A_1_F05 PG00064_A_2_F05 PGS00064_A_F05	L1L2_gt1	1	3
MGI:1343101	Kat2a	11	-	43942	FALSE	Conditional Ready	Promotorless	EUCOMM	PCS00054_B_B09	PG00054_A_4_B09 PGS00054_A_B09	L1L2_gt2	1	2
MGI:2442415	Kat6a	8	+	39853	TRUE	Conditional Ready	Promotorless	EUCOMM	PCS00019_A_H03	PG00019_A_1_H03 PG00019_A_2_H03 PG00019_A_3_H03 PG00019_A_4_G03 PG00019_A_4_H03 PGS00019_A_H03 PG00019_A_4_H04	L1L2_gt0	1	7
MGI:2384811	Kbtbd2	6	-	43544	FALSE	Conditional Ready	Promotorless	EUCOMM	PCS00054_B_C05	PG00054_A_1_C05 PG00054_A_3_C05 PG00054_A_4_C05 PGS00054_A_C05 PG00054_A_2_C05	L1L2_gt2	1	5
MGI:2156184	Kcnh4	11	-	43941	FALSE	Conditional Ready	Promotorless	KOMP-CSD	PCS00048_A_A07	PGS00048_A_A07 PG00048_A_4_A07 PG00048_A_3_A07	L1L2_gt0	1	3
MGI:2684139	Kcnh6	11	+	111	FALSE	Conditional Ready	Promotorless	EUCOMM	PCS00004_A_D02	PG00004_A_1_D02 PG00004_A_2_D02 PG00004_A_3_D02 PGS00004_A_D02 PG00004_A_4_D02	L1L2_gt0	1	5
MGI:1917607	Kcnip1	11	-	245	FALSE	Conditional Ready	Promotorless	EUCOMM	PCS00004_A_F12	PG00004_A_4_F12 PGS00004_A_F12 PG00004_A_1_F12	L1L2_gt0	1	3
MGI:2385276	Kctd15	7	-	47323	FALSE	Conditional Ready	Promotorless	EUCOMM	PCS00064_A_A05	PG00064_A_1_A05 PGS00064_A_A05	L1L2_gt0	1	2
MGI:1917632	Kctd2	11	+	137	FALSE	Conditional Ready	Promotorless	EUCOMM	PCS00004_A_D08 PCS00034_A_D08	PG00004_A_2_D08 PG00004_A_4_D08 PGS00004_A_D08 PG00034_A_4_E05 PG00034_A_4_G06 PG00034_A_5_G06 PG00034_A_7_E05 PG00034_A_7_G06 PG00034_A_8_E05 PG00034_A_8_G06 PGS00034_A_D08 PG00004_A_3_D08	L1L2_gt0	2	12
MGI:1916323	Kdf1	4	+	47031	FALSE	Conditional Ready	Promotorless	EUCOMM	PCS00064_A_C04	PG00064_A_1_C04 PG00064_A_3_C04 PGS00064_A_C04	L1L2_gt0	1	3
MGI:1354736	Kdm2a	19	-	237029	TRUE	Conditional Ready	Promotorless	KOMP-CSD	MOHPC10006_A_C03 PCP10002_A_F08	MOHFA0006_B_1_C03 MOHFA0006_B_2_C03 MOHFA0006_B_3_C03 MOHFA0006_B_4_C03 MOHFA0006_B_5_C03 MOHFA0006_B_6_C03 MOHFAS5006_Z_B11 MOHFAS5006_Z_B12 PFA0002_A_1_F08 PFA0002_A_2_F08 PFA0002_A_3_F08 PFA0002_A_4_F08 MOHFA0006_B_8_C03	L1L2_gt0_Del_LacZ L1L2_gt0	2	13
MGI:2446210	Kdm4a	4	-	474	FALSE	Conditional Ready	Promotorless	EUCOMM	PCS00017_A_A07	MOHFA50001_D_3_A03 MOHFA50001_D_2_A03 MOHFA50001_D_8_A03 MOHFA50001_D_5_A03 MOHFA50001_D_1_A03 MOHFA50001_D_4_A03 MOHFA50001_D_7_A03 PG00017_B_1_A07 PG00017_B_3_A07 PGS00017_A_A07 PG00017_B_2_A07	L1L2_gt0	1	11
MGI:2442355	Kdm4b	17	+	42798	FALSE	Conditional Ready	Promotorless	EUCOMM	PCS00046_A_E01	MOHFA50001_D_8_B04 MOHFA50001_D_4_B04 MOHFA50001_D_6_B04 PLNS50001_D_B10 PG00046_A_2_E01 PG00046_A_4_E01 PGS00046_A_E01	L1L2_gt0	1	7
MGI:1924054	Kdm4c	4	+	36279	FALSE	Conditional Ready	Promotorless	KOMP-CSD	PCS00023_E_C01	PGS00023_E_C01 PG00023_E_3_C01 PG00023_E_1_C01 PG00023_E_2_C01 MOHFA50001_D_3_A10 MOHFA50001_D_6_A10 MOHFA50001_D_1_A09 MOHFA50001_D_2_A10 MOHFA50001_D_8_A10 MOHFA50001_D_1_A10 PLNS50001_D_A05	L1L2_gt0	1	11
MGI:2136980	Kdm5a	6	+	174484	FALSE	Conditional Ready	Promotorless	EUCOMM	MOHPC10006_A_C04	MOHFA0006_B_7_C04 MOHFAS5006_Z_C01	L1L2_gt0_Del_LacZ	1	2
MGI:1922855	Kdm5b	1	+	39833	TRUE	Conditional Ready	Promotorless	EUCOMM	PCS00019_A_C04 PCP10002_A_G06	PG00019_A_1_C04 PG00019_A_2_C04 PG00019_A_4_C04 PGS00019_A_C04 PFA0002_A_1_G06 PFA0002_A_2_G06 PFA0002_A_3_G06 PFA0002_A_4_G06 PFA0002_A_7_G06 PFA0002_A_8_G06 PG00019_A_3_C04 MOHFA50001_D_3_A06 MOHFA50001_D_7_A06 MOHFA50001_D_2_A06 MOHFA50001_D_1_A06 MOHFA50001_D_8_A06 PLNS50001_D_A11	L1L2_gt0	2	17
MGI:1095419	Kdm6a	X	+	42815	FALSE	Conditional Ready	Promotorless	EUCOMM	PCS00046_A_F01	PG00046_A_1_F01 PGS00046_A_F01 MOHFA50001_D_1_B05 MOHFA50001_D_8_B05 MOHFA50001_D_6_B05	L1L2_gt0	1	5
MGI:1924285	Kdm8	7	+	42101	FALSE	Conditional Ready	Promotorless	EUCOMM	PCS00037_A_B03	PG00037_A_3_B03 PGS00037_A_B03 PG00037_A_4_B03	L1L2_gt0	1	3
MGI:1346053	Kel	6	-	44783	TRUE	Conditional Ready	Promotorless	KOMP-CSD	PCS00052_A_B07	PG00052_A_6_B07 PG00052_A_7_B07 PG00052_A_8_B07 PG00052_A_3_B07 PG00052_A_5_B07 PGS00052_A_B07	L1L2_gt0	1	6
MGI:1098229	Kif17	4	+	551	FALSE	Conditional Ready	Promotorless	EUCOMM	PCS00006_A_H09	PG00006_A_1_G04 PG00006_A_1_H09 PG00006_A_3_G04 PG00006_A_3_H09 PG00006_A_4_G04 PG00006_A_4_H09 PGS00006_A_G04 PGS00006_A_H09 PG00006_A_2_H09	L1L2_gt2	1	9
MGI:2446979	Kif18b	11	-	43221	FALSE	Conditional Ready	Promotorless	EUCOMM	PCS00050_A_D02	PG00050_A_1_D02 PG00050_A_2_D02 PG00050_A_3_D02 PG00050_A_4_D02 PG00050_A_5_D02 PG00050_A_7_D02 PGS00050_A_D02	L1L2_gt0	1	7
MGI:1921054	Kif2c	4	-	44460	FALSE	Conditional Ready	Promotorless	EUCOMM	PCS00051_A_F08	PG00051_A_1_C06 PG00051_A_3_C06 PG00051_A_4_C06 PGS00051_A_F08 PG00051_A_4_F08	L1L2_gt1	1	5
MGI:107689	Kif3a	11	+	272	FALSE	Conditional Ready	Promotorless	EUCOMM	MOHPC10006_A_C07 PCS00004_A_G09	MOHFA0006_B_2_C07 MOHFA0006_B_4_C07 MOHFA0006_B_5_C07 MOHFAS5006_Z_C02 MOHFAS5006_Z_C03 PLBS60002_B_A08 PG00004_A_1_G09 PG00004_A_3_G09 PG00004_A_4_G09 PGS00004_A_G09 PG00004_A_2_G09 MOHFA0006_B_6_C07 MOHFA0006_B_1_C07	L1L2_gt0_Del_LacZ pL1L2_GT0_DelLacZ_bsd L1L2_gt0	2	13
MGI:1098237	Kif9	9	+	40290	TRUE	Conditional Ready	Promotorless	EUCOMM	PCS00029_A_C05	PG00029_A_1_C05 PG00029_A_1_D05 PG00029_A_2_C06 PG00029_A_3_C05 PG00029_A_3_D05 PG00029_A_4_C06 PG00029_A_4_D05 PGS00029_A_C05	L1L2_gt0	1	8
MGI:107566	Kifap3	1	+	40466	FALSE	Conditional Ready	Promotorless	KOMP-CSD	PCS00026_B_E06	PGS00026_B_E06 PGS00026_A_E06 PG00026_A_2_E06 PG00026_A_1_E06 PG00026_B_3_E06 PG00026_B_4_E06 PG00026_B_5_E06	L1L2_gt1	1	7
MGI:1914953	Kirrel3	9	+	39576	FALSE	Conditional Ready	Promotorless	EUCOMM	PCS00044_A_C07	PG00044_A_5_C07 PG00044_A_6_C07 PG00044_A_7_C07 PG00044_A_8_C02 PG00044_A_8_C07 PG00044_A_8_C08 PGS00044_A_C07	L1L2_gt1 L1L2_st1	1	7
MGI:96677	Kit	5	+	33626	FALSE	Conditional Ready	Promotorless	EUCOMM	PCS00008_A_B08	PG00008_A_1_B08 PG00008_A_2_B08 PG00008_A_3_B08 PGS00008_A_B08	L1L2_gt1	1	4
MGI:1929988	Klf15	6	+	43421	FALSE	Conditional Ready	Promotorless	EUCOMM	PCS00050_A_G09	PG00050_A_2_G09 PG00050_A_5_G09 PG00050_A_6_G09 PG00050_A_8_G09 PG00050_A_4_G09 PGS00050_A_G09	L1L2_gt0	1	6
MGI:2181068	Klf17	4	-	43931	FALSE	Conditional Ready	Promotorless	KOMP-CSD	PCS00045_A_D03	PGS00045_D_D03 PGS00045_A_D03 PG00045_A_6_D03 PG00045_D_2_D03 PG00045_B_3_D03	L1L2_gt0	1	5
MGI:1338056	Klf5	14	+	208531	FALSE	Conditional Ready	Promotorless	KOMP-CSD	MOHPC10006_A_C08 MOHPC10006_A_C09	MOHFA0006_B_2_C08 MOHFA0006_B_3_C09 MOHFA0006_B_6_C09 MOHFA0006_B_7_C08 MOHFA0006_B_8_C08 MOHFA0006_B_8_C09 MOHFAS5006_Z_C05 MOHFAS5006_Z_C04	L1L2_gt0_Del_LacZ	2	8
MGI:2672853	Klhdc1	12	+	42311	FALSE	Conditional Ready	Promotorless	KOMP-CSD	PCS00036_A_A04	PG00036_A_4_A04 PGS00036_A_A04 PG00036_A_2_A04 PG00036_A_1_A04 PG00036_A_3_A04	L1L2_gt0	1	5
MGI:2136335	Klhl1	14	-	41806	TRUE	Conditional Ready	Promotorless	KOMP-CSD	PCS00031_A_E07	PGS00031_A_E07 PG00031_B_1_E07 PG00031_B_3_E07	L1L2_gt2	1	3
MGI:2143315	Klhl18	9	-	42066	FALSE	Conditional Ready	Promotorless	KOMP-CSD	PCS00036_A_D09	PGS00036_A_D09 PG00036_A_3_D09 PG00036_A_2_D09 PG00036_A_4_D09	L1L2_gt2	1	4
MGI:1918038	Klhl30	1	+	45087	FALSE	Conditional Ready	Promotorless	KOMP-CSD	PCS00055_A_D01	PG00055_A_7_D01 PG00055_A_8_D01 PGS00055_A_D01 PG00055_A_6_D01 PG00055_A_4_D01 PGS00055_B_D01	L1L2_gt0	1	6
MGI:3612790	Klhl32	4	-	193	FALSE	Conditional Ready	Promotorless	EUCOMM	PCS00006_A_D03 PCS00016_A_D03	PG00006_A_1_C09 PG00006_A_3_C09 PG00006_A_4_C09 PGS00006_A_C09 PGS00016_A_D03	L1L2_gt2	2	5
MGI:2138151	Kmo	1	+	44005	FALSE	Conditional Ready	Promotorless	KOMP-CSD	PCS00048_A_C07	PG00048_A_2_C07 PGS00048_A_C07	L1L2_gt0	1	2
MGI:96995	Kmt2a	9	-	40303	FALSE	Conditional Ready	Promotorless	EUCOMM	MOHPC10006_A_D09 MOHPC10006_A_D08	MOHFA0006_A_1_D09 MOHFA0006_A_2_D08 MOHFA0006_A_2_D09 MOHFA0006_A_3_D08 MOHFA0006_A_4_D08 MOHFA0006_A_4_D09 MOHFA0006_A_5_D08 MOHFA0006_A_5_D09 MOHFA0006_A_6_D08 MOHFA0006_A_6_D09 MOHFA0006_A_7_D08 MOHFA0006_A_7_D09 MOHFA0006_A_8_D08 MOHFA0006_A_8_D09 MOHFA0006_B_4_D08 MOHFAS5006_Z_D05 MOHFAS5006_Z_D06 MOHFA0006_A_1_D08	L1L2_gt0_Del_LacZ	2	18
MGI:2444959	Kmt2c	5	-	190385	FALSE	Conditional Ready	Promotorless	KOMP-CSD	MOHPC10006_A_D10	MOHFA0006_B_1_D10 MOHFA0006_B_4_D10 MOHFAS5006_Z_D07 MOHFAS5006_Z_D08	L1L2_gt1_Del_LacZ	1	4
MGI:2444557	Kmt5b	19	+	39901	FALSE	Conditional Ready	Promotorless	KOMP-CSD	PCS00019_A_A12	PG00019_A_4_A12 PG00019_A_3_A12 PG00019_A_3_A11 PGS00019_A_A12 PG00019_A_1_A12 PG00019_A_2_A12 PG00019_A_1_A11 PG00019_A_4_A11 PG00019_A_2_A11	L1L2_gt2 L1L2_st2	1	9
MGI:2444557	Kmt5b	19	+	47356	FALSE	Conditional Ready	Promotorless	KOMP-CSD	PCS00013_A_E03	PGS00013_A_A09	L1L2_gt1	1	1
MGI:1913606	Knop1	7	-	44091	FALSE	Conditional Ready	Promotorless	EUCOMM	PCS00047_A_E08	PG00047_A_1_E08 PGS00047_A_E08	L1L2_gt0	1	2
MGI:2141165	Kpna7	5	-	45111	FALSE	Conditional Ready	Promotorless	KOMP-CSD	PCS00055_A_A03	PGS00055_A_A03 PG00055_A_2_A03 PGS00055_B_A03	L1L2_gt1	1	3
MGI:96680	Kras	6	-	43312	FALSE	Conditional Ready	Promotorless	EUCOMM	PCS00047_A_B04	PG00047_A_4_B04 PGS00047_A_B04	L1L2_gt0	1	2
MGI:2442728	Krt222	11	-	362	FALSE	Conditional Ready	Promotorless	EUCOMM	PCS00007_A_F02	PG00007_B_1_F02 PG00007_B_2_F02 PGS00007_A_F02	L1L2_gt0	1	3
MGI:2148866	Krt23	11	-	198	FALSE	Conditional Ready	Promotorless	EUCOMM	PCS00004_A_E08	PG00004_A_1_E08 PG00004_A_2_E08 PG00004_A_3_E08 PGS00004_A_E08 PG00004_A_4_E08	L1L2_gt0	1	5
MGI:1922956	Krt24	11	-	364	FALSE	Conditional Ready	Promotorless	EUCOMM	PCS00007_A_G02	PG00007_B_4_G02 PGS00007_A_G02 PG00007_B_1_G02	L1L2_gt0	1	3
MGI:1918060	Krt25	11	-	38468	FALSE	Conditional Ready	Promotorless	KOMP-CSD	PCS00027_A_H11	PGS00027_A_H11 PG00027_B_2_H11 PG00027_B_1_H11 PG00027_B_2_G12 PG00027_B_3_H11 PG00027_B_4_H11	L1L2_gt2	1	6
MGI:2444913	Krt26	11	-	38477	FALSE	Conditional Ready	Promotorless	KOMP-CSD	PCS00020_A_H02	PG00020_A_2_H02 PG00020_A_3_H02 PGS00020_A_H02 PG00020_A_4_H02	L1L2_gt0	1	4
MGI:1309991	Krt33b	11	-	86	FALSE	Conditional Ready	Promotorless	EUCOMM	PCS00004_A_C06	PGS00004_A_C06 PG00004_A_4_C06	L1L2_gt0	1	2
MGI:105051	Ksr1	11	-	11	FALSE	Conditional Ready	Promotorless	EUCOMM	PCS00034_A_A05	PG00034_A_1_H06 PG00034_A_5_H06 PG00034_A_6_H07 PG00034_A_7_H04 PG00034_A_8_G11 PG00034_A_8_H04 PG00034_A_8_H06 PGS00034_A_A05 PG00034_A_5_H10 PG00034_A_7_H06	L1L2_gt0 L1L2_st0	1	10
MGI:3610315	Ksr2	5	+	45131	FALSE	Conditional Ready	Promotorless	KOMP-CSD	PCS00055_A_F01	PG00055_A_2_F01 PGS00055_A_F01 PGS00055_B_F01 PG00055_A_3_F01 PG00055_A_4_F01	L1L2_gt0	1	5
MGI:2677849	Kyat3	3	+	42003	FALSE	Conditional Ready	Promotorless	KOMP-CSD	PCS00036_A_F05	PGS00036_A_F05 PG00036_A_2_F05 PG00036_A_4_F05	L1L2_gt1	1	3
MGI:1918039	Kynu	2	+	43881	FALSE	Conditional Ready	Promotorless	KOMP-CSD	PCS00045_A_C06	PGS00045_D_C06 PG00045_B_2_C06 PG00045_D_2_C06 PG00045_A_1_C06 PG00045_B_3_C06 PG00045_A_2_C06 PG00045_D_4_C06 PG00045_B_4_C06 PGS00045_A_C06 PG00045_A_6_C06 PG00045_A_4_C06 PG00045_A_8_C06 PG00045_B_1_C06	L1L2_gt2	1	13
MGI:2676663	L3mbtl1	2	+	39837	FALSE	Conditional Ready	Promotorless	EUCOMM	PCS00019_A_B04	PG00019_A_4_B04 PGS00019_A_B04 PG00019_A_3_B04	L1L2_gt0	1	3
MGI:99915	Lamb3	1	+	43924	TRUE	Conditional Ready	Promotorless	KOMP-CSD	PCS00045_A_H07	PG00045_B_1_H07 PG00045_B_2_H07 PG00045_B_4_H07 PGS00045_A_H07 PGS00045_D_H07	L1L2_st0	1	5
MGI:1344394	Lamc3	2	+	33982	FALSE	Conditional Ready	Promotorless	KOMP-CSD	PCS00020_A_G05	PG00020_A_3_G05 PGS00020_A_G05 PG00020_A_4_G05 PG00020_A_2_G05 PG00020_A_1_G05	L1L2_st1	1	5
MGI:96748	Lamp2	X	-	43606	FALSE	Conditional Ready	Promotorless	EUCOMM	PCS00046_A_G11	PG00046_A_3_G11 PG00046_A_4_G11 PGS00046_A_G11 PG00046_A_2_G11	L1L2_st0	1	4
MGI:1919085	Lancl2	6	+	41859	FALSE	Conditional Ready	Promotorless	KOMP-CSD	PCS00031_A_D04	PG00031_B_3_D04 PGS00031_A_D04	L1L2_gt0	1	2
MGI:2443335	Lancl3	X	+	44266	FALSE	Conditional Ready	Promotorless	KOMP-CSD	PCS00049_A_C09	PG00049_A_1_C09 PG00049_A_4_C09 PGS00049_A_C09 PGS00049_B_C09 PG00049_A_3_C09 PG00049_A_2_C09	L1L2_gt0	1	6
MGI:1914238	Lap3	5	+	45859	FALSE	Conditional Ready	Promotorless	EUCOMM	PCS00060_A_E06	PG00060_A_1_E05 PG00060_A_2_E06 PGS00060_A_E06 PG00060_A_3_E06	L1L2_gt0 L1L2_gt1	1	4
MGI:108046	Laptm5	4	+	518	FALSE	Conditional Ready	Promotorless	EUCOMM	PCS00007_A_G07 PCS00017_A_G07	PG00007_B_1_G07 PG00007_B_1_G08 PG00007_B_2_G07 PG00007_B_3_G07 PG00007_B_3_G08 PG00007_B_4_G07 PG00007_B_4_G08 PG00017_B_2_G07 PG00017_B_3_G07 PG00017_B_4_G07 PGS00017_A_G07 PG00007_B_2_G08 PGS00007_A_G07	L1L2_gt0 L1L2_st0	2	13
MGI:1923380	Las1l	X	-	40517	FALSE	Conditional Ready	Promotorless	KOMP-CSD	PCS00049_A_B08	PGS00049_A_B08 PGS00049_B_B08 PG00049_A_4_B08 PG00049_A_3_B08 PG00049_A_8_B08	L1L2_gt2	1	5
MGI:1098776	Lbp	2	+	29288	FALSE	Conditional Ready	Promotorless	EUCOMM	PCS00008_A_C08	PG00008_A_1_C08 PG00008_A_2_C08 PG00008_A_4_C08 PGS00008_A_C08	L1L2_gt1	1	4
MGI:104808	Lcp1	14	+	43058	FALSE	Conditional Ready	Promotorless	KOMP-CSD	PCS00041_A_D03	PG00041_A_2_D03 PG00041_A_4_D03 PGS00041_A_D03 PG00041_A_3_D03 PG00041_A_1_D03	L1L2_gt1	1	5
MGI:2183549	Lctl	9	+	46805	FALSE	Conditional Ready	Promotorless	EUCOMM	PCS00062_A_G10	PG00062_A_1_G10 PG00062_A_2_G10 PG00062_A_4_G10 PGS00062_A_G10 PG00062_A_3_G10	L1L2_st0	1	5
MGI:96759	Ldha	7	+	42727	FALSE	Conditional Ready	Promotorless	EUCOMM	PCS00046_A_G03	PG00046_A_1_G03 PG00046_A_1_H02 PG00046_A_4_G03 PGS00046_A_G03 PG00046_A_2_G03	L1L2_gt0	1	5
MGI:96763	Ldhb	6	-	37383	TRUE	Conditional Ready	Promotorless	KOMP-CSD	PCS00021_A_D09	PG00021_A_4_D09 PG00021_C_1_D09 PG00021_C_3_D09 PG00021_C_4_D09 PGS00021_A_D09 PGS00021_B_D09	L1L2_gt0 L1L2_st0	1	6
MGI:2140175	Ldlrap1	4	-	39250	TRUE	Conditional Ready	Promotorless	EUCOMM	PCS00043_A_E09	PG00043_A_2_E09 PGS00043_A_E09	L1L2_gt1	1	2
MGI:96770	Lef1	3	+	40347	FALSE	Conditional Ready	Promotorless	EUCOMM	PCS00026_B_E05	PG00026_A_4_E05 PG00026_B_7_E05 PGS00026_A_E05 PGS00026_B_E05	L1L2_gt1	1	4
MGI:2681853	Lexm	4	-	44647	FALSE	Conditional Ready	Promotorless	KOMP-CSD	PCS00049_A_E08	PG00049_A_1_E08 PGS00049_A_E08 PGS00049_B_E08 PG00049_A_4_E08	L1L2_gt2	1	4
MGI:109496	Lgals9	11	-	12	FALSE	Conditional Ready	Promotorless	EUCOMM	PCS00004_A_A06	PG00004_A_1_B04 PG00004_A_2_A06 PG00004_A_3_A06 PG00004_A_3_B04 PG00004_A_4_A06 PG00004_A_4_B04 PGS00004_A_A06 PG00004_A_2_B04	L1L2_gt0	1	8
MGI:1923679	Lhpp	7	+	42532	FALSE	Conditional Ready	Promotorless	KOMP-CSD	PCS00036_A_C12	PG00036_A_1_C12 PGS00036_A_C12	L1L2_st2	1	2
MGI:1316721	Lhx9	1	-	41476	FALSE	Conditional Ready	Promotorless	EUCOMM	PCS00029_A_A03	PG00029_A_3_A02 PGS00029_A_A03	L1L2_gt0	1	2
MGI:1316721	Lhx9	1	-	41477	FALSE	Conditional Ready	Promotorless	EUCOMM	PCS00029_A_H10	PG00029_A_2_H10 PG00029_A_3_H10 PGS00029_A_H10	L1L2_gt1	1	3
MGI:1316721	Lhx9	1	-	41478	FALSE	Conditional Ready	Promotorless	EUCOMM	PCS00030_B_C08	PG00030_B_3_C08 PG00030_B_4_C08 PG00030_C_4_C08 PGS00030_B_C08 PGS00030_C_C08	L1L2_gt2	1	5
MGI:1924819	Limch1	5	+	46051	FALSE	Conditional Ready	Promotorless	EUCOMM	PCS00062_A_C03	PG00062_A_1_C03 PG00062_A_2_C03 PG00062_A_3_C03 PG00062_A_4_C03 PGS00062_A_C03	L1L2_gt1	1	5
MGI:1197517	Limk2	11	-	35	FALSE	Conditional Ready	Promotorless	EUCOMM	PCS00006_A_A10	PG00006_A_1_A10 PG00006_A_3_A10 PG00006_A_4_A10 PGS00006_A_A10	L1L2_gt2	1	4
MGI:102682	Llgl1	11	+	428	FALSE	Conditional Ready	Promotorless	EUCOMM	PCS00007_A_A05	PGS00007_A_A05	L1L2_gt0	1	1
MGI:1289247	Lmbr1l	15	-	42587	FALSE	Conditional Ready	Promotorless	EUCOMM	PCS00038_A_H10	PG00038_A_1_H10 PG00038_A_2_H10 PGS00038_A_H10	L1L2_gt1	1	3
MGI:1353635	Lmcd1	6	+	40401	FALSE	Conditional Ready	Promotorless	EUCOMM	PCS00030_B_H12	PG00030_C_4_H12 PGS00030_C_H12	L1L2_gt2	1	2
MGI:96795	Lmnb1	18	+	39066	FALSE	Conditional Ready	Promotorless	EUCOMM	PCS00046_A_E07	PG00046_A_1_E07 PG00046_A_2_E07 PG00046_A_3_E07 PG00046_A_4_E07 PGS00046_A_E07	L1L2_gt2	1	5
MGI:96796	Lmnb2	10	-	82511	FALSE	Conditional Ready	Promotorless	KOMP-CSD	PCP10002_A_C07 PCP10002_A_C05 PCP10002_A_C11 PCP10002_A_C12 PCP10002_A_C06 PCP10002_A_C10 PCP10002_A_C08 PCP10002_A_C09	PFA0002_A_1_C07 PFA0002_A_4_C05 PFA0002_A_4_C11 PFA0002_A_4_C12 PFA0002_A_1_C06 PFA0002_A_1_C10 PFA0002_A_2_C06 PFA0002_A_2_C07 PFA0002_A_2_C10 PFA0002_A_3_C06 PFA0002_A_3_C10 PFA0002_A_4_C06 PFA0002_A_4_C07 PFA0002_A_4_C08 PFA0002_A_4_C09 PFA0002_A_4_C10 PFA0002_A_7_C10 PFA0002_A_7_C11 PFA0002_A_8_C08 PFA0002_A_8_C11 PFA0002_A_6_C08 PFA0002_A_8_C07 PFA0002_A_1_C09	L1L2_gt0	8	23
MGI:1921321	Lmntd1	6	-	41683	TRUE	Conditional Ready	Promotorless	KOMP-CSD	PCS00031_A_E05	PG00031_B_2_E05 PG00031_B_3_E05 PG00031_B_4_E06 PGS00031_A_E05 PG00031_A_15_E05 PG00031_A_14_E05 PG00031_B_4_E05	L1L2_gt1	1	7
MGI:1888519	Lmx1a	1	+	40056	FALSE	Conditional Ready	Promotorless	EUCOMM	PCS00029_A_G09	PG00029_A_2_G09 PG00029_A_3_G09 PG00029_A_4_G09 PGS00029_A_G09	L1L2_gt1	1	4
MGI:1918115	Lnpk	2	-	27443	FALSE	Conditional Ready	Promotorless	EUCOMM	PCS00008_A_H06	PG00008_A_3_H06 PG00008_A_4_H06 PGS00008_A_H06 PG00008_A_2_H06	L1L2_gt0	1	4
MGI:1920209	Lonrf2	1	-	44982	FALSE	Conditional Ready	Promotorless	KOMP-CSD	PCS00052_A_G02	PG00052_A_3_G02 PG00052_A_7_G02 PG00052_A_2_G02 PG00052_A_6_G02 PG00052_A_5_G02 PGS00052_A_G02 PG00052_A_8_G02	L1L2_gt0	1	7
MGI:1921615	Lonrf3	X	+	41056	FALSE	Conditional Ready	Promotorless	KOMP-CSD	PCS00049_A_A01	PG00049_A_4_A01 PGS00049_B_A01 PGS00049_A_A01 PG00049_A_6_A01 PG00049_A_7_A01	L1L2_gt0	1	5
MGI:1891341	Lpin2	17	+	43131	FALSE	Conditional Ready	Promotorless	KOMP-CSD	PCS00045_A_D01	PG00045_B_3_D01 PG00045_A_1_D01 PG00045_D_4_D01 PGS00045_A_D01 PG00045_A_3_D01 PG00045_A_8_D01 PG00045_B_4_D01 PG00045_D_1_D01 PGS00045_D_D01 PG00045_A_5_D01 PG00045_B_1_D01 PG00045_A_4_D01 PG00045_B_2_D01	L1L2_gt0	1	13
MGI:1891342	Lpin3	2	+	41420	TRUE	Conditional Ready	Promotorless	KOMP-CSD	PCS00028_A_C06	PG00028_B_1_C06 PG00028_B_4_C06 PGS00028_A_C06 PG00028_B_3_C06	L1L2_gt0	1	4
MGI:1923363	Lpo	11	-	66	FALSE	Conditional Ready	Promotorless	EUCOMM	PCS00005_A_B04 PCS00035_A_B04	PG00005_A_1_B04 PG00005_A_2_B04 PG00005_A_3_B04 PG00005_A_4_B04 PG00035_A_2_E02 PG00035_A_3_B04 PG00035_A_4_B04 PG00035_A_4_E02 PGS00035_A_B04 PGS00005_A_B04	L1L2_gt1 L1L2_st1	2	10
MGI:107935	Lrig1	6	-	42916	FALSE	Conditional Ready	Promotorless	EUCOMM	MOHPC10006_A_C11 PCS00046_A_F12	MOHFA0006_B_6_C11 MOHFAS5006_Z_C06 PG00046_A_2_F12 PG00046_A_3_F12 PG00046_A_4_F12 PG00046_A_1_F12 PGS00046_A_F12	L1L2_gt2_Del_LacZ L1L2_st2	2	7
MGI:2443132	Lrp12	15	-	42509	FALSE	Conditional Ready	Promotorless	KOMP-CSD	PCS00036_A_E09	PG00036_A_4_E09 PG00036_A_1_E09 PG00036_A_2_E09 PG00036_A_3_E09 PGS00036_A_E09	L1L2_st2	1	5
MGI:1914870	Lrp2bp	8	+	41927	FALSE	Conditional Ready	Promotorless	KOMP-CSD	PCS00031_A_G09	PGS00031_A_G09 PG00031_A_3_G09	L1L2_gt1	1	2
MGI:1298218	Lrp6	6	-	40393	FALSE	Conditional Ready	Promotorless	EUCOMM	PCS00030_B_F09	PG00030_B_1_F09 PG00030_B_4_F09 PGS00030_B_F09	L1L2_gt2	1	3
MGI:2140219	Lrrc19	4	-	36365	FALSE	Conditional Ready	Promotorless	KOMP-CSD	PCS00021_A_G04	PG00021_A_1_G04 PG00021_A_1_G03 PGS00021_B_G04 PG00021_B_4_G03 PGS00021_A_G04	L1L2_gt0 L1L2_st0	1	5
MGI:1919077	Lrrc34	3	-	41388	FALSE	Conditional Ready	Promotorless	EUCOMM	PCS00030_B_E01	PG00030_C_1_E01 PG00030_C_2_E01 PG00030_C_3_E01 PG00030_C_4_E01 PGS00030_C_E01	L1L2_gt2	1	5
MGI:1924557	Lrrc39	3	+	41892	FALSE	Conditional Ready	Promotorless	KOMP-CSD	PCS00031_A_C06	PGS00031_A_C06 PG00031_A_13_C06 PG00031_B_1_C06 PG00031_B_3_C05	L1L2_gt1	1	4
MGI:2441984	Lrrc41	4	+	39148	FALSE	Conditional Ready	Promotorless	EUCOMM	PCS00042_A_H10	PG00042_A_2_G10 PGS00042_A_H10	L1L2_gt0	1	2
MGI:1916547	Lrrc46	11	-	74	TRUE	Conditional Ready	Promotorless	EUCOMM	PCS00016_A_B08	PG00016_B_2_B08 PG00016_B_3_B08 PG00016_B_4_B08 PGS00016_A_B08	L1L2_gt2	1	4
MGI:1921915	Lrrc48	11	+	290	FALSE	Conditional Ready	Promotorless	EUCOMM	PCS00005_A_F09	PG00005_A_1_F09 PG00005_A_4_F09 PGS00005_A_F09	L1L2_gt1	1	3
MGI:1917802	Lrrc56	7	+	42331	FALSE	Conditional Ready	Promotorless	KOMP-CSD	PCS00036_A_D03	PGS00036_A_D03 PG00036_A_3_D03 PG00036_A_4_D03 PG00036_A_2_D03 PG00036_A_1_D03	L1L2_gt0	1	5
MGI:2387634	Lrrc66	5	-	45079	FALSE	Conditional Ready	Promotorless	KOMP-CSD	PCS00055_A_C11	PG00055_A_4_C11 PG00055_A_3_C11 PG00055_A_6_C11 PGS00055_A_C11 PG00055_A_2_C11 PGS00055_B_C11 PG00055_A_1_C11	L1L2_st1	1	7
MGI:1920564	Lrrc69	4	-	177	FALSE	Conditional Ready	Promotorless	EUCOMM	PCS00004_A_E06	PG00004_A_2_E06 PG00004_A_4_E06 PGS00004_A_E06	L1L2_gt0	1	3
MGI:2142227	Lrrk1	7	-	43355	FALSE	Conditional Ready	Promotorless	KOMP-CSD	PCS00045_A_D02	PGS00045_A_D02 PG00045_B_4_D02 PG00045_D_4_D02 PG00045_B_2_D02 PG00045_D_3_D02 PG00045_A_8_D02 PGS00045_D_D02 PG00045_B_1_D02	L1L2_gt0	1	8
MGI:2141485	Lrtm2	6	-	43646	FALSE	Conditional Ready	Promotorless	EUCOMM	PCS00047_A_G12	PG00047_A_1_G12 PG00047_A_2_G12 PG00047_A_3_G12 PGS00047_A_G12	L1L2_st0	1	4
MGI:1918985	Lrwd1	5	-	43901	FALSE	Conditional Ready	Promotorless	EUCOMM	PCS00050_A_A07	PG00050_A_3_A07 PG00050_A_4_A07 PG00050_A_5_A07 PGS00050_A_A07 PG00050_A_6_A07	L1L2_gt0	1	5
MGI:1919540	Lsm11	11	-	43698	FALSE	Conditional Ready	Promotorless	KOMP-CSD	PCS00045_A_H04	PG00045_A_5_H03 PG00045_D_1_H03 PGS00045_D_H04 PGS00045_A_H04 PG00045_A_4_H04	L1L2_gt1	1	5
MGI:1914320	Lsm14a	7	-	37394	FALSE	Conditional Ready	Promotorless	KOMP-CSD	PCS00021_A_C06	PG00021_C_3_C06 PGS00021_B_C06 PG00021_B_2_C05 PG00021_B_3_C05 PGS00021_A_C06 PG00021_B_4_C05	L1L2_st0 L1L2_gt0	1	6
MGI:3040677	Lsm14b	2	+	41432	FALSE	Conditional Ready	Promotorless	KOMP-CSD	PCS00031_A_B10	PGS00031_A_B10 PG00031_B_4_B10	L1L2_gt1	1	2
MGI:96832	Lsp1	7	+	42838	FALSE	Conditional Ready	Promotorless	EUCOMM	PCS00054_B_E01	PG00054_A_1_E01 PG00054_A_1_E06 PG00054_A_2_E01 PG00054_A_2_E06 PG00054_A_3_E01 PG00054_A_4_E01 PGS00054_A_E01	L1L2_gt2	1	7
MGI:1916694	Lyzl6	11	-	41496	TRUE	Conditional Ready	Promotorless	KOMP-CSD	PCS00028_A_B02	PG00028_B_4_B02 PGS00028_A_B02 PG00028_B_2_C02	L1L2_st0 L1L2_gt0	1	3
MGI:96904	M6pr	6	+	42403	FALSE	Conditional Ready	Promotorless	EUCOMM	PCS00038_A_G12	PG00038_A_1_G12 PG00038_A_2_G12 PG00038_A_3_G12 PGS00038_A_G12 PG00038_A_4_G12	L1L2_st2	1	5
MGI:2446273	Mab21l3	3	-	44985	TRUE	Conditional Ready	Promotorless	KOMP-CSD	PCS00052_A_H02	PG00052_A_1_H02 PG00052_A_3_H02 PG00052_A_5_H02 PG00052_A_8_H02 PGS00052_A_H02 PG00052_A_4_H02 PG00052_A_6_H02 PG00052_A_7_H02	L1L2_gt0	1	8
MGI:1919140	Mad2l2	4	+	610	FALSE	Conditional Ready	Promotorless	EUCOMM	PCS00007_A_G09 PCS00017_A_G09	PG00007_B_2_G09 PG00007_B_3_G09 PG00007_B_4_G09 PGS00007_A_G09 PG00017_B_1_H07 PGS00017_A_G09	L1L2_gt0	2	6
MGI:2138453	Mael	1	-	45206	FALSE	Conditional Ready	Promotorless	KOMP-CSD	PCS00055_A_G03	PGS00055_B_G03 PG00055_A_7_G03 PG00055_A_1_G03 PGS00055_A_G03 PG00055_A_2_G03	L1L2_gt1	1	5
MGI:99951	Mafk	5	+	43700	FALSE	Conditional Ready	Promotorless	EUCOMM	PCS00050_A_G06	PG00050_A_3_G06 PG00050_A_4_G06 PG00050_A_5_G06 PG00050_A_7_G06 PG00050_A_8_G06 PGS00050_A_G06	L1L2_gt0	1	6
MGI:1930187	Maged1	X	-	86286	FALSE	Conditional Ready	Promotorless	KOMP-CSD	MOHPC10006_A_D01 MOHPC10006_A_C12	MOHFA0006_B_2_D01 MOHFA0006_B_3_D01 MOHFA0006_B_5_D01 MOHFA0006_B_6_C12 MOHFA0006_B_6_D01 MOHFA0006_B_7_C12 MOHFAS5006_Z_C08 MOHFA0006_B_3_C12 MOHFAS5006_Z_C07 MOHFA0006_B_1_D01 MOHFA0006_B_8_D01	L1L2_gt0_Del_LacZ	2	11
MGI:1354953	Magi2	5	+	47383	FALSE	Conditional Ready	Promotorless	EUCOMM	PCS00063_A_C07	PG00063_B_4_C07 PGS00063_A_C07 PG00063_B_2_C07	L1L2_gt1	1	3
MGI:1859644	Magix	X	-	40674	FALSE	Conditional Ready	Promotorless	EUCOMM	PCS00033_A_E09	PG00033_A_4_E09 PGS00033_A_E09	L1L2_gt1	1	2
MGI:1922843	Malsu1	6	+	43487	FALSE	Conditional Ready	Promotorless	EUCOMM	PCS00047_A_C05	PG00047_A_1_C05 PG00047_A_2_C05 PGS00047_A_C05	L1L2_gt0	1	3
MGI:104677	Man1a	10	-	42948	FALSE	Conditional Ready	Promotorless	KOMP-CSD	PCS00041_A_A07	PGS00041_A_A07 PG00041_A_3_A07	L1L2_gt1	1	2
MGI:104676	Man1a2	3	-	33849	TRUE	Conditional Ready	Promotorless	EUCOMM	PCS00042_A_A07	PG00042_A_2_A07 PG00042_A_3_A07 PG00042_A_4_A07 PGS00042_A_A07	L1L2_gt0	1	4
MGI:2684954	Man1b1	2	+	33640	FALSE	Conditional Ready	Promotorless	EUCOMM	PCS00044_A_F06	PG00044_A_5_F06 PG00044_A_6_F06 PG00044_A_7_F06 PG00044_A_8_F06 PGS00044_A_F06	L1L2_gt1	1	5
MGI:2446214	Man1c1	4	-	36889	FALSE	Conditional Ready	Promotorless	KOMP-CSD	PCS00020_A_D10	PG00020_A_2_D10 PG00020_A_4_D10 PGS00020_A_D10	L1L2_st1	1	3
MGI:2444484	Manea	4	-	47194	FALSE	Conditional Ready	Promotorless	EUCOMM	PCS00064_A_E12	PG00064_A_1_E12 PG00064_A_3_E12 PGS00064_A_E12 PG00064_A_2_E12	L1L2_st1	1	4
MGI:2684896	Maneal	4	-	36741	FALSE	Conditional Ready	Promotorless	KOMP-CSD	PCS00020_A_C09	PG00020_A_4_E10 PGS00020_A_C09 PG00020_A_2_A11 PG00020_A_1_A11 PG00020_A_4_C09 PG00020_A_2_C09	L1L2_gt1 L1L2_st1	1	6
MGI:96915	Maoa	X	+	41064	FALSE	Conditional Ready	Promotorless	KOMP-CSD	PCS00027_A_E02	PG00027_B_1_D03 PG00027_B_1_E02 PG00027_B_2_D03 PG00027_B_4_E02 PGS00027_A_E02 PG00027_B_3_E02	L1L2_gt0	1	6
MGI:1346871	Map2k7	8	+	42422	FALSE	Conditional Ready	Promotorless	EUCOMM	PCS00037_A_E04	PG00037_A_3_E04 PGS00037_A_E04	L1L2_gt0	1	2
MGI:1858204	Map3k14	11	-	33704	FALSE	Conditional Ready	Promotorless	EUCOMM	PCS00040_A_B07	PG00040_A_1_A07 PG00040_A_3_A07 PG00040_A_3_B07 PGS00040_A_B07	L1L2_gt1	1	4
MGI:1346874	Map3k3	11	+	118	FALSE	Conditional Ready	Promotorless	EUCOMM	PCS00005_A_C07	PG00005_A_1_C07 PG00005_A_2_C07 PG00005_A_3_C07 PGS00005_A_C07	L1L2_gt1	1	4
MGI:1346877	Map3k7	4	+	33755	FALSE	Conditional Ready	Promotorless	EUCOMM	PCS00040_A_E04	PG00040_A_2_E04 PG00040_A_3_E04 PGS00040_A_E04	L1L2_gt0	1	3
MGI:2384297	Map7d1	4	-	46870	FALSE	Conditional Ready	Promotorless	EUCOMM	PCS00062_A_G11	PG00062_A_2_G11 PGS00062_A_G11	L1L2_gt1	1	2
MGI:1346858	Mapk1	16	+	42428	FALSE	Conditional Ready	Promotorless	EUCOMM	PCS00037_A_A10	PG00037_A_2_A10 PG00037_A_3_A10 PGS00037_A_A10	L1L2_gt2	1	3
MGI:1346863	Mapk10	5	-	44146	FALSE	Conditional Ready	Promotorless	EUCOMM	PCS00046_A_E09	PG00046_A_1_E09 PG00046_A_2_E09 PG00046_A_3_E09 PG00046_A_4_E09 PGS00046_A_E09	L1L2_gt2	1	5
MGI:1346865	Mapk14	17	+	41789	FALSE	Conditional Ready	Promotorless	EUCOMM	PCS00032_A_F08	PG00032_A_2_F08 PG00032_A_3_F08 PGS00032_A_F08 PG00032_A_4_F08	L1L2_gt2	1	4
MGI:1346862	Mapk9	11	+	257	FALSE	Conditional Ready	Promotorless	EUCOMM	PCS00006_A_D12 PCS00016_A_D12	PG00006_A_1_D05 PG00006_A_3_D05 PGS00006_A_D05 PG00016_B_4_D12 PGS00016_A_D12 PG00016_B_1_D12	L1L2_gt2	2	6
MGI:1333110	Mapkapk5	5	-	42179	FALSE	Conditional Ready	Promotorless	EUCOMM	PCS00038_A_D01	PG00038_A_1_D01 PG00038_A_2_D01 PGS00038_A_D01	L1L2_gt0	1	3
MGI:1347004	Mapkbp1	2	+	28155	FALSE	Conditional Ready	Promotorless	EUCOMM	PCS00008_A_H04	PG00008_A_2_H04 PG00008_A_3_H04 PG00008_A_4_H04 PGS00008_A_H04 PG00008_A_1_H04	L1L2_gt0	1	5
MGI:1920175	March1	8	+	33627	FALSE	Conditional Ready	Promotorless	EUCOMM	PCS00008_A_H12	PG00008_A_3_H12 PG00008_A_4_H12 PGS00008_A_H12 PG00008_A_2_H12	L1L2_gt2	1	4
MGI:2443667	March3	18	-	33630	TRUE	Conditional Ready	Promotorless	EUCOMM	PCS00008_A_G12	PG00008_A_2_G12 PG00008_A_3_G12 PGS00008_A_G12	L1L2_gt2	1	3
MGI:1915207	March5	19	+	39939	FALSE	Conditional Ready	Promotorless	EUCOMM	PCS00030_B_A03	PG00030_C_1_A03 PG00030_C_2_A03 PG00030_C_3_A03 PG00030_C_4_A03 PGS00030_C_A03	L1L2_gt1	1	5
MGI:1931053	March7	2	+	33628	FALSE	Conditional Ready	Promotorless	EUCOMM	PCS00008_A_C11	PG00008_A_2_C11 PGS00008_A_C11	L1L2_gt1	1	2
MGI:1919029	March8	6	+	33629	TRUE	Conditional Ready	Promotorless	EUCOMM	PCS00008_A_F12	PG00008_A_3_F12 PG00008_A_4_F12 PGS00008_A_F12	L1L2_gt2	1	3
MGI:1919029	March8	6	+	40908	FALSE	Conditional Ready	Promotorless	EUCOMM	PCS00046_A_H09	PG00046_A_1_H09 PG00046_A_2_H09 PG00046_A_4_H09 PGS00046_A_H09	L1L2_gt0	1	4
MGI:1333812	Mbd3	10	-	46733	FALSE	Conditional Ready	Promotorless	EUCOMM	MOHPC10006_A_D02	MOHFA0006_B_1_D02 MOHFA0006_B_2_D02 MOHFA0006_B_3_D02 MOHFA0006_B_5_D02 MOHFA0006_B_6_D02 MOHFA0006_B_7_D02	L1L2_gt2_Del_LacZ	1	6
MGI:1333812	Mbd3	10	-	364147	FALSE	Conditional Ready	Promotorless	EUCOMM	MOHPC10006_A_D03	MOHFA0006_A_3_D03 MOHFA0006_A_4_D03 MOHFA0006_A_5_D03 MOHFA0006_B_1_D03 MOHFA0006_B_2_D03 MOHFAS5006_Z_C09 MOHFAS5006_Z_C10	L1L2_gt0_Del_LacZ	1	7
MGI:2138934	Mbd5	2	+	39838	FALSE	Conditional Ready	Promotorless	EUCOMM	PCS00019_A_C12	PG00019_A_1_C12 PG00019_A_2_C12 PG00019_A_3_C12 PG00019_A_4_C12 PGS00019_A_C12	L1L2_gt2	1	5
MGI:2387184	Mboat1	13	+	31	FALSE	Conditional Ready	Promotorless	EUCOMM	PCS00006_A_A08 PCS00016_A_A08	PG00006_A_1_A08 PG00006_A_2_A08 PG00006_A_4_A08 PGS00006_A_A08 PG00016_B_1_A08 PG00016_B_2_A08 PG00016_B_4_A08 PGS00016_A_A08	L1L2_gt2	2	8
MGI:2143977	Mbtd1	11	+	41585	FALSE	Conditional Ready	Promotorless	EUCOMM	PCS00030_B_F02	PG00030_C_1_F02 PG00030_C_2_F02 PGS00030_C_F02	L1L2_gt0	1	3
MGI:96932	Mcf2	X	-	40226	FALSE	Conditional Ready	Promotorless	EUCOMM	PCS00029_A_E01	PG00029_A_1_E02 PGS00029_A_E01	L1L2_gt0	1	2
MGI:105380	Mcm2	6	-	295427	FALSE	Conditional Ready	Promotorless	EUCOMM	MOHPC10006_A_D04	MOHFA0006_B_5_D04 MOHFA0006_B_6_D04 MOHFAS5006_Z_C11 MOHFAS5006_Z_C12	L1L2_gt2_Del_LacZ	1	4
MGI:1913884	Mcm8	2	+	28712	FALSE	Conditional Ready	Promotorless	EUCOMM	PCS00008_A_C06	PG00008_A_1_C06 PG00008_A_2_C06 PGS00008_A_C06	L1L2_gt0	1	3
MGI:2443308	Mcph1	8	+	40928	TRUE	Conditional Ready	Promotorless	EUCOMM	PCS00026_B_E12	PG00026_B_6_E12 PGS00026_B_E12	L1L2_gt2	1	2
MGI:1858420	Mcrs1	15	-	299516	FALSE	Conditional Ready	Promotorless	EUCOMM	MOHPC10006_A_D05	MOHFA0006_B_1_D05 MOHFA0006_B_5_D05 MOHFAS5006_Z_D02 MOHFAS5006_Z_D01	L1L2_gt2_Del_LacZ	1	4
MGI:97051	Mdh1	11	-	228	FALSE	Conditional Ready	Promotorless	EUCOMM	PCS00004_A_F03 PCS00034_A_F03	PG00004_A_2_F03 PG00004_A_3_F03 PGS00004_A_F03 PG00034_A_1_C09 PG00034_A_4_C10 PG00034_A_5_C10 PG00034_A_7_C09 PG00034_A_8_C10 PGS00034_A_F03 PG00004_A_4_F03	L1L2_gt0	2	10
MGI:96952	Mdm2	10	-	40198	FALSE	Conditional Ready	Promotorless	EUCOMM	PCS00029_A_G10	PG00029_A_1_G10 PG00029_A_2_G10 PG00029_A_3_G10 PG00029_A_4_G10 PGS00029_A_G10	L1L2_gt1	1	5
MGI:1926159	Mdn1	4	+	35928	TRUE	Conditional Ready	Promotorless	KOMP-CSD	PCS00023_E_D02	PG00023_E_2_D02 PG00023_E_1_D02 PG00023_E_4_D02 PG00023_D_1_D02 PG00023_D_2_D02 PGS00023_E_D02 PGS00023_A_D02 PG00023_E_3_D02	L1L2_gt0	1	8
MGI:1916679	Me3	7	+	44374	FALSE	Conditional Ready	Promotorless	KOMP-CSD	PCS00049_A_G06	PG00049_A_6_G06 PGS00049_B_G06 PGS00049_A_G06 PG00049_A_5_G06	L1L2_gt2	1	4
MGI:1349441	Mecr	4	+	516	FALSE	Conditional Ready	Promotorless	EUCOMM	PCS00006_A_G11 PCS00016_A_G11	PG00006_A_1_F09 PG00006_A_1_G11 PG00006_A_2_F09 PGS00006_A_F09 PGS00006_A_G11 PG00016_B_1_G11 PG00016_B_2_G11 PG00016_B_3_G11 PG00016_B_4_G11 PGS00016_A_G11 PG00006_A_4_G11	L1L2_gt2	2	11
MGI:1926212	Med12	X	+	40766	FALSE	Conditional Ready	Promotorless	EUCOMM	PCS00032_A_A04	PG00032_A_1_A04 PG00032_A_2_A04 PGS00032_A_A04	L1L2_st0	1	3
MGI:1914469	Med18	4	-	46343	FALSE	Conditional Ready	Promotorless	EUCOMM	PCS00062_A_B04	PG00062_A_1_B04 PG00062_A_3_B04 PG00062_A_4_B04 PGS00062_A_B04	L1L2_gt1	1	4
MGI:1344385	Med24	11	-	43792	FALSE	Conditional Ready	Promotorless	EUCOMM	PCS00050_A_D03	PG00050_A_1_D03 PG00050_A_2_D03 PG00050_A_3_D03 PG00050_A_4_D03 PGS00050_A_D03	L1L2_gt0	1	5
MGI:1917967	Medag	5	+	45160	TRUE	Conditional Ready	Promotorless	KOMP-CSD	PCS00055_A_E05	PGS00055_A_E05 PG00055_A_1_E05 PG00055_A_3_E05 PGS00055_B_E05 PG00055_A_4_E05 PG00055_A_8_E05 PG00055_A_5_E05	L1L2_gt2	1	7
MGI:2685177	Megf10	18	+	42779	FALSE	Conditional Ready	Promotorless	KOMP-CSD	PCS00041_A_G12	PGS00041_A_G12 PG00041_A_3_G12	L1L2_st2	1	2
MGI:2686410	Meioc	11	+	44168	FALSE	Conditional Ready	Promotorless	KOMP-CSD	PCS00048_A_E03	PG00048_A_2_E03 PG00048_A_3_E03 PGS00048_A_E03 PG00048_A_4_E03	L1L2_gt0	1	4
MGI:106924	Melk	4	+	36022	FALSE	Conditional Ready	Promotorless	KOMP-CSD	PCS00023_E_B11	PGS00023_E_B11 PGS00023_A_B11 PG00023_E_1_B11 PG00023_C_2_B11	L1L2_gt1	1	4
MGI:1316736	Men1	19	+	199148	FALSE	Conditional Ready	Promotorless	KOMP-CSD	MOHPC10006_A_D07 MOHPC10006_A_D06	MOHFA0006_B_2_D07 MOHFA0006_B_3_D06 MOHFA0006_B_4_D06 MOHFA0006_B_5_D06 MOHFA0006_B_8_D06 MOHFA0006_B_8_D07 MOHFAS5006_Z_D03 MOHFAS5006_Z_D04 MOHFA0006_B_3_D07 MOHFA0006_B_4_D07 MOHFA0006_B_6_D07	L1L2_gt1_Del_LacZ	2	11
MGI:2384806	Metrnl	11	+	41289	FALSE	Conditional Ready	Promotorless	KOMP-CSD	PCS00028_A_F03	PG00028_B_3_F03 PG00028_B_2_F03 PG00028_B_4_F03 PGS00028_A_F03	L1L2_st0	1	4
MGI:1918699	Mettl13	1	-	41655	FALSE	Conditional Ready	Promotorless	KOMP-CSD	PCS00031_A_A09	PG00031_B_4_A09 PG00031_A_16_A09 PG00031_B_2_A09 PG00031_A_14_A09 PG00031_B_3_A09 PGS00031_A_A09 PG00031_A_15_A09	L1L2_gt0	1	7
MGI:1924144	Mettl15	2	-	39413	FALSE	Conditional Ready	Promotorless	EUCOMM	PCS00042_A_C07	PG00042_A_2_C07 PGS00042_A_C07	L1L2_gt0	1	2
MGI:1289171	Mettl2	11	+	33697	TRUE	Conditional Ready	Promotorless	EUCOMM	PCS00040_A_H06	PG00040_A_1_H07 PG00040_A_2_H07 PG00040_A_3_H07 PG00040_A_4_H07 PGS00040_A_H06	L1L2_gt1	1	5
MGI:1914349	Mettl21a	1	-	45009	TRUE	Conditional Ready	Promotorless	KOMP-CSD	PCS00052_A_F03	PGS00052_A_F03 PG00052_A_6_F03	L1L2_gt0	1	2
MGI:1095404	Mfng	15	-	40124	FALSE	Conditional Ready	Promotorless	EUCOMM	PCS00029_A_F10	PG00029_A_2_F10 PGS00029_A_F10	L1L2_st0	1	2
MGI:1923824	Mfsd2a	4	-	36696	FALSE	Conditional Ready	Promotorless	KOMP-CSD	PCS00021_A_E06	PG00021_B_1_E06 PGS00021_B_E06 PG00021_B_3_E06 PG00021_C_2_D07 PG00021_C_4_D07 PG00021_B_1_D07 PG00021_B_2_E06 PG00021_C_1_D07 PG00021_C_3_E06 PGS00021_A_E06 PG00021_C_2_E06	L1L2_st0 L1L2_gt0	1	11
MGI:1919425	Mfsd8	3	-	45701	FALSE	Conditional Ready	Promotorless	EUCOMM	PCS00062_A_H01	PG00062_A_1_H01 PG00062_A_4_H01 PGS00062_A_H01 PG00062_A_2_H01	L1L2_gt2	1	4
MGI:1914999	Mgarp	3	-	41222	TRUE	Conditional Ready	Promotorless	EUCOMM	PCS00030_B_G01	PG00030_C_1_G01 PG00030_C_2_G01 PG00030_C_3_G01 PGS00030_C_G01	L1L2_gt1	1	4
MGI:1913697	Mgst3	1	-	41685	FALSE	Conditional Ready	Promotorless	KOMP-CSD	PCS00031_A_D12	PG00031_B_4_D12 PG00031_A_4_D12 PG00031_A_2_E11 PGS00031_A_D12 PG00031_A_2_E12 PG00031_A_4_E12 PG00031_A_2_D12	L1L2_st2 L1L2_gt1 L1L2_gt2	1	7
MGI:2443157	Mib1	18	+	46455	FALSE	Conditional Ready	Promotorless	EUCOMM	PCS00062_A_G05	PG00062_A_1_F05 PG00062_A_1_G05 PG00062_A_1_H06 PG00062_A_2_G05 PG00062_A_3_G05 PG00062_A_4_G05 PG00062_A_3_F05 PG00062_A_1_G06 PGS00062_A_G05	L1L2_gt0 L1L2_gt1 L1L2_st0	1	9
MGI:2679684	Mib2	4	-	44581	FALSE	Conditional Ready	Promotorless	EUCOMM	PCS00050_A_B09	PG00050_A_1_B09 PG00050_A_4_B09 PG00050_A_5_B09 PG00050_A_6_B09 PG00050_A_7_B09 PG00050_A_8_B09 PGS00050_A_B09 PG00050_A_3_B09 PG00050_A_2_B09	L1L2_gt2	1	9
MGI:2444947	Mical2	7	+	42371	FALSE	Conditional Ready	Promotorless	KOMP-CSD	PCS00036_A_B03	PG00036_A_3_B03 PG00036_A_2_B03 PG00036_A_1_B03 PGS00036_A_B03 PG00036_A_3_B04 PG00036_A_4_B03	L1L2_gt0	1	6
MGI:1918398	Mier1	4	+	39842	FALSE	Conditional Ready	Promotorless	EUCOMM	PCS00019_A_B08	PG00019_A_1_B08 PG00019_A_2_B08 PG00019_A_3_B08 PG00019_A_4_B08 PGS00019_A_B08	L1L2_st1	1	5
MGI:1922035	Miga2	2	+	34212	FALSE	Conditional Ready	Promotorless	KOMP-CSD	PCS00020_A_E03 PCP10002_A_B06	PG00020_A_2_E03 PG00020_A_4_E03 PGS00020_A_E03 PG00020_A_3_E03 PFA0002_A_2_B06 PFA0002_A_3_B06 PFA0002_A_8_B06 PG00020_A_1_E03 PFA0002_A_1_B06 PFA0002_A_6_B06 PFA0002_A_7_B06	L1L2_gt0	2	11
MGI:2685731	Milr1	11	+	33716	FALSE	Conditional Ready	Promotorless	EUCOMM	PCS00040_A_E07	PG00040_A_2_E07 PGS00040_A_E07	L1L2_st1	1	2
MGI:2182066	Mios	6	+	43637	FALSE	Conditional Ready	Promotorless	EUCOMM	PCS00051_A_C10	PG00051_A_1_F03 PG00051_A_2_F03 PG00051_A_3_F03 PG00051_A_4_C10 PG00051_A_4_F03 PGS00051_A_C10	L1L2_gt1	1	6
MGI:2145099	Mis18bp1	12	-	39790	FALSE	Conditional Ready	Promotorless	EUCOMM	PCS00030_B_D02	PG00030_B_4_D02 PG00030_C_1_D02 PG00030_C_1_E02 PG00030_C_2_D02 PG00030_C_2_E02 PG00030_C_3_D02 PG00030_C_3_E02 PG00030_C_4_D02 PG00030_C_4_E02 PGS00030_B_D02 PGS00030_C_D02	L1L2_gt0	1	11
MGI:104554	Mitf	6	+	41916	FALSE	Conditional Ready	Promotorless	KOMP-CSD	PCS00031_A_F01	PGS00031_A_F01 PG00031_B_4_F01	L1L2_gt0	1	2
MGI:1351638	Mkln1	6	+	43777	FALSE	Conditional Ready	Promotorless	EUCOMM	PCS00046_A_G02	PG00046_A_1_G02 PG00046_A_3_G02 PG00046_A_4_G02 PGS00046_A_G02	L1L2_gt0	1	4
MGI:894316	Mknk1	4	+	471	FALSE	Conditional Ready	Promotorless	EUCOMM	PCS00007_A_C11 PCS00017_A_C11	PGS00007_A_C11 PG00017_B_4_C11 PGS00017_A_C11 PG00017_B_1_C11	L1L2_gt1	2	4
MGI:2176380	Mlph	1	+	41603	FALSE	Conditional Ready	Promotorless	KOMP-CSD	PCS00031_A_A06	PGS00031_A_A06 PG00031_B_2_A06 PG00031_B_4_A06 PG00031_A_3_A06 PG00031_B_1_A06 PG00031_A_4_A06 PG00031_A_1_A06 PG00031_A_13_A06 PG00031_A_14_A06	L1L2_gt1	1	9
MGI:1923786	Mmadhc	2	-	34362	FALSE	Conditional Ready	Promotorless	KOMP-CSD	PCS00020_A_B10	PG00020_A_3_B10 PGS00020_A_B10 PG00020_A_4_B10 PG00020_A_2_B10 PG00020_A_2_B08 PG00020_A_1_B10	L1L2_gt1	1	6
MGI:1914718	Mmd	11	+	44219	FALSE	Conditional Ready	Promotorless	KOMP-CSD	PCS00049_A_H10	PG00049_A_1_H10 PGS00049_B_H10 PG00049_A_4_H10 PGS00049_A_H10	L1L2_gt2	1	4
MGI:2384305	Mmgt1	X	-	40741	FALSE	Conditional Ready	Promotorless	EUCOMM	PCS00033_A_B05	PG00033_A_1_B05 PG00033_A_3_B05 PGS00033_A_B05 PG00033_A_4_B05	L1L2_st1	1	4
MGI:1341867	Mmp24	2	+	29164	FALSE	Conditional Ready	Promotorless	EUCOMM	PCS00008_A_E04	PG00008_A_1_E04 PG00008_A_2_E04 PG00008_A_3_E04 PG00008_A_4_E04 PGS00008_A_E04	L1L2_gt0	1	5
MGI:2684980	Mms22l	4	+	191	FALSE	Conditional Ready	Promotorless	EUCOMM	PCS00006_A_D02 PCS00016_A_D02	PG00006_A_1_C08 PG00006_A_4_C08 PGS00006_A_C08 PG00016_B_2_D02 PG00016_B_3_D02 PGS00016_A_D02	L1L2_gt2	2	6
MGI:2140623	Mob3c	4	+	43955	FALSE	Conditional Ready	Promotorless	EUCOMM	PCS00050_A_H03	PG00050_A_4_H03 PG00050_A_7_H03 PGS00050_A_H03	L1L2_gt0	1	3
MGI:1915643	Mogat1	1	+	41598	TRUE	Conditional Ready	Promotorless	KOMP-CSD	PCS00031_A_H10	PG00031_A_16_H10 PG00031_A_2_H10 PGS00031_A_H10 PG00031_A_3_H10 PG00031_A_15_H10	L1L2_st0	1	5
MGI:1917630	Mospd1	X	-	41061	FALSE	Conditional Ready	Promotorless	KOMP-CSD	PCS00027_A_C08	PGS00027_A_C08 PG00027_B_1_C08 PG00027_B_4_C08 PG00027_B_2_C08	L1L2_gt2	1	4
MGI:1891384	Mov10l1	15	+	43301	FALSE	Conditional Ready	Promotorless	KOMP-CSD	PCS00045_A_F04	PG00045_D_3_F04 PG00045_A_8_F04 PGS00045_D_F04 PG00045_D_4_F04 PG00045_A_7_F04	L1L2_gt1	1	5
MGI:1915223	Mphosph10	7	-	43286	FALSE	Conditional Ready	Promotorless	EUCOMM	PCS00054_B_H03	PG00054_A_3_H03 PG00054_A_4_H03 PGS00054_A_H03	L1L2_gt2	1	3
MGI:1922589	Mphosph8	14	+	41960	FALSE	Conditional Ready	Promotorless	EUCOMM	PCS00032_A_C02	PG00032_A_1_C02 PG00032_A_2_C02 PGS00032_A_C02	L1L2_gt0	1	3
MGI:2443138	Mphosph9	5	-	42841	FALSE	Conditional Ready	Promotorless	EUCOMM	PCS00054_B_F01	PG00054_A_1_F01 PG00054_A_2_F01 PGS00054_A_F01 PG00054_A_3_F01	L1L2_gt2	1	4
MGI:105941	Mpp1	X	-	40791	FALSE	Conditional Ready	Promotorless	EUCOMM	PCS00050_A_E07	PG00050_A_1_E07 PG00050_A_2_E07 PG00050_A_3_E07 PG00050_A_4_E07 PG00050_A_6_E07 PG00050_A_7_E07 PG00050_A_8_E07 PGS00050_A_E07 PG00050_A_5_E07	L1L2_gt1	1	9
MGI:1328354	Mpp3	11	-	88	FALSE	Conditional Ready	Promotorless	EUCOMM	PCS00004_A_C07 PCS00034_A_C07	PG00004_A_1_C07 PG00004_A_2_C07 PG00004_A_3_C07 PG00004_A_4_C07 PGS00004_A_C07 PG00034_A_3_F06 PG00034_A_5_F06 PG00034_A_5_F07 PG00034_A_6_F06 PGS00034_A_C07 PG00034_A_1_F06	L1L2_gt0	2	11
MGI:1349438	Mprip	11	+	288	TRUE	Conditional Ready	Promotorless	EUCOMM	PCS00004_A_H06	PG00004_A_1_H06 PG00004_A_3_H06 PGS00004_A_H06 PG00004_A_2_H06 PG00004_A_4_H06	L1L2_gt0	1	5
MGI:3609239	Mrap2	9	+	42748	FALSE	Conditional Ready	Promotorless	EUCOMM	PCS00046_A_D10	PG00046_A_1_D10 PG00046_A_2_D10 PG00046_A_4_D10 PGS00046_A_D10	L1L2_gt1	1	4
MGI:1100856	Mras	9	-	47682	FALSE	Conditional Ready	Promotorless	EUCOMM	MOHPC10006_A_D11	MOHFA0006_B_5_D11 MOHFA0006_B_7_D11 MOHFA0006_B_8_D11 MOHFAS5006_Z_D09 MOHFAS5006_Z_D10 MOHFA0006_B_3_D11	L1L2_gt1_Del_LacZ	1	6
MGI:97142	Mrc1	2	+	39270	FALSE	Conditional Ready	Promotorless	EUCOMM	PCS00043_A_B12	PG00043_A_1_B12 PG00043_A_3_B12 PGS00043_A_B12	L1L2_st1	1	3
MGI:1915317	Mrnip	11	+	261	FALSE	Conditional Ready	Promotorless	EUCOMM	PCS00004_A_G04 PCS00034_A_G04	PLB60002_B_2_A03 PLB60002_B_4_A03 PLB60002_B_1_A03 PG00004_A_1_F02 PG00004_A_1_G04 PG00004_A_2_G04 PG00004_A_4_G04 PGS00004_A_G04 PG00034_A_3_B09 PG00034_A_4_B09 PGS00034_A_G04 PLBS60002_B_A07 PG00034_A_5_B09	pL1L2_GT0_DelLacZ_bsd L1L2_gt0	2	13
MGI:2685873	Mroh7	4	-	39135	FALSE	Conditional Ready	Promotorless	EUCOMM	PCS00043_A_H10	PG00043_A_1_H10 PG00043_A_3_H10 PGS00043_A_H10	L1L2_gt1	1	3
MGI:2685873	Mroh7	4	-	47191	FALSE	Conditional Ready	Promotorless	EUCOMM	PCS00063_A_H02	PG00063_B_1_H02 PGS00063_A_H02 PG00063_B_4_H02	L1L2_gt0	1	3
MGI:2137202	Mrpl1	5	+	44974	FALSE	Conditional Ready	Promotorless	EUCOMM	PCS00054_B_D08	PG00054_A_1_D08 PG00054_A_2_D08 PGS00054_A_D08	L1L2_gt2	1	3
MGI:1333801	Mrpl10	11	+	87	FALSE	Conditional Ready	Promotorless	EUCOMM	PCS00005_A_B09 PCS00035_A_B09	PG00005_A_1_B09 PG00005_A_2_B09 PG00005_A_3_B09 PG00035_A_1_B09 PG00035_A_2_B09 PG00035_A_4_B09 PGS00035_A_B09 PGS00005_A_B09	L1L2_gt1	2	8
MGI:1926274	Mrpl19	6	-	43692	FALSE	Conditional Ready	Promotorless	EUCOMM	PCS00054_B_H05	PG00054_A_1_H05 PGS00054_A_H05	L1L2_gt2	1	2
MGI:1333794	Mrpl22	11	+	41846	FALSE	Conditional Ready	Promotorless	KOMP-CSD	PCS00031_A_E10	PG00031_A_2_E10 PGS00031_A_E10	L1L2_gt2	1	2
MGI:1915861	Mrpl28	17	+	221035	FALSE	Conditional Ready	Promotorless	KOMP-CSD	PCS00162_A_G12	PLNS50001_D_E07 MOHFA50001_D_8_D06 MOHFA50001_D_3_D06 MOHFA50001_D_1_D06 MOHFA50001_D_7_D06	L1L2_gt0	1	5
MGI:2137204	Mrpl3	9	+	42128	FALSE	Conditional Ready	Promotorless	KOMP-CSD	PCS00036_A_A05	PGS00036_A_A05 PG00036_A_4_A05 PG00036_A_2_A05	L1L2_gt1	1	3
MGI:1333820	Mrpl30	1	+	44997	FALSE	Conditional Ready	Promotorless	KOMP-CSD	PCS00052_A_B03	PG00052_A_6_B03 PG00052_A_3_B03 PG00052_A_7_B03 PG00052_A_1_B03 PG00052_A_8_B03 PGS00052_A_B03 PG00052_A_2_B03 PG00052_A_4_B03	L1L2_gt0	1	8
MGI:1914286	Mrpl45	11	+	89	FALSE	Conditional Ready	Promotorless	EUCOMM	PCS00005_A_B10	PG00005_A_1_B10 PG00005_A_2_B10 PG00005_A_3_B10 PG00005_A_4_B10 PGS00005_A_B10	L1L2_gt1	1	5
MGI:1914462	Mrpl55	11	+	43541	FALSE	Conditional Ready	Promotorless	EUCOMM	PCS00047_A_D11	PGS00047_A_D11 PG00047_A_2_C12	L1L2_st0	1	2
MGI:2137211	Mrpl9	3	+	41456	FALSE	Conditional Ready	Promotorless	EUCOMM	PCS00033_A_A05	PG00033_A_1_A05 PG00033_A_2_A05 PG00033_A_2_B04 PG00033_A_3_A05 PG00033_A_4_A05 PG00033_A_4_B04 PGS00033_A_A05	L1L2_gt1	1	7
MGI:1913657	Mrps15	4	+	499	FALSE	Conditional Ready	Promotorless	EUCOMM	PCS00007_A_H12	PGS00007_A_H12	L1L2_gt1	1	1
MGI:2385255	Mrps35	6	+	42320	TRUE	Conditional Ready	Promotorless	EUCOMM	PCS00038_A_E04	PG00038_A_3_E04 PGS00038_A_E04 PG00038_A_1_E04	L1L2_gt1	1	3
MGI:2685748	Mrs2	13	-	38867	TRUE	Conditional Ready	Promotorless	KOMP-CSD	PCS00021_A_H10	PGS00021_A_H10 PG00021_A_2_H10 PGS00021_B_H10	L1L2_gt1 L1L2_st1	1	3
MGI:1917152	Mrto4	4	-	47106	FALSE	Conditional Ready	Promotorless	EUCOMM	PCS00064_A_E08	PG00064_A_1_E08 PG00064_A_4_E08 PGS00064_A_E08	L1L2_gt1	1	3
MGI:107376	Msi1	5	+	39384	FALSE	Conditional Ready	Promotorless	EUCOMM	PCS00042_A_C06	PG00042_A_4_C06 PGS00042_A_C06	L1L2_gt0	1	2
MGI:2150037	Mta1	12	+	39637	FALSE	Conditional Ready	Promotorless	EUCOMM	PCS00001_A_E11	PGS00001_A_E11	L1L2_gt1	1	1
MGI:2150037	Mta1	12	+	39847	FALSE	Conditional Ready	Promotorless	EUCOMM	PCS00019_A_A09	PG00019_A_1_A09 PGS00019_A_A09	L1L2_gt1	1	2
MGI:2151172	Mta3	17	+	39850	TRUE	Conditional Ready	Promotorless	KOMP-CSD	PCS00019_A_G08	PLNS50001_D_A12 MOHFA50001_D_7_D12 MOHFA50001_D_2_D12 MOHFA50001_D_4_D12 MOHFA50001_D_6_D12 MOHFA50001_D_3_D12 MOHFA50001_D_8_D12 MOHFA50001_D_5_D12 PG00019_A_3_G08 PG00019_A_4_G08 PGS00019_A_G08 PG00019_A_1_G08 PG00019_A_2_G08	L1L2_gt1	1	13
MGI:2151172	Mta3	17	+	47357	TRUE	Conditional Ready	Promotorless	KOMP-CSD	PCS00013_A_B03	PGS00013_A_A04	L1L2_gt1	1	1
MGI:1914152	Mtap	4	+	36358	FALSE	Conditional Ready	Promotorless	KOMP-CSD	PCS00023_E_F03	PG00023_E_1_F03 PG00023_E_4_F03 PG00023_E_3_F03 PG00023_E_2_F03 PGS00023_E_F03	L1L2_gt0	1	5
MGI:101786	Mtf1	4	+	36746	FALSE	Conditional Ready	Promotorless	KOMP-CSD	PCS00023_E_H04	PG00023_C_1_H04 PG00023_D_4_H04 PG00023_E_2_H04 PG00023_E_4_H04 PGS00023_A_H04 PGS00023_E_H04 PG00023_C_4_H04	L1L2_gt0	1	7
MGI:105050	Mtf2	5	+	40820	FALSE	Conditional Ready	Promotorless	EUCOMM	PCS00030_B_G03	PG00030_B_2_G03 PG00030_B_3_G03 PG00030_B_4_G03 PG00030_C_2_G03 PG00030_C_3_G03 PG00030_C_4_G03 PGS00030_B_G03 PGS00030_C_G03 PG00030_C_1_G03	L1L2_gt1	1	9
MGI:1916856	Mtfmt	9	+	41729	FALSE	Conditional Ready	Promotorless	KOMP-CSD	PCS00031_A_F10	PGS00031_A_F10 PG00031_A_13_F10 PG00031_A_16_F10	L1L2_gt2	1	3
MGI:1914722	Mtfr1	3	+	45871	TRUE	Conditional Ready	Promotorless	EUCOMM	PCS00060_A_E02	PG00060_A_1_E02 PG00060_A_2_E02 PG00060_A_3_E02 PG00060_A_4_E02 PGS00060_A_E02	L1L2_gt0	1	5
MGI:2685015	Mtg1	7	+	47060	FALSE	Conditional Ready	Promotorless	EUCOMM	PCS00064_A_A02	PG00064_A_1_A02 PG00064_A_2_A02 PG00064_A_3_A02 PGS00064_A_A02	L1L2_gt0	1	4
MGI:1923616	Mtif3	5	-	42952	FALSE	Conditional Ready	Promotorless	EUCOMM	PCS00047_A_E09	PG00047_A_3_E09 PGS00047_A_E09	L1L2_gt0	1	2
MGI:2180699	Mtmr4	11	+	62	FALSE	Conditional Ready	Promotorless	EUCOMM	PCS00034_A_B12	PG00034_A_5_G01 PGS00034_A_B12	L1L2_gt0	1	2
MGI:1928394	Mtor	4	+	608	FALSE	Conditional Ready	Promotorless	EUCOMM	MOHPC10006_A_E02 MOHPC10006_A_E01 PCS00007_A_F09 PCS00017_A_F09	MOHFA0006_A_1_E02 MOHFA0006_A_2_E01 MOHFA0006_A_3_E01 MOHFA0006_A_3_E02 MOHFA0006_A_4_E01 MOHFA0006_A_4_E02 MOHFA0006_A_5_E01 MOHFA0006_A_5_E02 MOHFA0006_A_6_E01 MOHFA0006_A_6_E02 MOHFA0006_A_7_E01 MOHFA0006_A_7_E02 MOHFA0006_A_8_E02 MOHFA0006_B_2_E01 MOHFA0006_B_3_E01 MOHFA0006_B_4_E01 MOHFA0006_B_4_E02 MOHFA0006_B_5_E01 MOHFA0006_B_5_E02 MOHFA0006_B_6_E01 MOHFA0006_B_8_E01 MOHFAS5006_Z_D11 MOHF…	L1L2_gt0_Del_LacZ pL1L2_GT0_DelLacZ_bsd L1L2_gt0	4	40
MGI:1918830	Mtrf1l	10	-	41629	FALSE	Conditional Ready	Promotorless	KOMP-CSD	PCS00031_A_F09	PG00031_A_14_F09 PG00031_A_15_F09 PG00031_A_16_F09 PGS00031_A_F09	L1L2_gt1	1	4
MGI:97231	Muc1	3	+	40447	FALSE	Conditional Ready	Promotorless	EUCOMM	PCS00026_B_B06	PG00026_A_2_B06 PG00026_A_3_B09 PG00026_A_4_B06 PG00026_A_4_B09 PG00026_B_2_B06 PG00026_B_3_B06 PG00026_B_4_B06 PGS00026_A_B06 PGS00026_B_B06	L1L2_st1	1	9
MGI:1915600	Mul1	4	+	555	FALSE	Conditional Ready	Promotorless	EUCOMM	PCS00017_A_H08	PG00017_B_1_H08 PG00017_B_2_H08 PGS00017_A_H08 PG00017_B_3_H08	L1L2_st0	1	4
MGI:1919793	Mvb12b	2	-	39292	FALSE	Conditional Ready	Promotorless	EUCOMM	PCS00042_A_B02	PG00042_A_1_B02 PG00042_A_2_B02 PG00042_A_3_B02 PG00042_A_4_B02 PGS00042_A_B02	L1L2_gt0	1	5
MGI:97243	Mx1	16	-	39033	FALSE	Conditional Ready	Promotorless	EUCOMM	PCS00026_B_C05	PG00026_A_1_B05 PG00026_A_2_B05 PG00026_A_3_B05 PG00026_A_4_B05 PG00026_B_1_C05 PG00026_B_2_C05 PG00026_B_3_C05 PG00026_B_5_C05 PG00026_B_6_C05 PG00026_B_7_C05 PGS00026_A_C05 PG00026_B_4_C05 PGS00026_B_C05	L1L2_gt1	1	13
MGI:104991	Mxd4	5	-	45050	FALSE	Conditional Ready	Promotorless	KOMP-CSD	PCS00055_A_F04	PG00055_A_7_F04 PG00055_A_1_F04 PG00055_A_2_F04 PG00055_A_3_F04 PG00055_A_6_F04 PGS00055_A_F04 PG00055_A_5_F04 PGS00055_B_F04	L1L2_gt2	1	8
MGI:1914872	Mxra7	11	-	150	FALSE	Conditional Ready	Promotorless	EUCOMM	PCS00004_A_D10 PCS00034_A_D10	PG00004_A_1_D10 PG00004_A_3_D10 PGS00004_A_D10 PG00034_A_4_E03 PG00034_A_5_E03 PG00034_A_6_E03 PG00034_A_7_E03 PG00034_A_8_E03 PGS00034_A_D10 PG00004_A_4_D10	L1L2_gt0 L1L2_st0	2	10
MGI:106181	Mybbp1a	11	+	238810	FALSE	Conditional Ready	Promotorless	EUCOMM	PCP10002_A_E11	PFA0002_A_2_E11	L1L2_gt0	1	1
MGI:1916003	Mybphl	3	+	41446	FALSE	Conditional Ready	Promotorless	KOMP-CSD	PCS00028_A_D08	PG00028_B_1_D08 PG00028_B_2_D08 PGS00028_A_D08 PG00028_B_3_D08	L1L2_gt1	1	4
MGI:97250	Myc	15	+	91614	FALSE	Conditional Ready	Promotorless	EUCOMM	PCTS00111_B_E10	PLBS60002_B_D03 PLB60002_B_2_E01	pL1L2_GT0_DelLacZ_bsd	1	2
MGI:2388726	Mycbpap	11	-	44332	FALSE	Conditional Ready	Promotorless	KOMP-CSD	PCS00049_A_A02	PGS00049_B_A02 PG00049_A_1_A02 PGS00049_A_A02 PG00049_A_3_A02 PG00049_A_8_A02 PG00049_A_4_A02	L1L2_gt0	1	6
MGI:104592	Myef2	2	-	39429	FALSE	Conditional Ready	Promotorless	EUCOMM	PCS00026_B_D09	PG00026_A_4_D09 PG00026_B_1_D09 PG00026_B_2_D09 PG00026_B_4_D09 PGS00026_B_D09 PG00026_B_3_D09	L1L2_gt2	1	6
MGI:1339967	Myh13	11	+	44277	FALSE	Conditional Ready	Promotorless	KOMP-CSD	PCS00048_A_D02	PGS00048_A_D02 PG00048_A_4_D02	L1L2_gt0	1	2
MGI:1919210	Myh14	7	-	40498	FALSE	Conditional Ready	Promotorless	EUCOMM	PCS00026_B_D02	PG00026_B_3_D02 PG00026_B_4_D02 PGS00026_B_D02	L1L2_gt0	1	3
MGI:1339710	Myh2	11	+	41367	FALSE	Conditional Ready	Promotorless	KOMP-CSD	PCS00028_A_A04	PG00028_B_2_A04 PGS00028_A_A04 PG00028_B_1_A04	L1L2_gt0	1	3
MGI:2155600	Myh7	14	-	38975	FALSE	Conditional Ready	Promotorless	KOMP-CSD	PCS00020_A_D03	PGS00020_A_D03 PG00020_A_1_D03 PG00020_A_4_D02 PG00020_A_1_D02 PG00020_A_4_D03 PG00020_A_2_D02	L1L2_gt0	1	6
MGI:2155600	Myh7	14	-	41181	FALSE	Conditional Ready	Promotorless	KOMP-CSD	PCS00031_A_A02	PG00031_B_4_A03 PGS00031_A_A02	L1L2_gt0	1	2
MGI:107717	Myh9	15	-	44142	FALSE	Conditional Ready	Promotorless	EUCOMM	PCS00046_A_F06	PG00046_A_1_F06 PG00046_A_3_F06 PG00046_A_4_F06 PGS00046_A_F06 PG00046_A_2_F06	L1L2_gt1	1	5
MGI:97268	Myl3	9	+	43734	FALSE	Conditional Ready	Promotorless	EUCOMM	PCS00046_A_B04	PG00046_A_1_B04 PGS00046_A_B04	L1L2_gt0	1	2
MGI:97267	Myl4	11	+	47401	FALSE	Conditional Ready	Promotorless	EUCOMM	PCS00063_A_F05	PG00063_B_4_F05 PGS00063_A_F05	L1L2_gt0	1	2
MGI:2138915	Myl9	2	+	44002	FALSE	Conditional Ready	Promotorless	KOMP-CSD	PCS00048_A_B05	PG00048_A_2_B05 PGS00048_A_B05 PG00048_A_3_B05	L1L2_gt1	1	3
MGI:1913446	Myo19	11	+	47	FALSE	Conditional Ready	Promotorless	EUCOMM	PCS00004_A_B09 PCS00034_A_B09	PG00004_A_1_B09 PG00004_A_3_B09 PGS00004_A_B09 PG00034_A_6_G04 PG00034_A_7_G03 PGS00034_A_B09 PG00034_A_8_G04	L1L2_gt0	2	7
MGI:107728	Myo1d	11	-	15	FALSE	Conditional Ready	Promotorless	EUCOMM	PCS00006_A_A05 PCS00016_A_A05	PG00006_A_3_A05 PGS00006_A_A05 PG00016_B_1_A05 PGS00016_A_A05	L1L2_gt2	2	4
MGI:2448580	Myo3b	2	+	39337	FALSE	Conditional Ready	Promotorless	EUCOMM	PCS00044_A_F03	PG00044_A_6_F03 PG00044_A_7_F03 PG00044_A_8_F03 PGS00044_A_F03 PG00044_A_5_F03	L1L2_gt1	1	5
MGI:105976	Myo5a	9	+	37450	TRUE	Conditional Ready	Promotorless	KOMP-CSD	PCS00023_E_G08	PG00023_E_2_G08 PG00023_E_4_G08 PGS00023_A_G08 PG00023_C_3_G08 PG00023_C_4_G08 PG00023_D_3_G08 PG00023_D_4_G08 PGS00023_E_G08 PG00023_C_1_G08 PG00023_D_2_G08 PG00023_E_3_G08 PG00023_C_2_G08 PG00023_D_1_G08	L1L2_gt0	1	13
MGI:104785	Myo6	9	+	40489	FALSE	Conditional Ready	Promotorless	EUCOMM	PCS00026_B_H06	PG00026_A_1_H06 PG00026_A_2_H08 PG00026_A_3_H06 PG00026_A_4_H06 PG00026_A_4_H07 PG00026_B_3_H06 PG00026_B_4_H06 PG00026_B_5_H06 PG00026_B_7_H06 PG00026_B_8_H06 PGS00026_A_H06 PGS00026_B_H06 PG00026_A_2_H06 PG00026_A_4_H08	L1L2_gt1 L1L2_gt0	1	14
MGI:2137495	Myocd	11	-	309	FALSE	Conditional Ready	Promotorless	EUCOMM	PCS00005_A_G02 PCS00035_A_G02	PG00005_A_1_G02 PG00005_A_2_G02 PGS00005_A_G02 PG00035_A_1_G02 PGS00035_A_G02 PG00005_A_3_G02	L1L2_gt1	2	6
MGI:1913063	Myoz2	3	-	47078	TRUE	Conditional Ready	Promotorless	EUCOMM	PCS00064_A_C02	PG00064_A_2_C02 PG00064_A_3_C02 PG00064_A_4_C02 PGS00064_A_C02 PG00064_A_1_C02	L1L2_gt0	1	5
MGI:2444584	Mysm1	4	-	36374	FALSE	Conditional Ready	Promotorless	KOMP-CSD	PCS00021_A_B05 PCP10002_A_A04	PGS00021_A_B05 PG00021_B_2_B05 PG00021_B_3_B05 PGS00021_B_B05 PG00021_A_2_B05 PG00021_B_1_B05 PFA0002_A_3_A04 PFA0002_A_4_A04 PFA0002_A_7_A04 PFA0002_A_1_A04 PFA0002_A_5_A04 PFA0002_A_6_A04	L1L2_gt0 L1L2_st0	2	12
MGI:2684414	N4bp2	5	+	46344	FALSE	Conditional Ready	Promotorless	EUCOMM	PCS00062_A_C04	PG00062_A_1_C04 PG00062_A_3_C04 PG00062_A_4_C04 PGS00062_A_C04	L1L2_gt2	1	4
MGI:1915255	Naa10	X	-	40591	FALSE	Conditional Ready	Promotorless	EUCOMM	PCS00033_A_C12	PG00033_A_2_B12 PGS00033_A_C12	L1L2_gt2	1	2
MGI:1926164	Nadsyn1	7	-	44427	FALSE	Conditional Ready	Promotorless	KOMP-CSD	PCS00049_A_B07	PG00049_A_1_B07 PGS00049_B_B07	L1L2_gt2	1	2
MGI:1919200	Nanog	6	+	231974	TRUE	Conditional Ready	Promotorless	KOMP-CSD	PCS00171_A_A05	MOHFA50001_D_1_F12 MOHFA50001_D_3_F12	L1L2_gt1	1	2
MGI:2149820	Nans	4	+	387	TRUE	Conditional Ready	Promotorless	EUCOMM	PCS00017_A_C03	PG00017_B_4_C03 PGS00017_A_C03 PG00017_B_3_C03 PG00017_B_2_C03	L1L2_gt0	1	4
MGI:2142075	Nars2	7	+	42847	FALSE	Conditional Ready	Promotorless	EUCOMM	PCS00047_A_D01	PG00047_A_2_D01 PG00047_A_3_D01 PG00047_A_4_D01 PGS00047_A_D01	L1L2_gt0	1	4
MGI:1344388	Natd1	11	-	33797	FALSE	Conditional Ready	Promotorless	EUCOMM	PCS00011_A_F06 PCS00043_A_F06	PG00011_A_2_F06 PG00011_A_4_G06 PG00043_A_2_F07 PG00043_A_4_F06 PGS00043_A_F06 PGS00011_A_F06	L1L2_gt1 L1L2_gtk	2	6
MGI:2444777	Ncaph	2	-	48020	FALSE	Conditional Ready	Promotorless	EUCOMM	PCP10002_A_D03 PCP10002_A_D04	PFA0002_A_3_D03 PFA0002_A_3_D04 PFA0002_A_6_D03	L1L2_gt0	2	3
MGI:1289164	Ncaph2	15	+	42905	FALSE	Conditional Ready	Promotorless	EUCOMM	PCS00046_A_H01	PG00046_A_3_H01 PGS00046_A_H01	L1L2_gt0	1	2
MGI:1915342	Ncbp2	16	+	43913	FALSE	Conditional Ready	Promotorless	EUCOMM	PCS00050_A_F03	PG00050_A_3_F03 PG00050_A_4_F03 PG00050_A_5_F03 PG00050_A_6_F03 PG00050_A_7_F03 PG00050_A_8_F03 PGS00050_A_F03	L1L2_gt0	1	7
MGI:1914124	Ncbp3	11	+	331	FALSE	Conditional Ready	Promotorless	EUCOMM	PCS00007_A_G01 PCS00017_A_G01	PGS00007_A_G01 PG00017_B_2_H01 PG00017_B_3_H01 PG00017_B_4_H01 PGS00017_A_G01	L1L2_gt0	2	5
MGI:2443191	Nceh1	3	+	46122	FALSE	Conditional Ready	Promotorless	EUCOMM	PCS00060_A_A11	PGS00060_A_A11 PG00060_A_3_A11	L1L2_st0	1	2
MGI:1926047	Ndor1	2	-	39293	FALSE	Conditional Ready	Promotorless	EUCOMM	PCS00042_A_A09	PG00042_A_1_A09 PG00042_A_4_A09 PGS00042_A_A09	L1L2_gt0	1	3
MGI:1352499	Ndrg3	2	-	35448	FALSE	Conditional Ready	Promotorless	KOMP-CSD	PCS00023_E_G07	PG00023_E_2_G07 PG00023_D_1_G06 PG00023_C_1_G06 PGS00023_E_G07 PGS00023_A_G07 PG00023_D_1_G07 PG00023_E_3_G07 PG00023_D_3_G06 PG00023_C_3_G06 PG00023_C_4_G06 PG00023_E_4_G07 PG00023_D_2_G06 PG00023_E_1_G07 PG00023_C_2_G06	L1L2_gt0	1	14
MGI:1913358	Ndufa9	6	-	119146	FALSE	Conditional Ready	Promotorless	KOMP-CSD	PCS00128_C_H02	PLNS50001_D_D10 MOHFA50001_D_8_H08 MOHFA50001_D_2_H08 MOHFA50001_D_5_H08 MOHFA50001_D_6_H08 MOHFA50001_D_7_H08 MOHFA50001_D_3_H08 MOHFA50001_D_4_H08 MOHFA50001_D_1_H08	L1L2_gt2	1	9
MGI:1924197	Ndufaf6	4	-	172	FALSE	Conditional Ready	Promotorless	EUCOMM	PCS00006_A_C12 PCS00016_A_C12	PG00006_A_1_C06 PGS00006_A_C06 PG00016_B_2_C12 PGS00016_A_C12 PG00006_A_3_C06	L1L2_gt2	2	5
MGI:1915599	Ndufs3	2	-	41879	FALSE	Conditional Ready	Promotorless	EUCOMM	PCS00032_A_H09	PG00032_A_2_H09 PG00032_A_3_H09 PG00032_A_4_H09 PGS00032_A_H09	L1L2_st1	1	4
MGI:1916602	Necab1	4	-	179	FALSE	Conditional Ready	Promotorless	EUCOMM	PCS00004_A_E07 PCS00034_A_E07	PG00004_A_3_E05 PG00004_A_4_E07 PGS00004_A_E07 PG00034_A_1_D05 PG00034_A_1_D06 PG00034_A_3_D05 PG00034_A_4_D05 PG00034_A_5_D05 PG00034_A_7_D05 PGS00034_A_E07	L1L2_gt0	2	10
MGI:2152211	Necab2	8	+	42356	FALSE	Conditional Ready	Promotorless	KOMP-CSD	PCS00036_A_E07	PG00036_A_3_E07 PG00036_A_2_E07 PGS00036_A_E07 PG00036_A_1_E07 PG00036_A_2_D07 PG00036_A_3_D07 PG00036_A_4_D07	L1L2_gt2	1	7
MGI:1861721	Necab3	2	-	29093	FALSE	Conditional Ready	Promotorless	EUCOMM	PCS00008_A_H02	PG00008_A_1_H02 PGS00008_A_H02	L1L2_gt0	1	2
MGI:1913397	Necap2	4	-	46598	TRUE	Conditional Ready	Promotorless	EUCOMM	PCS00062_A_A08	PG00062_A_1_A08	L1L2_gt1	1	1
MGI:2384588	Neil3	8	-	42332	FALSE	Conditional Ready	Promotorless	KOMP-CSD	PCS00036_A_G07	PG00036_A_2_G07 PGS00036_A_G07 PG00036_A_3_G07 PG00036_A_1_G07 PG00036_A_4_G07	L1L2_gt2	1	5
MGI:1346098	Nelfa	5	-	43526	FALSE	Conditional Ready	Promotorless	EUCOMM	PCS00047_A_G05	PG00047_A_1_G05 PG00047_A_3_G05 PGS00047_A_G05 PG00047_A_4_G05	L1L2_gt0	1	4
MGI:1931035	Nelfb	2	-	39282	FALSE	Conditional Ready	Promotorless	EUCOMM	PCS00042_A_H08	PG00042_A_1_G08 PG00042_A_1_G09 PGS00042_A_H08 PG00042_A_2_G08	L1L2_gt0	1	4
MGI:2443902	Nell1	7	+	43045	FALSE	Conditional Ready	Promotorless	KOMP-CSD	PCS00041_A_C09	PGS00041_A_C09 PG00041_A_2_C09 PG00041_A_3_C09 PG00041_A_1_C09	L1L2_st0	1	4
MGI:97306	Nf1	11	+	38164	FALSE	Conditional Ready	Promotorless	KOMP-CSD	PCS00023_E_A01	PG00023_D_1_A01 PG00023_D_2_A01 PG00023_D_3_A01 PG00023_E_1_A01 PG00023_E_2_A01 PG00023_E_3_A01 PG00023_E_4_A01 PGS00023_A_A01 PGS00023_E_A01 PG00023_D_4_A01	L1L2_gt0	1	10
MGI:99421	Nfe2l1	11	-	115346	FALSE	Conditional Ready	Promotorless	EUCOMM	PCTS00123_A_B02 PCP10002_A_E10	MOHFA50001_D_4_C10 PFA0002_A_1_E10 PFA0002_A_2_E10 PFA0002_A_3_E10 PFA0002_A_5_E10 PFA0002_A_4_E10	L1L2_gt0	2	6
MGI:108056	Nfia	4	+	437	FALSE	Conditional Ready	Promotorless	EUCOMM	PCS00007_A_F05 PCS00017_A_F05	PG00007_B_1_F05 PG00007_B_2_F05 PG00007_B_2_F06 PG00007_B_3_F05 PGS00007_A_F05 PG00017_B_3_G05 PGS00017_A_F05 PG00017_B_2_F05 PG00017_B_4_F05 PG00017_B_3_F05	L1L2_gt0	2	10
MGI:103188	Nfib	4	-	26	FALSE	Conditional Ready	Promotorless	EUCOMM	PCS00004_A_A12	PG00004_A_2_A12 PG00004_A_4_A12 PGS00004_A_A12 PG00004_A_1_A12	L1L2_gt0	1	4
MGI:97312	Nfkb1	3	-	35825	FALSE	Conditional Ready	Promotorless	KOMP-CSD	PCS00023_E_B09	PG00023_D_1_B09 PG00023_D_2_B09 PG00023_D_4_B09 PG00023_E_1_B09 PG00023_E_2_B09 PG00023_E_3_B09 PG00023_E_4_B09 PGS00023_A_B09 PGS00023_E_B09	L1L2_gt0	1	9
MGI:3041243	Nfkbid	7	+	44655	FALSE	Conditional Ready	Promotorless	EUCOMM	PCS00050_A_D06	PG00050_A_5_D06 PG00050_A_6_D06 PG00050_A_7_D06 PG00050_A_8_D06 PGS00050_A_D06	L1L2_gt0	1	5
MGI:1316706	Nfs1	2	-	33621	FALSE	Conditional Ready	Promotorless	EUCOMM	PCS00008_A_D09	PG00008_A_1_D09 PG00008_A_1_E11 PG00008_A_1_F12 PG00008_A_2_D09 PGS00008_A_D09 PG00008_A_4_D09	L1L2_gt1 L1L2_gt2	1	6
MGI:1921414	Nfx1	4	+	35972	TRUE	Conditional Ready	Promotorless	KOMP-CSD	PCS00023_E_H10	PG00023_E_2_H10 PGS00023_A_H10 PG00023_D_3_G10 PG00023_E_3_H10 PGS00023_E_H10 PG00023_D_2_G10 PG00023_D_3_H10 PG00023_D_1_H10 PG00023_D_4_H10 PG00023_E_4_H10	L1L2_gt1	1	10
MGI:1923646	Nfxl1	5	-	44488	FALSE	Conditional Ready	Promotorless	EUCOMM	PCS00050_A_C05	PG00050_A_3_C05 PGS00050_A_C05	L1L2_gt0	1	2
MGI:97316	Nfya	17	-	169999	TRUE	Conditional Ready	Promotorless	KOMP-CSD	PCS00153_A_C04	PLBS60002_B_D06 PLB60002_B_1_C12 PLB60002_B_4_C12 PLB60002_B_3_C12 PLB60002_B_2_D12 PLB60002_B_2_C12	pL1L2_GT0_DelLacZ_bsd	1	6
MGI:2151886	Ngb	12	-	40215	TRUE	Conditional Ready	Promotorless	EUCOMM	PCS00026_B_E02	PG00026_B_1_E02 PG00026_B_2_E02 PG00026_B_3_E02 PG00026_B_4_E02 PGS00026_B_E02	L1L2_gt2	1	5
MGI:97323	Ngfr	11	-	73	FALSE	Conditional Ready	Promotorless	EUCOMM	PCS00004_A_C03 PCS00034_A_C03	PG00004_A_1_C03 PG00004_A_2_C03 PG00004_A_3_C03 PG00004_A_4_C03 PGS00004_A_C03 PG00034_A_3_F10 PG00034_A_5_F10 PG00034_A_8_F10 PGS00034_A_C03 PG00034_A_7_F10	L1L2_gt0 L1L2_st0	2	10
MGI:1913276	Ngly1	14	+	41957	FALSE	Conditional Ready	Promotorless	KOMP-CSD	PCS00036_A_C09	PG00036_A_2_C09 PG00036_A_3_C09 PGS00036_A_C09 PG00036_A_1_C09	L1L2_gt2	1	4
MGI:2684894	Nhs	X	-	40553	FALSE	Conditional Ready	Promotorless	EUCOMM	PCS00033_A_F09	PG00033_A_3_F09 PGS00033_A_F09	L1L2_gt1	1	2
MGI:1925427	Ninl	2	-	39482	FALSE	Conditional Ready	Promotorless	EUCOMM	PCS00044_A_B08	PG00044_A_5_B08 PG00044_A_7_B08 PG00044_A_8_B08 PGS00044_A_B08	L1L2_gt1	1	4
MGI:1925427	Ninl	2	-	40511	FALSE	Conditional Ready	Promotorless	EUCOMM	PCS00026_B_D03	PG00026_A_1_E03 PG00026_A_1_F03 PG00026_A_1_G04 PG00026_A_3_F03 PG00026_A_3_G04 PG00026_A_4_D03 PG00026_A_4_E03 PG00026_A_4_F03 PG00026_A_4_G03 PG00026_A_4_H03 PG00026_B_1_D03 PG00026_B_3_D03 PG00026_B_4_D03 PG00026_B_6_D03 PGS00026_A_D03 PGS00026_B_D03 PG00026_A_4_G04	L1L2_gt0	1	17
MGI:1921802	Nipal3	4	-	530	FALSE	Conditional Ready	Promotorless	EUCOMM	PCS00007_A_H07	PG00007_B_1_H07 PG00007_B_2_H07 PG00007_B_3_H07 PG00007_B_4_H07 PGS00007_A_H07	L1L2_gt0	1	5
MGI:1921802	Nipal3	4	-	45716	FALSE	Conditional Ready	Promotorless	EUCOMM	PCS00060_A_D08	PG00060_A_1_D08 PG00060_A_2_D08 PGS00060_A_D08	L1L2_gt0	1	3
MGI:1278344	Nipsnap1	11	+	43324	FALSE	Conditional Ready	Promotorless	EUCOMM	PCS00046_A_F08	PG00046_A_1_F08 PG00046_A_2_F08 PG00046_A_3_F08 PGS00046_A_F08	L1L2_gt2	1	4
MGI:1920648	Nipsnap3a	4	+	44188	TRUE	Conditional Ready	Promotorless	KOMP-CSD	PCS00048_A_F03	PGS00048_A_F03 PG00048_A_1_F03 PG00048_A_2_F03 PG00048_A_3_F03 PG00048_A_4_F03	L1L2_gt0	1	5
MGI:1913786	Nipsnap3b	4	+	397	FALSE	Conditional Ready	Promotorless	EUCOMM	PCS00007_A_F03 PCS00017_A_F03	PGS00007_A_F03 PG00017_B_2_F03 PG00017_B_4_F03 PGS00017_A_F03 PG00017_B_3_F03	L1L2_gt0	2	5
MGI:1920662	Nme8	13	-	42776	FALSE	Conditional Ready	Promotorless	KOMP-CSD	PCS00041_A_E01	PGS00041_A_E01 PG00041_A_1_E01 PG00041_A_3_E01 PG00041_A_2_E01	L1L2_gt0	1	4
MGI:1913704	Nmnat1	4	-	39204	FALSE	Conditional Ready	Promotorless	EUCOMM	PCS00011_A_B08 PCS00043_A_B08	PG00011_A_1_B08 PG00011_A_2_B08 PG00011_A_3_B08 PGS00011_A_B08 PG00043_A_4_B08 PGS00043_A_B08 PG00011_A_4_B08	L1L2_gt1	2	7
MGI:1202298	Nmt2	2	+	39229	FALSE	Conditional Ready	Promotorless	EUCOMM	PCS00042_A_F10	PG00042_A_2_F10 PGS00042_A_F10	L1L2_gt0	1	2
MGI:104716	Nnat	2	+	44045	FALSE	Conditional Ready	Promotorless	KOMP-CSD	PCS00048_A_E11	PGS00048_A_E11 PG00048_A_2_E11 PG00048_A_3_E11 PG00048_A_4_E11	L1L2_st0	1	4
MGI:109279	Nnt	13	-	41840	FALSE	Conditional Ready	Promotorless	EUCOMM	PCS00032_A_B10	PG00032_A_1_B10 PG00032_A_3_B10 PG00032_A_4_B10 PGS00032_A_B10	L1L2_gt1	1	4
MGI:1918765	Nol4l	2	-	39575	FALSE	Conditional Ready	Promotorless	EUCOMM	PCS00043_A_B02	PG00043_A_2_B02 PGS00043_A_B02	L1L2_gt0	1	2
MGI:1861749	Nom1	5	+	45063	FALSE	Conditional Ready	Promotorless	KOMP-CSD	PCS00055_A_B06	PG00055_A_4_B06 PGS00055_B_B06 PGS00055_A_B06 PG00055_A_1_B06 PG00055_A_2_B06	L1L2_gt2	1	5
MGI:97361	Nos2	11	+	10	FALSE	Conditional Ready	Promotorless	EUCOMM	PCS00006_A_A03	PG00006_A_4_A03 PGS00006_A_A03	L1L2_gt2	1	2
MGI:2449980	Noxa1	2	-	40202	FALSE	Conditional Ready	Promotorless	EUCOMM	PCS00030_B_B10	PG00030_C_1_B10 PG00030_C_2_B10 PG00030_C_3_B10 PG00030_C_4_B10 PGS00030_C_B10	L1L2_gt2	1	5
MGI:2685089	Npc1l1	11	-	37	FALSE	Conditional Ready	Promotorless	EUCOMM	PCS00004_A_B05 PCS00034_A_B05	PG00004_A_1_B05 PG00004_A_3_B05 PG00004_A_4_B05 PGS00004_A_B05 PG00034_A_1_G08 PG00034_A_5_G08 PG00034_A_6_G08 PG00034_A_7_G08 PG00034_A_8_G08 PGS00034_A_B05 PG00004_A_2_B05 PG00034_A_4_G08	L1L2_gt0 L1L2_st0	2	12
MGI:2448523	Npepl1	2	+	35661	FALSE	Conditional Ready	Promotorless	KOMP-CSD	PCS00020_A_H09	PGS00020_A_H09 PG00020_A_4_H09	L1L2_gt1	1	2
MGI:1858233	Nphp1	2	-	28507	FALSE	Conditional Ready	Promotorless	EUCOMM	PCS00008_A_C01	PG00008_A_1_C01 PG00008_A_2_C01 PG00008_A_3_C01 PG00008_A_4_C01 PGS00008_A_C01	L1L2_gt0	1	5
MGI:2679787	Nploc4	11	-	38762	FALSE	Conditional Ready	Promotorless	EUCOMM	PCS00019_A_G01	PG00019_A_2_G01 PG00019_A_3_H01 PGS00019_A_G01 PG00019_A_3_G01	L1L2_gt0	1	4
MGI:2441738	Npsr1	9	+	42694	FALSE	Conditional Ready	Promotorless	KOMP-CSD	PCS00041_A_G06	PG00041_A_3_G06 PGS00041_A_G06 PG00041_A_1_G06	L1L2_gt1	1	3
MGI:103187	Nqo1	8	-	41627	FALSE	Conditional Ready	Promotorless	EUCOMM	PCS00032_A_C04	PG00032_A_1_C04 PG00032_A_2_C04 PG00032_A_3_C04 PG00032_A_4_C04 PGS00032_A_C04	L1L2_gt1	1	5
MGI:1352464	Nr1h4	10	-	41590	FALSE	Conditional Ready	Promotorless	EUCOMM	PCS00030_B_H01	PG00030_B_2_H01 PG00030_B_3_H01 PG00030_C_1_H01 PG00030_C_2_H01 PG00030_C_4_H01 PGS00030_B_H01 PGS00030_C_H01 PG00030_C_3_H01	L1L2_gt0	1	8
MGI:1346307	Nr1i3	1	+	41459	FALSE	Conditional Ready	Promotorless	EUCOMM	PCS00030_B_B04	PG00030_B_1_B04 PG00030_B_4_B04 PGS00030_B_B04	L1L2_gt1	1	3
MGI:1352465	Nr2c1	10	+	41532	FALSE	Conditional Ready	Promotorless	EUCOMM	PCS00029_A_H04	PG00029_A_2_H04 PG00029_A_4_H04 PGS00029_A_H04	L1L2_gt0	1	3
MGI:1352466	Nr2c2	6	+	42157	FALSE	Conditional Ready	Promotorless	EUCOMM	PCS00037_A_D03	PG00037_A_2_D03 PGS00037_A_D03	L1L2_gt0	1	2
MGI:1100526	Nr2e1	10	-	41228	FALSE	Conditional Ready	Promotorless	EUCOMM	PCS00030_B_B03	PG00030_A_1_B03 PG00030_B_4_B03 PG00030_C_2_B03 PG00030_C_3_B03 PG00030_C_4_B03 PGS00030_A_B03 PGS00030_C_B03 PG00030_C_1_B03 PGS00030_B_B03	L1L2_gt1	1	9
MGI:95824	Nr3c1	18	-	42503	FALSE	Conditional Ready	Promotorless	EUCOMM	PCS00037_A_H07	PG00037_A_3_H07 PGS00037_A_H07	L1L2_gt2	1	2
MGI:1346833	Nr5a1	2	-	42011	FALSE	Conditional Ready	Promotorless	EUCOMM	PCS00032_A_A08	PG00032_A_2_A08 PGS00032_A_A08	L1L2_gt1	1	2
MGI:1352459	Nr6a1	2	-	47175	FALSE	Conditional Ready	Promotorless	EUCOMM	PCS00063_A_G02 PCS00063_B_G02	PG00063_B_2_G02 PG00063_B_3_G02 PGS00063_A_G02 PG00063_B_4_G02 MOHFA50001_D_4_B06 MOHFA50001_D_2_B06 MOHFA50001_D_6_B06 MOHFA50001_D_7_B06 MOHFA50001_D_3_B06 MOHFA50001_D_8_B06 MOHFA50001_D_1_B06	L1L2_gt0	2	11
MGI:1332235	Nrf1	6	+	37300	FALSE	Conditional Ready	Promotorless	KOMP-CSD	PCS00023_E_F12	PG00023_C_3_F12 PG00023_C_4_F12 PG00023_C_1_F12 PGS00023_A_F12	L1L2_gt1	1	4
MGI:1098246	Nrg2	18	-	39396	TRUE	Conditional Ready	Promotorless	EUCOMM	PCS00044_A_C04	PG00044_A_6_C04 PG00044_A_7_C04 PG00044_A_8_C04 PGS00044_A_C04	L1L2_st1	1	4
MGI:1891884	Nrip2	6	+	45221	FALSE	Conditional Ready	Promotorless	KOMP-CSD	PCS00055_A_A02	PGS00055_B_A02 PG00055_A_8_A02 PG00055_A_3_A02 PG00055_A_4_A02 PG00055_A_7_A02 PG00055_A_5_A02 PGS00055_A_A02	L1L2_gt0	1	7
MGI:1341864	Nsmaf	4	-	44419	FALSE	Conditional Ready	Promotorless	EUCOMM	PCS00054_B_E07	PG00054_A_1_E07 PG00054_A_2_E07 PG00054_A_3_E07 PGS00054_A_E07	L1L2_gt2	1	4
MGI:1861755	Nsmf	2	+	34144	FALSE	Conditional Ready	Promotorless	KOMP-CSD	PCS00020_A_F05	PGS00020_A_F05 PG00020_A_2_F05 PG00020_A_4_E05 PG00020_A_3_E05 PG00020_A_4_F05 PG00020_A_2_E05	L1L2_gt1	1	6
MGI:107252	Nsun2	13	+	42933	TRUE	Conditional Ready	Promotorless	EUCOMM	PCS00063_A_C01	PG00063_B_1_C01 PG00063_B_4_C01 PGS00063_A_C01	L1L2_gt0	1	3
MGI:2140844	Nsun5	5	+	47285	FALSE	Conditional Ready	Promotorless	EUCOMM	PCS00063_A_C05	PG00063_B_3_C05 PG00063_B_4_C05 PGS00063_A_C05	L1L2_gt0	1	3
MGI:1927186	Nt5c3	6	-	43034	FALSE	Conditional Ready	Promotorless	EUCOMM	PCS00050_A_B12	PG00050_A_2_B12 PG00050_A_4_B12 PG00050_A_5_B12 PG00050_A_7_B12 PG00050_A_8_B12 PGS00050_A_B12	L1L2_st0	1	6
MGI:1915356	Nt5c3b	11	-	348	FALSE	Conditional Ready	Promotorless	EUCOMM	PCS00017_A_C02	PG00017_B_2_C02 PG00017_B_3_C02 PGS00017_A_C02 PG00017_B_1_C02	L1L2_gt0	1	4
MGI:97385	Ntrk3	7	-	40434	FALSE	Conditional Ready	Promotorless	EUCOMM	PCS00030_B_H09	PG00030_A_4_H09 PG00030_B_1_H09 PG00030_C_1_F08 PG00030_C_3_H09 PG00030_C_4_H09 PGS00030_A_H09 PGS00030_B_H09 PGS00030_C_H09 PG00030_C_2_H09	L1L2_st2 L1L2_st1	1	9
MGI:1347073	Nubp1	16	+	44117	FALSE	Conditional Ready	Promotorless	EUCOMM	PCS00051_A_A08	PG00051_A_1_A08 PGS00051_A_A08	L1L2_gt1	1	2
MGI:1913651	Nudt2	4	+	46370	FALSE	Conditional Ready	Promotorless	EUCOMM	PCS00060_A_B05	PG00060_A_1_B05 PG00060_A_1_C05 PG00060_A_2_B05 PG00060_A_2_C05 PG00060_A_3_B05 PG00060_A_4_B05 PG00060_A_4_C05 PGS00060_A_B05 PG00060_A_3_C05	L1L2_gt0	1	9
MGI:1858232	Nudt5	2	+	39232	FALSE	Conditional Ready	Promotorless	EUCOMM	PCS00042_A_G01	PG00042_A_1_H01 PG00042_A_3_H01 PGS00042_A_G01	L1L2_gt0	1	3
MGI:2675669	Nusap1	2	+	34930	FALSE	Conditional Ready	Promotorless	KOMP-CSD	PCS00023_E_G06	PG00023_E_4_G06 PGS00023_E_G06	L1L2_gt0	1	2
MGI:109331	Nxn	11	-	345	FALSE	Conditional Ready	Promotorless	EUCOMM	PCS00007_A_B02 PCS00017_A_B02	PG00007_B_1_B02 PG00007_B_2_B02 PG00007_B_3_B02 PG00007_B_4_B02 PGS00007_A_B02 PG00017_B_2_B02 PGS00017_A_B02	L1L2_gt0	2	7
MGI:109331	Nxn	11	-	40358	FALSE	Conditional Ready	Promotorless	EUCOMM	PCS00030_B_D08	PG00030_B_2_D08 PG00030_C_1_D08 PGS00030_B_D08 PGS00030_C_D08 PG00030_B_4_D08	L1L2_gt2	1	5
MGI:2443880	Nyap1	5	-	45130	FALSE	Conditional Ready	Promotorless	KOMP-CSD	PCS00055_A_C03	PGS00055_A_C03 PGS00055_B_C03 PG00055_A_2_C03 PG00055_A_4_C03	L1L2_gt1	1	4
MGI:2443135	Nyap2	1	+	45058	FALSE	Conditional Ready	Promotorless	KOMP-CSD	PCS00055_A_G04	PGS00055_B_G04 PGS00055_A_G04 PG00055_A_1_G04	L1L2_gt2	1	3
MGI:2140770	Oas1d	5	+	43841	FALSE	Conditional Ready	Promotorless	EUCOMM	PCS00051_A_E09	PG00051_A_1_D09 PG00051_A_1_E09 PG00051_A_2_D05 PG00051_A_2_E09 PG00051_A_3_D09 PG00051_A_3_E09 PG00051_A_4_D05 PG00051_A_4_D09 PG00051_A_4_E09 PGS00051_A_E09 PG00051_A_2_D09	L1L2_gt1	1	11
MGI:3651927	Obp2b	2	+	44141	TRUE	Conditional Ready	Promotorless	KOMP-CSD	PCS00048_A_B10	PG00048_A_1_B10 PGS00048_A_B10	L1L2_gt0	1	2
MGI:2681862	Obscn	11	-	37865	FALSE	Conditional Ready	Promotorless	KOMP-CSD	PCS00027_A_H07	PG00027_B_1_H06 PGS00027_A_H07	L1L2_st2 L1L2_gt2	1	2
MGI:1313269	Oc90	15	-	42914	FALSE	Conditional Ready	Promotorless	KOMP-CSD	PCS00049_A_B11	PGS00049_A_B11 PG00049_A_8_B11 PG00049_A_4_B11 PGS00049_B_B11 PG00049_A_1_B11	L1L2_st1	1	5
MGI:97454	Oca2	7	+	44307	FALSE	Conditional Ready	Promotorless	KOMP-CSD	PCS00055_A_E06	PG00055_A_1_E06 PG00055_A_4_E06 PGS00055_A_E06 PGS00055_B_E06 PG00055_A_7_E06	L1L2_gt0	1	5
MGI:1921864	Ocstamp	2	-	35591	FALSE	Conditional Ready	Promotorless	KOMP-CSD	PCS00020_A_B12	PGS00020_A_B12 PG00020_A_2_B12 PG00020_A_4_B12	L1L2_gt2	1	3
MGI:1350328	Ofd1	X	-	40746	FALSE	Conditional Ready	Promotorless	EUCOMM	PCS00063_A_B01	PG00063_B_4_B01 PGS00063_A_B01	L1L2_gt0	1	2
MGI:2442978	Ogfod1	8	+	42340	FALSE	Conditional Ready	Promotorless	KOMP-CSD	PCS00036_A_F07	PGS00036_A_F07 PG00036_A_2_F07 PG00036_A_3_F07 PG00036_A_1_F07 PG00036_A_4_F07	L1L2_gt2	1	5
MGI:2139018	Olah	2	-	33877	FALSE	Conditional Ready	Promotorless	KOMP-CSD	PCS00049_A_B04	PGS00049_A_B04 PG00049_A_2_B04 PG00049_A_1_B04 PGS00049_B_B04 PG00049_A_8_B04	L1L2_gt1	1	5
MGI:2444741	Olfml2a	2	+	39298	FALSE	Conditional Ready	Promotorless	EUCOMM	PCS00042_A_B09	PG00042_A_1_B09 PG00042_A_2_B09 PG00042_A_4_B09 PGS00042_A_B09	L1L2_st0	1	4
MGI:1914263	Oma1	4	+	36459	FALSE	Conditional Ready	Promotorless	KOMP-CSD	PCS00027_A_E07	PGS00027_A_E07 PG00027_B_3_E07 PG00027_B_4_E06 PG00027_B_1_E06 PG00027_B_1_E07 PG00027_B_2_E07 PG00027_B_4_E07 PG00027_B_3_E06	L1L2_gt2	1	8
MGI:97397	Opcml	9	+	42722	FALSE	Conditional Ready	Promotorless	KOMP-CSD	PCS00049_A_F12	PG00049_A_4_F12 PGS00049_B_F12	L1L2_st2	1	2
MGI:2151070	Ophn1	X	-	41085	FALSE	Conditional Ready	Promotorless	KOMP-CSD	PCS00027_A_D06	PG00027_B_3_D06 PG00027_B_4_C05 PG00027_B_2_D06 PG00027_B_4_D06 PGS00027_A_D06	L1L2_gt1 L1L2_st1	1	5
MGI:1338022	Opn3	1	-	40432	FALSE	Conditional Ready	Promotorless	EUCOMM	PCS00030_B_E03	PG00030_B_3_E03 PG00030_B_4_E03 PG00030_C_1_E03 PGS00030_B_E03 PGS00030_C_E03 PG00030_B_2_E03	L1L2_gt1	1	6
MGI:2151113	Optc	1	-	45201	TRUE	Conditional Ready	Promotorless	KOMP-CSD	PCS00055_A_B09	PGS00055_A_B09 PGS00055_B_B09 PG00055_A_2_B09 PG00055_A_5_B09 PG00055_A_3_B09 PG00055_A_6_B09 PG00055_A_4_B09 PG00055_A_1_B09	L1L2_st0	1	8
MGI:1919534	Oraov1	7	+	44449	FALSE	Conditional Ready	Promotorless	EUCOMM	PCS00054_B_E09	PG00054_A_1_E09 PGS00054_A_E09	L1L2_gt2	1	2
MGI:1328337	Orc1	4	+	36556	FALSE	Conditional Ready	Promotorless	KOMP-CSD	PCS00023_E_F11	PG00023_D_4_F11 PG00023_E_1_F11 PG00023_E_4_F11 PG00023_E_3_F11 PGS00023_E_F11 PG00023_D_2_F11 PGS00023_A_F11 PG00023_D_3_F11	L1L2_gt1	1	8
MGI:1347043	Orc4	2	-	34342	FALSE	Conditional Ready	Promotorless	EUCOMM	PCS00050_A_A01	PG00050_A_2_A01 PG00050_A_4_A01 PG00050_A_7_A01 PGS00050_A_A01	L1L2_gt0	1	4
MGI:1347044	Orc5	5	-	40366	TRUE	Conditional Ready	Promotorless	EUCOMM	PCS00029_A_H01	PG00029_A_3_H01 PGS00029_A_H01	L1L2_gt0	1	2
MGI:1921559	Osbp2	11	-	202	FALSE	Conditional Ready	Promotorless	EUCOMM	PCS00004_A_E10	PG00004_A_1_E10 PG00004_A_2_E10 PG00004_A_3_E10 PG00004_A_4_E10 PGS00004_A_E10	L1L2_gt0	1	5
MGI:1918970	Osbpl3	6	-	43446	FALSE	Conditional Ready	Promotorless	EUCOMM	PCS00050_A_G02	PG00050_A_1_G02 PG00050_A_2_G02 PG00050_A_3_G02 PG00050_A_5_G02 PG00050_A_6_G02 PG00050_A_8_G02 PGS00050_A_G02 PG00050_A_4_G02 PG00050_A_7_G02	L1L2_gt0	1	9
MGI:2139014	Osbpl6	2	+	39335	FALSE	Conditional Ready	Promotorless	EUCOMM	PCS00042_A_A01	PG00042_A_2_A01 PG00042_A_3_A01 PG00042_A_4_A01 PGS00042_A_A01	L1L2_gt0	1	4
MGI:1923784	Osbpl9	4	-	36562	FALSE	Conditional Ready	Promotorless	KOMP-CSD	PCS00023_E_A04	PG00023_E_1_A04 PG00023_E_2_A04 PG00023_E_4_A04 PGS00023_E_A04 PG00023_E_3_A04	L1L2_gt0	1	5
MGI:97448	Otc	X	+	40781	FALSE	Conditional Ready	Promotorless	KOMP-CSD	PCS00027_A_D08	PG00027_B_1_D08 PGS00027_A_D08	L1L2_gt2	1	2
MGI:1891247	Otof	5	-	44925	FALSE	Conditional Ready	Promotorless	KOMP-CSD	PCS00052_A_D07	PG00052_A_5_D07 PG00052_A_6_D07 PGS00052_A_D07 PG00052_A_8_D07	L1L2_gt0	1	4
MGI:2388365	Otop2	11	+	148	FALSE	Conditional Ready	Promotorless	EUCOMM	PCS00005_A_D01 PCS00035_A_D01	PG00005_A_1_D01 PG00005_A_2_D01 PG00005_A_3_D01 PG00005_A_4_D01 PGS00005_A_D01 PG00035_A_1_D02 PG00035_A_2_D02 PGS00035_A_D01	L1L2_gt1	2	8
MGI:1920412	Otud3	4	-	532	FALSE	Conditional Ready	Promotorless	EUCOMM	PCS00006_A_H04 PCS00016_A_H04	PG00006_A_1_F12 PG00006_A_2_F12 PG00006_A_2_H04 PG00006_A_3_F12 PG00006_A_3_H04 PG00006_A_4_F12 PG00006_A_4_H04 PGS00006_A_F12 PGS00006_A_H04 PG00016_B_3_H04 PG00016_B_4_H04 PGS00016_A_H04 PG00006_A_1_H04 PG00016_B_4_H03	L1L2_gt2	2	14
MGI:1919451	Otud6b	4	-	35854	FALSE	Conditional Ready	Promotorless	EUCOMM	PCS00021_A_H02	PG00021_A_1_H01 PG00021_A_1_H02 PG00021_A_2_H02 PG00021_B_3_H02 PGS00021_A_H02 PGS00021_B_H02 PG00021_B_4_H02	L1L2_gt0 L1L2_st0	1	7
MGI:3045251	Ovch2	7	-	42127	FALSE	Conditional Ready	Promotorless	KOMP-CSD	PCS00036_A_A03	PG00036_A_1_A03 PGS00036_A_A03 PG00036_A_3_A03	L1L2_gt0	1	3
MGI:1338039	Ovol2	2	-	33715	TRUE	Conditional Ready	Promotorless	EUCOMM	PCS00040_A_B02	PG00040_A_3_B02 PGS00040_A_B02	L1L2_gt0	1	2
MGI:1914291	Oxct1	15	+	43054	FALSE	Conditional Ready	Promotorless	KOMP-CSD	PCS00041_A_A02	PG00041_A_1_A02 PGS00041_A_A02	L1L2_gt0	1	2
MGI:1338859	P2rx4	5	+	40299	FALSE	Conditional Ready	Promotorless	EUCOMM	PCS00030_B_E10	PG00030_C_1_E10 PG00030_C_3_E10 PGS00030_C_E10	L1L2_gt2	1	3
MGI:894684	Pa2g4	10	-	43144	FALSE	Conditional Ready	Promotorless	EUCOMM	PCS00046_A_A07	PLNS50001_D_B12 MOHFA50001_D_7_E03 MOHFA50001_D_4_E03 MOHFA50001_D_5_E03 MOHFA50001_D_6_E03 PG00046_A_2_A07 PG00046_A_3_A07 PG00046_A_4_A07 PGS00046_A_A07 PG00046_A_1_A07	L1L2_gt1	1	10
MGI:2385206	Pabpc4	4	+	36686	FALSE	Conditional Ready	Promotorless	KOMP-CSD	PCS00023_E_G04	PG00023_D_2_G04 PG00023_E_2_G04 PG00023_C_4_G04 PG00023_C_3_G04 PGS00023_E_G04 PG00023_D_4_G04 PG00023_E_3_G04 PG00023_D_1_G04 PG00023_D_3_G04 PG00023_E_4_G04 PGS00023_A_G04	L1L2_gt0	1	11
MGI:1338893	Padi1	4	-	563	FALSE	Conditional Ready	Promotorless	EUCOMM	PCS00006_A_H11 PCS00016_A_H11	PG00006_A_1_G06 PGS00006_A_G06 PG00016_B_1_H11 PG00016_B_1_H12 PG00016_B_2_H12 PG00016_B_3_H11 PG00016_B_3_H12 PG00016_B_4_H11 PG00016_B_4_H12 PGS00016_A_H11 PG00006_A_3_G06	L1L2_gt2	2	11
MGI:1338898	Padi4	4	-	560	FALSE	Conditional Ready	Promotorless	EUCOMM	PCS00016_A_H10 PCS00006_A_H10	PG00016_B_1_H10 PG00016_B_2_H10 PG00016_B_3_H10 PG00016_B_4_H10 PGS00016_A_H10 PG00006_A_3_H10 PG00006_A_4_H10 PG00006_A_2_H10 PG00006_A_1_H10 PGS00006_A_H10	L1L2_gt2	2	10
MGI:2140321	Pafah2	4	+	44510	FALSE	Conditional Ready	Promotorless	EUCOMM	PCS00050_A_E05	PG00050_A_2_E05 PG00050_A_4_E05 PG00050_A_5_E05 PG00050_A_8_E05 PGS00050_A_E05	L1L2_gt0	1	5
MGI:2679683	Paqr3	5	-	42465	FALSE	Conditional Ready	Promotorless	KOMP-CSD	PCS00036_A_C11	PG00036_A_2_C11 PG00036_A_1_C11 PGS00036_A_C11	L1L2_gt2	1	3
MGI:1277152	Parl	16	-	43824	FALSE	Conditional Ready	Promotorless	EUCOMM	PCS00047_A_C10	PG00047_A_2_C10 PGS00047_A_C10	L1L2_gt0	1	2
MGI:2143990	Parp12	6	-	41901	FALSE	Conditional Ready	Promotorless	KOMP-CSD	PCS00031_A_D03	PG00031_A_1_D03 PGS00031_A_D03	L1L2_gt0	1	2
MGI:1931144	Parva	7	+	43115	FALSE	Conditional Ready	Promotorless	EUCOMM	PCS00046_A_E02	PG00046_A_1_E02 PG00046_A_3_E02 PGS00046_A_E02 PG00046_A_4_E02	L1L2_gt0	1	4
MGI:2153063	Parvb	15	+	44569	FALSE	Conditional Ready	Promotorless	EUCOMM	PCS00050_A_B06	PG00050_A_1_B06 PG00050_A_2_B06 PG00050_A_3_B06 PG00050_A_4_B06 PG00050_A_5_B06 PG00050_A_7_B06 PG00050_A_8_B06 PGS00050_A_B06	L1L2_gt0	1	8
MGI:97490	Pax6	2	+	119340	FALSE	Conditional Ready	Promotorless	EUCOMM	PCS04006_A_D06	PLBS60002_B_D04	pL1L2_GT1_DelLacZ_bsd	1	1
MGI:1914617	Paxbp1	16	-	44128	FALSE	Conditional Ready	Promotorless	EUCOMM	PCS00063_A_E01	PG00063_B_4_F01 PGS00063_A_E01	L1L2_gt0	1	2
MGI:1923998	Pbrm1	14	+	42397	FALSE	Conditional Ready	Promotorless	EUCOMM	PCS00037_A_C01	PG00037_A_1_C01 PG00037_A_4_C01 PGS00037_A_C01	L1L2_gt0	1	3
MGI:1860484	Pbsn	X	-	44319	FALSE	Conditional Ready	Promotorless	KOMP-CSD	PCS00049_A_E11	PGS00049_B_E11 PG00049_A_2_E11	L1L2_st2	1	2
MGI:1916837	Pcgf3	5	+	39858	TRUE	Conditional Ready	Promotorless	EUCOMM	PCS00019_A_D05	PG00019_A_4_D05 PGS00019_A_D05	L1L2_gt1	1	2
MGI:97511	Pcsk1	13	+	44480	FALSE	Conditional Ready	Promotorless	EUCOMM	PCS00050_A_C11	PG00050_A_5_C11 PG00050_A_8_C11 PGS00050_A_C11 PG00050_A_7_C11	L1L2_st0	1	4
MGI:97512	Pcsk2	2	+	28831	FALSE	Conditional Ready	Promotorless	EUCOMM	PCS00008_A_G02	PG00008_A_1_G02 PG00008_A_3_G02 PGS00008_A_G02 PG00008_A_4_G02	L1L2_gt0	1	4
MGI:2140260	Pcsk9	4	-	39136	TRUE	Conditional Ready	Promotorless	EUCOMM	PCS00042_A_B10	PG00042_A_4_B10 PGS00042_A_B10	L1L2_st0	1	2
MGI:88557	Pcyt1a	16	+	44172	FALSE	Conditional Ready	Promotorless	EUCOMM	PCS00050_A_C04	PG00050_A_2_C04 PG00050_A_3_C04 PG00050_A_4_C04 PG00050_A_5_C04 PG00050_A_7_C04 PG00050_A_8_C04 PGS00050_A_C04 PG00050_A_1_C04 PG00050_A_6_C04	L1L2_gt0	1	9
MGI:1914716	Pdcl	2	-	26839	FALSE	Conditional Ready	Promotorless	EUCOMM	PCS00008_A_E11	PG00008_A_3_E11	L1L2_gt1	1	1
MGI:2387178	Pddc1	7	-	39558	FALSE	Conditional Ready	Promotorless	EUCOMM	PCS00044_A_F05	PG00044_A_6_F05 PG00044_A_7_F05 PG00044_A_8_F05 PGS00044_A_F05	L1L2_gt1	1	4
MGI:1345143	Pde10a	17	+	40541	TRUE	Conditional Ready	Promotorless	EUCOMM	PCS00030_B_A02	PG00030_B_2_A02 PG00030_B_4_A02 PG00030_C_1_A02 PG00030_C_2_A02 PG00030_C_3_A02 PG00030_C_3_B01 PG00030_C_4_A02 PGS00030_C_A02 PGS00030_B_A02	L1L2_gt0	1	9
MGI:3036251	Pde11a	2	-	39416	FALSE	Conditional Ready	Promotorless	EUCOMM	PCS00011_A_E05 PCS00043_A_E05	PGS00011_A_E05 PG00043_A_2_E05 PGS00043_A_E05 PG00011_A_3_F06 PG00011_A_3_F05	L1L2_gt0 L1L2_gt1	2	5
MGI:1201792	Pde1a	2	-	39347	FALSE	Conditional Ready	Promotorless	EUCOMM	PCS00026_B_E10	PG00026_A_2_E10 PG00026_A_3_E10 PG00026_A_4_E10 PG00026_B_1_E10 PGS00026_A_E10 PGS00026_B_E10 PG00026_A_1_E10	L1L2_gt2	1	7
MGI:97525	Pde6b	5	+	44764	FALSE	Conditional Ready	Promotorless	KOMP-CSD	PCS00052_A_D01	PG00052_A_5_D01 PG00052_A_8_D01 PGS00052_A_D01 PG00052_A_2_D01	L1L2_gt0	1	4
MGI:97526	Pde6g	11	-	46984	FALSE	Conditional Ready	Promotorless	EUCOMM	PCS00064_A_B04	PG00064_A_1_B04 PG00064_A_3_B04 PG00064_A_4_B04 PGS00064_A_B04	L1L2_gt0	1	4
MGI:1925850	Pde6h	6	+	43515	FALSE	Conditional Ready	Promotorless	EUCOMM	PCS00047_A_F09	PG00047_A_1_F09 PG00047_A_2_F09 PGS00047_A_F09	L1L2_gt0	1	3
MGI:97527	Pdgfa	5	-	43591	FALSE	Conditional Ready	Promotorless	EUCOMM	PCS00050_A_F11	PG00050_A_2_F11 PG00050_A_4_F11 PG00050_A_6_F11 PG00050_A_8_F11 PGS00050_A_F11	L1L2_st0	1	5
MGI:1859631	Pdgfc	3	+	46906	FALSE	Conditional Ready	Promotorless	EUCOMM	PCS00064_A_G10	PG00064_A_3_G10 PG00064_A_4_G10 PGS00064_A_G10 PG00064_A_1_G10	L1L2_st1	1	4
MGI:97532	Pdha1	X	-	40604	FALSE	Conditional Ready	Promotorless	EUCOMM	PCS00030_B_B01	PG00030_B_1_B01 PG00030_C_4_B01 PGS00030_B_B01 PGS00030_C_B01	L1L2_gt0	1	4
MGI:2385213	Pdik1l	4	-	39220	FALSE	Conditional Ready	Promotorless	EUCOMM	PCS00011_A_A10 PCS00043_A_A10	PG00011_A_1_A08 PG00011_A_3_A10 PG00011_A_4_C08 PGS00011_A_A10 PG00043_A_4_A10 PGS00043_A_A10 PG00011_A_1_B09	L1L2_gt1	2	7
MGI:1926119	Pdk1	2	+	27384	FALSE	Conditional Ready	Promotorless	EUCOMM	PCS00008_A_B12	PG00008_A_2_B12 PG00008_A_1_B12	L1L2_gt1	1	2
MGI:2384308	Pdk3	X	-	41121	FALSE	Conditional Ready	Promotorless	KOMP-CSD	PCS00028_A_D10	PGS00028_A_D10 PG00028_B_3_D10	L1L2_gt1	1	2
MGI:1353470	Pdlim4	11	-	37806	TRUE	Conditional Ready	Promotorless	KOMP-CSD	PCS00020_A_C12	PLB60002_B_1_G10 PLB60002_B_4_G10 PLBS60002_B_B05 PLB60002_B_3_G10 PGS00020_A_C12	pL1L2_GT2_DelLacZ_bsd L1L2_gt2	1	5
MGI:2140945	Pds5b	5	+	39686	FALSE	Conditional Ready	Promotorless	EUCOMM	PCS00019_A_C08	PG00019_A_1_C08 PG00019_A_3_C08 PG00019_A_4_C08 PGS00019_A_C08 PG00019_A_2_C08	L1L2_gt1	1	5
MGI:1920909	Pdxdc1	16	-	43372	FALSE	Conditional Ready	Promotorless	EUCOMM	PCS00054_B_C04	PG00054_A_1_C04 PG00054_A_3_C04 PGS00054_A_C04 PG00054_A_2_C04	L1L2_gt2	1	4
MGI:1914432	Pdzk1ip1	4	+	36612	FALSE	Conditional Ready	Promotorless	KOMP-CSD	PCS00020_A_C07	PG00020_A_3_C07 PG00020_A_2_C07 PGS00020_A_C07	L1L2_st1	1	3
MGI:1915148	Pef1	4	+	39164	FALSE	Conditional Ready	Promotorless	EUCOMM	PCS00042_A_F12	PG00042_A_2_F12 PG00042_A_3_F12 PGS00042_A_F12	L1L2_gt0	1	3
MGI:104535	Pemt	11	-	289	FALSE	Conditional Ready	Promotorless	EUCOMM	PCS00004_A_H07	PG00004_A_1_H07 PG00004_A_2_H07 PG00004_A_3_H07 PG00004_A_4_H07 PGS00004_A_H07	L1L2_gt0	1	5
MGI:1890613	Pes1	11	+	33760	FALSE	Conditional Ready	Promotorless	EUCOMM	PCS00040_A_H02	PG00040_A_1_H02 PGS00040_A_H02	L1L2_gt0	1	2
MGI:1918632	Pex1	5	+	46430	FALSE	Conditional Ready	Promotorless	EUCOMM	PCS00060_A_C04	PG00060_A_1_C04 PG00060_A_2_C04 PGS00060_A_C04	L1L2_gt0	1	3
MGI:2684988	Pex10	4	+	39217	FALSE	Conditional Ready	Promotorless	EUCOMM	PCS00043_A_D12	PG00043_A_3_D12 PGS00043_A_D12	L1L2_gt1	1	2
MGI:1338829	Pex16	2	+	39373	FALSE	Conditional Ready	Promotorless	EUCOMM	PCS00044_A_A08	PG00044_A_7_A08 PGS00044_A_A08 PG00044_A_6_A08	L1L2_gt1	1	3
MGI:1929646	Pex3	10	-	40041	TRUE	Conditional Ready	Promotorless	EUCOMM	PCS00030_B_B12	PG00030_B_3_B12 PG00030_C_1_B12 PG00030_C_2_B12 PG00030_C_3_B12 PGS00030_B_B12 PGS00030_C_B12 PG00030_C_4_B12	L1L2_gt2	1	7
MGI:2385054	Pex6	17	+	44758	FALSE	Conditional Ready	Promotorless	KOMP-CSD	PCS00052_A_C01	PG00052_A_7_C01 PG00052_A_7_C02 PG00052_A_8_C02 PG00052_A_3_C01 PG00052_A_5_C01 PG00052_A_8_C01 PGS00052_A_C01 PG00052_A_6_C01	L1L2_gt0	1	8
MGI:97547	Pfkl	10	-	44121	FALSE	Conditional Ready	Promotorless	EUCOMM	PCS00046_A_D07	PG00046_A_1_D07 PG00046_A_2_D07 PG00046_A_3_D07 PG00046_A_4_D07 PGS00046_A_D07	L1L2_gt1	1	5
MGI:97549	Pfn1	11	-	324	FALSE	Conditional Ready	Promotorless	EUCOMM	PCS00017_A_C01 PCS00007_A_C01	PG00017_B_2_C01 PG00017_B_3_C01 PGS00017_A_C01 PGS00007_A_C01	L1L2_gt0	2	4
MGI:1919792	Pgam5	5	-	44639	FALSE	Conditional Ready	Promotorless	EUCOMM	PCS00054_B_H12	PG00054_A_1_H12 PG00054_A_4_H12 PGS00054_A_H12	L1L2_st2	1	3
MGI:2444461	Pgap3	11	-	38448	FALSE	Conditional Ready	Promotorless	KOMP-CSD	PCS00020_A_B09	PGS00020_A_B09 PG00020_A_1_B09	L1L2_st1	1	2
MGI:97553	Pgd	4	-	46927	FALSE	Conditional Ready	Promotorless	EUCOMM	PCS00064_A_C01	PG00064_A_1_C01 PG00064_A_3_C01 PG00064_A_4_C01 PGS00064_A_C01 PG00064_A_2_C01	L1L2_gt0	1	5
MGI:2685266	Pglyrp3	3	+	45014	FALSE	Conditional Ready	Promotorless	KOMP-CSD	PCS00052_A_H10	PG00052_A_2_H10 PG00052_A_6_H10 PG00052_A_5_H10 PGS00052_A_H10	L1L2_st1	1	4
MGI:2686324	Pglyrp4	3	+	42554	FALSE	Conditional Ready	Promotorless	KOMP-CSD	PCS00049_A_C11	PG00049_A_1_C11 PGS00049_B_C11 PGS00049_A_C11 PG00049_A_8_C11	L1L2_st1	1	4
MGI:97565	Pgm2	4	+	41296	FALSE	Conditional Ready	Promotorless	KOMP-CSD	PCS00028_A_C01	PGS00028_A_C01 PG00028_B_2_C01 PG00028_B_3_C01 PG00028_B_1_C01	L1L2_gt0	1	4
MGI:97567	Pgr	9	+	42442	TRUE	Conditional Ready	Promotorless	EUCOMM	PCS00037_A_H10	PG00037_A_3_H10 PGS00037_A_H10	L1L2_gt2	1	2
MGI:2659021	Phactr1	13	+	44835	FALSE	Conditional Ready	Promotorless	KOMP-CSD	PCS00052_A_C04	PG00052_A_1_C04 PG00052_A_2_C04 PG00052_A_8_C04 PG00052_A_6_C04 PG00052_A_5_C04 PGS00052_A_C04	L1L2_gt1	1	6
MGI:2446138	Phactr2	10	-	40133	FALSE	Conditional Ready	Promotorless	EUCOMM	PCS00030_B_D06	PG00030_C_1_D06 PG00030_C_1_E05 PG00030_C_1_E06 PG00030_C_3_E05 PG00030_C_3_E06 PG00030_C_4_D06 PG00030_C_4_F04 PG00030_C_4_F05 PGS00030_C_D06 PG00030_C_2_E06	L1L2_gt1 L1L2_st1	1	10
MGI:2181434	Phc3	3	-	42170	FALSE	Conditional Ready	Promotorless	KOMP-CSD	PCS00036_A_D02	PGS00036_A_D02 PG00036_A_2_D02 PG00036_A_1_D02 PG00036_A_4_D02	L1L2_gt0	1	4
MGI:107489	Phex	X	-	41138	FALSE	Conditional Ready	Promotorless	KOMP-CSD	PCS00027_A_A04	PGS00027_A_A04 PG00027_B_1_A04 PG00027_B_3_A04 PG00027_B_2_A04 PG00027_B_4_A04	L1L2_st1	1	5
MGI:1921266	Phf19	2	-	39869	TRUE	Conditional Ready	Promotorless	EUCOMM	PCS00019_A_F09	PG00019_A_1_F09 PG00019_A_2_F09 PG00019_A_3_F09 PGS00019_A_F09	L1L2_gt1	1	4
MGI:2444148	Phf20	2	+	39870	FALSE	Conditional Ready	Promotorless	EUCOMM	PCS00019_A_D11	PG00019_A_3_D11 PG00019_A_4_D11 PGS00019_A_D11 PG00019_A_2_D11	L1L2_gt2	1	4
MGI:1918248	Phf6	X	+	40639	FALSE	Conditional Ready	Promotorless	EUCOMM	PCS00050_A_H08	PG00050_A_4_H08 PG00050_A_5_H08 PG00050_A_8_H08 PGS00050_A_H08 PG00050_A_3_H08	L1L2_gt2	1	5
MGI:2444341	Phf8	X	+	39873	FALSE	Conditional Ready	Promotorless	EUCOMM	MOHPC10006_A_E03 PCS00019_A_G12	MOHFA0006_B_5_E03 MOHFA0006_B_6_E03 MOHFAS5006_Z_E01 MOHFAS5006_Z_E02 PLBS60002_B_B09 PLB60002_B_4_H12 PLB60002_B_1_H12 PLNS50001_D_B01 MOHFA50001_D_5_G07 MOHFA50001_D_6_G07	L1L2_gt2_Del_LacZ pL1L2_GT2_DelLacZ_bsd L1L2_gt2	2	10
MGI:1355330	Phgdh	3	-	44754	FALSE	Conditional Ready	Promotorless	KOMP-CSD	PCS00052_A_B01	PG00052_A_5_B01 PGS00052_A_B01 PG00052_A_8_B01	L1L2_gt0	1	3
MGI:97576	Phka1	X	-	44354	FALSE	Conditional Ready	Promotorless	KOMP-CSD	PCS00049_A_C02	PG00049_A_1_C02 PG00049_A_4_C02 PG00049_A_5_C02 PG00049_A_8_C02 PGS00049_A_C02 PGS00049_B_C02	L1L2_gt0	1	6
MGI:97577	Phka2	X	+	40612	FALSE	Conditional Ready	Promotorless	EUCOMM	PCS00033_A_B08	PG00033_A_2_B08 PG00033_A_4_B08 PGS00033_A_B08	L1L2_gt0	1	3
MGI:97579	Phkg1	5	-	42513	FALSE	Conditional Ready	Promotorless	EUCOMM	PCS00038_A_B09	PG00038_A_2_B09 PG00038_A_2_C09 PG00038_A_4_B09 PG00038_A_4_C09 PGS00038_A_B09	L1L2_gt2	1	5
MGI:2444981	Phldb2	16	-	43128	TRUE	Conditional Ready	Promotorless	KOMP-CSD	PCS00055_A_D02	PGS00055_B_D02 PG00055_A_3_D02 PGS00055_A_D02 PG00055_A_8_D02 PG00055_A_7_D02 PG00055_A_5_D02 PG00055_A_1_D02 PG00055_A_6_D02 PG00055_A_2_D02	L1L2_gt1	1	9
MGI:1920197	Phykpl	11	+	265	FALSE	Conditional Ready	Promotorless	EUCOMM	PCS00006_A_E01	PG00006_A_2_D06 PG00006_A_3_D06 PG00006_A_4_D06 PGS00006_A_D06	L1L2_gt2	1	4
MGI:1334433	Pi4kb	3	+	41302	FALSE	Conditional Ready	Promotorless	EUCOMM	PCS00032_A_D03	PG00032_A_4_C03 PG00032_A_4_D03 PGS00032_A_D03 PG00032_A_2_D03	L1L2_gt0	1	4
MGI:2687325	Pigs	11	+	38134	FALSE	Conditional Ready	Promotorless	KOMP-CSD	PCS00021_A_H09	PGS00021_A_H09 PG00021_C_1_H09 PGS00021_B_H09	L1L2_gt1 L1L2_st1	1	3
MGI:3039607	Pigu	2	-	39500	FALSE	Conditional Ready	Promotorless	EUCOMM	PCS00044_A_A04	PGS00044_A_A04 PG00044_A_6_A04	L1L2_st1	1	2
MGI:3607720	Pih1h3b	X	+	40560	FALSE	Conditional Ready	Promotorless	EUCOMM	PCS00032_A_C12	PG00032_A_1_C12 PG00032_A_1_E11 PG00032_A_1_E12 PG00032_A_1_F06 PG00032_A_1_G11 PG00032_A_1_H07 PG00032_A_2_F07 PG00032_A_2_G11 PG00032_A_2_G12 PG00032_A_2_H07 PGS00032_A_C12 PG00032_A_1_G03 PG00032_A_1_H08 PG00032_A_2_H08 PG00032_A_1_G02	L1L2_gt0 L1L2_gt1 L1L2_st0 L1L2_gt2	1	15
MGI:2445019	Pik3c3	18	+	40166	TRUE	Conditional Ready	Promotorless	EUCOMM	PCS00030_B_H10	PG00030_C_3_H10 PG00030_C_4_H10 PGS00030_C_H10 PG00030_C_2_H10	L1L2_gt2	1	4
MGI:1922019	Pik3cb	9	-	40316	FALSE	Conditional Ready	Promotorless	EUCOMM	PCS00029_A_B05	PG00029_A_1_B05 PG00029_A_2_B05 PG00029_A_4_B05 PGS00029_A_B05	L1L2_gt0	1	4
MGI:2443588	Pik3r5	11	+	33810	FALSE	Conditional Ready	Promotorless	EUCOMM	PCS00043_A_H07	PG00043_A_1_H07 PGS00043_A_H07	L1L2_gt1	1	2
MGI:2144613	Pik3r6	11	+	317	FALSE	Conditional Ready	Promotorless	EUCOMM	PCS00005_A_G03	PG00005_A_1_G03 PG00005_A_2_G03 PG00005_A_4_G03 PGS00005_A_G03 PG00005_A_3_G03	L1L2_gt1	1	5
MGI:1298206	Pip4k2a	2	-	39273	FALSE	Conditional Ready	Promotorless	EUCOMM	PCS00042_A_H01	PG00042_A_1_G01 PG00042_A_2_G01 PG00042_A_3_G01 PG00042_A_4_G01 PGS00042_A_H01	L1L2_gt0	1	5
MGI:1197006	Pipox	11	-	5	FALSE	Conditional Ready	Promotorless	EUCOMM	PCS00004_A_A03	PG00004_A_4_A03 PGS00004_A_A03 PG00004_A_3_A03	L1L2_gt0	1	3
MGI:1197524	Pitpnm1	19	+	44617	FALSE	Conditional Ready	Promotorless	EUCOMM	PCS00050_A_A08	PG00050_A_3_A08 PG00050_A_6_A08 PG00050_A_7_A08 PG00050_A_8_A08 PGS00050_A_A08	L1L2_gt1	1	5
MGI:2156538	Pkd1l1	11	-	219	FALSE	Conditional Ready	Promotorless	EUCOMM	PCS00006_A_D09 PCS00016_A_D09	PG00006_A_3_D02 PG00006_A_4_D02 PGS00006_A_D02 PG00016_B_1_D09 PG00016_B_2_D09 PG00016_B_4_D09 PGS00016_A_D09	L1L2_gt2	2	7
MGI:108022	Pkn1	8	-	44436	FALSE	Conditional Ready	Promotorless	KOMP-CSD	PCS00049_A_A05	PG00049_A_3_A05 PGS00049_B_A05 PG00049_A_1_A05 PG00049_A_5_A05 PG00049_A_2_A05 PG00049_A_4_A05 PG00049_A_8_A05 PGS00049_A_A05	L1L2_gt1	1	8
MGI:1328359	Pkp1	1	-	41613	FALSE	Conditional Ready	Promotorless	KOMP-CSD	PCS00031_A_B06	PGS00031_A_B06 PG00031_B_4_B06	L1L2_gt1	1	2
MGI:109281	Pkp4	2	+	40241	FALSE	Conditional Ready	Promotorless	EUCOMM	PCS00030_B_B05	PG00030_B_2_B05 PG00030_B_4_B05 PG00030_C_2_B05 PG00030_C_3_B05 PG00030_C_4_B05 PGS00030_B_B05 PGS00030_C_B05 PG00030_C_1_B05	L1L2_gt1	1	8
MGI:101842	Pla2g1b	5	+	39386	FALSE	Conditional Ready	Promotorless	EUCOMM	PCS00044_A_B04	PG00044_A_8_B04 PGS00044_A_B04	L1L2_st1	1	2
MGI:106638	Pla2g2c	4	+	39188	FALSE	Conditional Ready	Promotorless	EUCOMM	PCS00011_A_A07 PCS00043_A_A07	PG00011_A_1_B04 PG00011_A_2_A07 PG00011_A_3_A07 PG00011_A_4_A07 PGS00011_A_A07 PG00043_A_1_A07 PG00043_A_2_A07 PG00043_A_3_A07 PG00043_A_4_A07 PGS00043_A_A07 PG00011_A_1_A07	L1L2_gt0 L1L2_gt1 L1L2_st1	2	11
MGI:1349661	Pla2g2f	4	-	41272	FALSE	Conditional Ready	Promotorless	KOMP-CSD	PCS00028_A_C12	PG00028_B_1_C12 PGS00028_A_C12	L1L2_gt2	1	2
MGI:1919144	Pla2g4e	2	-	39423	FALSE	Conditional Ready	Promotorless	EUCOMM	PCS00011_A_B04	PG00011_A_3_B04 PGS00011_A_B04	L1L2_gt0	1	2
MGI:101899	Pla2g5	4	-	39187	FALSE	Conditional Ready	Promotorless	EUCOMM	PCS00011_A_C07	PG00011_A_4_C07 PGS00011_A_C07	L1L2_gt1	1	2
MGI:2445289	Plac8	5	-	44611	FALSE	Conditional Ready	Promotorless	EUCOMM	PCS00051_A_B10	PG00051_A_2_B10 PG00051_A_2_G03 PG00051_A_3_G03 PGS00051_A_B10 PG00051_A_1_G03	L1L2_gt1	1	5
MGI:1922406	Plb1	5	+	42791	FALSE	Conditional Ready	Promotorless	EUCOMM	PCS00047_A_F11	PG00047_A_1_F11 PG00047_A_2_F11 PGS00047_A_F11	L1L2_st0	1	3
MGI:1914107	Plbd1	6	-	42765	FALSE	Conditional Ready	Promotorless	KOMP-CSD	PCS00041_A_F10	PG00041_A_1_F10 PGS00041_A_F10	L1L2_st2	1	2
MGI:97613	Plcb1	2	+	42685	FALSE	Conditional Ready	Promotorless	EUCOMM	PCS00037_A_A01	PG00037_A_2_A02 PG00037_A_3_A02 PG00037_A_4_A01 PGS00037_A_A01	L1L2_gt0	1	4
MGI:107464	Plcb4	2	+	39490	FALSE	Conditional Ready	Promotorless	EUCOMM	PCS00043_A_A01	PGS00043_A_A01 PG00043_A_2_A01	L1L2_gt0	1	2
MGI:2443078	Plch2	4	-	44246	FALSE	Conditional Ready	Promotorless	KOMP-CSD	PCS00048_A_E05	PG00048_A_3_E05 PG00048_A_4_E05 PG00048_A_2_E05 PGS00048_A_E05	L1L2_gt1	1	4
MGI:2150308	Plcz1	6	-	42202	FALSE	Conditional Ready	Promotorless	KOMP-CSD	PCS00036_A_H02	PGS00036_A_H02 PG00036_A_2_H02	L1L2_gt0	1	2
MGI:109585	Pld1	3	+	47048	FALSE	Conditional Ready	Promotorless	KOMP-CSD	PCS00064_A_B06	PG00064_A_2_B06 PGS00064_A_B06	L1L2_gt1	1	2
MGI:2442056	Pld5	1	-	42650	FALSE	Conditional Ready	Promotorless	KOMP-CSD	PCS00041_A_F04	PGS00041_A_F04 PG00041_A_4_F04 PG00041_A_1_F04 PG00041_A_2_F04 PG00041_A_3_F04	L1L2_gt0	1	5
MGI:2443207	Plekhm1	11	-	40171	FALSE	Conditional Ready	Promotorless	EUCOMM	PCS00029_A_A01	PG00029_A_1_A01 PG00029_A_2_A01 PG00029_A_4_A01 PGS00029_A_A01	L1L2_gt0	1	4
MGI:1916832	Plekhm2	4	-	44411	FALSE	Conditional Ready	Promotorless	EUCOMM	MOHPC10006_A_E06 PCS00051_A_E08	MOHFA0006_B_5_E06 MOHFA0006_B_8_E06 MOHFAS5006_Z_E03 MOHFAS5006_Z_E04 PG00051_A_3_D05 PGS00051_A_E08 PG00051_A_2_E08 PG00051_A_1_D05	L1L2_gt1_Del_LacZ L1L2_gt1	2	8
MGI:87920	Plin2	4	-	418	FALSE	Conditional Ready	Promotorless	EUCOMM	PCS00007_A_B10 PCS00017_A_B10	PGS00007_A_B10 PG00017_B_4_C10 PG00017_B_3_C10 PGS00017_A_B10 PG00017_B_2_C10	L1L2_gt1	2	5
MGI:99907	Plod1	4	-	44515	FALSE	Conditional Ready	Promotorless	EUCOMM	PCS00051_A_G11	PG00051_A_1_G11 PG00051_A_2_G11 PG00051_A_4_G11 PGS00051_A_G11	L1L2_st1	1	4
MGI:1915166	Plpp3	4	+	39134	FALSE	Conditional Ready	Promotorless	EUCOMM	PCS00043_A_G11	PGS00043_A_G11 PG00043_A_4_G11	L1L2_gt1	1	2
MGI:106530	Plppr4	3	-	42463	FALSE	Conditional Ready	Promotorless	KOMP-CSD	PCS00036_A_D06	PGS00036_A_D06 PG00036_A_3_D06 PG00036_A_4_D06	L1L2_gt1	1	3
MGI:893575	Plscr1	9	+	41741	FALSE	Conditional Ready	Promotorless	EUCOMM	PCS00033_A_F03	PG00033_A_2_F03 PG00033_A_2_G10 PG00033_A_3_F03 PG00033_A_4_F03 PG00033_A_4_G10 PGS00033_A_F03	L1L2_gt1	1	6
MGI:1270860	Plscr2	9	+	41869	TRUE	Conditional Ready	Promotorless	KOMP-CSD	PCS00031_A_B07	PG00031_A_15_B07 PG00031_B_2_B07 PG00031_B_1_B07 PGS00031_A_B07 PG00031_B_3_B07 PG00031_B_4_B07 PG00031_A_16_B07	L1L2_gt1	1	7
MGI:1919574	Plxdc1	11	-	109	FALSE	Conditional Ready	Promotorless	EUCOMM	PCS00005_A_C05	PG00005_A_1_C05 PG00005_A_2_C05 PG00005_A_3_C05 PGS00005_A_C05	L1L2_gt1	1	4
MGI:1914698	Plxdc2	2	+	39265	FALSE	Conditional Ready	Promotorless	EUCOMM	PCS00043_A_F12	PG00043_A_3_F12 PGS00043_A_F12	L1L2_st1	1	2
MGI:2179061	Plxna4	6	-	37345	FALSE	Conditional Ready	Promotorless	KOMP-CSD	PCS00021_A_A07	PG00021_C_3_A07 PGS00021_A_A07 PG00021_B_2_A07 PG00021_B_2_A08 PG00021_B_4_A07 PG00021_C_1_A08 PG00021_C_4_A07 PG00021_B_3_A08 PG00021_C_3_A08 PGS00021_B_A07	L1L2_st0 L1L2_gt0	1	10
MGI:2179061	Plxna4	6	-	40385	FALSE	Conditional Ready	Promotorless	KOMP-CSD	PCS00029_A_E04	PG00029_A_1_E04 PG00029_A_3_E04 PGS00029_A_E04 PG00029_A_2_E04	L1L2_st0	1	4
MGI:2154239	Plxnb2	15	-	40258	FALSE	Conditional Ready	Promotorless	EUCOMM	PCS00029_A_B04	PG00029_A_1_B04 PG00029_A_2_B04 PG00029_A_3_B04 PG00029_A_4_B04 PGS00029_A_B04	L1L2_st1	1	5
MGI:2144151	Pnpo	11	-	41209	TRUE	Conditional Ready	Promotorless	KOMP-CSD	PCS00027_A_F03	PG00027_B_2_F03 PG00027_B_3_F03 PG00027_B_4_F03 PGS00027_A_F03 PG00027_B_1_F03	L1L2_gt0	1	5
MGI:1918951	Pnpt1	11	+	37613	FALSE	Conditional Ready	Promotorless	KOMP-CSD	PCS00020_A_C11	PGS00020_A_C11 PG00020_A_1_C11 PG00020_A_4_C11	L1L2_gt1	1	3
MGI:2674939	Podn	4	-	36523	FALSE	Conditional Ready	Promotorless	KOMP-CSD	PCS00021_A_H06	PGS00021_B_H06 PG00021_C_3_H06 PG00021_C_1_H06 PGS00021_A_H06 PG00021_B_4_H06 PG00021_C_2_H06 PG00021_C_4_H06	L1L2_st0 L1L2_gt0	1	7
MGI:2153207	Pofut1	2	+	35374	TRUE	Conditional Ready	Promotorless	KOMP-CSD	PCS00021_A_F09	PGS00021_B_F09 PGS00021_A_F09 PG00021_B_3_F09	L1L2_st0 L1L2_gt0	1	3
MGI:97741	Pold1	7	-	47030	FALSE	Conditional Ready	Promotorless	EUCOMM	PCS00064_A_H05	PG00064_A_1_H05 PG00064_A_3_H05 PGS00064_A_H05	L1L2_gt1	1	3
MGI:1915061	Poldip2	11	+	6	FALSE	Conditional Ready	Promotorless	EUCOMM	PCS00006_A_A01	PG00006_A_3_A01 PGS00006_A_A01	L1L2_gt2	1	2
MGI:1929022	Polr1e	4	+	36033	FALSE	Conditional Ready	Promotorless	KOMP-CSD	PCS00028_A_F02	PG00028_B_3_F02 PG00028_B_4_F02 PG00028_B_2_F02 PGS00028_A_F02 PG00028_B_1_F02	L1L2_gt0	1	5
MGI:1914255	Polr3k	2	+	46909	FALSE	Conditional Ready	Promotorless	EUCOMM	PCS00064_A_H03	PG00064_A_1_H03 PG00064_A_3_H03 PG00064_A_4_H03 PGS00064_A_H03	L1L2_gt0	1	4
MGI:1930150	Popdc2	16	+	43542	FALSE	Conditional Ready	Promotorless	EUCOMM	PCS00054_B_D10	PG00054_A_4_D11	L1L2_st2	1	1
MGI:101893	Pou5f1	17	+	281669	FALSE	Conditional Ready	Promotorless	EUCOMM	MOHPC10006_A_E08	MOHFA0006_A_4_E08 MOHFA0006_A_6_E08 MOHFA0006_A_7_E08 MOHFA0006_B_1_E08 MOHFA0006_B_2_E08 MOHFA0006_B_3_E08 MOHFA0006_B_4_E08 MOHFA0006_B_5_E08 MOHFA0006_B_6_E08 MOHFA0006_B_7_E08 MOHFA0006_B_8_E08 MOHFAS5006_Z_E06 MOHFA0006_A_1_E08 MOHFA0006_A_3_E08 MOHFAS5006_Z_E05	L1L2_gt0_Del_LacZ	1	15
MGI:1342774	Ppargc1a	5	-	42168	FALSE	Conditional Ready	Promotorless	EUCOMM	PCS00037_A_E02	PG00037_A_1_E02 PG00037_A_2_G03 PGS00037_A_E02	L1L2_gt0	1	3
MGI:2444934	Ppargc1b	18	-	42617	FALSE	Conditional Ready	Promotorless	EUCOMM	PCS00037_A_B04	PG00037_A_1_B04 PG00037_A_3_B04 PG00037_A_4_B04 PGS00037_A_B04	L1L2_gt0	1	4
MGI:1924037	Ppfia3	7	-	42352	FALSE	Conditional Ready	Promotorless	EUCOMM	PCS00038_A_H01	PG00038_A_3_H01 PG00038_A_4_H01 PGS00038_A_H01	L1L2_gt0	1	3
MGI:1914783	Ppfibp1	6	+	43099	FALSE	Conditional Ready	Promotorless	EUCOMM	PCS00050_A_H01	PG00050_A_2_H01 PG00050_A_4_H01 PG00050_A_6_H01 PGS00050_A_H01	L1L2_gt0	1	4
MGI:2145814	Ppif	14	+	47185	FALSE	Conditional Ready	Promotorless	EUCOMM	PCS00063_A_H04	PG00063_B_1_H04 PG00063_B_2_H03 PG00063_B_2_H04 PG00063_B_3_H04 PG00063_B_4_H04 PGS00063_A_H04	L1L2_gt0	1	6
MGI:106499	Ppih	4	-	494	FALSE	Conditional Ready	Promotorless	EUCOMM	PCS00006_A_G08 PCS00016_A_G08	PG00006_A_2_G08 PG00006_A_3_F06 PG00006_A_4_F06 PGS00006_A_F06 PGS00006_A_G08 PG00016_B_1_H07 PG00016_B_2_G08 PG00016_B_2_H07 PG00016_B_3_G08 PG00016_B_4_G08 PG00016_B_4_H07 PGS00016_A_G08 PG00006_A_1_F06 PG00016_B_3_H07	L1L2_gt2	2	14
MGI:2444096	Ppm1e	11	-	57	TRUE	Conditional Ready	Promotorless	EUCOMM	PCS00006_A_B02	PG00006_A_3_B02 PG00006_A_4_B02 PGS00006_A_B02	L1L2_gt2	1	3
MGI:1918464	Ppm1f	16	+	42230	FALSE	Conditional Ready	Promotorless	EUCOMM	PCS00037_A_E05	PG00037_A_2_E05 PG00037_A_3_E05 PG00037_A_4_E05 PGS00037_A_E05	L1L2_gt1	1	4
MGI:2442660	Ppp2r2c	5	+	41635	FALSE	Conditional Ready	Promotorless	KOMP-CSD	PCS00031_A_F03	PG00031_B_1_F03 PG00031_B_2_F03 PG00031_A_14_F03 PG00031_B_3_F03 PGS00031_A_F03 PG00031_A_16_F03 PG00031_B_4_F03	L1L2_gt0	1	7
MGI:1349475	Ppp2r5c	12	+	256213	FALSE	Conditional Ready	Promotorless	EUCOMM	MOHPC10006_A_E10	MOHFA0006_A_6_E10 MOHFAS5006_Z_E08 MOHFA0006_A_5_E10 MOHFAS5006_Z_E07	L1L2_gt0_Del_LacZ	1	4
MGI:107164	Ppp3ca	3	+	42411	FALSE	Conditional Ready	Promotorless	EUCOMM	PCS00037_A_B05	PGS00037_A_B05 PG00037_A_1_B05	L1L2_st1	1	2
MGI:1891763	Ppp4c	7	-	295624	FALSE	Conditional Ready	Promotorless	EUCOMM	MOHPC10006_A_E11	MOHFA0006_B_7_E11 MOHFAS5006_Z_E10 MOHFAS5006_Z_E09 MOHFA0006_A_7_E11	L1L2_gt0_Del_LacZ	1	4
MGI:1196223	Prag1	8	+	41666	FALSE	Conditional Ready	Promotorless	KOMP-CSD	PCS00031_A_H03	PG00031_A_3_H03 PGS00031_A_H03 PG00031_A_15_H03 PG00031_B_2_H03	L1L2_gt0	1	4
MGI:2140473	Pramef8	4	+	43951	FALSE	Conditional Ready	Promotorless	KOMP-CSD	PCS00048_A_A03	PG00048_A_2_A03 PG00048_A_3_A03 PGS00048_A_A03 PG00048_A_4_A03 PG00048_A_1_A03	L1L2_gt0	1	5
MGI:2685844	Prdm12	2	+	39295	FALSE	Conditional Ready	Promotorless	EUCOMM	PCS00044_A_G05	PG00044_A_5_G05 PG00044_A_6_G06 PG00044_A_8_G05 PGS00044_A_G05	L1L2_gt1	1	4
MGI:2448528	Prdm13	4	-	41962	FALSE	Conditional Ready	Promotorless	EUCOMM	PCS00032_A_A05	PG00032_A_1_A05 PG00032_A_2_A05 PG00032_A_3_A05 PG00032_A_3_A06 PG00032_A_4_A06 PGS00032_A_A05	L1L2_gt0	1	6
MGI:3588194	Prdm14	1	-	44122	FALSE	Conditional Ready	Promotorless	EUCOMM	PCS00046_A_C04	PG00046_A_3_C04 PG00046_A_4_C04 PGS00046_A_C04 PG00046_A_1_C04	L1L2_gt0	1	4
MGI:1917923	Prdm16	4	-	39216	FALSE	Conditional Ready	Promotorless	EUCOMM	PCS00043_A_H11	PG00043_A_1_H11 PG00043_A_2_H11 PG00043_A_3_H11 PGS00043_A_H11	L1L2_gt1	1	4
MGI:99523	Prdx1	4	+	44950	FALSE	Conditional Ready	Promotorless	EUCOMM	PCS00050_A_C08 PCP10002_A_D07 PCP10002_A_D08 MOHPC10006_A_E12	PG00050_A_2_C08 PG00050_A_3_C08 PG00050_A_5_C08 PG00050_A_6_C08 PGS00050_A_C08 PFA0002_A_4_D07 PFA0002_A_7_D08 PG00050_A_7_C08 MOHFA0006_B_5_E12 MOHFAS5006_Z_E11 PFA0002_A_1_D08 PFA0002_A_5_D08 PFA0002_A_7_D07	L1L2_gt1 L1L2_gt1_Del_LacZ	4	13
MGI:109486	Prdx2	8	+	40320	FALSE	Conditional Ready	Promotorless	EUCOMM	PCS00030_B_A09	PG00030_B_1_A09 PG00030_B_4_A09 PG00030_C_1_A09 PGS00030_B_A09 PGS00030_C_A09 PG00030_C_4_A09 MOHFA50001_D_2_G09 MOHFA50001_D_8_G09 MOHFA50001_D_7_G09 PLNS50001_D_B06	L1L2_gt2	1	10
MGI:88034	Prdx3	19	-	44539	FALSE	Conditional Ready	Promotorless	EUCOMM	PCS00050_A_E08	PG00050_A_1_E08 PG00050_A_2_E08 PG00050_A_6_E08 PG00050_A_7_E08 PG00050_A_8_E08 PGS00050_A_E08 PG00050_A_3_E08 PG00050_A_5_E08	L1L2_gt1	1	8
MGI:894320	Prdx6	1	-	40060	FALSE	Conditional Ready	Promotorless	EUCOMM	PCS00030_B_E09	PG00030_A_1_E09 PG00030_B_1_E09 PG00030_B_4_E09 PG00030_C_1_E09 PG00030_C_2_E09 PGS00030_A_E09 PGS00030_B_E09 PGS00030_C_E09	L1L2_gt2	1	8
MGI:1355326	Preb	5	-	232606	FALSE	Conditional Ready	Promotorless	KOMP-CSD	PCS00171_A_F07	MOHFA50001_D_2_D07 MOHFA50001_D_6_D07 MOHFA50001_D_3_D07 MOHFA50001_D_1_D07 MOHFA50001_D_5_D07 MOHFA50001_D_7_D07	L1L2_gt0	1	6
MGI:1916034	Prickle1	15	-	44555	FALSE	Conditional Ready	Promotorless	EUCOMM	PCS00050_A_A06	PG00050_A_1_A06 PG00050_A_2_A06 PG00050_A_3_A06 PG00050_A_4_A06 PG00050_A_5_A06 PG00050_A_6_A06 PG00050_A_7_A06 PGS00050_A_A06	L1L2_gt0	1	8
MGI:1859635	Prickle3	X	+	40677	FALSE	Conditional Ready	Promotorless	EUCOMM	PCS00033_A_F07	PG00033_A_3_F07 PG00033_A_4_F07 PGS00033_A_F07	L1L2_gt0	1	3
MGI:1926097	Prima1	12	-	43908	FALSE	Conditional Ready	Promotorless	KOMP-CSD	PCS00045_A_C10	PG00045_A_6_C10 PG00045_D_1_C10 PGS00045_D_C10 PG00045_B_3_C10 PG00045_D_2_C10 PG00045_A_2_C10 PG00045_A_4_C10 PG00045_B_2_C10 PG00045_B_4_C10 PGS00045_A_C10 PG00045_A_5_C10 PG00045_A_1_C10 PG00045_A_3_C10 PG00045_A_7_C10	L1L2_st0	1	14
MGI:1336167	Prkab1	5	-	37294	FALSE	Conditional Ready	Promotorless	KOMP-CSD	PCS00023_E_C05	PGS00023_A_C05 PG00023_D_4_C05 PG00023_E_2_C05 PG00023_E_4_C05 PG00023_E_3_C05 PG00023_E_1_C05 PGS00023_E_C05	L1L2_gt0	1	7
MGI:97759	Prkar1b	5	-	43559	FALSE	Conditional Ready	Promotorless	EUCOMM	PCS00054_B_E05	PG00054_A_2_E05 PGS00054_A_E05	L1L2_gt2	1	2
MGI:97760	Prkar2b	12	-	42679	FALSE	Conditional Ready	Promotorless	EUCOMM	PCS00037_A_B06	PG00037_A_1_B06 PG00037_A_2_B06 PG00037_A_4_B06 PGS00037_A_B06	L1L2_gt1	1	4
MGI:97596	Prkcb	7	+	42425	FALSE	Conditional Ready	Promotorless	EUCOMM	PCS00037_A_G02	PG00037_A_2_G02 PG00037_A_3_G02 PGS00037_A_G02	L1L2_gt0	1	3
MGI:97598	Prkcd	14	-	43549	FALSE	Conditional Ready	Promotorless	EUCOMM	PCS00047_A_A06	PG00047_A_3_A06 PGS00047_A_A06 PG00047_A_1_A06 PG00047_A_2_A06	L1L2_gt0	1	4
MGI:97599	Prkce	17	+	42417	FALSE	Conditional Ready	Promotorless	EUCOMM	PCS00037_A_H01	PG00037_A_2_H02 PGS00037_A_H01	L1L2_gt0	1	2
MGI:97602	Prkcz	4	-	39222	FALSE	Conditional Ready	Promotorless	EUCOMM	PCS00011_A_G08 PCS00043_A_G08	PG00011_A_1_G08 PG00011_A_3_G08 PG00011_A_4_G08 PGS00011_A_G08 PG00043_A_2_G08 PG00043_A_4_G08 PGS00043_A_G08	L1L2_gt1	2	7
MGI:1914051	Prkrip1	5	-	43914	FALSE	Conditional Ready	Promotorless	EUCOMM	PCS00047_A_C08	PG00047_A_3_C08 PGS00047_A_C08	L1L2_gt0	1	2
MGI:1861446	Prl2a1	13	+	38895	FALSE	Conditional Ready	Promotorless	KOMP-CSD	PCS00021_A_C12	PGS00021_B_C12 PGS00021_A_C12	L1L2_st1 L1L2_gt1	1	2
MGI:1861444	Prl2b1	13	-	38884	FALSE	Conditional Ready	Promotorless	KOMP-CSD	PCS00021_A_E11	PGS00021_B_E11 PG00021_C_3_E10 PG00021_C_1_E11 PG00021_C_2_E11 PG00021_C_3_E11 PG00021_C_4_E10 PG00021_C_1_E10 PG00021_C_4_E11 PGS00021_A_E11 PG00021_C_2_E10	L1L2_st1 L1L2_gt1	1	10
MGI:3649927	Prl2c1	13	+	38896	FALSE	Conditional Ready	Promotorless	KOMP-CSD	PCS00021_A_D12	PG00021_C_1_D12 PG00021_C_2_D12 PGS00021_A_D12 PGS00021_B_D12	L1L2_st1 L1L2_gt1	1	4
MGI:1914250	Prl3a1	13	+	38883	FALSE	Conditional Ready	Promotorless	KOMP-CSD	PCS00021_A_B11	PGS00021_A_B11 PG00021_B_3_B11 PG00021_B_4_A11 PGS00021_B_B11	L1L2_gt1 L1L2_st1	1	4
MGI:97607	Prl3b1	13	+	43930	FALSE	Conditional Ready	Promotorless	KOMP-CSD	PCS00045_A_C08	PG00045_D_4_C08 PG00045_B_2_C08 PG00045_A_5_C08 PG00045_D_2_C08 PG00045_A_7_C08 PG00045_D_3_C08 PG00045_B_3_C08 PG00045_D_1_C08 PGS00045_A_C08 PGS00045_D_C08 PG00045_A_8_C08	L1L2_st1	1	11
MGI:1206587	Prl4a1	13	+	44239	FALSE	Conditional Ready	Promotorless	KOMP-CSD	PCS00049_A_D11	PG00049_A_1_D11 PGS00049_B_D11	L1L2_st1	1	2
MGI:106332	Prl5a1	13	+	38893	FALSE	Conditional Ready	Promotorless	KOMP-CSD	PCS00021_A_F12	PG00021_B_1_F12 PG00021_A_3_E12 PG00021_C_3_E12 PGS00021_B_F12 PG00021_B_3_E12 PGS00021_A_F12	L1L2_st1 L1L2_gt1	1	6
MGI:1206579	Prl6a1	13	+	38882	TRUE	Conditional Ready	Promotorless	KOMP-CSD	PCS00021_A_D11	PGS00021_A_D11	L1L2_gt1	1	1
MGI:1920494	Prl8a1	13	-	38887	FALSE	Conditional Ready	Promotorless	KOMP-CSD	PCS00021_A_B12	PGS00021_A_B12 PG00021_C_2_B12 PGS00021_B_B12	L1L2_gt1 L1L2_st1	1	3
MGI:894281	Prl8a2	13	+	38881	FALSE	Conditional Ready	Promotorless	KOMP-CSD	PCS00021_A_F11	PG00021_C_1_F11 PGS00021_B_F11 PGS00021_A_F11	L1L2_st1 L1L2_gt1	1	3
MGI:1332225	Prl8a6	13	-	38889	FALSE	Conditional Ready	Promotorless	KOMP-CSD	PCS00021_A_C11	PGS00021_A_C11 PG00021_A_4_C11	L1L2_gt1	1	2
MGI:1914560	Prl8a9	13	-	38886	FALSE	Conditional Ready	Promotorless	KOMP-CSD	PCS00021_A_G11	PGS00021_B_G11 PG00021_B_1_G11	L1L2_st1	1	2
MGI:107846	Prmt1	7	-	43070	FALSE	Conditional Ready	Promotorless	EUCOMM	PCS00046_A_B02	PG00046_A_1_B02 PG00046_A_2_B02 PG00046_A_3_B02 PG00046_A_4_B02 PGS00046_A_B02	L1L2_gt0	1	5
MGI:1919224	Prmt3	7	+	43060	FALSE	Conditional Ready	Promotorless	EUCOMM	PCS00046_A_G09	PG00046_A_1_G09 PGS00046_A_G09	L1L2_gt2	1	2
MGI:2384879	Prmt7	8	+	43053	TRUE	Conditional Ready	Promotorless	EUCOMM	PCS00046_A_D08	PG00046_A_3_D08 PG00046_A_4_D08 PGS00046_A_D08 PG00046_A_2_D08	L1L2_gt2	1	4
MGI:3043083	Prmt8	6	-	43072	FALSE	Conditional Ready	Promotorless	EUCOMM	PCS00063_A_B06	PG00063_B_3_B06 PG00063_B_4_B06 PGS00063_A_B06	L1L2_gt1	1	3
MGI:2442238	Proser2	2	-	39280	FALSE	Conditional Ready	Promotorless	EUCOMM	PCS00042_A_G02	PG00042_A_1_H02 PGS00042_A_G02	L1L2_gt0	1	2
MGI:97776	Prps2	X	-	41080	FALSE	Conditional Ready	Promotorless	KOMP-CSD	PCS00027_A_F07	PG00027_B_1_F07 PG00027_B_3_F07 PGS00027_A_F07	L1L2_gt2	1	3
MGI:2384838	Prpsap2	11	-	297	FALSE	Conditional Ready	Promotorless	EUCOMM	PCS00006_A_E05	PLBS60002_B_A09 PLB60002_B_3_G07 PLB60002_B_2_G07 PG00006_A_3_D09 PG00006_A_4_D09 PGS00006_A_D09 PG00006_A_2_D09	pL1L2_GT2_DelLacZ_bsd L1L2_gt2	1	7
MGI:97783	Psap	10	+	39542	FALSE	Conditional Ready	Promotorless	EUCOMM	PCS00044_A_E02	PG00044_A_6_E02 PG00044_A_8_E02 PGS00044_A_E02	L1L2_st1	1	3
MGI:2674093	Psd4	2	+	41854	FALSE	Conditional Ready	Promotorless	KOMP-CSD	PCS00031_A_D01	PG00031_B_1_D01 PGS00031_A_D01	L1L2_gt0	1	2
MGI:2142116	Psip1	4	-	1	FALSE	Conditional Ready	Promotorless	EUCOMM	PCS00004_A_A01	PG00004_A_4_A01 PGS00004_A_A01	L1L2_gt0	1	2
MGI:3528383	Pskh1	8	+	47351	FALSE	Conditional Ready	Promotorless	EUCOMM	PCS00063_A_G03	PG00063_B_2_G03 PG00063_B_3_G03 PG00063_B_4_G03 PGS00063_A_G03	L1L2_gt0	1	4
MGI:1347045	Psmb2	4	+	36770	TRUE	Conditional Ready	Promotorless	KOMP-CSD	PCS00023_E_C12	PG00023_E_4_C12 PG00023_C_2_D12 PG00023_C_4_D12 PG00023_C_3_C12 PG00023_C_4_C12 PG00023_E_3_C12 PG00023_C_1_C12 PG00023_C_3_D12 PG00023_D_1_C12 PG00023_C_1_D12 PG00023_D_4_C12 PGS00023_E_C12 PGS00023_A_C12	L1L2_gt1	1	13
MGI:1914401	Psmd9	5	+	42239	FALSE	Conditional Ready	Promotorless	EUCOMM	PCS00037_A_E07	PG00037_A_2_E07 PG00037_A_4_E07 PGS00037_A_E07	L1L2_gt1	1	3
MGI:1321396	Pstpip1	9	+	44607	TRUE	Conditional Ready	Promotorless	EUCOMM	PCS00050_A_C09	PG00050_A_6_C09 PGS00050_A_C09	L1L2_gt2	1	2
MGI:1921925	Ptchd3	11	+	43047	FALSE	Conditional Ready	Promotorless	KOMP-CSD	PCS00041_A_B06	PG00041_A_1_B06 PGS00041_A_B06 PG00041_A_3_B06	L1L2_gt0	1	3
MGI:109583	Pten	19	+	40179	FALSE	Conditional Ready	Promotorless	EUCOMM	PCS00030_B_D09	PG00030_B_2_D09 PG00030_B_3_D09 PG00030_B_4_D09 PG00030_C_1_D09 PG00030_C_2_D09 PG00030_C_3_D09 PGS00030_B_D09 PGS00030_C_D09 PG00030_C_4_D09	L1L2_gt2	1	9
MGI:1097156	Ptgis	2	-	33670	TRUE	Conditional Ready	Promotorless	EUCOMM	PCS00040_A_H09	PG00040_A_1_H09 PG00040_A_3_H09 PGS00040_A_H09	L1L2_st2	1	3
MGI:1914353	Ptgr1	4	-	422	FALSE	Conditional Ready	Promotorless	EUCOMM	PCS00007_A_D10 PCS00017_A_D10	PGS00007_A_D10 PG00017_B_2_D10 PG00017_B_4_D10 PGS00017_A_D10 PG00017_B_3_D10	L1L2_gt1	2	5
MGI:2180917	Pth2r	1	+	41547	FALSE	Conditional Ready	Promotorless	KOMP-CSD	PCS00028_A_E05	PG00028_B_4_E05 PG00028_B_2_E05 PG00028_B_3_E05 PGS00028_A_E05 PG00028_B_1_E05	L1L2_st0	1	5
MGI:104908	Ptk2b	14	-	38977	FALSE	Conditional Ready	Promotorless	KOMP-CSD	PCS00021_A_B09	PGS00021_A_B09	L1L2_gt0	1	1
MGI:97805	Ptpn1	2	+	35638	TRUE	Conditional Ready	Promotorless	KOMP-CSD	PCS00023_E_H06	PGS00023_E_H06	L1L2_gt0	1	1
MGI:99511	Ptpn11	5	-	40187	TRUE	Conditional Ready	Promotorless	EUCOMM	PCS00030_B_D11	PG00030_C_2_E11 PG00030_C_3_E11	L1L2_gt2	1	2
MGI:104673	Ptpn12	5	-	47961	FALSE	Conditional Ready	Promotorless	NorCOMM	M00041_I_MFG007_E8	M00041_T_MFG007_E8	L1L2_NTARU-1	1	1
MGI:107170	Ptpn22	3	+	41451	FALSE	Conditional Ready	Promotorless	EUCOMM	PCS00032_A_D02	PG00032_A_1_D02 PG00032_A_2_D02 PGS00032_A_D02 PG00032_A_4_D02	L1L2_gt0	1	4
MGI:105307	Ptpn3	4	-	36159	FALSE	Conditional Ready	Promotorless	KOMP-CSD	PCS00023_E_D11	PG00023_E_2_D11 PGS00023_E_D11	L1L2_gt1	1	2
MGI:97807	Ptpn5	7	-	37399	TRUE	Conditional Ready	Promotorless	KOMP-CSD	PCS00027_A_H08	PG00027_B_3_H07 PGS00027_A_H08	L1L2_gt2	1	2
MGI:97808	Ptpra	2	+	28617	FALSE	Conditional Ready	Promotorless	EUCOMM	PCS00008_A_H10	PG00008_A_1_H10 PG00008_A_2_H10 PG00008_A_3_H10 PG00008_A_4_H10 PGS00008_A_H10	L1L2_gt1	1	5
MGI:1321152	Ptprt	2	-	41428	FALSE	Conditional Ready	Promotorless	KOMP-CSD	PCS00028_A_B05	PG00028_B_1_B05 PG00028_B_3_B05 PGS00028_A_B05	L1L2_st0	1	3
MGI:1321151	Ptpru	4	-	47213	FALSE	Conditional Ready	Promotorless	EUCOMM	PCS00064_A_F12	PGS00064_A_F12 PG00064_A_1_F12	L1L2_st1	1	2
MGI:1929237	Pus1	5	-	43391	FALSE	Conditional Ready	Promotorless	EUCOMM	PCS00046_A_G10	PG00046_A_1_G10 PG00046_A_2_G10 PG00046_A_3_G10 PGS00046_A_G10 PG00046_A_4_G10	L1L2_st0	1	5
MGI:1926145	Pus7l	15	-	42133	FALSE	Conditional Ready	Promotorless	KOMP-CSD	PCS00036_A_E06	PGS00036_A_E06 PG00036_A_3_E06 PG00036_A_4_E06	L1L2_gt1	1	3
MGI:97828	Pygb	2	+	43863	FALSE	Conditional Ready	Promotorless	KOMP-CSD	PCS00045_A_F02	PG00045_A_7_F02 PG00045_D_1_F02 PGS00045_D_F02 PG00045_D_3_F02	L1L2_gt0	1	4
MGI:97828	Pygb	2	+	44208	FALSE	Conditional Ready	Promotorless	KOMP-CSD	PCS00049_A_E04	PG00049_A_1_E04 PGS00049_A_E04 PGS00049_B_E04	L1L2_gt1	1	3
MGI:97830	Pygm	19	+	45980	FALSE	Conditional Ready	Promotorless	EUCOMM	PCS00060_A_A03	PG00060_A_1_A03 PG00060_A_3_A03 PGS00060_A_A03 PG00060_A_4_A03	L1L2_gt0	1	4
MGI:87854	Pzp	6	-	43701	FALSE	Conditional Ready	Promotorless	EUCOMM	PCS00047_A_B11	PGS00047_A_B11 PG00047_A_1_B11	L1L2_st0	1	2
MGI:2677633	Qrfpr	3	-	44906	FALSE	Conditional Ready	Promotorless	KOMP-CSD	PCS00052_A_A08	PGS00052_A_A08 PG00052_A_1_A08 PG00052_A_7_A08 PG00052_A_6_A08	L1L2_gt1	1	4
MGI:1330818	Qsox1	1	-	43918	FALSE	Conditional Ready	Promotorless	KOMP-CSD	PCS00045_A_D12	PGS00045_A_D12 PG00045_B_4_D11 PGS00045_D_D12	L1L2_st1	1	3
MGI:1922194	Qtrtd1	16	-	45115	FALSE	Conditional Ready	Promotorless	EUCOMM	PCS00054_B_F08	PG00054_A_1_F08 PG00054_A_2_F08 PGS00054_A_F08	L1L2_gt2	1	3
MGI:2442920	Rab11fip4	11	+	13	FALSE	Conditional Ready	Promotorless	EUCOMM	PCS00004_A_A07	PG00004_A_1_A07 PG00004_A_2_B07 PG00004_A_3_A07 PG00004_A_3_A08 PG00004_A_3_B07 PG00004_A_4_A07 PGS00004_A_A07	L1L2_gt0	1	7
MGI:1928750	Rab2a	4	+	168	FALSE	Conditional Ready	Promotorless	EUCOMM	PCS00005_A_D10	PG00005_A_2_D10 PG00005_A_3_D10 PG00005_A_4_D10 PGS00005_A_D10 PG00005_A_1_D10	L1L2_gt1	1	5
MGI:1330805	Rab33b	3	+	46140	FALSE	Conditional Ready	Promotorless	EUCOMM	PCS00060_A_B03	PG00060_A_1_B03 PG00060_A_2_B03 PGS00060_A_B03 PG00060_A_3_B03	L1L2_gt0	1	4
MGI:1924657	Rab35	5	+	39389	FALSE	Conditional Ready	Promotorless	EUCOMM	PCS00044_A_A05	PG00044_A_5_A05 PG00044_A_6_A05 PG00044_A_7_A05 PG00044_A_8_A05 PGS00044_A_A05	L1L2_gt1	1	5
MGI:1917158	Rab3b	4	+	460	TRUE	Conditional Ready	Promotorless	EUCOMM	PCS00017_A_F06	PG00017_B_4_F06 PGS00017_A_F06 PG00017_B_3_F06	L1L2_gt0	1	3
MGI:105306	Rab5c	11	-	43943	FALSE	Conditional Ready	Promotorless	EUCOMM	PCS00051_A_G07	PG00051_A_1_B06 PG00051_A_2_B06 PG00051_A_3_B06 PG00051_A_4_B06 PGS00051_A_G07	L1L2_gt1	1	5
MGI:894313	Rab6a	7	+	37419	FALSE	Conditional Ready	Promotorless	KOMP-CSD	PCS00023_E_H08	PGS00023_E_H08 PG00023_E_4_H08	L1L2_gt0	1	2
MGI:2442295	Rab7b	1	+	45124	FALSE	Conditional Ready	Promotorless	KOMP-CSD	PCS00055_A_C05	PGS00055_B_C05 PG00055_A_3_C05 PGS00055_A_C05	L1L2_gt2	1	3
MGI:1929459	Rabgef1	5	+	45909	FALSE	Conditional Ready	Promotorless	EUCOMM	PCS00060_A_G06	PG00060_A_1_G06 PG00060_A_2_G06 PG00060_A_3_G06 PG00060_A_4_G06 PGS00060_A_G06	L1L2_gt1	1	5
MGI:2442633	Rabl6	2	-	34152	FALSE	Conditional Ready	Promotorless	KOMP-CSD	PCS00052_A_G03	PGS00052_A_G03 PG00052_A_6_G03	L1L2_gt1	1	2
MGI:1890476	Rad18	6	-	39875	FALSE	Conditional Ready	Promotorless	EUCOMM	PCS00019_A_C01	PG00019_A_3_C01 PGS00019_A_C01	L1L2_gt0	1	2
MGI:105128	Rad23b	4	+	36108	FALSE	Conditional Ready	Promotorless	KOMP-CSD	MOHPC10006_A_F02 MOHPC10006_A_F03 PCS00023_E_C03	MOHFA0006_A_5_F02 MOHFA0006_A_6_F02 MOHFA0006_A_7_F02 MOHFA0006_B_1_F02 MOHFA0006_B_2_F03 MOHFA0006_B_3_F03 MOHFA0006_B_5_F02 MOHFAS5006_Z_E12 MOHFAS5006_Z_F01 PG00023_C_2_C03 PG00023_C_4_C03 PG00023_C_1_C03 PG00023_D_1_C03 PG00023_D_3_C03 PG00023_D_2_C03 PGS00023_A_C03 MOHFA0006_B_4_F03 MOHFA0006_A_3_F02	L1L2_gt0_Del_LacZ L1L2_gt0	3	18
MGI:101949	Rad52	6	+	42110	FALSE	Conditional Ready	Promotorless	EUCOMM	PCS00038_A_B01	PG00038_A_2_B01 PGS00038_A_B01	L1L2_gt0	1	2
MGI:3605986	Rad54b	4	+	33739	FALSE	Conditional Ready	Promotorless	EUCOMM	PCS00040_A_H03	PG00040_A_2_H03 PGS00040_A_H03 PG00040_A_3_H03	L1L2_gt0	1	3
MGI:894697	Rad54l	4	-	36621	FALSE	Conditional Ready	Promotorless	KOMP-CSD	PCS00023_E_D04	PGS00023_A_D04 PG00023_D_2_D04 PG00023_D_4_D04	L1L2_gt0	1	3
MGI:97847	Raf1	6	-	42413	TRUE	Conditional Ready	Promotorless	EUCOMM	PCS00037_A_F02	PG00037_A_1_F02 PG00037_A_2_F02 PG00037_A_2_F03 PG00037_A_3_F02 PGS00037_A_F02	L1L2_gt0	1	5
MGI:3036245	Ralgapa2	2	-	39463	FALSE	Conditional Ready	Promotorless	EUCOMM	PCS00044_A_H05	PG00044_A_6_H05 PG00044_A_7_H05 PGS00044_A_H05 PG00044_A_8_H05	L1L2_gt1	1	4
MGI:1860292	Ramp3	11	+	218	FALSE	Conditional Ready	Promotorless	EUCOMM	PCS00005_A_E07	PG00005_A_1_E07 PG00005_A_2_E07 PG00005_A_3_E07 PG00005_A_4_E07 PGS00005_A_E07	L1L2_gt1	1	5
MGI:1919315	Rap2c	X	-	41136	FALSE	Conditional Ready	Promotorless	KOMP-CSD	PCS00027_A_G03	PGS00027_A_G03 PG00027_B_3_G03	L1L2_gt0	1	2
MGI:3611446	Rapgefl1	11	+	43806	FALSE	Conditional Ready	Promotorless	KOMP-CSD	PCS00045_A_B05	PG00045_A_5_B05 PG00045_A_7_B05 PGS00045_D_B05 PG00045_D_1_B05 PG00045_D_4_B05 PG00045_B_4_B05 PG00045_D_3_B05 PG00045_A_8_B05 PGS00045_A_B05 PG00045_B_1_B05 PG00045_A_3_B05 PG00045_B_2_B05	L1L2_gt1	1	12
MGI:1914297	Rars	11	-	33779	FALSE	Conditional Ready	Promotorless	EUCOMM	PCS00040_A_C05	PG00040_A_1_C05 PG00040_A_2_C05 PG00040_A_3_C05 PGS00040_A_C05	L1L2_gt0	1	4
MGI:1923596	Rars2	4	+	360	FALSE	Conditional Ready	Promotorless	EUCOMM	PCS00007_A_E02 PCS00017_A_E02	PG00007_B_1_E01 PG00007_B_1_E02 PG00007_B_2_E01 PG00007_B_2_E02 PG00007_B_3_E02 PG00007_B_4_E01 PG00007_B_4_E02 PG00007_B_4_F02 PGS00007_A_E02 PG00017_B_4_E02 PGS00017_A_E02 PG00007_B_3_E01	L1L2_gt0 L1L2_st0	2	12
MGI:2442060	Rassf2	2	-	35217	FALSE	Conditional Ready	Promotorless	KOMP-CSD	PCS00027_A_G06	GR00031_C05	L1L2_gt2	1	1
MGI:1194910	Rbbp7	X	+	41966	FALSE	Conditional Ready	Promotorless	EUCOMM	PCS00056_A_A05	MOHFA50001_D_8_H04 MOHFA50001_D_5_H04 MOHFA50001_D_3_H04 MOHFA50001_D_2_H04 MOHFA50001_D_4_H04 MOHFA50001_D_1_H04 PLNS50001_D_B07 MOHFA50001_D_6_H04 MOHFA50001_D_7_H04	L1L2_gt2	1	9
MGI:1347074	Rbbp9	2	-	28872	FALSE	Conditional Ready	Promotorless	EUCOMM	PCS00008_A_A03	PG00008_A_1_A03 PG00008_A_2_A03 PGS00008_A_A03	L1L2_gt0	1	3
MGI:1924188	Rbm17	2	-	39244	FALSE	Conditional Ready	Promotorless	EUCOMM	PCS00042_A_D05	PG00042_A_1_D05 PG00042_A_2_D05 PG00042_A_3_D05 PGS00042_A_D05	L1L2_gt0	1	4
MGI:1918934	Rbm43	2	-	34356	FALSE	Conditional Ready	Promotorless	KOMP-CSD	PCS00020_A_C02	PGS00020_A_C02 PG00020_A_4_C02	L1L2_gt0	1	2
MGI:1918934	Rbm43	2	-	34369	FALSE	Conditional Ready	Promotorless	KOMP-CSD	PCS00045_A_F03	PGS00045_A_F03 PG00045_D_3_F03 PG00045_D_4_F03 PGS00045_D_F03 PG00045_A_2_F03 PG00045_A_7_F03 PG00045_A_8_F03 PG00045_B_4_F03 PG00045_B_3_F03	L1L2_gt1	1	9
MGI:2387367	Rbm45	2	+	39338	FALSE	Conditional Ready	Promotorless	EUCOMM	PCS00042_A_H12	PG00042_A_2_G12 PGS00042_A_H12	L1L2_st0 L1L2_gt0	1	2
MGI:2137600	Rcc1l	5	-	42927	FALSE	Conditional Ready	Promotorless	EUCOMM	PCS00047_A_H07	PG00047_A_1_H07 PG00047_A_3_H07 PG00047_A_4_H07 PGS00047_A_H07 PG00047_A_2_H07	L1L2_gt0	1	5
MGI:104559	Rcn1	2	-	40194	FALSE	Conditional Ready	Promotorless	EUCOMM	PCS00030_B_G08	PG00030_B_1_G08 PG00030_B_2_G08 PG00030_B_3_G08 PG00030_C_1_G08 PG00030_C_2_E07 PG00030_C_2_F08 PGS00030_B_G08 PGS00030_C_G08 PG00030_C_2_G08	L1L2_st2 L1L2_gt1 L1L2_st1	1	9
MGI:1855698	Reck	4	+	395	FALSE	Conditional Ready	Promotorless	EUCOMM	PCS00005_A_H09	PG00005_A_2_H09 PG00005_A_3_H09 PG00005_A_4_H09 PGS00005_A_H09	L1L2_gt1	1	4
MGI:103021	Recql	6	-	43187	FALSE	Conditional Ready	Promotorless	EUCOMM	PCS00047_A_A03	PG00047_A_2_A03 PG00047_A_4_A03 PGS00047_A_A03 PG00047_A_3_A03	L1L2_gt0	1	4
MGI:97897	Rel	11	-	231	FALSE	Conditional Ready	Promotorless	EUCOMM	PCS00005_A_F01	PG00005_A_1_F01 PG00005_A_2_F01 PG00005_A_3_F01 PG00005_A_4_F01 PGS00005_A_F01	L1L2_gt1	1	5
MGI:1097696	Rem1	2	+	44209	FALSE	Conditional Ready	Promotorless	KOMP-CSD	PCS00049_A_F04	PGS00049_B_F04 PG00049_A_5_F04 PG00049_A_8_F04 PGS00049_A_F04	L1L2_gt1	1	4
MGI:104897	Rest	5	+	47385	TRUE	Conditional Ready	Promotorless	EUCOMM	PCS00063_A_E05	PG00063_B_2_E05 PG00063_B_4_E05 PGS00063_A_E05	L1L2_gt0	1	3
MGI:1914588	Rffl	11	-	40	FALSE	Conditional Ready	Promotorless	EUCOMM	PCS00005_A_A09 PCS00035_A_A09	PG00005_A_1_A09 PG00005_A_2_A09 PGS00005_A_A09 PG00035_A_2_A09 PGS00035_A_A09	L1L2_gt1	2	5
MGI:1923816	Rflnb	11	-	342	FALSE	Conditional Ready	Promotorless	EUCOMM	PCS00007_A_A02	PG00007_B_1_A02 PG00007_B_2_A02 PG00007_B_2_C01 PG00007_B_3_A02 PG00007_B_3_C02 PG00007_B_4_A02 PG00007_B_4_B01 PG00007_B_4_C01 PG00007_B_4_C02 PGS00007_A_A02 PG00007_B_3_C01	L1L2_gt0	1	11
MGI:3607791	Rft1	14	+	43517	FALSE	Conditional Ready	Promotorless	KOMP-CSD	PCS00045_A_G12	PG00045_B_1_G12 PGS00045_D_G12 PG00045_B_3_G12 PG00045_B_2_G12 PGS00045_A_G12	L1L2_st2	1	5
MGI:2445208	Rfx6	10	+	43096	FALSE	Conditional Ready	Promotorless	KOMP-CSD	PCS00041_A_C02	PG00041_A_4_C02 PGS00041_A_C02 PG00041_A_1_C02 PG00041_A_2_C02	L1L2_gt0	1	4
MGI:107484	Rgl1	1	-	41618	FALSE	Conditional Ready	Promotorless	KOMP-CSD	PCS00031_A_G02	PGS00031_A_G02 PG00031_B_2_G02 PG00031_B_3_G02 PG00031_A_1_G02	L1L2_gt0	1	4
MGI:1927498	Rgs18	1	-	45211	FALSE	Conditional Ready	Promotorless	KOMP-CSD	PCS00055_A_D06	PG00055_A_2_D06 PG00055_A_3_D06 PGS00055_A_D06 PGS00055_B_D06	L1L2_gt2	1	4
MGI:1354734	Rgs3	4	+	47252	FALSE	Conditional Ready	Promotorless	EUCOMM	PCS00064_A_C07	PG00064_A_2_C07 PG00064_A_3_C07 PGS00064_A_C07	L1L2_gt1	1	3
MGI:108409	Rgs4	1	-	40813	FALSE	Conditional Ready	Promotorless	EUCOMM	PCS00030_B_H05	PG00030_A_1_H05 PG00030_A_4_H05 PG00030_B_2_H05 PG00030_B_3_H05 PG00030_B_4_H05 PG00030_C_3_H05 PGS00030_A_H05 PGS00030_B_H05 PGS00030_C_H05	L1L2_gt2	1	9
MGI:108408	Rgs8	1	+	42820	FALSE	Conditional Ready	Promotorless	EUCOMM	PCS00046_A_G07	PGS00046_A_G07 PG00046_A_3_G07	L1L2_gt2	1	2
MGI:1338824	Rgs9	11	-	40107	FALSE	Conditional Ready	Promotorless	EUCOMM	PCS00029_A_E08	PG00029_A_2_E07 PG00029_A_4_E08 PGS00029_A_E08	L1L2_gt0	1	3
MGI:1202713	Rhag	17	+	44734	TRUE	Conditional Ready	Promotorless	KOMP-CSD	PCS00052_A_F07	PG00052_A_8_F07 PG00052_A_6_F07 PGS00052_A_F07 PG00052_A_5_F07 PG00052_A_7_F07	L1L2_gt1	1	5
MGI:3608413	Rhbdl2	4	+	36711	FALSE	Conditional Ready	Promotorless	KOMP-CSD	PCS00021_A_F06	PGS00021_B_F06 PG00021_B_1_F06	L1L2_st0	1	2
MGI:2179276	Rhbdl3	11	+	47173	FALSE	Conditional Ready	Promotorless	EUCOMM	PCS00063_A_G09	PG00063_B_1_G09 PG00063_B_1_H01 PG00063_B_3_G09 PG00063_B_4_G09 PG00063_B_2_G09 PGS00063_A_G09	L1L2_gt0	1	6
MGI:1888517	Rhcg	7	-	43510	FALSE	Conditional Ready	Promotorless	KOMP-CSD	PCS00045_A_B11	PG00045_A_7_B11 PG00045_D_3_B11 PG00045_D_2_B11 PGS00045_D_B11 PG00045_A_6_B11	L1L2_st1	1	5
MGI:1920546	Rhobtb3	13	-	41952	TRUE	Conditional Ready	Promotorless	KOMP-CSD	PCS00031_A_G08	PG00031_A_16_G08 PGS00031_A_G08	L1L2_gt0	1	2
MGI:106028	Rhoc	3	+	41307	FALSE	Conditional Ready	Promotorless	EUCOMM	PCS00033_A_G01	PG00033_A_3_G01 PG00033_A_4_G01 PGS00033_A_G01	L1L2_gt0	1	3
MGI:1926078	Rhot1	11	+	16	FALSE	Conditional Ready	Promotorless	EUCOMM	MOHPC10006_A_F05 MOHPC10006_A_F04 PCS00005_A_A04 PCS00035_A_A04	MOHFA0006_B_1_F05 MOHFA0006_B_2_F05 MOHFA0006_B_3_F05 MOHFA0006_B_4_F05 MOHFA0006_B_6_F04 MOHFA0006_B_7_F04 MOHFAS5006_Z_F03 PLB60002_B_1_E02 PLB60002_B_3_E02 PLBS60002_B_A01 PG00005_A_1_A04 PG00005_A_2_A04 PG00005_A_3_A04 PGS00005_A_A04 PG00035_A_1_A04 PG00035_A_1_A05 PG00035_A_2_A04 PG00035_A_2_A05 PG00035_A_3_A04 PG00035_A_3_A05 PG00035_A_4_A04 PG00035_A_4_A05 PGS00035_A_A04 MOHFA0006_B_2_F04 …	L1L2_gt1_Del_LacZ pL1L2_GT1_DelLacZ_bsd L1L2_gt1	4	25
MGI:1289234	Rhpn2	7	+	43217	FALSE	Conditional Ready	Promotorless	EUCOMM	MOHPC10006_A_F06 MOHPC10006_A_F07 PCS00047_A_D03	MOHFAS5006_Z_F04 MOHFAS5006_Z_F05 MOHFA0006_A_2_F06 MOHFA0006_A_2_F07 MOHFA0006_A_3_F06 MOHFA0006_A_3_F07 MOHFA0006_A_4_F06 MOHFA0006_A_5_F06 MOHFA0006_A_7_F06 MOHFA0006_A_8_F06 MOHFA0006_B_2_F06 MOHFA0006_B_5_F07 MOHFA0006_B_7_F06 MOHFA0006_B_7_F07 MOHFA0006_B_8_F07 PG00047_A_1_D03 PGS00047_A_D03 MOHFA0006_B_4_F06 MOHFA0006_A_1_F06 MOHFA0006_A_5_F07	L1L2_gt0_Del_LacZ L1L2_gt0	3	20
MGI:1891456	Ripk2	4	-	33746	FALSE	Conditional Ready	Promotorless	EUCOMM	PCS00040_A_F11	PG00040_A_2_F11 PGS00040_A_F11	L1L2_gt2	1	2
MGI:2181192	Ripply3	16	+	44442	FALSE	Conditional Ready	Promotorless	EUCOMM	PCS00056_A_G08	PLB60002_B_1_H03 PLB60002_B_4_H03 PLBS60002_B_C06 PLB60002_B_3_H03	pL1L2_GT2_DelLacZ_bsd	1	4
MGI:1924705	Rlf	4	-	36685	FALSE	Conditional Ready	Promotorless	KOMP-CSD	PCS00023_E_E04	PG00023_E_4_E05 PG00023_D_4_F03 PG00023_E_2_E04 PG00023_E_1_E04 PGS00023_A_E04 PG00023_E_3_E04 PG00023_E_4_E04 PG00023_D_1_E04 PG00023_C_1_E04 PG00023_D_3_E04 PGS00023_E_E04 PG00023_D_2_E04	L1L2_gt0	1	12
MGI:1914403	Rnaseh2b	14	+	40844	FALSE	Conditional Ready	Promotorless	EUCOMM	PCS00026_B_F03	PG00026_B_1_F03 PG00026_B_4_F03 PGS00026_B_F03	L1L2_gt0	1	3
MGI:2444878	Rnd1	15	-	47036	FALSE	Conditional Ready	Promotorless	EUCOMM	PCS00062_A_F12	PG00062_A_2_F12 PGS00062_A_F12	L1L2_gt0	1	2
MGI:1338755	Rnd2	11	+	44173	FALSE	Conditional Ready	Promotorless	EUCOMM	PCS00047_A_H08	PG00047_A_1_H08 PGS00047_A_H08	L1L2_gt1	1	2
MGI:1859162	Rnf10	5	-	37253	FALSE	Conditional Ready	Promotorless	KOMP-CSD	PCS00023_E_G12	PG00023_E_2_G12 PG00023_E_3_G12 PG00023_D_1_G12 PG00023_E_4_G12 PGS00023_A_G12 PG00023_C_1_G12 PG00023_E_1_G12 PG00023_C_4_G12 PG00023_D_2_G12 PG00023_D_3_G12 PGS00023_E_G12	L1L2_gt1	1	11
MGI:1352759	Rnf11	4	-	464	FALSE	Conditional Ready	Promotorless	EUCOMM	PCS00007_A_G06 PCS00017_A_G06	PG00007_B_1_G06 PG00007_B_2_G06 PG00007_B_3_G06 PG00007_B_4_G06 PGS00007_A_G06 PG00017_B_1_G06 PGS00017_A_G06 PG00017_B_2_G06 PG00017_B_3_G06	L1L2_gt0	2	9
MGI:1919206	Rnf135	11	+	17	FALSE	Conditional Ready	Promotorless	EUCOMM	PCS00004_A_A08	PG00004_A_1_A08 PG00004_A_4_A08 PGS00004_A_A08	L1L2_gt0	1	3
MGI:2442484	Rnf157	11	-	154	FALSE	Conditional Ready	Promotorless	EUCOMM	PCS00035_A_D05	PG00035_A_2_D05 PG00035_A_4_D05 PG00035_A_1_D05 PGS00035_A_D05	L1L2_gt1	1	4
MGI:1922078	Rnf185	11	-	201	FALSE	Conditional Ready	Promotorless	EUCOMM	PCS00016_A_D04 PCS00006_A_D04	PG00016_B_1_D03 PG00016_B_1_D04 PG00016_B_2_D03 PG00016_B_2_D04 PG00016_B_3_D04 PG00016_B_4_D03 PG00016_B_4_D04 PGS00016_A_D04 PGS00006_A_C10 PG00016_B_3_D03 PG00006_A_4_D03	L1L2_gt2	2	11
MGI:1101759	Rnf2	1	-	185859	TRUE	Conditional Ready	Promotorless	EUCOMM	MOHPC10006_A_F08	MOHFAS5006_Z_F06 MOHFA0006_A_2_F08	L1L2_gt0_Del_LacZ	1	2
MGI:1261771	Rnf24	2	-	39498	FALSE	Conditional Ready	Promotorless	EUCOMM	PCS00026_B_E11	PG00026_A_1_E11 PG00026_A_3_E11 PG00026_A_4_E11 PG00026_B_1_E11 PGS00026_A_E11 PGS00026_B_E11	L1L2_gt2	1	6
MGI:1921382	Rnf6	5	-	82544	FALSE	Conditional Ready	Promotorless	KOMP-CSD	PCP10002_A_F12 PCS00078_A_A06	PFA0002_A_2_F12 PFA0002_A_4_F12 PFA0002_A_3_F12 MOHFA50001_D_5_E09 MOHFA50001_D_4_E09 PLNS50001_D_D02 PFA0002_A_1_F12 PFA0002_A_5_F12	L1L2_gt1	2	8
MGI:1337096	Rnf7	9	-	41730	FALSE	Conditional Ready	Promotorless	EUCOMM	PCS00032_A_A07	PG00032_A_1_A07 PG00032_A_3_A07 PGS00032_A_A07 PG00032_A_2_A07	L1L2_gt1	1	4
MGI:1924142	Rnft1	11	+	51	FALSE	Conditional Ready	Promotorless	EUCOMM	PCS00004_A_B10	PG00004_A_1_B10 PG00004_A_2_B10 PG00004_A_3_B10 PG00004_A_4_B10 PGS00004_A_B10	L1L2_gt0	1	5
MGI:1329041	Rngtt	4	+	35941	FALSE	Conditional Ready	Promotorless	KOMP-CSD	PCS00023_E_E10	PG00023_E_3_E10 PG00023_E_4_E10 PG00023_E_2_E10 PG00023_E_1_E10 PGS00023_E_E10	L1L2_gt1	1	5
MGI:1347520	Ror1	4	+	441	FALSE	Conditional Ready	Promotorless	EUCOMM	PCS00007_A_F10 PCS00017_A_F10	PG00007_B_2_F10 PG00007_B_3_F10 PG00007_B_4_F10 PGS00007_A_F10 PG00017_B_4_F10 PG00017_B_2_F10 PG00017_B_3_F10 PGS00017_A_F10	L1L2_gt1 L1L2_st1	2	8
MGI:97999	Ros1	10	-	44860	TRUE	Conditional Ready	Promotorless	KOMP-CSD	PCS00052_A_F11	PG00052_A_5_F11 PG00052_A_6_F11 PGS00052_A_F11	L1L2_st0	1	3
MGI:1916973	Rpain	11	+	33815	FALSE	Conditional Ready	Promotorless	EUCOMM	PCS00042_A_C04	PG00042_A_1_C04 PGS00042_A_C04	L1L2_gt0	1	2
MGI:2141142	Rpap2	5	+	42323	FALSE	Conditional Ready	Promotorless	KOMP-CSD	PCS00036_A_G02	PG00036_A_2_G02 PG00036_A_1_G02 PGS00036_A_G02 PG00036_A_4_G02	L1L2_gt0	1	4
MGI:1344037	Rpgr	X	-	40784	FALSE	Conditional Ready	Promotorless	EUCOMM	PCS00033_A_H03	PG00033_A_1_H03 PG00033_A_2_H03 PG00033_A_3_H03 PG00033_A_4_H03 PGS00033_A_H03	L1L2_st1	1	5
MGI:1920563	Rpgrip1l	8	-	42837	FALSE	Conditional Ready	Promotorless	EUCOMM	PCS00046_A_D05	PG00046_A_1_D05 PG00046_A_2_D05 PG00046_A_3_D05 PG00046_A_4_D05 PGS00046_A_D05	L1L2_gt1	1	5
MGI:98036	Rpl27	11	+	106	FALSE	Conditional Ready	Promotorless	EUCOMM	PCS00004_A_C11	PG00004_A_1_C11 PG00004_A_2_C11 PG00004_A_3_C11 PG00004_A_4_C11 PGS00004_A_C11	L1L2_gt0	1	5
MGI:98085	Rpn2	2	+	35464	FALSE	Conditional Ready	Promotorless	EUCOMM	PCS00023_E_F07	PG00023_C_1_F07 PG00023_C_2_F07 PG00023_C_4_F07 PG00023_D_4_F07 PG00023_E_1_F07 PG00023_E_2_F07 PG00023_E_3_F07 PG00023_E_4_F07 PGS00023_A_F07 PGS00023_E_F07 PG00023_C_3_F07	L1L2_st0	1	11
MGI:1917211	Rpp25l	4	-	46433	FALSE	Conditional Ready	Promotorless	EUCOMM	PCS00060_A_D05	PG00060_A_1_D05 PG00060_A_2_D05 PG00060_A_3_D05 PG00060_A_4_D05 PGS00060_A_D05	L1L2_gt0	1	5
MGI:1350917	Rps3	7	-	43790	FALSE	Conditional Ready	Promotorless	EUCOMM	PCS00050_A_H06	PG00050_A_4_H06 PGS00050_A_H06	L1L2_gt0	1	2
MGI:104557	Rps6ka3	X	+	42591	FALSE	Conditional Ready	Promotorless	EUCOMM	PCS00037_A_D02	PG00037_A_1_D02 PG00037_A_2_D02 PGS00037_A_D02	L1L2_gt0	1	3
MGI:1858751	Rragc	4	+	46970	FALSE	Conditional Ready	Promotorless	EUCOMM	PCS00064_A_A04	PG00064_A_2_A04 PG00064_A_3_A04 PG00064_A_4_A04 PGS00064_A_A04 PG00064_A_1_A04	L1L2_gt0	1	5
MGI:2682305	Rsf1	7	+	39811	FALSE	Conditional Ready	Promotorless	EUCOMM	PCS00030_B_C02	PG00030_B_1_C02 PG00030_B_4_C02 PG00030_C_1_C02 PG00030_C_2_C02 PG00030_C_4_C02 PGS00030_B_C02 PGS00030_C_C02 PG00030_B_3_C02	L1L2_gt0	1	8
MGI:1913659	Rsl1d1	16	-	44877	FALSE	Conditional Ready	Promotorless	EUCOMM	PCS00054_B_F09	PG00054_A_1_F09 PGS00054_A_F09	L1L2_gt2	1	2
MGI:106379	Rtcb	10	-	42382	TRUE	Conditional Ready	Promotorless	KOMP-CSD	PCS00036_A_C04	PGS00036_A_C04 PG00036_A_3_C04 PG00036_A_2_C04	L1L2_gt0	1	3
MGI:1309480	Rtf1	2	+	34950	FALSE	Conditional Ready	Promotorless	KOMP-CSD	PCS00023_E_A09	PLB60002_B_2_A10 PLBS60002_B_A12 PLB60002_B_3_A10 PGS00023_E_A09 PG00023_E_4_A09	pL1L2_GT0_DelLacZ_bsd L1L2_gt0	1	5
MGI:2144506	Rundc1	11	+	107	FALSE	Conditional Ready	Promotorless	EUCOMM	PCS00004_A_C12	PG00004_A_1_C12 PG00004_A_2_C12 PG00004_A_3_C12 PG00004_A_4_C12 PGS00004_A_C12	L1L2_gt0	1	5
MGI:2685286	Rundc3b	5	-	41794	FALSE	Conditional Ready	Promotorless	KOMP-CSD	PCS00031_A_G06	PG00031_A_1_G06 PGS00031_A_G06	L1L2_gt1	1	2
MGI:104793	Runx1t1	4	+	171	FALSE	Conditional Ready	Promotorless	EUCOMM	PCS00005_A_D12 PCS00035_A_D12	PG00005_A_1_D12 PG00005_A_2_D12 PG00005_A_3_D12 PG00005_A_4_D12 PGS00005_A_D12 PG00035_A_4_D12	L1L2_gt1	2	6
MGI:1928760	Ruvbl1	6	+	42496	FALSE	Conditional Ready	Promotorless	EUCOMM	MOHPC10006_A_F10 MOHPC10006_A_F11 PCS00037_A_F01	MOHFA0006_A_1_F10 MOHFA0006_A_2_F10 MOHFA0006_A_2_F11 MOHFA0006_A_3_F10 MOHFA0006_A_3_F11 MOHFA0006_A_4_F10 MOHFA0006_A_6_F10 MOHFA0006_A_6_F11 MOHFA0006_A_7_F10 MOHFA0006_B_3_F10 MOHFA0006_B_3_F11 MOHFA0006_B_4_F11 MOHFA0006_B_5_F10 MOHFA0006_B_7_F10 MOHFA0006_B_7_F11 MOHFAS5006_Z_F07 MOHFAS5006_Z_F08 PG00037_A_1_F01 PG00037_A_2_F01 PG00037_A_3_F01 PGS00037_A_F01 MOHFA0006_A_5_F11 MOHFA0006_B_4_…	L1L2_gt0_Del_LacZ L1L2_gt0	3	23
MGI:1342299	Ruvbl2	7	-	373458	FALSE	Conditional Ready	Promotorless	EUCOMM	MOHPC10006_A_G01	MOHFA0006_B_7_G01 MOHFAS5006_Z_F09 MOHFAS5006_Z_F10 MOHFA0006_B_1_G01	L1L2_gt1_Del_LacZ	1	4
MGI:2153463	Rxfp2	5	+	39993	FALSE	Conditional Ready	Promotorless	EUCOMM	PCS00030_B_B06	PG00030_B_3_B06 PG00030_C_2_B06 PG00030_C_3_B06 PG00030_C_4_B06 PGS00030_B_B06 PGS00030_C_B06	L1L2_st1	1	6
MGI:1921898	S100pbp	4	-	46879	FALSE	Conditional Ready	Promotorless	EUCOMM	PCS00062_A_B12	PG00062_A_2_B12 PG00062_A_4_B12 PGS00062_A_B12 PG00062_A_3_B12	L1L2_gt0	1	4
MGI:2150641	S1pr5	9	-	46888	TRUE	Conditional Ready	Promotorless	EUCOMM	PCS00063_A_A10	PG00063_B_2_A10 PGS00063_A_A10	L1L2_gt0	1	2
MGI:1914880	Samd8	14	+	45971	FALSE	Conditional Ready	Promotorless	EUCOMM	PCS00060_A_E08	PG00060_A_1_E08 PG00060_A_2_E08 PG00060_A_3_E08 PG00060_A_4_E08 PGS00060_A_E08	L1L2_gt0	1	5
MGI:1927468	Samhd1	2	-	39509	FALSE	Conditional Ready	Promotorless	EUCOMM	PCS00044_A_F08	PG00044_A_6_F08 PGS00044_A_F08	L1L2_gt1	1	2
MGI:1913647	Sar1b	11	+	47431	FALSE	Conditional Ready	Promotorless	EUCOMM	PCS00063_A_E07	PG00063_B_1_E07 PG00063_B_4_E07 PGS00063_A_E07	L1L2_gt1	1	3
MGI:102809	Sars	3	-	405	FALSE	Conditional Ready	Promotorless	EUCOMM	PCS00005_A_H11 PCS00035_A_H11	PG00005_A_2_H11 PG00005_A_3_H11 PG00035_A_4_H11 PGS00035_A_H11 PGS00005_A_H11	L1L2_gt1	2	5
MGI:105084	Satb1	17	-	83411	FALSE	Conditional Ready	Promotorless	EUCOMM	MOHPC10006_A_G04	MOHFA0006_B_3_G04 MOHFAS5006_Z_F11	L1L2_gt1_Del_LacZ	1	2
MGI:2679336	Satb2	1	-	41799	FALSE	Conditional Ready	Promotorless	KOMP-CSD	MOHPC10006_A_G05 MOHPC10006_A_G06 PCS00031_A_H05	MOHFA0006_B_3_G05 MOHFA0006_B_5_G06 MOHFA0006_B_6_G05 PG00031_A_16_H05 PG00031_A_2_H05 PG00031_B_4_H05 PGS00031_A_H05 PG00031_B_4_H06 PG00031_A_1_H05 MOHFAS5006_Z_F12 MOHFA0006_B_4_G05	L1L2_gt1_Del_LacZ L1L2_gt1	3	11
MGI:1923061	Saxo1	4	-	39111	TRUE	Conditional Ready	Promotorless	EUCOMM	PCS00044_A_F10	PG00044_A_7_F10 PGS00044_A_F10	L1L2_gt2	1	2
MGI:1913961	Sbds	5	-	45930	FALSE	Conditional Ready	Promotorless	EUCOMM	PCS00062_A_G02	PG00062_A_1_G02 PG00062_A_2_G02 PG00062_A_4_G02 PGS00062_A_G02 PG00062_A_3_G02	L1L2_gt2	1	5
MGI:2135958	Scap	9	+	42078	FALSE	Conditional Ready	Promotorless	EUCOMM	PCS00038_A_D11	PG00038_A_3_D11 PG00038_A_4_D11 PGS00038_A_D11	L1L2_gt2	1	3
MGI:893578	Scarb1	5	-	41571	FALSE	Conditional Ready	Promotorless	EUCOMM	PCS00030_B_G07	PG00030_B_4_G07 PG00030_C_1_F07 PG00030_C_1_G07 PG00030_C_2_F07 PG00030_C_2_G07 PG00030_C_3_F07 PG00030_B_1_G07 PG00030_B_2_G07 PG00030_B_3_G07 PG00030_C_3_G07 PG00030_C_4_F07 PG00030_C_4_F08 PG00030_C_4_G07 PGS00030_B_G07 PGS00030_C_G07	L1L2_st2 L1L2_gt1 L1L2_st1	1	15
MGI:2384873	Scgn	13	-	38822	FALSE	Conditional Ready	Promotorless	KOMP-CSD	PCS00021_A_G10	PGS00021_A_G10	L1L2_gt1	1	1
MGI:3610314	Scimp	11	-	43875	FALSE	Conditional Ready	Promotorless	KOMP-CSD	PCS00045_A_A12	PGS00045_D_A12 PG00045_A_8_A12 PG00045_D_2_A12 PG00045_A_7_A12 PG00045_A_5_A12 PG00045_D_4_A12 PG00045_D_1_A12 PG00045_D_3_A12 PG00045_A_6_A12	L1L2_st1	1	9
MGI:1355310	Scly	1	+	42197	FALSE	Conditional Ready	Promotorless	KOMP-CSD	PCS00036_A_C02	PGS00036_A_C02 PG00036_A_4_C02 PG00036_A_2_C02 PG00036_A_3_C02	L1L2_gt0	1	4
MGI:1352762	Scmh1	4	+	477	FALSE	Conditional Ready	Promotorless	EUCOMM	PCS00017_A_E11 PCS00007_A_E11	PG00017_B_4_E11 PGS00017_A_E11 PGS00007_A_E11 PG00017_B_3_E11 PG00017_B_2_E11	L1L2_gt1	2	5
MGI:2446140	Scml4	10	+	42010	TRUE	Conditional Ready	Promotorless	EUCOMM	PCS00032_A_C07	PG00032_A_1_C07 PG00032_A_2_C07 PG00032_A_3_C07 PGS00032_A_C07	L1L2_gt1	1	4
MGI:1918882	Scn3b	9	+	37442	FALSE	Conditional Ready	Promotorless	KOMP-CSD	PCS00045_A_E08	PG00045_D_2_E08 PGS00045_A_E08 PG00045_B_2_E08 PG00045_D_4_E08 PG00045_A_5_E08 PG00045_A_7_E08 PG00045_A_8_E08 PGS00045_D_E08 PG00045_B_4_E08 PG00045_D_3_E08 PG00045_A_6_E08	L1L2_st0	1	11
MGI:2687406	Scn4b	9	+	39564	FALSE	Conditional Ready	Promotorless	EUCOMM	PCS00044_A_C08	PG00044_A_7_C08 PG00044_A_5_C08 PG00044_A_6_C08	L1L2_st1	1	3
MGI:1917188	Scrn1	6	-	43560	FALSE	Conditional Ready	Promotorless	EUCOMM	PCS00047_A_C06	PG00047_A_2_C06 PGS00047_A_C06 PG00047_A_4_C06	L1L2_gt0	1	3
MGI:1921866	Scrn3	2	+	27415	FALSE	Conditional Ready	Promotorless	EUCOMM	PCS00008_A_E05	PG00008_A_1_E05 PG00008_A_2_E05 PG00008_A_3_E05 PG00008_A_4_E05 PGS00008_A_E05	L1L2_gt0	1	5
MGI:2139287	Scrt2	2	+	44201	FALSE	Conditional Ready	Promotorless	KOMP-CSD	PCS00048_A_C04	PGS00048_A_C04 PG00048_A_4_C04	L1L2_gt1	1	2
MGI:1337026	Sdcbp	4	+	35829	TRUE	Conditional Ready	Promotorless	KOMP-CSD	PCS00021_A_E02	PGS00021_A_E02 PG00021_A_1_E02 PGS00021_B_E02	L1L2_gt0 L1L2_st0	1	3
MGI:108019	Sdf2	11	+	41592	FALSE	Conditional Ready	Promotorless	EUCOMM	PCS00033_A_H06	PG00033_A_3_H06 PGS00033_A_H06	L1L2_st1	1	2
MGI:2443847	Sdk2	11	-	151	FALSE	Conditional Ready	Promotorless	EUCOMM	PCS00005_A_D03	PG00005_A_1_D03 PG00005_A_2_D03 PGS00005_A_D03 PG00005_A_3_D03	L1L2_gt1	1	4
MGI:2668443	Sdr16c5	4	-	41346	FALSE	Conditional Ready	Promotorless	KOMP-CSD	PCS00028_A_E02	PGS00028_A_E02 PG00028_B_4_E02 PG00028_B_2_E02 PG00028_B_3_E02	L1L2_st0	1	4
MGI:2685269	Sdr16c6	4	-	43965	FALSE	Conditional Ready	Promotorless	KOMP-CSD	PCS00048_A_A01	PGS00048_A_A01 PG00048_A_2_A01	L1L2_gt0	1	2
MGI:1921386	Sec14l1	11	+	47413	TRUE	Conditional Ready	Promotorless	EUCOMM	PCS00064_A_F03	PG00064_A_1_F03 PG00064_A_2_F03 PG00064_A_3_F03 PGS00064_A_F03	L1L2_gt0	1	4
MGI:1915065	Sec14l2	11	-	205	FALSE	Conditional Ready	Promotorless	EUCOMM	PCS00004_A_E11 PCS00034_A_E11	PG00004_A_1_E11 PG00004_A_2_E11 PG00004_A_3_E11 PG00004_A_4_E11 PGS00004_A_E11 PG00034_A_1_D02 PG00034_A_6_D02 PG00034_A_8_D02 PGS00034_A_E11	L1L2_gt0	2	9
MGI:3617848	Sec14l3	11	+	41843	FALSE	Conditional Ready	Promotorless	KOMP-CSD	PCS00031_A_H01	PG00031_B_1_H01 PG00031_B_1_H02 PG00031_B_3_H01 PGS00031_A_H01	L1L2_gt0	1	4
MGI:2148802	Sec16b	1	+	41606	FALSE	Conditional Ready	Promotorless	KOMP-CSD	PCS00031_A_A03	PGS00031_A_A03 PG00031_B_1_B03	L1L2_gt0	1	2
MGI:1349635	Sec23a	12	-	44833	FALSE	Conditional Ready	Promotorless	KOMP-CSD	PCS00052_A_D06	PGS00052_A_D06 PG00052_A_2_D06 PG00052_A_7_D06 PG00052_A_6_D06 PG00052_A_8_D06	L1L2_gt2	1	5
MGI:1858417	Sec61a1	6	-	43111	FALSE	Conditional Ready	Promotorless	EUCOMM	PCS00050_A_A10	PG00050_A_5_A10 PG00050_A_7_A10 PG00050_A_8_A10 PGS00050_A_A10	L1L2_gt0	1	4
MGI:1922670	Secisbp2	13	+	40098	FALSE	Conditional Ready	Promotorless	EUCOMM	PCS00029_A_H11	PG00029_A_4_H10 PGS00029_A_H11	L1L2_gt1	1	2
MGI:1931466	Selenok	14	+	44541	FALSE	Conditional Ready	Promotorless	EUCOMM	PCS00050_A_E10	PG00050_A_2_E10 PG00050_A_4_E10 PG00050_A_7_E10 PG00050_A_8_E10 PGS00050_A_E10	L1L2_gt1	1	5
MGI:2151208	Selenon	4	-	44661	FALSE	Conditional Ready	Promotorless	KOMP-CSD	PCS00049_A_A06	PGS00049_B_A06 PG00049_A_1_A06	L1L2_gt1	1	2
MGI:1919007	Selenoo	15	+	44530	FALSE	Conditional Ready	Promotorless	EUCOMM	PCS00050_A_F09	PG00050_A_2_F09 PG00050_A_3_F09 PG00050_A_7_F09 PG00050_A_8_F09 PGS00050_A_F09 PG00050_A_6_F09	L1L2_gt2	1	6
MGI:95994	Selenos	7	+	44543	FALSE	Conditional Ready	Promotorless	EUCOMM	PCS00050_A_F10	PG00050_A_1_F10 PG00050_A_2_F10 PG00050_A_4_F10 PG00050_A_5_F10 PG00050_A_6_F10 PGS00050_A_F10 PG00050_A_3_F10	L1L2_gt1	1	7
MGI:1916477	Selenot	3	+	40448	FALSE	Conditional Ready	Promotorless	EUCOMM	PCS00030_B_G09	PG00030_B_4_G09 PG00030_C_1_G09 PG00030_C_2_G09 PG00030_C_3_G09 PG00030_C_4_G09 PGS00030_B_G09 PGS00030_C_G09	L1L2_st2	1	7
MGI:107558	Sema3a	5	+	40251	FALSE	Conditional Ready	Promotorless	EUCOMM	PCS00029_A_F01	PG00029_A_2_F01 PGS00029_A_F01	L1L2_st0	1	2
MGI:107560	Sema4a	3	-	41837	FALSE	Conditional Ready	Promotorless	EUCOMM	PCS00063_A_G12	PG00063_B_4_G12 PGS00063_A_G12 PG00063_B_2_G12	L1L2_st1	1	3
MGI:107559	Sema4b	7	+	40407	FALSE	Conditional Ready	Promotorless	EUCOMM	PCS00029_A_B10	PG00029_A_2_B10 PGS00029_A_B10	L1L2_st1	1	2
MGI:109244	Sema4d	13	-	40021	TRUE	Conditional Ready	Promotorless	EUCOMM	PCS00029_A_F06	PG00029_A_1_F06 PG00029_A_2_F06 PG00029_A_3_F06 PGS00029_A_F06	L1L2_st0	1	4
MGI:1340055	Sema4f	6	-	40372	FALSE	Conditional Ready	Promotorless	EUCOMM	PCS00029_A_F05	PG00029_A_2_F05 PG00029_A_3_F05 PG00029_A_4_F05 PGS00029_A_F05	L1L2_st0	1	4
MGI:1338032	Sema6c	3	+	41362	FALSE	Conditional Ready	Promotorless	EUCOMM	PCS00032_A_E05	PG00032_A_1_E05 PG00032_A_3_E05 PG00032_A_4_E05 PGS00032_A_E05 PG00032_A_2_E05	L1L2_st0	1	5
MGI:1270156	Sept4	11	+	60	FALSE	Conditional Ready	Promotorless	EUCOMM	PCS00005_A_B02 PCS00035_A_B02	PG00005_A_1_B02 PG00005_A_2_B02 PG00005_A_3_B02 PGS00005_A_B02 PG00035_A_1_B02 PG00035_A_3_B05 PGS00035_A_B02 PG00005_A_4_B02	L1L2_gt1	2	8
MGI:1888939	Sept6	X	-	40769	FALSE	Conditional Ready	Promotorless	EUCOMM	PCS00033_A_A01	PGS00033_A_A01 PG00033_A_1_A01	L1L2_gt0	1	2
MGI:894310	Sept8	11	+	273	FALSE	Conditional Ready	Promotorless	EUCOMM	PCS00034_A_G10 PCS00004_A_G10	PG00034_A_7_B03 PG00034_A_8_B03 PGS00034_A_G10 PG00004_A_1_G10 PG00004_A_2_G10 PG00004_A_3_G10 PG00004_A_4_G10 PGS00004_A_G10 PG00034_A_3_B03 PG00034_A_4_B03 PG00034_A_6_B03	L1L2_gt0	2	11
MGI:2447813	Serac1	17	-	42544	FALSE	Conditional Ready	Promotorless	KOMP-CSD	PCS00036_A_F11	PG00036_A_2_F11 PGS00036_A_F11 PG00036_A_4_F11 PG00036_A_1_F11 PG00036_A_3_F11	L1L2_gt2	1	5
MGI:1351630	Sergef	7	-	43886	FALSE	Conditional Ready	Promotorless	EUCOMM	PCS00051_A_B07	PG00051_A_2_B07 PGS00051_A_B07	L1L2_gt1	1	2
MGI:1919132	Serinc2	4	-	46903	FALSE	Conditional Ready	Promotorless	EUCOMM	PCS00063_A_E11	PG00063_B_1_E11 PGS00063_A_E11	L1L2_st0	1	2
MGI:1349457	Serinc3	2	-	35556	FALSE	Conditional Ready	Promotorless	KOMP-CSD	PCS00021_A_F08	PGS00021_A_F08 PG00021_B_3_F08 PGS00021_B_F08	L1L2_gt0 L1L2_st0	1	3
MGI:92638	Serp1	3	-	47444	FALSE	Conditional Ready	Promotorless	EUCOMM	PCS00064_A_E10	PG00064_A_1_E10 PGS00064_A_E10 PG00064_A_3_E10	L1L2_gt1	1	3
MGI:2667725	Serpina10	12	-	44731	FALSE	Conditional Ready	Promotorless	KOMP-CSD	PCS00052_A_G09	PG00052_A_7_H10 PGS00052_A_G09	L1L2_st1 L1L2_st0	1	2
MGI:105045	Serpina3n	12	+	41268	FALSE	Conditional Ready	Promotorless	KOMP-CSD	PCS00028_A_B09	PG00028_B_2_B09 PG00028_B_4_B09 PGS00028_A_B09	L1L2_st1	1	3
MGI:1919119	Serpinb12	1	+	41561	FALSE	Conditional Ready	Promotorless	KOMP-CSD	PCS00028_A_F05	PGS00028_A_F05 PG00028_B_3_F05 PG00028_B_4_F05	L1L2_gt0	1	3
MGI:2667783	Serpinb6d	13	+	44248	TRUE	Conditional Ready	Promotorless	KOMP-CSD	PCS00049_A_E01	PG00049_A_6_E01 PGS00049_B_E01 PGS00049_A_E01 PG00049_A_1_E01 PG00049_A_7_E01	L1L2_gt0	1	5
MGI:2667778	Serpinb6e	13	-	43907	FALSE	Conditional Ready	Promotorless	KOMP-CSD	PCS00045_A_E05	PGS00045_A_E05 PG00045_A_3_E05 PG00045_A_6_E05 PG00045_D_4_E05 PG00045_A_4_E05 PG00045_A_5_E05 PG00045_A_7_E05 PG00045_B_2_E05 PGS00045_D_E05 PG00045_A_8_E05 PG00045_D_2_E05 PG00045_B_4_E05 PG00045_D_1_E05 PG00045_A_2_E05 PG00045_D_3_E05 PG00045_B_3_E05 PG00045_B_1_E05	L1L2_gt1	1	17
MGI:106603	Serpinb9	13	+	38935	FALSE	Conditional Ready	Promotorless	KOMP-CSD	PCS00021_A_H12	PGS00021_A_H12	L1L2_gt1	1	1
MGI:101780	Serpine2	1	-	47174	TRUE	Conditional Ready	Promotorless	EUCOMM	PCS00063_A_H10	PG00063_B_4_H10 PGS00063_A_H10	L1L2_st1	1	2
MGI:2155278	Sesn1	10	+	40001	FALSE	Conditional Ready	Promotorless	EUCOMM	PCS00029_A_F08	PG00029_A_2_F08 PG00029_A_4_F08 PGS00029_A_F08	L1L2_gt0	1	3
MGI:1922997	Sesn3	9	+	40301	TRUE	Conditional Ready	Promotorless	EUCOMM	PCS00029_A_D04	PG00029_A_2_D04 PG00029_A_4_D04 PGS00029_A_D04	L1L2_gt0	1	3
MGI:2446244	Setd1a	7	+	39777	FALSE	Conditional Ready	Promotorless	EUCOMM	MOHPC10006_A_G08 MOHPC10006_A_G09 MOHPC10006_A_G07 PCS00019_A_B02	MOHFA0006_A_2_G08 MOHFA0006_A_5_G08 MOHFA0006_A_5_G09 MOHFA0006_A_6_G09 MOHFA0006_A_7_G08 MOHFA0006_A_8_G08 MOHFA0006_B_3_G08 MOHFA0006_B_4_G08 MOHFA0006_B_5_G08 MOHFA0006_B_6_G07 MOHFA0006_B_6_G08 MOHFA0006_B_7_G08 MOHFA0006_B_8_G08 PG00019_A_4_B02 PGS00019_A_B02 PG00019_A_3_B02 MOHFA0006_B_4_G07 MOHFA0006_A_1_G08 MOHFA0006_A_6_G08 MOHFAS5006_Z_G02	L1L2_gt0_Del_LacZ L1L2_gt0	4	20
MGI:1920145	Setd5	6	+	39685	FALSE	Conditional Ready	Promotorless	EUCOMM	PCS00019_A_B10	PG00019_A_1_D10 PG00019_A_2_D10 PG00019_A_3_D10 PG00019_A_4_D10 PGS00019_A_B10 PG00019_A_1_D09	L1L2_st2 L1L2_gt2 L1L2_gt1	1	6
MGI:1934229	Setdb1	3	-	39882	FALSE	Conditional Ready	Promotorless	EUCOMM	PCS00019_A_G05	PG00019_A_2_G05 PG00019_A_3_G05 PG00019_A_4_G05 PGS00019_A_G05 PG00019_A_1_G05	L1L2_gt1	1	5
MGI:104745	Sez6	11	+	3	FALSE	Conditional Ready	Promotorless	EUCOMM	PCS00005_A_A01	PG00005_A_2_A01 PG00005_A_3_A01 PG00005_A_4_A01 PGS00005_A_A01 PG00005_A_1_A01	L1L2_gt1	1	5
MGI:1914715	Sf3a1	11	+	207	FALSE	Conditional Ready	Promotorless	EUCOMM	PCS00006_A_D06 PCS00016_A_D06	PG00006_A_2_C12 PLB60002_B_2_G06 PLB60002_B_1_G06 PLBS60002_B_A06 PLB60002_B_4_G06 PG00006_A_4_C12 PGS00006_A_C12 PG00016_B_1_D06 PG00016_B_2_D06 PG00016_B_3_D06 PGS00016_A_D06 PG00016_B_4_D06	L1L2_gt2 pL1L2_GT2_DelLacZ_bsd	2	12
MGI:1920344	Sgip1	4	+	39126	FALSE	Conditional Ready	Promotorless	EUCOMM	PCS00043_A_D11	PG00043_A_3_D11 PGS00043_A_D11	L1L2_gt1	1	2
MGI:1919665	Sgol1	17	-	47338	FALSE	Conditional Ready	Promotorless	EUCOMM	PCS00063_A_F03	PG00063_B_1_F03 PG00063_B_3_F03 PGS00063_A_F03	L1L2_gt0	1	3
MGI:1098767	Sgol2a	1	+	42850	TRUE	Conditional Ready	Promotorless	EUCOMM	PCS00046_A_H06	PG00046_A_1_H06 PG00046_A_2_H06 PG00046_A_3_H06 PGS00046_A_H06	L1L2_gt1	1	4
MGI:3622649	Sh2d1b2	1	+	39968	FALSE	Conditional Ready	Promotorless	EUCOMM	PCS00019_A_H12	PG00019_A_1_H12 PG00019_A_2_H12 PG00019_A_3_H12 PG00019_A_4_H12 PGS00019_A_H12	L1L2_gt2	1	5
MGI:1351631	Sh2d3c	2	+	34007	FALSE	Conditional Ready	Promotorless	KOMP-CSD	PCS00020_A_F02	PG00020_A_3_F02 PG00020_A_1_F02 PG00020_A_2_F02 PGS00020_A_F02 PG00020_A_4_F01	L1L2_gt0	1	5
MGI:1346349	Sh3bp2	5	+	45066	FALSE	Conditional Ready	Promotorless	KOMP-CSD	PCS00055_A_H04	PG00055_A_7_H04 PGS00055_A_H04 PG00055_A_2_H04 PG00055_A_7_H01 PGS00055_B_H04 PG00055_A_3_H04 PG00055_A_4_H04	L1L2_gt2 L1L2_gt0	1	7
MGI:700009	Sh3gl2	4	+	438	FALSE	Conditional Ready	Promotorless	EUCOMM	PCS00007_A_G05	PG00007_B_2_H05 PG00007_B_3_G05 PGS00007_A_G05	L1L2_gt0	1	3
MGI:700009	Sh3gl2	4	+	45700	FALSE	Conditional Ready	Promotorless	EUCOMM	PCS00060_A_A02	PG00060_A_1_A02 PGS00060_A_A02 PG00060_A_4_A02	L1L2_gt0	1	3
MGI:2442062	Sh3pxd2b	11	+	243	FALSE	Conditional Ready	Promotorless	EUCOMM	PCS00004_A_F10 PCS00034_A_F10	PG00004_A_2_F10 PG00034_A_1_C03 PGS00034_A_F10 PGS00004_A_F10	L1L2_gt0 L1L2_st0	2	4
MGI:3613677	Shank1	7	+	39541	FALSE	Conditional Ready	Promotorless	KOMP-CSD	PCS00026_B_C11	PGS00026_B_C11 PG00026_B_2_C11 PG00026_A_1_C11 PG00026_B_3_C11 PG00026_B_4_C11 PGS00026_A_C11 PG00026_A_3_C11 PG00026_B_6_C11	L1L2_gt2	1	8
MGI:1919086	Shcbp1l	1	+	41722	TRUE	Conditional Ready	Promotorless	KOMP-CSD	PCS00031_A_H02	PG00031_B_2_H02 PGS00031_A_H02	L1L2_gt0	1	2
MGI:109238	Shfm1	6	-	111540	FALSE	Conditional Ready	Promotorless	EUCOMM	MOHPC10006_A_G10	MOHFA0006_B_7_G10	L1L2_gt1_Del_LacZ	1	1
MGI:98297	Shh	5	-	39984	FALSE	Conditional Ready	Promotorless	EUCOMM	PCS00029_A_B07	PG00029_A_1_B07 PG00029_A_3_B07 PG00029_A_4_B07 PG00029_A_2_B07 PGS00029_A_B07	L1L2_st0	1	5
MGI:1924802	Shisa4	1	-	45184	FALSE	Conditional Ready	Promotorless	KOMP-CSD	PCS00055_A_H12	PGS00055_B_H12 PG00055_A_1_H12 PGS00055_A_H12	L1L2_st2	1	3
MGI:2685725	Shisa6	11	-	310	TRUE	Conditional Ready	Promotorless	EUCOMM	PCS00006_A_E07 PCS00016_A_E07	PG00006_A_2_D11 PG00006_A_4_D11 PGS00006_A_D11 PG00016_B_1_E07 PG00016_B_2_E07 PG00016_B_3_E07 PG00016_B_4_E07 PGS00016_A_E07	L1L2_gt2 L1L2_st2	2	8
MGI:1919421	Shq1	6	-	43757	FALSE	Conditional Ready	Promotorless	EUCOMM	PCS00054_B_B06	PG00054_A_3_B06 PGS00054_A_B06	L1L2_gt2	1	2
MGI:107194	Shroom2	X	-	40793	FALSE	Conditional Ready	Promotorless	EUCOMM	MOHPC10006_A_G12 PCS00032_A_H03	MOHFA0006_B_4_G12 MOHFAS5006_Z_G05 PG00032_A_2_H03 PGS00032_A_H03 PG00032_A_4_H03	L1L2_gt0_Del_LacZ L1L2_gt0	2	5
MGI:1927664	Sirt2	7	+	39885	TRUE	Conditional Ready	Promotorless	EUCOMM	PCS00019_A_E01	PG00019_A_3_E01 PG00019_A_4_E01 PGS00019_A_E01	L1L2_gt0	1	3
MGI:1927664	Sirt2	7	+	47367	FALSE	Conditional Ready	Promotorless	EUCOMM	PCS00013_A_B02	PGS00013_A_A03	L1L2_gt0	1	1
MGI:1927665	Sirt3	7	-	47264	FALSE	Conditional Ready	Promotorless	EUCOMM	PCS00064_A_F08	PG00064_A_1_F08 PGS00064_A_F08	L1L2_gt1	1	2
MGI:2385849	Sirt7	11	-	44025	FALSE	Conditional Ready	Promotorless	KOMP-CSD	PCS00048_A_D01	PGS00048_A_D01 PG00048_A_3_D01 PG00048_A_2_D01 PG00048_A_1_D01 PG00048_A_4_D01	L1L2_gt0	1	5
MGI:103575	Skp1a	11	+	270	FALSE	Conditional Ready	Promotorless	EUCOMM	PCS00004_A_G08	PG00004_A_1_G08 PG00004_A_2_G08 PG00004_A_3_G08 PG00004_A_4_G08 PGS00004_A_G08	L1L2_gt0	1	5
MGI:3606480	Slc10a4	5	+	45073	FALSE	Conditional Ready	Promotorless	KOMP-CSD	PCS00055_A_H08	PG00055_A_6_H08 PG00055_A_2_H08 PG00055_A_8_H08 PGS00055_A_H08 PGS00055_B_H08 PG00055_A_1_H08 PG00055_A_3_H08	L1L2_gt2	1	7
MGI:2442367	Slc13a4	6	-	43133	FALSE	Conditional Ready	Promotorless	EUCOMM	PCS00050_A_C12	PG00050_A_2_C12 PG00050_A_4_C12 PG00050_A_5_C12 PG00050_A_6_C12 PG00050_A_7_C12 PG00050_A_8_C12 PGS00050_A_C12	L1L2_gt0	1	7
MGI:3037150	Slc13a5	11	-	40170	FALSE	Conditional Ready	Promotorless	EUCOMM	PCS00030_B_B09	PG00030_B_2_B09 PG00030_C_1_B09 PG00030_C_2_B09 PG00030_C_3_B09 PGS00030_B_B09 PGS00030_C_B09	L1L2_st2	1	6
MGI:106013	Slc16a1	3	+	41457	TRUE	Conditional Ready	Promotorless	EUCOMM	PCS00033_A_H05	PG00033_A_2_H05 PG00033_A_3_H05 PG00033_A_4_H05 PGS00033_A_H05	L1L2_gt0	1	4
MGI:1203732	Slc16a2	X	-	41111	FALSE	Conditional Ready	Promotorless	KOMP-CSD	PCS00027_A_B12	PGS00027_A_B12 PG00027_B_3_B12 PG00027_B_4_B12 PG00027_B_1_B12 PG00027_B_2_B12	L1L2_gt2	1	5
MGI:2144585	Slc16a6	11	-	128	FALSE	Conditional Ready	Promotorless	EUCOMM	PCS00006_A_C04 PCS00016_A_C04	PG00006_A_1_B12 PG00006_A_2_B12 PG00006_A_4_B12 PG00016_B_1_C04 PG00016_B_2_C04 PG00016_B_3_C04 PG00016_B_4_C04 PGS00016_A_C04 PGS00006_A_B12	L1L2_gt2	2	9
MGI:2443098	Slc17a2	13	+	43900	FALSE	Conditional Ready	Promotorless	KOMP-CSD	PCS00045_A_G06	PG00045_A_1_G06 PG00045_A_6_G06 PG00045_A_5_G06 PG00045_A_8_G06 PG00045_D_1_G06 PGS00045_D_G06 PGS00045_A_G06 PG00045_A_3_G06 PG00045_A_2_G06 PG00045_B_1_G06 PG00045_B_3_G06 PG00045_D_4_G06 PG00045_A_4_G06 PG00045_B_4_G06 PG00045_D_2_G06	L1L2_gt0	1	15
MGI:2389216	Slc17a3	13	+	41305	FALSE	Conditional Ready	Promotorless	KOMP-CSD	PCS00028_A_C09	PG00028_B_4_C09 PGS00028_A_C09	L1L2_gt1	1	2
MGI:2442850	Slc17a4	13	-	44278	FALSE	Conditional Ready	Promotorless	KOMP-CSD	PCS00048_A_B08	PGS00048_A_B08 PG00048_A_3_B08	L1L2_gt0	1	2
MGI:3039629	Slc17a8	10	-	42931	FALSE	Conditional Ready	Promotorless	KOMP-CSD	PCS00041_A_F05	PG00041_A_2_F05 PG00041_A_1_F05 PG00041_A_4_F05 PGS00041_A_F05	L1L2_gt0	1	4
MGI:1919107	Slc17a9	2	+	39538	FALSE	Conditional Ready	Promotorless	EUCOMM	PCS00044_A_D05	PG00044_A_5_D05 PG00044_A_6_D05 PG00044_A_8_D05 PGS00044_A_D05	L1L2_gt1	1	4
MGI:106684	Slc18a1	8	-	44075	FALSE	Conditional Ready	Promotorless	KOMP-CSD	PCS00048_A_F08	PG00048_A_2_F08 PG00048_A_4_F08 PG00048_A_1_F08 PGS00048_A_F08	L1L2_gt1	1	4
MGI:2135601	Slc1a4	11	-	41211	FALSE	Conditional Ready	Promotorless	KOMP-CSD	PCS00049_A_G08	PGS00049_B_G08 PG00049_A_2_G08 PG00049_A_3_G08 PGS00049_A_G08 PG00049_A_5_G08	L1L2_gt0	1	5
MGI:2444087	Slc1a7	4	+	39155	FALSE	Conditional Ready	Promotorless	EUCOMM	PCS00042_A_C12	PG00042_A_2_C12 PGS00042_A_C12	L1L2_st0	1	2
MGI:1918090	Slc22a16	10	+	42527	FALSE	Conditional Ready	Promotorless	KOMP-CSD	PCS00036_A_B11	PGS00036_A_B11 PG00036_A_2_B11 PG00036_A_1_B11 PG00036_A_4_B11 PG00036_A_3_B11	L1L2_gt2	1	5
MGI:1929481	Slc22a21	11	-	37797	FALSE	Conditional Ready	Promotorless	KOMP-CSD	PCS00045_A_F07	PG00045_A_3_F07 PG00045_B_3_F07 PG00045_A_4_F07 PGS00045_D_F07 PGS00045_A_F07 PG00045_A_2_F07 PG00045_B_4_F07	L1L2_gt2	1	7
MGI:1329012	Slc22a5	11	-	275	FALSE	Conditional Ready	Promotorless	EUCOMM	PCS00005_A_F06 PCS00035_A_F06	PG00005_A_1_F06 PG00005_A_2_F06 PG00005_A_3_F06 PG00005_A_4_F05 PGS00005_A_F06 PG00035_A_2_F06 PG00035_A_3_F06 PGS00035_A_F06	L1L2_gt1	2	8
MGI:1923626	Slc24a2	4	-	41471	FALSE	Conditional Ready	Promotorless	KOMP-CSD	PCS00028_A_A06	PG00028_B_1_A06 PG00028_B_3_A06 PGS00028_A_A06 PG00028_B_4_A06 PG00028_B_2_A06	L1L2_gt0	1	5
MGI:2677271	Slc24a5	2	+	43958	FALSE	Conditional Ready	Promotorless	KOMP-CSD	PCS00048_A_G11	PG00048_A_4_G11 PG00048_A_3_G11 PGS00048_A_G11 PG00048_A_1_G11	L1L2_st1	1	4
MGI:1345283	Slc25a1	16	-	45102	FALSE	Conditional Ready	Promotorless	EUCOMM	PCS00054_B_B01	PG00054_A_3_B01 PG00054_A_4_B01 PGS00054_A_B01	L1L2_gt1	1	3
MGI:1926080	Slc25a12	2	-	39344	FALSE	Conditional Ready	Promotorless	EUCOMM	PCS00042_A_H07	PG00042_A_4_G07 PGS00042_A_H07	L1L2_gt0	1	2
MGI:2445059	Slc25a21	12	-	41920	FALSE	Conditional Ready	Promotorless	KOMP-CSD	PCS00036_A_A07	PG00036_A_4_A07 PGS00036_A_A07 PG00036_A_2_A07 PG00036_A_3_A07	L1L2_gt2	1	4
MGI:1917160	Slc25a24	3	+	35816	FALSE	Conditional Ready	Promotorless	KOMP-CSD	PCS00021_A_D04	PGS00021_A_D04 PG00021_A_2_D04	L1L2_gt0	1	2
MGI:1917806	Slc25a33	4	-	39205	FALSE	Conditional Ready	Promotorless	EUCOMM	PCS00044_A_G10	PG00044_A_5_G10 PG00044_A_6_G11 PG00044_A_7_G10 PG00044_A_8_G10 PGS00044_A_G10	L1L2_gt2	1	5
MGI:1921936	Slc25a54	3	+	35811	FALSE	Conditional Ready	Promotorless	KOMP-CSD	PCS00021_A_A04	PG00021_B_2_A04 PG00021_A_2_A04 PG00021_B_4_A04 PGS00021_B_A04 PG00021_A_1_A04 PGS00021_A_A04	L1L2_st0 L1L2_gt0	1	6
MGI:1913105	Slc28a2	2	+	39454	FALSE	Conditional Ready	Promotorless	KOMP-CSD	PCS00028_A_F12	PGS00028_A_F12 PG00028_B_1_F12	L1L2_gt2	1	2
MGI:1928369	Slc2a5	4	+	39208	FALSE	Conditional Ready	Promotorless	EUCOMM	PCS00026_B_E09	PG00026_B_2_E09 PG00026_B_3_E09 PG00026_B_4_E09 PG00026_B_7_E09 PGS00026_B_E09 PG00026_B_6_E09 PG00026_B_8_E09	L1L2_gt2	1	7
MGI:1860103	Slc2a8	2	-	26705	FALSE	Conditional Ready	Promotorless	EUCOMM	PCS00008_A_A01	PG00008_A_1_A01 PGS00008_A_A01 PG00008_A_4_A01	L1L2_gt0	1	3
MGI:2152844	Slc2a9	5	-	44760	FALSE	Conditional Ready	Promotorless	KOMP-CSD	PCS00052_A_G08	PG00052_A_6_G08 PG00052_A_5_G08 PGS00052_A_G08	L1L2_gt2	1	3
MGI:1345282	Slc30a4	2	-	43906	FALSE	Conditional Ready	Promotorless	KOMP-CSD	PCS00045_A_B07	PG00045_D_2_B07 PG00045_A_8_B07 PG00045_B_2_B07 PGS00045_A_B07 PG00045_A_6_B07 PG00045_B_4_B07 PG00045_D_4_B07 PG00045_A_5_B07 PGS00045_D_B07 PG00045_B_1_B07 PG00045_D_1_B07	L1L2_gt1	1	11
MGI:1333844	Slc31a2	4	+	23	FALSE	Conditional Ready	Promotorless	EUCOMM	PCS00004_A_A11 PCS00034_A_A11	PG00004_A_1_A11 PG00004_A_3_A11 PG00004_A_4_A11 PGS00004_A_A11 PG00034_A_5_H02 PG00034_A_6_H02 PG00034_A_8_H02 PGS00034_A_A11 PG00034_A_7_H02	L1L2_gt0 L1L2_st0	2	9
MGI:1194488	Slc32a1	2	+	44210	FALSE	Conditional Ready	Promotorless	KOMP-CSD	PCS00048_A_H07	PG00048_A_2_H07 PG00048_A_1_H07 PG00048_A_3_H07 PG00048_A_4_H07 PGS00048_A_H07	L1L2_gt0	1	5
MGI:1332247	Slc33a1	3	-	44962	TRUE	Conditional Ready	Promotorless	KOMP-CSD	PCS00052_A_C08	PG00052_A_6_C08 PG00052_A_7_C08 PGS00052_A_C08 PG00052_A_5_C08 PG00052_A_8_C08	L1L2_gt1	1	5
MGI:1342284	Slc34a2	5	+	44718	FALSE	Conditional Ready	Promotorless	KOMP-CSD	PCS00049_A_E10	PGS00049_B_E10 PG00049_A_1_E10 PGS00049_A_E10	L1L2_gt1	1	3
MGI:1345622	Slc35a1	4	-	358	FALSE	Conditional Ready	Promotorless	EUCOMM	PCS00005_A_G08	PG00005_A_1_G08 PG00005_A_2_G08 PG00005_A_3_G08 PG00005_A_4_G08 PGS00005_A_G08	L1L2_gt1	1	5
MGI:1921352	Slc35a5	16	-	43847	FALSE	Conditional Ready	Promotorless	EUCOMM	PCS00051_A_E10	PG00051_A_4_D03 PGS00051_A_E10 PG00051_A_3_D03	L1L2_gt1	1	3
MGI:1343133	Slc35b1	11	+	72	FALSE	Conditional Ready	Promotorless	EUCOMM	PCS00006_A_B07 PCS00016_A_B07	PG00006_A_3_B05 PG00006_A_4_B05 PGS00006_A_B05 PG00016_B_1_B07 PG00016_B_3_B07 PG00016_B_4_B07 PGS00016_A_B07 PG00016_B_2_B07	L1L2_gt2 L1L2_st2	2	8
MGI:2385166	Slc35c2	2	-	33609	FALSE	Conditional Ready	Promotorless	EUCOMM	PCS00008_A_E08	PG00008_A_4_E08 PGS00008_A_E08	L1L2_gt1	1	2
MGI:1919305	Slc38a10	11	-	160	FALSE	Conditional Ready	Promotorless	EUCOMM	PCS00004_A_E01 PCS00034_A_E01	PG00004_A_1_E01 PG00004_A_2_C02 PG00004_A_2_E01 PG00004_A_3_E01 PG00004_A_4_C02 PG00004_A_4_E01 PGS00004_A_E01 PG00034_A_6_D12 PGS00034_A_E01	L1L2_gt0	2	9
MGI:2148066	Slc38a5	X	+	40643	TRUE	Conditional Ready	Promotorless	EUCOMM	PCS00033_A_D09	PG00033_A_1_D09 PG00033_A_2_D09 PG00033_A_3_D09 PGS00033_A_D09	L1L2_gt1	1	4
MGI:1917056	Slc39a11	11	-	125	FALSE	Conditional Ready	Promotorless	EUCOMM	PCS00004_A_D04 PCS00034_A_D04	PG00004_A_2_D04 PG00004_A_3_D04 PG00004_A_4_D04 PGS00004_A_D04 PG00034_A_1_E09 PG00034_A_3_E09 PG00034_A_4_E09 PG00034_A_6_E09 PG00034_A_7_E09 PG00034_A_8_E09 PGS00034_A_D04 PG00004_A_1_D04 PG00034_A_5_E09	L1L2_gt0 L1L2_st0	2	13
MGI:2139274	Slc39a12	2	+	34052	FALSE	Conditional Ready	Promotorless	KOMP-CSD	PCS00045_A_G10	PG00045_B_2_G10 PGS00045_D_G10 PG00045_B_3_G10 PGS00045_A_G10	L1L2_st1	1	4
MGI:2442940	Slc41a2	10	-	42899	FALSE	Conditional Ready	Promotorless	KOMP-CSD	PCS00041_A_C05	PGS00041_A_C05 PG00041_A_1_C05 PG00041_A_3_C05 PG00041_A_2_C05 PG00041_A_4_C05	L1L2_gt0	1	5
MGI:1918949	Slc41a3	6	+	42749	FALSE	Conditional Ready	Promotorless	KOMP-CSD	PCS00041_A_B05	PGS00041_A_B05 PG00041_A_2_B05	L1L2_gt0	1	2
MGI:1931054	Slc43a3	2	+	43999	FALSE	Conditional Ready	Promotorless	KOMP-CSD	PCS00048_A_C12	PG00048_A_4_C12 PGS00048_A_C12 PG00048_A_2_C12	L1L2_st2	1	3
MGI:2140592	Slc44a1	4	+	36133	FALSE	Conditional Ready	Promotorless	KOMP-CSD	PCS00021_A_H03	PGS00021_B_H03 PG00021_B_1_H03	L1L2_st0	1	2
MGI:1918956	Slc46a3	5	-	46743	FALSE	Conditional Ready	Promotorless	EUCOMM	PCS00062_A_A10	PG00062_A_1_A10	L1L2_st0	1	1
MGI:1914723	Slc47a1	11	-	33798	FALSE	Conditional Ready	Promotorless	EUCOMM	PCS00042_A_D02	PG00042_A_2_D02 PG00042_A_3_D02 PG00042_A_4_D02 PGS00042_A_D02	L1L2_gt0	1	4
MGI:3588190	Slc47a2	11	-	43884	FALSE	Conditional Ready	Promotorless	KOMP-CSD	PCS00045_A_F06	PG00045_A_8_F06 PG00045_D_4_F06 PGS00045_D_F06	L1L2_gt0	1	3
MGI:109393	Slc4a1	11	-	103	FALSE	Conditional Ready	Promotorless	EUCOMM	MOHPC10006_A_H02 MOHPC10006_A_H01 PCS00005_A_C04 PCS00035_A_C04 PCP10002_A_D11 PCP10002_A_D10 PCP10002_A_D09	MOHFA0006_B_2_H02 MOHFA0006_B_3_H02 MOHFA0006_B_4_H01 MOHFA0006_B_4_H02 MOHFA0006_B_5_H02 MOHFA0006_B_6_H02 MOHFA0006_B_8_H01 MOHFA0006_B_8_H02 MOHFAS5006_Z_G06 PG00005_A_1_C04 PG00005_A_2_C04 PG00005_A_3_C04 PGS00005_A_C04 PG00035_A_3_C04 PG00035_A_3_G09 PG00035_A_4_G09 PGS00035_A_C04 PFA0002_A_1_D11 PFA0002_A_3_D10 PFA0002_A_4_D10 PFA0002_A_1_D10 PFA0002_A_3_D09 PFA0002_A_3_D11 PFA0002_A_4_D11 …	L1L2_gt1_Del_LacZ L1L2_gt1	7	40
MGI:2150150	Slc4a10	2	+	34451	FALSE	Conditional Ready	Promotorless	KOMP-CSD	PCS00045_A_D07	PGS00045_D_D07 PG00045_B_3_D07 PGS00045_A_D07 PG00045_B_2_D07 PG00045_B_4_D07 PG00045_B_1_D07	L1L2_gt2	1	6
MGI:1927555	Slc4a4	5	+	44356	FALSE	Conditional Ready	Promotorless	KOMP-CSD	PCS00052_A_F08	PGS00052_A_F08 PG00052_A_7_F08 PG00052_A_4_F08 PG00052_A_8_F08	L1L2_gt2	1	4
MGI:2443220	Slc4a5	6	+	43253	FALSE	Conditional Ready	Promotorless	EUCOMM	PCS00051_A_D10	PG00051_A_3_D10 PG00051_A_4_D10 PGS00051_A_D10	L1L2_gt1	1	3
MGI:1916948	Slc52a3	2	+	41391	FALSE	Conditional Ready	Promotorless	KOMP-CSD	PCS00028_A_D05	PG00028_B_1_D05 PG00028_B_3_D05 PG00028_B_4_D05 PGS00028_A_D05 PG00028_B_2_D05	L1L2_gt0	1	5
MGI:1926089	Slc5a10	11	-	37887	FALSE	Conditional Ready	Promotorless	KOMP-CSD	PCS00020_A_A07	PG00020_A_1_A07 PG00020_A_2_A07 PG00020_A_4_A07 PGS00020_A_A07	L1L2_gt1	1	4
MGI:2138890	Slc5a12	2	+	34812	FALSE	Conditional Ready	Promotorless	KOMP-CSD	PCS00027_A_B07	GR00030_A03	L1L2_gt2	1	1
MGI:2140201	Slc5a9	4	-	41323	FALSE	Conditional Ready	Promotorless	KOMP-CSD	PCS00028_A_E01	PG00028_B_3_E01 PGS00028_A_E01 PG00028_B_2_E01 PG00028_B_1_E01	L1L2_gt0	1	4
MGI:96285	Slc6a4	11	+	346	FALSE	Conditional Ready	Promotorless	EUCOMM	PCS00006_A_F02 PCS00016_A_F02	PG00006_A_4_E05 PGS00006_A_E05 PG00016_B_1_F02 PGS00016_A_F02	L1L2_gt2	2	4
MGI:1347355	Slc7a11	3	-	40212	FALSE	Conditional Ready	Promotorless	EUCOMM	PCS00050_A_G10	PG00050_A_2_G10 PG00050_A_7_G10 PGS00050_A_G10 PG00050_A_1_G10 PG00050_A_8_G10	L1L2_gt2	1	5
MGI:2180781	Slc8b1	5	+	43785	FALSE	Conditional Ready	Promotorless	EUCOMM	PCS00054_B_D12	PG00054_A_2_D12 PG00054_A_4_D12 PGS00054_A_D12	L1L2_st2	1	3
MGI:1924281	Slc9a8	2	+	35621	FALSE	Conditional Ready	Promotorless	KOMP-CSD	PCS00023_E_A10	PG00023_E_4_A10 PGS00023_E_A10	L1L2_gt1	1	2
MGI:1351899	Slco1b2	6	+	44016	FALSE	Conditional Ready	Promotorless	KOMP-CSD	PCS00048_A_D08	PGS00048_A_D08 PG00048_A_4_D08 PG00048_A_2_D07	L1L2_gt1 L1L2_gt0	1	3
MGI:1889679	Slco1c1	6	+	40396	FALSE	Conditional Ready	Promotorless	EUCOMM	PCS00029_A_C08	PG00029_A_2_C08 PGS00029_A_C08 PG00029_A_1_C08	L1L2_gt0	1	3
MGI:1351872	Slco2b1	7	-	42989	FALSE	Conditional Ready	Promotorless	KOMP-CSD	PCS00041_A_H05	PG00041_A_3_H05 PGS00041_A_H05 PG00041_A_2_H05 PG00041_A_1_H05 PG00041_A_4_H05	L1L2_gt0	1	5
MGI:1351867	Slco3a1	7	-	42740	TRUE	Conditional Ready	Promotorless	KOMP-CSD	PCS00041_A_A05	PG00041_A_4_A05 PGS00041_A_A05 PG00041_A_1_A05 PG00041_A_2_A05 PG00041_A_3_A05	L1L2_gt0	1	5
MGI:1351866	Slco4a1	2	+	39525	FALSE	Conditional Ready	Promotorless	EUCOMM	PCS00044_A_F04	PG00044_A_6_F04 PG00044_A_7_F04 PG00044_A_8_F04 PGS00044_A_F04 PG00044_A_5_F04	L1L2_gt1	1	5
MGI:2443431	Slco5a1	1	-	41538	FALSE	Conditional Ready	Promotorless	KOMP-CSD	PCS00028_A_E09	PGS00028_A_E09 PG00028_B_1_E09	L1L2_gt1	1	2
MGI:1329010	Slfn4	11	+	33658	FALSE	Conditional Ready	Promotorless	EUCOMM	PCS00040_A_B12	PG00040_A_1_B12 PG00040_A_3_B12 PG00040_A_4_B12 PGS00040_A_B12 PG00040_A_2_B12	L1L2_gt2	1	5
MGI:106299	Slx4	16	-	39712	FALSE	Conditional Ready	Promotorless	EUCOMM	PCS00019_A_H08	PG00019_A_1_H08 PGS00019_A_H08	L1L2_gt1	1	2
MGI:894293	Smad4	18	-	40156	FALSE	Conditional Ready	Promotorless	EUCOMM	MOHPC10006_A_H07 MOHPC10006_A_H06 PCS00030_B_B07	MOHFA0006_B_1_H07 MOHFA0006_B_3_H07 MOHFA0006_B_7_H06 MOHFA0006_B_2_H07 MOHFA0006_B_4_H07 MOHFA0006_B_5_H07 MOHFA0006_B_6_H07 MOHFA0006_B_8_H07 MOHFA50001_D_1_E01 MOHFA50001_D_7_E01 MOHFA50001_D_2_E01 MOHFA50001_D_4_E01 MOHFA50001_D_3_E01 PG00030_A_1_B07 PG00030_B_2_B07 PG00030_C_1_B07 PG00030_C_3_B07 PGS00030_A_B07 PGS00030_B_B07 PGS00030_C_B07 MOHFAS5006_Z_G08 MOHFA0006_B_1_H06	L1L2_gt1_Del_LacZ L1L2_gt1	3	22
MGI:1917030	Smap2	4	-	479	FALSE	Conditional Ready	Promotorless	EUCOMM	PCS00017_A_G11	PG00017_B_3_G11 PGS00017_A_G11 PG00017_B_2_G12 PG00017_B_3_G12 PG00017_B_1_G12 PG00017_B_4_G12 PG00017_B_4_G11	L1L2_gt1	1	7
MGI:1935129	Smarca5	8	-	42418	FALSE	Conditional Ready	Promotorless	EUCOMM	PCS00037_A_E01	PG00037_A_1_E01 PGS00037_A_E01 PG00037_A_3_E01	L1L2_gt0	1	3
MGI:1203524	Smarcc1	9	+	40293	FALSE	Conditional Ready	Promotorless	EUCOMM	PCS00029_A_A09	PG00029_A_2_A09 PG00029_A_3_A09 PG00029_A_4_A09 PGS00029_A_A09	L1L2_gt0	1	4
MGI:1339795	Smc3	19	+	42972	FALSE	Conditional Ready	Promotorless	EUCOMM	PCS00046_A_F05	PG00046_A_1_F05 PG00046_A_2_F05 PG00046_A_4_F05 PGS00046_A_F05	L1L2_gt1	1	4
MGI:1917349	Smc4	3	+	42883	TRUE	Conditional Ready	Promotorless	EUCOMM	MOHPC10006_A_H09 PCS03009_A_C03	MOHFA0006_A_3_H09 MOHFA0006_A_5_H09 MOHFA0006_A_6_H09 MOHFA0006_A_7_H09 MOHFA0006_A_8_H09 MOHFA0006_B_2_H09 MOHFA0006_B_3_H09 MOHFA0006_B_5_H09 MOHFA0006_B_8_H09 MOHFAS5006_Z_G10 MOHFAS5006_Z_G11 PLBS60002_B_C02 PLB60002_B_1_F08 MOHFA0006_A_4_H09 MOHFA0006_A_1_H09	L1L2_gt1_Del_LacZ pL1L2_GT1_DelLacZ_bsd	2	15
MGI:2144474	Smek2	11	+	33774	FALSE	Conditional Ready	Promotorless	EUCOMM	PCS00040_A_F09	PG00040_A_1_F09 PG00040_A_2_F09 PGS00040_A_F09 PG00040_A_3_F09	L1L2_gt1	1	4
MGI:1921383	Smg8	11	-	54	FALSE	Conditional Ready	Promotorless	EUCOMM	PCS00005_A_B01	PG00005_A_1_B01 PGS00005_A_B01	L1L2_gt1	1	2
MGI:1913541	Smim8	4	-	47134	FALSE	Conditional Ready	Promotorless	EUCOMM	PCS00064_A_H09	PG00064_A_1_H09 PG00064_A_2_H09 PGS00064_A_H09	L1L2_gt0	1	3
MGI:1931437	Smpdl3a	10	+	42539	FALSE	Conditional Ready	Promotorless	KOMP-CSD	PCS00036_A_B12	PG00036_A_3_B12 PGS00036_A_B12 PG00036_A_4_B12 PG00036_A_2_B12	L1L2_st2	1	4
MGI:1916022	Smpdl3b	4	-	39181	FALSE	Conditional Ready	Promotorless	EUCOMM	PCS00011_A_H06 PCS00043_A_H06	PGS00011_A_H06 PG00043_A_3_H06 PG00043_A_4_H06 PGS00043_A_H06 PG00011_A_1_H06 PG00011_A_4_H06	L1L2_gt1 L1L2_st1	2	6
MGI:109490	Sms	X	-	40536	TRUE	Conditional Ready	Promotorless	EUCOMM	PCS00038_A_D05	PG00038_A_2_D05 PG00038_A_3_D05 PGS00038_A_D05	L1L2_gt2	1	3
MGI:1923038	Smurf1	5	-	40514	FALSE	Conditional Ready	Promotorless	EUCOMM	PCS00030_B_A04	PG00030_C_1_A04 PG00030_C_2_A04 PG00030_C_3_A04 PGS00030_C_A04 PG00030_C_4_A04	L1L2_gt2	1	5
MGI:104790	Smyd1	6	-	43228	FALSE	Conditional Ready	Promotorless	EUCOMM	PCS00054_B_D03	PG00054_A_4_D03 PGS00054_A_D03 PG00054_A_2_D03	L1L2_gt2	1	3
MGI:1915889	Smyd2	1	-	39888	FALSE	Conditional Ready	Promotorless	KOMP-CSD	PCS00019_A_G11	PGS00019_A_G11 PG00019_A_4_G11 PG00019_A_3_G11 PG00019_A_2_G11	L1L2_gt2	1	4
MGI:1915889	Smyd2	1	-	47360	FALSE	Conditional Ready	Promotorless	KOMP-CSD	PCS00013_A_C05	PGS00013_A_A07	L1L2_gt2	1	1
MGI:1916976	Smyd3	1	-	39890	FALSE	Conditional Ready	Promotorless	KOMP-CSD	PCS00019_A_F11	PGS00019_A_F11 PG00019_A_3_F11 PG00019_A_4_F11 PG00019_A_1_F11 PG00019_A_2_F11	L1L2_gt2	1	5
MGI:1916976	Smyd3	1	-	47362	FALSE	Conditional Ready	Promotorless	KOMP-CSD	PCS00013_A_D05	PGS00013_A_A08	L1L2_gt2	1	1
MGI:2442796	Smyd4	11	+	338	FALSE	Conditional Ready	Promotorless	EUCOMM	PCS00006_A_E12 PCS00016_A_E12	PLB60002_B_1_G08 PLBS60002_B_A10 PG00016_B_3_E12 PG00016_B_4_E11 PG00016_B_4_E12 PG00016_B_4_F10 PGS00006_A_E03 PGS00016_A_E12	pL1L2_GT2_DelLacZ_bsd L1L2_gt2	2	8
MGI:108048	Smyd5	6	+	39894	FALSE	Conditional Ready	Promotorless	EUCOMM	PCS00019_A_E02	PG00019_A_3_E02 PG00019_A_4_E02 PGS00019_A_E02	L1L2_gt0	1	3
MGI:98331	Snap25	2	+	43932	FALSE	Conditional Ready	Promotorless	KOMP-CSD	PCS00045_A_G02	PG00045_A_6_G02 PG00045_A_7_G02 PG00045_D_1_G02 PG00045_D_3_G02 PGS00045_D_G02 PG00045_A_5_G02	L1L2_gt0	1	6
MGI:1914724	Snap29	16	+	42232	FALSE	Conditional Ready	Promotorless	EUCOMM	PCS00037_A_A03	PG00037_A_1_A03 PG00037_A_2_A03 PG00037_A_4_A03 PGS00037_A_A03 PG00037_A_3_A03	L1L2_gt0	1	5
MGI:2443935	Snapc4	2	-	34162	FALSE	Conditional Ready	Promotorless	KOMP-CSD	PCS00027_A_B09	PGS00027_A_B09 PG00027_B_1_B09	L1L2_gt2	1	2
MGI:1343161	Snf8	11	+	76	FALSE	Conditional Ready	Promotorless	EUCOMM	MOHPC10006_A_H10 MOHPC10006_A_H11 PCS00004_A_C04 PCS00034_A_C04	MOHFA0006_B_1_H10 MOHFA0006_B_2_H10 MOHFA0006_B_3_H10 MOHFA0006_B_3_H11 MOHFA0006_B_4_H10 MOHFA0006_B_5_H11 MOHFA0006_B_6_H11 MOHFA0006_B_7_H10 MOHFA0006_B_7_H11 MOHFA0006_B_8_H10 MOHFA0006_B_8_H11 MOHFAS5006_Z_G12 MOHFAS5006_Z_H01 PLB60002_B_4_A01 PLB60002_B_2_A01 PLBS60002_B_A02 PG00004_A_4_C04 PGS00004_A_C04 PG00034_A_3_F09 PG00034_A_7_F09 PGS00034_A_C04 MOHFA0006_B_6_H10	L1L2_gt0_Del_LacZ pL1L2_GT0_DelLacZ_bsd L1L2_gt0	4	22
MGI:2156003	Snip1	4	+	493	FALSE	Conditional Ready	Promotorless	EUCOMM	PCS00016_A_G07	PG00016_B_1_F07 PG00016_B_1_G07 PG00016_B_2_F07 PG00016_B_2_G07 PG00016_B_3_F07 PG00016_B_3_G07 PG00016_B_4_F07 PG00016_B_4_G07 PGS00016_A_G07	L1L2_gt2	1	9
MGI:1923417	Snrnp35	5	+	42857	TRUE	Conditional Ready	Promotorless	EUCOMM	PCS00050_A_E01	PG00050_A_1_E01 PGS00050_A_E01	L1L2_gt0	1	2
MGI:1917128	Snrpf	10	-	82965	FALSE	Conditional Ready	Promotorless	KOMP-CSD	PCS00082_A_H03	PLBS60002_B_D02	pL1L2_GT0_DelLacZ_bsd	1	1
MGI:101781	Sntb1	15	-	42225	FALSE	Conditional Ready	Promotorless	EUCOMM	PCS00037_A_D07	PG00037_A_4_D07 PGS00037_A_D07 PG00037_A_3_D08	L1L2_gt1 L1L2_gt2	1	3
MGI:1919541	Sntg2	12	-	44285	FALSE	Conditional Ready	Promotorless	KOMP-CSD	PCS00048_A_H04	PGS00048_A_H04 PG00048_A_4_H04	L1L2_gt1	1	2
MGI:1919232	Snx10	6	+	43508	FALSE	Conditional Ready	Promotorless	EUCOMM	PCS00050_A_H02	PG00050_A_1_H02 PG00050_A_2_H02 PG00050_A_3_H02 PG00050_A_6_H02 PG00050_A_7_H02 PG00050_A_8_H02 PGS00050_A_H02 PG00050_A_4_H02	L1L2_gt0	1	8
MGI:2443882	Snx30	4	+	36191	FALSE	Conditional Ready	Promotorless	KOMP-CSD	PCS00021_A_E04	PGS00021_B_E04 PG00021_C_3_E04 PGS00021_A_E04 PG00021_C_1_E04 PG00021_C_2_E04	L1L2_st0 L1L2_gt0	1	5
MGI:1913946	Snx31	15	-	42604	FALSE	Conditional Ready	Promotorless	KOMP-CSD	PCS00041_A_A01	PGS00041_A_A01 PG00041_A_2_A01	L1L2_gt0	1	2
MGI:1916428	Snx5	2	-	35262	FALSE	Conditional Ready	Promotorless	KOMP-CSD	PCS00023_E_C02	PLBS60002_B_B02 PLB60002_B_1_A11 PLB60002_B_2_A11 PLB60002_B_4_A11 PGS00023_E_C02 PG00023_E_3_C02 PG00023_E_2_C02	pL1L2_GT0_DelLacZ_bsd L1L2_gt0	1	7
MGI:1332226	Soat2	15	+	81488	FALSE	Conditional Ready	Promotorless	EUCOMM	PCP10002_A_D12	PFA0002_A_3_D12 PFA0002_A_8_D12 PFA0002_A_5_D12	L1L2_gt0	1	3
MGI:2651588	Socs7	11	+	93	FALSE	Conditional Ready	Promotorless	EUCOMM	PCS00006_A_B10 PCS00016_A_B10	PG00006_A_1_B08 PG00006_A_3_B08 PGS00006_A_B08 PG00016_B_1_B09 PG00016_B_1_B10 PG00016_B_2_B09 PG00016_B_3_B09 PG00016_B_3_B10 PG00016_B_4_B09 PGS00016_A_B10 PG00006_A_4_B08	L1L2_gt2	2	11
MGI:1921684	Sohlh2	3	+	41809	FALSE	Conditional Ready	Promotorless	KOMP-CSD	PCS00031_A_C08	PG00031_B_3_C08 PG00031_A_14_C08 PG00031_A_15_C08 PG00031_A_16_C08 PGS00031_A_C08	L1L2_gt2	1	5
MGI:700014	Sorbs1	19	-	119390	TRUE	Conditional Ready	Promotorless	KOMP-CSD	PCS00126_C_H12	PLB60002_B_2_E12 PLB60002_B_1_D11 PLBS60002_B_D05 PLB60002_B_1_E12	pL1L2_GT1_DelLacZ_bsd	1	4
MGI:109561	Sp100	1	+	49792	FALSE	Conditional Ready	Promotorless	KOMP-CSD	PCS00072_A_H02	MOHFA50001_D_7_A12 MOHFA50001_D_4_B12 MOHFA50001_D_2_B12 MOHFA50001_D_8_A12 MOHFA50001_D_8_B12 MOHFA50001_D_7_B12 MOHFA50001_D_3_B12	L1L2_gt0	1	7
MGI:1914902	Spaca1	4	-	35967	FALSE	Conditional Ready	Promotorless	KOMP-CSD	PCS00021_A_A06	PG00021_B_3_A06 PG00021_C_3_A06 PG00021_C_4_A06 PGS00021_B_A06 PG00021_C_2_A06 PG00021_C_1_A06 PGS00021_A_A06	L1L2_st0 L1L2_gt0	1	7
MGI:1918084	Spag9	11	+	71	FALSE	Conditional Ready	Promotorless	EUCOMM	PCS00016_A_B06	PG00016_B_1_B06 PG00016_B_2_B06 PG00016_B_4_B06 PGS00016_A_B06 PG00016_B_3_B06	L1L2_st2	1	5
MGI:98373	Sparc	11	-	280	FALSE	Conditional Ready	Promotorless	EUCOMM	PCS00004_A_H02 PCS00034_A_H02	PG00004_A_2_H02 PG00004_A_3_H02 PGS00004_A_H02 PG00034_A_3_A11 PGS00034_A_H02 PG00004_A_4_H02	L1L2_gt0 L1L2_st0	2	6
MGI:1918201	Spata1	3	-	41344	TRUE	Conditional Ready	Promotorless	EUCOMM	PCS00033_A_F05	PG00033_A_1_F05 PG00033_A_2_F05 PG00033_A_3_F05 PGS00033_A_F05 PG00033_A_4_F05	L1L2_gt2	1	5
MGI:1927170	Spata5	3	+	35769	FALSE	Conditional Ready	Promotorless	KOMP-CSD	PCS00023_E_E03	PLB60002_B_4_B01 PLB60002_B_3_B01 PLBS60002_B_B03 PGS00023_E_E03 PG00023_E_1_E03 PG00023_E_3_E03 PG00023_E_2_E03	pL1L2_GT0_DelLacZ_bsd L1L2_gt0	1	7
MGI:2442356	Specc1	11	+	33802	FALSE	Conditional Ready	Promotorless	EUCOMM	PCS00011_A_B07 PCS00043_A_B07	PG00011_A_1_B07 PG00011_A_3_F07 PG00011_A_4_B07 PGS00011_A_B07 PG00043_A_3_B07 PGS00043_A_B07	L1L2_gt1	2	6
MGI:1924827	Spns3	11	-	446	FALSE	Conditional Ready	Promotorless	EUCOMM	PCS00007_A_G10	PGS00007_A_G10	L1L2_gt1	1	1
MGI:1924107	Spopl	2	-	39559	FALSE	Conditional Ready	Promotorless	EUCOMM	PCS00043_A_G09	PG00043_A_4_G09 PGS00043_A_G09	L1L2_gt1	1	2
MGI:1921896	Spsb1	4	-	46925	FALSE	Conditional Ready	Promotorless	EUCOMM	PCS00063_A_C04	PG00063_B_1_C04 PG00063_B_2_C04 PG00063_B_3_C04 PG00063_B_4_C04 PGS00063_A_C04	L1L2_gt0	1	5
MGI:98388	Sptbn1	11	-	42043	FALSE	Conditional Ready	Promotorless	EUCOMM	PCS00037_A_D05	PG00037_A_1_D05 PGS00037_A_D05	L1L2_gt1	1	2
MGI:107931	Sqstm1	11	-	55708	FALSE	Conditional Ready	Promotorless	KOMP-CSD	PCS00078_A_B05	PLNS50001_D_C12	L1L2_gt1	1	1
MGI:98397	Src	2	+	39510	FALSE	Conditional Ready	Promotorless	EUCOMM	PCS00044_A_D09	PG00044_A_6_D09 PGS00044_A_D09	L1L2_gt1	1	2
MGI:1933179	Srcin1	11	-	97	FALSE	Conditional Ready	Promotorless	EUCOMM	PCS00005_A_C02 PCS00035_A_C02	PG00005_A_1_C02 PG00005_A_2_C02 PG00005_A_4_C03 PGS00005_A_C02 PG00035_A_1_C02 PG00035_A_2_C02 PG00035_A_4_C02 PGS00035_A_C02 PG00005_A_3_C02	L1L2_gt1	2	9
MGI:1930252	Srd5a3	5	+	43607	FALSE	Conditional Ready	Promotorless	EUCOMM	PCS00046_A_G12	PG00046_A_1_G12 PG00046_A_2_G12 PG00046_A_3_G12 PG00046_A_4_G12 PGS00046_A_G12	L1L2_st2	1	5
MGI:106658	Srf	17	-	81548	FALSE	Conditional Ready	Promotorless	EUCOMM	PCTS00099_A_C04	PLNS50001_D_D01 MOHFA50001_D_2_C07 MOHFA50001_D_3_C07 MOHFA50001_D_6_C07	L1L2_gt0	1	4
MGI:2152938	Srgap3	6	-	43203	FALSE	Conditional Ready	Promotorless	EUCOMM	PCS00054_B_C03	PG00054_A_2_C03 PGS00054_A_C03	L1L2_gt2	1	2
MGI:98419	Sri	5	+	44182	FALSE	Conditional Ready	Promotorless	EUCOMM	PCS00050_A_B07	PG00050_A_1_B07 PG00050_A_2_B07 PG00050_A_7_B07 PG00050_A_8_B07 PGS00050_A_B07 PG00050_A_3_B07 PG00050_A_4_B07	L1L2_gt0	1	7
MGI:1890577	Srsf4	4	+	517	TRUE	Conditional Ready	Promotorless	EUCOMM	PCS00006_A_G12 PCS00016_A_G12	PG00006_A_1_G12 PG00006_A_2_G12 PG00006_A_3_G12 PG00006_A_4_G12 PGS00006_A_G12 PG00016_B_1_G12 PG00016_B_2_G12 PG00016_B_3_G12 PGS00016_A_G12 PG00016_B_3_F11	L1L2_gt2	2	10
MGI:2444061	Ss18l1	2	+	35653	FALSE	Conditional Ready	Promotorless	KOMP-CSD	PCS00023_E_H07	PGS00023_E_H07 PG00023_D_2_H06 PG00023_D_4_H07 PG00023_C_4_H07 PG00023_D_4_H06 PG00023_E_2_H07 PG00023_E_3_H07 PG00023_D_1_H06 PG00023_D_1_H07 PG00023_E_3_H06 PGS00023_A_H07 PG00023_C_1_H06 PG00023_C_1_H07 PG00023_C_2_H07 PG00023_D_3_H06 PG00023_E_1_H06 PG00023_C_4_H06 PG00023_E_4_H06 PG00023_E_4_H07	L1L2_gt0	1	19
MGI:1920040	Ssbp1	6	+	45190	FALSE	Conditional Ready	Promotorless	KOMP-CSD	PCS00055_A_F03	PGS00055_A_F03 PG00055_A_2_F03 PGS00055_B_F03 PG00055_A_4_F03 PG00055_A_2_F02 PG00055_A_1_F03	L1L2_gt1	1	6
MGI:1914220	Ssbp2	13	+	43066	TRUE	Conditional Ready	Promotorless	KOMP-CSD	PCS00041_A_B02	PG00041_A_1_B02 PGS00041_A_B02 PG00041_A_4_B02	L1L2_gt0	1	3
MGI:1099464	Ssr4	X	+	40713	FALSE	Conditional Ready	Promotorless	EUCOMM	PCS00033_A_E11	PG00033_A_1_E11 PG00033_A_2_D11 PG00033_A_3_D11 PG00033_A_3_E11 PG00033_A_1_D11 PGS00033_A_E11	L1L2_st1	1	6
MGI:2443733	Ssu2	6	-	45252	TRUE	Conditional Ready	Promotorless	KOMP-CSD	PCS00055_A_H05	PG00055_A_6_H05 PGS00055_B_H05 PG00055_A_4_H05 PGS00055_A_H05	L1L2_gt2	1	4
MGI:2446700	St18	1	+	43247	FALSE	Conditional Ready	Promotorless	KOMP-CSD	PCS00045_A_E04	PGS00045_A_E04 PG00045_A_8_E04 PG00045_D_4_E04 PGS00045_D_E04 PG00045_B_4_E04	L1L2_gt1	1	5
MGI:1316659	St3gal3	4	-	468	FALSE	Conditional Ready	Promotorless	EUCOMM	PCS00007_A_B11	PGS00007_A_B11	L1L2_gt1	1	1
MGI:108470	St6gal1	16	+	44352	FALSE	Conditional Ready	Promotorless	EUCOMM	PCS00051_A_B12	PG00051_A_4_B12 PGS00051_A_B12 PG00051_A_3_B12	L1L2_st0	1	3
MGI:107553	St6galnac2	11	-	138	FALSE	Conditional Ready	Promotorless	EUCOMM	PCS00016_A_C08	PG00016_B_1_C08 PG00016_B_2_C08 PG00016_B_3_C08 PG00016_B_4_C08 PGS00016_A_C08	L1L2_st2	1	5
MGI:1341894	St6galnac4	2	+	26662	FALSE	Conditional Ready	Promotorless	EUCOMM	PCS00008_A_B06	PG00008_A_1_B06	L1L2_gt0	1	1
MGI:2144518	Stac2	11	-	108	FALSE	Conditional Ready	Promotorless	EUCOMM	PCS00004_A_D01 PCS00034_A_D01	PG00004_A_1_D01 PG00004_A_2_D01 PG00004_A_4_D01 PGS00004_A_D01 PG00034_A_1_E12 PGS00034_A_D01 PG00004_A_3_D01	L1L2_gt0	2	7
MGI:1098583	Stag2	X	+	40522	FALSE	Conditional Ready	Promotorless	EUCOMM	PCS00032_A_D11	PG00032_A_1_D11 PG00032_A_3_D11 PGS00032_A_D11	L1L2_gt0	1	3
MGI:2385331	Stard13	5	-	42024	TRUE	Conditional Ready	Promotorless	KOMP-CSD	PCP10002_A_E03 PCP10002_A_E02 PCS00036_A_D05	PFA0002_A_2_E03 PFA0002_A_3_E02 PFA0002_A_3_E03 PFA0002_A_4_E03 PFA0002_A_5_E03 PFA0002_A_6_E02 PFA0002_A_6_E03 PFA0002_A_7_E02 PFA0002_A_7_E03 PFA0002_A_8_E02 PGS00036_A_D05 PG00036_A_1_D05 PG00036_A_4_D05 PG00036_A_2_D05 PG00036_A_3_D05 PFA0002_A_1_E03 PFA0002_A_5_E02	L1L2_gt1	3	17
MGI:2448556	Stard8	X	+	40987	FALSE	Conditional Ready	Promotorless	EUCOMM	PCS00032_A_E03	PG00032_A_1_E03 PG00032_A_3_E03 PGS00032_A_E03	L1L2_gt0	1	3
MGI:103038	Stat3	11	-	94427	TRUE	Conditional Ready	Promotorless	KOMP-CSD	PCS00097_A_A03	PLNS50001_D_D05 MOHFA50001_D_1_C06 MOHFA50001_D_4_C06 MOHFA50001_D_2_C06	L1L2_gt0	1	4
MGI:103035	Stat5b	11	-	85	FALSE	Conditional Ready	Promotorless	EUCOMM	PCS00006_A_B09 PCS00016_A_B09	PG00006_A_4_B07 PGS00006_A_B07 PG00016_B_1_B08 PGS00016_A_B09 PG00006_A_3_B07	L1L2_gt2	2	5
MGI:1921428	Stk40	4	+	498	FALSE	Conditional Ready	Promotorless	EUCOMM	PCS00007_A_G12	PG00007_B_2_G12 PGS00007_A_G12 PG00007_B_3_G12	L1L2_gt1	1	3
MGI:2388072	Stoml3	3	+	45019	TRUE	Conditional Ready	Promotorless	KOMP-CSD	PCS00055_A_B07	PGS00055_B_B07 PG00055_A_2_B07 PG00055_A_3_B07 PG00055_A_4_B07 PGS00055_A_B07 PG00055_A_1_B07	L1L2_gt1	1	6
MGI:107742	Stra6	9	+	42954	FALSE	Conditional Ready	Promotorless	EUCOMM	PCS00046_A_E10	PG00046_A_1_E10 PG00046_A_2_E10 PG00046_A_3_E10 PG00046_A_4_E10 PGS00046_A_E10	L1L2_gt2	1	5
MGI:2144047	Stradb	1	+	44748	FALSE	Conditional Ready	Promotorless	KOMP-CSD	PCS00052_A_B04	PGS00052_A_B04 PG00052_A_7_B04 PG00052_A_1_B04 PG00052_A_6_B04 PG00052_A_4_B04	L1L2_gt1	1	5
MGI:1333757	Strn	17	-	43076	FALSE	Conditional Ready	Promotorless	KOMP-CSD	PCS00041_A_C04	PG00041_A_3_C04 PGS00041_A_C04 PG00041_A_1_C04 PG00041_A_2_C04	L1L2_gt2	1	4
MGI:2142346	Strn4	7	+	42963	TRUE	Conditional Ready	Promotorless	EUCOMM	PCS00047_A_A02	PG00047_A_2_A02 PG00047_A_3_A01 PGS00047_A_A02 PG00047_A_4_A02	L1L2_gt0	1	4
MGI:1923396	Stx16	2	+	35699	TRUE	Conditional Ready	Promotorless	KOMP-CSD	PCS00023_E_D08	PG00023_D_3_D08 PG00023_C_3_D08 PG00023_E_4_D08 PGS00023_E_D08 PG00023_D_2_D08 PG00023_E_3_D08 PG00023_E_1_D08 PG00023_E_2_D08 PG00023_C_1_D08 PGS00023_A_D08	L1L2_gt0	1	10
MGI:1914977	Stx17	4	+	36100	FALSE	Conditional Ready	Promotorless	KOMP-CSD	PCS00021_A_D03	PGS00021_B_D03 PGS00021_A_D03 PG00021_B_3_E03 PG00021_C_3_D03	L1L2_st0 L1L2_gt0	1	4
MGI:1918366	Stx18	5	+	41896	TRUE	Conditional Ready	Promotorless	KOMP-CSD	PCS00036_A_A12	PG00036_A_2_A12 PG00036_A_3_A12 PGS00036_A_A12 PG00036_A_1_A12	L1L2_gt2	1	4
MGI:1890156	Stx8	11	+	315	FALSE	Conditional Ready	Promotorless	EUCOMM	PCS00006_A_E08 PCS00016_A_E08	PG00006_A_3_D12 PG00006_A_4_D12 PGS00006_A_D12 PG00016_B_1_E08 PG00016_B_1_F08 PG00016_B_2_F08 PG00016_B_3_E08 PG00016_B_3_F08 PG00016_B_4_E08 PG00016_B_4_F08 PGS00016_A_E08 PG00016_B_2_E08	L1L2_gt2	2	12
MGI:107363	Stxbp1	2	-	26688	FALSE	Conditional Ready	Promotorless	EUCOMM	PCS00008_A_D07	PG00008_A_4_D07	L1L2_gt0	1	1
MGI:2443815	Stxbp5l	16	-	43346	FALSE	Conditional Ready	Promotorless	KOMP-CSD	PCS00045_A_C02	PGS00045_D_C02 PGS00045_A_C02 PG00045_A_2_C02 PG00045_D_2_C02 PG00045_A_1_C02 PG00045_B_3_C02 PG00045_B_1_C02 PG00045_B_2_C02 PG00045_A_7_C02 PG00045_D_3_C02 PG00045_A_6_C02 PG00045_A_4_C02	L1L2_gt0	1	12
MGI:1923821	Styxl1	5	-	41689	FALSE	Conditional Ready	Promotorless	KOMP-CSD	PCS00031_A_F06	PG00031_A_1_F06 PG00031_A_4_F06 PGS00031_A_F06 PG00031_A_2_F06 PG00031_A_3_F06	L1L2_gt1	1	5
MGI:1927234	Suclg1	6	+	43472	FALSE	Conditional Ready	Promotorless	EUCOMM	PCS00051_A_C05	PG00051_A_3_C05 PG00051_A_4_C05 PGS00051_A_C05	L1L2_gt1	1	3
MGI:2136282	Sult1b1	5	-	45028	FALSE	Conditional Ready	Promotorless	KOMP-CSD	PCS00055_A_B01	PGS00055_A_B01 PG00055_A_4_B01 PGS00055_B_B01	L1L2_gt0	1	3
MGI:1924221	Sult2a8	7	-	41574	TRUE	Conditional Ready	Promotorless	KOMP-CSD	PCS00028_A_B04	PG00028_B_1_B04 PG00028_B_3_B04 PGS00028_A_B04	L1L2_gt0	1	3
MGI:1924303	Sun1	5	+	43601	FALSE	Conditional Ready	Promotorless	EUCOMM	PCS00054_B_F10	PG00054_A_1_F10 PG00054_A_2_F10 PG00054_A_4_F10 PGS00054_A_F10	L1L2_gt2	1	4
MGI:1202400	Supt5	7	-	192872	FALSE	Conditional Ready	Promotorless	KOMP-CSD	PCS00129_A_E06	MOHFA50001_D_3_H09 MOHFA50001_D_8_H09 MOHFA50001_D_4_H09 PLNS50001_D_E02 MOHFA50001_D_7_H09	L1L2_gt2	1	5
MGI:2441711	Supv3l1	10	-	39898	FALSE	Conditional Ready	Promotorless	EUCOMM	PCS00019_A_G06	PG00019_A_1_G06 PG00019_A_2_G06 PGS00019_A_G06	L1L2_gt1	1	3
MGI:98445	Surf4	2	-	26415	FALSE	Conditional Ready	Promotorless	EUCOMM	PCS00008_A_E06	PG00008_A_2_E06 PG00008_A_3_E06 PG00008_A_4_E06 PGS00008_A_E06 PG00008_A_1_E06	L1L2_gt0	1	5
MGI:1261758	Suz12	11	+	38183	FALSE	Conditional Ready	Promotorless	EUCOMM	PCS00021_A_B10	PG00021_A_1_B10 PG00021_B_2_A10 PG00021_C_3_A10 PGS00021_A_B10 PGS00021_B_B10 PG00021_C_4_A10	L1L2_gt1 L1L2_st1	1	6
MGI:1261758	Suz12	11	+	40078	FALSE	Conditional Ready	Promotorless	EUCOMM	PCS00030_B_D04	PG00030_B_2_D04 PG00030_B_3_D04 PG00030_C_1_D04 PG00030_C_3_D04 PGS00030_B_D04 PGS00030_C_D04	L1L2_gt1	1	6
MGI:1927139	Sv2a	3	+	41051	TRUE	Conditional Ready	Promotorless	EUCOMM	PCS00033_A_D02	PG00033_A_3_D02 PG00033_A_4_D02 PGS00033_A_D02	L1L2_gt1	1	3
MGI:102785	Sva	6	+	45193	FALSE	Conditional Ready	Promotorless	KOMP-CSD	PCS00055_A_G10	PG00055_A_1_F10 PG00055_A_3_G10 PG00055_A_6_G10 PGS00055_B_G10 PG00055_A_1_G10 PGS00055_A_G10	L1L2_st0	1	6
MGI:1918828	Sval1	6	+	45183	FALSE	Conditional Ready	Promotorless	KOMP-CSD	PCS00055_A_C10	PG00055_A_1_C10 PG00055_A_2_C10 PGS00055_B_C10 PGS00055_A_C10	L1L2_st2	1	4
MGI:98450	Svs4	2	-	35553	FALSE	Conditional Ready	Promotorless	KOMP-CSD	PCS00027_A_C05	PGS00027_A_C05 PG00027_B_1_C05	L1L2_st1	1	2
MGI:1920181	Swi5	2	-	39328	FALSE	Conditional Ready	Promotorless	EUCOMM	PCS00026_B_B10	PG00026_A_1_C10 PG00026_B_1_B10 PG00026_B_3_B10 PG00026_B_4_B10 PG00026_B_5_B10 PG00026_B_7_B10 PG00026_B_8_B10 PGS00026_B_B10	L1L2_gt2	1	8
MGI:1915438	Sympk	7	+	42866	FALSE	Conditional Ready	Promotorless	EUCOMM	PCS00047_A_H01	PG00047_A_2_H01 PG00047_A_3_H01 PG00047_A_4_H01 PGS00047_A_H01	L1L2_gt0	1	4
MGI:1916078	Sync	4	+	521	FALSE	Conditional Ready	Promotorless	EUCOMM	PCS00006_A_H01	PG00006_A_1_F10 PG00006_A_2_F10 PG00006_A_3_F10 PG00006_A_3_H01 PG00006_A_4_F10 PG00006_A_4_H01 PGS00006_A_F10 PGS00006_A_H01	L1L2_gt2	1	8
MGI:1328323	Syngr1	15	+	42664	FALSE	Conditional Ready	Promotorless	EUCOMM	PCS00037_A_D11	PG00037_A_4_D11 PGS00037_A_D11	L1L2_gt0	1	2
MGI:2153070	Synpo2	3	-	44538	FALSE	Conditional Ready	Promotorless	EUCOMM	PCS00050_A_A09	PG00050_A_1_A09 PGS00050_A_A09	L1L2_gt2	1	2
MGI:1859546	Syt10	15	-	40283	FALSE	Conditional Ready	Promotorless	EUCOMM	PCS00030_B_F07	PG00030_B_2_F07 PG00030_B_4_F07 PGS00030_B_F07	L1L2_gt1	1	3
MGI:1933365	Sytl1	4	-	44240	FALSE	Conditional Ready	Promotorless	KOMP-CSD	PCS00052_A_C05	PG00052_A_7_C05 PG00052_A_6_C05 PG00052_A_5_C05 PG00052_A_8_C05 PG00052_A_8_H03 PGS00052_A_C05	L1L2_gt2 L1L2_gt1	1	6
MGI:98472	T	17	+	96830	FALSE	Conditional Ready	Promotorless	KOMP-CSD	PCS00101_C_B01 PCP10002_A_E12	MOHFA50001_D_2_C08 PFA0002_A_1_E12	L1L2_gt0	2	2
MGI:1341163	Tacc3	5	+	43478	FALSE	Conditional Ready	Promotorless	EUCOMM	PCS00054_B_B05	PG00054_A_1_B05 PG00054_A_2_B05 PG00054_A_3_B05 PGS00054_A_B05 PG00054_A_4_B05	L1L2_gt2	1	5
MGI:1917457	Taco1	11	+	119	FALSE	Conditional Ready	Promotorless	EUCOMM	PCS00005_A_C08 PCS00035_A_C08	PG00005_A_1_C08 PG00005_A_2_C08 PG00005_A_3_C08 PG00005_A_4_C08 PGS00005_A_C08 PG00035_A_1_C08 PG00035_A_3_C08 PGS00035_A_C08	L1L2_gt1	2	8
MGI:2144471	Tada2a	11	-	44	FALSE	Conditional Ready	Promotorless	EUCOMM	PCS00035_A_A11	PG00035_A_2_A11 PG00035_A_3_A11 PGS00035_A_A11	L1L2_gt1	1	3
MGI:1336878	Taf1	X	+	40957	FALSE	Conditional Ready	Promotorless	EUCOMM	PCS00033_A_B01	PG00033_A_4_B01 PGS00033_A_B01	L1L2_gt0	1	2
MGI:1913500	Taf13	3	+	404	FALSE	Conditional Ready	Promotorless	EUCOMM	PCS00017_A_C04	PGS00017_A_C04 PG00017_B_3_C04	L1L2_gt0	1	2
MGI:107676	Tank	2	+	39336	FALSE	Conditional Ready	Promotorless	EUCOMM	PCS00042_A_C08	PG00042_A_4_C08 PGS00042_A_C08 PG00042_A_1_C08	L1L2_gt0	1	3
MGI:107676	Tank	2	+	39969	FALSE	Conditional Ready	Promotorless	EUCOMM	PCS00019_A_F02	PG00019_A_1_F02 PGS00019_A_F02	L1L2_gt0	1	2
MGI:3041177	Taok3	5	+	234804	FALSE	Conditional Ready	Promotorless	KOMP-CSD	PCTS00200_A_D02	PLBS60002_B_E05 PLB60002_B_4_G02 PLB60002_B_3_G02	pL1L2_GT1_DelLacZ_bsd	1	3
MGI:1923062	Tasp1	2	-	35250	FALSE	Conditional Ready	Promotorless	KOMP-CSD	PCS00021_A_G07	PGS00021_A_G07 PG00021_C_1_G07 PG00021_C_2_G07 PG00021_C_4_G07 PGS00021_B_G07	L1L2_gt0 L1L2_st0	1	5
MGI:98487	Tat	8	+	44693	FALSE	Conditional Ready	Promotorless	KOMP-CSD	PCS00049_A_F05	PG00049_A_1_F05 PG00049_A_5_F05 PGS00049_A_F05 PGS00049_B_F05 PG00049_A_4_F05	L1L2_gt1	1	5
MGI:2144164	Tbc1d10a	11	+	206	FALSE	Conditional Ready	Promotorless	EUCOMM	PCS00006_A_D05 PCS00016_A_D05	PG00006_A_1_C11 PG00006_A_2_C11 PG00006_A_3_C11 PG00016_B_1_D05 PG00016_B_2_D05 PG00016_B_3_D05 PG00016_B_4_D05 PGS00016_A_D05 PGS00006_A_C11	L1L2_gt2	2	9
MGI:2652878	Tbc1d16	11	-	159	FALSE	Conditional Ready	Promotorless	EUCOMM	PCS00005_A_D08 PCS00035_A_D08	PG00005_A_2_D08 PG00005_A_3_D08 PG00005_A_4_D08 PGS00005_A_D08 PG00035_A_1_H07 PG00035_A_2_D09 PGS00035_A_D08 PG00005_A_1_D08	L1L2_gt1	2	8
MGI:1913661	Tbcb	7	-	47283	FALSE	Conditional Ready	Promotorless	EUCOMM	PCS00064_A_C03	PG00064_A_4_C03 PGS00064_A_C03 PG00064_A_1_C03	L1L2_gt0	1	3
MGI:1336172	Tbl1x	X	+	40682	FALSE	Conditional Ready	Promotorless	EUCOMM	PCS00033_A_H08	PG00033_A_2_H08 PGS00033_A_H08	L1L2_gt0	1	2
MGI:2684058	Tbpl2	2	-	34139	TRUE	Conditional Ready	Promotorless	KOMP-CSD	PCS00020_A_D04	PGS00020_A_D04 PG00020_A_1_D04	L1L2_gt0	1	2
MGI:1100877	Tbrg1	9	-	48088	FALSE	Conditional Ready	Promotorless	KOMP-CSD	PCS00067_A_G02	PLBS60002_B_C10 PLB60002_B_3_B11 PLB60002_B_4_B11 PLB60002_B_2_B11 PLB60002_B_1_B11	pL1L2_GT0_DelLacZ_bsd	1	5
MGI:2389465	Tbx22	X	+	41132	FALSE	Conditional Ready	Promotorless	KOMP-CSD	PCS00027_A_E12	GR00031_B01	L1L2_gt2	1	1
MGI:1196908	Tcea3	4	+	47104	FALSE	Conditional Ready	Promotorless	EUCOMM	PCS00063_A_C02	PG00063_B_3_C02 PG00063_B_4_C02 PGS00063_A_C02 MOHFA50001_D_1_B07 MOHFA50001_D_6_B07 MOHFA50001_D_5_B07 MOHFA50001_D_2_B07	L1L2_gt0	1	7
MGI:98510	Tcf3	10	-	173217	FALSE	Conditional Ready	Promotorless	KOMP-CSD	PCS00144_A_G02	PLB60002_B_2_C10 PLBS60002_B_D07	pL1L2_GT0_DelLacZ_bsd	1	2
MGI:98506	Tcf4	18	+	40152	FALSE	Conditional Ready	Promotorless	EUCOMM	PCS00030_B_E07 PCP10002_A_F11	PG00030_C_4_E07 PGS00030_C_E07 PFA0002_A_8_F11 PFA0002_A_7_F11	L1L2_gt1	2	4
MGI:98507	Tcf7	11	-	269	FALSE	Conditional Ready	Promotorless	EUCOMM	PCS00004_A_G07	PG00004_A_2_G07 PG00004_A_3_C10 PG00004_A_3_G07 PG00004_A_4_C10 PGS00004_A_G07	L1L2_gt0	1	5
MGI:1202876	Tcf7l1	6	-	40399	FALSE	Conditional Ready	Promotorless	EUCOMM	PCS00029_A_A04	PG00029_A_1_A04 PG00029_A_2_A04 PG00029_A_3_A04 PG00029_A_4_A04 PGS00029_A_A04	L1L2_gt0	1	5
MGI:98534	Tcn2	11	-	204	FALSE	Conditional Ready	Promotorless	EUCOMM	PCS00005_A_E02	PG00005_A_1_E02 PG00005_A_2_E02 PG00005_A_3_E02 PG00005_A_4_E02 PGS00005_A_E02	L1L2_gt1	1	5
MGI:2444263	Tcp11l1	2	-	34764	FALSE	Conditional Ready	Promotorless	KOMP-CSD	PCS00027_A_C12	PG00027_B_1_C12 PG00027_B_2_C12 PGS00027_A_C12 PG00027_B_3_C12 PG00027_B_4_C12	L1L2_gt2	1	5
MGI:1913311	Tctex1d2	16	+	44164	TRUE	Conditional Ready	Promotorless	EUCOMM	PCS00054_B_C09	PG00054_A_1_C09 PG00054_A_3_C09 PGS00054_A_C09	L1L2_gt2	1	3
MGI:3045358	Tctex1d4	4	+	47095	FALSE	Conditional Ready	Promotorless	EUCOMM	PCS00064_A_F04	PG00064_A_1_F04 PGS00064_A_F04	L1L2_gt0	1	2
MGI:1928486	Tdo2	3	-	41820	TRUE	Conditional Ready	Promotorless	KOMP-CSD	PCS00031_A_E01	PGS00031_A_E01 PG00031_B_2_D02 PG00031_B_2_E01 PG00031_B_2_D01	L1L2_gt0	1	4
MGI:2140279	Tdrd7	4	+	36071	FALSE	Conditional Ready	Promotorless	KOMP-CSD	PCS00021_A_E03	PGS00021_B_E03 PG00021_A_1_E01 PG00021_A_1_E03 PG00021_A_2_E01 PG00021_C_2_E03 PGS00021_A_E03 PG00021_B_2_F05 PG00021_A_2_E03 PG00021_C_3_E03	L1L2_st0 L1L2_gt0	1	9
MGI:106907	Tead4	6	-	43266	FALSE	Conditional Ready	Promotorless	EUCOMM	PCS00201_A_H05	PLBS60002_B_C03	pL1L2_GT1_DelLacZ_bsd	1	1
MGI:2444966	Tecrl	5	-	42923	TRUE	Conditional Ready	Promotorless	KOMP-CSD	PCS00041_A_E05	PG00041_A_2_E05 PG00041_A_3_E05 PGS00041_A_E05 PG00041_A_1_E05	L1L2_gt0	1	4
MGI:1333819	Tekt1	11	-	33818	FALSE	Conditional Ready	Promotorless	EUCOMM	PCS00043_A_H09	PG00043_A_2_H09 PGS00043_A_H09	L1L2_gt1	1	2
MGI:1918968	Telo2	17	-	43325	TRUE	Conditional Ready	Promotorless	EUCOMM	PCS00054_B_A04	PG00054_A_1_A04 PG00054_A_4_A04 PGS00054_A_A04	L1L2_gt2	1	3
MGI:1345185	Tenm1	X	-	40461	FALSE	Conditional Ready	Promotorless	EUCOMM	PCS00029_A_B11	PG00029_A_2_B11 PG00029_A_4_B11 PGS00029_A_B11	L1L2_gt1	1	3
MGI:1345184	Tenm2	11	-	39115	FALSE	Conditional Ready	Promotorless	EUCOMM	PCS00011_A_G10 PCS00043_A_G10	PG00011_A_1_F10 PGS00011_A_G10 PG00043_A_4_G10 PGS00043_A_G10	L1L2_gt1	2	4
MGI:1345183	Tenm3	8	-	40323	FALSE	Conditional Ready	Promotorless	EUCOMM	PCS00030_B_H06	PG00030_B_2_H06 PG00030_B_4_H06 PG00030_C_1_H06 PG00030_C_2_H06 PGS00030_B_H06 PGS00030_C_H06 PG00030_C_4_H06	L1L2_gt1	1	7
MGI:105081	Tes	6	+	43185	FALSE	Conditional Ready	Promotorless	EUCOMM	PCS00054_B_H02	PG00054_A_2_H02 PG00054_A_3_H02 PG00054_A_4_H02 PGS00054_A_H02	L1L2_gt2	1	4
MGI:1930803	Tesc	5	+	40247	FALSE	Conditional Ready	Promotorless	EUCOMM	PCS00029_A_G11	PG00029_A_2_G11 PG00029_A_3_G11 PG00029_A_4_G11 PGS00029_A_G11	L1L2_gt1	1	4
MGI:1344413	Tex10	4	-	44506	FALSE	Conditional Ready	Promotorless	EUCOMM	PCS00050_A_D05	PG00050_A_5_D05 PG00050_A_6_D05 PG00050_A_8_D05 PGS00050_A_D05 PG00050_A_3_D05	L1L2_gt0	1	5
MGI:1933227	Tex14	11	+	58	TRUE	Conditional Ready	Promotorless	EUCOMM	PCS00016_A_B03	PG00016_B_1_B03 PG00016_B_3_C03 PG00016_B_4_C03 PGS00016_A_B03 PG00016_B_3_B03	L1L2_gt2	1	5
MGI:106032	Tfap2c	2	+	115277	FALSE	Conditional Ready	Promotorless	EUCOMM	PCTS00123_A_F03	PLNS50001_D_D08	L1L2_gt1	1	1
MGI:2153466	Tfap2d	1	+	44939	FALSE	Conditional Ready	Promotorless	KOMP-CSD	PCS00052_A_F02	PG00052_A_7_F02 PGS00052_A_F02	L1L2_gt0	1	2
MGI:2679630	Tfap2e	4	-	495	FALSE	Conditional Ready	Promotorless	EUCOMM	PCS00017_A_B07	PG00017_B_2_B07 PGS00017_A_B07 PG00017_B_3_B07 PG00017_B_4_B07	L1L2_gt0	1	4
MGI:107937	Tfb2m	1	-	41608	FALSE	Conditional Ready	Promotorless	KOMP-CSD	PCS00031_A_E09	PG00031_B_2_E09 PGS00031_A_E09	L1L2_gt1	1	2
MGI:104638	Tff3	17	-	39921	FALSE	Conditional Ready	Promotorless	EUCOMM	PCS00019_A_H05	PG00019_A_2_H05 PG00019_A_3_H05 PG00019_A_4_H05 PGS00019_A_H05	L1L2_st1	1	4
MGI:104637	Tgfbr3	5	-	46129	FALSE	Conditional Ready	Promotorless	EUCOMM	PCS00060_A_B11	PG00060_A_3_B11 PGS00060_A_B11	L1L2_st0	1	2
MGI:1915299	Tgif2	2	+	47155	FALSE	Conditional Ready	Promotorless	EUCOMM	PCS00063_A_D09	PG00063_B_2_D09 PGS00063_A_D09	L1L2_gt0	1	2
MGI:3027002	Tgm4	9	+	42596	TRUE	Conditional Ready	Promotorless	KOMP-CSD	PCS00041_A_F02	PG00041_A_2_F02 PGS00041_A_F02 PG00041_A_1_F02	L1L2_gt1	1	3
MGI:1921426	Tgm5	2	-	34999	FALSE	Conditional Ready	Promotorless	KOMP-CSD	PCS00020_A_A06	PG00020_A_2_A06 PGS00020_A_A06	L1L2_gt1	1	2
MGI:3044321	Tgm6	2	+	43832	FALSE	Conditional Ready	Promotorless	KOMP-CSD	PCS00045_A_E02	PGS00045_A_E02 PGS00045_D_E02 PG00045_B_2_E02	L1L2_gt0	1	3
MGI:1922879	Thap8	7	+	42785	FALSE	Conditional Ready	Promotorless	EUCOMM	PCS00050_A_D01	PG00050_A_2_D01 PG00050_A_3_D01 PG00050_A_4_D01 PG00050_A_5_D01 PG00050_A_6_D01 PGS00050_A_D01	L1L2_gt0	1	6
MGI:1919118	Thegl	5	+	45081	FALSE	Conditional Ready	Promotorless	KOMP-CSD	PCS00055_A_E02	PG00055_A_3_E02 PGS00055_A_E02 PG00055_A_2_E02 PG00055_A_6_E02 PGS00055_B_E02 PG00055_A_4_E02	L1L2_gt1	1	6
MGI:1913448	Them5	3	+	44995	FALSE	Conditional Ready	Promotorless	KOMP-CSD	PCS00052_A_E03	PG00052_A_5_E03 PG00052_A_7_E03 PG00052_A_8_E03 PGS00052_A_E03	L1L2_gt0	1	4
MGI:2446213	Themis2	4	-	36858	FALSE	Conditional Ready	Promotorless	KOMP-CSD	PCS00028_A_B08	PG00028_B_1_B08 PG00028_B_4_B08 PG00028_B_3_B08 PGS00028_A_B08	L1L2_gt1	1	4
[truncated: 259 more rows]
