# Supplementary material for: An efficient method for generation of bi-allelic null mutant mouse embryonic stem cells and its application for investigating epigenetic modifiers
Source: Nucleic Acids Res. 2017 Sep 13;45(21):e174. doi: 10.1093/nar/gkx811 (PMC5716182; doi:10.1093/nar/gkx811)
Supplement: Supplementary Data [file gkx811_supp.zip › nar-00912-met-g-2017-File008.xls]

## Sheet: Cbx1 microarray p<0.05
GENE SYMBOL	logFC	AveExpr	adj.P.Val
1700007E06Rik	-1.59537	8.46959	0.000650957
Myl3	-1.56012	8.78748	0.0238139
LOC243881	-1.15608	7.96551	0.00307756
Plcd1	-1.09879	9.31771	0.0238139
Fgf15	-1.02246	8.18656	0.00095293
Cdk5rap1	-0.978051	9.57095	0.00183026
Ndn	-0.940243	9.81668	0.0376607
Serpinf1	-0.853767	10.0551	0.0376607
Lmo2	-0.786633	8.32257	0.0158142
Slc5a4b	-0.774303	7.77245	0.00095293
Hoxb5	-0.72458	7.93462	0.0313142
2700045K19Rik	-0.711981	8.22635	0.017141
H2-Eb1	-0.634359	7.86889	0.0260816
Cnga3	-0.514588	7.70657	0.0369125
Cd47	0.557171	8.16238	0.0238139
Cbx1	0.619225	7.73433	0.0039727
Hist1h4m	0.679702	9.38912	0.0376607
Cdc42ep3	0.958557	8.89753	0.00942951
Dnd1	1.02785	9.69535	0.00128185
9130415E20Rik	1.23448	8.89547	0.00139198
LOC277193	1.25325	9.14999	0.0158142
2610305J24Rik	1.86858	10.1254	0.017141
