# Supplementary material for: An efficient method for generation of bi-allelic null mutant mouse embryonic stem cells and its application for investigating epigenetic modifiers
Source: Nucleic Acids Res. 2017 Sep 13;45(21):e174. doi: 10.1093/nar/gkx811 (PMC5716182; doi:10.1093/nar/gkx811)
Supplement: Supplementary Data [file gkx811_supp.zip › nar-00912-met-g-2017-File009.xls]

## Sheet: Jarid2 microarray p<0.05
GENE SYMBOL	logFC	AveExpr	adj.P.Val
Pem	-2.61936	9.12192	0.00060972
LOC208080	-1.54913	10.1187	0.00416151
LOC380655	-1.51571	8.19621	0.046601
9130417I07Rik	-1.44634	8.06948	0.00646107
Krt1-17	-1.43663	9.62208	0.0497007
Psx2	-1.39119	9.20624	0.00557084
Fhl1	-1.26883	10.5917	0.0355618
2410039E07Rik	-1.19603	9.87365	0.0380394
LOC240677	-1.17952	7.92755	0.0309674
Bmp4	-1.1622	8.28871	0.00100146
Gpx2	-1.16166	10.4235	0.0312644
D11Ertd636e	-1.15438	9.54149	0.00060972
Laptm5	-1.10961	11.4112	0.0273846
Gpt2	-1.07598	10.4046	0.00251219
2310009N05Rik	-1.03152	8.55657	0.00619924
Rog	-0.980178	9.22291	0.00335865
8430410A17Rik	-0.968693	9.72789	0.00557587
2410004F06Rik	-0.95342	11.2265	0.0375748
6330534C20Rik	-0.910219	9.13828	0.0371382
Cbr3	-0.902302	10.2617	0.0272218
Cldn4	-0.900703	11.983	0.0328623
Trib3	-0.86968	9.55994	0.0260719
Pga5	-0.835063	8.94164	0.0185252
Ubd	-0.832029	8.74486	0.0392374
Apoc1	-0.826579	10.7404	0.00670367
Zic3	-0.817657	10.5062	0.0118204
Xbp1	-0.811978	11.5515	0.00906385
Psx1	-0.80138	8.04095	0.0190249
Ssr4	-0.791512	12.4418	0.0152761
6330530A05Rik	-0.786536	8.57468	0.00646107
Sh3tc1	-0.784577	8.53685	0.00121539
Htra1	-0.782173	8.44654	0.000264973
Sfn	-0.778031	8.73769	0.0251912
Slc39a4	-0.776082	9.76511	0.00298454
Npn3	-0.775773	9.58689	0.00646107
Mcts1	-0.767388	11.5028	0.0497007
BC018222	-0.767177	7.78536	5.38608e-05
Niban	-0.761446	8.73225	0.0370146
BC013481	-0.757112	8.90993	0.00121539
Serpinf1	-0.742154	10.0551	0.00265856
Vangl1	-0.73358	8.22189	0.00557084
Ets2	-0.727498	10.1162	0.00416151
G6pdx	-0.726024	9.46964	0.0184242
Bcat1	-0.711099	10.5407	0.00416151
Ubl4	-0.706434	10.0322	0.00370973
LOC545238	-0.706021	7.80347	0.0273692
Ard1	-0.705794	12.1793	0.0424853
5430400N05Rik	-0.70393	10.1518	0.000579602
Dsg2	-0.695234	8.87469	0.00874347
Mvp	-0.695147	9.97195	0.0258442
Abcb1b	-0.686102	8.38219	0.00670367
Mt2	-0.685262	9.59093	0.0361054
Slc10a3	-0.680713	8.29284	0.00150246
3110043J09Rik	-0.673997	8.47536	0.000530624
Mthfd2	-0.672033	11.808	0.0036163
1190002C06Rik	-0.663637	11.1464	0.0203366
Atf4	-0.659999	11.629	0.0260719
5830467J12Rik	-0.656974	8.36321	0.0086666
Pla2g10	-0.653384	10.2054	0.0154178
Adam19	-0.624115	9.74338	0.0101352
AU018091	-0.622128	8.83146	0.0497007
LOC383368	-0.618984	7.6548	0.0424256
Bcap31	-0.607982	9.38412	0.00585719
LOC386218	-0.607405	11.019	0.0355618
LOC383642	-0.606778	7.90848	0.0497007
LOC245128	-0.604738	8.54643	0.0206353
Taz	-0.602782	8.88704	0.0123718
Tcea3	-0.5974	11.7366	0.0312644
Cd59a	-0.588794	9.48484	0.00728048
Lrmp	-0.588261	8.35188	0.0215358
Folr1	-0.587659	9.39668	0.00298454
Atp1b1	-0.586695	10.7609	0.0143391
Smox	-0.585517	8.44002	0.00416151
Pigl	-0.583365	9.91738	0.0100454
Echdc2	-0.582528	10.0915	0.00566844
Pgd	-0.567379	12.3654	0.0100454
Lrrc5	-0.566562	11.5561	0.00298454
Tmem4	-0.565447	10.7465	0.00416151
Chrna9	-0.565229	8.48927	0.00932842
Aldh2	-0.560976	13.027	0.00566844
Steap2	-0.554628	9.05864	0.0105185
C530044N13Rik	-0.552565	9.05327	0.00728048
BC087945	-0.545904	10.372	0.0117651
1700019H03Rik	-0.543989	8.13372	0.00646107
Atox1	-0.54327	11.5069	0.0497007
Aoah	-0.539622	8.29696	0.0107434
Rai14	-0.537622	9.884	0.00335865
Ubl3	-0.536715	10.4895	0.0109929
Pdgfc	-0.532481	7.92221	0.00416151
2310046K01Rik	-0.532018	8.19928	0.0165461
BC065085	-0.520668	7.75695	0.0036163
Axud1	-0.519935	10.3892	0.0248751
Lgals9	-0.518105	8.06007	0.0118204
D0Kist3	-0.507868	9.81505	0.0227913
Col18a1	-0.500737	11.5476	0.0174915
E130012A19Rik	-0.499786	12.0726	0.0371335
Lasp1	-0.499726	11.5969	0.00416151
Lias	-0.499563	10.3887	0.0188627
1200009O22Rik	-0.496605	7.78007	0.00507582
Cdo1	-0.49555	8.72106	0.0478344
9430034D17Rik	-0.492342	8.91078	0.0168008
Zfp296	-0.486321	9.67486	0.00649208
D430044G18Rik	-0.485962	7.80199	0.0102393
Slc1a4	-0.48555	9.50157	0.0460596
Trim25	-0.48305	9.71861	0.00742711
5730543M03Rik	-0.482202	9.28225	0.0332528
LOC277837	-0.48021	8.79381	0.0285962
2310003C23Rik	-0.474147	9.67949	0.00549876
C330016O10Rik	-0.473089	8.24011	0.00670367
Tnfrsf21	-0.461708	8.55965	0.000815281
LOC385530	-0.460531	7.57136	0.0375748
Tpd52l1	-0.459656	8.56555	0.0254776
Msi2h	-0.458786	9.11656	0.00121539
5730449L18Rik	-0.455201	10.0958	0.0497772
Pgrmc1	-0.451362	8.07886	0.0235348
BC055111	-0.450837	7.69341	0.000530624
B4galt1	-0.450547	8.64875	0.00602216
Ddx58	-0.450485	8.09137	0.0473566
Utp14a	-0.449256	8.3069	0.0181658
Mtf2	-0.44732	11.8734	0.0467016
Plaur	-0.446384	7.92339	0.0264123
2410012H22Rik	-0.438505	10.1957	0.016265
Chchd4	-0.436842	11.0846	0.0286196
Trim8	-0.43282	11.4248	0.0253028
Tyk2	-0.431432	8.65156	0.00426071
3110078M01Rik	-0.430602	9.48995	0.0337563
Ckmt1	-0.429793	8.5934	0.0248785
9530048O09Rik	-0.42948	8.34232	0.00426071
Snx11	-0.421431	9.95351	0.0332528
Gm1070	-0.420529	7.86182	0.0151049
Rnu70	-0.41216	8.2843	0.0122582
Lrig1	-0.407397	8.44864	0.0257184
Dgka	-0.403603	8.79562	0.0332528
2700038C09Rik	-0.403233	10.282	0.0346337
Zfp459	-0.402955	8.51277	0.0371335
Nedd4l	-0.401137	9.54286	0.0283645
1110032A13Rik	-0.396217	10.5531	0.0262935
Tcfcp2l2	-0.395615	8.14888	0.0326376
Eps8	-0.395581	8.16177	0.0286196
Ppm1f	-0.394396	9.63022	0.0107434
Nqo2	-0.391994	9.6099	0.0262935
C030027H14Rik	-0.385802	8.14605	0.0185252
Pla1a	-0.384714	8.0954	0.0122582
Piwil2	-0.383749	9.00496	0.0277415
LOC385492	-0.383058	8.52498	0.0328623
Fgf21	-0.381512	7.89683	0.00298454
Cdc23	-0.379962	9.42858	0.00335865
Bid	-0.379235	9.04395	0.0203366
Cdc42se1	-0.378483	8.67016	0.00646107
Arhgap9	-0.377925	7.99797	0.00740689
LOC385493	-0.377439	7.8702	0.0259249
Kctd6	-0.3723	9.90153	0.0154178
1810013L24Rik	-0.369686	9.1822	0.014383
A4galt	-0.363998	8.25426	0.0475948
BC032967	-0.360595	8.09089	0.0496854
6720458D17Rik	-0.357096	8.17042	0.0264254
2410164B09Rik	-0.356302	7.60354	0.0283645
1500001M20Rik	-0.353738	10.7022	0.0212804
2810475A17Rik	-0.35131	9.44556	0.0497007
Zfp213	-0.346938	8.96974	0.0149458
scl0002855.1_1056	-0.34655	8.65798	0.0277244
Cltb	-0.345347	7.91797	0.00670367
2210407N10Rik	-0.342455	7.89631	0.0213065
Zfp275	-0.340496	8.61227	0.0497485
Adora2b	-0.338647	8.11784	0.0491417
Sri	-0.33678	8.45153	0.0148558
1500016H10Rik	-0.335114	10.7789	0.046601
Keap1	-0.333605	9.32617	0.00646107
4930418P06Rik	-0.332016	8.70645	0.0100454
1810054D07Rik	-0.324302	8.37116	0.00867344
Hirip5	-0.32344	8.32097	0.0303714
Slamf9	-0.321067	7.80726	0.0182186
Centb1	-0.312505	7.81737	0.0260719
Gmppb	-0.309302	7.96252	0.0375748
2210401J11Rik	-0.302693	7.59414	0.0105258
Nudt6	-0.297647	8.29459	0.00967935
Limk2	-0.292583	9.25444	0.0328623
Gmfg	-0.290766	8.77827	0.0243419
Tesc	-0.290426	7.99719	0.0273186
LOC384901	-0.286548	7.66164	0.018217
2310042G06Rik	-0.282083	12.1309	0.0249628
LOC386199	-0.281314	7.71045	0.00416151
A630053N20Rik	-0.279721	8.93651	0.0248751
G630016D24Rik	-0.2787	7.68047	0.00867344
4933402E13Rik	-0.276243	7.68853	0.00646107
Vpreb1	-0.273859	7.91698	0.0242006
BC042720	-0.272814	7.53943	0.0496854
4931440B09Rik	-0.271921	8.26	0.0286196
Stard5	-0.26341	8.93746	0.0301551
Tomm40	-0.26208	8.75378	0.0208309
Capn1	-0.25797	8.15078	0.0496874
LOC232680	-0.253023	7.77685	0.0107434
Tada3l	-0.250953	8.33561	0.0346337
Spc18	-0.25081	12.0598	0.0497007
Dab1	-0.248406	8.08895	0.0497007
Eif4el3	-0.245623	11.202	0.0497007
C730033N22Rik	-0.242638	8.03292	0.0309835
4922503E23Rik	-0.242047	7.67669	0.0324878
0610037H22Rik	-0.240775	7.9102	0.0331438
LOC386101	-0.240425	7.745	0.0217537
3010003L21Rik	-0.239427	7.9503	0.0233815
1700123J19Rik	-0.235978	7.80378	0.0154178
Copg	-0.23333	8.89125	0.0490243
2410089K11Rik	-0.233311	8.17328	0.0262935
Mea1	-0.228474	10.5742	0.0349017
LOC194744	-0.228104	7.82254	0.0307006
C730026E21Rik	-0.227536	8.42662	0.0238903
Pafah2	-0.223706	7.92901	0.0478335
Nagk	-0.208303	8.26715	0.0355618
4930502E18Rik	-0.203907	7.57072	0.0298696
Usp26	-0.201272	7.73429	0.0413105
Robo1	-0.182541	7.78531	0.0248751
Six5	0.157879	7.67017	0.0235174
Pip5kl1	0.184242	7.81468	0.0364742
6430526J12Rik	0.188212	7.77392	0.0192434
EG622320	0.198056	7.87382	0.0497007
Cdk5r1	0.206503	8.07524	0.0497007
AB041568	0.211814	7.82709	0.0340193
1200013F24Rik	0.212951	8.83874	0.0496874
Lrrc3	0.215944	7.90349	0.0491417
Acvr1	0.216398	8.41466	0.0413034
Arhgef11	0.219072	9.88051	0.0461602
Galntl1	0.225472	7.81322	0.0309188
Hoxb7	0.226916	7.71471	0.0497007
Troap	0.230871	10.1196	0.0429174
2310040A07Rik	0.231434	7.73739	0.0303714
Hs3st6	0.238953	7.8133	0.0119285
2900074C18Rik	0.239534	7.70339	0.0197983
Ppm1e	0.247983	7.91995	0.0145461
Rasl12	0.248885	7.80583	0.0293806
Trrp1	0.248973	7.95031	0.0195563
5430405G24Rik	0.251277	10.9887	0.0249194
Fchsd2	0.254054	9.78437	0.0497007
B230317C12Rik	0.254188	8.36081	0.0262935
Cpt2	0.254925	10.0738	0.0215358
Zfp90	0.258164	9.04938	0.023285
4930431B11Rik	0.262068	8.08286	0.0328623
Egr2	0.262637	7.63027	0.0109622
Neurog3	0.264268	7.72312	0.0260719
Arl3	0.265533	10.0009	0.0125476
Cyp27a1	0.266165	8.11081	0.0285962
Olfml2b	0.269132	7.80153	0.0478335
Trim41	0.269857	10.1418	0.0225959
Rgl2	0.271433	10.1873	0.0312203
2410019G02Rik	0.272195	8.49425	0.0375748
Rab6ip1	0.275694	8.84915	0.0384378
Zfp69	0.275729	7.96409	0.0496854
Islr2	0.277272	7.94022	0.0345472
Shd	0.283757	8.03882	0.0348015
Gpsn2	0.285248	11.7414	0.0154178
Pacsin1	0.285936	8.29749	0.0168008
3526401B18Rik	0.286022	8.17388	0.040459
Sec61a2	0.286766	10.5239	0.0478335
Kcnh2	0.289155	7.93336	0.0101352
Ctxn	0.291072	7.97328	0.0118204
A530050D06Rik	0.294213	7.95563	0.0277415
Rragb	0.300229	10.3553	0.0312203
G630064H08Rik	0.304624	8.69391	0.0109929
Arpp19	0.30826	9.53505	0.00646107
Fbxo16	0.308557	8.16291	0.0165167
4930432B04Rik	0.308995	10.7082	0.0118204
E430026C09Rik	0.310022	10.9137	0.0212558
D130027M04Rik	0.310298	7.9962	0.0141864
D330016G23Rik	0.310357	8.05844	0.0371382
Ttc3	0.310656	10.2362	0.0233815
Nr2f6	0.312127	9.15454	0.0296632
Mknk2	0.314167	10.404	0.0165461
Sema5b	0.315183	7.83054	0.0258442
2410118P20Rik	0.315382	8.52374	0.0455914
Rab2	0.31546	11.8965	0.0443316
2700055K07Rik	0.315475	7.77511	0.0345242
Acbd6	0.316696	10.1096	0.0375748
Ybx2	0.319753	8.47961	0.0332528
scl0003187.1_40	0.320136	8.78653	0.0303714
8030499H02Rik	0.323068	9.04235	0.0262935
Nkd2	0.323141	8.18567	0.0217537
G630049C14Rik	0.324882	8.43083	0.0365795
Nxph4	0.326703	7.65117	0.00335865
Fhod1	0.328174	9.53743	0.0491417
Gnaz	0.331292	8.66011	0.0475948
Ift81	0.331956	9.09332	0.0145461
Atp2a3	0.332872	7.96286	0.0213898
Sncb	0.334472	7.91203	0.0303714
1700037H04Rik	0.335284	12.4582	0.0206353
LOC382972	0.336986	7.7888	0.00298454
Pank4	0.337326	10.4836	0.0478335
2700045K19Rik	0.338734	8.22635	0.0312203
6720425G15Rik	0.340211	10.2531	0.0491417
LOC382237	0.340588	8.08231	0.00843637
BC017634	0.342692	7.97191	0.0391218
Akt3	0.344404	8.84908	0.0375748
Pdcd4	0.344656	10.4871	0.0350552
BC040823	0.345242	9.75614	0.0259963
Spg7	0.346144	10.2847	0.0414868
Mapre2	0.347865	8.38026	0.0238738
Cbln1	0.348734	8.10293	0.0443316
Gm592	0.349697	9.51801	0.0451414
Sesn1	0.350288	9.45547	0.0424256
LOC268491	0.351257	7.78978	0.0168008
Rab3a	0.351522	7.96491	0.0141864
Pja1	0.353464	9.69962	0.0154178
Fsd1	0.354753	9.03397	0.0323527
Smad4	0.355923	12.1586	0.020798
scl00001.1_0_REVCOMP	0.359921	8.52584	0.0168008
Brp17	0.360983	8.52931	0.0342941
Sox12	0.36131	9.55188	0.0281756
1500011H22Rik	0.362058	10.1155	0.046512
D630045E04Rik	0.362081	9.57984	0.0275048
1110061N23Rik	0.363321	9.78648	0.0154178
Pla2g12a	0.366303	9.53423	0.00742711
Rtn3	0.36684	10.8779	0.0298696
Add3	0.37045	10.0764	0.0355618
Vamp3	0.371409	10.589	0.0101352
Hdac5	0.373172	9.27834	0.0203262
9030624G23Rik	0.373355	8.63839	0.00416151
Spint1	0.374846	11.189	0.0332528
Iqgap2	0.375635	8.8469	0.0286196
Fut10	0.376717	8.02043	0.0100454
Car14	0.377774	7.97503	0.0355618
9530018I07Rik	0.380327	9.12723	0.0312203
Mt3	0.381423	8.50454	0.0491417
P4ha1	0.382306	8.49716	0.0417537
Ddah2	0.38442	9.03235	0.0154178
Flot1	0.389274	9.90129	0.0341052
Ddef2	0.38928	8.81298	0.0302689
Snx21	0.390133	8.80154	0.0478335
Mll5	0.390151	9.18724	0.00796215
LOC245297	0.392701	8.2895	0.0125126
Zfyve21	0.392902	11.9123	0.0376297
Rgs9bp	0.393096	9.40239	0.0213065
LOC269529	0.393149	9.18442	0.0203366
Raver2	0.394331	9.0956	0.0121211
Rtn1	0.396453	8.31043	0.018217
Tagln3	0.398339	7.98407	0.0154178
St5	0.399839	10.5477	0.0375748
2300002D11Rik	0.400805	8.76931	0.0240771
4932417I16Rik	0.405995	9.31504	0.0497007
Srf	0.407826	9.08481	0.0277244
Rasl11b	0.407829	9.51884	0.0365795
5830454D03Rik	0.409092	9.30485	0.0148558
3110018K01Rik	0.409819	8.57173	0.033516
Hist1h1a	0.41176	8.28951	0.0332528
D930002M22Rik	0.412959	8.02315	0.0154178
Zic2	0.41515	8.04905	0.00618413
Efnb1	0.41613	8.16408	0.0189038
9130415E20Rik	0.420357	8.89547	0.0371696
Prkra	0.422997	9.56756	0.00258332
Frat2	0.424415	9.48909	0.0425707
1500001E21Rik	0.429115	9.26687	0.0491417
Phactr4	0.432509	11.1993	0.00191215
Ldh1	0.433752	14.474	0.0413105
Jph3	0.434191	7.91127	0.0101352
Brd3	0.434553	11.4655	0.00728048
Ndrg2	0.434741	8.8404	0.0418
1810073E21Rik	0.437052	9.05305	0.0194182
Anp32a	0.437867	10.2373	0.0473244
Gpi1	0.442414	12.3235	0.0125476
Lrp4	0.443166	8.29069	0.0122582
Irf2bp1	0.443195	9.73614	0.0433418
Glg1	0.444442	12.354	0.0260719
Leprotl1	0.44563	9.82135	0.030777
1810054O13Rik	0.447171	8.55273	0.0127996
Senp3	0.451665	12.5886	0.0332528
Atp1b2	0.45181	8.17835	0.0188627
Lsm6	0.452836	10.3618	0.033516
Pafah1b3	0.462084	10.4427	0.0258442
Rab6b	0.463953	8.54423	0.0412349
6330403K07Rik	0.467104	8.36777	0.0188627
Tspo	0.47399	9.39175	0.0439733
Crsp2	0.479402	8.85255	0.0424256
Stxbp1	0.481054	8.68385	0.00265856
Dnajb1	0.481628	11.5104	0.0101352
Mast3	0.482861	10.1683	0.0443539
Tsnax	0.483755	11.7924	0.0238928
D130071O13Rik	0.48587	9.39932	0.00507582
Rgs11	0.48928	8.19199	0.0184242
Bcl11b	0.495311	8.00355	0.00507582
B230113M03Rik	0.495922	12.3013	0.00416151
Map3k1	0.498596	11.089	0.0354318
Rpl22	0.50336	12.4934	0.0332528
2700017M01Rik	0.506447	11.3305	0.0188627
Pfkl	0.507034	12.7087	0.0385176
Btbd1	0.510189	10.0794	0.00623723
Crabp2	0.51792	8.18196	0.00305326
Stac2	0.51988	8.51742	0.0290288
Pnma2	0.52507	10.1621	0.00102087
Unc13b	0.525894	9.26849	0.000632442
Serinc3	0.527789	9.6826	0.0248751
Zfp537	0.528988	7.92904	0.00549876
2310007H09Rik	0.53036	8.25551	0.0118204
Rnf19	0.533872	11.0603	0.0215358
Vegfb	0.535864	11.596	0.00121539
Sema4a	0.542348	9.1968	0.0478985
Hist1h1b	0.549011	8.48376	0.00937199
Fbxl20	0.54937	10.0104	0.000530624
Apbb1	0.549716	8.92195	0.0262935
Chst1	0.551778	7.92354	0.00646107
Clgn	0.553161	8.28333	0.0401493
Hist1h4a	0.559776	10.604	0.00507868
Hist1h4j	0.569965	10.1579	0.0165966
Gm691	0.574309	8.79369	0.0240693
Gm817	0.575673	8.57642	0.0248751
Dpysl2	0.596449	9.29412	0.0417537
Rpl13a	0.605785	12.2911	0.00534041
Hist1h4k	0.611303	9.16355	0.0293806
BC060615	0.611929	8.78403	0.00646107
Tmed10	0.618019	10.5719	0.0413105
Hist1h3i	0.625999	10.0866	0.0245099
C330008K14Rik	0.626965	9.55019	0.0286196
Sort1	0.627743	9.77568	0.00416151
Mns1	0.629078	10.5539	0.0225959
Plvap	0.629159	8.88689	0.018217
5430406J06Rik	0.629901	10.5506	0.0123567
Acvr2b	0.631436	12.2309	0.0260719
Hist1h3h	0.63263	11.3335	0.0491417
scl0002540.1_6	0.646565	9.82189	0.0203366
Pgm2	0.647985	12.8332	0.0118204
Actn3	0.651674	8.98068	0.0303714
Grina	0.654495	12.1731	0.0496881
B930076A02	0.659021	8.37438	0.00060972
Igfbp2	0.677171	12.2659	0.00416151
Upp1	0.677336	13.4445	0.0268577
Adssl1	0.691761	8.53918	0.0384378
1500031H04Rik	0.69921	9.63579	0.0258442
Syngr3	0.703704	8.6459	0.00060972
Pcyt1b	0.706798	9.67559	0.00905228
Elovl4	0.70746	8.67847	0.0101352
Gadd45g	0.718089	9.77605	0.0323527
Hist1h3e	0.722023	11.9688	0.0491417
LOC236371	0.736135	9.52061	0.0122582
Sv2a	0.75481	8.35759	0.000530624
Mdk	0.756833	12.6441	0.018217
D130017D19Rik	0.763711	10.697	0.0298727
Chst8	0.773272	9.16893	0.000955631
Asphd2	0.785791	9.21478	0.0195563
St6gal1	0.826326	10.2376	0.0286196
Gdf1	0.853657	10.112	0.00123841
Idb2	0.869459	9.48958	0.0331438
Bnip3l	0.887712	11.3976	0.00109848
Eno2	0.89342	8.5887	0.0125476
C330034C07Rik	0.903575	9.80227	0.00375429
Rec8L1	0.914203	9.53904	0.00060972
F2r	0.97009	11.3829	0.0491417
2310056P07Rik	0.995403	12.0991	0.0260719
2600009P04Rik	1.011	9.10431	0.000530624
Olig1	1.12799	11.3034	0.00372684
Slc2a1	1.15374	13.8516	0.00646107
4930583H14Rik	1.18389	11.4733	0.0036163
Prph1	1.28965	8.67094	0.00060972
Lmyc1	1.3516	9.81588	0.00060972
D130083G05Rik	1.36785	11.3296	0.000637989
Fos	1.45327	8.5338	0.00566844
LOC381283	1.86364	10.4853	0.0118041
Egr1	2.06729	10.4735	0.00060972
