# Supplementary material for: An efficient method for generation of bi-allelic null mutant mouse embryonic stem cells and its application for investigating epigenetic modifiers
Source: Nucleic Acids Res. 2017 Sep 13;45(21):e174. doi: 10.1093/nar/gkx811 (PMC5716182; doi:10.1093/nar/gkx811)
Supplement: Supplementary Data [file gkx811_supp.zip › nar-00912-met-g-2017-File010.xls]

## Sheet: Setdb1 microarray DAY 0 p<0.05
GENE SYMBOL	logFC	AveExpr	adj.P.Val
Setdb1	-0.555802	9.14036	3.36369e-08
mtDNA_ND1	0.160226	15.7995	0.00676245
LOC381505	0.227864	8.26611	0.00156606
eGFP	0.242232	8.16455	0.0039655
LOC333190	0.28875	8.96052	0.0108281
Serinc3	0.304379	10.2833	0.00156606
Cdyl2	0.364308	9.24812	0.00156606
LOC380889	0.746675	8.85937	0.0039655
LOC218840	1.00124	9.14877	0.0039655

## Sheet: Setdb1 microarray DAY 2 p<0.05
GENE SYMBOL	logFC	AveExpr	adj.P.Val
Krt42	-1.08315	10.4768	5.29273e-06
Myl4	-1.07388	9.29973	2.16513e-09
Myo1f	-1.00584	9.57607	0.000892589
Laptm5	-0.978922	11.705	3.51647e-05
2210415K03Rik	-0.92903	9.81596	0.000116423
Lama1	-0.902673	9.59284	4.38133e-06
Trh	-0.892153	11.8596	0.00220768
2410039E07Rik	-0.873554	9.81528	1.58397e-05
Krt1-17	-0.832023	9.32214	0.00551002
Phlda2	-0.83073	11.6265	3.82772e-08
2410004A20Rik	-0.815026	9.78782	0.00152081
Setdb1	-0.804768	9.14036	6.83683e-13
D130083G05Rik	-0.778002	10.812	0.000117321
2900078C09Rik	-0.763286	8.84304	1.11042e-05
D11Ertd759e	-0.746201	9.53011	1.61899e-07
Pace4	-0.726644	9.76296	2.91873e-07
9130417I07Rik	-0.72458	8.54293	0.00142666
Cplx1	-0.719851	8.85035	1.00623e-05
Tgm2	-0.694865	8.60098	2.43774e-06
Itpk1	-0.689288	11.1046	1.36203e-05
Npn3	-0.673173	9.38681	1.52098e-12
Sfrp1	-0.672829	9.29179	0.000497279
A130092J06Rik	-0.627341	9.00931	0.00906282
2310046K01Rik	-0.627203	8.72643	2.96083e-07
Ets2	-0.619799	9.8002	8.8815e-06
Crtac1	-0.618753	8.83879	0.000657086
AW046396	-0.60246	9.87489	0.00158582
Zfhx2	-0.589395	9.9531	0.0152524
Sparc	-0.589371	10.1362	0.0213465
Fgf17	-0.586369	8.75232	4.10906e-11
Pgc	-0.582864	8.92745	1.25681e-09
Trf	-0.577671	8.79249	0.018557
Eppk1	-0.57732	9.17169	0.00670931
Lrig3	-0.570282	10.2916	0.000413206
Idb2	-0.566649	9.61814	0.000132898
1110020C13Rik	-0.566287	11.3656	1.808e-07
Alpk3	-0.560845	9.04849	0.000731612
Bhlhb2	-0.556248	9.88671	0.0202856
Tcf15	-0.54957	9.79713	0.0149025
St5	-0.54802	10.3319	0.0275285
D16Ertd472e	-0.541226	9.83417	1.5037e-05
Cobl	-0.535681	9.00547	9.0295e-10
Dtr	-0.532755	8.78805	1.41735e-05
LOC545007	-0.528644	9.84977	0.000678031
Ubd	-0.527603	9.00054	0.00142666
Mapt	-0.522012	8.74125	0.021638
Gfpt2	-0.518124	10.406	9.68656e-07
LOC239102	-0.509908	9.67879	0.0176531
Kdelr3	-0.502948	10.2993	0.0167616
Gm691	-0.502456	8.68797	0.0024511
Ccnd3	-0.502151	11.0482	0.000226967
Ccnd1	-0.49646	11.4917	1.63972e-06
Ier3	-0.495901	10.7182	0.030769
Pcyt1b	-0.489259	9.83084	0.00075423
Rab7l1	-0.486872	8.57633	0.0271039
Capn5	-0.485407	10.7466	7.32365e-05
Tsga2	-0.476226	9.60509	1.72463e-06
Vegfc	-0.475946	9.03631	0.000128522
Csrp1	-0.4729	10.188	0.0178442
Cpe	-0.472013	8.57052	1.11269e-06
Scd1	-0.466578	9.77413	0.00210092
Etv4	-0.462452	10.3476	0.0117579
Abcb1b	-0.462197	8.89881	1.01163e-05
Gpt2	-0.461121	9.96945	0.000228393
Mras	-0.460534	8.42763	9.54845e-08
5430425C04Rik	-0.458939	9.34493	0.0252199
Bach2	-0.449295	9.04871	0.0271039
Pdgfa	-0.449273	11.7853	7.9715e-05
1190002H23Rik	-0.444443	9.98159	0.0456685
Klf4	-0.443355	9.51192	0.000190164
Golph2	-0.439987	10.9533	0.0115655
2410137M14Rik	-0.439357	8.86287	0.000160451
Cited2	-0.437484	9.75577	0.000381587
Htra1	-0.437401	8.87529	0.00192978
Gjb3	-0.427168	11.3132	0.000648997
Fxyd6	-0.426958	11.2689	0.00139495
Cdkn1a	-0.426001	9.79575	0.0271039
1600023A02Rik	-0.424708	12.4012	0.00671353
Cnn3	-0.42324	10.9447	0.0159111
1700037H04Rik	-0.422472	12.2185	0.000534564
Birc7	-0.421935	8.15709	5.7423e-06
Aard	-0.42067	10.4285	0.000355824
2810417H13Rik	-0.419325	10.1909	0.0232326
1190002C06Rik	-0.414928	11.0039	0.0355484
Hes1	-0.413664	8.92873	0.0489434
4933405K07Rik	-0.4105	9.40689	0.00135435
Ass1	-0.408675	10.8996	0.0170606
Hap1	-0.403653	9.02335	8.38275e-10
A630086H07Rik	-0.403269	9.58439	9.72914e-05
E130014J05Rik	-0.401586	9.35013	2.06903e-06
Gsto1	-0.399515	11.1283	0.0103981
Ppic	-0.399292	11.2868	0.0105136
Crym	-0.395532	8.3878	1.86095e-05
Cdo1	-0.391555	8.95851	0.00054237
Dner	-0.388246	8.45889	0.0137501
Sema4a	-0.381557	9.25009	0.0403276
Ppap2a	-0.377222	9.27321	0.00456367
Lrrc34	-0.376824	11.5816	0.00446153
Pdyn	-0.373812	8.32621	7.2742e-07
Slc6a8	-0.372056	10.3408	0.00148741
BC030477	-0.371603	8.32405	2.42522e-06
Prss19	-0.369801	9.02438	0.00150256
Brp17	-0.369228	8.70505	0.000230411
Nanog	-0.369192	11.7211	0.0187773
Lmyc1	-0.368767	9.43652	0.00109665
Acat2	-0.368596	10.3055	0.00131945
Tubb2b	-0.366544	11.9567	0.000160451
Tnfrsf21	-0.364961	8.72136	3.60612e-07
Senp3	-0.363053	12.8368	0.0137518
Tulp2	-0.362924	9.57937	0.00284693
Gababrbp	-0.361441	9.57204	0.0017335
Efs	-0.357789	9.93534	8.87527e-05
Dab2ip	-0.356521	9.29022	0.000128522
Myst4	-0.355421	10.025	0.00746539
Slc39a11	-0.355311	8.99339	7.15909e-05
Dcbld1	-0.352323	9.54157	0.00364267
LOC245350	-0.351538	8.59572	0.000193926
LOC383491	-0.351337	8.47184	0.0220062
Rab27a	-0.350916	10.4256	0.00131895
Cln3	-0.350657	9.33993	0.00142666
Sorl1	-0.348621	8.58607	2.76552e-07
Anp32a	-0.346791	10.2778	8.00237e-05
1110004P15Rik	-0.345875	10.403	0.0133198
Slc11a1	-0.345676	9.2043	0.00128523
Trim8	-0.343838	11.7684	0.0152524
Cd68	-0.343131	9.4275	0.00106557
1110036I07Rik	-0.343004	10.2621	0.0258862
Pgam5	-0.338515	10.6748	0.0135983
1700014P03Rik	-0.333954	8.40248	0.00098491
Rab6b	-0.333814	8.78887	0.000246888
Ddit4l	-0.333281	9.36407	0.000331709
4930422J18Rik	-0.332813	9.17696	0.0321903
Cd81	-0.332298	13.1251	0.000104548
Slco4a1	-0.327681	8.76202	7.70317e-06
D9Ertd280e	-0.32665	9.29039	0.000420559
Homer2	-0.325764	9.53806	0.000204266
Tnip1	-0.325391	9.07336	7.51216e-07
1700019N12Rik	-0.323642	9.2591	0.000503955
Slc39a4	-0.322969	9.63697	0.0421671
Ifitm3	-0.322662	13.4395	0.0105479
Mt3	-0.322589	8.91194	0.0259777
Nudt5	-0.319952	12.0875	0.000224441
Porcn	-0.319634	9.64836	5.89874e-05
Unc13b	-0.318441	9.42036	0.00432675
St3gal3	-0.318305	9.54436	0.000746172
A530050D06Rik	-0.317226	8.25902	0.000284241
Mrps6	-0.317191	10.1278	0.00257129
Ppargc1b	-0.316247	9.2258	0.00294055
Aim1l	-0.315952	9.52137	0.000101056
Sh3tc1	-0.315511	8.50875	1.5037e-05
S100a13	-0.314611	8.88962	0.0396236
Ssbp4	-0.313985	10.2372	0.00712907
Frrs1	-0.313822	10.2825	0.000129834
9130422H11Rik	-0.312261	9.09319	0.0038199
Reep1	-0.311776	8.9649	0.0261945
Brwd1	-0.311099	9.34626	0.000769202
Trim25	-0.311016	10.0161	0.000379207
Spink3	-0.309642	8.6183	0.000156054
Txndc5	-0.308983	10.3136	0.00173318
Zadh2	-0.307523	8.54481	0.000770798
D130003B22Rik	-0.307199	8.74775	0.00696637
Dhrs6	-0.306938	9.30398	0.00153075
Fkbp11	-0.306139	11.281	0.00213316
Tgfb1i4	-0.30561	10.3572	0.0231211
1190017O12Rik	-0.304943	9.78156	0.0271039
Sct	-0.303517	8.82604	0.0277851
Ak3	-0.301801	8.79743	0.000828903
Gcnt2	-0.301607	9.78253	3.83712e-06
Iqgap2	-0.300399	8.97157	0.00720402
Stard8	-0.30013	8.47477	0.0300536
Vegfa	-0.299962	8.83872	6.18687e-06
Nupl2	-0.297489	9.60274	0.0374829
2610033C09Rik	-0.296535	12.4787	0.00214686
Atp5g1	-0.295992	12.9956	0.0277851
BC038156	-0.295866	9.50772	0.000412797
Tnfsf13	-0.294959	9.76961	0.00315464
Jundm2	-0.294228	8.42376	3.3506e-05
1700034H14Rik	-0.293957	9.89145	0.00383363
LOC208080	-0.293858	10.5114	0.00534703
Lrrc28	-0.292696	9.22424	0.000759546
Tek	-0.290298	8.46686	0.000108996
Cish	-0.289738	9.01928	0.00649816
5033414D02Rik	-0.289375	9.77145	0.00111002
Epb4.1l4a	-0.288662	9.73229	0.00565236
Sec14l1	-0.288501	8.59093	1.20039e-05
Arc	-0.287785	8.51962	0.000394425
1700019E19Rik	-0.287	10.2665	0.0299976
Itgb4	-0.285585	8.75944	0.00129278
Rrm2	-0.285562	9.93348	0.000811524
Dync2li1	-0.284697	9.34629	8.89838e-06
Gas6	-0.284648	8.50884	0.00356983
Pnma2	-0.284161	10.7208	0.000595702
E130107N23Rik	-0.2832	10.4262	0.000214463
Pou5f1	-0.282735	13.2584	0.0178442
Chrnb1	-0.282163	9.11229	0.00524288
scl0002855.1_1056	-0.280962	9.03886	0.0126
Esrrb	-0.280683	12.8735	0.0146443
Pfc	-0.279987	9.46545	0.00951902
6230400G14Rik	-0.279843	8.2977	1.0427e-06
Ckb	-0.277813	14.06	0.0235598
Hhex	-0.277588	8.95598	0.000164946
scl0003519.1_175	-0.277402	8.4099	0.0008301
Tubg1	-0.277018	9.80794	0.00171087
Supt3h	-0.276369	10.8484	0.00126442
B4galnt4	-0.27548	8.50889	0.00103345
Mapkapk3	-0.275237	9.79563	0.0183224
Gm484	-0.273005	8.4058	0.000921741
2310007G05Rik	-0.272549	10.1515	0.00671353
Mcam	-0.271615	8.90285	0.00587576
Arhgap30	-0.271564	8.5641	3.3506e-05
Gata2	-0.270403	8.35661	0.00834638
B830028P19Rik	-0.27037	8.83436	0.0053564
Tfdp1	-0.269609	11.5677	0.0304776
C330006A16Rik	-0.269582	9.89377	0.00682035
Ctsc	-0.269542	8.44871	0.00010424
Fgf4	-0.268616	9.77379	0.0251227
D0H4S114	-0.268548	10.6273	0.029978
E330035H20Rik	-0.268297	8.14879	7.62779e-05
D6Wsu176e	-0.267384	10.6298	0.00356969
D10Bwg1379e	-0.266088	8.31138	0.0179933
Abhd4	-0.266056	9.44487	0.0108784
Pdgfc	-0.265479	8.20697	0.000707606
D730049H07Rik	-0.264179	9.26238	0.00742276
LOC385492	-0.262604	8.64749	2.54306e-05
Saa3	-0.261965	8.43511	0.00137924
Gzmm	-0.261832	8.38877	3.98809e-05
Pelo	-0.261583	10.9001	0.00377109
Pigf	-0.259995	11.3378	0.00217967
Itpr1	-0.259234	10.4245	0.000631801
Dpysl3	-0.258352	9.17975	0.00109665
9430034D17Rik	-0.258331	9.30939	0.00101527
1810027O10Rik	-0.258083	11.9431	0.00109668
Siva	-0.257851	13.4754	0.000137747
D330024H06Rik	-0.257367	8.96824	0.0186982
Gpx3	-0.255532	8.68828	0.00451353
1810027I20Rik	-0.255348	8.60265	0.00963517
Nfil3	-0.25439	9.43448	0.000707606
Etsrp71	-0.254318	8.85319	0.00103815
Paf53	-0.253869	10.2611	0.0140817
Aldh4a1	-0.253729	10.5197	0.00148741
Grasp	-0.25365	9.07835	0.000538484
Ndrl	-0.252365	8.96743	0.00868127
Dkk3	-0.25111	8.24489	0.00308942
2900019M05Rik	-0.250063	8.76064	0.00031132
BC035954	-0.249517	9.1635	0.0116445
Fem1b	-0.248745	12.6901	0.00075423
Igfbp4	-0.248354	8.75646	0.00238663
4732455O04Rik	-0.247704	9.02318	0.00428865
Mtch2	-0.24747	11.0351	0.000597573
Atp2a3	-0.246505	8.25857	0.00821108
Isy1	-0.246454	11.7044	0.000930904
Ppap2b	-0.244645	9.42912	0.04328
Cdc5l	-0.243845	11.8453	0.0010588
Echdc2	-0.243767	10.6721	0.0305608
Deb1	-0.243718	11.5939	0.0321807
Fdps	-0.24365	11.5973	0.0160646
Nfkb1	-0.243546	9.26828	0.000280036
Whdc1	-0.242505	9.01051	0.000597272
Ak2	-0.242448	10.9227	0.0139043
Peg3	-0.242316	10.104	0.0160646
Polh	-0.241958	8.98203	0.0415324
A630097D09Rik	-0.241223	9.62576	0.00173516
Chchd4	-0.241152	11.0219	0.00101527
Pip5k2a	-0.240688	9.39456	0.010399
Pola2	-0.2403	10.6504	0.00257129
1810020D17Rik	-0.239974	9.52026	0.0477939
Camta1	-0.239809	9.99368	0.0338609
5430417L22Rik	-0.239517	8.6324	0.00126442
Shmt1	-0.238934	10.3702	0.000373173
2310016C08Rik	-0.2387	9.46449	0.0080825
Ppm1k	-0.238419	8.85695	0.00139188
Sall1	-0.237754	9.01485	0.0185157
Nfatc2ip	-0.237253	9.14765	0.0210697
Nphp4	-0.236969	8.69422	0.0271039
Epb4.9	-0.235672	8.61136	0.00013038
Atp2a2	-0.235127	10.1766	0.0239275
C130064E22Rik	-0.234546	9.02587	0.0221014
LOC383010	-0.234163	9.96357	0.0288818
Tmem2	-0.232879	10.253	0.0227437
Sult4a1	-0.23219	11.6034	0.0282934
Col4a1	-0.231933	9.06762	0.0483907
E030026I10Rik	-0.231524	8.57205	0.00218669
C330001N20Rik	-0.231333	12.1976	0.0195053
C330018L13Rik	-0.230833	9.7854	0.00186961
Arl6	-0.229185	10.0515	0.0399881
Sgk2	-0.229054	8.22524	0.000714499
Rabl4	-0.228553	8.7829	0.0130047
Tmprss5	-0.228369	8.14306	4.94771e-06
Robo1	-0.228097	8.42425	0.000366254
Pim3	-0.227985	11.9863	0.0369925
Nefh	-0.227907	8.55272	0.0358827
Wdr60	-0.227709	8.25871	0.00129769
Atad3a	-0.226763	11.7117	0.0286977
Actn3	-0.226738	8.7505	6.0877e-05
5530400P07Rik	-0.226659	10.7658	0.0300356
Frat2	-0.225329	9.23272	0.0015253
Sri	-0.225091	8.70363	0.000284241
Phf19	-0.225074	8.31224	0.000811524
2610020H15Rik	-0.224793	8.64002	0.00963517
LOC386529	-0.224647	8.49272	0.00895675
Poldip2	-0.224405	11.6983	0.0138331
9030619K07Rik	-0.224348	9.19221	0.00688412
Csnk1e	-0.224216	11.3049	0.00628876
Fmnl2	-0.223215	9.41069	0.00446687
LOC381105	-0.222788	8.42757	0.00197461
2310047C17Rik	-0.222429	8.54188	0.00620385
Calca	-0.222286	9.2729	0.0120363
A430005L14Rik	-0.221967	10.131	0.0116808
AI450948	-0.221911	9.02716	0.00234113
Tgm1	-0.221573	8.72099	0.0480536
Sfrs14	-0.221521	10.2911	0.0294931
Galnt11	-0.221155	9.43449	0.000930904
Fbxo2	-0.220809	9.91898	0.0406876
BC021790	-0.22022	9.01622	0.0353093
Prdm2	-0.220128	10.6703	0.00521044
5730438N18Rik	-0.219352	10.3911	0.00536738
1810055G02Rik	-0.219125	11.3093	0.0256701
2810011L19Rik	-0.219104	8.19937	0.000115783
Rab11fip5	-0.21869	8.75417	0.0231599
Fkbp5	-0.218387	10.4777	0.00148741
Egln3	-0.218021	8.81009	0.00397911
BC017133	-0.217695	10.405	0.0403032
LOC231237	-0.217092	9.1599	0.000881002
Tm4sf6	-0.216762	8.51006	0.00253561
Ivd	-0.216311	9.04865	0.00256645
Usp48	-0.216125	9.94996	0.000211682
Spon2	-0.215952	8.17848	0.0227548
Rbmx	-0.215862	8.32804	0.000991401
5930416I19Rik	-0.215651	11.9652	0.00890274
Lmna	-0.21499	9.83305	0.00960957
Nesg1	-0.214607	8.14789	0.00443527
6330569M22Rik	-0.214488	11.1682	0.0401559
Idh3b	-0.213765	12.0143	0.0492752
Igfals	-0.213582	9.3245	0.000933362
1110030H18Rik	-0.213355	8.35354	0.00612418
Ppm1d	-0.212513	9.1826	0.0360338
Ctnna1	-0.210536	14.0103	0.00449144
Slc35b3	-0.210198	9.11555	0.0179933
Ccdc3	-0.210112	8.69264	0.00294577
Rab8b	-0.209463	9.92521	0.0421671
Tufm	-0.209348	12.766	0.0198011
Padi6	-0.20933	8.31021	0.0163426
Cno	-0.208923	9.3631	0.00435404
Akap11	-0.207642	9.35918	0.0283571
6330580J24Rik	-0.206941	9.27402	0.0167616
Ccdc53	-0.205847	10.1088	0.00619538
Gstt3	-0.205721	8.76361	0.00516011
2410127E18Rik	-0.20556	11.2277	0.0231227
Tes	-0.205263	9.69232	0.0359953
Ndp52	-0.205238	8.48661	0.0403276
1600014C23Rik	-0.205153	8.40933	0.00599687
E230002P03Rik	-0.205008	8.42648	0.0197156
LOC218617	-0.204301	8.17955	0.0149145
2010204K13Rik	-0.204207	9.10074	0.00628119
LOC381591	-0.203581	12.9351	0.0331136
Mdm2	-0.203494	11.2801	0.0480965
Cib1	-0.203475	10.8265	0.0175232
Zbtb7	-0.203379	9.32834	0.0219775
D930046M13Rik	-0.203204	8.32276	0.0410541
Nid1	-0.202381	8.38606	0.0299452
Lancl2	-0.202118	9.15045	0.0178442
AA467197	-0.201871	9.54421	0.049039
3830612M24	-0.201697	8.45584	0.00016402
Arl4	-0.201497	8.5907	0.00153075
Ppef2	-0.201458	8.33046	0.0158808
Smad3	-0.201304	9.137	0.0177028
Epb4.1l4b	-0.201147	9.02979	0.00143074
Gaa	-0.200885	9.19637	0.0435657
2210401J11Rik	-0.200852	8.0567	0.000453738
6330503K22Rik	-0.200806	9.44815	0.0365569
Gnaz	-0.198426	8.70166	0.00787363
Ehd4	-0.197554	10.1811	0.00551002
Prpf18	-0.197482	10.5543	0.0288911
Nrd1	-0.197447	12.2615	0.0210217
2900060P06Rik	-0.197165	8.08235	0.00444854
Ssna1	-0.196045	10.406	0.00537113
Gsta4	-0.195992	12.5236	0.0372897
B230373P09Rik	-0.195629	8.55605	0.0140915
5430440L12Rik	-0.195255	9.41746	0.00119051
Stac2	-0.194979	8.67468	0.0299596
Plekhf1	-0.194916	8.68697	0.0018983
0610039N19Rik	-0.194619	9.0807	0.0148554
Timm10	-0.194576	11.3803	0.00377109
Scamp2	-0.194196	10.7041	0.00995907
Igsf3	-0.194136	10.1186	0.0360534
Ndg2	-0.19364	14.7111	0.0341687
Gtf2f1	-0.19358	9.78661	0.0116808
Nradd	-0.193519	8.58523	0.0399881
Npepl1	-0.193198	9.84757	0.0170606
Pank1	-0.192319	8.74072	0.00576631
D4Ertd432e	-0.19222	8.80926	0.0385335
9330134C04Rik	-0.192189	10.167	0.0237387
Map2k3	-0.192115	11.4738	0.0295729
Sfxn1	-0.191534	12.6317	0.00628119
Zfp296	-0.191331	10.0039	0.0306173
Ubp1	-0.190422	10.5619	0.00521044
Mcee	-0.189593	10.8558	0.0170797
Ryd5	-0.188898	8.11711	0.00222873
BC003251	-0.188374	10.568	0.011113
Sall3	-0.188259	8.28737	0.012633
Btbd12	-0.187516	10.4211	0.00937031
1110029L17Rik	-0.187029	10.5303	0.0101995
Btbd14a	-0.186981	8.57141	0.000137747
A930010I20Rik	-0.186909	9.69192	0.01514
Calm3	-0.186656	12.3543	0.0341687
H6pd	-0.186381	9.25192	0.0213795
Aebp2	-0.185987	9.29748	0.000214463
2010001O09Rik	-0.185669	10.5178	0.00341643
Cdipt	-0.185511	10.0088	0.00536738
Rad51ap1	-0.185368	9.00203	0.00800326
Pkp4	-0.184799	9.97994	0.0292047
Krt10	-0.184425	9.41177	0.00632124
1810037G04Rik	-0.184278	9.84357	0.0315701
Tpst2	-0.183887	10.6985	0.00521044
6330407G11Rik	-0.183513	10.136	0.0185686
H2afj	-0.18351	9.16571	0.00192978
C330006H24Rik	-0.183491	8.31091	6.38245e-05
1700041B20Rik	-0.182457	8.90529	0.0466239
1810038L18Rik	-0.18231	9.41329	0.0465027
Fgf10	-0.182253	8.06332	1.31014e-05
Lmnb2	-0.181523	10.1676	0.0196767
Rpl3l	-0.181345	8.92894	0.0152891
Sdcbp2	-0.181071	8.41795	0.000100303
Dhx38	-0.180632	11.5612	0.0350073
Flrt3	-0.180517	8.43051	0.01573
Amn	-0.180151	8.32968	0.0116808
Guca1a	-0.180136	8.37298	0.0130217
Slc29a1	-0.179881	10.4558	0.0292398
LOC238403	-0.179837	8.00383	0.0323429
Anpep	-0.178901	8.12053	0.0169726
Pex11a	-0.178393	8.63549	0.0175425
Fpgt	-0.178154	8.64411	0.00232305
Ppp2r5c	-0.177668	10.3078	0.00591005
Cd79b	-0.177627	8.09948	0.0021776
Pex11b	-0.177493	10.5071	0.00398703
Col5a1	-0.17736	8.64114	0.0114763
5830409B07Rik	-0.176888	8.27709	0.0330544
BC031601	-0.176833	10.8617	0.000112311
Tnrc6c	-0.176809	9.28628	0.0295729
LOC239122	-0.176686	8.56547	0.00685905
Ttf2	-0.176605	10.661	0.0296234
Snta1	-0.176491	9.07099	0.00139188
Car12	-0.176482	8.14452	0.000530719
LOC382092	-0.175679	14.8201	0.0135863
Ildr1	-0.175527	8.47756	0.00516241
Aatk	-0.175143	8.18363	0.0112439
Zfp592	-0.175131	8.64138	0.0177446
Pter	-0.174973	8.98293	0.0035718
1500031L02Rik	-0.174661	10.0814	0.00100772
Slc25a5	-0.174529	14.697	0.0220402
LOC383712	-0.17427	12.9081	0.0163426
9430023L20Rik	-0.174071	10.8555	0.0341687
Eif2b4	-0.174066	11.3021	0.0147569
Piga	-0.173599	9.43946	0.0261906
D130071O13Rik	-0.17349	9.30575	0.0294576
Got1	-0.17337	8.50625	0.0180509
Myd88	-0.173289	8.77866	0.00347073
2210015K02Rik	-0.173233	8.78911	0.0454521
Arhgap4	-0.172802	8.42266	0.00684195
Ruvbl2	-0.172344	12.3044	0.0271321
Tex264	-0.172271	8.94031	0.0226884
Aldh3a1	-0.172139	8.15188	0.0125461
D5Bwg0834e	-0.171813	10.1507	0.0212647
LOC226135	-0.171544	9.26354	0.0207338
Atp5o	-0.171209	13.0807	0.0395861
Ptp4a3	-0.170926	8.71374	0.0126936
1110018K11Rik	-0.170101	8.1881	0.0252438
BC042423	-0.169417	8.17874	0.0321807
Selenbp1	-0.169158	8.19343	0.0413731
1810008A18Rik	-0.169119	9.65569	0.00392678
Mknk1	-0.1683	8.87992	0.010933
Preb	-0.167939	10.1995	0.0146315
Vcp	-0.167902	13.7438	0.0125089
Trps1	-0.167811	8.72326	0.00384225
Arhgap17	-0.16748	9.77514	0.0101996
Suv420h2	-0.167408	10.8672	0.0204515
Ubtf	-0.166683	9.49801	0.0210697
Ipp	-0.166247	8.81202	0.0319608
Tpcn2	-0.165877	8.31014	0.00431724
Sirt5	-0.165584	8.80882	0.00976479
BC052040	-0.165454	10.5402	0.016509
Apobec3	-0.165191	9.27019	0.0149418
Pdir	-0.16509	9.08146	0.00866007
Rage	-0.165021	8.6747	0.000930904
LOC230075	-0.164716	13.3627	0.0341687
1700024K14Rik	-0.164638	8.69983	0.0436513
Plekhb1	-0.163475	8.48366	0.0421483
5430426F23Rik	-0.163439	8.12162	0.0137518
Zcchc8	-0.163269	10.3437	0.00339395
2700025J07Rik	-0.163089	9.07955	0.0452943
Cyc1	-0.162885	12.6505	0.0414911
Dgkh	-0.16278	8.3904	0.00191929
Jtv1	-0.162589	10.4139	0.0331136
C330027I04Rik	-0.162576	9.24618	0.0142662
Ppa1	-0.162344	14.0714	0.0304081
Cugbp1	-0.161839	10.3444	0.0271039
Luzp1	-0.161162	10.2289	0.0368086
Mapre1	-0.160618	12.9993	0.0118492
Tmem43	-0.159926	9.38208	0.0299976
Zfp423	-0.159457	8.3632	0.0082291
2610207P08Rik	-0.159262	11.2734	0.020984
MGC99845	-0.15907	8.08864	0.0149418
2210419D22Rik	-0.158664	10.7351	0.0252136
Tcfl1	-0.158637	8.90348	0.025325
1110061N23Rik	-0.158213	9.82261	0.0393774
Nrarp	-0.157953	8.59035	0.0331136
Mbc2	-0.157921	9.16052	0.000907351
Nodal	-0.15786	10.6798	0.0323619
Wdr9	-0.157808	8.85995	0.0277646
8030474H12Rik	-0.157251	8.7117	0.0300356
Gapvd1	-0.156959	9.87452	0.00499472
Dmn	-0.156635	8.30968	0.00110126
A930008A22Rik	-0.154773	8.69059	0.00435404
2810046L04Rik	-0.154144	10.1787	0.0139899
Prep	-0.153194	9.44884	0.00380815
Mir16	-0.153127	10.6215	0.040316
Cops4	-0.152799	12.0304	0.0444372
Prdm14	-0.152029	8.10155	0.0277649
Mmp17	-0.151618	8.56789	0.0135863
Pcbd	-0.151616	8.22264	0.0328562
BC004012	-0.151431	11.5228	0.0345357
LOC207939	-0.151106	8.44927	0.0315701
Cbfa2t2h	-0.150985	8.40306	0.00128516
Mrpl10	-0.150712	11.7622	0.0271039
Gig1	-0.150378	8.53643	0.025185
Fgg	-0.149489	8.19818	0.0158808
Stk32a	-0.149445	8.102	8.88178e-05
Gm867	-0.148898	8.17539	0.0311055
C030005I21Rik	-0.148573	8.53157	0.0259911
2610017J04Rik	-0.148175	9.79207	0.0420318
Agps	-0.147481	10.669	0.0077283
Nudc	-0.147193	13.6318	0.0446485
1110036O03Rik	-0.147133	8.17868	0.0250375
Dbr1	-0.146508	11.5118	0.0460068
Gpx1	-0.145827	13.6061	0.0426862
BC038881	-0.145762	8.48735	0.0275285
F630025I20Rik	-0.145737	8.88084	0.0058702
Capg	-0.145721	8.81851	0.0464062
Ncapd2	-0.144851	10.2201	0.0416345
2310022A10Rik	-0.144668	10.1888	0.0195407
D430001F17Rik	-0.144611	8.24984	0.0281446
BC024659	-0.144242	8.74197	0.00435404
Helb	-0.143752	11.2061	0.0341687
Psmd10	-0.142719	10.0656	0.0456685
2810430P21Rik	-0.142503	8.39813	0.0243398
Ubtd1	-0.141879	8.32066	0.0313531
AW538196	-0.141879	9.73605	0.045984
Rnf144	-0.141707	8.68111	0.0162583
Itgb3	-0.141375	8.04413	0.0210498
D5Ertd579e	-0.141073	8.72961	0.0246311
Tmem14c	-0.141037	11.2785	0.044891
Rfx1	-0.140608	8.76628	0.0363944
Tada3l	-0.14044	8.53021	0.0172836
Polrmt	-0.140125	11.1162	0.0383254
Adrb2	-0.139681	8.27324	0.037997
Chn2	-0.139533	8.18707	0.0085284
B130044D17Rik	-0.139435	8.32118	0.0488697
LOC382737	-0.139262	8.40226	0.00291881
Rasa3	-0.139046	8.31905	0.00825332
9930033H14Rik	-0.13816	8.84064	0.0362807
2310047C21Rik	-0.137726	8.41204	0.0208343
LOC217886	-0.137021	8.44118	0.0101605
D230007K08Rik	-0.136707	8.14141	0.020984
Ccdc68	-0.136665	8.08912	0.00793118
E530004K11Rik	-0.136454	8.10737	0.00651473
4732474A20Rik	-0.135706	8.13519	0.0248101
1110057K04Rik	-0.135226	9.87061	0.00679426
Trim6	-0.135018	8.53956	0.0270719
4932416C15Rik	-0.134956	8.28165	0.0123416
LOC333670	-0.134927	8.05866	0.0478255
C1qtnf4	-0.134925	8.28625	0.0444531
Amhr2	-0.134458	8.5703	0.0108784
Stambp	-0.13421	8.67736	0.0474107
B230385N19Rik	-0.13393	8.31774	0.0432352
Gngt2	-0.133862	8.43105	0.0212571
1700013A01Rik	-0.133842	9.5833	0.0220094
Krt1-12	-0.133531	8.0304	0.000648635
Axin	-0.133305	9.72886	0.0324389
2500003M10Rik	-0.133005	12.1064	0.0213612
Napsa	-0.132241	8.1036	0.0124912
Rps6ka2	-0.130671	8.30401	0.0305608
Ard1	-0.130204	12.1145	0.0360556
Psmf1	-0.130064	9.83883	0.0054219
Zfp637	-0.128551	9.05081	0.0215707
Slc6a15	-0.127695	8.41147	0.0348493
BC060631	-0.127433	10.5191	0.0315701
LOC333669	-0.127376	8.09535	0.0431532
D16H22S680E	-0.12722	9.33492	0.0341687
Cryz	-0.127049	8.73721	0.0264515
Rgs16	-0.126928	8.17832	0.0437798
4930417F03Rik	-0.126854	8.16269	0.0321807
LOC381250	-0.125221	8.02448	0.0140457
B230342N21Rik	-0.124844	8.04447	0.0252541
Wipi1	-0.124751	8.86994	0.0307621
Mtf1	-0.124497	8.63135	0.0421506
Gse1	-0.124149	8.61258	0.0395861
Dpysl4	-0.123559	8.20349	0.0021776
D330027H18Rik	-0.123096	8.26905	0.0169777
4932410M19Rik	-0.122526	8.3263	0.031669
Adpn	-0.122502	8.05366	0.0135863
9430038I01Rik	-0.122472	9.10291	0.0161541
C77668	-0.122132	9.63515	0.020398
C130057N11Rik	-0.121647	8.34865	0.0220062
Psma7	-0.121605	13.089	0.0498572
1190009E20Rik	-0.121254	8.90641	0.0210697
Zdhhc6	-0.121226	9.43966	0.0432636
Itga10	-0.121083	8.16945	0.0216824
BC032967	-0.12064	8.38703	0.0474605
Brip1	-0.120367	8.70908	0.0368086
Stat5a	-0.119554	8.14845	0.0471552
Slc41a3	-0.119493	8.07135	0.0466239
Slc4a1	-0.119435	8.03304	0.031669
Ttc19	-0.118619	9.14564	0.0247179
Sh2bpsm1	-0.118472	9.38529	0.0269049
B430320J11Rik	-0.117629	8.02695	0.0342383
Ldlr	-0.117041	8.519	0.0432093
Foxred1	-0.116676	9.2655	0.0266602
1700023O11Rik	-0.116656	10.088	0.0354588
Gusb	-0.116504	9.16173	0.0297369
Ddef1	-0.115195	8.7727	0.0337394
Ift140	-0.115088	8.71449	0.0389674
Tbc1d5	-0.114751	8.30897	0.00884909
Ppp2r5d	-0.114265	9.68816	0.0239982
Cars	-0.114016	8.29936	0.0370456
Gulo	-0.113612	8.08746	0.0340335
Nsep1	-0.113424	14.4988	0.0271816
Mif4gd	-0.112324	10.1138	0.0494216
Gpx6	-0.111831	8.01058	0.00825332
2610524N02Rik	-0.11149	8.19074	0.0343983
Ankrd28	-0.110575	9.31854	0.0167616
BC003324	-0.110154	8.38945	0.00836717
Arhgap1	-0.107823	9.62313	0.0220094
Zfp148	-0.106463	8.85394	0.0271039
Apob48r	-0.105892	8.36634	0.0175707
Rapsn	-0.105227	8.23372	0.0105325
Lip1	-0.10513	8.07588	0.0239275
Cd6	-0.104923	7.98533	0.00328395
Chga	-0.104875	8.09707	0.0299911
Atp8a1	-0.104574	8.154	0.00290138
5330408N05Rik	-0.10292	8.51522	0.0214166
Selenbp2	-0.102894	8.07515	0.00531319
Id2	-0.102221	8.11561	0.0473096
Cx3cl1	-0.101558	8.06567	0.0360358
D11Bwg0517e	-0.101406	8.14522	0.0306125
5730590G19Rik	-0.101378	8.1614	0.0298818
Lu	-0.101374	8.39976	0.0117473
Nupl1	-0.0996871	9.16387	0.0227437
4933440H19Rik	-0.098129	8.19457	0.0172818
Usp52	-0.0974437	9.83698	0.0444188
Siat9	-0.094385	8.27298	0.0482037
Txndc7	-0.0930669	8.15415	0.0469142
Vmd2	-0.0925061	8.0482	0.037914
4732456P10Rik	-0.0910938	8.16076	0.0414911
Rassf4	-0.0899877	8.03758	0.00962209
Mod1	-0.0846874	8.18	0.0477939
Frat1	-0.0838942	8.04067	0.0347909
Idb4	-0.082374	7.98134	0.0209412
Itga6	-0.0728435	8.21531	0.0256613
Trfr2	-0.0719327	7.98308	0.0444188
Polm	0.0716455	8.21158	0.0469142
BC023892	0.0827251	8.12856	0.0399881
Diras2	0.0851322	8.0993	0.046234
LOC385982	0.0863514	8.07561	0.0459222
2810402A17Rik	0.0873682	8.29245	0.0187773
D930024H10Rik	0.0913608	8.1587	0.0412427
Zfp787	0.0918962	8.14275	0.0282934
5031400M07Rik	0.0922184	8.55335	0.0291208
Birc1e	0.0928737	7.94253	0.0073032
Trappc6b	0.093106	8.6566	0.0372897
LOC277506	0.0935146	8.02856	0.0160646
Fthl17	0.0941359	7.96463	0.0210697
Mup1	0.0952862	8.04617	0.0116808
LOC384344	0.09621	8.05787	0.0238239
Zfp78	0.0974036	8.14812	0.0120152
1810022O10Rik	0.0987649	8.69763	0.0161023
Surf6	0.0988219	8.18336	0.0167616
Zfp93	0.100393	8.13287	0.0470656
Nssr	0.100679	8.53996	0.0480536
Ddhd1	0.10098	8.38742	0.0227437
Agmat	0.102467	8.03007	0.0443093
A730024F05Rik	0.103059	8.11872	0.0134606
5031412I06Rik	0.103532	8.07463	0.0250375
LOC385231	0.103836	8.05879	0.0227868
5830467E07Rik	0.103847	8.07484	0.00628876
D130067N22Rik	0.104063	8.01449	0.00496004
A630056H20Rik	0.107498	8.29905	0.00825332
EG623131	0.107893	8.07402	0.0495685
Mtl5	0.108316	8.17174	0.0210217
6430595O10Rik	0.11019	8.25093	0.0252136
4930517K11Rik	0.110733	7.96395	0.0181232
Cacnb3	0.111035	8.1906	0.00431724
Zcchc3	0.111644	9.42839	0.0277851
Inpp5f	0.112155	8.31036	0.0316323
2810021O14Rik	0.112631	9.56555	0.0454521
Mbd1	0.112664	8.34062	0.0101058
D430041B17	0.112893	8.31396	0.0321807
Serinc2	0.113299	8.16	0.0160646
Adra2a	0.113494	8.14746	0.0164506
Plcxd1	0.114911	8.1823	0.0395861
LOC216501	0.115357	8.61936	0.0434503
LOC386121	0.116269	8.14392	0.00937031
LOC245202	0.116332	8.07627	0.0264116
C030011I11Rik	0.116989	8.02012	0.0113614
Mftc	0.117338	8.32214	0.0372897
Syncrip	0.117357	10.1076	0.00727907
Trim33	0.117831	8.99248	0.0197408
D230036B16Rik	0.118577	8.05837	0.0371435
Abi1	0.118967	9.70892	0.032314
Rkhd1	0.118985	8.17263	0.0470576
1110019N10Rik	0.119477	9.74028	0.0213612
D030040K20Rik	0.120426	8.27009	0.0184924
D230050J18Rik	0.121607	8.09359	0.00343014
4921537F17Rik	0.121785	8.14128	0.00717925
Ptms	0.123006	8.63345	0.0430793
Mapk8ip2	0.123649	8.19331	0.0421506
Ppt1	0.124629	8.56484	0.0459129
1200016E24Rik	0.125609	8.39941	0.00640813
Surb7	0.125906	10.4524	0.0206671
Btnl7-pending	0.126192	8.00682	0.00671353
2410193C02Rik	0.126454	8.46616	0.0293666
Zfp346	0.126972	8.41275	0.00315031
Sfrp2	0.127115	8.09111	0.00814169
Pmpcb	0.127739	8.20943	0.0228625
Rps10	0.128143	14.4316	0.0428715
Fundc1	0.128647	9.22799	0.00754809
Galnt1	0.128802	9.50653	0.0295043
Ms4a6d	0.131233	8.11514	0.00272458
Xrn2	0.131832	8.44576	0.00589811
A830033B12Rik	0.13229	7.99409	0.000708781
Tnfrsf19	0.132694	8.03324	0.0022662
Ifngr2	0.132735	8.38253	0.0256613
2810409K11Rik	0.132801	8.09764	0.00083542
Rabgap1	0.133247	9.86817	0.0329123
Gatad1	0.136739	9.49792	0.0234881
4930486L24Rik	0.137111	8.12536	0.0167616
E430030L01Rik	0.137119	10.4372	0.0472984
Tmem17	0.13724	8.41728	0.0259551
AI606181	0.137617	8.01915	0.00630274
Lhfpl2	0.138786	8.51733	0.0236741
LOC383054	0.138817	8.0148	0.00138721
Rb1	0.138859	8.80836	0.0466239
Mus81	0.139	8.71987	0.0220402
C330050A14Rik	0.139441	8.25056	0.0178442
LOC236831	0.139454	13.8546	0.0306173
Mme	0.139704	8.38389	0.00243436
3010015F07Rik	0.139924	8.08945	0.00716206
Rce1	0.140824	9.6732	0.00998064
Efha1	0.141373	8.94564	0.0486722
Plac9	0.142659	8.16691	0.0466239
Serpini1	0.143252	8.1184	0.0350073
Syn1	0.144105	8.69678	0.0410541
2610027C15Rik	0.144272	9.16465	0.0236324
LOC331490	0.144828	8.21121	0.00123532
Ahsg	0.14503	8.03698	0.000381587
2310046O06Rik	0.145407	8.32194	0.0288818
LOC245670	0.145657	8.71963	0.0410541
E430039K05Rik	0.145988	8.90894	0.0410541
Crcp	0.146262	10.1787	0.0259551
AI256775	0.146355	8.67148	0.0359953
Ppa2	0.14656	9.59661	0.0104984
2310015N07Rik	0.147348	9.7485	0.0288858
9630009A08Rik	0.147408	8.34033	0.0137518
Idb3	0.147583	8.40547	0.0421506
Reck	0.147732	8.45589	0.00496006
5430438H03Rik	0.149532	8.98992	0.0246631
Chd1	0.150989	10.1393	0.00239863
1810043J12Rik	0.151103	10.4663	0.0288818
8430410K20Rik	0.151235	11.3184	0.0444792
Heph	0.151828	8.07545	0.000708781
Dnajb6	0.151961	10.5333	0.0259687
4930519F16Rik	0.152094	8.32652	0.0406876
A530090C09Rik	0.152955	9.64887	0.0295729
Gdi3	0.153372	8.57341	0.00670931
St13	0.153798	9.05638	0.0443415
Surf2	0.154176	10.2706	0.0275285
Ym24d07	0.154342	7.98276	0.00199871
5730552M22Rik	0.154486	10.0905	0.0292047
2810457M08Rik	0.155439	8.95209	0.0238419
6030410I10Rik	0.155824	8.17697	0.00392242
LOC330190	0.156004	8.3331	0.00264628
AI747699	0.156321	8.50271	0.0269358
LOC229330	0.157871	8.09463	0.00534703
3110050L10Rik	0.158264	8.28973	0.0277646
Taf9b	0.159386	8.61091	0.0126349
Asb8	0.159717	10.3665	0.0217159
Myl9	0.159817	8.41521	0.0357039
9430081H08Rik	0.160075	8.57925	0.00159513
4933421G18Rik	0.160147	10.8474	0.0355942
Arnt	0.160677	9.30701	0.0181232
LOC385377	0.160701	8.36254	0.0214949
4933406L09Rik	0.161263	8.05379	2.29098e-05
E430036I04Rik	0.161741	8.23509	0.0331136
Bmpr1a	0.161928	8.89113	0.0239275
Popdc3	0.162145	8.05418	0.0031644
1110018J23Rik	0.162691	8.5556	0.020398
LOC385019	0.162814	8.55441	0.0158808
3110070M22Rik	0.163089	8.10146	0.00968177
Rbx1	0.163646	12.5872	0.0203983
Hist1h1a	0.164331	8.3287	0.0392921
Rabep1	0.165616	8.5597	0.000237629
Ppp2cb	0.165966	12.6629	0.049808
2310057G13Rik	0.166276	9.48369	0.0255553
Chchd1	0.16699	14.0511	0.0152891
Gpld1	0.167846	8.54041	0.000341827
LOC280097	0.168122	8.17836	0.00401336
Dmrtc1b	0.168162	8.08235	0.00628876
LOC386117	0.168181	8.28349	0.00999337
Surf5	0.16819	8.59523	0.00937031
9030614H07Rik	0.168551	8.12916	0.00487311
2310004L02Rik	0.170343	10.1788	0.0485298
LOC245676	0.171693	8.35958	0.00341643
2900002G04Rik	0.172698	8.98675	0.00433997
Ilk	0.173066	9.17328	0.00183905
BC055107	0.173074	8.05816	0.00253561
mt-Cytb	0.175293	15.4213	0.0211267
9130011J04Rik	0.175972	8.35588	0.00544366
BC018465	0.176701	8.11806	0.00076399
3110001A13Rik	0.177152	8.52144	0.0238239
Ttyh1	0.177349	8.25107	0.000115783
Spg20	0.178603	8.62179	0.00183905
Utx	0.178975	10.3684	0.000590691
Snx16	0.179724	9.20826	0.0367419
Lsm7	0.179899	13.0002	0.0146315
Tnfsf5ip1	0.180544	10.5856	0.0335344
Pdlim3	0.182426	8.38373	0.0100771
LOC384089	0.182584	8.71856	0.00959953
Ncor1	0.183439	10.4901	0.011813
Rpl35a	0.183749	13.7151	0.00197026
Pi4k2b	0.183877	9.04846	0.0444681
LOC382128	0.183948	10.6361	0.0252136
Slc25a1	0.184127	9.89235	0.0317221
Dlg3	0.184275	9.43448	0.0368086
Gmps	0.184854	8.9982	0.0476016
Akap8l	0.184962	10.4463	0.00352458
Thbs2	0.185927	8.1247	0.0010266
LOC386268	0.186439	8.33403	0.0031481
Ptplb	0.186737	8.88237	0.0213612
Olfml1	0.187941	8.33814	0.0232326
Rnf138	0.187952	8.92376	0.00860126
Mtf2	0.188575	12.4801	0.00413284
Chfr	0.193347	9.97173	0.00333422
0610009B22Rik	0.193367	9.05712	0.00749406
Mov10l1	0.193982	8.25062	0.0283436
D630044F24Rik	0.194349	9.60537	0.0233578
LOC385201	0.194363	7.98826	0.000193926
3002006F17Rik	0.194519	11.2711	0.0119563
LOC380851	0.194974	8.21091	0.00537113
LOC232532	0.195292	8.67424	0.0119563
2010005J08Rik	0.195376	8.28265	0.00074804
Rasa4	0.195721	8.18534	0.0056043
Crtap	0.19646	10.4575	0.0466239
D330004F16Rik	0.197094	8.48845	0.0120363
Shcbp1	0.197628	8.97111	0.00158815
Snrpn	0.198183	12.5348	0.0159588
LOC386270	0.198622	8.83221	0.032314
9230115A19Rik	0.19868	11.8845	0.0168895
Dhrs4	0.198685	8.90062	0.00729171
LOC272713	0.199722	8.15021	0.000811524
D030034I04Rik	0.199858	10.2845	0.0421506
4921518A06Rik	0.200406	11.1147	0.00155268
Sncb	0.200743	8.17954	0.013521
2010001H16Rik	0.200868	8.89453	0.00767262
5730455O13Rik	0.201768	10.2627	0.0300536
Sdhd	0.202084	8.41452	0.0232964
Chtf18	0.203075	10.8629	0.0132226
LOC385065	0.204342	9.65415	0.0180561
Fzd6	0.205226	8.41796	1.10204e-05
Cpt2	0.20526	10.1528	0.0044364
4833442J19Rik	0.205691	8.54768	7.9715e-05
Dnajb11	0.205716	11.233	0.0367129
A030007L17Rik	0.205768	9.21597	0.0487919
A630002K24	0.205998	8.14849	0.00640813
Zfp260	0.206076	10.324	0.000177945
C330021F23Rik	0.206403	8.59283	0.000707606
scl000879.1_2	0.206622	8.17058	0.0228625
LOC56628	0.20746	9.42054	0.0216824
Hist1h4d	0.207801	8.66854	0.0213465
LOC237512	0.208134	13.4207	0.0318789
Mterf-pending	0.208299	9.69309	0.0105382
Sftpd	0.209179	7.98628	0.00160258
LOC385615	0.20921	8.19504	0.000893253
2610009E16Rik	0.209378	9.67656	0.0354588
Ttc17	0.209483	9.25982	0.00214483
Pgbpll	0.20991	9.81224	0.0140918
4932441K18Rik	0.210089	10.2197	0.0203604
Hace1	0.212124	8.84288	0.0326549
Dbp	0.21258	9.29141	0.0415572
1200003C05Rik	0.213952	10.8492	0.00271363
Nrbp	0.214031	8.77771	0.00782068
2700062C07Rik	0.214158	9.56707	0.000707606
A830007N09Rik	0.214366	8.43313	0.0120723
1810022K09Rik	0.214372	12.9082	0.0480536
Arhgef18	0.214441	10.943	0.00100749
Hdac2	0.214504	11.1509	0.007044
Fancl	0.214875	9.36921	0.00158878
2410005G18Rik	0.214968	8.30406	0.000785076
LOC386082	0.215504	9.01163	0.00682035
Dtnb	0.215801	9.13966	0.0432636
LOC386094	0.217418	8.45616	0.000288614
A430038O04Rik	0.217443	8.28474	0.0136526
Slc7a7	0.217662	9.38064	0.0149025
Uhrf2	0.218147	9.92309	0.00847017
Itgb1	0.218398	8.56617	0.000630578
C130072A16Rik	0.219483	9.94975	0.0237067
Hn1	0.220832	12.4643	0.00165113
Mbd3	0.221263	10.604	0.013302
Abp1	0.221529	8.26148	0.00356969
2010005O13Rik	0.221671	9.12542	0.000729537
Sirt1	0.222134	11.1089	0.0116298
Ccbl2	0.222171	8.32632	0.000407918
2610528A15Rik	0.22221	12.2491	0.0458926
Pdhb	0.223357	9.60799	0.00185712
Pnpla6	0.223696	9.11236	0.0134763
Dmrtc2	0.223898	8.15162	0.000263315
B930075F07	0.224886	9.97556	0.0027592
Manea	0.225335	8.79771	0.0254155
Rbbp7	0.225692	12.3126	0.0114123
Carhsp1	0.225728	10.5848	0.01573
Uble1b	0.226046	13.303	0.0236408
D930044O18Rik	0.226302	8.30516	0.000707606
6330403K07Rik	0.226963	8.86176	0.0347909
2310016C16Rik	0.227181	8.93335	0.00336311
Usp14	0.228307	8.63874	6.30482e-05
Stk17b	0.229159	9.60717	0.0190348
Syt9	0.22946	9.56747	0.0350073
Pla1a	0.229461	8.31809	0.00434668
Bdh	0.231468	8.72797	4.30484e-05
LOC381131	0.231482	8.2569	7.02544e-05
Nfkbiz	0.23194	8.82603	0.00291881
1200009C21Rik	0.233208	10.5892	0.0390144
2700038I16Rik	0.233482	9.84792	0.0443918
B230337C21Rik	0.233667	8.2113	0.000119214
Cyp11a1	0.236798	8.37404	8.16194e-05
1500011B03Rik	0.237577	9.19758	0.000800257
Fmn2	0.237703	8.25349	0.000104062
Fxyd5	0.238642	8.19366	3.98744e-06
MTERF	0.238848	10.536	0.00185712
LOC383807	0.238902	8.24423	0.00845027
LOC432879	0.239566	9.24191	0.0247074
LOC237081	0.241098	9.7459	0.0250059
Bglap1	0.241381	8.1334	5.77746e-05
Ndrg2	0.241603	8.8378	0.000860898
Atf3	0.242466	8.2293	0.000171922
1110001C20Rik	0.242559	9.34035	1.10935e-06
LOC380836	0.243004	8.44052	1.81306e-05
Epc1	0.243181	9.17963	3.93106e-06
Rit1	0.243742	9.3939	0.0015965
Mrc1	0.244058	8.5807	0.000731612
Pfn2	0.24523	8.79111	0.000878538
Ddit3	0.247032	9.36103	0.0358519
9830124H08Rik	0.247564	9.75133	0.000492991
Leng5	0.247803	11.3578	0.000974305
Pip5k2c	0.248083	11.1051	0.0464062
Eef1e1	0.24819	11.2296	0.0355484
Adck1	0.24832	8.90499	0.010085
Tpo	0.248401	8.05723	7.10235e-05
LOC226866	0.249186	8.15227	2.22422e-06
4930452B06Rik	0.250222	8.13043	1.91294e-06
E230015L20Rik	0.251684	8.64211	0.0191093
Ccl27	0.252628	9.46311	0.00232305
Adrb3	0.252635	8.41356	0.000823083
Armcx1	0.252983	10.1298	0.0454517
1700008P20Rik	0.253084	8.45539	0.0152524
LOC627585	0.253345	8.36142	0.000106608
Kctd15	0.253572	9.1123	0.000487007
AI597468	0.253873	8.94742	0.00876253
Mlf2	0.254725	12.7261	0.000534564
LOC384087	0.255035	8.35049	0.000236751
1700034P14Rik	0.256436	8.67093	0.000651549
LOC233307	0.257089	8.8145	0.00537118
H2-Eb1	0.257349	8.26392	0.000412797
LOC383619	0.257601	9.2496	5.07312e-05
Ppp1r14a	0.257822	8.40686	0.0307621
2900057D21Rik	0.257914	10.5968	0.0340335
Arid3b	0.258103	10.2546	0.0156931
Ttc29	0.258126	8.32127	0.0119509
Pkia	0.258247	8.53948	0.000305188
Fbxo15	0.258436	12.4493	0.0264384
9030624G23Rik	0.258578	8.68611	2.76552e-07
Dazap2	0.259518	10.1936	0.0039396
Etv5	0.259574	9.99762	0.00178047
Eps8	0.260161	8.73536	0.00818568
Riok3	0.26111	10.8559	0.000979046
Gpbp1	0.263697	10.6667	0.00776253
Slc35b4	0.26387	9.83351	0.00300445
Gtpbp6	0.265091	9.5046	0.0153043
Pdcl	0.267605	9.76787	0.0119563
LOC383483	0.268168	8.67847	0.00887182
LOC236366	0.270005	8.48429	0.000226957
LOC380983	0.271759	12.7615	0.0377313
Cgnl1	0.272426	8.69939	0.00183054
Spin	0.272433	8.61899	1.54077e-06
Rnf103	0.273786	9.35457	0.00247492
Hook3	0.273822	8.34306	0.000211493
LOC381365	0.274642	10.722	0.0133913
LOC208908	0.275229	8.15621	2.62819e-07
Gnai2	0.276621	11.0234	0.000394425
Sulf1	0.277413	8.64373	0.0470576
Zfp219	0.278138	11.0647	1.90842e-05
Pou6f1	0.278306	8.29394	0.00187355
Slc24a6	0.278469	9.48619	0.0228625
BC021395	0.279311	8.67493	0.00112011
LOC245201	0.281133	9.65723	0.00976479
B230214C11Rik	0.281161	8.12693	0.000228589
Ptprk	0.282086	9.39024	0.0297369
Nte	0.282279	9.57237	0.000268206
Nudt9	0.282867	10.1892	0.000945734
LOC380875	0.28298	10.6773	0.0232964
Hist1h2bp	0.283204	10.601	0.0321807
Il7	0.284994	8.09469	4.37376e-09
Raly	0.287388	11.4741	0.0011731
Dutp	0.288073	9.09131	0.000136493
8030451N04Rik	0.290224	11.1932	0.0116808
D0Kist3	0.290378	9.89534	0.0120618
7030401O21Rik	0.29057	9.13542	0.000233402
Plekhm1	0.292261	9.98552	0.033049
LOC332300	0.293378	8.20561	3.02264e-06
2610319K07Rik	0.296213	11.0152	0.0358827
Jph1	0.297873	8.26937	2.49931e-06
Zfp160	0.299062	9.14803	0.00155776
Ube2e1	0.299347	8.81915	0.000688304
BC051019	0.300338	8.47705	0.000297888
Cxxc1	0.300341	10.7465	7.6779e-06
Timm8b	0.30048	13.1049	0.000436856
Casp8	0.30097	8.29464	8.41722e-07
Tspan17	0.301583	9.21747	0.0292171
E130112E08Rik	0.301624	10.3316	0.00625576
EG633640	0.302731	8.59015	0.0149515
Hist1h2bm	0.303697	10.5891	0.0271572
LOC386005	0.304594	10.1588	0.00598644
Suz12	0.304932	12.7397	0.00685905
2610305J24Rik	0.30551	11.8852	0.0146291
2410017P07Rik	0.306778	9.84374	0.00496004
LOC245297	0.307316	8.56306	8.9485e-07
LOC219001	0.308312	8.23146	3.87905e-07
C130038G02Rik	0.308377	8.78654	0.0017335
Tex10	0.308773	9.86189	2.68797e-07
1110051B16Rik	0.308862	8.18197	1.21465e-09
LOC224532	0.309323	9.96933	0.0146291
scl0020042.1_302	0.310952	13.1197	0.0444188
Dtx2	0.311672	9.86822	0.00350053
6030429G01Rik	0.311796	8.3238	1.28972e-05
Amd2	0.312785	9.21844	0.000884753
4732496O08Rik	0.313861	9.64966	1.326e-05
LOC386246	0.314294	9.19435	8.31602e-07
Hip1r	0.314607	8.39828	9.73948e-05
Mad2l1	0.315607	11.6506	0.00151776
Apcdd1	0.315781	8.07376	5.80878e-07
LOC385505	0.316236	12.6071	0.00868127
4931431L11Rik	0.31699	10.9673	0.000101998
AW061290	0.317659	8.24419	2.49947e-07
Wbp2nl	0.317764	8.28123	0.000211682
Tcte1l	0.318025	8.63337	5.13745e-05
Mpv17l	0.319509	8.71826	0.000337408
LOC386199	0.319577	8.67884	0.0238111
C130085G02Rik	0.320286	8.48928	0.0146443
Slc35c1	0.321805	9.22179	0.00352458
Hist1h2bn	0.322488	9.66385	0.0306076
Zic2	0.325223	8.62361	0.000100729
LOC381505	0.326221	8.26611	1.0304e-07
9430069I07Rik	0.326897	7.95942	6.58227e-07
Stk38l	0.328341	8.73661	5.38739e-06
LOC380876	0.329703	8.23676	8.31602e-07
Ghitm	0.330665	9.89262	0.00296966
Il3ra	0.331119	8.75896	0.000275847
0610007P06Rik	0.331618	13.0611	0.0489978
eGFP	0.33246	8.16455	7.85603e-07
E330027G05Rik	0.332521	8.64616	0.0216824
H2-Bl	0.333559	8.72437	4.72541e-05
4921537D05Rik	0.333965	10.9123	0.0039396
2810407C02Rik	0.334358	9.58303	1.36152e-05
Dpep3	0.334624	8.15541	7.67727e-08
Drr1	0.335171	12.9984	0.0258993
Hist1h2bl	0.335451	9.7737	0.0446576
Slc1a4	0.336798	10.1712	0.00709639
C230091E03Rik	0.337464	9.79023	2.9852e-05
Pdk1	0.338289	11.2784	0.0343983
Ank	0.340177	8.99299	0.00551002
LOC380655	0.340414	9.11178	0.00151399
B930008G03Rik	0.34057	10.5892	0.00444352
LOC237954	0.341027	8.14805	2.66774e-07
Fgfbp1	0.341397	8.78539	0.0167613
1700061G19Rik	0.342359	9.53879	0.00853931
5730533P17Rik	0.34324	10.0364	0.0046253
Lemd2	0.343475	10.4866	0.0470576
Papd1	0.346127	9.79559	9.41522e-08
Plekhc1	0.346847	11.9799	0.00111227
BC023928	0.347361	11.0031	0.00670339
LOC382153	0.349171	9.88819	1.53073e-07
Abcc4	0.349204	10.4385	0.00217967
LOC270589	0.350142	8.96314	0.00447933
Dnase2a	0.350362	9.4864	0.00270363
Pdcd4	0.350696	10.5987	7.15909e-05
Dhrsx	0.351271	9.70467	0.000226957
Zfp371	0.35481	8.50064	0.00126321
4833420K19Rik	0.357155	10.0272	0.00274468
Tuft1	0.360018	9.5347	0.0289574
Cldn11	0.360539	8.12293	2.45533e-07
Gm83	0.362103	10.4848	0.000146202
Hist1h2bk	0.362543	10.3598	0.0203159
LOC235860	0.362639	9.50097	0.0217159
Gm347	0.366702	9.18017	1.24655e-05
LOC432637	0.367704	8.73769	1.89215e-06
Ccbl1	0.369988	9.63707	0.0123416
Nqo3a2	0.371167	9.34202	0.0240063
Tex19	0.371639	11.94	0.0276032
Tmem47	0.371685	8.54304	0.000688304
A030012M09Rik	0.372802	8.65735	2.44468e-07
LOC245441	0.372944	8.26767	1.88673e-06
2610305D13Rik	0.373467	10.8342	7.60503e-05
Tuba7	0.374119	8.67319	0.00131895
EG638695	0.374239	8.55634	0.00223415
LOC385177	0.375664	9.33742	0.000358896
Pte2a	0.375738	8.26675	2.36397e-09
Ly6e	0.379282	10.0849	9.68656e-07
Hist1h2bj	0.379733	10.7318	0.0152524
A230091H23	0.383027	7.99608	3.81615e-05
AA536743	0.383837	9.31023	0.00025752
9930020B22Rik	0.385672	8.17698	4.2771e-08
9130011E15Rik	0.3877	8.99842	3.3506e-05
Cox6c	0.388165	13.0253	0.00184309
Mmp12	0.388189	8.34423	1.108e-08
LOC381256	0.389132	8.44184	1.68411e-07
LOC386294	0.389882	9.04006	0.000180008
Tcfap2c	0.390044	11.401	7.40254e-05
Klhl7	0.390655	9.65762	0.000137569
1700012H05Rik	0.391384	10.9686	0.000129786
Tcfl5	0.395198	9.95552	5.27564e-06
Cops7a	0.397073	10.733	9.70525e-06
Itsn1	0.398266	8.27158	2.66774e-07
Hint3	0.399085	10.3738	8.40665e-05
1500010G04Rik	0.39936	8.64151	7.90135e-08
Lass2	0.401699	10.7151	0.0127455
2310001H17Rik	0.401945	8.07903	1.98079e-08
Krtcap3	0.40197	10.5459	0.0477939
Homer3	0.402389	8.78254	0.000579913
Lt1	0.403168	10.6659	3.47617e-07
5730528L13Rik	0.40421	9.56151	0.000217658
Stfa1	0.409514	8.23594	4.77078e-11
Lama3	0.411284	8.52001	0.00401336
Spp1	0.411653	12.0813	0.00670644
LOC209182	0.415542	9.85443	0.00356969
LOC277837	0.423957	10.0142	0.000312109
Manba	0.424315	12.0804	0.00424532
Prnp	0.426006	10.1856	0.00158582
Acp6	0.426241	11.512	0.00984594
AL022832	0.427952	13.736	0.013748
Emid2	0.431271	8.53218	0.0169777
Kctd6	0.432437	10.1806	2.77266e-06
Ddef2	0.43445	9.34395	2.62513e-08
Psme4	0.434975	12.4465	1.01126e-05
Adprh	0.436229	12.0312	7.15909e-05
D030063E12	0.436494	9.34349	0.000691928
Nxt2	0.445182	11.3677	1.23197e-05
Fetub	0.445187	8.83887	1.70994e-08
LOC272693	0.446099	8.09745	4.46671e-09
Stx7	0.448208	10.3696	0.0113614
Ddhd2	0.448226	10.5073	0.00491199
D030067L12Rik	0.451171	8.69668	7.19393e-05
Mrps24	0.455669	14.0217	7.10673e-06
Aox3	0.46162	8.40529	3.61015e-05
AU022751	0.462529	9.02983	0.000231386
2410039M03Rik	0.466571	8.98882	6.45894e-08
Akr1e1	0.469573	8.48915	3.65435e-07
LOC208748	0.470985	8.94795	6.00341e-05
LOC385877	0.475966	9.83276	0.000389545
Tdrd3	0.477792	8.70641	9.96206e-10
LOC385114	0.48172	8.89469	6.0877e-05
Tmem20	0.481886	9.08137	1.71422e-06
2310001H12Rik	0.482747	9.31785	2.90938e-06
E030025D05Rik	0.48456	8.2237	1.64534e-10
Cdyl2	0.487589	9.24812	1.84838e-07
E430033B07Rik	0.48873	9.96708	6.2886e-06
LOC333751	0.489696	10.8096	0.000222179
9030025P20Rik	0.496366	8.95887	3.7332e-07
Arntl2	0.499824	8.2918	2.42645e-09
D230005D02Rik	0.500268	10.3315	0.0136526
LOC386196	0.50489	9.23794	0.000579913
Myef2	0.506074	10.0727	1.45506e-05
3632451O06Rik	0.506221	8.67273	2.97927e-07
Adam32	0.50969	8.98915	0.000220278
Aldh3a2	0.511975	9.53446	5.58628e-08
Tra2a	0.513338	12.945	3.57894e-05
4930583H14Rik	0.517563	11.0785	0.00259676
Pmm1	0.518424	11.1549	0.000137747
Pigl	0.519174	10.5324	0.000228139
C430020H24Rik	0.51977	11.5139	3.93835e-05
Zfp75	0.520629	9.37799	2.97207e-10
C330003B14Rik	0.52202	8.57251	7.9715e-05
LOC236371	0.529545	9.81091	1.33492e-07
Slc12a8	0.534015	9.37407	2.32399e-06
Clca4	0.534802	9.4961	2.99099e-06
Zp3	0.546634	8.99004	0.00999337
Slc1a3	0.554807	9.76034	1.06302e-06
LOC626391	0.557479	8.61412	0.000128522
Ash2l	0.558096	11.3932	3.66941e-06
D030013I16Rik	0.559792	8.78422	1.15805e-06
Fkbp6	0.56334	8.83891	0.000579913
LOC386021	0.563625	11.3157	0.000104334
Fv1	0.565888	10.0952	8.31602e-07
Tnnt1	0.572365	10.107	9.34086e-05
Rnf125	0.575653	8.69884	7.9249e-12
5730405I09Rik	0.577	9.66693	1.17024e-11
AU019823	0.577313	9.63123	7.44671e-08
Pon2	0.57816	9.40905	2.76552e-07
B230354O11Rik	0.578546	10.5778	1.21117e-05
LOC386360	0.582334	13.3919	1.84838e-07
Kng2	0.584313	8.44179	1.23024e-11
2010309L07Rik	0.586851	10.4838	0.00247492
AW060766	0.592136	9.98729	8.6118e-07
2210411K11Rik	0.592809	10.9107	0.0261906
D5Wsu178e	0.596813	9.65307	7.51216e-07
2610524H06Rik	0.597891	9.56484	4.54834e-07
Stag3	0.598827	10.6064	3.43635e-09
Rog	0.603915	9.62807	0.0178442
Bglap2	0.608075	8.51319	1.84838e-07
Prf1	0.608216	9.95094	0.0244974
Hps3	0.608976	8.73941	1.64534e-10
2610036A22Rik	0.611188	9.77503	4.16787e-10
Ramp3	0.615727	8.59118	1.28357e-11
Gadd45g	0.619477	10.4183	0.00138922
LOC234413	0.622417	8.87498	3.6579e-08
Tex11	0.63046	9.00932	0.00293279
LOC386078	0.632615	12.1555	6.65293e-05
LOC385825	0.637016	12.274	1.88803e-06
LOC386405	0.639916	13.83	0.000128522
LOC386112	0.64259	10.6477	3.93106e-06
6720460L05Rik	0.645049	12.3754	1.76078e-07
LOC386330	0.646788	10.4805	8.31043e-08
Gstp1	0.651325	11.4792	3.6579e-08
2810474O19Rik	0.654309	9.78582	8.9033e-07
Zbtb2	0.655699	9.74733	0.0116298
Tulp4	0.663654	9.47954	6.53535e-08
Serinc3	0.666641	10.2833	4.77078e-11
Slc27a2	0.669394	9.85202	0.000700363
2010001M09Rik	0.6719	8.32269	1.45653e-06
C130023K05Rik	0.677495	12.3822	1.49344e-07
Loh11cr2a	0.682249	9.34999	2.39777e-09
Atf7ip	0.685721	10.4318	4.77078e-11
LOC385163	0.68588	10.7031	1.46554e-05
LOC382707	0.688889	11.2372	1.99193e-10
6330415F13Rik	0.69064	8.69867	5.24671e-09
LOC386218	0.698605	12.4103	3.28391e-06
Dhrs7	0.700106	10.6039	1.67789e-07
LOC382691	0.7156	11.1942	2.18577e-11
3110050N22Rik	0.722888	10.2189	0.000921741
Hmgb2l1	0.728995	11.4394	0.000251867
LOC386192	0.730017	12.5105	2.45269e-08
5133400G04Rik	0.733232	9.64046	0.000507747
LOC385959	0.739117	10.1273	2.66774e-07
Akr1c19	0.741219	8.61183	2.60566e-12
Card4	0.74296	9.88805	0.00432675
LOC386144	0.743532	12.3806	1.18383e-08
Rad52b	0.759236	12.2741	3.70464e-08
Leng9	0.760476	8.59419	1.52098e-12
C130073O12Rik	0.762847	8.92685	1.18802e-08
2300009N04Rik	0.764424	8.31169	2.41481e-10
2900011O08Rik	0.766694	8.95961	2.05881e-11
D330028D13Rik	0.767777	9.19307	4.3935e-11
C920004C08Rik	0.777317	9.03821	2.59835e-11
Otx2	0.784418	10.158	0.000631801
D130017D19Rik	0.787409	11.3284	2.68673e-05
C130073F10Rik	0.793083	8.27951	1.93131e-12
LOC385923	0.796068	10.1678	1.94449e-09
Eif2s2	0.796804	12.3701	0.000172831
scl0002084.1_607	0.798112	9.10927	4.70649e-10
Serpina3m	0.799851	8.80055	3.80998e-06
1700030C10Rik	0.800181	9.6606	9.75747e-05
LOC385855	0.800685	10.352	9.92187e-07
Cd59b	0.806782	9.02553	4.67946e-11
Etv1	0.81054	9.05866	1.19004e-08
D14Ertd449e	0.817963	9.6477	1.27968e-05
Taf7l	0.818533	9.24271	2.66774e-07
BB114266	0.827244	9.7387	1.4102e-08
Dcl1	0.844829	8.51352	7.40221e-15
2410011O22Rik	0.84755	9.92695	1.02983e-05
Plod2	0.848834	9.41761	1.14571e-12
E430003D02Rik	0.849901	13.2972	6.66878e-07
Ostm1	0.85214	11.0133	5.00414e-09
Iap	0.856993	12.1863	3.0682e-10
6330407D12Rik	0.861663	9.32165	4.87062e-10
2400010D15Rik	0.879899	10.2163	3.282e-11
EG237009	0.900835	8.4667	2.26858e-10
F730003H07Rik	0.900837	11.0242	6.21563e-10
BC006909	0.903477	10.5397	3.13097e-09
Usp26	0.911508	9.62594	0.0039226
Ube2e2	0.917114	10.1576	2.32497e-07
LOC381678	0.969252	9.5744	3.282e-11
Zfp42	0.981121	10.3878	8.72382e-10
Glrx1	0.989905	9.34372	1.35992e-05
6430590A07Rik	1.03677	9.63111	4.77078e-11
Zcwpw1	1.03795	9.30759	1.41564e-10
LOC434729	1.05369	9.92184	9.97779e-11
Tuba3	1.08628	10.3355	0.000622472
2410088K16Rik	1.12379	8.65161	3.69132e-11
LOC333190	1.12399	8.96052	2.80826e-14
Glrx	1.12857	9.66367	0.000125004
1700007E06Rik	1.14536	9.19391	5.61193e-11
LOC385780	1.14654	8.94944	5.30194e-08
LOC384348	1.16257	9.73719	2.60566e-12
B930045J24Rik	1.1677	9.12429	1.17024e-11
LOC239727	1.18173	9.62225	7.04813e-11
Stk36	1.24591	9.26547	2.05881e-11
LOC332788	1.29278	9.46726	1.28996e-15
Cte1	1.29756	11.3174	9.97779e-11
Gng13	1.31487	10.1007	2.35293e-09
MGC58426	1.33134	8.6547	2.35039e-11
LOC268730	1.34061	9.65693	8.90754e-12
Tcrg-V4	1.35566	8.81222	5.80595e-18
2410004F06Rik	1.40387	11.9459	0.000114902
Chst1	1.43074	9.08169	6.78729e-16
Bglap-rs1	1.44295	9.12331	5.65526e-11
Cdc42ep5	1.5376	9.59333	7.80605e-17
LOC380889	1.57739	8.85937	4.76924e-10
Ldoc1	1.58187	9.69489	1.28996e-15
2010005H15Rik	1.60933	9.30373	1.76919e-12
LOC382040	1.62222	9.35806	4.26267e-15
Ybx3	1.62647	10.8282	5.07979e-15
Gstp2	1.67957	12.6627	3.282e-11
P2ry5	1.69186	11.08	8.71117e-12
EG243881	1.69271	9.09385	2.75014e-17
Tlr2	1.80855	9.00671	5.80595e-18
OTTMUSG00000010673	1.81644	11.8667	8.4133e-13
LOC218840	1.82255	9.14877	8.76285e-09
Mep1b	1.84653	9.0418	5.80595e-18
LOC383125	1.94091	10.4486	7.40221e-15
1700029P11Rik	2.2084	11.076	8.94344e-18
Cd59a	2.23453	10.8718	9.87698e-16
EG433016	2.31811	9.61328	9.87698e-16
LOC380980	2.33898	9.67327	1.24438e-14
LOC243881	2.419	9.4149	9.41167e-19

## Sheet: Setdb1 microarray DAY 3 p<0.05
GENE SYMBOL	logFC	AveExpr	adj.P.Val
Krt42	-2.61181	10.4768	2.67061e-13
Gpx2	-2.34226	10.4822	0.000321493
2410039E07Rik	-2.24648	9.81528	3.26985e-13
Trh	-2.19613	11.8596	1.97657e-09
Myo1f	-2.12782	9.57607	5.7556e-09
Krt1-17	-2.04463	9.32214	1.1884e-08
Laptm5	-1.85187	11.705	3.40621e-10
2210415K03Rik	-1.79074	9.81596	1.27691e-09
Lrrc34	-1.70959	11.5816	7.19921e-14
Gfpt2	-1.67005	10.406	1.01915e-16
Lama1	-1.64637	9.59284	4.70078e-11
Myl4	-1.61468	9.29973	2.83712e-13
2900078C09Rik	-1.57867	8.84304	1.34452e-11
2410004A20Rik	-1.50575	9.78782	1.48364e-07
Tcfcp2l1	-1.47828	11.9889	5.30583e-05
Phlda2	-1.45961	11.6265	3.00996e-13
Inhbb	-1.40144	8.91847	0.00010121
Fgf17	-1.40007	8.75232	2.80373e-19
Gli2	-1.32731	9.45141	0.00269728
Pace4	-1.31891	9.76296	1.83209e-12
AW046396	-1.28421	9.87489	1.40422e-08
Serpinb6c	-1.27747	9.62337	1.22178e-06
Gjb3	-1.27638	11.3132	4.97182e-12
Itpk1	-1.26011	11.1046	1.97901e-10
Ccnd2	-1.25419	8.535	0.00116608
Sfrp1	-1.25406	9.29179	1.99172e-08
Spink3	-1.24659	8.6183	1.47632e-15
Plac8	-1.22317	9.23068	0.0132661
Kdelr3	-1.17375	10.2993	3.12038e-07
Cobl	-1.12277	9.00547	1.53971e-16
Tcf15	-1.11663	9.79713	1.95133e-06
Nxn	-1.11375	11.2667	0.000518721
Msc	-1.10181	9.29694	4.83758e-05
Mras	-1.096	8.42763	2.28534e-15
Gbx2	-1.09401	11.4799	0.00144168
AI427138	-1.08835	11.78	0.000189518
Ifitm3	-1.06448	13.4395	2.54733e-10
Pgc	-1.058	8.92745	4.15105e-15
Mapt	-1.05725	8.74125	4.54971e-06
9130417I07Rik	-1.04164	8.54293	5.84568e-06
Nanog	-1.03834	11.7211	1.82e-08
Ets2	-1.03833	9.8002	5.59322e-10
Gna14	-1.03435	9.08542	0.00808873
Tcl1	-1.01872	9.46459	1.04063e-09
Zfhx2	-1.0015	9.9531	2.45448e-05
Vegfc	-0.99623	9.03631	3.38281e-10
Tbx3	-0.995642	9.34087	0.000454116
Lrig3	-0.976708	10.2916	6.60656e-08
Pcyt1b	-0.975566	9.83084	1.23105e-08
Tsga2	-0.971855	9.60509	1.65231e-12
2310046K01Rik	-0.950094	8.72643	6.10138e-11
LOC239102	-0.947793	9.67879	9.85331e-06
Scd1	-0.944515	9.77413	5.48486e-08
Ass1	-0.93904	10.8996	4.13167e-07
D16Ertd472e	-0.930545	9.83417	7.02185e-10
Eppk1	-0.923476	9.17169	1.34766e-05
Klf4	-0.900728	9.51192	1.01908e-09
Cdc42ep4	-0.886335	10.1828	0.000126851
Setdb1	-0.884096	9.14036	2.09589e-14
Ccnd3	-0.872299	11.0482	2.14602e-08
D130083G05Rik	-0.864375	10.812	9.49796e-06
Tubb2b	-0.862776	11.9567	5.15681e-11
Capn5	-0.860309	10.7466	2.918e-09
Fstl1	-0.848381	9.34305	0.000470092
Olig1	-0.846911	11.6448	3.17443e-08
Erdr1	-0.845409	12.6233	0.0247363
Esrrb	-0.840737	12.8735	3.13662e-09
Igfbp2	-0.83379	11.978	0.00535388
5430425C04Rik	-0.82317	9.34493	3.28182e-05
1200009O22Rik	-0.817027	8.09669	6.05395e-11
Oat	-0.808427	10.7182	0.000264885
Pycr2	-0.803798	12.4754	1.39526e-05
Ebaf	-0.802261	10.5658	5.14508e-06
Hes1	-0.801124	8.92873	5.42697e-05
Fxyd6	-0.799988	11.2689	1.01446e-07
Npn3	-0.798888	9.38681	1.09565e-14
Gsto1	-0.795343	11.1283	1.30777e-06
Hal	-0.794159	8.62836	0.00650571
E130012A19Rik	-0.769188	12.0564	3.78438e-09
Crtac1	-0.765478	8.83879	1.6104e-05
Nupr1	-0.764169	11.5401	6.28503e-06
A130092J06Rik	-0.760178	9.00931	0.000599557
Trf	-0.756767	8.79249	0.00073604
Alpk3	-0.756469	9.04849	5.66395e-06
2410137M14Rik	-0.754564	8.86287	1.58805e-08
LOC383491	-0.748346	8.47184	2.30317e-06
Aoah	-0.747828	8.87308	3.24084e-05
Leftb	-0.73599	12.4619	9.61562e-06
Ifitm1	-0.7359	11.9543	0.000291091
Cplx1	-0.735609	8.85035	2.42416e-06
Ccnd1	-0.731766	11.4917	7.65431e-10
LOC381411	-0.729653	8.22316	0.0060027
Htra1	-0.726961	8.87529	1.14067e-06
2310009N05Rik	-0.724489	8.88708	0.0106851
Cited2	-0.722711	9.75577	1.07424e-07
1700037H04Rik	-0.720727	12.2185	1.01455e-07
D11Ertd759e	-0.719727	9.53011	9.40992e-08
Gm1967	-0.717368	8.20379	0.00190064
Hap1	-0.71352	9.02335	4.37736e-15
2210409E12Rik	-0.70525	10.3407	0.0063458
F830002E14Rik	-0.70346	8.63891	0.0324764
Ppap2a	-0.696919	9.27321	9.19009e-07
Fblim1	-0.695737	12.2316	0.010622
LOC208080	-0.695082	10.5114	2.12553e-08
Sgk	-0.693093	13.5445	0.0245135
2610033C09Rik	-0.691211	12.4787	4.87442e-09
Ivns1abp	-0.688372	10.4982	0.0153396
LOC381140	-0.683851	10.104	0.00451562
Pga5	-0.672242	8.72385	0.0331765
2310007G05Rik	-0.671324	10.1515	1.7119e-08
BC032203	-0.669595	11.7265	2.54796e-07
Ubd	-0.665909	9.00054	3.35339e-05
Dpysl3	-0.659994	9.17975	2.86372e-10
St5	-0.659096	10.3319	0.00290436
Epb4.9	-0.65754	8.61136	1.41103e-12
6030495B01Rik	-0.650217	8.66366	0.0134033
Bach2	-0.649082	9.04871	0.000495086
Etv4	-0.64901	10.3476	0.000171235
Tgm1	-0.647263	8.72099	1.42732e-07
Dyrk3	-0.641565	11.273	0.0423515
Igf2bp2	-0.635176	12.0377	0.00279763
Gm1631	-0.634581	8.56123	0.000183961
LOC243823	-0.630566	8.6885	0.00366009
D130003B22Rik	-0.628715	8.74775	4.04004e-07
Sema4a	-0.622827	9.25009	0.000272971
9330107J05Rik	-0.621364	10.3309	0.00203431
Pde1b	-0.621194	9.73955	1.51969e-06
8430410A17Rik	-0.617147	10.2705	0.00133019
2009-09-01	-0.616613	9.26832	1.39763e-06
9130422H11Rik	-0.613707	9.09319	2.54796e-07
Pcolce	-0.605698	9.9007	0.000633831
Myst4	-0.605345	10.025	6.77308e-06
Ppargc1b	-0.605131	9.2258	2.53743e-07
LOC545007	-0.604872	9.84977	4.60987e-05
4933405K07Rik	-0.600517	9.40689	4.2616e-06
Bhlhb2	-0.592835	9.88671	0.00520082
Cpe	-0.592243	8.57052	8.83924e-09
D430028G21Rik	-0.58946	9.08526	1.82962e-06
Gababrbp	-0.58918	9.57204	1.29051e-06
Dcbld1	-0.589116	9.54157	2.69841e-06
Cd9	-0.584049	11.8244	6.21771e-07
Pfc	-0.582122	9.46545	5.65154e-07
Frat2	-0.579528	9.23272	4.62224e-10
Trim8	-0.577548	11.7684	2.85544e-05
Cish	-0.574324	9.01928	5.77819e-07
E130014J05Rik	-0.572848	9.35013	1.78072e-09
Tagln2	-0.570995	11.5545	0.0163636
Zfp57	-0.57014	10.1064	0.000774354
Map4k1	-0.569156	10.0634	0.000928464
Mfge8	-0.568822	12.6714	1.33165e-06
Arc	-0.567452	8.51962	5.27706e-09
Parp1	-0.567249	12.6603	0.00193695
Kit	-0.566258	9.26058	0.00027634
Fah	-0.563453	10.2136	0.0108385
Dtr	-0.563422	8.78805	2.13648e-06
2001-09-01	-0.561459	9.65745	0.00425611
Pgam5	-0.55915	10.6748	2.86676e-05
Pdgfa	-0.559057	11.7853	1.18683e-06
LOC386529	-0.557743	8.49272	2.72735e-08
Ifitm2	-0.556882	13.4427	1.94075e-06
Tek	-0.555706	8.46686	1.29966e-09
Eif4el3	-0.554047	11.577	0.0484762
Tnfsf13	-0.553754	9.76961	3.78307e-07
1190017O12Rik	-0.551295	9.78156	3.44575e-05
BC038156	-0.550655	9.50772	1.58779e-08
Stmn2	-0.550158	11.6398	0.000285742
Gcnt2	-0.548913	9.78253	4.16487e-11
Dnajc6	-0.548794	9.56144	0.0349282
Gpt2	-0.548721	9.96945	7.86893e-06
Cotl1	-0.548123	9.80557	0.00443794
Golph2	-0.547396	10.9533	0.000623216
Sorl1	-0.547251	8.58607	2.85435e-11
Cdo1	-0.546429	8.95851	2.34007e-06
1700019N12Rik	-0.54269	9.2591	1.24611e-07
Tgm2	-0.541057	8.60098	2.86676e-05
Notch4	-0.538531	8.7539	4.14972e-07
B4galnt4	-0.53814	8.50889	3.00543e-08
Porcn	-0.536654	9.64836	5.50035e-09
9630048M01Rik	-0.535422	8.66945	1.81526e-05
D9Ertd280e	-0.53525	9.29039	1.4336e-07
Psmb10	-0.533825	10.3733	6.15691e-06
Socs3	-0.532712	11.6974	0.00111725
Efs	-0.531114	9.93534	8.28864e-08
0610012D17Rik	-0.530822	11.1847	2.58004e-08
Tiam1	-0.53023	9.85786	0.000101602
Slc6a8	-0.529533	10.3408	7.11967e-06
Tmem108	-0.529393	8.17293	0.00396491
C230093N12Rik	-0.525027	10.3575	0.0367869
Lmyc1	-0.523714	9.43652	4.85641e-06
D6Wsu176e	-0.523678	10.6298	2.40973e-07
Myo5c	-0.522573	8.59558	0.00177633
D130058I21Rik	-0.52131	9.93406	0.000987515
A530088H08Rik	-0.517501	8.35337	0.000142765
Rab7l1	-0.517428	8.57633	0.00762355
Tgfb1i4	-0.517163	10.3572	5.74142e-05
Rab8b	-0.517105	9.92521	1.34167e-06
Lamc1	-0.515946	10.558	0.0108352
Ppic	-0.514191	11.2868	0.000380514
Rab27a	-0.513777	10.4256	4.08103e-06
Sparc	-0.512757	10.1362	0.0222571
Aldh3a1	-0.512135	8.15188	2.43345e-09
Brp17	-0.511703	8.70505	8.95668e-07
Avpi1	-0.511657	10.1949	0.000173928
1700014P03Rik	-0.511517	8.40248	1.39763e-06
Mtap7	-0.511466	9.99773	8.86133e-06
Sult4a1	-0.510403	11.6034	2.64213e-06
4732455O04Rik	-0.509501	9.02318	1.48816e-07
Senp3	-0.508689	12.8368	0.000222225
Pdgfc	-0.508279	8.20697	2.19022e-08
Elovl5	-0.507146	12.4252	0.000533044
Fmnl2	-0.506449	9.41069	3.11027e-08
Ak2	-0.506397	10.9227	1.14379e-06
Bcl3	-0.503785	8.94635	5.29543e-06
Pdyn	-0.498791	8.32621	1.72046e-09
Pald	-0.498158	11.1372	0.000269716
Galnt11	-0.497669	9.43449	2.0945e-09
1700007J06Rik	-0.496073	8.55365	4.38635e-06
Sall3	-0.495004	8.28737	2.16351e-08
1810027I20Rik	-0.494474	8.60265	1.69155e-06
Nfatc4	-0.493531	10.1407	1.5756e-07
Cmtm7	-0.493248	9.31014	0.0172635
Cds1	-0.492944	9.73774	0.0018917
3830612M24	-0.492737	8.45584	2.63198e-11
Atic	-0.492146	9.92262	0.010123
9630046K23Rik	-0.492025	11.6979	9.69334e-05
Ankrd35	-0.491672	8.88235	5.77819e-07
Inpp5d	-0.49103	8.82921	0.0253542
2610019I03Rik	-0.49029	9.79929	5.97859e-05
Tnfrsf21	-0.487023	8.72136	8.29694e-10
Prss19	-0.486693	9.02438	2.0874e-05
1190002H23Rik	-0.486607	9.98159	0.0116727
Cd68	-0.484313	9.4275	5.12697e-06
Poldip2	-0.484178	11.6983	6.78107e-07
scl0003519.1_175	-0.484098	8.4099	1.42732e-07
Schip1	-0.482813	9.74521	2.55016e-07
Slc29a3	-0.482721	8.73536	2.54796e-07
Ebp	-0.482083	9.13091	2.85893e-06
6720458D17Rik	-0.481778	8.19776	1.35851e-06
Chrna9	-0.48176	8.85682	3.2866e-06
Sh3tc1	-0.480685	8.50875	5.91061e-09
Fbxo6b	-0.480308	12.2598	4.2581e-06
Tnip1	-0.479984	9.07336	2.96766e-10
Homer2	-0.479273	9.53806	2.94589e-07
C330005L02Rik	-0.479264	10.1182	3.22099e-06
Rangnrf	-0.479194	11.2568	3.80037e-06
2610207P08Rik	-0.475956	11.2734	8.23967e-09
Anp32a	-0.474032	10.2778	2.81155e-07
Idb2	-0.472589	9.61814	0.000380019
Ccl25	-0.472026	8.53048	8.21015e-08
Rab6b	-0.468945	8.78887	7.9117e-07
Mrps6	-0.468638	10.1278	9.31847e-06
2200001I15Rik	-0.468464	9.11579	0.0140415
Arrdc4	-0.467869	12.0785	0.000393822
Ckb	-0.465863	14.06	6.70417e-05
Camta1	-0.465445	9.99368	2.26306e-05
Etsrp71	-0.463935	8.85319	9.84599e-08
Acas2l	-0.463678	9.78588	0.000201275
Sgk2	-0.463599	8.22524	8.69564e-09
9430080K19Rik	-0.461738	12.1367	0.031575
BC028528	-0.461425	8.53352	6.64472e-07
Fbxo2	-0.46132	9.91898	1.30429e-05
9930116P15Rik	-0.461314	11.654	4.69837e-06
1600021P15Rik	-0.46055	10.3338	8.98453e-06
Dync2li1	-0.460331	9.34629	1.03583e-09
Csnk1e	-0.459952	11.3049	3.18681e-07
Slc6a6	-0.458329	11.3789	3.28139e-05
Ndg2	-0.457968	14.7111	1.47074e-06
Apobec3	-0.457945	9.27019	1.30614e-08
C130033B18Rik	-0.456432	10.0942	0.0441761
1110020C13Rik	-0.456093	11.3656	1.77467e-06
9830143E02Rik	-0.455785	8.59633	1.34513e-06
Fkbp11	-0.455725	11.281	6.32117e-06
Dhrs6	-0.454836	9.30398	4.27204e-06
LOC385492	-0.454741	8.64749	1.12152e-09
Gadd45a	-0.453891	11.791	0.000533044
Camk2b	-0.45134	8.93255	0.00533694
Shmt1	-0.450596	10.3702	1.06862e-08
Spint1	-0.449881	11.5982	0.00093193
Tex264	-0.449843	8.94031	1.04462e-07
Stard8	-0.449534	8.47477	0.000409282
Eras	-0.449515	11.0262	1.97102e-05
Aard	-0.448481	10.4285	5.48256e-05
AA467197	-0.448138	9.54421	9.10816e-06
Tubg1	-0.447866	9.80794	1.41514e-06
Lmna	-0.446449	9.83305	5.84856e-07
Ccdc53	-0.444698	10.1088	1.34551e-07
2310005L22Rik	-0.444188	11.0493	0.00171217
Mybl2	-0.444101	11.4296	1.26741e-06
Itpka	-0.44366	8.69951	0.00219574
2310047C17Rik	-0.44214	8.54188	5.04673e-07
5033414D02Rik	-0.441764	9.77145	1.75432e-06
Serpinf1	-0.441319	9.18848	0.0437121
Tulp2	-0.441275	9.57937	0.000129956
Epb4.1l4a	-0.439976	9.73229	1.96108e-05
Jam2	-0.439756	8.36493	1.41487e-11
BC003277	-0.438923	10.4187	0.00190625
Slc11a1	-0.438596	9.2043	2.73264e-05
Ndrl	-0.43347	8.96743	7.76295e-06
Frmd6	-0.433002	9.39743	0.000128815
1190002C06Rik	-0.432088	11.0039	0.0122308
C330006A16Rik	-0.431551	9.89377	1.38115e-05
Tead2	-0.431051	11.6845	0.00341585
2210401J11Rik	-0.430843	8.0567	1.44773e-09
Nfkb1	-0.43044	9.26828	2.16805e-08
Ak7	-0.430091	8.37109	0.0014955
BC037708	-0.430056	10.5736	5.04502e-05
Actn3	-0.42954	8.7505	6.92754e-10
Galnt2	-0.429359	10.1117	3.23847e-05
Skap2	-0.428903	11.5871	9.41457e-05
Tdh	-0.428167	9.67819	0.00635945
AI850995	-0.427404	9.23687	0.0351192
Fkbp5	-0.427249	10.4777	5.4043e-08
Mocs2	-0.426165	9.23567	4.47623e-07
Slc39a11	-0.426075	8.99339	1.78871e-06
Aim1l	-0.425419	9.52137	4.7411e-07
Gpr125	-0.42415	11.0138	0.000157601
Ssbp4	-0.423555	10.2372	0.000130021
Cst3	-0.422035	11.4311	0.000385761
4930519N13Rik	-0.421277	9.34832	0.0303407
H6pd	-0.419594	9.25192	9.45678e-07
Gsta3	-0.419554	8.32992	0.0412586
Aatf	-0.418925	9.92993	5.21037e-07
Cltb	-0.418198	8.48984	9.19009e-07
5730438N18Rik	-0.417452	10.3911	7.58683e-07
Rpp25	-0.415365	12.1127	0.00145429
Slc29a1	-0.415075	10.4558	1.41561e-06
Arl6	-0.41421	10.0515	8.0521e-05
LOC383897	-0.413683	11.0311	1.55932e-06
Smox	-0.41258	8.51218	0.000352845
1110018K11Rik	-0.410325	8.1881	4.9949e-07
Abcb1b	-0.409934	8.89881	1.76296e-05
E2f2	-0.408874	8.47621	1.99133e-05
2810441K11Rik	-0.408481	9.5649	0.00199338
scl000418.1_42	-0.408314	8.24242	0.0100663
1110059F07Rik	-0.408275	9.53563	0.00304093
Ccs	-0.407634	11.3213	1.76296e-05
Sirt5	-0.407206	8.80882	3.79858e-08
Ift52	-0.407139	11.011	0.00137973
2610528E23Rik	-0.406454	9.21949	1.08567e-05
Mia1	-0.406327	8.86353	0.00102172
2410022L05Rik	-0.405783	10.4152	4.17879e-05
Wsb1	-0.405142	11.6496	0.000778572
2010001O09Rik	-0.403751	10.5178	3.78441e-08
Sec14l1	-0.403707	8.59093	1.92282e-08
6330534C20Rik	-0.403644	9.37612	6.19026e-05
Nlrx1	-0.403605	8.3053	0.00538263
Arih2	-0.403016	11.667	1.31283e-05
Plekhh1	-0.402759	10.2872	0.00157212
Sirt3	-0.402601	9.8756	1.10856e-05
Mov10	-0.402517	8.92141	6.83633e-06
Osgep	-0.402357	11.6192	0.0010393
LOC207939	-0.402151	8.44927	1.93054e-07
LOC235857	-0.400963	10.2896	0.000928464
Centa1	-0.400854	8.32762	0.000232415
Cyp4f13	-0.399929	9.42332	1.08312e-06
Insm1	-0.398671	8.71667	0.0084005
A630086H07Rik	-0.398594	9.58439	3.5359e-05
Spats1	-0.396781	9.13229	0.00303432
Nfil3	-0.396001	9.43448	6.57791e-07
Fgf4	-0.39575	9.77379	0.000347663
Atp2a3	-0.395384	8.25857	1.79387e-05
Ak3	-0.394804	8.79743	1.03911e-05
Igsf3	-0.393909	10.1186	1.47934e-05
5730593N15Rik	-0.393444	8.15061	9.84328e-09
Snag1	-0.3934	11.2061	6.19509e-05
Cnih4	-0.393371	12.5036	0.0266623
Igfals	-0.393235	9.3245	7.0204e-08
LOC228715	-0.392174	9.88512	0.000222326
1700013A01Rik	-0.390515	9.5833	1.47034e-08
Evc2	-0.389704	9.00666	0.000366134
LOC215415	-0.389623	8.45585	0.00143359
Bub1b	-0.388462	11.7132	2.15342e-06
Nfatc2ip	-0.388459	9.14765	7.19154e-05
Hk2	-0.38843	13.9548	5.37835e-05
Gjb4	-0.388085	8.06617	1.0276e-07
Cdc5l	-0.385863	11.8453	9.54773e-07
Egln3	-0.385639	8.81009	1.38246e-06
Saa3	-0.384888	8.43511	4.11076e-06
Grasp	-0.384514	9.07835	6.65089e-07
BC008171	-0.383786	9.2315	2.21894e-05
Fjx1	-0.383577	8.35201	1.65129e-05
Ppap2b	-0.382895	9.42912	0.000498092
Mapkapk3	-0.381774	9.79563	0.000393501
Mrpl10	-0.381761	11.7622	2.81155e-07
D14Ertd226e	-0.381626	10.4118	0.000780016
Qdpr	-0.380795	10.42	6.53127e-05
Emp1	-0.380344	9.09855	0.0092965
1190003J15Rik	-0.379705	10.7351	0.00212265
Msrb2	-0.377843	8.94567	0.00526419
3110043J09Rik	-0.377839	8.98886	0.0079904
Pdpk1	-0.377104	9.77513	4.13167e-07
D15Ertd405e	-0.376718	9.57129	5.36337e-06
LOC634428	-0.375394	8.54013	0.00155673
Csrp2	-0.374929	13.3996	0.00580158
Add3	-0.3749	9.9647	4.18253e-06
Nr1i3	-0.372989	9.06416	0.00153946
1110001N06Rik	-0.37294	10.632	0.000466648
BC006933	-0.372352	10.323	5.7006e-08
6330403E01Rik	-0.371637	9.76272	0.000249818
Neurl	-0.371587	9.30905	0.00131328
Krt10	-0.371101	9.41177	4.32847e-07
Gstt3	-0.371096	8.76361	1.5714e-06
Ildr1	-0.370992	8.47756	1.35627e-07
AA175286	-0.370298	8.11735	0.00140887
B930096L08Rik	-0.36992	9.86687	4.03044e-06
Tbc1d13	-0.369858	11.9263	0.0446909
Reep1	-0.36965	8.9649	0.00306259
A430005L14Rik	-0.369499	10.131	1.97557e-05
AI118078	-0.368553	8.10287	1.08324e-05
0610012G03Rik	-0.367596	10.8148	1.42595e-05
Capns1	-0.367355	12.6181	0.0234312
1110017D15Rik	-0.366695	8.59841	0.0484762
C330008K14Rik	-0.36668	9.51862	6.77951e-05
Prep	-0.365955	9.44884	9.2468e-09
Gaa	-0.365378	9.19637	9.05002e-05
Extl3	-0.365336	9.5241	1.68825e-07
1110003E01Rik	-0.364699	10.694	0.000846817
Arl4	-0.364598	8.5907	2.11513e-07
Dnajc15	-0.363517	11.5235	0.00120664
Ruvbl2	-0.363448	12.3044	4.37855e-06
Adam23	-0.363054	8.23961	5.78478e-05
Ndp52	-0.3623	8.48661	0.000110252
Klf3	-0.362079	8.92375	1.56347e-05
Whdc1	-0.362021	9.01051	9.74688e-07
Pex11b	-0.361371	10.5071	1.56028e-07
2610036D13Rik	-0.360637	10.0363	0.000589638
Camk2n1	-0.359936	9.14187	0.000768901
Prkcd	-0.359748	9.77298	5.0768e-05
Gm691	-0.359379	8.68797	0.0142123
St3gal3	-0.359085	9.54436	6.22377e-05
C330018L13Rik	-0.35894	9.7854	2.8447e-06
Brwd1	-0.358492	9.34626	5.00843e-05
Mtch2	-0.357722	11.0351	1.5826e-06
Tpst2	-0.357703	10.6985	5.1581e-07
4931417G12Rik	-0.357703	8.10149	2.64031e-08
Stat4	-0.357173	8.35833	5.13106e-06
Slc25a39	-0.35699	10.3212	2.66762e-05
Sipa1l1	-0.356847	10.8947	0.000755184
Tcea2	-0.356778	9.2011	0.0167711
BC025546	-0.356139	9.47249	0.0127804
Pitpnc1	-0.355914	8.98627	0.0011855
Itpr1	-0.355615	10.4245	3.66214e-06
Mrpl36	-0.3553	12.0461	0.000179221
Tgif	-0.354969	10.0115	5.19847e-06
A130047F11Rik	-0.354633	8.42126	1.96414e-05
AI663987	-0.353237	10.5317	0.00179511
Nid1	-0.353117	8.38606	6.77951e-05
Rrm2	-0.352975	9.93348	2.14444e-05
Aes	-0.352862	9.15727	0.0105525
Stat3	-0.352498	9.71616	0.0093509
E030026I10Rik	-0.351353	8.57205	5.12123e-06
Niban	-0.351151	9.10952	1.14772e-05
4930538D17Rik	-0.350854	10.5306	0.00160746
Ankrd10	-0.350793	9.13689	9.04098e-05
B930041F14Rik	-0.349591	10.3473	0.0446245
Gmppa	-0.34847	9.33941	0.0267401
Mrps16	-0.348395	11.053	1.53725e-05
Dcun1d4	-0.347534	9.07764	0.000854772
Pdk3	-0.347216	9.87733	0.000980881
Pros1	-0.346755	8.61234	0.0304442
1110029L17Rik	-0.346094	10.5303	3.66214e-06
2210015K02Rik	-0.345758	8.78911	3.07644e-05
2310041H06Rik	-0.345615	9.32894	0.00557073
Ldb1	-0.3455	12.7612	5.41727e-06
Gm561	-0.345073	9.81745	0.0012521
BC038881	-0.345057	8.48735	8.33253e-07
2610319H10Rik	-0.34468	9.7653	0.00451562
Epb4.1l4b	-0.342139	9.02979	4.9949e-07
Mmp2	-0.34189	8.89182	0.00320095
Arl3	-0.340796	10.1611	6.53985e-07
4930422J18Rik	-0.340617	9.17696	0.0122724
Gm2a	-0.339833	10.4679	0.00309624
2610018I03Rik	-0.339038	8.74948	2.59493e-06
Hps1	-0.339007	8.88546	3.67822e-05
Itgb7	-0.338777	8.75176	0.000628705
D10Bwg1379e	-0.338751	8.31138	0.000928464
Slc6a15	-0.338394	8.41147	2.72929e-07
Sall1	-0.337898	9.01485	0.000306088
Crym	-0.337352	8.3878	5.17633e-05
Mylpf	-0.337313	11.4588	0.0126116
Gclm	-0.33715	11.2771	0.00678774
2210011C24Rik	-0.336657	8.66163	0.000806549
Gprc5b	-0.336459	8.362	0.0025579
2510027N19Rik	-0.336338	11.7179	0.000382309
Fcgrt	-0.336294	8.69638	3.27553e-07
Zfp296	-0.336204	10.0039	6.5642e-05
AU040950	-0.335275	8.72175	0.000478874
Mir16	-0.335203	10.6215	6.63503e-06
Kctd1	-0.334945	8.29512	2.36503e-06
Tk1	-0.334742	9.37027	1.45352e-05
1110012J17Rik	-0.334695	10.293	0.00489139
Cryz	-0.334029	8.73721	1.44368e-07
Pdha1	-0.333921	12.7569	0.000109554
Gfod1	-0.333849	8.67861	0.0123656
Jundm2	-0.333279	8.42376	1.82304e-06
Cyb561	-0.332889	10.2767	0.00213618
LOC380706	-0.332577	8.15528	0.0108214
AI256711	-0.332106	8.82075	0.0035463
Slc38a5	-0.331671	8.03489	0.00307657
LOC381105	-0.331156	8.42757	5.8603e-06
Pak4	-0.331095	10.7152	3.2426e-05
Chchd4	-0.33107	11.0219	6.99813e-06
Thtpa	-0.330783	9.40775	4.26266e-06
Dgkh	-0.330131	8.3904	4.58907e-08
Bzw2	-0.330055	12.4504	3.47101e-05
2310035K24Rik	-0.32995	8.74249	2.59493e-06
6620401K05Rik	-0.329701	9.12003	1.49036e-05
Mrps21	-0.329114	10.8405	0.00157212
9030619K07Rik	-0.328296	9.19221	4.54534e-05
Akp2	-0.326592	10.122	0.000527703
LOC381889	-0.325774	10.5871	0.000386997
Rbmx	-0.325413	8.32804	1.78429e-06
3000003F02Rik	-0.325306	9.224	0.000347917
Ssr2	-0.324805	12.9243	0.000703268
LOC381200	-0.32306	9.19402	0.000149773
Fpgt	-0.322863	8.64411	4.01527e-07
Grit	-0.322592	9.77618	0.00299302
Rab11fip5	-0.321132	8.75417	0.000310277
Cxxc6	-0.320541	12.4389	0.000742162
Blvra	-0.320493	9.69151	0.000112745
Spry4	-0.320472	8.84473	0.00743937
Cd3e	-0.319404	8.16402	0.0301072
Gemin4	-0.318842	11.3708	3.45921e-05
1700016D06Rik	-0.318466	8.23675	0.00927456
CRG-L1	-0.318231	8.58362	0.0210825
Ruvbl1	-0.318119	11.837	7.38683e-06
BC051080	-0.317924	8.71125	2.75834e-05
Ndrg1	-0.317719	8.71368	0.00153946
Cad	-0.317493	10.4772	0.000378631
Pola2	-0.316893	10.6504	4.17879e-05
Vegfa	-0.316883	8.83872	9.32029e-07
C330001N20Rik	-0.316863	12.1976	0.000494964
LOC245350	-0.316719	8.59572	0.000224046
Ppm1k	-0.316302	8.85695	1.69936e-05
5730509K17Rik	-0.315507	8.94671	0.0487839
Gloxd1	-0.314439	8.65487	2.50923e-05
2900060P06Rik	-0.314165	8.08235	7.35387e-06
1190002F15Rik	-0.313633	9.07503	0.00397736
Txnip	-0.313595	12.238	9.85331e-06
6720469N11Rik	-0.313038	9.65402	0.0243438
Cnn3	-0.312988	10.9447	0.0428558
D730049H07Rik	-0.312323	9.26238	0.000601066
Vat1	-0.311974	9.49226	0.000651182
scl0001333.1_125	-0.311505	8.11577	0.000410724
BC035291	-0.311383	9.77826	0.0158102
Mical3	-0.311293	8.68566	0.000101552
2010204K13Rik	-0.310432	9.10074	2.3485e-05
1110030K22Rik	-0.31017	9.08158	0.00878165
Stard4	-0.310137	9.00017	0.0247363
ZBTB45	-0.30875	9.18501	5.74142e-05
Zfyve20	-0.307842	9.08356	0.00116608
Mbnl2	-0.307276	10.1457	0.00923771
MGC99845	-0.30721	8.08864	4.1505e-06
Isy1	-0.307087	11.7044	2.30682e-05
Wdr6	-0.307047	9.71324	0.00666279
Nos3as	-0.30661	9.17933	0.00716718
Nodal	-0.306244	10.6798	2.08e-05
E230002P03Rik	-0.305818	8.42648	0.000196159
Tuba4	-0.305687	8.63372	0.000774354
Bach1	-0.305613	10.2031	0.00122243
Sdfr2	-0.305192	9.81007	0.00554934
Enpp5	-0.304664	8.79127	0.000751265
Atp5g1	-0.304658	12.9956	0.00992848
Aqp3	-0.304596	8.81437	0.00924691
Acac	-0.304498	10.977	0.000110252
Pank1	-0.303921	8.74072	1.2465e-05
Chst3	-0.303821	8.16518	2.39481e-05
Trps1	-0.303366	8.72326	9.35411e-07
S100a13	-0.303315	8.88962	0.0224949
A930026I22Rik	-0.302929	9.27545	0.000812339
1810014F10Rik	-0.302896	10.7704	0.00130066
4732436F15Rik	-0.302827	8.51734	4.0272e-06
Poli	-0.302794	9.65679	0.000365854
Atp5o	-0.30206	13.0807	0.000106913
Mocs1	-0.301687	9.431	0.000632252
Spc24	-0.301387	9.92441	0.023105
Lrrc28	-0.301286	9.22424	0.000195
Fstl	-0.30018	8.47336	0.00512234
Robo1	-0.299542	8.42425	3.45552e-06
B230219D22Rik	-0.298969	9.95574	0.00112301
Uchl1	-0.298967	10.1779	0.0298966
A930005G04Rik	-0.298628	10.126	0.000820006
Dbr1	-0.298378	11.5118	2.42843e-05
4931407G18Rik	-0.298236	8.30001	0.000152031
Supt3h	-0.298054	10.8484	0.00020105
D930048N14Rik	-0.297622	9.26097	0.000122704
Rfx2	-0.297561	10.8221	0.00942705
Tpbg	-0.297413	9.46283	0.00508564
Tufm	-0.297196	12.766	0.000343913
Nupl2	-0.296945	9.60274	0.0172028
Fars2	-0.296138	10.8061	0.00031316
Gys3	-0.295867	8.84595	0.00985122
Pygb	-0.295486	9.31413	0.000119869
Bbs2	-0.294886	8.6148	0.000669736
Plekhb1	-0.294734	8.48366	9.32296e-05
Calca	-0.29447	9.2729	0.000340382
Dlg5	-0.294031	10.6854	0.000382078
Cdipt	-0.29315	10.0088	1.11038e-05
Pde4d	-0.292472	8.27316	6.60498e-07
Tm4sf6	-0.291997	8.51006	3.10602e-05
Lzf	-0.291973	9.45187	0.0105225
5830412B09Rik	-0.291832	10.1812	0.00379862
Upf2	-0.291808	11.5728	0.00357693
Psip1	-0.291807	11.6147	0.000289114
LOC236427	-0.291798	8.03827	0.00415567
BC030477	-0.291748	8.32405	2.54821e-05
Btbd14a	-0.290442	8.57141	7.28759e-08
5830467J12Rik	-0.290357	8.52076	0.0011386
Hhex	-0.289983	8.95598	3.1233e-05
Gabarapl1	-0.28919	9.54423	0.00555308
BC014795	-0.28891	8.69877	0.000212788
Cd81	-0.28886	13.1251	0.000190625
Gnpda1	-0.288161	10.806	0.000105732
BC035954	-0.287952	9.1635	0.00131301
1810027O10Rik	-0.287912	11.9431	0.000115218
1810006K23Rik	-0.287569	8.88058	1.81653e-05
Iqgap2	-0.287501	8.97157	0.00410317
Keo4	-0.287142	9.07276	1.30841e-05
Mrpl28	-0.286966	12.5875	0.000853701
Pdir	-0.28694	9.08146	6.56801e-06
1600023A02Rik	-0.286911	12.4012	0.0382953
Prdm14	-0.286885	8.10155	2.10097e-05
A630097D09Rik	-0.286761	9.62576	9.29932e-05
Bola3	-0.286672	10.6623	0.00776475
BC004022	-0.28616	11.3405	0.00976673
LOC384710	-0.285876	10.2351	0.00861445
Arhgap30	-0.285371	8.5641	5.33771e-06
Ssfa2	-0.28508	9.49165	0.00174334
Sod2	-0.284955	12.9122	0.00357245
Mrpl12	-0.284864	12.2845	0.00457348
AW060207	-0.284743	9.56326	7.53595e-08
Smarcd3	-0.284672	8.15374	0.0253961
Fbxl10	-0.284337	9.22831	0.00207705
Ttf2	-0.284052	10.661	0.000178801
Pdrg1	-0.284046	9.33615	0.0032025
LOC381683	-0.28371	8.57471	0.000327574
Smad5	-0.283636	8.81288	0.0147925
8030459N02Rik	-0.283387	11.8095	1.01268e-05
D030041G07Rik	-0.283234	8.30207	0.000332346
2310003L22Rik	-0.282569	9.01047	6.66449e-07
Lxn	-0.282249	9.16776	0.00454773
Zfp423	-0.282248	8.3632	4.67015e-06
Bid	-0.282027	9.49719	0.00193695
Tmsb10	-0.282025	13.6888	0.000600208
Gsta4	-0.281759	12.5236	0.000916793
Phpt1	-0.280257	10.8737	0.000425204
Fndc3b	-0.280198	9.31835	0.00432027
Idh2	-0.28013	9.75197	0.0357816
Pank2	-0.280074	10.738	0.000838711
Nrd1	-0.2792	12.2615	0.000393057
D10Wsu52e	-0.278762	10.9933	0.000420776
A530050D06Rik	-0.278687	8.25902	0.000428717
1110036O03Rik	-0.278672	8.17868	1.59075e-05
Lyplal1	-0.278311	8.59491	0.00692054
Odz4	-0.278147	8.99731	0.0201803
Mvp	-0.278141	10.1355	0.0361148
Arhgap17	-0.277635	9.77514	1.67631e-05
Psap	-0.277437	11.5344	0.000133326
Usp1	-0.276693	9.59011	6.57718e-05
Mrpl14	-0.276626	11.3114	0.000296754
Frrs1	-0.276441	10.2825	0.000201802
C230070D10Rik	-0.27623	9.97471	0.00119109
Chc1	-0.276092	9.85409	0.0102458
Ssb4	-0.276057	8.23788	3.95904e-06
DXImx40e	-0.275927	9.69318	0.000195203
Ly6g6e	-0.275485	9.24878	0.00160083
Pim3	-0.275025	11.9863	0.00438518
Pinx1	-0.274324	9.86737	0.00926748
Pla2g1b	-0.274008	12.4293	0.0162926
LOC245828	-0.273606	10.7714	0.00203474
Birc7	-0.273391	8.15709	0.000498056
Coasy	-0.273236	10.1539	0.000828141
Dab2ip	-0.272935	9.29022	0.000889247
4833425P12Rik	-0.272868	9.31557	0.00150601
LOC229665	-0.27246	8.66978	0.000916793
Atp2a2	-0.2721	10.1766	0.00332281
Capg	-0.272053	8.81851	7.49451e-05
3110053G12Rik	-0.27188	9.12633	0.000503714
BC060631	-0.2716	10.5191	5.37065e-06
Snx6	-0.271398	10.3472	0.000126539
Me2	-0.270748	9.254	1.20486e-05
2500001D14Rik	-0.270151	8.46821	0.0134382
D630036F01Rik	-0.270086	8.68342	0.00160089
6720463M24Rik	-0.270073	9.97054	0.00340941
Slc25a25	-0.270017	8.71297	0.00239272
5730409G15Rik	-0.269805	8.97176	0.000534011
Tagln3	-0.269309	8.2233	1.10329e-05
Wdr60	-0.26887	8.25871	6.95106e-05
Ctsf	-0.268418	8.16429	7.23918e-05
Sdcbp2	-0.26831	8.41795	1.00793e-07
E430026A01Rik	-0.267952	10.993	0.013291
Agpat4	-0.267713	10.2175	0.0245135
0610039J04Rik	-0.267591	11.2384	0.00025092
1110020P15Rik	-0.267518	14.4104	7.95026e-05
Brca2	-0.267513	9.12433	3.51064e-05
scl0002855.1_1056	-0.267317	9.03886	0.00735493
Gas6	-0.267249	8.50884	0.00239373
1110025F24Rik	-0.266984	10.5116	0.00497246
Mknk1	-0.266948	8.87992	3.29639e-05
1700019E19Rik	-0.266318	10.2665	0.0213178
Rnaseh2a	-0.265917	10.1964	0.0154782
Hspg2	-0.265737	10.6531	0.00153067
Ppp2r5c	-0.265646	10.3078	2.67934e-05
Foxred1	-0.265215	9.2655	1.40571e-06
D930046M13Rik	-0.26518	8.32276	0.0025922
Rage	-0.265112	8.6747	6.22065e-07
2900019M05Rik	-0.264463	8.76064	5.31813e-05
Dok3	-0.264158	8.18521	1.83041e-07
2810046M22Rik	-0.263633	9.79468	0.00239373
Nesg1	-0.263528	8.14789	0.000204417
Ebpl	-0.263305	10.1319	0.000916793
2210419D22Rik	-0.262933	10.7351	8.96925e-05
Foxn4	-0.262495	8.34638	0.00950367
2310079N02Rik	-0.262408	9.74356	0.0247363
Siva	-0.262153	13.4754	3.66998e-05
Smad6	-0.262134	8.40071	0.000920691
Plekhf1	-0.262075	8.68697	2.17127e-05
Arl2bp	-0.26201	9.00661	5.08705e-05
H1fx	-0.261976	9.2803	0.0314994
Aaas	-0.261722	10.357	2.8441e-06
Trim26	-0.261654	10.9285	0.0197286
Dhrs1	-0.261613	9.36175	0.000780016
Spryd4	-0.261568	9.06664	0.00652881
BC038311	-0.261534	10.3307	3.30875e-05
Was	-0.261294	8.32426	0.0128661
Zc3hdc3	-0.261194	9.19085	0.000215396
1810021J13Rik	-0.26092	8.44643	0.000210146
Slc35b3	-0.260551	9.11555	0.00120069
Rrm1	-0.260444	10.4105	0.00198697
Tmprss5	-0.260333	8.14306	2.29379e-07
Qtrtd1	-0.259952	8.8472	0.000502045
AI467606	-0.259582	9.01348	0.00214644
E130107N23Rik	-0.25931	10.4262	0.000205716
2610020H15Rik	-0.259272	8.64002	0.00104912
A230050P20Rik	-0.259121	10.0331	0.0350388
Cdc37l1	-0.258673	9.32921	2.22151e-06
Prkaa2	-0.2582	8.43258	0.000380328
4921511C04Rik	-0.258109	8.08666	0.000986855
Tmem14c	-0.257662	11.2785	9.16807e-05
9130404D14Rik	-0.257533	10.5242	0.0442126
2610200O14Rik	-0.257498	8.34076	2.06712e-05
Rnu3ip2	-0.257414	10.6109	0.00105194
9330134C04Rik	-0.257176	10.167	0.000865347
Calml4	-0.257113	8.43293	0.00730826
LOC218617	-0.257105	8.17955	0.000793456
1810020D17Rik	-0.256844	9.52026	0.0144459
Bcas3	-0.256818	10.5992	0.00384596
Unc13b	-0.256738	9.42036	0.00951817
Sfxn1	-0.256257	12.6317	0.000118906
2400003N08Rik	-0.256188	12.0889	0.0119326
Thumpd3	-0.256146	10.6548	0.00309624
5430426F23Rik	-0.256096	8.12162	5.77412e-05
D030012E24Rik	-0.256072	9.44952	2.59493e-06
2410131K14Rik	-0.256053	8.63287	0.00271697
Gtf2f2	-0.255911	12.0708	0.00152271
Myo1e	-0.255814	9.08932	0.00393138
Mt3	-0.255501	8.91194	0.0442964
A930010I20Rik	-0.2555	9.69192	0.000340382
Pldn	-0.255464	9.59451	0.0183882
Pgpep1	-0.254899	9.47447	0.000157601
Knsl5	-0.254791	9.70518	0.027435
Krt1-14	-0.254727	8.04621	0.000120367
Pcsk9	-0.254588	8.2657	5.25297e-05
LOC381132	-0.254557	8.28039	0.000233201
Blmh	-0.254417	10.3141	0.00279938
A230058N16Rik	-0.254381	8.49901	0.000510814
Dpm3	-0.254221	10.5288	0.0219545
Acacb	-0.254101	8.64199	1.2111e-05
1100001A21Rik	-0.254058	9.23474	0.0364929
LOC233637	-0.254047	10.7651	0.00455832
Abcf2	-0.253857	11.5916	1.91027e-05
9430023L20Rik	-0.253756	10.8555	0.000686813
Sp5	-0.253638	8.40073	0.00161515
Hspb8	-0.252608	10.6532	0.0119026
Rbm8	-0.252473	10.2471	0.00652172
Dgkz	-0.252267	9.10628	2.53823e-05
Thop1	-0.252003	10.7055	0.00115757
2610510H01Rik	-0.251973	8.72707	0.00287818
Zadh2	-0.251662	8.54481	0.00204007
9430022A14	-0.251423	8.11416	0.000353662
Atad3a	-0.251314	11.7117	0.00597634
Cdx1	-0.251074	8.11047	0.00439169
Prdm2	-0.250848	10.6703	0.000564578
Sin3a	-0.250096	11.2148	0.0015587
1500001M20Rik	-0.249903	10.7938	0.000162401
BC048355	-0.249518	9.50686	0.0187268
6230415M23Rik	-0.249384	9.17268	0.000599557
Nos3	-0.24903	8.23415	0.000231666
Alg6	-0.24859	9.80566	0.00250797
Sod1	-0.248262	12.7073	0.000645854
1700030K09Rik	-0.248245	9.09259	8.29371e-05
Dorz1	-0.248216	9.04897	0.000144658
Myd88	-0.248045	8.77866	2.14716e-05
Sema5b	-0.248011	8.12258	0.00196673
1700028N11Rik	-0.247743	8.44557	0.00439423
Fignl1	-0.24712	11.6089	0.00474444
Pip5k2a	-0.24682	9.39456	0.00334024
LOC269515	-0.246593	10.3142	0.00093193
Plcd3	-0.246478	8.24303	0.000262064
Usp48	-0.246422	9.94996	1.28962e-05
Bag1	-0.246401	13.2773	0.00663362
B230385N19Rik	-0.246053	8.31774	7.80227e-05
Tnk2	-0.245969	8.76894	0.000827448
Gig1	-0.245875	8.53643	0.000105349
Rpl3l	-0.245796	8.92894	0.000380514
1110014O20Rik	-0.245439	8.87485	0.00798595
Flrt3	-0.245314	8.43051	0.000383991
Fgf15	-0.244928	8.24048	0.000163265
Bcl6	-0.244722	8.67262	0.0104042
Napsa	-0.24443	8.1036	5.35601e-06
8030474H12Rik	-0.244297	8.7117	0.0002718
Luzp1	-0.244084	10.2289	0.000527938
LOC381297	-0.244082	10.2748	0.017174
Ipmk	-0.243903	9.78152	0.017762
LOC333669	-0.2439	8.09535	4.64755e-05
Tubg2	-0.243202	8.86286	0.000419799
Narg1l	-0.243168	9.71302	0.000285742
9630025B04Rik	-0.242915	9.88338	0.0340872
Pkp3	-0.242643	8.4832	0.0023481
5830482G23Rik	-0.242326	9.66929	0.00987828
Pter	-0.242225	8.98293	3.46167e-05
BC032967	-0.242208	8.38703	3.18632e-05
Pdxp	-0.242062	9.98577	0.00414042
2810032E02Rik	-0.242049	8.38211	0.00770029
Slc25a26	-0.241789	9.19207	0.000931389
Nol1	-0.241344	9.55612	0.00170095
Sox2	-0.241205	10.534	0.00140574
Pold3	-0.240897	10.9124	0.0011657
Ptch1	-0.240796	8.75923	1.67218e-05
Mif4gd	-0.240678	10.1138	1.5031e-05
Ppie	-0.240217	10.1124	0.000106886
Dact2	-0.240171	8.4776	2.06712e-05
Stac2	-0.240153	8.67468	0.00268491
Slc25a28	-0.24015	11.066	0.00685915
Col4a1	-0.240003	9.06762	0.0183006
Ssna1	-0.239957	10.406	0.000269793
BC017133	-0.239938	10.405	0.00958361
Pou5f1	-0.239853	13.2584	0.0221337
LOC380694	-0.239748	8.10176	0.0023066
H2afz	-0.239445	13.1142	0.00427592
5730419I09Rik	-0.239058	9.34045	0.0113086
Gngt2	-0.238793	8.43105	2.4389e-05
Gpr20	-0.238788	8.19866	1.87029e-05
Akap11	-0.238749	9.35918	0.00443848
Myo1g	-0.238529	8.13157	0.00106009
Vpreb3	-0.238477	8.18032	1.67898e-05
2310051F07Rik	-0.238471	10.2237	0.00093917
Wnt3a	-0.238257	8.0861	0.0448138
Pdlim4	-0.238233	8.29984	0.00062232
1110014J17Rik	-0.23769	12.1196	0.00634561
Trak1	-0.237313	9.15547	0.0144209
E330035H20Rik	-0.237003	8.14879	0.000115406
Tes	-0.236584	9.69232	0.00600803
4732467B22	-0.23634	8.12311	3.66465e-05
Adamts4	-0.235921	8.10401	0.00188048
Copz1	-0.235711	11.1249	0.00193535
Stk22s1	-0.235027	8.05729	7.17829e-06
1700023M09Rik	-0.234359	10.9277	0.00157212
Aplp1	-0.234209	8.96901	0.0262455
Snn	-0.234146	9.27664	2.88866e-05
Mbc2	-0.233967	9.16052	2.00168e-06
Polh	-0.233924	8.98203	0.0231803
Znrd1	-0.233892	11.4992	0.00957018
Pold2	-0.233593	11.2408	0.0140255
Mrpl35	-0.233494	8.70231	0.00605024
Olfr985	-0.233447	8.253	4.70764e-05
Rap1gds1	-0.233412	10.9288	0.0209482
Aldh18a1	-0.233091	10.3827	0.00124764
Trappc1	-0.23286	11.4766	0.00196887
Snapc4	-0.232359	10.2213	0.00817588
Ung	-0.232293	10.2861	0.0010065
Mcam	-0.232199	8.90285	0.00802441
Prkrir	-0.232058	9.39906	0.0185806
2810001G20Rik	-0.231878	8.42497	0.00386256
Ctsc	-0.231868	8.44871	0.000211895
LOC380718	-0.231796	8.8644	0.00281165
Peg3	-0.231409	10.104	0.0092323
Mtf1	-0.231288	8.63135	6.42196e-05
Hnrpdl	-0.231071	10.2976	0.000526305
3110002L15Rik	-0.231061	9.57963	0.000233201
LOC232879	-0.230985	10.109	0.00446847
Setd6	-0.230947	10.5752	0.00167419
Fbxw5	-0.230874	10.7896	5.60689e-05
D10Bwg0940e	-0.230539	8.69667	0.0169584
9530018I07Rik	-0.230474	9.25464	0.0134464
Def6	-0.22996	9.26365	0.0172312
AI314180	-0.229885	9.01591	0.0279122
Adpn	-0.229801	8.05366	5.13065e-06
D0H4S114	-0.229778	10.6273	0.0338678
Mcee	-0.229615	10.8558	0.00139183
Sc4mol	-0.229382	11.2853	0.00416326
LOC385493	-0.229137	8.14475	0.00307657
Sdf2l1	-0.22871	9.18962	0.000667264
Erf	-0.228554	8.48957	0.0306868
Zic3	-0.228365	10.7241	0.0380358
LOC382087	-0.228223	9.61705	0.0124181
Rdh11	-0.227992	10.2555	0.0265477
AU021838	-0.227764	10.136	0.00105721
Aplp2	-0.227716	12.4831	0.0420483
Slc25a19	-0.227499	9.57906	0.000542283
0910001L09Rik	-0.22742	11.8742	0.0139166
2310003H01Rik	-0.227406	9.64124	0.00146512
Marveld1	-0.227374	8.49509	0.0119593
Agtrap	-0.227354	9.64698	0.00547613
Nudt5	-0.227351	12.0875	0.00271112
Mrps5	-0.227278	10.2425	0.000230681
Dusp14	-0.227128	8.43344	0.000377018
6230400G14Rik	-0.226955	8.2977	7.98539e-06
2310036D04Rik	-0.226854	8.3561	0.000123969
Ift81	-0.226588	9.18371	4.04081e-05
Enpp4	-0.226475	8.62785	0.00292573
Chn2	-0.226446	8.18707	1.65129e-05
Cklfsf6	-0.226365	9.91357	0.0133238
Cln3	-0.226299	9.33993	0.0193181
Anpep	-0.226209	8.12053	0.0009126
Lrrc15	-0.226197	8.48727	0.0115499
1700041B20Rik	-0.226161	8.90529	0.00486493
BC044804	-0.225946	8.4609	0.00156107
C330027I04Rik	-0.225862	9.24618	0.000258495
1700095N21Rik	-0.225758	8.26563	0.000942
Wipi1	-0.225611	8.86994	4.64245e-05
Hyal2	-0.225538	10.962	0.000867658
Zfp261	-0.225401	9.31554	0.000165912
Ppp1r9a	-0.225314	9.92933	0.0392913
4632404H22Rik	-0.225226	9.47233	0.0295817
B430110C06Rik	-0.224901	8.38647	5.73008e-05
A230005G17Rik	-0.224586	8.49215	0.000224863
2310022A10Rik	-0.224527	10.1888	0.000120651
BC023055	-0.224262	8.62604	0.00720867
BC052040	-0.224225	10.5402	0.000427849
9630033F20Rik	-0.223829	8.21646	0.000179753
Rars	-0.223791	11.5998	0.00558243
2610018L09Rik	-0.223534	10.587	0.0105719
Sepx1	-0.223388	8.41188	0.000259733
1500031L02Rik	-0.223348	10.0814	1.81653e-05
Bbs7	-0.223285	9.09937	0.0077153
2500002L14Rik	-0.223282	11.5768	0.00131301
LOC383712	-0.222994	12.9081	0.000770792
scl0002449.1_77	-0.222768	10.8721	0.0052638
Bcl7a	-0.222766	10.0355	0.00864292
Zfp96	-0.222559	10.4796	0.00965116
2010317E24Rik	-0.222442	10.0713	0.00512719
AU040829	-0.222389	9.63456	0.01334
Clcnkb	-0.222094	9.65735	0.0132411
B830028P19Rik	-0.222077	8.83436	0.00987828
C230081A13Rik	-0.221902	8.31938	0.000278612
LOC380705	-0.221655	8.68099	0.00724951
Th1l	-0.221563	10.2994	0.00278459
Garnl4	-0.22146	8.69656	0.000236641
D0HXS9928E	-0.221224	9.94834	0.000623843
D4Bwg1540e	-0.221168	8.18361	5.77412e-05
Ly6g6d	-0.220975	8.23546	0.0037576
Nudt4	-0.220917	10.4967	0.0475522
1200014P03Rik	-0.220791	9.1195	0.00392342
6720427H10Rik	-0.220789	8.59898	0.00258905
Jtb	-0.2207	11.5078	0.0446121
Hsd17b4	-0.220335	11.5718	0.0442653
Snrpa1	-0.220245	11.184	0.0339145
Tpcn2	-0.220215	8.31014	7.62404e-05
Epb4.1l1	-0.2199	8.41117	0.0115267
Gpx7	-0.219328	9.74189	0.0180054
D330024H06Rik	-0.219233	8.96824	0.0224949
Cd1d1	-0.218963	8.47958	0.0157528
Sox7	-0.218827	8.07485	0.00297139
Chst10	-0.218489	8.12708	8.38272e-06
As3mt	-0.21847	8.43684	0.00105099
Pttg1	-0.218188	8.22855	0.00984453
Tpmt	-0.218103	8.68435	9.63244e-07
Hexb	-0.218026	9.10479	0.0106404
9530090G24Rik	-0.217908	9.8009	0.00749962
5530400P07Rik	-0.217578	10.7658	0.0172918
9030624J02Rik	-0.216856	9.36151	0.00580158
Tekt1	-0.216558	8.05453	0.00904141
Slpi	-0.216176	7.95641	0.00366375
Cd79b	-0.216164	8.09948	9.20856e-05
Angptl4	-0.216074	9.02084	0.0124742
Eif5a	-0.216019	13.1803	0.00624929
Ptch2	-0.215981	8.05102	4.92714e-05
Psmf1	-0.215978	9.83883	5.66395e-06
Psmd10	-0.215951	10.0656	0.000778572
Cenpp	-0.215755	9.99897	0.000114801
1200003O06Rik	-0.215667	10.5518	0.00261167
Col9a2	-0.215598	8.5315	0.00357693
Tex14	-0.215517	10.4702	0.04387
Prdx2	-0.215344	12.5242	0.0301186
Pgm2	-0.215294	12.5905	0.0097024
Mgea6	-0.215067	11.2273	0.00460129
Cbs	-0.215017	8.40763	0.00223934
Psmd13	-0.214624	13.2959	0.0100514
Ulk1	-0.214554	10.2041	0.00203474
Rad51c	-0.21455	9.9206	0.0115123
Rab4a	-0.214491	9.69248	0.00257139
Rmnd5b	-0.214481	8.76145	0.00568266
H2afy	-0.214344	11.8992	0.016035
scl0001487.1_50	-0.214344	10.7869	0.0077153
Erich1	-0.214108	9.82173	0.00823974
G630064H08Rik	-0.213384	8.68307	0.0309527
2610034N24Rik	-0.213334	11.8792	0.0146514
4931433E08Rik	-0.213277	9.66374	0.00451562
Ndufv2	-0.21321	13.2343	0.0187268
Actn1	-0.2131	12.2298	0.032633
Ivd	-0.21305	9.04865	0.00111981
Pex11a	-0.212918	8.63549	0.00164452
Rad51ap1	-0.212549	9.00203	0.000889247
Snrpd2	-0.21246	14.0547	0.00407969
Renbp	-0.212345	10.7539	0.0195938
Slc26a6	-0.212283	8.23374	0.000612963
5730437N04Rik	-0.212241	11.2634	0.00877606
Isyna1	-0.211978	9.75449	0.0164623
Plrg1	-0.211593	13.2485	0.00564881
BC024659	-0.211547	8.74197	2.18178e-05
Zbtb7	-0.211488	9.32834	0.00690584
Ifitm5	-0.2114	8.11343	0.00106995
Blm	-0.211276	10.9482	1.35927e-05
Galm	-0.211204	8.449	0.00700309
BC065085	-0.211174	8.09673	0.0110274
Sec13l1	-0.210745	13.1367	0.0109839
4930455G09Rik	-0.210673	8.1843	0.028613
4833441B18Rik	-0.210469	8.37748	0.0068931
2700007B13Rik	-0.21043	8.71124	0.00132721
LOC383249	-0.210229	9.48461	0.013602
Impdh2	-0.21016	13.8681	0.00764225
Gltp	-0.210079	11.0509	0.00831946
Entpd6	-0.210033	8.71751	0.00234478
LOC381995	-0.209924	8.60819	0.00186101
Kpna1	-0.209763	10.1223	0.0453922
Nfx1	-0.209314	8.85817	0.00075742
Zfp36l1	-0.209032	12.2195	0.0251556
4732435K05Rik	-0.208902	8.76445	0.02697
1700034H14Rik	-0.208843	9.89145	0.020048
4932443D16Rik	-0.208484	8.41247	0.00109127
Ryd5	-0.208455	8.11711	0.000296754
Gm867	-0.208174	8.17539	0.000884447
Tnfrsf13c	-0.208045	8.14819	0.0337616
0610010E21Rik	-0.207966	9.48771	0.00476633
Pip5k2b	-0.207912	9.914	0.00448295
Rad23b	-0.207612	9.7929	2.78688e-05
1500041O16Rik	-0.2076	8.60712	0.0492161
LOC226486	-0.207473	9.26271	0.00447424
Uchl3	-0.20742	10.0673	0.00265164
B130017M24Rik	-0.207399	8.43044	0.014533
D4Ertd432e	-0.207316	8.80926	0.0105578
0610007N19Rik	-0.207284	8.74284	0.00287818
1110012L19Rik	-0.207258	9.06602	0.000853145
2610019F03Rik	-0.206976	9.29974	0.00855807
2610200G18Rik	-0.206776	8.42607	0.0274653
2600001J17Rik	-0.206531	10.1107	0.00155673
1100001D10Rik	-0.206416	10.1726	0.0182432
Pygo2	-0.206098	11.0435	0.0497517
Sar1a	-0.206018	9.55678	0.00116379
Gcs1	-0.205926	9.66565	0.0289927
1300001I01Rik	-0.205883	8.79272	0.00658681
Fbxo16	-0.205856	8.25297	0.0247363
2610203E10Rik	-0.205651	8.29812	0.0001008
Rae1	-0.205613	12.0507	0.00426879
Ubap2l	-0.205478	9.68693	0.0367621
Sema4b	-0.205368	10.9904	0.0190261
Nubp2	-0.205309	9.94357	0.00031392
E530004K11Rik	-0.205262	8.10737	2.8767e-05
6430601A21Rik	-0.205257	8.94654	0.00202022
Map4k3	-0.20523	10.2371	0.00389642
Obrgrp	-0.205212	11.019	0.0245871
Aspscr1	-0.20485	9.28869	0.000289114
Nasp	-0.204749	12.4564	0.00603143
Mrpl13	-0.204736	11.2714	0.0196481
Cbr1	-0.204574	9.4195	0.0122308
Wdr51b	-0.204478	10.2834	0.0195418
Epb4.1	-0.20433	10.0302	0.00262265
Ccdc109a	-0.204149	8.37788	0.00604015
5430432M24Rik	-0.204106	8.33997	0.000310277
Irgm	-0.203979	11.9587	0.0131887
X83328	-0.203836	10.2902	0.0360164
Smoc1	-0.203764	8.90358	0.020878
1810038L18Rik	-0.203728	9.41329	0.0103833
Casp7	-0.20357	8.27137	0.00660888
Mre11a	-0.203345	9.67108	0.000163087
Ctnnbl1	-0.203317	10.096	0.0107353
Napb	-0.203185	8.62982	0.0124096
D130027M04Rik	-0.203125	8.28782	0.0163764
Arhgap9	-0.2029	8.28529	0.00538263
BC022145	-0.202887	8.09969	0.000494482
St6gal1	-0.202699	10.0228	0.020878
Abhd4	-0.202656	9.44487	0.0275878
LOC732482	-0.202235	9.00365	0.00133533
C330042K07Rik	-0.202065	8.8684	0.00205795
Jmjd3	-0.201835	8.88935	0.0343327
1300006C06Rik	-0.201663	11.0445	0.00167831
Polg	-0.201362	8.51688	0.000178821
4930521E07Rik	-0.201314	8.55158	0.000120642
Dap3	-0.201156	12.6823	0.0227699
Trim25	-0.201148	10.0161	0.00821111
C730029F17Rik	-0.201107	10.1329	0.0184527
Mlp	-0.200933	9.61038	0.020229
Gna11	-0.200876	9.82328	0.0247089
Dpysl4	-0.200839	8.20349	1.85771e-06
5630401D06Rik	-0.200358	10.4379	0.0105447
Pcbp3	-0.200202	9.0182	0.00524463
Cdc42ep3	-0.200144	8.94611	0.0157748
Gzmm	-0.200055	8.38877	0.000351844
Mesdc1	-0.199919	8.39876	0.000218828
Slc22a18	-0.199795	8.26375	0.0108214
Acsl1	-0.199676	8.8522	0.00675193
BC006705	-0.199545	11.223	0.0357329
Klf13	-0.199388	9.84834	0.01712
Lmnb2	-0.19928	10.1676	0.00396694
Tmem143	-0.199199	8.67966	7.95026e-05
0610007P14Rik	-0.199002	10.4983	0.00270541
Nedd4l	-0.198926	9.57042	0.0087526
Txndc5	-0.198783	10.3136	0.0222115
Usp2	-0.198584	8.38181	0.000211687
Rabl4	-0.19858	8.7829	0.0142408
1190009E20Rik	-0.198571	8.90641	7.15986e-05
Gna15	-0.198564	8.51362	0.00380805
Cox5a	-0.198496	14.26	0.00554425
Axin	-0.198429	9.72886	0.000503714
4732495E13Rik	-0.198395	11.8413	0.0260744
C130052I12Rik	-0.198295	10.7517	0.0119887
Taf6l	-0.198015	8.08477	0.000258073
Fzd10	-0.197542	8.45505	0.0135079
5033421J10Rik	-0.197436	8.95529	0.00198219
Hdac5	-0.197402	9.34625	0.000826672
2010005E20Rik	-0.197049	8.47886	0.00816593
Fkbp10	-0.196873	8.45396	0.0269705
2610009I02Rik	-0.196776	9.61417	0.000878294
Ndufc2	-0.196518	11.4645	0.021303
2010003J03Rik	-0.1965	10.2291	0.00270002
2810418N01Rik	-0.196496	10.4515	0.0295728
1700012H17Rik	-0.196189	9.89803	0.00115254
Flot1	-0.196143	10.1558	0.00388071
2610205E22Rik	-0.196003	9.17275	0.00531601
1810032O08Rik	-0.195988	10.0738	0.00141635
5430440L12Rik	-0.195928	9.41746	0.000419159
Sfrs14	-0.195798	10.2911	0.0277013
G630055P03Rik	-0.195651	11.921	0.0161875
Rnf5	-0.195514	10.3733	0.0233952
9530014D17Rik	-0.195384	9.02061	0.00015298
Frmd4a	-0.195148	8.08176	0.000938582
Zfp259	-0.195079	10.5276	0.00183039
AI527266	-0.195045	8.422	0.000282882
E030003N15Rik	-0.194935	8.54853	0.0378888
Aco2	-0.194818	11.2895	0.000510055
Eml4	-0.194682	10.4367	0.00992436
Acot7	-0.194597	11.1643	0.0438203
Gm50	-0.193999	8.89657	0.0020477
Ctnna1	-0.193923	14.0103	0.00356152
Fcho1	-0.193841	9.32461	0.00281531
LOC268673	-0.193705	8.97293	0.0146703
2310044G17Rik	-0.19352	9.82975	0.0273294
1810015M01Rik	-0.193175	10.3515	0.00642087
Sh3bgrl2	-0.192795	8.42246	0.00366375
Lypla3	-0.192669	10.2276	0.0224163
Fgf10	-0.192487	8.06332	1.98167e-06
Trb	-0.192447	8.73414	0.00552227
D030051D21	-0.192387	9.35403	0.00164777
H2afj	-0.192382	9.16571	0.000446257
Tusc4	-0.192189	9.85473	0.0349086
Abr	-0.192039	8.29637	5.11712e-05
2310050B20Rik	-0.191808	10.012	0.0079517
Tada2l	-0.19146	9.20514	0.00100186
LOC381691	-0.191299	9.14402	0.0135677
Rai1	-0.191259	8.50062	0.000106031
Zfand2b	-0.191187	8.83937	0.0101218
Eif2b4	-0.190945	11.3021	0.00279763
Pip5k1a	-0.190634	8.25974	0.00229005
6330503K22Rik	-0.190462	9.44815	0.0229065
A430031N04	-0.190185	8.27925	0.000358077
Bcap29	-0.190045	10.6706	0.0110301
4931426K16Rik	-0.189593	8.15253	0.00051274
Gtf2f1	-0.189536	9.78661	0.00547613
Ubadc1	-0.189466	10.1583	0.00120238
Fbxo34	-0.189456	9.95824	0.000494482
Wdr9	-0.189384	8.85995	0.00300041
D10Ertd322e	-0.189331	12.2984	0.00453893
Cox18	-0.189316	11.5216	0.00527804
D11Bwg0517e	-0.189096	8.14522	3.07738e-05
0610040B21Rik	-0.18899	8.85254	0.0107025
C330006H24Rik	-0.188578	8.31091	1.39136e-05
Pltp	-0.188449	9.31579	0.0493283
1500011H22Rik	-0.18841	10.1955	0.00307657
Vax2	-0.188401	8.10542	0.00632988
Rapsn	-0.187966	8.23372	6.31148e-06
Fpgs	-0.187902	10.4975	0.0368873
LOC269355	-0.187889	11.5175	0.0443352
Hras1	-0.187878	9.89093	0.0172723
Plod1	-0.187808	8.40986	0.0357329
A430070A22Rik	-0.187633	8.64353	0.00109064
Skp2	-0.187399	9.73788	0.000250488
Sri	-0.187076	8.70363	0.000768901
Apex1	-0.187057	11.515	0.00394495
Atp5h	-0.186984	13.2304	0.00222775
2310042G06Rik	-0.186978	12.4771	0.0052638
1810060D16Rik	-0.186911	12.725	0.000438122
E030007H10Rik	-0.186196	9.11032	0.0208288
Rnf34	-0.186044	10.4012	0.00544565
4921509E05Rik	-0.185965	8.57368	0.000961565
A530030G15Rik	-0.185959	8.31266	0.0046055
Slc37a1	-0.185896	8.1222	3.86905e-05
Hmgcl	-0.185854	10.0491	0.0468722
Tomm7	-0.18582	11.6588	0.0212613
Pla2g12a	-0.185728	9.33633	0.031599
Rcl1	-0.18557	11.3739	0.00777194
Rohn	-0.185357	8.69807	0.0305483
Ube2g1	-0.185307	10.4914	0.0156636
LOC237877	-0.185196	10.1424	0.0286711
Lrrc49	-0.185046	9.00826	0.00151046
Acy1	-0.184924	9.92659	0.00374637
Rxra	-0.184682	8.34267	0.0169371
scl0003448.1_536	-0.184631	9.85934	0.0279862
4932442K20Rik	-0.184145	8.80989	0.0133073
3000003G13Rik	-0.183881	9.53361	0.0152968
Umps	-0.183774	10.166	0.00550576
Grpel1	-0.183638	10.5604	0.0258946
Helb	-0.183495	11.2061	0.00239272
Aacs	-0.1831	9.68327	0.0254915
Mrps25	-0.182909	8.70639	0.000253161
5930416I19Rik	-0.182881	11.9652	0.0121259
Bmf	-0.182791	8.58304	0.048511
Isca1	-0.18257	9.79478	0.0472489
2310007F21Rik	-0.182506	9.7112	0.0168858
Adprtl2	-0.182402	11.4341	0.00132397
Nfat5	-0.182308	8.81475	0.00109581
1810008A18Rik	-0.182124	9.65569	0.000730314
Insig1	-0.181958	9.18138	0.00115769
Vps18	-0.181787	9.63853	0.0186757
BC099439	-0.18174	8.3691	0.0357329
AW540478	-0.181716	9.14592	0.000562128
Rpain	-0.181676	10.1311	0.0153594
Mapk9	-0.181416	9.71686	0.00767587
C030026E19Rik	-0.18131	11.0031	0.00608584
C730026J16	-0.181242	10.4286	0.0108745
Apitd1	-0.181136	10.152	0.0202035
Mapk6	-0.180975	10.0617	0.00303757
Stx12	-0.180857	9.3385	0.0128703
Ctsz	-0.180853	8.72478	0.00451562
Rec8L1	-0.180379	8.94205	0.0242979
Ddx48	-0.180302	12.3176	0.049141
Paf53	-0.18026	10.2611	0.0480177
gi_6679936_ref_NM_008084.1__328	-0.180058	14.6693	0.022319
Mkrn2	-0.18005	10.0148	0.0184796
Timm44	-0.18001	9.95984	0.000636626
Tm7sf1	-0.179929	8.68852	0.00174511
Ascc3l1	-0.179928	9.86608	0.0272345
2700049A03Rik	-0.179868	10.0721	0.00457417
LOC217066	-0.179751	8.29941	0.0484762
Atxn7l2	-0.179402	8.97769	0.019061
Osbpl9	-0.179384	11.696	0.0300677
LOC215999	-0.179248	8.57615	0.0154359
Uqcrc1	-0.179116	12.2257	0.020835
Sdhb	-0.179077	9.96301	0.00167419
1700013L23Rik	-0.178791	8.89116	0.0418737
Pelo	-0.178594	10.9001	0.0250435
Itga5	-0.178578	8.68968	0.00116973
Clstn3	-0.17851	8.59649	0.0223236
Aabp3-pending	-0.178093	8.4791	0.0103816
Stk32a	-0.178076	8.102	2.52097e-06
Alas1	-0.177788	10.8781	0.00468745
2700083E18Rik	-0.177679	9.99943	0.0230502
Unc84a	-0.177586	10.3155	0.0410843
D10Ertd438e	-0.177472	9.97014	0.0140415
5730509C05Rik	-0.177079	9.49976	0.0498497
Amid	-0.176981	8.55949	0.000132311
Nsun5	-0.176931	9.11324	0.00141635
1600014C23Rik	-0.176577	8.40933	0.00777541
Dscr6	-0.176438	8.07498	0.00138379
Gm631	-0.176436	9.53487	0.0381137
Spg21	-0.176331	10.939	0.0489098
Cnot10	-0.17627	10.3501	0.0114179
Taldo1	-0.175921	12.9672	0.0115267
Il13ra1	-0.17557	8.13592	0.0101359
Fuk	-0.175019	8.91299	0.00522194
4930429O20Rik	-0.174977	8.41126	0.022354
LOC239122	-0.174749	8.56547	0.00293777
Usp3	-0.174631	9.43199	0.0124176
Slk	-0.174613	9.55057	0.00328863
Dkk3	-0.174487	8.24489	0.0199354
Calu	-0.174435	9.92771	0.00122353
A630022G20Rik	-0.174375	8.23429	0.00066419
AI464131	-0.174343	8.21225	0.000713063
Uqcr	-0.174236	13.5055	0.0225789
Gemin5	-0.174205	8.43807	0.00442606
Dcps	-0.173969	10.5914	0.0162836
LOC382911	-0.173737	8.53551	0.00234478
6430514L14Rik	-0.173597	8.17068	0.00120664
Eif3s10	-0.173449	10.4323	0.0195558
Tyro3	-0.173398	8.47516	0.0132072
Psmd7	-0.173325	11.4917	0.0092323
Atp6ap2	-0.17308	10.8152	0.00248491
Pnpo	-0.172906	8.91196	0.000567561
Mrps26	-0.172864	10.2784	0.00656857
BC023957	-0.172724	8.80055	0.00193535
AL022779	-0.17266	10.082	0.0263717
Ap2a2	-0.172597	9.96347	0.0224677
Prmt5	-0.172468	11.8598	0.00674871
LOC234987	-0.172228	11.0179	0.00864247
Nol6	-0.172119	10.5292	0.0168524
Tle3	-0.171981	8.23979	0.00193695
AL033326	-0.171931	9.90506	0.00700763
Mical1	-0.171868	8.33393	0.00419783
2700024H10Rik	-0.17175	9.47451	0.0114157
9330175B01Rik	-0.171721	10.3962	0.0274514
Nup85	-0.171659	11.8647	0.0434542
9430034D17Rik	-0.171657	9.30939	0.0128855
Xrcc2	-0.171489	8.72427	0.000909745
Tada3l	-0.171407	8.53021	0.00131528
LOC381150	-0.171385	8.34739	0.000624716
E130104I10Rik	-0.171334	8.44945	0.0037478
Tm4sf5	-0.171092	8.16443	0.000905586
Sbds	-0.171031	12.3328	0.0133509
Peci	-0.170884	8.97147	0.0299202
Nradd	-0.170656	8.58523	0.0372552
Kif3a	-0.170627	9.60755	0.00269037
Psmc3	-0.170401	12.0679	0.0430922
2810011L19Rik	-0.170352	8.19937	0.000703268
A630077B13Rik	-0.170348	8.0579	0.0109733
Gpr83	-0.170266	7.99381	0.000977692
Akr1a4	-0.170159	12.7998	0.00339663
Spon2	-0.169982	8.17848	0.0409497
Chek2	-0.169769	9.0587	0.00650571
Ddx41	-0.169544	11.512	0.00231369
Oact1	-0.169311	8.53944	0.0179937
BC024969	-0.16923	10.1388	0.000931065
Scotin	-0.169229	8.99327	0.0100514
G3bp	-0.169227	12.5558	0.0254521
C77668	-0.169023	9.63515	0.000474027
Nans	-0.168447	10.3934	0.0103813
Pus1	-0.168256	8.92448	0.000722633
Ndufs6	-0.168077	14.2893	0.00663362
Rap1ga1	-0.168046	8.66898	0.0443326
1700012G19Rik	-0.167686	13.2648	0.0187268
LOC224048	-0.167656	13.5113	0.0296495
Wbscr22	-0.167599	10.41	0.00682122
Il10	-0.167554	8.04718	0.00480867
B930008I02Rik	-0.167013	8.06316	0.00135222
2310058J06Rik	-0.166945	8.76661	0.00357245
Ppa1	-0.166923	14.0714	0.011104
Gm484	-0.166918	8.4058	0.0206429
scl00001.1_0_REVCOMP	-0.166806	8.46353	0.0310024
Zfp592	-0.166755	8.64138	0.0103813
Mgat3	-0.166671	8.36548	0.0405337
Tfb1m	-0.166483	9.13206	0.0057525
5830409B07Rik	-0.166204	8.27709	0.0218676
2410075B13Rik	-0.166129	8.84086	0.00190561
Wnt5a	-0.166045	7.99384	6.30337e-05
Nkx6-2	-0.165958	7.99833	1.54176e-05
Lsm2	-0.165784	10.7276	0.0150252
Tmc6	-0.165721	8.6803	0.000984022
Clspn	-0.165613	10.0415	0.00350951
Smtn	-0.165578	8.87212	0.00171832
Tiam2	-0.165521	8.04433	0.000592481
1700026B20Rik	-0.165483	9.4487	0.00232242
Slc13a4	-0.165471	8.09563	0.0428558
Gja4	-0.16528	8.14683	0.00350365
Ppnr	-0.165278	8.13302	0.0203569
Itgb4bp	-0.165143	11.7254	0.0261347
BC025833	-0.164945	8.81342	0.00799442
Cdv3	-0.164933	13.1428	0.0107635
Acn9	-0.164909	9.34387	0.0079517
D19Bwg1357e	-0.164873	13.1538	0.0435915
Nsdhl	-0.164643	8.86148	0.0121749
Atp5c1	-0.164422	14.2224	0.0301072
BC031601	-0.164321	10.8617	9.14084e-05
Prss15	-0.164059	10.3103	0.0186278
D8Ertd82e	-0.163986	8.27913	0.0354567
LOC382237	-0.163619	8.1234	0.00483061
Btbd2	-0.163474	8.90032	0.0108714
Rad1	-0.163432	9.61214	0.00767772
Rutbc3	-0.163127	8.86473	0.0275878
Ilf2	-0.163074	12.1466	0.00950383
Ampd1	-0.163073	8.36159	0.00789323
Gipc2	-0.162898	8.83398	0.0117192
Tor3a	-0.162781	8.64297	0.0192942
9430029L20Rik	-0.162671	9.16256	0.00682336
Slco4a1	-0.162641	8.76202	0.00652788
4930572J05Rik	-0.162162	9.8212	0.0144459
Mrpl49	-0.162052	9.94107	0.020048
Chchd6	-0.161867	9.61508	0.0432843
Rlbp1	-0.161768	8.16838	0.0166662
B130052G07Rik	-0.161736	8.07944	0.00749709
Coro2b	-0.161646	8.18696	0.00157953
2810026P18Rik	-0.161638	11.3824	0.0150038
Casp2	-0.16161	9.96447	0.0247363
Pik3c3	-0.1616	10.6465	0.0256072
Ard1	-0.161468	12.1145	0.00335387
6720456B07Rik	-0.161371	11.9545	0.00100325
Slc5a6	-0.161247	9.32789	0.0330276
Gnb1l	-0.161109	8.90526	0.0138509
Slc41a3	-0.160955	8.07135	0.0023996
Kcnj12	-0.160887	8.05673	0.00168831
Timm10	-0.160883	11.3803	0.00702747
0610039N19Rik	-0.160792	9.0807	0.0220506
4833431P12Rik	-0.160748	8.05785	0.00174002
Zfp148	-0.160609	8.85394	0.000308145
AI553587	-0.160446	9.03723	0.0187698
Rai16	-0.160385	9.15288	0.0248432
D16H22S680E	-0.160314	9.33492	0.00268813
4732475C15Rik	-0.160048	8.44566	0.0343454
1810047K05Rik	-0.160044	8.43085	0.00143196
1110004B13Rik	-0.160027	8.93552	0.00133526
scl0001379.1_70	-0.160016	8.41305	0.0112889
Rgs16	-0.159845	8.17832	0.00389259
6720406L13Rik	-0.159842	9.67517	0.0114157
Nxt1	-0.15977	9.83399	0.0222599
Khk	-0.159708	8.61123	0.0462234
D030049N18Rik	-0.159464	8.76117	0.00627467
E430026C09Rik	-0.159431	10.933	0.0169221
Fbxo42	-0.159182	9.12427	0.00255384
4432406C08Rik	-0.159148	8.0908	0.0105572
Zcchc8	-0.158954	10.3437	0.00163162
5330420J21Rik	-0.158848	8.05768	0.00157527
Pop5	-0.158759	11.7392	0.0245871
Mcm4	-0.158349	12.3815	0.0366366
3830422K02Rik	-0.158062	8.03263	0.00155639
2610018O07Rik	-0.158051	8.69441	0.00335489
2810025A12Rik	-0.158001	8.60693	0.00518971
5730406M06Rik	-0.157707	10.9731	0.0435625
Itgb4	-0.157654	8.75944	0.0434814
Sdc1	-0.157651	8.12406	0.000551133
9030625A04Rik	-0.157532	8.20585	0.00502315
9930031P18Rik	-0.157416	8.35935	0.00264194
3830430K15Rik	-0.157374	9.60022	0.0477607
Map3k6	-0.157073	8.40185	0.00304912
Car12	-0.156752	8.14452	0.000666571
2610318I01Rik	-0.156701	11.5869	0.0378577
C330016O10Rik	-0.156682	8.5492	0.0189347
Ddef1	-0.156649	8.7727	0.00131468
Prkcz	-0.156547	8.68892	0.00663362
1500036D03Rik	-0.156415	8.37499	0.0423515
Manbal	-0.156397	11.2647	0.0348506
BC042423	-0.156358	8.17874	0.023547
Dhcr7	-0.156301	8.61361	0.0144459
Etfb	-0.156131	11.8148	0.0246126
Tmpo	-0.156058	9.60297	0.0116449
Rutbc2	-0.155865	8.5574	0.0216955
2310005O14Rik	-0.155802	9.90452	0.0426816
Fchsd2	-0.155509	9.79771	0.0261347
Itga10	-0.155328	8.16945	0.00112682
Tspan32	-0.155312	8.01765	0.00567408
Ahcyl1	-0.15531	10.4876	0.0203886
A730063M14Rik	-0.155249	9.21134	0.00486867
Ckn1	-0.155178	8.81088	0.000916793
AU020206	-0.155135	9.32282	0.0330247
Psma7	-0.154959	13.089	0.00431903
Jtv1	-0.154848	10.4139	0.020229
4432409B16	-0.154739	10.8498	0.00702747
Zfp637	-0.154705	9.05081	0.00201825
Pstpip1	-0.154611	8.3539	0.02657
Nrarp	-0.154508	8.59035	0.0170808
Apob48r	-0.154433	8.36634	0.000210146
BC028799	-0.154371	8.21545	0.00458404
Fads2	-0.154281	8.47384	0.0299011
Atp5d	-0.154279	11.3645	0.0398835
Arhgap4	-0.154156	8.42266	0.00670323
Lrrc59	-0.154152	10.3727	0.00652881
4631405K08Rik	-0.154139	8.18589	0.00669189
Mybbp1a	-0.154136	10.67	0.0212613
Ppef2	-0.15413	8.33046	0.0358499
E430019H13Rik	-0.153876	10.3064	0.0356523
Mmp15	-0.153755	8.27199	0.00512719
Mrps12	-0.153241	12.5434	0.0278704
Klf2	-0.153204	11.5028	0.0288101
Nol8	-0.152955	11.3272	0.0119589
Pcsk7	-0.152896	8.6215	0.0149093
Lrig1	-0.152782	8.6807	0.0195709
scl0004020.1_31	-0.152776	11.2337	0.0361553
Cant1	-0.152559	9.14754	0.00723321
Sec6l1	-0.152405	9.41451	0.00922824
Abhd14a	-0.152351	8.23753	0.0024073
Pcp4l1	-0.152305	8.05058	0.0229065
C530027B15Rik	-0.152	8.58302	0.0131344
Ext2	-0.151857	8.48378	0.00103897
Ppp2cz	-0.15179	8.62756	0.00906528
Tmem63a	-0.15146	8.55595	0.0286694
Cutc	-0.151392	9.3127	0.00832991
A930008A22Rik	-0.151362	8.69059	0.00202434
2410003P15Rik	-0.15096	9.36958	0.00214286
2210021A15Rik	-0.150394	10.5425	0.0273294
BC057371	-0.150368	8.56695	0.0298965
Cd2	-0.15026	8.0366	0.0011108
BC004701	-0.150258	8.38603	0.0133757
Mmp14	-0.150216	8.98254	0.0314482
Npepl1	-0.150182	9.84757	0.0350388
2610014F08Rik	-0.149963	8.96196	0.0425673
Pnma2	-0.149941	10.7208	0.0370611
Rnaseh1	-0.14971	9.6463	0.0289381
D5Bwg0834e	-0.149625	10.1507	0.0220334
Ier5l	-0.149609	8.86404	0.0273741
2310042L06Rik	-0.149582	9.10312	0.00569792
Trp53inp2	-0.148795	8.43891	0.0119593
Ptp4a3	-0.148726	8.71374	0.0138509
Txnl4	-0.148509	12.5407	0.00372381
2610017J04Rik	-0.148502	9.79207	0.0188758
Smad3	-0.148263	9.137	0.0472033
Ipp	-0.148118	8.81202	0.0287615
B230373P09Rik	-0.148068	8.55605	0.0349086
9030409G11Rik	-0.147739	8.17987	0.000194429
BC021614	-0.147526	8.30183	0.0116995
Rps25	-0.147434	14.6949	0.0378577
LOC245522	-0.147154	8.6387	0.00464803
Aldh3b1	-0.147061	8.21875	0.000379957
Prnpip1	-0.147004	9.10509	0.00620492
Camkk1	-0.14698	8.07205	0.00677494
Znhit1	-0.146699	9.82953	0.0378788
Tbl1x	-0.146291	9.87706	0.00802441
Plek2	-0.146205	8.18757	0.000805322
Ube2q2	-0.146162	8.85443	0.0245831
1110001K21Rik	-0.146122	11.0109	0.00888949
Gmcl1	-0.146098	9.755	0.00111547
Snrp1c	-0.14605	9.6599	0.0347563
Ppp1r9b	-0.145725	8.34468	0.00586563
1110007L15Rik	-0.14526	11.28	0.0092965
Apip	-0.145171	8.2588	0.000103391
scl0002785.1_49	-0.145091	8.19691	0.00899683
Sppl3	-0.144972	10.7555	0.0288305
Dapp1	-0.144872	8.14833	0.00700763
BC034076	-0.144677	8.02785	0.0220256
AU020772	-0.144571	9.1165	0.0250637
C430003P19Rik	-0.14414	9.66667	0.0314619
A930038D06Rik	-0.143862	8.49964	0.0491045
Aldh4a1	-0.143801	10.5197	0.0409497
Dpm2	-0.143769	9.26854	0.0470979
Stat5a	-0.143725	8.14845	0.00626465
LOC383953	-0.143698	8.27146	0.00904141
9330102E08Rik	-0.143664	8.18003	0.0110917
Cbfa2t2h	-0.143568	8.40306	0.000791512
1810020C02Rik	-0.143358	8.18922	0.0062365
Mapk3	-0.143306	8.45053	0.00793684
Chga	-0.143107	8.09707	0.00104912
Ift140	-0.143076	8.71449	0.00365499
Sntb2	-0.142963	8.88315	0.0230073
Amhr2	-0.142947	8.5703	0.00256179
Isgf3g	-0.14274	8.64417	0.00483726
B230209J16Rik	-0.142631	8.22625	0.00956564
Nek3	-0.142417	8.94813	0.0463385
Tdgf1	-0.142108	8.52111	0.021963
Cdadc1	-0.142006	8.2883	0.00155124
Elf2	-0.141982	8.51439	0.000114801
2210413P10Rik	-0.14181	8.08078	0.00184177
3230401M21Rik	-0.141784	8.4923	0.00345943
LOC212390	-0.141623	8.16571	0.00558267
A730005H01Rik	-0.141258	8.10079	0.00855807
Ppapdc2	-0.141177	8.26079	0.014293
Ksr	-0.140863	7.99768	0.00376585
Arl8b	-0.14075	10.2117	0.0372401
AB041568	-0.140311	8.13833	0.0264077
Prpf38b	-0.140271	9.0297	0.032218
Suv420h2	-0.140077	10.8672	0.0267945
LOC381151	-0.140034	8.0396	0.0117847
Ttc19	-0.14	9.14564	0.0029181
1110014D18Rik	-0.139977	10.4734	0.0245365
Pps	-0.139944	9.19658	0.0266669
Emd	-0.139907	10.0401	0.0244994
C730013O11Rik	-0.139847	8.23367	0.0287615
Ttll5	-0.139799	7.99702	0.0231119
Mbd4	-0.13976	9.22475	0.03293
Dhx33	-0.139519	8.91499	0.0288571
Slc4a1	-0.13947	8.03304	0.00456368
LOC114601	-0.139413	8.03858	0.00271077
Gm1070	-0.139373	8.15678	0.0178174
Btbd12	-0.139277	10.4211	0.0286365
Ctrl	-0.139185	8.20628	0.0102675
4922501C03Rik	-0.138862	8.31726	0.0084005
Dlgap3	-0.138772	8.08155	0.00163411
5830476B15Rik	-0.138768	8.85792	0.0321101
4732472I07Rik	-0.138711	8.03545	0.0471779
Mrpl20	-0.13856	9.16404	0.0364087
Bcl2l2	-0.138515	8.9979	0.00209448
Secisbp2	-0.138258	8.98592	0.0332767
Ptcd2	-0.13823	8.88364	0.0102448
9930032E18Rik	-0.137906	9.2115	0.0398835
Rasa3	-0.137848	8.31905	0.00349277
Pfkfb3	-0.137836	8.06427	0.00864853
Rnf40	-0.137571	9.18604	0.0103983
BC025462	-0.137413	9.09417	0.0146553
B230311C12Rik	-0.13733	8.28065	0.0422385
B230317C12Rik	-0.137289	8.61662	0.0315559
Dguok	-0.137234	9.84271	0.0388993
Banf1	-0.13716	12.2681	0.0192897
D530030K12Rik	-0.137151	8.1756	0.0052638
Snx9	-0.136893	8.72815	0.00875658
2310004H21Rik	-0.136845	8.20827	0.00142626
Gsdmdc1	-0.136743	8.15946	0.031161
Psmd12	-0.136728	11.1298	0.0299011
Lcmt1	-0.136645	10.7322	0.0049352
Map1lc3a	-0.13656	8.40018	0.00142626
2210021J22Rik	-0.136553	8.84112	0.00489139
Vcp	-0.136476	13.7438	0.0210978
Sp2	-0.136451	8.37658	0.0022206
Trp53	-0.136403	10.5493	0.0386969
Muted	-0.136363	9.13259	0.000793456
Nap1l1	-0.136224	11.2666	0.0355994
Ebi3	-0.136108	8.12888	0.0124998
Itgae	-0.136023	8.20991	0.0168108
Cox15	-0.135963	10.3798	0.0207677
Cdc14b	-0.135699	9.06845	0.0327143
Traf3	-0.135349	9.1407	0.0205755
Zbtb5	-0.135261	8.75697	0.0248942
BC026996	-0.135232	8.20487	0.00262023
Piga	-0.135197	9.43946	0.0484758
6430517G15Rik	-0.135069	8.07281	0.0112363
5330408N05Rik	-0.135052	8.51522	0.000889247
2700085M18Rik	-0.134997	8.50199	0.0484885
D14Ertd500e	-0.134947	8.45043	0.0345148
2610021K21Rik	-0.134803	8.6462	0.00868373
Tbl2	-0.134699	9.44795	0.0230502
6330505N24Rik	-0.134636	8.28643	0.0103198
Nfs1	-0.134504	8.6567	0.000793456
Pabpc4	-0.13445	12.0607	0.028967
Apom	-0.134364	8.05672	5.40485e-05
C130020P08Rik	-0.134327	8.07222	0.00660888
Atp10d	-0.134287	8.08269	0.0143972
Rps6ka1	-0.134247	11.3339	0.0272898
Cdc42ep2	-0.133932	8.33869	0.00863516
Ndufa8	-0.133823	11.5618	0.00694086
Cox6b	-0.133728	13.4634	0.0160123
Hist1h2ak	-0.133327	14.7273	0.0314225
4930527B16Rik	-0.133326	8.59847	0.0387617
Nnmt	-0.132825	8.13384	0.0403541
Slc25a5	-0.132811	14.697	0.0473358
2610304I02Rik	-0.132727	8.44027	0.00958361
scl0003078.1_29	-0.132524	8.49501	0.0132072
Noc2l	-0.132407	11.7836	0.0317138
5430417L22Rik	-0.132186	8.6324	0.043072
Catnbip1	-0.132176	9.75423	0.0391781
Ing3	-0.132105	9.21703	0.0206852
Figf	-0.132086	8.24514	0.0356523
Gtf2h4	-0.132056	10.6975	0.0336196
LOC333670	-0.132048	8.05866	0.0251532
Eef2k	-0.132008	8.14053	0.00959726
Slc7a6	-0.131865	8.35364	0.0322246
3110023B02Rik	-0.131823	8.91882	0.023395
Ndor1	-0.131655	8.57772	0.0197865
Abcg1	-0.131512	8.08683	0.0247363
Eftud2	-0.131196	11.0158	0.0134917
Atp9a	-0.131049	8.38692	0.00938888
Gnptab	-0.130628	8.71552	0.047534
Mpv17	-0.130555	9.7764	0.0302482
E430024F02Rik	-0.130073	8.05092	0.00724951
Zbtb8	-0.130024	9.1324	0.0225845
4930550B20Rik	-0.129986	8.33729	0.00215183
Soat2	-0.129929	8.40543	0.0257973
A230021I18Rik	-0.129897	8.16393	0.000995696
LOC380921	-0.129844	8.07201	0.000556678
Hebp2	-0.129567	8.23737	0.0346066
AI661438	-0.129311	8.39936	0.00284116
Col17a1	-0.129277	8.04179	0.00124406
Zfp472	-0.129181	9.2386	0.0130354
AW413632	-0.129159	9.17318	0.043222
Akna	-0.129024	8.39168	0.0366112
Kbtbd4	-0.128992	8.94385	0.0465342
Pias3	-0.128931	9.08187	0.0429003
2610510L01Rik	-0.128801	9.62427	0.0356197
AB041544	-0.128422	8.13566	0.00533191
6330411E07Rik	-0.128131	8.42961	0.0332637
E4f1	-0.128089	8.36955	0.0240139
Slc34a3	-0.128084	8.31925	0.0471779
AK129302	-0.127772	8.57943	0.0129878
4933436C20Rik	-0.127655	8.13213	0.00663362
B230342N21Rik	-0.127536	8.04447	0.0093509
Efna4	-0.127272	8.60746	0.00197304
Art5	-0.127257	8.54738	0.0119381
Olfr986	-0.127139	8.02681	0.00823572
Hectd2	-0.127094	8.29746	0.00396195
AI837181	-0.127027	9.1281	0.038279
Ask-pending	-0.126966	8.2723	0.00421654
Map3k1	-0.126698	11.349	0.0382953
AI894139	-0.126616	8.31901	0.0308339
Git1	-0.126594	8.30372	0.0414364
A930024E05Rik	-0.126397	8.2252	0.00303432
Ldlr	-0.125941	8.519	0.0122545
Ppapdc1	-0.12556	8.78054	0.010944
Nupl1	-0.125554	9.16387	0.00143246
Gnb5	-0.125118	8.27533	0.00535321
Hipk2	-0.125116	8.11371	0.00220259
Ephb2	-0.12474	8.12094	0.000144668
Scarf1	-0.124588	8.05667	0.0257273
BC003324	-0.124461	8.38945	0.0010845
Zc3h14	-0.124393	10.1366	0.0382801
Aifm1	-0.124368	8.49821	0.0356197
A630005A06Rik	-0.124345	8.48765	0.020048
Stx18	-0.12426	8.85528	0.0343368
Ap1s1	-0.124181	8.96708	0.02697
B230331O10Rik	-0.123669	8.06165	0.0113943
BC004012	-0.123637	11.5228	0.048511
B230205C01Rik	-0.123411	8.7914	0.0152754
Reprimo	-0.123261	8.21663	0.0491567
G431001E03Rik	-0.122727	8.02878	0.0118241
Atp8a1	-0.12254	8.154	0.000205215
4732418C07Rik	-0.122456	8.9723	0.00323765
Mmp17	-0.1223	8.56789	0.0234987
Robo4	-0.121805	8.05009	0.0013759
A730062O07Rik	-0.121762	8.08224	0.0021737
Nup98	-0.121345	9.01344	0.00987532
Eya3	-0.121064	8.6651	0.0280673
A130020K16Rik	-0.120549	8.14046	0.0169727
Josd3	-0.120458	10.2506	0.0491567
NfiB	-0.120399	8.20695	0.00567624
Ftsj	-0.120322	8.24195	0.011181
Capn2	-0.120278	8.46309	0.0350388
Mobp	-0.120139	8.13972	0.0331961
9530058B02Rik	-0.120054	8.64675	0.0381137
LOC382236	-0.120035	8.19241	0.0491924
Nde1	-0.119909	10.4833	0.00642087
Plcb3	-0.119847	9.06513	0.0239732
Traf6	-0.119616	8.38812	0.0013233
Id2	-0.119521	8.11561	0.00773745
1110008J03Rik	-0.119425	8.43029	0.00220816
Nr1d1	-0.119284	8.11743	0.00131709
D330027H18Rik	-0.118978	8.26905	0.00898012
Gorasp2	-0.118969	10.206	0.0304357
1700016A15Rik	-0.118662	10.5435	0.0296134
Rabl2a	-0.11848	9.42606	0.0162875
Ccrk	-0.118014	8.49876	0.00279027
Fdxr	-0.117819	8.4437	0.00767781
B230384C22Rik	-0.117773	8.75766	0.0370401
Btg4	-0.117761	8.31534	0.0124292
C1qtnf4	-0.117726	8.28625	0.0434145
Fzd3	-0.11723	8.14631	0.0130731
Pfdn5	-0.117204	12.4659	0.0342528
Villp	-0.117068	8.05328	0.016035
Mscp	-0.116635	8.61157	0.00624929
Plxdc1	-0.116374	8.31205	0.0149245
4930503L19Rik	-0.116371	8.13058	0.0115499
Atm	-0.116221	8.65806	0.00512719
Psmd2	-0.116113	10.4342	0.0204386
Slc4a8	-0.11607	8.26257	0.022872
Usp52	-0.115866	9.83698	0.0062365
Zfp236	-0.115316	8.64978	0.0331519
Hr	-0.115075	8.2014	0.0124719
D630040I23Rik	-0.114966	8.06896	0.0196801
Khdrbs3	-0.114955	8.53766	0.0414715
5730590G19Rik	-0.114753	8.1614	0.00537607
9130604K18Rik	-0.114716	8.15626	0.0227699
Brd9	-0.114647	9.77616	0.00886882
2610036C07Rik	-0.11443	8.74776	0.0378788
Gss	-0.113814	8.13718	0.00141923
C330001K17Rik	-0.11376	8.0421	8.86117e-05
Fgf1	-0.113567	8.02659	0.00268491
Gm1805	-0.113141	8.18856	0.02697
Scrn2	-0.113113	8.26113	0.0247185
Dnmbp	-0.113074	8.29031	0.0369232
4732474A20Rik	-0.112883	8.13519	0.0331235
D230007K08Rik	-0.112877	8.14141	0.0294791
Cndp2	-0.112711	8.18193	0.0156373
1700088E04Rik	-0.112696	8.24359	0.0336295
Vldlr	-0.112575	8.80152	0.0472224
Dhcr24	-0.112537	9.61278	0.00973742
C130045I22Rik	-0.112475	8.29825	0.0149534
Tdpoz5	-0.111991	8.08305	0.0485548
Tmc7	-0.111978	8.5214	0.0407245
Cdk2	-0.111775	10.9533	0.0401273
Polg2	-0.111758	8.81973	0.031678
Ap4m1	-0.111379	8.46615	0.00961913
9330186A19Rik	-0.111365	8.33553	0.0494371
Tulp3	-0.111259	8.40422	0.0160047
1700021O21Rik	-0.111225	8.03454	0.00973742
C630024B01Rik	-0.110441	8.03919	0.0380358
Spire2	-0.11043	8.3424	0.0352313
BC052360	-0.110192	8.37595	0.00524463
Dmn	-0.110162	8.30968	0.00923771
3200002M19Rik	-0.109588	8.9063	0.0432364
6030448M23Rik	-0.109575	8.45435	0.0380358
C330029I24Rik	-0.109486	8.06967	0.0152888
A530030B07Rik	-0.109443	8.22013	0.0278152
2610528C06Rik	-0.109321	10.0221	0.0259709
Ppp2r5d	-0.109261	9.68816	0.0138509
4432405B04Rik	-0.10908	8.46606	0.0327143
Golgb1	-0.108839	8.70101	0.0304175
1110030H02Rik	-0.10877	8.15134	0.04157
Foxp4	-0.108655	8.06547	0.0199504
C230096K16Rik	-0.108225	8.29531	0.0434814
4832410F06Rik	-0.107923	8.2221	0.047232
9530082I15Rik	-0.107598	8.20974	0.0258532
1810007P19Rik	-0.107544	8.14666	0.00529988
LOC384934	-0.107404	8.11273	0.0443248
Sh3bp1	-0.107245	7.99913	0.0216955
LOC382737	-0.107227	8.40226	0.00973467
Rassf4	-0.107216	8.03758	0.000765621
Wars	-0.107203	9.8885	0.0192633
Bid3	-0.106733	8.05611	0.0125108
2310040B03Rik	-0.105975	8.33066	0.0273367
5730408I21Rik	-0.105607	8.36009	0.0315548
Snap23	-0.105123	9.87588	0.0477461
Tbc1d2	-0.104937	8.28984	0.0226237
LOC383584	-0.104781	8.12398	0.0181849
Ptges	-0.104689	8.01725	0.0351554
Psmb7	-0.104443	12.9369	0.0179967
BC051244	-0.104043	8.05243	0.0240426
D030068L24Rik	-0.104012	8.44633	0.0369202
Mtrf1	-0.103687	8.81883	0.0350868
Glce	-0.10356	8.57554	0.0252507
4930431B11Rik	-0.103542	8.31724	0.0400239
Fbxw7	-0.103525	8.95414	0.0159237
2300004C15Rik	-0.1033	9.41841	0.044445
Cabp4	-0.103216	8.00827	0.00591148
BC023829	-0.103017	8.12858	0.0350868
Krt1-12	-0.102836	8.0304	0.00298142
Anks3	-0.102111	8.7741	0.0283084
Frat1	-0.101808	8.04067	0.00381856
Map2k6	-0.101739	8.2589	0.00538398
Katnb1	-0.101584	8.48371	0.0100514
C1galt1	-0.101541	8.28859	0.0133303
Ppm2c	-0.101061	8.32772	0.0259264
BC018507	-0.100708	8.63746	0.0030003
Keap1	-0.100649	9.43166	0.0176119
Hist1h2ah	-0.0999022	14.4478	0.046148
Gusb	-0.099834	9.16173	0.033313
D130071N09	-0.0995433	8.11687	0.00500138
Pex6	-0.0992745	9.49593	0.0284459
Tusc1	-0.0988317	8.13316	0.00677864
A330079A07Rik	-0.0987973	8.13302	0.0073668
Mcf2l	-0.0984899	8.43976	0.030504
B230112P13Rik	-0.0980749	8.05176	0.0460589
Map3k7ip1	-0.0979596	9.11601	0.0353174
Ifit2	-0.0975812	7.97868	0.00535388
Lrrc29	-0.0975139	8.1666	0.0235677
Pkmyt1	-0.0971985	8.25365	0.0395557
1300010F03Rik	-0.0971948	8.32878	0.00323527
Lip1	-0.0967396	8.07588	0.017762
Cd6	-0.0964383	7.98533	0.00266305
Dlgap4	-0.095266	8.36276	0.00655676
4833444G19Rik	-0.095137	8.12088	0.0167977
Tbc1d5	-0.0949902	8.30897	0.0141579
Tfpt	-0.094793	9.13192	0.0448122
Dclre1c	-0.0947839	8.14968	0.00824546
Eif3s4	-0.0947196	14.2216	0.0405372
B930036M14Rik	-0.0943234	8.11663	0.0349105
Gulo	-0.0941555	8.08746	0.0444297
Siat7d	-0.0938794	8.05719	0.00119842
A830094I09Rik	-0.0937075	8.0842	0.033586
LOC381250	-0.0928363	8.02448	0.0385661
Fxyd4	-0.0924182	7.98636	0.00969131
Gpr137b	-0.0912053	8.23312	0.0419939
5830461H18Rik	-0.0910195	8.3435	0.0227505
Nudt12	-0.0904938	8.13367	0.0292915
LOC384136	-0.0901558	8.09056	0.0337993
Tmub1	-0.0898561	8.2798	0.00825191
Dleu7	-0.0897168	7.98818	0.0134657
BC027231	-0.0895837	9.20911	0.0484762
scl0002069.1_48	-0.0895369	8.01211	0.043493
Tagap	-0.0889033	9.16512	0.0303831
Irak1	-0.0883763	8.61113	0.0350868
Aof1	-0.0883059	8.34367	0.0113603
Vti1a	-0.0880974	8.49856	0.0406423
Tcf7	-0.0880523	8.16755	0.0216955
E230024F20Rik	-0.0874591	8.08272	0.0356093
Akt2	-0.0868963	8.12892	0.0152364
Recql4	-0.0866828	8.73603	0.0491937
4933433P14Rik	-0.0864366	8.34675	0.0209013
Nln	-0.0863926	9.13017	0.0380608
Cutl2	-0.0863415	8.05952	0.00960465
Lrrc20	-0.0863226	8.21257	0.0491515
Vwa2	-0.0863102	8.03155	0.0122308
Prcc	-0.0861932	8.37785	0.0421049
Tirap	-0.0854365	8.2639	0.028213
Dnalc1	-0.0847861	8.13501	0.0446909
Rasl2-9	-0.0841976	8.04386	0.0405177
Pex7	-0.0840207	8.62721	0.0474849
6720422M22Rik	-0.083684	8.04322	0.0420285
Ilvbl	-0.0828457	8.62691	0.0361877
2510002A14Rik	-0.0809413	8.08808	0.0387232
Idb4	-0.0805207	7.98134	0.0101653
4933440H19Rik	-0.0793966	8.19457	0.0283084
E130115E03Rik	-0.0792546	8.01177	0.0202328
Wdr4	-0.0786927	8.33944	0.0267975
Cdc25b	-0.0782497	8.06608	0.0152282
0610037B23Rik	-0.0778315	8.07214	0.0397968
Dgkk	-0.0776543	7.94019	0.0084569
Ikbkb	-0.0761247	8.12088	0.0403267
scl0002387.1_74	-0.0758587	8.11865	0.0378953
Pik3cd	-0.0757958	8.10985	0.0202725
Rbm14	-0.0753854	8.27549	0.0485548
C130090K23Rik	-0.0746996	8.00255	0.0348177
Acsl6	-0.0737228	8.15459	0.036769
Itga6	-0.073707	8.21531	0.0101494
Fgd5	-0.0737054	8.05916	0.0213967
Trex1	-0.0736489	8.25304	0.0355969
1700011I11Rik	-0.0732113	8.89671	0.0333661
Tbc1d16	-0.0704878	8.00274	0.0235054
Tcf20	-0.0693365	8.36871	0.0282199
Mmp24	-0.0692708	8.09779	0.00718538
Zfp398	-0.066932	8.10612	0.0377513
Kif13b	-0.0669129	8.18037	0.0479648
Kns2	-0.0656314	9.02106	0.0438203
Dpp6	-0.0655561	8.00829	0.043578
2010305C02Rik	-0.064923	8.03011	0.0414475
Arhgap8	-0.0634958	8.09664	0.0392311
BC051083	-0.0592452	7.98761	0.0402726
Myocd	-0.0512598	7.97002	0.0439802
Slc22a13	0.0595336	8.01826	0.0380358
Cyp3a13	0.0619232	7.98653	0.0348355
Spnb2	0.0648583	8.34831	0.0193862
Sema6a	0.066231	8.03324	0.0226663
D430034D15Rik	0.0675306	8.05815	0.0369232
A430075F05Rik	0.0680004	7.97131	0.0451377
Lemd1	0.0698363	7.96051	0.0270373
C030003D03Rik	0.070003	7.99659	0.0234664
LOC386063	0.0714839	7.92166	0.0453999
4930428J16Rik	0.0728318	8.19315	0.0187735
Rasgrp4	0.0738163	8.16587	0.0351192
LOC384200	0.0741379	7.96708	0.0424754
2410017P09Rik	0.075356	8.14969	0.0421303
4930565A21Rik	0.0754435	7.9775	0.0178123
LOC270579	0.075683	8.16143	0.0324764
4933435E02Rik	0.0763992	8.03057	0.0387609
Ephb4	0.0774534	8.98518	0.039904
B020031M17Rik	0.0775562	7.92404	0.044445
LOC236311	0.0777928	7.98127	0.0483114
LOC385084	0.078192	8.07402	0.039904
9430023B20Rik	0.0793801	8.04969	0.0348989
5031400M07Rik	0.0799067	8.55335	0.0305483
Falz	0.0805039	8.14227	0.0271601
Mtcp1	0.0813123	8.02133	0.0350388
A430103M24Rik	0.0818144	7.99274	0.0227425
D230050J18Rik	0.0820635	8.09359	0.0252403
2210418H06Rik	0.0822747	8.38667	0.0436128
LOC328832	0.083021	7.97969	0.00311886
LOC384549	0.0831957	7.97356	0.0250545
Birc1e	0.0833021	7.94253	0.00683529
Cd28	0.0833215	7.94522	0.0041349
LOC381625	0.0839061	7.99212	0.0361977
Synpo2l	0.0841027	7.99358	0.0228524
C1qdc1	0.0842759	8.42962	0.0331765
Ctps2	0.0846195	8.53458	0.0369232
Wnt8a	0.0850108	7.9994	0.0227157
Zfp26	0.0855645	8.08723	0.00170562
Zfp30	0.0857519	8.26972	0.0241547
D530006B18Rik	0.0857948	8.16286	0.00901203
Mgll	0.0859808	7.99849	0.00663362
Chmp7	0.0861451	9.57848	0.0122092
Ube2n	0.0869332	8.64089	0.0345276
Hist2h2aa1	0.0876501	8.17853	0.044606
Rab19	0.0877801	7.99492	0.0187735
2310039E09Rik	0.0896306	8.06361	0.044367
Myrip	0.0896679	8.01409	0.0121749
9830123K24Rik	0.0897475	8.08381	0.0110876
Heph	0.0897686	8.07545	0.0216258
LOC381224	0.0903348	8.06575	0.0400832
Upk3b	0.0911397	8.08821	0.0473358
Rtn4	0.0916894	8.38236	0.0199475
AI317395	0.091742	8.05109	0.0187192
1110019N10Rik	0.0917434	9.74028	0.0439802
Nespas	0.0925629	8.15228	0.0438455
B430119L13Rik	0.092618	7.99925	0.0468884
Numb	0.0926907	8.69397	0.0370401
D030047M17Rik	0.0931728	8.04504	0.0375706
Cdk6	0.0932242	8.11281	0.0491958
Slc11a2	0.0932391	8.50031	0.0111309
4933406L09Rik	0.0934837	8.05379	0.0034623
4631416I11Rik	0.093725	8.05936	0.0160219
Mrgpra2	0.0938082	8.12178	0.0131045
LOC381682	0.0942733	8.0618	0.0397538
Surf6	0.0943655	8.18336	0.00963954
Syncrip	0.0945946	10.1076	0.0144268
Asb9	0.0946221	8.01784	0.0191337
Stim1	0.0947135	8.21442	0.0465682
Suv39h1	0.0950424	8.25317	0.0108695
Ubce7ip1	0.0956191	8.25548	0.0109417
2410187C16Rik	0.0960179	8.67026	0.0366674
D13Ertd608e	0.0960496	7.98293	0.030376
Sncg	0.0962576	8.17977	0.0186669
LOC219215	0.0963685	8.23394	0.0413034
Zzz3	0.0964603	8.31853	0.00522194
Maml1	0.0968151	8.27159	0.0493283
Zfp27	0.0976758	8.72111	0.0366999
AA792892	0.0978149	8.06465	0.0242074
4933417E08Rik	0.0980619	8.14904	0.0204575
C330019M07Rik	0.098142	8.21716	0.0260159
Cgref1	0.0982241	8.08024	0.0412586
Tln1	0.0982467	8.1592	0.0122989
Slc12a9	0.0983978	8.18899	0.013435
LOC384028	0.098704	7.95196	0.0366513
A930007B11Rik	0.0996031	8.03413	0.0447368
Pmpcb	0.0996505	8.20943	0.0430535
C030003M13Rik	0.100625	8.27963	0.0494371
Tmem9b	0.100649	8.75303	0.0235856
AF322649	0.100708	8.2973	0.0287686
Rap2c	0.101036	9.2227	0.0326184
LOC230592	0.101316	8.13297	0.0325265
Erp29	0.101366	12.5585	0.0456669
Ulk2	0.101529	8.19813	0.00743822
Cd200	0.101869	7.91003	0.0100663
scl0003799.1_2	0.102749	8.01082	0.0137058
Zfp275	0.103424	8.55605	0.0142408
Mark3	0.103729	9.50319	0.0121677
2010001M06Rik	0.10393	8.29256	0.0223901
Fbxl18	0.104209	8.34168	0.0290122
BC018399	0.104273	8.09304	0.0435345
C330050A14Rik	0.104401	8.25056	0.0438203
LOC386468	0.104519	8.11509	0.035448
2900055J20Rik	0.104715	8.01983	0.027749
Rabep1	0.104776	8.5597	0.00724951
Brf2	0.104816	9.79068	0.0244994
Fzd8	0.105843	8.01593	0.0102971
Pxdn	0.107148	8.1413	0.0418133
Med6	0.107904	11.1558	0.0405727
H2-T23	0.108148	8.58057	0.047232
Cdkl5	0.108273	8.26687	0.0448122
Epb4.1l2	0.108501	9.36134	0.0467885
A630034I12Rik	0.108916	8.58737	0.0063806
[truncated: 1,456 more rows]

## Sheet: Setdb1 microarray DAY 4 p<0.05
GENE SYMBOL	logFC	AveExpr	adj.P.Val
Gpx2	-2.98774	10.4822	1.02056e-05
Krt42	-2.85533	10.4768	2.99444e-14
Lrrc34	-2.83057	11.5816	2.19536e-18
Trh	-2.53644	11.8596	9.58418e-11
2410039E07Rik	-2.39345	9.81528	6.34322e-14
Laptm5	-2.28839	11.705	4.12198e-12
Myo1f	-2.18255	9.57607	2.42276e-09
2210415K03Rik	-2.12679	9.81596	3.62099e-11
Gjb3	-2.09018	11.3132	1.99185e-16
Tcfcp2l1	-1.98404	11.9889	5.37202e-07
Nanog	-1.94887	11.7211	8.97867e-14
2410004A20Rik	-1.88815	9.78782	1.96572e-09
Kdelr3	-1.87238	10.2993	5.66558e-11
Lama1	-1.86996	9.59284	2.7494e-12
Myl4	-1.86764	9.29973	1.11575e-14
Serpinb6c	-1.83635	9.62337	1.91327e-09
1190002H23Rik	-1.79108	9.98159	2.74745e-10
Krt1-17	-1.68851	9.32214	1.79468e-07
Tcl1	-1.67634	9.46459	4.92122e-14
Gfpt2	-1.62424	10.406	1.11419e-16
Sfrp1	-1.60789	9.29179	1.56717e-10
Klf4	-1.60746	9.51192	1.02784e-14
Gli2	-1.59146	9.45141	0.000299417
LOC381140	-1.56155	10.104	1.11175e-07
Ifitm1	-1.54666	11.9543	3.62569e-09
Capn5	-1.52524	10.7466	3.45729e-14
Inhbb	-1.49572	8.91847	2.8273e-05
Esrrb	-1.47652	12.8735	4.63451e-14
Bhlhb2	-1.47439	9.88671	3.63061e-08
Phlda2	-1.43832	11.6265	2.60545e-13
Gna14	-1.40413	9.08542	0.000343776
Cobl	-1.40362	9.00547	1.27231e-18
Ifitm3	-1.40249	13.4395	8.35156e-13
Itpk1	-1.38367	11.1046	2.24553e-11
Sgk	-1.37594	13.5445	2.94426e-05
Pace4	-1.35301	9.76296	7.4879e-13
Plac8	-1.32276	9.23068	0.00527208
AI427138	-1.31132	11.78	1.15549e-05
Acas2l	-1.29497	9.78588	1.09626e-11
Crtac1	-1.21947	8.83879	7.44143e-09
2610033C09Rik	-1.18745	12.4787	1.1602e-13
Tsga2	-1.18238	9.60509	2.32246e-14
Cd9	-1.17389	11.8244	1.5923e-12
Nxn	-1.17263	11.2667	0.00018585
Scd1	-1.15938	9.77413	9.98665e-10
Msc	-1.15576	9.29694	1.65027e-05
8430410A17Rik	-1.11938	10.2705	4.60444e-07
Pgc	-1.11433	8.92745	9.55139e-16
2001-09-01	-1.1105	9.65745	9.07936e-07
AW046396	-1.1066	9.87489	1.05601e-07
Igfbp2	-1.10377	11.978	0.000251089
Mfge8	-1.09408	12.6714	9.86103e-12
Fgf17	-1.09262	8.75232	3.75667e-17
Pdgfa	-1.08842	11.7853	6.76012e-12
Etv4	-1.07669	10.3476	8.71867e-08
Tbx3	-1.072	9.34087	0.000123891
Ckb	-1.06845	14.06	8.13547e-11
F830002E14Rik	-1.04397	8.63891	0.00125857
1110001N06Rik	-1.04062	10.632	4.6755e-11
Alpk3	-1.04024	9.04849	2.55299e-08
Tcf15	-1.0384	9.79713	3.45725e-06
Fxyd6	-1.03261	11.2689	7.68843e-10
Cplx1	-1.0319	8.85035	6.49959e-09
Ass1	-1.0168	10.8996	6.94732e-08
Mybl2	-1.01504	11.4296	2.96181e-13
Gbx2	-1.01333	11.4799	0.00191732
Kit	-1.01272	9.26058	5.12954e-08
Pcyt1b	-1.0059	9.83084	4.56934e-09
Dnajc6	-0.999691	9.56144	0.000173552
Ifitm2	-0.994583	13.4427	6.57031e-11
2900078C09Rik	-0.99283	8.84304	3.77218e-08
D6Wsu176e	-0.983961	10.6298	1.7779e-12
Vegfc	-0.982922	9.03631	2.79987e-10
Mreg	-0.978049	11.7187	1.07635e-06
Socs3	-0.975169	11.6974	3.05134e-07
A130092J06Rik	-0.972606	9.00931	2.08961e-05
D16Ertd472e	-0.963819	9.83417	2.36296e-10
Nupr1	-0.960657	11.5401	1.24012e-07
Mylpf	-0.954962	11.4588	3.26571e-08
Tbc1d13	-0.952567	11.9263	4.03445e-06
Olig1	-0.947854	11.6448	2.90168e-09
Porcn	-0.947479	9.64836	7.96925e-14
Ivns1abp	-0.942179	10.4982	0.000821884
Nptx2	-0.941504	9.83814	9.89805e-06
Gababrbp	-0.940485	9.57204	3.04031e-10
9130417I07Rik	-0.936847	8.54293	1.57089e-05
D11Ertd759e	-0.936416	9.53011	6.10404e-10
Eppk1	-0.931676	9.17169	7.42658e-06
Pga5	-0.930144	8.72385	0.00242734
Cxxc6	-0.929133	12.4389	5.24606e-11
Cdo1	-0.926028	8.95851	2.16579e-10
Slc6a6	-0.924659	11.3789	3.02678e-10
Ets2	-0.914493	9.8002	3.38949e-09
Tnfsf13	-0.914055	9.76961	3.73802e-11
Setdb1	-0.906153	9.14036	8.66564e-15
D14Ertd668e	-0.899482	9.62377	2.29811e-07
Tubb2b	-0.891932	11.9567	1.87446e-11
Slc29a1	-0.88882	10.4558	1.3465e-12
Apobec3	-0.887409	9.27019	3.19704e-14
Anp32a	-0.884396	10.2778	2.48824e-12
Rab27a	-0.88133	10.4256	3.46962e-10
1700037H04Rik	-0.876597	12.2185	2.2343e-09
Frat2	-0.876351	9.23272	1.05705e-13
Oat	-0.865914	10.7182	7.41376e-05
H2afy	-0.863524	11.8992	1.27037e-10
Fgf4	-0.858305	9.77379	2.77197e-09
2210409E12Rik	-0.854553	10.3407	0.000786296
Ccnd3	-0.851561	11.0482	2.07082e-08
D130083G05Rik	-0.848426	10.812	7.63329e-06
5430425C04Rik	-0.845149	9.34493	1.48753e-05
Mtap7	-0.844121	9.99773	1.93022e-09
Ccnd1	-0.842785	11.4917	3.65418e-11
Ldh2	-0.84241	12.5333	8.57943e-07
Tgm2	-0.834417	8.60098	2.76668e-08
Sirt3	-0.833498	9.8756	4.09395e-11
Zfp57	-0.82953	10.1064	5.21351e-06
LOC383491	-0.828612	8.47184	3.01449e-07
2310005L22Rik	-0.828551	11.0493	4.57759e-07
Ly6g6e	-0.827323	9.24878	1.23952e-10
Stmn2	-0.824193	11.6398	8.78942e-07
9630046K23Rik	-0.82391	11.6979	3.45836e-08
Ulk1	-0.818845	10.2041	2.09386e-12
A130038J17Rik	-0.81631	8.82403	1.38092e-06
3100002J23Rik	-0.814535	9.00147	2.41394e-05
E130014J05Rik	-0.809815	9.35013	1.80092e-12
Mapt	-0.802148	8.74125	0.000101886
Inpp5d	-0.800584	8.82921	0.000317668
1700007J06Rik	-0.800551	8.55365	1.1624e-09
Idh2	-0.799227	9.75197	4.58727e-07
C330005L02Rik	-0.798506	10.1182	4.37611e-10
Camta1	-0.794256	9.99368	3.59398e-09
C330008K14Rik	-0.79355	9.51862	2.367e-10
Ppargc1b	-0.793541	9.2258	1.55631e-09
Pcolce	-0.792747	9.9007	1.67653e-05
Gcnt2	-0.79151	9.78253	2.20671e-14
Shmt1	-0.79085	10.3702	1.80118e-13
Ppap2a	-0.78998	9.27321	7.62082e-08
Igf2bp2	-0.787746	12.0377	0.000216653
2410137M14Rik	-0.784342	8.86287	5.11158e-09
Camk2n1	-0.78272	9.14187	9.63421e-09
1810006K23Rik	-0.782208	8.88058	4.10497e-13
Cotl1	-0.779569	9.80557	8.30665e-05
LOC381105	-0.778473	8.42757	1.50338e-12
Cdc5l	-0.778174	11.8453	2.54678e-12
Gstm1	-0.777861	9.165	3.41972e-05
Ebaf	-0.772426	10.5658	5.44579e-06
Trf	-0.766763	8.79249	0.000404295
Erdr1	-0.76417	12.6233	0.0320161
LOC243823	-0.763939	8.6885	0.000386164
AI850995	-0.76208	9.23687	0.000225763
Elf3	-0.757421	8.88748	0.000195322
Aard	-0.756167	10.4285	1.45314e-08
Plekhh1	-0.756	10.2872	3.65954e-07
LOC381889	-0.75432	10.5871	1.0471e-09
Zfhx2	-0.753116	9.9531	0.000446004
BC032203	-0.752104	11.7265	2.304e-08
Cd68	-0.748142	9.4275	3.01076e-09
2310046K01Rik	-0.745254	8.72643	3.36291e-09
Ak2	-0.744231	10.9227	1.17606e-09
Myst4	-0.741921	10.025	2.03837e-07
2200001I15Rik	-0.741791	9.11579	0.000152231
Tdh	-0.740847	9.67819	1.28387e-05
AA467197	-0.74002	9.54421	1.97155e-09
2009-09-01	-0.739694	9.26832	4.76763e-08
1110020C13Rik	-0.739237	11.3656	3.4414e-10
Hap1	-0.738584	9.02335	1.39845e-15
LOC239102	-0.738559	9.67879	0.000143051
LOC381269	-0.732709	9.69638	4.63383e-06
2410146L05Rik	-0.7295	13.6366	5.36347e-08
Ssbp4	-0.722782	10.2372	3.75215e-08
Cds1	-0.722333	9.73774	1.70644e-05
LOC235857	-0.722261	10.2896	2.91754e-07
S100a13	-0.719706	8.88962	2.11132e-06
Ndrl	-0.718894	8.96743	1.48516e-09
Gm1631	-0.716293	8.56123	2.62273e-05
Sorl1	-0.71522	8.58607	1.04628e-13
LOC208080	-0.714824	10.5114	8.27181e-09
Hal	-0.71466	8.62836	0.0097496
Tcfap2c	-0.713087	11.401	1.11506e-09
Fblim1	-0.7105	12.2316	0.00636544
Tgfb1i4	-0.709401	10.3572	4.2841e-07
Csrp2	-0.707001	13.3996	3.33069e-06
Fstl1	-0.702167	9.34305	0.0019033
Sh3gl2	-0.70199	9.85699	0.00160963
Map4k1	-0.700218	10.0634	5.90764e-05
Mras	-0.699464	8.42763	1.00834e-11
Dpp4	-0.696866	8.85411	0.0455343
Nr5a2	-0.694637	8.71494	0.00202704
S100a1	-0.694089	8.72756	0.000167689
Galnt11	-0.69311	9.43449	2.81819e-12
Rfx2	-0.691887	10.8221	3.88492e-07
2310007G05Rik	-0.691077	10.1515	6.50671e-09
Atp1b1	-0.690145	10.9866	4.3844e-08
2700038C09Rik	-0.689691	10.1814	6.04514e-08
Osgep	-0.689268	11.6192	7.47805e-07
Bcl3	-0.683969	8.94635	2.86559e-08
Dpysl3	-0.68352	9.17975	9.71717e-11
Arih2	-0.683109	11.667	1.98247e-09
Akp2	-0.681456	10.122	1.04926e-08
9130422H11Rik	-0.680938	9.09319	2.78756e-08
Slc25a39	-0.677582	10.3212	6.81123e-10
Txnip	-0.677522	12.238	1.56761e-11
Tagln2	-0.676996	11.5545	0.00327051
Npn3	-0.676965	9.38681	1.77641e-13
Mov10	-0.674994	8.92141	1.04403e-09
Tnip1	-0.674411	9.07336	2.68025e-13
Parp1	-0.671397	12.6603	0.000230879
Cpe	-0.671047	8.57052	6.18403e-10
Fabp3	-0.665337	13.1371	1.47649e-06
Senp3	-0.665296	12.8368	4.57357e-06
BC038156	-0.664785	9.50772	3.57608e-10
Ubd	-0.664456	9.00054	2.2044e-05
D15Ertd366e	-0.66209	10.1843	3.26571e-08
Spink3	-0.659789	8.6183	2.1194e-10
2210011C24Rik	-0.65794	8.66163	6.20825e-08
Ndg2	-0.657398	14.7111	2.43098e-09
LOC226017	-0.65595	10.1706	4.27147e-06
C130033B18Rik	-0.655567	10.0942	0.00285315
St5	-0.654336	10.3319	0.00206174
Gpt2	-0.653047	9.96945	3.79929e-07
2310009N05Rik	-0.651813	8.88708	0.0153313
Notch4	-0.651691	8.7539	1.10089e-08
5730438N18Rik	-0.650672	10.3911	2.51192e-10
Pald	-0.648908	11.1372	6.16681e-06
Dtr	-0.648043	8.78805	1.52877e-07
Dbi	-0.647669	12.6268	0.0324351
Tubg1	-0.647635	9.80794	2.06113e-09
Sparc	-0.647292	10.1362	0.00293366
Gm691	-0.6453	8.68797	3.45504e-05
Dhrs6	-0.64302	9.30398	1.11771e-08
Spats1	-0.641883	9.13229	9.26238e-06
LOC634428	-0.638491	8.54013	1.57447e-06
Aim1l	-0.637619	9.52137	2.92617e-10
5930412E23Rik	-0.63713	10.5848	0.024923
Ppap2b	-0.634542	9.42912	4.06061e-07
Sox2	-0.633927	10.534	1.07547e-09
LOC231663	-0.631557	8.81127	0.000106025
Gstm2	-0.631179	10.8262	0.0449968
2900019M05Rik	-0.630784	8.76064	2.75222e-11
Aes	-0.629966	9.15727	2.12827e-05
2210013O21Rik	-0.62865	11.3265	6.83074e-06
Ccdc53	-0.627964	10.1088	2.04245e-10
Lamc1	-0.626198	10.558	0.00158009
Itpr1	-0.625362	10.4245	1.94541e-10
E230002P03Rik	-0.625176	8.42648	3.13527e-09
1110036I07Rik	-0.625043	10.2621	1.79881e-05
Egln3	-0.624105	8.81009	2.58484e-10
Aoah	-0.62091	8.87308	0.00019249
A630086H07Rik	-0.620163	9.58439	3.15419e-08
Pgam5	-0.619554	10.6748	4.54165e-06
1700019N12Rik	-0.619544	9.2591	8.11972e-09
Gsto1	-0.618329	11.1283	2.65278e-05
Csnk1e	-0.614369	11.3049	1.47333e-09
Rrm2	-0.614211	9.93348	2.40243e-09
Hrb	-0.613367	10.9927	0.00992577
6030495B01Rik	-0.612645	8.66366	0.0141396
Pde1b	-0.610017	9.73955	1.20914e-06
Galnt2	-0.609947	10.1117	1.2283e-07
Htra1	-0.60979	8.87529	8.65008e-06
2610207P08Rik	-0.609763	11.2734	6.13502e-11
Sfxn1	-0.609586	12.6317	9.71442e-11
Hspb8	-0.609101	10.6532	3.75861e-07
Snag1	-0.607606	11.2061	7.21355e-08
Fkbp5	-0.606814	10.4777	6.82642e-11
D130058I21Rik	-0.606597	9.93406	0.00012229
Lrig3	-0.606358	10.2916	4.2401e-05
1190003J15Rik	-0.605098	10.7351	6.52716e-06
1110003E01Rik	-0.60452	10.694	8.88775e-07
Epb4.9	-0.602911	8.61136	5.23074e-12
Ebp	-0.602133	9.13091	5.55325e-08
Ier3	-0.599652	10.7182	0.00219548
1200013B22Rik	-0.597834	9.43453	0.0159263
D430028G21Rik	-0.597752	9.08526	9.05554e-07
9930116P15Rik	-0.596742	11.654	5.49181e-08
Ccs	-0.595932	11.3213	3.58423e-08
Fn1	-0.595836	9.70815	0.0324351
4933405K07Rik	-0.595773	9.40689	2.949e-06
Cdc42ep4	-0.594986	10.1828	0.00419201
Aqp3	-0.592355	8.81437	5.20105e-06
Vwf	-0.591596	8.49445	0.00150332
4732455O04Rik	-0.589528	9.02318	7.79572e-09
Tek	-0.589194	8.46686	2.98175e-10
1810020D17Rik	-0.588228	9.52026	1.27029e-06
Myo5c	-0.58815	8.59558	0.000357212
Calca	-0.587345	9.2729	1.1303e-08
Dyrk3	-0.585524	11.273	0.0496967
Pttg1ip	-0.583961	12.3014	0.000288273
Nfil3	-0.583009	9.43448	6.01327e-10
2410008K03Rik	-0.581531	10.8637	0.03943
Idb2	-0.58122	9.61814	2.01302e-05
A930010I20Rik	-0.579991	9.69192	1.19549e-09
Pitpnc1	-0.579426	8.98627	1.95598e-06
Ppic	-0.579227	11.2868	6.03039e-05
2810441K11Rik	-0.577901	9.5649	2.88677e-05
D130003B22Rik	-0.576238	8.74775	9.15749e-07
Tulp2	-0.573677	9.57937	2.58365e-06
0710007G10Rik	-0.573286	8.87445	0.000734568
Hk2	-0.572358	13.9548	1.29768e-07
Spry4	-0.572092	8.84473	1.12108e-05
Rab7l1	-0.570919	8.57633	0.00234605
Ndrg1	-0.570291	8.71368	6.89609e-07
Dync2li1	-0.569747	9.34629	1.3156e-11
4930538D17Rik	-0.567336	10.5306	3.46479e-06
Neurl	-0.566633	9.30905	5.81751e-06
9330107J05Rik	-0.565056	10.3309	0.00310146
scl0003519.1_175	-0.564641	8.4099	6.4745e-09
Btg1	-0.564348	10.5361	6.6429e-05
LOC545007	-0.563485	9.84977	6.88461e-05
2610036D13Rik	-0.5626	10.0363	1.28566e-06
Nudt4	-0.562253	10.4967	5.65542e-06
Chi3l1	-0.561349	8.30326	0.0211816
Hsd3b7	-0.557671	9.90907	0.00852225
BC037708	-0.55664	10.5736	8.82648e-07
D9Ertd280e	-0.556593	9.29039	4.49035e-08
1110058L19Rik	-0.556547	11.1604	0.00177015
Tgm1	-0.556053	8.72099	9.05554e-07
Hibadh	-0.555705	13.0357	0.0032822
Gm2a	-0.555586	10.4679	8.2716e-06
Sema4a	-0.554889	9.25009	0.000592142
Mrps6	-0.553604	10.1278	5.02829e-07
C330006A16Rik	-0.551958	9.89377	2.31036e-07
Avpi1	-0.551077	10.1949	4.4339e-05
Ostf1	-0.545876	11.1394	0.000336232
Nfatc2ip	-0.542965	9.14765	4.22541e-07
Fah	-0.541808	10.2136	0.0100529
BC013481	-0.541757	9.26995	0.000191699
Eras	-0.540132	11.0262	9.07936e-07
0610012D17Rik	-0.538959	11.1847	1.25332e-08
C230093N12Rik	-0.538829	10.3575	0.0234974
Chrna9	-0.538704	8.85682	3.7843e-07
Jam2	-0.536905	8.36493	1.95406e-13
Brp17	-0.536881	8.70505	2.55893e-07
Usp48	-0.536347	9.94996	1.96992e-11
Chchd4	-0.534021	11.0219	2.14946e-09
Tnfrsf21	-0.533313	8.72136	1.02388e-10
scl0003448.1_536	-0.533266	9.85934	1.91943e-07
Plekhb2	-0.533035	8.78861	0.0497328
Igfbp4	-0.532731	8.75646	1.61719e-08
1110030K22Rik	-0.532675	9.08158	2.49092e-05
Dner	-0.531593	8.45889	0.0001798
Igfals	-0.531139	9.3245	2.27552e-10
D10Ertd214e	-0.529773	9.36564	0.0022016
B830028P19Rik	-0.529326	8.83436	2.95487e-07
AU040950	-0.528652	8.72175	8.21077e-07
Cbr3	-0.528198	10.1556	0.0481368
D15Ertd405e	-0.526176	9.57129	1.83806e-08
Gpr125	-0.525968	11.0138	6.32706e-06
Ldb1	-0.524642	12.7612	4.38022e-09
1190002C06Rik	-0.524451	11.0039	0.00184609
Ift52	-0.523423	11.011	5.73475e-05
Immp2l	-0.52232	9.58315	4.40064e-05
2310022A10Rik	-0.521485	10.1888	1.56247e-10
Grasp	-0.521434	9.07835	2.64451e-09
Arrdc4	-0.520738	12.0785	7.21744e-05
2210008I11Rik	-0.520228	10.9754	7.18218e-05
C730026J16	-0.52014	10.4286	1.83642e-08
1110003P22Rik	-0.519478	10.022	7.32452e-07
Tmem14c	-0.518661	11.2785	1.36131e-09
D030012E24Rik	-0.517712	9.44952	9.2582e-12
6330534C20Rik	-0.51486	9.37612	1.41088e-06
Dhrs1	-0.513196	9.36175	5.52906e-08
LOC229665	-0.512487	8.66978	1.44413e-07
Atic	-0.512239	9.92262	0.00522286
Sfrs14	-0.511111	10.2911	8.78942e-07
Slc39a11	-0.510149	8.99339	6.47443e-08
BC008171	-0.509944	9.2315	2.26227e-07
Dcun1d4	-0.509882	9.07764	5.35196e-06
Itpka	-0.509523	8.69951	0.000368185
Cnn3	-0.508482	10.9447	0.000883531
A930005G04Rik	-0.508435	10.126	5.61513e-07
Sult4a1	-0.507107	11.6034	1.78134e-06
Add3	-0.506736	9.9647	2.36209e-08
BC003277	-0.50667	10.4187	0.00029763
2310047C17Rik	-0.506067	8.54188	3.44992e-08
Arl3	-0.505767	10.1611	5.14245e-10
Pdha1	-0.505394	12.7569	2.09938e-07
Tgif	-0.505183	10.0115	1.27216e-08
AI663987	-0.505084	10.5317	2.1752e-05
Cad	-0.504981	10.4772	5.08805e-07
1700013A01Rik	-0.504776	9.5833	9.61433e-11
Setd6	-0.503386	10.5752	3.65944e-08
Capns1	-0.503366	12.6181	0.00156585
Prep	-0.50318	9.44884	1.8356e-11
scl0002507.1_236	-0.502155	9.60829	3.45078e-06
Arc	-0.501764	8.51962	2.81072e-08
Gtf2f2	-0.501158	12.0708	1.77062e-07
18S_rRNA_X00686_301	-0.499749	13.1363	0.0285487
E2f1	-0.499423	11.351	2.50286e-05
Zadh2	-0.497943	8.54481	2.50321e-07
Gadd45a	-0.495277	11.791	0.000126431
9630048M01Rik	-0.49497	8.66945	3.17669e-05
Ak4	-0.494545	9.81262	0.0008823
Dcbld1	-0.493748	9.54157	1.93672e-05
Unc84a	-0.4937	10.3155	1.02189e-06
Mbnl2	-0.493429	10.1457	6.23254e-05
Bcap29	-0.493093	10.6706	9.91881e-08
Sc4mol	-0.492722	11.2853	2.48221e-07
Rage	-0.492705	8.6747	7.37421e-12
Mrps9	-0.492651	11.1186	0.0418008
Sirt5	-0.492065	8.80882	9.10906e-10
1190017O12Rik	-0.49183	9.78156	8.90117e-05
BC028528	-0.491171	8.53352	1.52404e-07
Akap11	-0.490538	9.35918	5.50973e-07
Sfrs7	-0.487576	11.8759	4.84267e-06
Sod2	-0.487495	12.9122	5.55192e-06
Arl6	-0.48584	10.0515	6.37991e-06
Sox15	-0.485577	8.89669	3.67227e-07
Ruvbl2	-0.483476	12.3044	3.21799e-08
Spc24	-0.482538	9.92441	0.000324427
Slc6a8	-0.479327	10.3408	1.73488e-05
2810417H13Rik	-0.479084	10.1909	0.00235432
Trak1	-0.478302	9.15547	7.82474e-06
Abca7	-0.477788	9.4126	0.0333654
Itgb7	-0.477634	8.75176	6.07992e-06
Vegfa	-0.477376	8.83872	5.93814e-10
G3bp	-0.476545	12.5558	2.20643e-07
Smg7	-0.475562	10.3454	0.0148316
Lin54	-0.474587	11.0672	1.52212e-05
B4galnt4	-0.474435	8.50889	1.49695e-07
2210015K02Rik	-0.474432	8.78911	2.01925e-07
Pak4	-0.473269	10.7152	1.11885e-07
2310079N02Rik	-0.472949	9.74356	9.70158e-05
1700014P03Rik	-0.472294	8.40248	2.74528e-06
1600014C23Rik	-0.471955	8.40933	2.71015e-08
Cryz	-0.471472	8.73721	2.22728e-10
2310041H06Rik	-0.471459	9.32894	0.00019031
0610039J04Rik	-0.470888	11.2384	5.75087e-08
Ankrd35	-0.470854	8.88235	6.6932e-07
Stac2	-0.470514	8.67468	4.60444e-07
Elovl5	-0.470258	12.4252	0.000731221
Crym	-0.469352	8.3878	3.04295e-07
Alg6	-0.469238	9.80566	7.29472e-07
2210410E06Rik	-0.469031	10.3542	0.00648821
LOC381132	-0.467738	8.28039	2.57761e-08
LOC245350	-0.466394	8.59572	8.17886e-07
Gsta4	-0.466361	12.5236	1.02869e-06
Insm1	-0.465854	8.71667	0.00160103
Qdpr	-0.465684	10.42	2.7764e-06
1810027O10Rik	-0.465286	11.9431	7.77835e-08
2310003L22Rik	-0.464088	9.01047	8.40391e-11
Rnpep	-0.463512	10.288	0.00715267
Ctsc	-0.461559	8.44871	5.65681e-09
Lancl1	-0.460101	9.53523	0.00662436
Ppm1k	-0.459926	8.85695	3.7244e-08
Pola2	-0.459492	10.6504	1.22014e-07
C430004E15Rik	-0.458906	10.003	6.1465e-05
Cklfsf6	-0.458804	9.91357	6.14506e-06
8030459N02Rik	-0.458291	11.8095	3.17373e-09
Evc2	-0.456254	9.00666	3.58063e-05
Trps1	-0.455908	8.72326	6.19076e-10
Polh	-0.453013	8.98203	3.56753e-05
Pold2	-0.452244	11.2408	1.28222e-05
Slc25a19	-0.451897	9.57906	2.54121e-08
Fh1	-0.451362	11.0317	0.0302686
1700013L23Rik	-0.451321	8.89116	4.41761e-06
Nrm	-0.449887	11.7981	0.00641565
C330018L13Rik	-0.449117	9.7854	5.39189e-08
Tiam1	-0.448927	9.85786	0.000413831
B930041F14Rik	-0.448666	10.3473	0.00705345
LOC381865	-0.448314	13.2395	4.73873e-06
2610019I03Rik	-0.447842	9.79929	0.000111328
Helb	-0.447609	11.2061	1.07892e-08
LOC382127	-0.446259	12.9945	7.23245e-06
Zfp96	-0.445728	10.4796	3.74967e-06
Mapbpip-pending	-0.445517	10.3846	0.000619424
4632404H22Rik	-0.445104	9.47233	4.6668e-05
1600023A02Rik	-0.445099	12.4012	0.00112017
Rad51c	-0.444792	9.9206	3.32612e-06
Ssr2	-0.443622	12.9243	1.07793e-05
Cdc37l1	-0.442855	9.32921	1.71068e-10
Pla2g1b	-0.442819	12.4293	0.000155872
Sec14l1	-0.442447	8.59093	2.51512e-09
Hdhd1a	-0.440525	8.23152	0.0431413
Lmna	-0.440347	9.83305	4.32754e-07
Gm561	-0.439314	9.81745	5.68421e-05
Ildr1	-0.438584	8.47756	4.83813e-09
1500011H22Rik	-0.438273	10.1955	3.84615e-08
Gaa	-0.437514	9.19637	5.42448e-06
4930519N13Rik	-0.437263	9.34832	0.0177319
Qprt	-0.436082	8.9053	0.0110858
Hhex	-0.435533	8.95598	4.71378e-08
Pdgfc	-0.435516	8.20697	1.76844e-07
Pycr2	-0.43499	12.4754	0.00578603
Tex14	-0.434699	10.4702	8.99665e-05
Tmem23	-0.434119	9.44641	0.000155872
LOC383897	-0.434073	11.0311	4.54233e-07
5830482G23Rik	-0.431817	9.66929	1.93191e-05
Nme7	-0.431602	10.435	0.000342597
Whdc1	-0.430888	9.01051	3.66494e-08
Igsf3	-0.430795	10.1186	2.64098e-06
Klf2	-0.430224	11.5028	3.1967e-07
6720463M24Rik	-0.429151	9.97054	1.41874e-05
Niban	-0.428967	9.10952	3.83014e-07
Bola3	-0.428362	10.6623	0.000109745
St3gal3	-0.428269	9.54436	3.77758e-06
Schip1	-0.428048	9.74521	9.72765e-07
Gpi1	-0.427501	12.0802	1.11765e-07
Fcgrt	-0.427194	8.69638	3.62861e-09
Uck2	-0.426668	12.5394	0.0138735
A430005L14Rik	-0.426076	10.131	1.68027e-06
LOC385492	-0.425244	8.64749	2.43606e-09
Mtch2	-0.424366	11.0351	6.59272e-08
D4Ertd432e	-0.424251	8.80926	3.34047e-06
Chchd6	-0.424087	9.61508	2.85277e-06
2410072D24Rik	-0.423863	9.62768	3.02539e-06
BC038311	-0.423325	10.3307	1.4899e-08
Lzf	-0.422714	9.45187	0.000258035
Rab11fip5	-0.422089	8.75417	6.4788e-06
Pfc	-0.421839	9.46545	3.22146e-05
E130012A19Rik	-0.421558	12.0564	2.56895e-05
Bach2	-0.421298	9.04871	0.0128137
Coasy	-0.421133	10.1539	2.54166e-06
Zfp296	-0.421029	10.0039	1.97446e-06
Acn9	-0.420847	9.34387	6.02456e-08
A230062G08Rik	-0.4201	9.9966	0.00106169
Icam1	-0.419741	10.1239	0.00928945
Hexb	-0.419236	9.10479	8.04447e-06
5730509K17Rik	-0.418668	8.94671	0.00628751
Pdyn	-0.418244	8.32621	2.41201e-08
LOC386529	-0.418211	8.49272	1.62153e-06
5830434P21Rik	-0.417567	11.1526	0.00104516
Dpm3	-0.41741	10.5288	0.000224279
1500001M20Rik	-0.417372	10.7938	7.24318e-08
Nipsnap1	-0.41714	11.2205	0.000104422
Lyplal1	-0.41669	8.59491	9.0278e-05
Stard4	-0.416245	9.00017	0.00203735
Pnp	-0.415659	9.70824	0.000748944
AI256711	-0.41467	8.82075	0.000272408
Bub1b	-0.414474	11.7132	4.92442e-07
Pgm2	-0.414431	12.5905	6.5765e-06
Snx6	-0.414327	10.3472	2.21442e-07
Rbbp5	-0.41346	8.96941	0.0157973
Arhgap17	-0.41318	9.77514	2.52762e-08
BC004728	-0.412994	10.2156	0.00205341
LOC333744	-0.412397	11.1236	0.00453253
LOC383712	-0.411681	12.9081	1.4604e-07
Aldoa	-0.411215	13.8927	0.000366742
Pim3	-0.410834	11.9863	4.5272e-05
Hes1	-0.410517	8.92873	0.0172226
D630036F01Rik	-0.410412	8.68342	8.19751e-06
Mif4gd	-0.410187	10.1138	2.15379e-09
1200007D18Rik	-0.41018	11.2994	0.00229956
LOC269515	-0.410066	10.3142	9.89138e-07
Foxn4	-0.409463	8.34638	9.17658e-05
Trim8	-0.409085	11.7684	0.000915499
5630401D06Rik	-0.409025	10.4379	3.43916e-06
Aplp2	-0.408445	12.4831	0.00030883
LOC383010	-0.408241	9.96357	3.97042e-05
9530018I07Rik	-0.408158	9.25464	3.70074e-05
Zbtb7	-0.408019	9.32834	3.34963e-06
Grit	-0.40737	9.77618	0.000192194
Gnpda1	-0.406948	10.806	5.75737e-07
Tle4	-0.40663	10.9809	0.00028334
Rpap1	-0.406551	9.79343	1.43209e-06
Wdr51b	-0.406427	10.2834	1.78016e-05
Calml4	-0.40621	8.43293	5.18311e-05
Mir16	-0.406029	10.6215	2.37994e-07
C330001N20Rik	-0.405657	12.1976	1.64248e-05
scl0001709.1_980	-0.405616	12.1721	0.000589719
AA517739	-0.405214	8.58099	6.6193e-06
2700049A03Rik	-0.404935	10.0721	1.44206e-07
1110029L17Rik	-0.404876	10.5303	2.09938e-07
Spint1	-0.404631	11.5982	0.00166646
Mrps16	-0.404531	11.053	1.14109e-06
Aldh18a1	-0.404503	10.3827	8.21843e-07
Golph2	-0.40408	10.9533	0.0060262
C230070D10Rik	-0.402988	9.97471	9.29902e-06
Lypla3	-0.402979	10.2276	1.2258e-05
Sh3tc1	-0.402281	8.50875	7.68167e-08
Ttf2	-0.401895	10.661	1.09619e-06
Prps1	-0.401712	11.8427	3.8719e-05
Supt3h	-0.401661	10.8484	2.61559e-06
Plekhf1	-0.401442	8.68697	2.19706e-08
Cmtm7	-0.401056	9.31014	0.0405367
Rpp25	-0.400616	12.1127	0.00134153
2810485I05Rik	-0.400196	11.3966	3.26679e-05
D16Bwg1494e	-0.399965	8.9717	0.0292864
C130091E20	-0.399333	8.51932	0.00852462
A530088H08Rik	-0.399177	8.35337	0.00138194
Atp1b2	-0.398836	8.64217	0.0223639
Ssfa2	-0.398805	9.49165	2.76869e-05
Slc31a1	-0.398641	10.2072	3.16332e-06
1110059F07Rik	-0.398557	9.53563	0.0024882
Blvra	-0.398478	9.69151	4.11942e-06
Vars2l	-0.398416	9.95039	3.47443e-05
LOC382237	-0.398334	8.1234	4.42831e-08
Sdf2l1	-0.397974	9.18962	2.94868e-07
1100001D10Rik	-0.396541	10.1726	2.38644e-05
Hsd17b4	-0.3965	11.5718	0.000333906
Bag1	-0.396455	13.2773	3.5219e-05
Bzw2	-0.396451	12.4504	1.7585e-06
Rangnrf	-0.396083	11.2568	3.09644e-05
5830467J12Rik	-0.396063	8.52076	2.11982e-05
Aco2	-0.395844	11.2895	1.56736e-08
2610020H15Rik	-0.395756	8.64002	4.12354e-06
Ppa1	-0.395542	14.0714	4.1852e-07
Ctsb	-0.395243	10.8725	0.000130993
Cln3	-0.39504	9.33993	8.65533e-05
Slco4a1	-0.394934	8.76202	8.84886e-08
Ankrd28	-0.394121	9.31854	1.28266e-10
Cnih4	-0.39383	12.5036	0.0192477
Nfkb1	-0.39299	9.26828	6.20825e-08
5430400N05Rik	-0.392705	10.4526	0.00299988
Iqgap2	-0.392136	8.97157	0.000120566
Birc7	-0.392106	8.15709	3.47523e-06
2510027N19Rik	-0.39192	11.7179	4.00426e-05
Wsb1	-0.391058	11.6496	0.000706553
Spc25	-0.391024	9.69373	0.000247321
Sall1	-0.390542	9.01485	3.45504e-05
C730029F17Rik	-0.390406	10.1329	2.13274e-05
Gig1	-0.389844	8.53643	9.43305e-08
Mia1	-0.389727	8.86353	0.000990223
LOC228715	-0.38953	9.88512	0.000150195
2010001O09Rik	-0.389127	10.5178	4.36661e-08
Rpain	-0.388905	10.1311	3.87721e-06
Cox18	-0.388617	11.5216	7.93958e-07
2010204K13Rik	-0.388329	9.10074	6.07304e-07
Pdxp	-0.388019	9.98577	1.69798e-05
Gart	-0.387805	12.4395	0.000117762
Cyb561	-0.386188	10.2767	0.000322643
Frrs1	-0.385392	10.2825	1.6015e-06
Narg1l	-0.385378	9.71302	3.75713e-07
Dap3	-0.384314	12.6823	4.05519e-05
LOC207939	-0.383498	8.44927	2.46155e-07
Pltp	-0.382439	9.31579	0.000110926
Ppp2r5c	-0.382304	10.3078	7.83425e-08
9030619K07Rik	-0.381932	9.19221	3.74776e-06
Pdk3	-0.381656	9.87733	0.00023299
Dazap1	-0.380291	11.2646	1.17327e-05
Camk2b	-0.380256	8.93255	0.0127223
2310051F07Rik	-0.38007	10.2237	1.87705e-06
Btbd14a	-0.379935	8.57141	4.22034e-10
Thumpd3	-0.379769	10.6548	2.98712e-05
Tk1	-0.37942	9.37027	1.53851e-06
Ppp1r3c	-0.379006	8.43373	0.0108984
Sdcbp2	-0.3789	8.41795	1.50205e-10
Pank2	-0.378764	10.738	1.57701e-05
Nphp4	-0.378698	8.69422	9.97878e-05
Rrm1	-0.378187	10.4105	2.06469e-05
scl0002975.1_346	-0.377967	9.47023	0.000174818
Keo4	-0.377859	9.07276	1.38771e-07
Vat1	-0.377835	9.49226	4.60263e-05
Tcea2	-0.377293	9.2011	0.00814812
Rusc2	-0.376884	8.8889	4.99855e-05
Lrrc15	-0.376697	8.48727	5.98836e-05
Frmd6	-0.376481	9.39743	0.000385577
Dlc1	-0.376347	8.85175	0.00225302
Was	-0.376307	8.32426	0.000370791
Arhgap30	-0.376212	8.5641	4.6834e-08
BC030477	-0.376129	8.32405	4.21712e-07
Renbp	-0.375935	10.7539	7.4962e-05
Enpp5	-0.375541	8.79127	4.39533e-05
4931431C02Rik	-0.375242	11.8221	0.000158381
BC038881	-0.374901	8.48735	1.38224e-07
5830407P18Rik	-0.37464	8.57442	1.38627e-06
3110002L15Rik	-0.374525	9.57963	1.98381e-07
Stat3	-0.374373	9.71616	0.00408517
4930504E06Rik	-0.374141	10.4472	0.0121475
Fkbp9	-0.373484	11.3233	0.0183472
Trim25	-0.372914	10.0161	7.97922e-06
Zap70	-0.372856	8.3022	0.00628751
Prdm2	-0.372406	10.6703	2.51938e-06
Timp1	-0.372034	10.9582	4.81218e-06
Sgol2	-0.371825	11.759	0.00668126
Trim26	-0.371713	10.9285	0.000839877
Gfod1	-0.371665	8.67861	0.0038867
D130063H01Rik	-0.371108	11.3649	1.16885e-05
Uchl3	-0.370598	10.0673	1.80985e-06
BC017133	-0.370575	10.405	0.000104806
Mmp11	-0.369857	9.20617	0.000328982
Mrpl14	-0.369454	11.3114	4.92012e-06
Hspb6	-0.369203	9.29045	2.65278e-05
LOC268673	-0.369113	8.97293	1.72808e-05
Tpst2	-0.368468	10.6985	1.961e-07
A530026H04Rik	-0.368243	9.20087	3.60754e-07
Col4a1	-0.367483	9.06762	0.000343791
BC025462	-0.367252	9.09417	1.21809e-07
Rap1gds1	-0.367106	10.9288	0.000328799
2610528E23Rik	-0.366842	9.21949	2.64192e-05
Flot1	-0.36679	10.1558	1.77096e-06
Mrpl10	-0.366669	11.7622	3.16335e-07
Znrd1	-0.36621	11.4992	8.91521e-05
Mrps21	-0.365916	10.8405	0.000352711
Brca2	-0.365855	9.12433	2.50321e-07
Wipi1	-0.365845	8.86994	2.23931e-08
LOC237877	-0.364962	10.1424	4.52483e-05
EG433923	-0.364693	12.6092	2.2131e-05
Ankrd47	-0.364583	9.97735	0.037396
2610319H10Rik	-0.363981	9.7653	0.00189443
1110017D15Rik	-0.363433	8.59841	0.0380908
Mical3	-0.363085	8.68566	8.84243e-06
4732436F15Rik	-0.363003	8.51734	1.57374e-07
Zc3hdc3	-0.362809	9.19085	1.8408e-06
B130017M24Rik	-0.362539	8.43044	5.00929e-05
Hnrpdl	-0.362295	10.2976	1.01856e-06
Acaa1	-0.362256	11.6393	0.00234622
Sipa1l1	-0.362102	10.8947	0.000408755
BC006705	-0.36209	11.223	0.000192391
scl0002449.1_77	-0.361975	10.8721	2.10399e-05
H6pd	-0.361653	9.25192	5.0559e-06
Adipor2	-0.361364	11.4437	0.0239198
Cox5a	-0.36103	14.26	5.09442e-06
4932408F19Rik	-0.360556	9.02917	0.00233678
Fbln1	-0.360342	8.90932	0.0008132
Rars	-0.360109	11.5998	2.65278e-05
LOC381683	-0.358806	8.57471	1.16562e-05
Sema4b	-0.358621	10.9904	8.3701e-05
Enpp4	-0.358486	8.62785	1.17252e-05
LOC215415	-0.358427	8.45585	0.00202704
Brwd1	-0.357787	9.34626	3.22916e-05
1810027I20Rik	-0.357768	8.60265	7.94606e-05
Tpmt	-0.35738	8.68435	1.35153e-10
Poli	-0.356998	9.65679	3.28056e-05
Arp3b	-0.356859	8.76214	7.8742e-06
Nid1	-0.356653	8.38606	3.76476e-05
Pecam1	-0.356498	9.20298	5.40636e-05
Myo1e	-0.356376	9.08932	8.89388e-05
A630097D09Rik	-0.355733	9.62576	3.407e-06
2410022L05Rik	-0.355372	10.4152	0.000130735
LOC654467	-0.354386	12.142	0.000321779
Rpl3l	-0.354374	8.92894	2.26231e-06
Atp5g1	-0.354302	12.9956	0.00205341
Arl4	-0.352932	8.5907	2.12823e-07
Polr2e	-0.352512	11.26	0.000114185
Cd1d1	-0.352383	8.47958	0.000154271
H2afz	-0.352327	13.1142	5.23289e-05
Gmfg	-0.352126	9.16388	0.00816117
Timm10	-0.351473	11.3803	5.44463e-07
Thtpa	-0.35144	9.40775	1.07635e-06
Fbxo6b	-0.351153	12.2598	0.000148582
Tfrc	-0.35073	12.4042	5.91827e-05
D930048N14Rik	-0.350687	9.26097	9.58395e-06
Ak3	-0.350571	8.79743	3.12098e-05
Uqcrc1	-0.3502	12.2257	2.51945e-05
scl0002864.1_26	-0.350019	8.22332	1.0581e-06
LOC381297	-0.350004	10.2748	0.000617099
C2	-0.349995	8.88174	0.023452
BC052040	-0.349691	10.5402	8.30247e-07
Osbpl9	-0.349636	11.696	5.73761e-05
Ipmk	-0.349603	9.78152	0.000649492
Mocs1	-0.349516	9.431	7.55962e-05
Slc11a1	-0.349274	9.2043	0.000266514
Fmnl2	-0.349046	9.41069	6.08758e-06
Rab8b	-0.348597	9.92521	0.000150963
Wdr5	-0.348463	10.5202	0.00392926
2810418N01Rik	-0.348402	10.4515	0.000168036
Gprasp2	-0.347956	10.0672	0.000188688
Alox12b	-0.34794	8.23924	9.96559e-05
Insig1	-0.347929	9.18138	1.63669e-07
Ak7	-0.347917	8.37109	0.00597519
Tufm	-0.347756	12.766	3.36997e-05
Ruvbl1	-0.347684	11.837	1.28318e-06
Nudc-ps1	-0.34757	9.71013	0.0105041
Zfp261	-0.347455	9.31554	2.7159e-07
Ncaph	-0.347366	11.2951	9.95987e-06
1700012H17Rik	-0.346519	9.89803	5.47334e-07
Stard8	-0.346329	8.47477	0.00315422
BC060631	-0.346183	10.5191	8.25123e-08
Pvr	-0.345993	8.67714	5.18874e-07
Tmem2	-0.345285	10.253	0.000169078
Mknk1	-0.34516	8.87992	5.44463e-07
2610019E17Rik	-0.345004	11.4955	0.00241327
AI450540	-0.344891	10.5353	7.96662e-06
Sipa1l2	-0.344778	8.75778	8.80845e-07
5730409G15Rik	-0.344558	8.97176	1.86809e-05
D14Ertd226e	-0.34443	10.4118	0.00135645
Mrpl28	-0.344314	12.5875	7.13314e-05
0610007P14Rik	-0.343459	10.4983	3.11929e-06
Rnu3ip2	-0.343368	10.6109	2.54281e-05
Cbln1	-0.343267	8.32299	0.0104865
Spp1	-0.343168	12.0813	0.00748903
E2f2	-0.342953	8.47621	0.000111338
Pros1	-0.342386	8.61234	0.0239711
1110014J17Rik	-0.34215	12.1196	0.000123771
Cdk2	-0.342008	10.9533	2.20744e-07
Mcm4	-0.341816	12.3815	2.54397e-05
5730419I09Rik	-0.341402	9.34045	0.000333563
Sox16	-0.341057	8.69911	1.62029e-05
Tbl2	-0.340872	9.44795	8.70132e-07
Chek2	-0.340441	9.0587	1.67894e-06
D11Ertd636e	-0.340214	9.73658	0.00254317
Rbm8	-0.339712	10.2471	0.000278606
Slc39a4	-0.33894	9.63697	0.0100603
Centa1	-0.338031	8.32762	0.00088363
Vdac1	-0.337303	13.5147	9.89674e-05
Them2	-0.336842	11.4987	0.00461392
Mbd4	-0.33626	9.22475	4.52378e-06
Bcat1	-0.335875	10.637	2.36869e-05
Bckdhb	-0.335715	9.28359	0.000951012
Cyp2s1	-0.335426	8.90156	5.4316e-05
BC044804	-0.33532	8.4609	1.08516e-05
Ampd1	-0.335093	8.36159	1.7117e-06
E330035H20Rik	-0.334732	8.14879	6.47676e-07
4930455G09Rik	-0.334167	8.1843	0.000524264
2700097O09Rik	-0.334104	11.6479	2.2131e-05
Aldh3a1	-0.334102	8.15188	1.65649e-06
Dnajc15	-0.334069	11.5235	0.00174109
Cst3	-0.333827	11.4311	0.00240819
2210419D22Rik	-0.332994	10.7351	2.42553e-06
9430023L20Rik	-0.3326	10.8555	1.80879e-05
Acat2	-0.3321	10.3055	0.000891218
Chst8	-0.331485	9.15016	0.000569689
Ifrg15	-0.331048	8.61059	0.0105125
Reep1	-0.33068	8.9649	0.00511789
1190002F15Rik	-0.330323	9.07503	0.00169676
X83328	-0.329934	10.2902	0.000656767
Gcap14	-0.329764	10.1043	0.000921907
Osr1	-0.329579	11.1111	0.00364127
Exosc5	-0.32929	10.8598	0.000145409
Klf3	-0.329258	8.92375	3.37454e-05
1110054N06Rik	-0.329211	8.57212	5.18996e-05
scl0003933.1_1635	-0.328918	10.1111	9.04763e-05
Bcl6	-0.32886	8.67262	0.000555749
Tbrg1	-0.32878	11.123	0.000289238
LOC654426	-0.328457	12.27	3.66823e-05
E030026I10Rik	-0.327901	8.57205	8.2716e-06
BC024659	-0.327528	8.74197	1.84126e-08
2610018O07Rik	-0.327429	8.69441	2.94868e-07
Poldip2	-0.327428	11.6983	8.7249e-05
Impdh2	-0.325821	13.8681	6.93312e-05
1700016D06Rik	-0.325596	8.23675	0.00543924
BC006933	-0.325154	10.323	3.10924e-07
Bcas3	-0.324943	10.5992	0.000260687
LOC383809	-0.324483	8.47583	0.0314455
Vps54	-0.324161	10.6486	0.00229956
Ephx2	-0.323831	9.17244	0.000799459
Nudt5	-0.323065	12.0875	4.18388e-05
Slc25a28	-0.323017	11.066	0.000302693
Fignl1	-0.321504	11.6089	0.000255661
4930422J18Rik	-0.321496	9.17696	0.0128456
Krt10	-0.321242	9.41177	2.30782e-06
Prkaa2	-0.321198	8.43258	1.73577e-05
Pdzk1	-0.321002	8.67227	0.00610305
Usp11	-0.320492	8.67502	5.96654e-05
2610205E22Rik	-0.320306	9.17275	2.00093e-05
Akap1	-0.320305	8.96218	7.88612e-09
0610039N19Rik	-0.320162	9.0807	2.24566e-05
Cdca3	-0.320143	11.7596	0.000111147
Snrpd2	-0.319859	14.0547	3.67247e-05
Pkp4	-0.319421	9.97994	4.5272e-05
Cdipt	-0.319108	10.0088	2.08144e-06
H1fx	-0.318986	9.2803	0.00630429
Ddah1	-0.318257	10.7789	0.0230972
Slc25a25	-0.317612	8.71297	0.000317814
Epb4.1l4a	-0.317368	9.73229	0.000573065
Snrpa1	-0.317236	11.184	0.00178192
Cd97	-0.317166	8.81585	2.89754e-07
Map2k3	-0.317149	11.4738	8.08606e-05
BC032967	-0.31677	8.38703	4.3826e-07
Ly6g6d	-0.316554	8.23546	5.99451e-05
Atp2a2	-0.316445	10.1766	0.000528709
Gnb1l	-0.316276	8.90526	1.0351e-05
LOC380888	-0.3161	8.53875	6.77337e-05
Fbxo36	-0.315965	8.54058	0.015371
Rab6b	-0.31591	8.78887	0.000101491
2310014H19Rik	-0.315801	9.03142	3.71103e-06
Wdhd1	-0.315746	9.29826	0.0003271
Gmppa	-0.315734	9.33941	0.0338279
Hadh2	-0.315714	10.7856	0.000870315
9930032E18Rik	-0.315638	9.2115	1.48104e-05
Rnf34	-0.315246	10.4012	1.2977e-05
Noc2l	-0.315145	11.7836	4.81218e-06
3000003G13Rik	-0.315126	9.53361	6.97007e-05
Jundm2	-0.313877	8.42376	2.68616e-06
Piga	-0.31376	9.43946	2.06469e-05
Ilf2	-0.313252	12.1466	6.49833e-06
Kif22	-0.312773	12.0542	0.000705083
C230081A13Rik	-0.312745	8.31938	2.0899e-06
6330403E01Rik	-0.312647	9.76272	0.000960592
Rhou	-0.312477	9.25256	0.017033
Tes	-0.312155	9.69232	0.000306005
Knsl5	-0.312104	9.70518	0.00502104
Nfatc4	-0.311906	10.1407	6.42907e-05
Echdc2	-0.311509	10.6721	0.00132028
Ncapd2	-0.311431	10.2201	5.81751e-06
3110053G12Rik	-0.311273	9.12633	6.76768e-05
Ube1c	-0.31114	9.78625	0.00198308
Suv420h2	-0.310958	10.8672	8.2716e-06
2600009K23Rik	-0.310763	8.55252	7.2582e-06
Rad51ap1	-0.310695	9.00203	5.97673e-06
Tnfaip8	-0.310296	8.89202	0.0331103
Ctnna1	-0.310121	14.0103	1.39004e-05
D930046M13Rik	-0.309916	8.32276	0.000371493
Gabarapl1	-0.309808	9.54423	0.00211376
Saa3	-0.30957	8.43511	4.64159e-05
Cdc42ep3	-0.309562	8.94611	0.000242087
Glb1	-0.309056	9.15201	0.000409263
C330006H24Rik	-0.309031	8.31091	3.78126e-09
Blm	-0.308948	10.9482	2.59336e-08
Slc29a3	-0.308123	8.73536	8.06389e-05
Fbxo34	-0.307842	9.95824	5.37167e-07
2700084L22Rik	-0.307804	8.37013	0.00133354
Nlrx1	-0.307652	8.3053	0.0235894
LOC218617	-0.307447	8.17955	6.82486e-05
C330042K07Rik	-0.307247	8.8684	1.18242e-05
E130102H24Rik	-0.306894	9.63541	0.0125775
Ptch1	-0.306559	8.75923	3.10674e-07
scl0004020.1_31	-0.306514	11.2337	6.12178e-05
Mapk6	-0.306489	10.0617	4.92641e-06
LOC230824	-0.306457	8.43777	3.46355e-05
1700024G10Rik	-0.306369	8.30648	0.0225519
0610007N19Rik	-0.306275	8.74284	2.80444e-05
Pygb	-0.30601	9.31413	4.88627e-05
Pou5f1	-0.305846	13.2584	0.0026741
4833425P12Rik	-0.305802	9.31557	0.00030883
Idh3a	-0.305684	9.23775	1.78306e-05
Pter	-0.305334	8.98293	8.57943e-07
Ppid	-0.305184	13.7189	0.000292573
A130047F11Rik	-0.305176	8.42126	8.11644e-05
D730049H07Rik	-0.305029	9.26238	0.00048367
Cox8a	-0.304707	13.1592	0.000167244
6430628O11Rik	-0.304274	9.04648	0.0311713
6330403M23Rik	-0.304154	9.05727	0.0091915
Stat4	-0.304128	8.35833	2.78868e-05
Rmnd5b	-0.304104	8.76145	0.000125515
Cox4i1	-0.304062	14.0836	3.58014e-05
2410018C17Rik	-0.303996	11.508	0.00210767
Slc25a26	-0.303903	9.19207	4.56865e-05
Ivd	-0.303888	9.04865	1.15327e-05
Psap	-0.303819	11.5344	2.74588e-05
scl0001627.1_140	-0.303775	9.78827	0.000212648
Idh3g	-0.30363	12.4795	0.000312985
Wdr9	-0.3034	8.85995	1.03643e-05
Eif2b4	-0.303354	11.3021	1.03975e-05
Snta1	-0.303227	9.07099	2.44462e-07
Bach1	-0.303086	10.2031	0.000860592
Kif2c	-0.302886	11.5822	9.36881e-05
Smad5	-0.302485	8.81288	0.0066524
3830612M24	-0.302231	8.45584	9.97042e-08
4930455F23Rik	-0.301998	9.44143	0.0154229
Extl3	-0.30183	9.5241	1.89097e-06
Padi6	-0.301363	8.31021	0.000134432
Mvp	-0.301243	10.1355	0.0166834
4631405K08Rik	-0.301184	8.18589	2.61813e-06
2610014F08Rik	-0.301121	8.96196	8.79284e-05
Eml4	-0.301064	10.4367	0.000109745
Crlf3	-0.301021	10.8382	6.6429e-05
LOC215999	-0.300878	8.57615	9.05479e-05
Cish	-0.30077	9.01928	0.00117888
Acot7	-0.300758	11.1643	0.00149053
AI449441	-0.300336	10.2885	0.00937939
Espl1	-0.300152	9.19544	2.42348e-05
2700024H10Rik	-0.300055	9.47451	3.24511e-05
1110020P15Rik	-0.299945	14.4104	1.16085e-05
Eed	-0.29993	9.8868	0.00447053
Gnptab	-0.299536	8.71552	2.27471e-05
Skp2	-0.299352	9.73788	2.7404e-07
2410116G06Rik	-0.299347	11.8652	0.00186502
6820402O20Rik	-0.299111	10.4215	0.000191061
Dkk3	-0.298989	8.24489	0.000113799
Impa2	-0.298936	9.96632	1.3171e-05
Gprc5b	-0.298713	8.362	0.00461392
2700029E10Rik	-0.298236	9.22437	0.00195824
AW060207	-0.298123	9.56326	2.18258e-08
Ung	-0.298012	10.2861	3.905e-05
Atp2a3	-0.297519	8.25857	0.000343791
Nos3as	-0.297241	9.17933	0.00623519
Nesg1	-0.297007	8.14789	2.99721e-05
LOC277860	-0.296924	9.25333	0.000533632
4932443D16Rik	-0.296731	8.41247	1.14646e-05
5730593F17Rik	-0.296521	9.5433	0.00044957
Pex11b	-0.296198	10.5071	1.98017e-06
Adssl1	-0.296066	8.53461	1.28118e-06
Pip5k2a	-0.296059	9.39456	0.00038429
Gstt3	-0.296011	8.76361	2.25254e-05
Cd3e	-0.295558	8.16402	0.0338251
Gna13	-0.295425	10.5153	0.000101778
Gstm6	-0.29498	8.46113	5.46367e-05
Lgmn	-0.294972	10.0263	0.0164772
Slc28a1	-0.294867	9.67994	0.0172306
Pik4ca	-0.294584	10.9501	0.0349853
D4Bwg0951e	-0.294578	8.53796	0.0164504
AW413632	-0.294392	9.17318	1.92007e-05
Hps1	-0.294368	8.88546	0.000129482
Slc13a4	-0.294143	8.09563	0.000352566
Chst3	-0.293373	8.16518	2.39063e-05
2610034N24Rik	-0.292955	11.8792	0.000742746
Zfp148	-0.292852	8.85394	4.37845e-08
1810014F10Rik	-0.292664	10.7704	0.00117211
5730527J01Rik	-0.292637	10.4609	0.000121022
C1qtnf4	-0.292588	8.28625	6.0874e-06
Nedd4l	-0.292343	9.57042	0.000161667
Galm	-0.291981	8.449	0.000230879
LOC269859	-0.291931	9.08032	0.0421216
Serping1	-0.291592	8.89551	0.00115547
Fgf10	-0.291454	8.06332	1.36131e-09
Entpd6	-0.291229	8.71751	4.62011e-05
Cln5	-0.29079	11.1716	0.0372916
Tmem81	-0.290351	8.55925	0.00355685
Tusc4	-0.290088	9.85473	0.00121603
Cla3	-0.289771	8.76603	0.000156766
Tfdp1	-0.289628	11.5677	0.00566366
2310057D15Rik	-0.289018	9.74939	0.000906709
Nubp2	-0.288962	9.94357	2.50337e-06
scl000057.1_28_REVCOMP	-0.288675	8.49611	2.38644e-05
Atp5g3	-0.288526	15.3055	0.00151371
Aplp1	-0.28843	8.96901	0.00452898
Pip5k1a	-0.288325	8.25974	1.48797e-05
Tmprss5	-0.288301	8.14306	2.58146e-08
Mkrn2	-0.288276	10.0148	0.000216052
LOC382843	-0.287877	10.0267	0.000162486
Fuk	-0.287833	8.91299	1.78016e-05
Hebp1	-0.287593	9.01488	0.0214946
LOC277856	-0.287119	12.2176	0.00339091
2210408F11Rik	-0.286924	9.94005	0.0147112
1700012G19Rik	-0.286485	13.2648	0.000104939
Sgk2	-0.286265	8.22524	9.93588e-06
scl0004176.1_1597	-0.285916	9.7347	2.28867e-06
Pdir	-0.285453	9.08146	4.44518e-06
Fstl	-0.285293	8.47336	0.00515732
Tagln3	-0.284868	8.2233	3.13364e-06
BC004701	-0.284719	8.38603	1.55076e-05
2610019F03Rik	-0.284679	9.29974	0.000324897
Plxdc1	-0.284354	8.31205	5.08632e-07
Nos3	-0.284331	8.23415	2.9403e-05
Coq2	-0.284301	10.1552	0.0333247
Homer2	-0.284104	9.53806	0.000212395
BC048355	-0.284101	9.50686	0.00535516
1700028N11Rik	-0.283652	8.44557	0.000863822
Cdca2	-0.283614	11.9491	1.71165e-05
Rybp	-0.283384	11.1597	0.000619424
Cbfa2t2h	-0.283381	8.40306	5.12292e-08
Map3k1	-0.283333	11.349	1.8157e-05
2810439M11Rik	-0.283242	8.93427	0.000312985
Fpgt	-0.283235	8.64411	1.74538e-06
Zic3	-0.283135	10.7241	0.0071893
Dgkh	-0.282992	8.3904	3.41884e-07
Foxred1	-0.282756	9.2655	3.1967e-07
Pkm2	-0.28248	13.982	0.000106397
Def6	-0.282392	9.26365	0.00261306
Psmd7	-0.282231	11.4917	5.2534e-05
Pccb	-0.2822	8.55567	1.76392e-05
Ahsa1	-0.282051	10.5611	0.00187793
Amhr2	-0.281883	8.5703	3.89211e-07
Zfp553	-0.281822	9.35924	0.00043863
D15Ertd682e	-0.281761	9.20337	0.000595087
Rps6kl1	-0.281709	9.03751	0.00457289
Pttg1	-0.281664	8.22855	0.000762477
Ribc1	-0.281201	9.18144	0.0242203
Phgdh	-0.281081	10.5938	0.00167489
Nudt2	-0.281004	9.27357	0.00027465
1700023M09Rik	-0.28078	10.9277	0.000155241
Smoc1	-0.280681	8.90358	0.00123936
Nfkbia	-0.280475	8.7129	0.000273741
Ankrd10	-0.280159	9.13689	0.000684443
Tnfrsf13c	-0.280071	8.14819	0.00315422
1700024K14Rik	-0.280055	8.69983	0.000124895
Ahcyl1	-0.280051	10.4876	6.57153e-05
Atp5o	-0.279548	13.0807	0.000164804
1810033A06Rik	-0.279122	9.35433	0.00166735
Cdc42ep2	-0.279087	8.33869	1.6757e-06
C530015M04Rik	-0.279012	9.97423	0.00133471
Vdac3	-0.278911	10.8717	0.00891176
Psmf1	-0.278897	9.83883	7.07904e-08
Siva	-0.278868	13.4754	1.03839e-05
Selenbp1	-0.278651	8.19343	0.000162486
Cib1	-0.278536	10.8265	0.000267143
Kctd1	-0.278362	8.29512	1.9145e-05
Cox10	-0.27824	11.4981	0.00228563
Tbc1d15	-0.277927	11.2493	0.00299569
Stard5	-0.277915	9.07135	0.0049421
Ddb2	-0.277889	8.95408	0.000954838
Ogt	-0.277817	9.82011	4.6668e-05
Wdr60	-0.277419	8.25871	2.96026e-05
1100001A21Rik	-0.277414	9.23474	0.0160566
A230005G17Rik	-0.277179	8.49215	1.03379e-05
Peg3	-0.276954	10.104	0.00144405
Ldh1	-0.276927	14.9172	0.00189331
Pbk	-0.276724	11.2767	0.0306352
Ascc3l1	-0.276689	9.86608	0.000659036
Apg10l	-0.276651	8.95228	0.0132204
Nthl1	-0.276461	9.54148	0.00798725
Tex264	-0.27628	8.94031	6.70784e-05
LOC381527	-0.276136	8.25438	0.00215398
Rxra	-0.276134	8.34267	0.000389142
Robo1	-0.27582	8.42425	6.83074e-06
Sulf2	-0.275643	10.3018	0.00435335
Lig1	-0.275296	10.2269	2.23879e-05
C030011O14Rik	-0.27512	9.68241	0.0303677
Esco2	-0.275023	11.5638	0.0111366
Arntl	-0.274973	8.44231	2.29156e-05
Nefh	-0.274739	8.55272	0.00281431
Jcam2	-0.274712	8.12294	6.70947e-05
BC003266	-0.274006	10.2363	0.000501181
Aaas	-0.273927	10.357	8.88775e-07
Col9a2	-0.273729	8.5315	0.000229002
Kcnk5	-0.273669	9.49282	0.0001907
2010005E20Rik	-0.273477	8.47886	0.000276041
8030474H12Rik	-0.273282	8.7117	4.54715e-05
Jmjd2b	-0.273195	9.52529	0.00132193
Dsg2	-0.272906	9.06072	0.0205097
Banf1	-0.272848	12.2681	1.71566e-05
E130107N23Rik	-0.272811	10.4262	7.01245e-05
Snx10	-0.272518	10.8878	0.029419
scl0003955.1_3	-0.272398	8.37885	0.000276041
C530028I08Rik	-0.272069	8.9355	0.000167434
6620401K05Rik	-0.271889	9.12003	0.00010465
Stx12	-0.271612	9.3385	0.000237829
Axin	-0.271199	9.72886	6.92705e-06
B430110C06Rik	-0.271058	8.38647	2.9515e-06
Aurkb	-0.270959	10.7135	0.000164155
Atp5a1	-0.270607	10.1022	0.0284922
Nol6	-0.270566	10.5292	0.000226196
0610012G03Rik	-0.27045	10.8148	0.000361569
6430514L14Rik	-0.270204	8.17068	3.86483e-06
Epb4.1	-0.269901	10.0302	9.55789e-05
Gys3	-0.269637	8.84595	0.0130842
Chaf1b	-0.269614	11.763	0.000165747
Pcolce2	-0.269422	8.83716	0.00226207
D19Ertd144e	-0.269223	9.37794	0.00227953
LOC226486	-0.269091	9.26271	0.000243814
Actr3b	-0.269076	8.82442	0.00223693
Mlf1	-0.26906	8.71046	0.00704205
2610200O14Rik	-0.268971	8.34076	7.23245e-06
1500031L02Rik	-0.268881	10.0814	8.14618e-07
3010031K01Rik	-0.268878	8.28687	0.000402858
Fbxo2	-0.268626	9.91898	0.00310813
E030003N15Rik	-0.267869	8.54853	0.00320855
Bckdha	-0.267786	10.2345	0.00155596
Plekhk1	-0.267753	8.99621	4.06061e-07
4930429O20Rik	-0.267583	8.41126	0.000492679
Rad54l	-0.267413	10.1533	0.000281216
Tada2l	-0.267106	9.20514	1.3306e-05
Arl6ip5	-0.267093	9.98402	0.0017379
Taf5l	-0.266948	9.75008	0.00359006
BC035954	-0.266902	9.1635	0.0017401
Hspcb	-0.266793	13.9166	0.000256703
2410006F12Rik	-0.26669	10.0691	0.000170587
Slc12a7	-0.266679	8.42191	6.5765e-06
Plrg1	-0.266565	13.2485	0.00045648
Sepx1	-0.266521	8.41188	1.92007e-05
LOC381150	-0.266392	8.34739	1.4782e-06
scl0002445.1_75	-0.266353	8.67081	4.68793e-05
Pgpep1	-0.266132	9.47447	5.86969e-05
Ubadc1	-0.265994	10.1583	1.5788e-05
Numa1	-0.265831	9.01212	2.46818e-05
Ift140	-0.265677	8.71449	1.76969e-06
BC004012	-0.265649	11.5228	5.42071e-05
Pmvk	-0.26548	8.7704	0.00326977
1110003F05Rik	-0.265193	8.42335	2.96267e-05
LOC268569	-0.26509	14.4519	0.000476491
Plod1	-0.265022	8.40986	0.00232928
Dguok	-0.264938	9.84271	0.000113574
Npepl1	-0.264812	9.84757	0.000252871
Adam23	-0.264295	8.23961	0.00119718
Tdgf1	-0.264061	8.52111	5.27838e-05
5830476B15Rik	-0.26406	8.85792	8.76645e-05
Gngt2	-0.263949	8.43105	3.94746e-06
Tmsb10	-0.26394	13.6888	0.00074402
Tcof1	-0.263886	9.63987	0.00113695
Gmcl1	-0.263882	9.755	3.75713e-07
Prss19	-0.263523	9.02438	0.00725047
Actn3	-0.2633	8.7505	1.44973e-06
Nrd1	-0.263099	12.2615	0.000464845
Upf1	-0.263097	9.71979	0.00109338
Csad	-0.263061	8.72902	0.0141545
Gsdmdc1	-0.263056	8.15946	7.21744e-05
5830409B07Rik	-0.263046	8.27709	0.000330926
Mrpl4	-0.263013	10.3565	0.00126897
Ccne1	-0.262782	9.9178	0.00723682
Susd2	-0.262766	8.30761	0.000991502
Cnot10	-0.26223	10.3501	0.000218048
LOC381691	-0.26207	9.14402	0.000678812
Tnk2	-0.261566	8.76894	0.000277462
Clspn	-0.261164	10.0415	1.63031e-05
Smox	-0.26108	8.51218	0.0123358
Amid	-0.260869	8.55949	4.04517e-07
0610040B21Rik	-0.260869	8.85254	0.000436988
Tob1	-0.260846	8.89107	0.0370958
Ndufa7	-0.260815	13.5468	1.57326e-05
Rapsn	-0.260763	8.23372	2.51059e-08
Rnaseh2a	-0.260722	10.1964	0.0125886
LOC224732	-0.260684	9.19929	0.0210395
Pank1	-0.260675	8.74072	5.62949e-05
Tmem136	-0.260256	8.28979	5.76557e-05
E430026A01Rik	-0.260071	10.993	0.0115284
Rasa3	-0.259998	8.31905	1.30559e-06
6330411E07Rik	-0.259993	8.42961	4.3794e-05
Ryd5	-0.259899	8.11711	1.26046e-05
2810047L02Rik	-0.259782	8.49164	0.047992
6230400G14Rik	-0.25968	8.2977	6.99838e-07
2310036D04Rik	-0.259452	8.3561	1.45012e-05
5033421J10Rik	-0.259373	8.95529	7.05922e-05
Bbs2	-0.259198	8.6148	0.00150588
Crabp1	-0.258624	8.18409	0.0405449
Vpreb3	-0.258503	8.18032	3.45078e-06
Nars	-0.257863	11.6962	0.00977324
Nxt1	-0.257739	9.83399	0.000279399
Acsl1	-0.257534	8.8522	0.000456578
Atp6ap2	-0.257258	10.8152	2.09329e-05
Napsa	-0.257066	8.1036	1.60479e-06
AI467606	-0.256999	9.01348	0.00156855
Gpsn2	-0.256973	11.4726	0.00287364
Tfb1m	-0.256665	9.13206	4.73274e-05
Rabgef1	-0.256498	10.2901	0.00236428
1700026B20Rik	-0.256003	9.4487	1.12108e-05
Atad3a	-0.255988	11.7117	0.00350215
Ndp52	-0.25564	8.48661	0.00250746
Lsm10	-0.255636	10.6784	0.0116826
2310035K24Rik	-0.255581	8.74249	5.00929e-05
Mum1	-0.255564	12.1339	0.000568477
scl0002759.1_7	-0.255408	9.53004	0.00435955
Dock1	-0.255084	8.47377	1.43876e-05
Cited2	-0.254644	9.75577	0.0120491
Mt3	-0.254532	8.91194	0.0338381
Hspbap1	-0.254373	11.0299	0.000310717
Eif2c2	-0.254293	9.10503	0.00909212
Mrps5	-0.253692	10.2425	3.8719e-05
Pias3	-0.253673	9.08187	0.000113245
Pde8a	-0.253593	8.21354	8.89242e-05
B230373P09Rik	-0.253438	8.55605	0.000343776
Sdhb	-0.253407	9.96301	2.24566e-05
Ssna1	-0.253245	10.406	9.03593e-05
1110037N09Rik	-0.25292	9.98199	0.00166646
Hnrph3	-0.252862	9.11294	0.000778682
Dact2	-0.252671	8.4776	6.56207e-06
Nfe2l2	-0.251878	8.89168	7.03613e-05
Mapk9	-0.251751	9.71686	0.00025234
Mvd	-0.251654	9.57056	0.00984216
Ift81	-0.251475	9.18371	6.40465e-06
6720458D17Rik	-0.251068	8.19776	0.00205979
Tspo	-0.250746	9.57835	0.000596579
Pde4d	-0.250718	8.27316	3.94746e-06
Calm3	-0.250622	12.3543	0.00098905
Pip5k2b	-0.250519	9.914	0.00053069
Mcee	-0.250369	10.8558	0.000375988
Th1l	-0.250236	10.2994	0.000578496
Taldo1	-0.250216	12.9672	0.000358762
Phf19	-0.250051	8.31224	5.26145e-05
AA175286	-0.24997	8.11735	0.0193943
1110025F24Rik	-0.249774	10.5116	0.00566455
9330134C04Rik	-0.249648	10.167	0.000743901
Lrrc5	-0.249407	11.7388	0.0358336
E530004K11Rik	-0.249394	8.10737	1.19616e-06
3110001P07Rik	-0.249274	10.8912	0.00430079
4930418P06Rik	-0.248917	9.12798	0.00978601
Acac	-0.24882	10.977	0.000641426
BC024814	-0.248368	9.13368	0.00347117
1810049H13Rik	-0.248249	9.04116	0.0387258
3110013H01Rik	-0.2482	11.9446	0.0143102
2500002L14Rik	-0.248095	11.5768	0.000289238
4930563B10Rik	-0.248035	9.7788	0.00874424
B930074N03Rik	-0.247947	9.65879	0.00620688
4930521E07Rik	-0.247933	8.55158	5.11215e-06
LOC380718	-0.247906	8.8644	0.00100482
Rad1	-0.247817	9.61214	9.06945e-05
Mocs2	-0.247702	9.23567	0.000352433
Sec6l1	-0.247062	9.41451	5.53191e-05
Eif5a	-0.246964	13.1803	0.00135071
0610010K14Rik	-0.246826	9.88002	0.00307857
Ldhc	-0.24679	8.18874	0.00333086
Tmem143	-0.246702	8.67966	2.91959e-06
4930424G05Rik	-0.246573	8.21286	0.00114463
Nenf	-0.24645	9.50315	0.00495497
Sdfr2	-0.246416	9.81007	0.0171767
scl0003078.1_29	-0.245589	8.49501	2.01302e-05
1700008D07Rik	-0.245528	8.70329	0.000423835
4933412A02Rik	-0.24548	9.53403	0.00417964
LOC381995	-0.245441	8.60819	0.000251596
1500019G21Rik	-0.245396	9.53511	0.0197748
Ppat	-0.245362	9.54624	0.000502042
Rwdd2	-0.245063	8.62094	0.0081577
Etfb	-0.244957	11.8148	0.000448152
Epb4.1l4b	-0.24491	9.02979	3.39318e-05
Arhgap9	-0.244808	8.28529	0.000664847
Adprtl2	-0.2446	11.4341	3.22287e-05
A230021I18Rik	-0.244322	8.16393	1.65288e-07
Erf	-0.244263	8.48957	0.0150698
Twistnb	-0.24402	9.82525	0.00023877
P4ha1	-0.243945	8.58917	1.04132e-05
1110001K21Rik	-0.243864	11.0109	3.64115e-05
Manba	-0.243761	12.0804	0.0491413
Cox15	-0.243691	10.3798	7.26769e-05
Gja4	-0.243434	8.14683	3.86134e-05
1110020K19Rik	-0.243386	9.54123	0.000342222
Car12	-0.24326	8.14452	1.65192e-06
Mcm2	-0.243223	12.0476	0.000394453
Chaf1a	-0.243199	10.4642	0.0087349
C230050J15Rik	-0.242934	8.26783	0.0302105
2610018I03Rik	-0.242724	8.74948	0.000127405
1700030K09Rik	-0.242607	9.09259	6.86061e-05
5430440L12Rik	-0.242585	9.41746	2.0804e-05
Gdf3	-0.24243	11.8544	0.00336039
Cchcr1	-0.242422	9.03069	0.000975024
BC016495	-0.242386	8.54287	0.00695651
Arrdc3	-0.242308	9.88801	0.000525109
Acacb	-0.242288	8.64199	1.44488e-05
Prpf4	-0.242254	10.0476	0.00719574
H2afy3	-0.24203	8.63352	0.010426
Fpgs	-0.241969	10.4975	0.00517714
Calu	-0.241964	9.92771	1.89173e-05
Slc25a12	-0.241947	8.83477	0.0244456
Psip1	-0.241945	11.6147	0.00125857
Ppie	-0.241921	10.1124	6.11554e-05
2210008N01Rik	-0.241841	8.31926	0.000633669
Cdc14b	-0.24181	9.06845	0.000194681
Smarcd3	-0.24178	8.15374	0.0447537
Tmbim1	-0.241417	8.54103	0.0189596
Pcsk9	-0.241181	8.2657	6.43283e-05
Ddx48	-0.241044	12.3176	0.00601357
LOC384206	-0.240857	14.7647	0.00224702
5930416I19Rik	-0.240658	11.9652	0.000853102
Uaca	-0.24035	11.1773	0.0352734
scl0001708.1_442	-0.240319	11.4073	0.0136027
Nol8	-0.240169	11.3272	0.000126311
Ccdc109a	-0.239818	8.37788	0.00100248
B230219D22Rik	-0.239811	9.95574	0.00507408
D030051D21	-0.23941	9.35403	0.000105114
Fndc3b	-0.239227	9.31835	0.00972908
Upp1	-0.239164	13.5064	0.0387258
Dusp1	-0.239046	12.1687	0.0472455
Chc1	-0.238921	9.85409	0.0187265
Ap2a1	-0.238439	9.36703	6.85182e-05
D430022H17Rik	-0.238273	9.08338	0.0118175
Cltb	-0.238201	8.48984	0.000699593
A530050D06Rik	-0.237936	8.25902	0.00133563
Acads	-0.237887	9.04645	0.00282145
Statip1	-0.237502	11.16	7.98598e-05
9830139D05Rik	-0.237426	9.36918	0.00236677
Dlg5	-0.236853	10.6854	0.0020448
1300006C06Rik	-0.236837	11.0445	0.000211031
Usp1	-0.236823	9.59011	0.000256486
4732495E13Rik	-0.236726	11.8413	0.00572859
A930026I22Rik	-0.236596	9.27545	0.00481928
Atp5c1	-0.236464	14.2224	0.00149412
Pdpk1	-0.236435	9.77513	0.000143603
Smad6	-0.236397	8.40071	0.00160491
Rps6ka1	-0.236372	11.3339	0.000155441
Nup85	-0.236338	11.8647	0.00393475
LOC384434	-0.236268	8.6471	0.0222237
Sp2	-0.236266	8.37658	2.15487e-06
Ddx41	-0.236261	11.512	4.27238e-05
Paox	-0.23614	10.9789	0.0405854
B230385N19Rik	-0.235925	8.31774	8.10982e-05
D15Ertd621e	-0.235884	9.8304	0.00361115
D630016K15Rik	-0.23583	8.69428	0.00132507
Pi4k2a	-0.235766	10.7739	0.0230244
D10Ertd322e	-0.235728	12.2984	0.000383445
Uhrf1	-0.235664	12.0062	8.98197e-05
Mtf1	-0.235625	8.63135	3.22146e-05
Slc35b3	-0.235312	9.11555	0.00201888
Dgkz	-0.234998	9.10628	3.97446e-05
5530400P07Rik	-0.234964	10.7658	0.00725047
Mrpl13	-0.234938	11.2714	0.00535366
Gm631	-0.234869	9.53487	0.00420855
Ddah2	-0.234842	9.04436	0.00221012
LOC230075	-0.234751	13.3627	0.00054591
Prkrir	-0.234446	9.39906	0.0124321
2010313D22Rik	-0.234265	8.63878	0.00656945
Trp53	-0.234078	10.5493	0.000414468
Clcnkb	-0.234001	9.65735	0.00640025
4933407H13Rik	-0.233914	9.47081	0.00414042
1600021P15Rik	-0.233895	10.3338	0.00730967
LOC234081	-0.23342	10.3585	0.0177571
B230113M03Rik	-0.23337	12.6542	0.00548203
Dnmt1	-0.233006	10.9538	0.0278435
AK122209	-0.232995	9.86655	0.0388655
5830412B09Rik	-0.232918	10.1812	0.0136909
Trp53i11	-0.232852	8.11062	0.00117646
C030026E19Rik	-0.232825	11.0031	0.000411606
Grhl3	-0.232816	8.19498	0.00056611
9530014D17Rik	-0.232751	9.02061	1.05247e-05
Triml1	-0.232563	10.0693	0.0141265
Brrn1	-0.232408	10.1437	0.00554527
Kcnab2	-0.232152	8.26879	0.00329916
3000003F02Rik	-0.232055	9.224	0.00517714
4732467B22	-0.232048	8.12311	2.94658e-05
Dact1	-0.232019	8.18146	0.000548195
D10Bwg1379e	-0.231949	8.31138	0.0135655
1700061G19Rik	-0.231925	9.53879	0.0328909
2700032M20Rik	-0.231871	8.86737	0.000233473
Oxsr1	-0.231861	9.15377	0.000663756
1700023O11Rik	-0.231698	10.088	1.17531e-05
4930449E07Rik	-0.231655	8.3117	9.09646e-06
Hist2h2ab	-0.231506	9.4427	6.69508e-05
Mcm7	-0.231426	11.1066	0.00566202
Gipc2	-0.230866	8.83398	0.000381433
Xrcc2	-0.230778	8.72427	1.87019e-05
2610018L09Rik	-0.230755	10.587	0.00584684
Tagap	-0.230726	9.16512	1.22429e-06
Afg3l2	-0.230665	8.86303	0.000714895
Hspa2	-0.230563	9.10871	0.0425709
9130422G05Rik	-0.230468	9.69045	1.70974e-05
BC023055	-0.230418	8.62604	0.00401515
Usp54	-0.230353	9.92788	0.000228208
Gtf2e1	-0.230007	10.8581	0.0114183
LOC210582	-0.229829	8.72494	0.00792974
2810004N20Rik	-0.229767	9.83836	0.0137251
scl0002855.1_1056	-0.229459	9.03886	0.0148339
1500009L16Rik	-0.229366	10.7933	0.0143
Mgea6	-0.229352	11.2273	0.00178273
Ap2a2	-0.229264	9.96347	0.00191978
Fbxw5	-0.228986	10.7896	3.91255e-05
Slc22a18	-0.228964	8.26375	0.00258976
Lyar	-0.228869	9.36438	0.00363162
Shmt2	-0.228776	9.87172	0.00173148
4733401O04Rik	-0.228475	8.07264	9.35148e-07
Tsrc1	-0.228475	8.44062	0.000331612
Atp5j	-0.228419	12.435	0.0121272
Phactr4	-0.228066	11.0868	0.00171615
LOC269355	-0.227767	11.5175	0.0104809
Pla2g12a	-0.227397	9.33633	0.00609033
Ciapin1	-0.227365	10.1189	5.50228e-05
2610111M03Rik	-0.227276	9.06104	0.00113514
Ndufaf1	-0.227244	10.4625	0.00177171
Fxr2h	-0.227147	9.50851	6.83732e-05
1110019L22Rik	-0.226972	8.29886	0.011535
Pex11a	-0.226963	8.63549	0.000575155
Garnl4	-0.226691	8.69656	0.000112166
2810002N01Rik	-0.226619	10.2405	0.045307
0610031G08Rik	-0.226457	8.53736	0.00379356
Siah1a	-0.226374	9.47929	0.0049421
Sema5b	-0.226328	8.12258	0.00291216
Gdf15	-0.226057	8.39395	0.000173113
Dctn2	-0.225916	11.7351	0.0269667
Ppapdc1	-0.225878	8.78054	2.07671e-05
5430416N02Rik	-0.225577	10.4715	0.00313268
4833441B18Rik	-0.225504	8.37748	0.00270373
Tm4sf6	-0.225424	8.51006	0.000408418
Rabl4	-0.225223	8.7829	0.00396877
6720427H10Rik	-0.225219	8.59898	0.00143723
1810021J13Rik	-0.225087	8.44643	0.000645489
Ppif	-0.225064	12.521	0.0308722
LOC382245	-0.224743	9.70811	0.0100528
Abr	-0.224567	8.29637	3.9828e-06
1190009E20Rik	-0.224241	8.90641	9.39677e-06
Dedd2	-0.224066	9.48964	0.00470129
4931417G12Rik	-0.223989	8.10149	1.93514e-05
Ndufb8	-0.223919	12.7029	0.0251577
5033414D02Rik	-0.223871	9.77145	0.00303632
1200009C21Rik	-0.223714	10.5892	0.0164772
Zcchc8	-0.223688	10.3437	2.32818e-05
Fnip1	-0.223414	10.0264	0.0452906
Skap2	-0.223009	11.5871	0.0206034
Pldn	-0.222891	9.59451	0.0295701
Zswim3	-0.222814	9.36743	0.000778682
Aatf	-0.222775	9.92993	0.000955695
Ppef2	-0.222661	8.33046	0.00191164
Hist1h2ak	-0.222169	14.7273	0.000372826
Ttc14	-0.222133	9.35613	0.00194241
Gzmm	-0.221946	8.38877	6.6429e-05
Sod1	-0.221515	12.7073	0.00126414
Zfyve20	-0.221335	9.08356	0.011508
2810001G20Rik	-0.221116	8.42497	0.00381346
Ube1x	-0.221101	11.728	0.000526973
Golga4	-0.221097	8.65612	0.0352734
Sui1-rs1	-0.221095	13.275	0.0117663
Nup54	-0.220929	9.01052	0.00237627
Nrarp	-0.220921	8.59035	0.000629632
C230096K16Rik	-0.220766	8.29531	7.65859e-05
Gtf3c4	-0.220651	9.08442	6.08758e-06
4432409B16	-0.220566	10.8498	0.000164455
Gapvd1	-0.220539	9.87452	2.93836e-05
2900060P06Rik	-0.220535	8.08235	0.00036002
Isy1	-0.220512	11.7044	0.000681912
BC023754	-0.220426	8.81995	0.0119133
4931407G18Rik	-0.220348	8.30001	0.00212726
1810037G04Rik	-0.220172	9.84357	0.00250471
Gnl2	-0.220142	9.9656	0.000775812
Scube3	-0.220012	8.59874	0.024601
Pkp3	-0.219824	8.4832	0.00363914
5730599I05Rik	-0.219629	11.2585	0.0223989
Prpf3	-0.219626	10.5588	0.0308925
C330027I04Rik	-0.219506	9.24618	0.000224551
Casp7	-0.219389	8.27137	0.00243534
1500010J02Rik	-0.21936	11.3434	0.00054899
C230067O06Rik	-0.219145	10.7484	0.00284455
Hsp105	-0.219037	11.0965	0.0124905
D17Wsu92e	-0.218879	10.0007	0.00228165
Cd79b	-0.218734	8.09948	4.97956e-05
Arhgap4	-0.218641	8.42266	0.000161573
1110018K11Rik	-0.218588	8.1881	0.000915082
2700083E18Rik	-0.218585	9.99943	0.00382037
6330444G18Rik	-0.218554	8.29164	0.000410947
2010007H12Rik	-0.218462	10.396	0.002696
Trit1	-0.218444	9.07566	7.52315e-05
Whrn	-0.218172	8.95135	0.00202011
1810037C20Rik	-0.218082	9.16992	0.00160144
Prkcsh	-0.218045	11.6491	0.00747394
LOC381825	-0.217843	8.6273	0.00189114
Rcor1	-0.217713	8.6831	0.0253565
Cox6a1	-0.217691	12.6177	0.00011671
Ralbp1	-0.217669	11.7968	0.0139323
Nadk	-0.217563	11.2826	0.00496255
Xpnpep1	-0.217428	11.2178	0.0018775
B4galnt2	-0.217423	8.22123	0.000568477
Isca1	-0.217304	9.79478	0.0128638
Gjb4	-0.217185	8.06617	0.000195308
LOC236427	-0.217162	8.03827	0.0223937
Ndufs3	-0.216824	11.3574	0.0466324
LOC238943	-0.216474	11.2884	0.0112424
Ap1s1	-0.216218	8.96708	0.00017168
Fbxo42	-0.216014	9.12427	6.71149e-05
Kntc1	-0.215987	11.4836	0.000233283
Acy1	-0.21582	9.92659	0.000587109
LOC239559	-0.215758	8.49482	0.00461392
Nudt8	-0.215698	9.18435	0.0166439
Cdyl2	-0.215675	9.24812	0.00155265
AV028368	-0.215349	8.89629	0.00658021
1500032D16Rik	-0.215329	12.2059	0.000510958
Casp6	-0.215141	8.98128	0.00561751
Chst10	-0.215016	8.12708	6.55972e-06
Anpep	-0.214676	8.12053	0.000980265
BC051080	-0.214665	8.71125	0.00141003
Umps	-0.214475	10.166	0.00095254
Bre	-0.214331	9.41455	0.0001004
2210401J11Rik	-0.214213	8.0567	4.48251e-05
Pcbp3	-0.21418	9.0182	0.00199977
Nfx1	-0.213745	8.85817	0.000383434
1700052O22Rik	-0.213715	8.86384	0.00442211
A630040A01Rik	-0.213665	9.00792	0.000136203
Prodh	-0.213616	8.91687	0.00140846
0910001L09Rik	-0.213106	11.8742	0.0151761
3110004H13Rik	-0.213023	9.39007	0.0174665
Qtrtd1	-0.212958	8.8472	0.00219787
LOC234987	-0.212897	11.0179	0.000975753
Lcmt1	-0.212596	10.7322	3.28361e-05
Ifitm5	-0.21243	8.11343	0.000656951
Ddef1	-0.21239	8.7727	2.7766e-05
Haghl	-0.212378	8.91219	0.033822
BC030863	-0.21233	8.30007	0.000778682
Upf2	-0.212318	11.5728	0.0230385
A630039F14Rik	-0.212268	8.99738	0.000409108
Mmp2	-0.212252	8.89182	0.0491685
D330027H18Rik	-0.212228	8.26905	1.58791e-05
2610007K22Rik	-0.212119	11.7996	0.00760256
Zc3h14	-0.211462	10.1366	0.000447779
LOC382087	-0.211326	9.61705	0.0147007
Sfrs4	-0.211271	11.3879	0.00258976
AA960436	-0.211208	9.55002	0.00315101
Casp2	-0.211124	9.96447	0.00256731
2310037I24Rik	-0.211056	10.4009	0.0106577
Prkcn	-0.210921	9.43614	0.000837684
3110050K21Rik	-0.21091	10.1644	0.0112396
Dok3	-0.21078	8.18521	3.38013e-06
6720485C15Rik	-0.21069	13.2921	0.00258361
Arl6ip2	-0.210687	9.41617	3.40025e-05
Sntb2	-0.210603	8.88315	0.000755496
B230312I18Rik	-0.210444	8.63614	0.0016754
D4Bwg1540e	-0.210431	8.18361	6.70678e-05
scl0002312.1_1	-0.210429	8.70155	0.0176733
5430426F23Rik	-0.210012	8.12162	0.000360805
9130416N05Rik	-0.209667	8.49256	0.0345785
Pps	-0.209598	9.19658	0.000825122
Eftud2	-0.209491	11.0158	0.000128022
1110019J04Rik	-0.209403	13.451	0.019225
E130104I10Rik	-0.209399	8.44945	0.000362528
BC033596	-0.209344	9.92869	0.00165353
LOC218696	-0.209339	8.65659	0.000268283
Txndc5	-0.209271	10.3136	0.011508
Dcps	-0.209092	10.5914	0.00290427
Dgcr6	-0.208888	9.27185	0.00705345
LOC383249	-0.208378	9.48461	0.0102777
Polg	-0.208274	8.51688	7.40491e-05
Cog4	-0.208221	9.12521	0.00785322
1810058I14Rik	-0.208031	9.69219	0.00318961
Mrpl36	-0.208005	12.0461	0.0138014
1300001I01Rik	-0.207889	8.79272	0.00418781
F830021D11Rik	-0.207876	8.80247	6.99776e-05
3230401I01Rik	-0.20782	9.59315	6.77337e-05
Mbc2	-0.207816	9.16052	6.7258e-06
Asns	-0.207805	12.9257	0.000974405
Nedd1	-0.207777	10.0773	0.00227494
KIF23	-0.207664	11.388	0.000571982
2810032E02Rik	-0.207606	8.38211	0.0154757
A730063M14Rik	-0.207484	9.21134	0.000195308
Luzp1	-0.207282	10.2289	0.0016762
scl0002337.1_39	-0.207075	9.23281	0.00572974
Bid	-0.206515	9.49719	0.0145902
Rhot1	-0.206479	11.3601	0.00316333
2010317E24Rik	-0.206475	10.0713	0.00617697
Gstk1	-0.206256	8.74374	0.0339516
Polrmt	-0.206245	11.1162	0.00047954
AU040829	-0.206214	9.63456	0.0155433
2810017I02Rik	-0.206118	10.4986	0.00538855
Dab2ip	-0.206006	9.29022	0.00667916
Psat1	-0.205903	13.4854	0.0310024
Jmjd1a	-0.205891	10.7332	0.0168825
2310002B06Rik	-0.205832	9.70614	0.00178609
Cidea	-0.20577	8.13902	0.00210009
Ube2d3	-0.205403	9.09605	0.00746321
Sesn1	-0.205386	9.1596	0.0127383
Acot8	-0.205377	9.39746	3.66823e-05
Akr7a5	-0.205349	10.6572	0.000572703
Myst2	-0.20523	10.2743	0.00790419
1190002J23Rik	-0.205058	8.20106	0.00209421
Rcl1	-0.204782	11.3739	0.00239743
Tada3l	-0.204729	8.53021	0.000127565
3200001K10Rik	-0.204535	8.18515	1.36672e-05
2310042L06Rik	-0.204529	9.10312	0.000191704
Gcn5l2	-0.204284	10.1784	0.0104729
Cyp4f13	-0.204246	9.42332	0.0021461
Plekhb1	-0.204236	8.48366	0.00260897
2310016M24Rik	-0.204215	11.8179	0.0143612
Catsper2	-0.204102	8.48908	0.00213318
Gtl7	-0.203773	9.34741	0.00270373
Itgb4	-0.203737	8.75944	0.00640826
Mybbp1a	-0.203614	10.67	0.00186323
Abtb1	-0.203424	9.54468	0.027109
Rutbc3	-0.203393	8.86473	0.00441267
Serf2	-0.203364	12.2194	0.000755496
Slc16a6	-0.203077	8.50671	3.70411e-06
LOC227384	-0.202955	10.5176	0.0235782
Hist1h2ah	-0.202893	14.4478	9.32903e-05
4732435K05Rik	-0.202721	8.76445	0.0233999
Prkcz	-0.202473	8.68892	0.000431814
Lamp2	-0.202424	9.69191	0.00197277
Furin	-0.202334	9.26426	0.0472194
Gm867	-0.202197	8.17539	0.000755496
Smc5l1	-0.202023	9.27515	0.000415236
Khk	-0.201918	8.61123	0.0082666
Abcb1b	-0.20182	8.89881	0.0128363
Psmb10	-0.201673	10.3733	0.03795
Atp9a	-0.201607	8.38692	0.000105893
Atp1a1	-0.200983	12.7899	0.0241897
Top2a	-0.200695	11.0375	0.00268932
2310003H01Rik	-0.20056	9.64124	0.00296298
4921511C04Rik	-0.20051	8.08666	0.00583092
6820406G21Rik	-0.200405	9.64658	0.0159441
Cbr1	-0.200368	9.4195	0.0100112
Ankrd25	-0.200091	8.82933	0.0460732
1700022C21Rik	-0.200076	8.83268	0.00957535
Slc16a9	-0.199898	8.40279	0.000656097
Mtvr2	-0.19989	8.46717	0.00258199
Gloxd1	-0.199874	8.65487	0.00226207
D15Wsu169e	-0.199774	9.00212	0.0270344
Hnrpa0	-0.199555	10.7839	0.012695
LOC333669	-0.199353	8.09535	0.000311409
C630002L24Rik	-0.199334	8.51203	0.00306815
Gtf2f1	-0.199229	9.78661	0.00244179
Rab4a	-0.199219	9.69248	0.00321927
Gm592	-0.199098	9.33335	0.0260488
Fkbp10	-0.198877	8.45396	0.0184741
Tst	-0.198744	8.33129	8.79284e-05
9630033F20Rik	-0.198663	8.21646	0.00041632
Vrk2	-0.198653	8.27749	6.736e-05
Gstm4	-0.198574	8.58795	0.00421924
P4ha2	-0.198533	8.60349	0.0425236
Nqo2	-0.198494	9.95462	0.00321971
B230209J16Rik	-0.19839	8.22625	0.000339711
LOC383899	-0.198229	8.80222	0.00130422
Fbxo16	-0.197999	8.25297	0.022636
Zfp248	-0.197989	8.26621	0.0227364
LOC238403	-0.197975	8.00383	0.00509322
B230323K17Rik	-0.19793	8.16663	0.0018775
9330186A19Rik	-0.197893	8.33553	0.00048367
Nradd	-0.197764	8.58523	0.0112824
Nasp	-0.197684	12.4564	0.0054053
Ttc19	-0.197592	9.14564	5.03554e-05
4932417I16Rik	-0.197489	9.46584	0.00287255
Mrps25	-0.19747	8.70639	6.46391e-05
Rad23b	-0.197373	9.7929	3.37395e-05
Zfp265	-0.197357	11.9674	0.013631
A730023M06Rik	-0.197219	8.83782	0.00769895
2310036I02Rik	-0.197066	8.71177	0.000206286
D130059O18Rik	-0.197021	8.80506	0.00159629
6230415M23Rik	-0.196946	9.17268	0.00344131
Snrp1c	-0.196671	9.6599	0.00328033
Hmgcl	-0.196577	10.0491	0.0259694
Mphosph1	-0.19654	10.0302	0.00662144
Psmd13	-0.19637	13.2959	0.0129944
Spata5l1	-0.196296	8.75673	0.00280152
9130223C08Rik	-0.196057	8.20791	0.0111567
Tnrc6c	-0.195572	9.28628	0.00432924
Pnpo	-0.195551	8.91196	8.91521e-05
Ppp2cz	-0.194943	8.62756	0.000714113
Cyb5r3	-0.194766	10.6755	0.0278834
9030625A04Rik	-0.194749	8.20585	0.000470777
A530030G15Rik	-0.194726	8.31266	0.00209421
Alas1	-0.194537	10.8781	0.00144262
Efs	-0.194501	9.93534	0.00830287
Abcf2	-0.194232	11.5916	0.000304547
Atp8a1	-0.193939	8.154	2.39174e-07
2810410M20Rik	-0.193774	12.9818	0.00149412
2310032D16Rik	-0.193494	8.77917	0.00225179
Ptcd2	-0.193416	8.88364	0.000355288
Prkcd	-0.193414	9.77298	0.0122682
Polg2	-0.193282	8.81973	0.000256486
Lonrf1	-0.193247	8.59648	0.010009
Smc1a	-0.193207	10.104	9.40026e-05
Gm169	-0.193196	10.0327	0.0458119
Cenpa	-0.193133	14.7041	0.00688805
Mxd3	-0.193086	8.18401	0.00142967
D10Bwg0940e	-0.193044	8.69667	0.0344746
Ctps	-0.192992	12.0656	0.0101645
Lyrm1	-0.192989	8.22916	0.00240461
Pik3c3	-0.192815	10.6465	0.00560829
AA673488	-0.19272	9.42561	0.00133278
BC018371	-0.192637	8.14695	0.000443743
Rnf134	-0.192617	11.5355	0.0332266
5730437N04Rik	-0.192607	11.2634	0.0120546
Fdxr	-0.192289	8.4437	3.74669e-05
Epb4.1l1	-0.192274	8.41117	0.0195205
Itgae	-0.191827	8.20991	0.000701296
Catnbip1	-0.191786	9.75423	0.00213596
9330102E08Rik	-0.191606	8.18003	0.000657683
B230333E16Rik	-0.191577	9.88954	0.0274849
1700025K23Rik	-0.191511	8.78943	0.00480128
9830143E02Rik	-0.19132	8.59633	0.010984
Rnaset2	-0.191034	11.5442	0.00839047
Ggta1	-0.190876	8.78449	0.0149626
2310005O14Rik	-0.190639	9.90452	0.00930073
Ubqln1	-0.19061	10.5301	0.00483648
2610203E10Rik	-0.190475	8.29812	0.000154573
Mobp	-0.190394	8.13972	0.000691984
Dido1	-0.190371	9.08673	0.00162958
Cirbp	-0.190212	9.49338	0.0114296
Btg4	-0.190119	8.31534	9.77413e-05
LOC328932	-0.190084	8.47175	0.000288522
Arid5b	-0.190082	9.56282	0.000343946
1600025D17Rik	-0.189565	8.52192	0.00735358
Tollip	-0.189444	9.62255	0.00032938
Gm484	-0.189327	8.4058	0.0062058
D0HXS9928E	-0.189252	9.94834	0.00180343
A930005H10Rik	-0.189242	8.38554	0.000535698
9830165L15Rik	-0.189063	8.82633	0.00453367
Keap1	-0.188945	9.43166	2.98712e-05
Psmd10	-0.188938	10.0656	0.00179701
Usp3	-0.188773	9.43199	0.00493187
9530058B02Rik	-0.1886	8.64675	0.000983296
D030041G07Rik	-0.188547	8.30207	0.00839467
Fgg	-0.188545	8.19818	0.000540293
Sirt4	-0.188323	8.91133	0.00261169
Agps	-0.188263	10.669	0.00017168
Mre11a	-0.188262	9.67108	0.00024452
Tbc1d2b	-0.187932	8.48483	0.00191116
Jak3	-0.187904	8.43011	0.00121037
Oact1	-0.187875	8.53944	0.00618696
Eif2b3	-0.18785	11.3412	0.0121162
Atp6a1	-0.187723	9.42593	0.0181925
Nsdhl	-0.187578	8.86148	0.00315101
Sgpp1	-0.187541	9.04694	0.00955779
AV312086	-0.187536	10.7531	0.0197683
6330580J24Rik	-0.187523	9.27402	0.00977728
Prdm14	-0.187407	8.10155	0.00158385
Pdgfb	-0.187182	8.32281	0.00101121
Ipp	-0.187178	8.81202	0.00419053
Mapbpip	-0.187029	9.41628	0.0266207
2310007F21Rik	-0.187012	9.7112	0.010248
Bmp7	-0.186922	8.15087	0.00502515
1700129I04Rik	-0.186857	8.51958	0.0113719
Aip	-0.186851	11.4264	0.0424364
Rae1	-0.186726	12.0507	0.00611806
Mrpl2	-0.186671	11.6255	0.0332266
Aacs	-0.186659	9.68327	0.0164991
Kif11	-0.186619	10.4872	0.0159488
Prpf18	-0.186558	10.5543	0.0130872
Syngr2	-0.186528	8.95394	0.00542376
LOC245828	-0.186308	10.7714	0.0233415
Ndufs7	-0.186248	12.6473	0.00888401
LOC381813	-0.186153	8.04215	0.00380001
Cxcl14	-0.186142	8.1018	0.0219095
Ubl4	-0.186052	9.9124	0.0154229
Tpcn2	-0.185848	8.31014	0.000338786
Rad51	-0.185791	9.56737	5.18877e-05
Carm1	-0.185763	9.48513	0.000587612
Mrpl40	-0.185749	11.9998	0.0342221
Cat	-0.185697	8.51294	0.00200663
1700095N21Rik	-0.185651	8.26563	0.00360663
Plcb3	-0.18536	9.06513	0.000496286
Coq6	-0.185151	10.2684	0.00368023
Tbc1d1	-0.185125	8.84863	0.000115288
Amt	-0.185106	8.27049	0.00427307
D8Ertd82e	-0.185073	8.27913	0.0125839
Nckipsd	-0.184997	8.75932	0.0271221
A930008A22Rik	-0.184956	8.69059	0.000169784
D030049N18Rik	-0.184718	8.76117	0.00119954
Cab39l	-0.184451	9.26141	0.0125456
Rab39	-0.184201	8.54801	0.000773107
1700016A15Rik	-0.183924	10.5435	0.000704682
Cox6b	-0.183518	13.4634	0.000852432
Cbs	-0.183353	8.40763	0.00563254
Myo1g	-0.183167	8.13157	0.00672431
1300010F03Rik	-0.182924	8.32878	1.18811e-06
Aspscr1	-0.182757	9.28869	0.000617034
C1qbp	-0.182708	12.5271	0.0380485
Dlg7	-0.182695	9.81834	0.00764818
Cd2	-0.18269	8.0366	8.43928e-05
Pold3	-0.182645	10.9124	0.00794778
Tekt1	-0.182593	8.05453	0.019613
Nup133	-0.182535	10.769	0.0212221
Zcchc6	-0.182499	9.91586	0.00182285
BC021917	-0.182439	8.63829	0.0197349
Trb	-0.182329	8.73414	0.00572859
Pex6	-0.182215	9.49593	0.000103783
D11Wsu47e	-0.182155	9.76886	0.00946344
2810025A12Rik	-0.182136	8.60693	0.00098905
BC065085	-0.182083	8.09673	0.0204062
Hagh	-0.18199	9.75055	0.0449968
2210039O17Rik	-0.181793	8.25073	0.00379356
Hist1h2ad	-0.181785	14.4524	0.00646699
Stat5a	-0.181661	8.14845	0.000506006
2510002D24Rik	-0.181349	8.32645	0.01741
Abcf1	-0.181187	11.3304	0.00107413
Btbd1	-0.18094	10.5611	0.0110325
Mapk8	-0.180925	8.60322	0.0054229
LOC380705	-0.180758	8.68099	0.0200322
Cox7a2	-0.180642	8.69207	0.0163397
Nde1	-0.180605	10.4833	7.40325e-05
As3mt	-0.18045	8.43684	0.00380759
Rab3ip	-0.179942	8.51423	0.000762477
Ei24	-0.179894	11.2227	0.0214055
EG624866	-0.179812	8.22377	0.000169078
Scye1	-0.179705	12.1742	0.0367085
2900036G02Rik	-0.179695	9.13629	0.0074666
A630098G22Rik	-0.179493	8.73186	0.0138989
Angptl4	-0.17946	9.02084	0.0280621
Gnb5	-0.179351	8.27533	0.000100347
1200014J11Rik	-0.179189	10.9009	0.00450932
Vti1a	-0.179085	8.49856	6.82486e-05
Pprc1	-0.179058	11.8381	0.000398017
Recc1	-0.17897	11.7347	0.00493187
5730593N15Rik	-0.17871	8.15061	0.000423835
2310045K21Rik	-0.178672	10.3829	0.00492051
B930007L02Rik	-0.178243	9.99667	0.00186637
2610510L01Rik	-0.178226	9.62427	0.00274038
4921532D18Rik	-0.17814	10.293	0.0492538
Tceb2	-0.178078	13.9999	0.000403702
9030409G11Rik	-0.177721	8.17987	1.21501e-05
Atp1b3	-0.177697	12.1756	0.0114811
scl0001333.1_125	-0.177584	8.11577	0.0253377
Acp1	-0.17749	9.50464	0.0146686
Pgam2	-0.177451	8.34887	0.00661166
Capn1	-0.177444	8.3763	0.00450932
AL033326	-0.177378	9.90506	0.00377665
ZBTB45	-0.177355	9.18501	0.00835842
D5Bwg0834e	-0.177335	10.1507	0.00483648
1110020M19Rik	-0.177333	8.89714	0.0360095
E430027N06Rik	-0.177287	11.3168	0.00301113
Grtp1	-0.177242	8.14884	8.06187e-05
Slk	-0.177202	9.55057	0.00192342
BC034076	-0.176872	8.02785	0.00377426
Pdlim4	-0.176727	8.29984	0.00580215
BC002163	-0.176666	11.5245	0.0177026
Hmbs	-0.176634	10.0944	0.0222883
Nnmt	-0.176225	8.13384	0.00470579
8430407G10Rik	-0.176067	8.28489	0.00992577
2310005N01Rik	-0.176018	8.77609	0.0381059
1190002A17Rik	-0.176016	8.34509	6.53319e-05
5730494M16Rik	-0.175977	8.71049	0.00713451
Spon2	-0.175969	8.17848	0.0251218
Mrpl34	-0.175893	10.9486	0.00416176
Mtrf1	-0.175672	8.81883	0.000386815
Lrrc28	-0.175671	9.22424	0.0148207
1700065O13Rik	-0.175531	8.65733	0.00218688
Pias4	-0.175331	10.4104	0.0117751
Rnf31	-0.175291	8.69668	0.0119004
1110008J03Rik	-0.175208	8.43029	2.09625e-05
1600023H17Rik	-0.175151	8.32488	0.00637366
Siah1b	-0.175136	9.47364	0.00158933
Stau1	-0.174941	9.89367	0.035457
Neil2	-0.174916	8.17503	0.000520856
Pacsin1	-0.174783	8.51263	0.000215242
Map3k6	-0.174737	8.40185	0.000748944
Txln	-0.174603	8.71409	0.00640379
6230416J20Rik	-0.17449	9.77594	0.0160824
2210021J22Rik	-0.174456	8.84112	0.00032364
Atp5h	-0.174032	13.2304	0.00277241
Sh3bgrl2	-0.173864	8.42246	0.00563254
Stambp	-0.173743	8.67736	0.00232625
Nup88	-0.173629	11.5442	0.00714237
Ppapdc2	-0.173554	8.26079	0.00202327
1810047K05Rik	-0.173517	8.43085	0.000412465
Ccrk	-0.173491	8.49876	2.85654e-05
2810025O06Rik	-0.173267	12.3282	0.0246264
Gtpbp1	-0.17321	9.42291	0.00516737
Ppp3cc	-0.173169	8.29345	0.00198636
2310014B11Rik	-0.172806	8.20101	0.00561932
Prc1	-0.172688	12.436	0.0187997
Mgat3	-0.172685	8.36548	0.0246832
Rpp30	-0.172582	10.4309	0.0127823
Naga	-0.172498	8.28605	0.0377312
Mtap	-0.172475	9.87669	0.00414875
2700007B13Rik	-0.172126	8.71124	0.00499138
Pxmp2	-0.17208	8.73599	0.0373585
4930579G24Rik	-0.171986	9.18203	0.0117776
Sat2	-0.171431	8.44926	0.00472839
Gcat	-0.171363	9.63972	0.0295525
Srfbp1	-0.171253	9.31409	0.000631657
LOC386067	-0.171031	12.9128	0.0299307
Nol9	-0.171029	8.23919	0.00100699
Lrrc57	-0.170957	9.31945	0.0443005
Abhd4	-0.170627	9.44487	0.0498863
Herc4	-0.170219	9.12497	0.00182315
9530090G24Rik	-0.170044	9.8009	0.0265099
Pop5	-0.170027	11.7392	0.0115433
LOC381151	-0.169974	8.0396	0.00175564
Mcam	-0.169952	8.90285	0.0389978
Snapc4	-0.16993	10.2213	0.0396387
Aabp3-pending	-0.169861	8.4791	0.0101804
1700028I16Rik	-0.169657	8.41369	0.0228376
LOC242642	-0.169593	8.24392	0.00442872
Vangl1	-0.169496	8.91445	0.0380197
Tnfrsf10b	-0.169423	8.23134	0.00100902
Peci	-0.16933	8.97147	0.0230575
Fjx1	-0.169181	8.35201	0.0241989
Hic2	-0.169085	10.7178	0.00742943
4930572J05Rik	-0.168895	9.8212	0.00770697
LOC382406	-0.168889	8.79653	0.00312496
Ubtd1	-0.168851	8.32066	0.0025708
Bzrpl1	-0.168796	8.01003	0.00024917
Snrpa	-0.168786	11.995	0.00526509
Stk22s1	-0.168703	8.05729	0.000279973
Cecr5	-0.168689	8.74451	0.000868139
4633402N23Rik	-0.16853	8.78346	0.0195748
Sumf2	-0.16837	9.06604	8.75996e-05
LOC385679	-0.168247	8.08859	0.00125857
scl0003723.1_3	-0.168101	8.43902	0.0131393
Ndufa9	-0.167759	12.661	0.0451163
LOC385493	-0.167699	8.14475	0.0201024
BC003324	-0.16766	8.38945	2.32905e-05
Papolg	-0.167643	10.2252	0.0087349
Hs1bp3	-0.167386	8.64391	0.00162617
Gpr20	-0.167195	8.19866	0.000746841
E430021A19Rik	-0.167152	8.41614	0.018744
Ihpk1	-0.166959	9.93107	0.0226008
6030448M23Rik	-0.1669	8.45435	0.001315
Osbpl6	-0.166857	8.27541	0.0406658
Ep400	-0.16663	10.9214	0.0222466
Atp6v0e2	-0.166622	8.25661	0.00102977
4732418C07Rik	-0.166478	8.9723	9.06945e-05
D19Bwg1357e	-0.166462	13.1538	0.0310024
Gm1070	-0.166252	8.15678	0.00347065
Gas2l3	-0.166034	9.26818	0.00509322
Khdrbs3	-0.165949	8.53766	0.00244277
Ng23	-0.165884	8.23402	0.00511789
2510003B16Rik	-0.165852	8.18121	0.000645385
Krt1-14	-0.165801	8.04621	0.0051419
Fkbp14	-0.165766	8.24358	0.00230348
5730494N06Rik	-0.165616	9.67748	0.0496832
Hspg2	-0.165587	10.6531	0.0320741
AI464131	-0.165557	8.21225	0.000760077
1810020C02Rik	-0.165531	8.18922	0.00122766
Trim28	-0.165452	14.1654	0.0320593
C130045I22Rik	-0.165259	8.29825	0.000382686
Sfrs3	-0.165218	10.1621	0.00464247
Rap1ga1	-0.165146	8.66898	0.0363891
LOC241621	-0.164955	13.2766	0.0258825
1200009O22Rik	-0.164917	8.09669	0.0278837
4921509E05Rik	-0.164835	8.57368	0.00193751
D130027M04Rik	-0.164813	8.28782	0.039278
Cutc	-0.16478	9.3127	0.00292183
Blmh	-0.164636	10.3141	0.0373585
Apob48r	-0.164583	8.36634	6.1817e-05
Mrps30	-0.164542	12.5824	0.0337221
Krt1-12	-0.164533	8.0304	1.04132e-05
Copg	-0.164384	9.18207	0.00279465
LOC381200	-0.164122	9.19402	0.0292189
Hn1l	-0.164106	10.982	0.0488934
Nsun5	-0.164069	9.11324	0.00186655
1500026D16Rik	-0.163941	8.67883	0.0137137
D14Ertd500e	-0.163702	8.45043	0.00731251
B230205C01Rik	-0.163694	8.7914	0.0011064
Pigf	-0.163579	11.3378	0.0210994
Thop1	-0.163456	10.7055	0.0217267
Lsm12	-0.163445	10.4292	0.0324442
Dci	-0.163298	10.5395	0.0149567
BC025833	-0.163272	8.81342	0.00595649
Usp2	-0.163221	8.38181	0.00104516
D130060L11Rik	-0.163202	8.8969	0.00449187
Prnpip1	-0.163186	9.10509	0.00175243
Rfc2	-0.163135	11.527	0.00303278
A230058N16Rik	-0.162887	8.49901	0.0142739
2410003K15Rik	-0.162794	10.7127	0.0163555
5330408N05Rik	-0.162677	8.51522	7.1662e-05
B230317C12Rik	-0.162597	8.61662	0.00775905
Itga5	-0.162595	8.68968	0.00183867
2500002A22Rik	-0.162491	9.15175	0.0307191
Cdc25c	-0.162458	8.9255	0.0113199
LOC227393	-0.16244	8.58117	0.00114656
Amdhd2	-0.162323	9.27497	0.0375585
1700027N10Rik	-0.162209	8.12689	0.000807536
3110001O07Rik	-0.162204	8.79141	0.0110793
3110040N11Rik	-0.162174	9.03576	0.00367274
Sin3a	-0.162064	11.2148	0.0261246
Lamb2	-0.162008	8.63202	0.0083168
BC021614	-0.161955	8.30183	0.00407578
Wdr68	-0.161944	11.6095	0.0280355
1110004P21Rik	-0.161904	9.5935	0.0431464
B230341C02Rik	-0.161856	8.19468	0.0156002
LOC212728	-0.161556	8.09388	0.00414875
Nln	-0.16141	9.13017	0.000158751
Hcph	-0.161391	9.19976	0.00251096
Hdac10	-0.161309	8.09239	0.000105114
Cyc1	-0.16129	12.6505	0.0144334
Eif3s8	-0.161125	10.5876	0.0433625
Chn2	-0.161102	8.18707	0.000575328
Etsrp71	-0.160948	8.85319	0.012862
Gcn1l1	-0.160777	8.67225	0.0163751
Clra	-0.160598	8.52799	0.0106546
Jtv1	-0.160594	10.4139	0.0114811
1110034G24Rik	-0.160454	8.32096	0.00609033
Actn4	-0.16043	11.1318	0.0330809
2310016C08Rik	-0.160333	9.46449	0.0330883
Bat3	-0.160329	10.4231	0.0186477
2410004L22Rik	-0.160199	9.78461	0.012759
Psma4	-0.159799	13.9356	0.0210994
DXImx40e	-0.159755	9.69318	0.0155129
Isgf3g	-0.159679	8.64417	0.00121086
[truncated: 2,855 more rows]

## Sheet: Setdb1 microarray DAY 6 p<0.05
GENE SYMBOL	logFC	AveExpr	adj.P.Val
Lrrc34	-4.0675	11.5816	8.76463e-22
Trh	-3.97032	11.8596	6.11159e-15
Krt42	-3.10675	10.4768	2.34443e-15
Gpx2	-3.08194	10.4822	2.62331e-06
Esrrb	-3.06885	12.8735	1.25374e-20
Laptm5	-2.95945	11.705	9.92744e-15
Nupr1	-2.86991	11.5401	6.43759e-17
2410039E07Rik	-2.56757	9.81528	6.17855e-15
Ifitm1	-2.53263	11.9543	1.25714e-13
Nanog	-2.50178	11.7211	2.64087e-16
Upp1	-2.47576	13.5064	3.05357e-17
Socs3	-2.40384	11.6974	8.35748e-15
AI427138	-2.38864	11.78	2.76851e-10
LOC208080	-2.33727	10.5114	4.75261e-19
Gjb3	-2.33301	11.3132	1.01092e-17
Myo1f	-2.3274	9.57607	2.48289e-10
Capn5	-2.28133	10.7466	5.36305e-18
Sgk	-2.2614	13.5445	6.03697e-09
2410004A20Rik	-2.25526	9.78782	2.59387e-11
Gfpt2	-2.22731	10.406	1.03641e-19
1190002H23Rik	-2.21518	9.98159	1.73297e-12
LOC381140	-2.20422	10.104	9.67464e-11
Bhlhb2	-2.18085	9.88671	1.18067e-11
Cxxc6	-2.09443	12.4389	2.78797e-18
Eras	-2.05588	11.0262	7.11236e-18
4930583H14Rik	-2.03938	11.0785	8.60893e-14
Lama1	-2.02859	9.59284	1.97356e-13
Itpk1	-2.01967	11.1046	5.29771e-15
Tcfcp2l1	-1.9929	11.9889	1.86842e-07
Tcl1	-1.93305	9.46459	1.20364e-15
Mreg	-1.93096	11.7187	2.9812e-12
Fgf4	-1.91745	9.77379	2.33954e-16
Kdelr3	-1.91598	10.2993	1.22219e-11
Mylpf	-1.90902	11.4588	3.26326e-14
8430410A17Rik	-1.90614	10.2705	1.69427e-11
Serpinb6c	-1.90384	9.62337	3.2124e-10
2210415K03Rik	-1.88886	9.81596	1.05225e-10
Klf4	-1.87941	9.51192	1.82585e-16
Mybl2	-1.86121	11.4296	8.87669e-19
Acas2l	-1.85953	9.78588	3.4855e-15
Ifitm2	-1.84917	13.4427	1.4814e-16
2410146L05Rik	-1.84158	13.6366	6.6289e-16
Fbxo15	-1.8262	12.4493	3.39171e-16
Myl4	-1.82489	9.29973	6.54304e-15
Tsga2	-1.81338	9.60509	2.27124e-18
Porcn	-1.80191	9.64836	1.11282e-19
Igfbp2	-1.79286	11.978	1.46789e-07
Manba	-1.79226	12.0804	6.19455e-14
Gli2	-1.78444	9.45141	3.54141e-05
Pgm2	-1.77712	12.5905	1.0018e-17
Tnfsf13	-1.77674	9.76961	3.36041e-17
1190003J15Rik	-1.75491	10.7351	2.03799e-14
Olig1	-1.74679	11.6448	1.00271e-14
Krt1-17	-1.74608	9.32214	3.64364e-08
Rfx2	-1.73987	10.8221	7.73765e-15
Ldh2	-1.73029	12.5333	1.01878e-12
Rab27a	-1.72455	10.4256	3.2394e-16
Gna14	-1.70712	9.08542	1.51124e-05
Gababrbp	-1.68919	9.57204	1.47883e-15
Ndg2	-1.68849	14.7111	1.25807e-17
Fblim1	-1.653	12.2316	1.32584e-07
Tbc1d13	-1.64048	11.9263	1.93016e-10
Pcyt1b	-1.63941	9.83084	1.79148e-13
BC032203	-1.63269	11.7265	4.36845e-15
D130058I21Rik	-1.6262	9.93406	7.76912e-12
Slc29a1	-1.6164	10.4558	4.42377e-18
Tcf15	-1.60506	9.79713	1.09451e-09
Dnajc6	-1.60171	9.56144	1.08654e-07
C330008K14Rik	-1.57976	9.51862	1.52263e-16
Txnip	-1.56377	12.238	4.86225e-19
Sept1	-1.56052	9.65745	1.18535e-09
Usp28	-1.55538	10.9625	9.48151e-09
Pou5f1	-1.54795	13.2584	1.41738e-14
Sfrp1	-1.52266	9.29179	1.36374e-10
Apobec3	-1.5189	9.27019	3.61285e-19
Spp1	-1.51434	12.0813	2.4725e-12
Hk2	-1.4983	13.9548	9.27932e-16
LOC381889	-1.49388	10.5871	8.50035e-16
Gbx2	-1.48135	11.4799	1.35228e-05
2210008I11Rik	-1.47948	10.9754	1.05296e-12
Klf2	-1.47398	11.5028	1.40235e-17
Tex14	-1.4498	10.4702	7.02336e-14
E130014J05Rik	-1.44955	9.35013	7.75582e-18
5430425C04Rik	-1.4477	9.34493	1.1569e-09
Plac8	-1.44727	9.23068	0.00132277
4931431C02Rik	-1.44168	11.8221	1.18017e-14
Sox2	-1.43716	10.534	6.00614e-17
Pold2	-1.43545	11.2408	9.08387e-15
Fkbp5	-1.42807	10.4777	1.54838e-18
Csrp2	-1.41716	13.3996	9.44862e-12
AW046396	-1.41507	9.87489	5.38311e-10
D14Ertd668e	-1.40752	9.62377	3.44942e-11
C230070D10Rik	-1.40703	9.97471	9.27932e-16
Etv4	-1.40492	10.3476	3.02707e-10
Ly6g6e	-1.39694	9.24878	1.86868e-15
D230005D02Rik	-1.38274	10.3315	2.32827e-09
Aire	-1.38106	9.45048	2.01512e-10
Ifitm3	-1.38004	13.4395	4.01989e-13
D11Ertd636e	-1.37153	9.73658	1.00268e-12
LOC226017	-1.36894	10.1706	6.13042e-12
2410116G06Rik	-1.36886	11.8652	4.42247e-14
3100002J23Rik	-1.35312	9.00147	3.86256e-09
AA467197	-1.34278	9.54421	8.80985e-15
2610033C09Rik	-1.3354	12.4787	4.51601e-15
Cobl	-1.33363	9.00547	1.56143e-18
Egln3	-1.32851	8.81009	4.48334e-17
Ptk9l	-1.31992	11.0148	3.45797e-08
Ndrl	-1.31567	8.96743	5.58375e-15
LOC381269	-1.31065	9.69638	1.1645e-10
Calca	-1.30394	9.2729	1.28485e-15
LOC381914	-1.29726	9.65448	1.84694e-13
Nphs1	-1.29602	9.24214	9.1601e-06
Osgep	-1.29381	11.6192	4.82716e-12
BC004728	-1.28149	10.2156	8.45356e-11
Sh3gl2	-1.28115	9.85699	4.24613e-07
Parp1	-1.27614	12.6603	9.7455e-09
AI850995	-1.27392	9.23687	7.88308e-08
Igfals	-1.27313	9.3245	3.98468e-18
Tcfap2c	-1.27313	11.401	6.54459e-15
1500032D16Rik	-1.27285	12.2059	2.15973e-17
9930116P15Rik	-1.2609	11.654	2.09088e-14
Gm2a	-1.25693	10.4679	3.35003e-12
6330534C20Rik	-1.25482	9.37612	7.13854e-14
1700037H04Rik	-1.24922	12.2185	1.04866e-12
Nptx2	-1.23925	9.83814	6.08261e-08
Sap30	-1.2373	13.6037	2.43223e-13
Helb	-1.22979	11.2061	1.83345e-17
4930538D17Rik	-1.22657	10.5306	2.40353e-12
Aim1l	-1.22412	9.52137	3.91053e-16
C330005L02Rik	-1.22239	10.1182	4.66487e-14
Inhbb	-1.22079	8.91847	0.000141976
2700038C09Rik	-1.21787	10.1814	7.32883e-13
Anp32a	-1.21312	10.2778	1.99678e-15
Slc28a1	-1.21241	9.67994	9.2532e-11
Ankrd35	-1.20971	8.88235	1.00271e-14
4930504E06Rik	-1.20638	10.4472	2.63035e-09
E2f1	-1.20582	11.351	4.72166e-12
3110013H01Rik	-1.20484	11.9446	2.4369e-12
Arrdc4	-1.20435	12.0785	5.24589e-11
Rad51c	-1.20379	9.9206	2.97469e-14
Pald	-1.20276	11.1372	8.91512e-11
Sod2	-1.2024	12.9122	3.58865e-13
8030459N02Rik	-1.2022	11.8095	1.1607e-17
Pde1b	-1.20191	9.73955	3.56683e-12
Shmt1	-1.20183	10.3702	1.9362e-17
Prps1	-1.19861	11.8427	1.5826e-13
Sirt3	-1.19451	9.8756	1.40616e-14
F830002E14Rik	-1.19427	8.63891	0.000151553
Alpk3	-1.16828	9.04849	1.1488e-09
0610012D17Rik	-1.16752	11.1847	2.36105e-15
Pgc	-1.16556	8.92745	1.60016e-16
Spats1	-1.16323	9.13229	2.25987e-10
Impa2	-1.16247	9.96632	1.82654e-16
H2afy	-1.15659	11.8992	1.63544e-13
Add3	-1.1529	9.9647	1.84812e-15
Ppargc1b	-1.14464	9.2258	5.70187e-13
1700019N12Rik	-1.14426	9.2591	3.06749e-14
Utf1	-1.1435	11.5166	1.89142e-10
Pfkl	-1.13931	12.4838	4.70786e-08
Crtac1	-1.13491	8.83879	8.62949e-09
D15Ertd366e	-1.13064	10.1843	6.79729e-13
Dhrs6	-1.12925	9.30398	1.14343e-13
Tulp2	-1.12759	9.57937	9.77643e-12
0610039J04Rik	-1.12736	11.2384	2.01236e-15
Kit	-1.12687	9.26058	2.89238e-09
Scd1	-1.12431	9.77413	5.60426e-10
Kcnk5	-1.12386	9.49282	4.50459e-15
Ulk1	-1.11809	10.2041	1.84812e-15
BC006933	-1.11626	10.323	1.30467e-17
Tbx3	-1.11578	9.34087	3.40075e-05
Itpr1	-1.11452	10.4245	1.04886e-15
A130092J06Rik	-1.10857	9.00931	1.3631e-06
Slc25a39	-1.1036	10.3212	2.29846e-14
Tdh	-1.10239	9.67819	1.09933e-08
Phc1	-1.09824	12.1586	1.01104e-12
Ak4	-1.09784	9.81262	6.27274e-09
Msc	-1.09325	9.29694	1.41287e-05
2410072D24Rik	-1.09305	9.62768	6.701e-14
C86302	-1.0914	11.5245	1.4161e-10
Gstm1	-1.08963	9.165	1.04793e-07
Tfrc	-1.08942	12.4042	1.40323e-13
Igf2bp2	-1.08664	12.0377	1.44666e-06
Clcnkb	-1.08643	9.65735	6.18112e-13
C330034C07Rik	-1.08233	10.0737	3.90946e-06
Zfp57	-1.08079	10.1064	3.34093e-08
1700021F05Rik	-1.08066	12.1971	6.06277e-09
A230050P20Rik	-1.08031	10.0331	2.43772e-10
Gstm2	-1.07885	10.8262	0.000514868
Apoa2	-1.0787	10.5296	5.26838e-05
9630046K23Rik	-1.07173	11.6979	1.16779e-10
4933405K07Rik	-1.06992	9.40689	6.17017e-11
Pga5	-1.06593	8.72385	0.000332021
Ift52	-1.06433	11.011	3.7053e-10
Pla2g1b	-1.06321	12.4293	8.61704e-11
Senp3	-1.06141	12.8368	8.86399e-10
1700061G19Rik	-1.05979	9.53879	1.05349e-10
Aldoa	-1.0586	13.8927	1.00361e-10
Nipsnap1	-1.05579	11.2205	1.77538e-11
Mtap7	-1.05507	9.99773	1.0833e-11
Gpi1	-1.05366	12.0802	2.51523e-15
Gsta4	-1.05357	12.5236	2.06405e-13
Frat2	-1.05328	9.23272	1.13807e-15
2200001I15Rik	-1.05214	9.11579	6.01009e-07
Liph	-1.0501	10.3056	2.47673e-06
Qdpr	-1.0453	10.42	8.57252e-13
Cplx1	-1.04123	8.85035	1.85944e-09
Elf3	-1.04111	8.88748	1.34072e-06
A130038J17Rik	-1.03573	8.82403	1.12534e-08
Camta1	-1.03479	9.99368	9.93209e-12
D6Wsu176e	-1.03344	10.6298	2.37331e-13
D030012E24Rik	-1.03263	9.44952	5.04674e-18
BC052040	-1.03061	10.5402	9.39836e-16
Ndrg1	-1.03032	8.71368	9.00789e-12
Akp2	-1.02122	10.122	2.28006e-12
Chaf1b	-1.01755	11.763	1.83343e-14
Aldh18a1	-1.01611	10.3827	2.05267e-14
Cdc5l	-1.01519	11.8453	5.29771e-15
Map4k1	-1.0123	10.0634	1.28421e-07
Skap2	-1.01179	11.5871	2.6639e-11
Ldh1	-1.00827	14.9172	3.70384e-12
Inpp5d	-1.00471	8.82921	8.96192e-06
2410137M14Rik	-1.00304	8.86287	2.07251e-11
Renbp	-1.00287	10.7539	3.90409e-12
2310005L22Rik	-1.00276	11.0493	7.29027e-09
Mia1	-1.0003	8.86353	6.13271e-10
Itgb7	-0.992815	8.75176	1.06081e-11
Gnpda1	-0.991858	10.806	2.34425e-14
Dpp4	-0.991568	8.85411	0.00281322
Erdr1	-0.990436	12.6233	0.00337877
Aes	-0.988297	9.15727	8.63399e-09
AI449441	-0.988104	10.2885	9.30012e-10
Hibadh	-0.986742	13.0357	2.21596e-06
Jmjd1a	-0.984541	10.7332	5.34631e-12
Chrna9	-0.983749	8.85682	3.51209e-12
Arl3	-0.982137	10.1611	5.73439e-16
5930412E23Rik	-0.980767	10.5848	0.000473915
9130417I07Rik	-0.979433	8.54293	3.43877e-06
Ivns1abp	-0.976648	10.4982	0.000273541
C130033B18Rik	-0.975908	10.0942	1.93806e-05
Jmjd2b	-0.973691	9.52529	2.60726e-12
Sema4a	-0.972704	9.25009	1.60554e-07
2310079N02Rik	-0.970089	9.74356	7.04259e-10
Mapbpip-pending	-0.969757	10.3846	4.80764e-09
D11Ertd759e	-0.965345	9.53011	1.15765e-10
Ssbp4	-0.963576	10.2372	8.29199e-11
2410008K03Rik	-0.959647	10.8637	0.000560007
1110030K22Rik	-0.959046	9.08158	9.73007e-10
Setd6	-0.957804	10.5752	9.60087e-14
Dcun1d4	-0.95608	9.07764	6.03587e-11
Cds1	-0.95448	9.73774	1.10686e-07
1110058L19Rik	-0.950712	11.1604	1.35842e-06
Gpt2	-0.949735	9.96945	2.28925e-10
Tbl2	-0.948793	9.44795	3.02775e-15
Ruvbl2	-0.947846	12.3044	4.60812e-14
Tle4	-0.947265	10.9809	3.85489e-10
Gm129	-0.942947	9.38473	1.12466e-11
Phlda2	-0.940855	11.6265	2.77658e-10
Bzw2	-0.93789	12.4504	1.71588e-13
Sema4b	-0.937436	10.9904	6.76239e-12
1810037I17Rik	-0.936539	13.5053	3.66969e-05
Fgf17	-0.936516	8.75232	3.21808e-16
BC037708	-0.935177	10.5736	4.6698e-11
Bcl3	-0.934222	8.94635	3.93233e-11
5430400N05Rik	-0.933517	10.4526	1.96155e-08
Ppp1r3c	-0.932985	8.43373	1.78342e-07
5730438N18Rik	-0.9329	10.3911	9.07956e-14
A930005G04Rik	-0.932282	10.126	5.31793e-12
D16Bwg1494e	-0.929886	8.9717	4.68356e-06
Narg1l	-0.927801	9.71302	1.71025e-14
Abca7	-0.926824	9.4126	6.608e-05
Fzd7	-0.926382	10.0436	7.50316e-07
Gprasp2	-0.924623	10.0672	1.84825e-11
Sult4a1	-0.923632	11.6034	2.56292e-11
LOC231663	-0.921369	8.81127	2.43424e-07
Bub1b	-0.917207	11.7132	1.21194e-13
Them2	-0.916311	11.4987	4.90991e-09
5730599I05Rik	-0.913791	11.2585	1.63521e-10
Pcolce	-0.912114	9.9007	9.22819e-07
1700019D03Rik	-0.909994	11.8633	0.00500717
1810027O10Rik	-0.909718	11.9431	1.38072e-13
Vars2l	-0.906359	9.95039	2.35245e-11
Uck2	-0.906302	12.5394	2.82394e-06
Acaa1	-0.903355	11.6393	5.37696e-09
Hap1	-0.90314	9.02335	1.11989e-17
Rpap1	-0.902445	9.79343	4.47777e-13
LOC383897	-0.90135	11.0311	3.72885e-13
Wdfy1	-0.900592	9.95203	0.000670549
Pecam1	-0.899687	9.20298	6.55674e-12
Aard	-0.898854	10.4285	2.29123e-10
scl0001709.1_980	-0.897694	12.1721	3.31923e-09
2810025M15Rik	-0.897394	12.9688	9.7416e-06
Psat1	-0.895003	13.4854	2.11903e-10
Aplp1	-0.894397	8.96901	4.69119e-10
2610207P08Rik	-0.893636	11.2734	1.37416e-14
Setdb1	-0.892848	9.14036	4.29741e-15
Zswim1	-0.892578	10.8875	5.24763e-05
Zfp261	-0.892047	9.31554	3.26134e-15
AI450540	-0.890893	10.5353	2.43242e-13
Nxn	-0.890225	11.2667	0.00145725
Unc84a	-0.888346	10.3155	1.58961e-11
Ankrd47	-0.887023	9.97735	4.7729e-06
Aoah	-0.886288	8.87308	7.48458e-07
6330414G02Rik	-0.884969	11.0898	1.65683e-07
Dap3	-0.883669	12.6823	2.42775e-11
D16Ertd472e	-0.882878	9.83417	3.77959e-10
Fgd1	-0.882722	10.4576	4.39102e-06
Rpp25	-0.879573	12.1127	1.60022e-08
Qprt	-0.878967	8.9053	3.65595e-06
Znrd1	-0.878909	11.4992	3.66322e-11
Grasp	-0.878441	9.07835	5.12688e-14
Chchd6	-0.877141	9.61508	4.27477e-12
Pola2	-0.875753	10.6504	3.82392e-13
Hal	-0.875112	8.62836	0.00101589
Gadd45a	-0.873743	11.791	1.42601e-08
Fn1	-0.871437	9.70815	0.00122719
Tubb2b	-0.871051	11.9567	9.77643e-12
Sgol2	-0.869594	11.759	1.35194e-07
Cdca7	-0.869089	13.6086	2.57207e-10
Myst4	-0.868956	10.025	5.17146e-09
Echdc2	-0.86525	10.6721	2.53494e-10
Rab39	-0.865019	8.54801	4.42106e-15
Zic3	-0.864631	10.7241	1.82111e-09
LOC381105	-0.863566	8.42757	6.94919e-14
Slc6a6	-0.861239	11.3789	3.5658e-10
Rnaseh2a	-0.861218	10.1964	1.87937e-09
LOC243823	-0.859205	8.6885	4.6371e-05
Plekha4	-0.858864	9.75189	0.0116512
Stmn2	-0.858146	11.6398	1.75194e-07
Tpd52	-0.857951	12.4114	3.74598e-10
Rps6kl1	-0.856604	9.03751	6.84552e-10
Pdzk1	-0.853755	8.67227	1.35035e-08
Cdca2	-0.853061	11.9491	3.89923e-14
Spry4	-0.85209	8.84473	9.09811e-09
Immp2l	-0.851949	9.58315	1.19074e-08
E430026C09Rik	-0.850521	10.933	2.39049e-13
Hnrpdl	-0.848954	10.2976	1.0011e-13
Zfp459	-0.848927	9.11386	8.11214e-10
1700007J06Rik	-0.848584	8.55365	1.32644e-10
Mt3	-0.848326	8.91194	2.85248e-08
Spc24	-0.847423	9.92441	6.10754e-08
Poli	-0.845834	9.65679	1.0019e-11
Arl6	-0.845526	10.0515	2.86666e-10
Gm1631	-0.845396	8.56123	1.06124e-06
5330401P04Rik	-0.845151	9.41339	1.28898e-05
A930010I20Rik	-0.844535	9.69192	3.57812e-13
Rpl3l	-0.844492	8.92894	2.05688e-13
Neurl	-0.843301	9.30905	4.05897e-09
Etfb	-0.843195	11.8148	6.24261e-13
E130102H24Rik	-0.841934	9.63541	4.37083e-08
Hrb	-0.838695	10.9927	0.000348633
D130003B22Rik	-0.833948	8.74775	7.14059e-10
5430406J06Rik	-0.833329	10.6986	3.06801e-07
BC013481	-0.830623	9.26995	2.47762e-07
Pk3	-0.830611	9.37171	3.57634e-07
Impdh2	-0.830465	13.8681	8.12722e-12
Cryzl1	-0.830097	10.7377	6.55262e-11
4930563B10Rik	-0.829351	9.7788	5.90017e-10
2610034N24Rik	-0.827556	11.8792	6.50772e-11
Mthfd2	-0.827322	11.889	2.08037e-08
Hsd3b7	-0.826319	9.90907	0.00011398
Kntc1	-0.824907	11.4836	2.58113e-14
Bcap29	-0.824086	10.6706	3.75846e-12
Aldh2	-0.821716	12.1387	2.22797e-06
9630048M01Rik	-0.821666	8.66945	5.6345e-09
A230062G08Rik	-0.818111	9.9966	7.63358e-08
Cbr3	-0.818069	10.1556	0.00150079
Gm691	-0.817506	8.68797	5.07471e-07
Cd68	-0.817453	9.4275	2.04412e-10
Sfrs7	-0.815447	11.8759	4.11035e-10
Trf	-0.814636	8.79249	9.56662e-05
1110006G06Rik	-0.811073	9.88922	7.61765e-10
Mrpl15	-0.809681	11.6521	6.81333e-06
Zranb3	-0.809538	10.8537	1.85987e-05
Rangnrf	-0.809232	11.2568	1.37806e-10
Slc25a19	-0.808687	9.57906	2.0135e-13
1110001N06Rik	-0.807444	10.632	1.51323e-09
scl000048.1_50_REVCOMP	-0.806812	10.0012	1.48533e-08
H2-Ke6	-0.806229	10.4782	2.14598e-10
St3gal3	-0.805651	9.54436	3.61923e-11
Pitpnc1	-0.800977	8.98627	3.91037e-09
4930519N13Rik	-0.800191	9.34832	3.48046e-05
Nqo2	-0.799804	9.95462	1.74397e-12
Gm561	-0.798316	9.81745	2.67574e-09
Rad54l	-0.795408	10.1533	4.32724e-12
2700049A03Rik	-0.794038	10.0721	2.67061e-13
Sox15	-0.792677	8.89669	2.74491e-11
Tk1	-0.791588	9.37027	1.61595e-12
D1Ertd161e	-0.790144	9.33882	1.15031e-06
LOC229665	-0.789796	8.66978	2.65908e-11
Lck	-0.789471	9.96217	8.6774e-09
6820424L24Rik	-0.789366	11.5074	1.91565e-07
Snag1	-0.789319	11.2061	2.67685e-10
1110036I07Rik	-0.787892	10.2621	2.47762e-07
Slc25a12	-0.787757	8.83477	1.58258e-08
LOC383491	-0.786651	8.47184	2.45015e-07
Exosc5	-0.786184	10.8598	8.54121e-11
Stat3	-0.78499	9.71616	2.72139e-07
2810410M20Rik	-0.784427	12.9818	2.8463e-13
Mov10	-0.783455	8.92141	2.29156e-11
Tcea2	-0.782521	9.2011	1.27959e-06
Paox	-0.782216	10.9789	5.71524e-08
A630097D09Rik	-0.779652	9.62576	1.78609e-12
Pla2g10	-0.777456	10.3068	0.00239459
Cklfsf6	-0.776757	9.91357	4.48879e-10
Nr5a2	-0.775724	8.71494	0.000348721
Vegfc	-0.775395	9.03631	6.11792e-09
Pem	-0.775082	10.9035	5.63467e-06
Jarid1b	-0.775037	10.943	7.9168e-06
2600009P04Rik	-0.774481	9.04407	2.3517e-05
Galk1	-0.773984	11.9023	7.20376e-13
Pdk1	-0.773815	11.2784	5.65751e-07
LOC381865	-0.773668	13.2395	2.27253e-10
2410078J06Rik	-0.772843	9.37393	1.39778e-05
B830028P19Rik	-0.771976	8.83436	1.62383e-10
4932417I16Rik	-0.771893	9.46584	2.42064e-12
4732436F15Rik	-0.771647	8.51734	6.39673e-14
Grhpr	-0.770835	11.058	2.89354e-14
Ttf2	-0.770282	10.661	5.27887e-12
1190002F15Rik	-0.769532	9.07503	8.98229e-09
2810485I05Rik	-0.769198	11.3966	4.47244e-10
BC008171	-0.767809	9.2315	6.81125e-11
Socs2	-0.767079	12.5817	1.81847e-06
Pkm2	-0.766218	13.982	4.9815e-12
Cdc42ep4	-0.765927	10.1828	0.000191807
Shmt2	-0.765199	9.87172	1.5022e-11
1600014C23Rik	-0.764598	8.40933	1.50032e-12
Angptl4	-0.763806	9.02084	2.22775e-10
Trak1	-0.763038	9.15547	1.76979e-09
Dlc1	-0.762206	8.85175	1.54499e-07
Gdf3	-0.76115	11.8544	1.94856e-10
Ggnbp1	-0.761078	8.99997	7.29339e-10
A230013K13Rik	-0.760366	9.05533	9.46064e-11
LOC381591	-0.760364	12.9351	1.31758e-10
Pold3	-0.757576	10.9124	9.25509e-12
Lzf	-0.757107	9.45187	3.11402e-08
Mcm3	-0.756971	11.0321	0.00149766
C030026E19Rik	-0.756865	11.0031	1.60737e-12
Insig1	-0.756605	9.18138	4.2881e-14
LOC382127	-0.756135	12.9945	5.51726e-10
BC006705	-0.755884	11.223	1.46799e-09
Ppp2r5c	-0.755803	10.3078	1.11794e-13
E230002P03Rik	-0.752267	8.42648	3.76161e-11
Bckdhb	-0.751794	9.28359	6.17401e-09
Trim26	-0.750868	10.9285	2.83326e-08
Ccs	-0.750005	11.3213	2.21233e-10
2310003L22Rik	-0.749285	9.01047	2.97557e-15
AI842788	-0.748921	10.2615	1.83038e-08
2310045B01Rik	-0.748638	9.87386	3.92145e-07
6030495B01Rik	-0.748623	8.66366	0.00171619
Mrps16	-0.74623	11.053	1.13468e-11
D130083G05Rik	-0.745914	10.812	1.74567e-05
Ung	-0.745475	10.2861	4.72314e-12
Arih2	-0.74494	11.667	1.35454e-10
Ecsit	-0.744398	10.077	7.9932e-06
1500001M20Rik	-0.744374	10.7938	7.4585e-13
Rpa1	-0.743754	13.589	2.13064e-12
9130422G05Rik	-0.742809	9.69045	1.02017e-14
2010009J12Rik	-0.742394	11.004	1.8881e-05
Acy1	-0.741175	9.92659	1.05822e-12
Acn9	-0.741141	9.34387	7.62912e-13
Mast3	-0.740316	9.56884	3.63307e-09
Blm	-0.740275	10.9482	7.73897e-16
Tex9	-0.739395	10.3323	8.90284e-10
Adprtl2	-0.737148	11.4341	9.64037e-14
Map3k1	-0.736325	11.349	7.10752e-13
6820402O20Rik	-0.735844	10.4215	7.70536e-11
2010317E24Rik	-0.73506	10.0713	8.18348e-11
Crlf3	-0.734706	10.8382	1.70281e-11
Sfxn1	-0.73395	12.6317	9.57633e-13
Niban	-0.733132	9.10952	1.22219e-11
AV340375	-0.732966	9.99507	4.97204e-08
Arhgap30	-0.732728	8.5641	8.14604e-14
Ibtk	-0.732435	10.4271	4.28791e-08
Atp5a1	-0.731626	10.1022	4.77022e-07
C430004E15Rik	-0.731622	10.003	2.746e-08
Vegfb	-0.73145	11.3342	1.10131e-08
6330403E01Rik	-0.730812	9.76272	3.01602e-09
BC038156	-0.730093	9.50772	2.17124e-11
Gcnt2	-0.729841	9.78253	4.01814e-14
C330036H15Rik	-0.729796	8.58269	7.17982e-10
Ddit4	-0.729738	11.737	1.58107e-06
Idh2	-0.729148	9.75197	6.9546e-07
AI663987	-0.728821	10.5317	3.57754e-08
Stard5	-0.728392	9.07135	1.07398e-08
Vegfa	-0.72763	8.83872	6.94919e-14
2310007G05Rik	-0.727596	10.1515	8.82493e-10
Rnf134	-0.72652	11.5355	3.32467e-09
9830139D05Rik	-0.726234	9.36918	1.47446e-10
Hars2	-0.725539	9.62067	1.36767e-05
G3bp	-0.725452	12.5558	5.4148e-11
Lrrc5	-0.72537	11.7388	3.02588e-07
Notch4	-0.724357	8.7539	5.80543e-10
Fh1	-0.72416	11.0317	0.000441329
1110001J03Rik	-0.723723	11.1342	6.52225e-09
Isy1	-0.722499	11.7044	3.55453e-12
Elavl2	-0.721764	9.92363	2.39198e-06
Wdr31	-0.721405	8.96586	2.41824e-09
D10Ertd214e	-0.720866	9.36564	4.08038e-05
Rragb	-0.720635	10.1662	5.38601e-10
Ppap2b	-0.720596	9.42912	1.86297e-08
Mrps9	-0.719656	11.1186	0.00194478
2310008H04Rik	-0.719166	9.89183	1.07292e-10
Ppm1k	-0.718884	8.85695	4.32259e-12
Mmp11	-0.718646	9.20617	1.17357e-08
AI467606	-0.717658	9.01348	3.21243e-10
Gys3	-0.716598	8.84595	8.11225e-08
Rnu3ip2	-0.716533	10.6109	7.21042e-11
2610319H10Rik	-0.714992	9.7653	1.83328e-07
Btg1	-0.714981	10.5361	1.13144e-06
Pold1	-0.714603	11.9275	2.27839e-09
1810037J08Rik	-0.714422	11.5562	3.46839e-08
Smpdl3b	-0.713018	11.127	2.3849e-07
Gfod1	-0.712829	8.67861	9.65977e-07
Gga2	-0.712272	11.8727	2.02032e-11
LOC235857	-0.712179	10.2896	1.31168e-07
4933424A10Rik	-0.711942	8.54827	7.42262e-08
Mapt	-0.711202	8.74125	0.000183876
Smc1l2	-0.710594	8.70134	7.18168e-06
LOC229599	-0.709624	8.83593	9.50376e-12
1810008A14Rik	-0.709436	9.45062	0.00366272
Aqp3	-0.709385	8.81437	1.31636e-07
D430028G21Rik	-0.708754	9.08526	2.19041e-08
Dnajc15	-0.707257	11.5235	4.67777e-08
Ptch1	-0.707055	8.75923	3.06046e-14
C330018L13Rik	-0.706656	9.7854	5.80194e-12
Pace4	-0.706578	9.76296	3.36714e-08
Cdk5rap3	-0.706549	12.5648	8.29073e-06
A830055I09Rik	-0.706352	9.76502	5.01214e-06
Plekhk1	-0.70616	8.99621	3.25634e-15
Fah	-0.706091	10.2136	0.00058093
1700013L23Rik	-0.705691	8.89116	1.20633e-09
2810441K11Rik	-0.705292	9.5649	7.1661e-07
Nspc1	-0.704952	10.6587	1.45095e-07
Pdxp	-0.703874	9.98577	5.02434e-10
Map2k3	-0.7038	11.4738	1.3008e-10
BC024814	-0.702741	9.13368	1.33239e-09
2410022L05Rik	-0.701416	10.4152	2.17779e-09
2410006H16Rik	-0.700671	10.791	0.00147565
Fkbp11	-0.700351	11.281	1.44677e-09
Vwf	-0.699585	8.49445	0.000128662
Zfp95	-0.699324	10.3341	4.35119e-07
Card4	-0.697691	9.88805	0.000979695
Sfrs14	-0.696859	10.2911	1.93564e-09
5830476B15Rik	-0.696434	8.85792	6.13042e-12
Rbpms2	-0.694587	12.0877	1.57006e-08
Sin3a	-0.69397	11.2148	1.58883e-10
Slc39a4	-0.693294	9.63697	2.41264e-06
E430027N06Rik	-0.693065	11.3168	2.67671e-12
5830411K18Rik	-0.692663	10.0708	5.5608e-11
Psip1	-0.692475	11.6147	1.36033e-10
Mrpl2	-0.692163	11.6255	4.46463e-09
2900019M05Rik	-0.691364	8.76064	1.60737e-12
Foxn4	-0.68963	8.34638	1.95851e-08
S100a1	-0.688934	8.72756	8.23674e-05
Ift172	-0.688642	9.54284	3.47708e-11
BC028528	-0.688112	8.53352	1.57624e-10
Fcgrt	-0.687277	8.69638	1.7783e-13
Cdca3	-0.687173	11.7596	3.8542e-10
Actr3b	-0.683319	8.82442	3.55428e-09
2210013O21Rik	-0.683256	11.3265	7.99821e-07
4930432K21Rik	-0.68308	9.20039	0.000133988
Spink3	-0.682851	8.6183	3.74446e-11
LOC634428	-0.682669	8.54013	2.12056e-07
Frrs1	-0.681996	10.2825	3.74446e-11
Gdf1	-0.681542	9.70564	4.04301e-05
2010004M13Rik	-0.680978	8.89165	7.02714e-09
2610036D13Rik	-0.680362	10.0363	2.3255e-08
9130210N20Rik	-0.680227	9.94036	0.0081191
Tle6	-0.680143	9.66981	1.63341e-06
Taf5l	-0.679025	9.75008	8.99791e-09
Ppp1r1a	-0.677314	10.5148	0.000356483
Slc31a1	-0.676584	10.2072	1.84684e-10
Tnip1	-0.676384	9.07336	9.52707e-14
Adipor2	-0.676303	11.4437	4.91721e-05
Mcm6	-0.675758	11.6822	0.00619343
1700012G19Rik	-0.675564	13.2648	6.55123e-11
2210409E12Rik	-0.675451	10.3407	0.00332106
Cbr1	-0.673296	9.4195	7.59076e-10
Mrps5	-0.673283	10.2425	1.51544e-12
EG433923	-0.673167	12.6092	5.35012e-10
Arp3b	-0.67271	8.76214	9.07673e-11
Pgbpll	-0.672025	9.81224	1.86972e-10
Sall1	-0.67183	9.01485	3.44604e-09
Abtb1	-0.671665	9.54468	1.69005e-08
Ppif	-0.67156	12.521	1.30039e-07
A630086H07Rik	-0.670049	9.58439	2.86634e-09
Lig1	-0.669251	10.2269	3.54377e-12
Urod	-0.668556	12.4721	3.1873e-11
Lcmt1	-0.667328	10.7322	4.58174e-14
Dpm3	-0.666879	10.5288	1.62205e-07
BC060631	-0.666822	10.5191	1.97356e-13
2410017P07Rik	-0.665927	9.84374	1.68892e-08
5730419I09Rik	-0.664623	9.34045	1.16447e-08
Cdyl2	-0.661948	9.24812	5.80445e-11
Eed	-0.660587	9.8868	1.51418e-07
Triml1	-0.65918	10.0693	3.43412e-08
Dazap1	-0.659114	11.2646	6.94322e-10
LOC386529	-0.659111	8.49272	3.04594e-10
Bat8	-0.658912	10.0044	1.54291e-08
Gart	-0.658848	12.4395	2.40774e-08
Idh3g	-0.658671	12.4795	1.62041e-09
Adam19	-0.658023	9.72308	6.70406e-08
Hadh2	-0.65778	10.7856	1.79791e-08
9930032E18Rik	-0.657407	9.2115	3.47708e-11
Zfp292	-0.65711	9.89229	9.86731e-11
scl0001487.1_50	-0.656579	10.7869	8.42405e-10
D930048N14Rik	-0.65632	9.26097	1.32832e-10
X83328	-0.656216	10.2902	2.42258e-08
3110053G12Rik	-0.656173	9.12633	2.46689e-10
Snta1	-0.655659	9.07099	7.78764e-14
D4Wsu114e	-0.654474	9.81621	1.59006e-12
Ankmy2	-0.654175	10.3558	5.99282e-08
E130307M08Rik	-0.653505	10.5482	4.24654e-06
scl0002975.1_346	-0.652833	9.47023	3.20747e-08
2700097O09Rik	-0.651892	11.6479	1.97172e-10
C330006A16Rik	-0.651651	9.89377	5.20065e-09
Ilf3	-0.650939	10.8236	8.18692e-11
Gls2	-0.65091	9.81855	7.80942e-05
Fbxo27	-0.650487	9.27873	0.000143198
Polr2e	-0.650246	11.26	5.76327e-09
A530026H04Rik	-0.650122	9.20087	6.16046e-12
Ipmk	-0.650012	9.78152	7.19431e-08
Ldb1	-0.649488	12.7612	3.22262e-11
5430440L12Rik	-0.649325	9.41746	4.93428e-13
Brp17	-0.649052	8.70505	3.86665e-09
Lancl1	-0.648713	9.53523	0.000135504
D15Ertd405e	-0.648701	9.57129	1.52724e-10
LOC228715	-0.648625	9.88512	4.70518e-08
Myo5c	-0.647735	8.59558	5.45215e-05
Zfp96	-0.64755	10.4796	3.60084e-09
Rpain	-0.647111	10.1311	3.40387e-10
Ruvbl1	-0.646672	11.837	1.1279e-11
Dbf4	-0.646426	12.0634	2.65227e-07
Pias3	-0.645942	9.08187	1.81135e-11
Aurkb	-0.645136	10.7135	1.08625e-10
scl0002449.1_77	-0.644872	10.8721	9.3101e-10
Ddx11	-0.643237	10.6136	1.41036e-10
H1fx	-0.643016	9.2803	1.17235e-06
Nfil3	-0.642916	9.43448	3.39167e-11
Th1l	-0.642856	10.2994	2.27323e-10
Igsf3	-0.642332	10.1186	1.49093e-09
Uchl3	-0.641565	10.0673	6.56338e-11
Ephx2	-0.64137	9.17244	3.59771e-08
Mrps31	-0.64121	11.3606	6.46515e-09
Bckdha	-0.640149	10.2345	4.92459e-09
Nars	-0.639685	11.6962	1.21609e-07
Suv420h2	-0.6395	10.8672	1.99455e-11
Evc2	-0.638884	9.00666	1.11642e-07
Sars	-0.638881	10.7449	2.1133e-07
1110025F24Rik	-0.638751	10.5116	2.18783e-08
Pex11b	-0.638545	10.5071	1.19821e-12
3110002L15Rik	-0.638362	9.57963	5.80606e-12
Mcm10	-0.638118	11.9653	1.83514e-11
Fars2	-0.637927	10.8061	8.70755e-10
Rad9b	-0.637845	9.48371	1.96786e-06
Odz4	-0.636744	8.99731	1.05303e-06
Thtpa	-0.635102	9.40775	1.56928e-11
Itpka	-0.635004	8.69951	1.19159e-05
scl0004176.1_1597	-0.634474	9.7347	8.24558e-13
Mapk1ip1	-0.634179	9.69074	8.74021e-11
Ccnt2	-0.633138	9.6142	0.000463886
LOC215415	-0.632226	8.45585	1.06484e-06
Tfb1m	-0.631174	9.13206	8.75847e-12
Dcps	-0.630254	10.5914	2.92494e-10
Csad	-0.630119	8.72902	5.01578e-07
Gloxd1	-0.630104	8.65487	7.77309e-11
Mrpl24	-0.62756	11.2298	3.06636e-08
2010204K13Rik	-0.627067	9.10074	6.18513e-11
Mif4gd	-0.624336	10.1138	2.8269e-13
2810002N01Rik	-0.623463	10.2405	1.44031e-06
Gtpbp6	-0.623163	9.5046	4.78215e-08
Nfatc2ip	-0.623054	9.14765	1.6432e-08
LOC237877	-0.622523	10.1424	5.76794e-09
C130091E20	-0.622216	8.51932	6.31858e-05
LOC226486	-0.621764	9.26271	3.48855e-10
G630064H08Rik	-0.62142	8.68307	7.88704e-08
2510027N19Rik	-0.620964	11.7179	1.70729e-08
Dtymk	-0.62075	12.0194	0.00308225
Dync2li1	-0.62006	9.34629	8.70241e-13
H2afz	-0.619817	13.1142	4.1766e-09
A730023M06Rik	-0.619295	8.83782	1.31189e-09
18S_rRNA_X00686_849	-0.619251	11.9894	0.00277267
Deadc1	-0.619051	11.1404	9.30012e-10
2610301N02Rik	-0.619046	9.10132	2.39558e-07
Cenpp	-0.61903	9.99897	8.73618e-13
Ccnd3	-0.618702	11.0482	1.15022e-06
LOC380718	-0.617564	8.8644	1.0645e-09
Chek2	-0.617508	9.0587	2.56292e-11
6430628O11Rik	-0.617381	9.04648	3.26167e-05
C330023M02Rik	-0.617158	10.5942	2.73312e-11
Sod1	-0.617039	12.7073	2.23576e-10
Kif22	-0.617008	12.0542	3.12473e-08
1810008K03Rik	-0.615653	11.6131	0.00678993
Pak4	-0.615604	10.7152	4.22184e-10
Rpl22	-0.61541	12.1771	0.00312759
Cryz	-0.613593	8.73721	5.18566e-13
Hspb6	-0.612933	9.29045	4.41146e-09
Ddx6	-0.612716	10.057	1.10549e-07
Coasy	-0.612198	10.1539	2.21139e-09
Blvrb	-0.609796	10.7889	6.13009e-05
Fez1	-0.609163	9.17454	0.00135708
C530028I08Rik	-0.607859	8.9355	3.51175e-10
Cdo1	-0.607774	8.95851	1.02834e-07
Cwf19l2	-0.607371	10.2632	7.22231e-09
Uhrf1	-0.606807	12.0062	1.0019e-11
Atp5c1	-0.605814	14.2224	1.3588e-09
Chi3l1	-0.605236	8.30326	0.00774204
Usp37	-0.603838	9.88819	0.00246308
Uqcrc1	-0.603744	12.2257	2.13582e-09
Hax1	-0.603645	11.6353	1.0794e-09
Mical3	-0.602544	8.68566	1.02396e-09
Dedd2	-0.602138	9.48964	6.25342e-09
Ssx2ip	-0.601676	9.85127	1.08859e-06
Pdk3	-0.60147	9.87733	2.11786e-07
B930041F14Rik	-0.601426	10.3473	0.000258716
5430416N02Rik	-0.601342	10.4715	3.04473e-09
Camk2n1	-0.601129	9.14187	2.52039e-07
Snrpa1	-0.600949	11.184	2.86935e-07
6330406L22Rik	-0.600586	8.73962	0.000936034
Tkt	-0.600036	10.3147	2.32675e-05
1700030K09Rik	-0.599645	9.09259	1.41613e-11
Mkrn1	-0.599363	9.75359	3.64274e-07
scl0003448.1_536	-0.598957	9.85934	9.84388e-09
Hus1	-0.598386	11.0817	2.27906e-07
Bcas3	-0.59777	10.5992	2.0397e-08
Gmcl1	-0.597658	9.755	5.48435e-14
Ccdc111	-0.597499	9.17557	3.85879e-09
AY078069	-0.596045	9.27685	3.7757e-05
Cnot10	-0.595247	10.3501	4.00184e-10
2010110M21Rik	-0.594986	13.3845	3.15388e-05
0710007G10Rik	-0.59498	8.87445	0.000239315
scl0002507.1_236	-0.594507	9.60829	9.98728e-08
A430005L14Rik	-0.594411	10.131	2.80153e-09
LOC381411	-0.594112	8.22316	0.0103062
Sirt1	-0.593746	11.1089	2.84093e-09
Thop1	-0.592853	10.7055	1.72844e-09
Rage	-0.592789	8.6747	6.98653e-14
Tubg1	-0.592613	9.80794	3.19206e-09
1110001K21Rik	-0.592382	11.0109	7.36706e-12
0610012G03Rik	-0.592112	10.8148	1.76554e-09
Amhr2	-0.591646	8.5703	2.4631e-13
2810418N01Rik	-0.59152	10.4515	4.01969e-08
D630016K15Rik	-0.591331	8.69428	1.59469e-09
Tgif	-0.590769	10.0115	2.68938e-10
Mrpl14	-0.590347	11.3114	9.4307e-10
Cln5	-0.589909	11.1716	4.99936e-05
2310022A10Rik	-0.589817	10.1888	5.17947e-12
E130012A19Rik	-0.589591	12.0564	7.40473e-08
Trps1	-0.589413	8.72326	1.75281e-12
2610019I03Rik	-0.589153	9.79929	1.2487e-06
Rybp	-0.588595	11.1597	1.06762e-08
Top2a	-0.588533	11.0375	4.09118e-10
Gm128	-0.588351	8.58619	1.45456e-08
Creld1	-0.587892	9.44373	2.90298e-05
D0HXS9928E	-0.587805	9.94834	6.39154e-11
Fbxo42	-0.587709	9.12427	2.23269e-12
6330403M23Rik	-0.587687	9.05727	4.5e-06
Tnk2	-0.587168	8.76894	7.2189e-10
1810033A06Rik	-0.586725	9.35433	4.8238e-08
Echs1	-0.586195	10.3996	7.84831e-08
Morc3	-0.585274	11.3845	8.44836e-09
Hist1h3a	-0.584994	10.5778	0.00189863
Snrpd2	-0.584952	14.0547	1.27811e-09
Cox18	-0.584798	11.5216	2.94154e-10
AV312086	-0.584691	10.7531	1.7707e-08
Rrm2	-0.584473	9.93348	1.87731e-09
Kcnu1	-0.584288	8.53902	5.47406e-09
Ak2	-0.584181	10.9227	2.53473e-08
G22p1	-0.584093	11.4387	2.76618e-07
C80913	-0.583791	10.9476	1.59017e-06
Calml4	-0.583541	8.43293	1.19964e-07
LOC229810	-0.583448	10.7002	3.10072e-07
Piga	-0.582945	9.43946	4.26762e-10
Fxyd6	-0.582477	11.2689	2.91928e-06
Esco2	-0.582312	11.5638	1.81667e-06
1110029I05Rik	-0.582118	9.84048	1.6051e-08
2610014F08Rik	-0.581792	8.96196	1.74067e-09
Sox16	-0.581381	8.69911	1.42151e-09
9630025B04Rik	-0.581103	9.88338	2.0889e-06
9330107J05Rik	-0.578318	10.3309	0.0013241
Tera-pending	-0.578266	12.1867	7.49621e-05
AW060207	-0.578156	9.56326	3.59044e-14
AW549877	-0.577887	12.0994	1.67673e-05
Lmnb2	-0.576853	10.1676	4.99847e-10
B930014J03Rik	-0.575752	8.77095	5.9797e-08
2610510L01Rik	-0.575278	9.62427	7.65784e-11
4833425P12Rik	-0.574761	9.31557	1.84934e-08
C730029F17Rik	-0.57413	10.1329	2.56474e-08
Mbd4	-0.572486	9.22475	2.72097e-10
Galnt11	-0.572405	9.43449	3.61246e-11
LOC654426	-0.572231	12.27	3.00315e-09
5730409G15Rik	-0.57202	8.97176	2.74461e-09
Atp5g1	-0.571729	12.9956	3.93401e-06
Wdr51b	-0.571591	10.2834	4.23778e-08
1700023O11Rik	-0.571157	10.088	1.0408e-12
D4Ertd432e	-0.571053	8.80926	1.15327e-08
LOC381691	-0.571033	9.14402	5.5061e-09
D10Jhu81e	-0.570946	10.0896	2.47899e-05
LOC238943	-0.570396	11.2884	6.40773e-08
Zfp41	-0.570175	10.0348	2.71913e-06
Gngt2	-0.568931	8.43105	3.03774e-12
Mrpl28	-0.568716	12.5875	1.89491e-08
Pbk	-0.568566	11.2767	2.67018e-05
2010007H12Rik	-0.568101	10.396	3.44604e-09
Ris2	-0.567916	11.9957	6.21384e-08
Enpp4	-0.567812	8.62785	3.3805e-09
Mkrn2	-0.567537	10.0148	4.85702e-09
Sall4	-0.567528	12.3673	4.6989e-10
2610511O17Rik	-0.567435	10.7289	8.82776e-07
Itpr3	-0.567424	8.92739	8.57585e-12
Xpot	-0.567068	10.9858	9.77774e-10
Taldo1	-0.567056	12.9672	9.38777e-10
AA517739	-0.566878	8.58099	1.37994e-08
Eif2b3	-0.566699	11.3412	8.18408e-09
2310045K21Rik	-0.564851	10.3829	4.00184e-10
Msrb2	-0.564806	8.94567	2.57836e-05
Hspbap1	-0.564574	11.0299	1.05962e-09
Cyp2s1	-0.564392	8.90156	9.39021e-09
B130055D15Rik	-0.563565	11.2171	2.77646e-10
2810026P18Rik	-0.56351	11.3824	4.69336e-10
Banf1	-0.563258	12.2681	5.02289e-11
Adprh	-0.562533	12.0312	1.30945e-07
Stac2	-0.562077	8.67468	9.17711e-09
Ncapd2	-0.561827	10.2201	1.33602e-10
D630036F01Rik	-0.561258	8.68342	2.59602e-08
Rap1gds1	-0.560716	10.9288	5.6114e-07
Insm1	-0.560517	8.71667	0.000114053
Cd9	-0.560509	11.8244	2.58714e-07
B4galnt4	-0.560434	8.50889	3.20207e-09
Trap1	-0.559899	11.4441	2.36066e-10
Rims3	-0.559702	9.55018	3.09482e-06
3110082I17Rik	-0.559684	9.69296	9.44017e-07
1110014J17Rik	-0.558659	12.1196	4.96446e-08
0610007N19Rik	-0.558608	8.74284	9.15073e-10
Zfp296	-0.558515	10.0039	7.98775e-09
Plcb3	-0.558419	9.06513	9.50376e-12
LOC268569	-0.558364	14.4519	5.4445e-09
Nudc-ps1	-0.558361	9.71013	6.27595e-05
Atxn7l2	-0.557685	8.97769	6.73149e-09
Cdc42ep3	-0.557518	8.94611	2.5837e-08
Gm50	-0.556903	8.89657	1.4945e-10
Ndufa7	-0.556625	13.5468	2.41679e-11
Alg6	-0.556532	9.80566	1.70729e-08
Usp48	-0.556395	9.94996	3.34139e-12
Orc5l	-0.556311	11.4829	2.35824e-08
Hexb	-0.55606	9.10479	4.20805e-08
LOC232887	-0.556045	10.0763	0.00254353
Tpi1	-0.556037	13.1374	4.2581e-08
5730509K17Rik	-0.555546	8.94671	0.000244979
A630046C11Rik	-0.555227	11.3495	1.72043e-09
Eif2b4	-0.555119	11.3021	2.22775e-10
Nudt2	-0.553964	9.27357	6.83454e-09
Sephs2	-0.553707	10.0678	1.69996e-08
Ppid	-0.55357	13.7189	3.05065e-08
1110046J11Rik	-0.553294	10.4837	2.74918e-06
Trim28	-0.552439	14.1654	2.32737e-08
Nav1	-0.551558	9.80251	0.0094075
Sdfr2	-0.551459	9.81007	2.19245e-06
D430022H17Rik	-0.551396	9.08338	5.58647e-07
1110068E08Rik	-0.549835	10.349	7.38155e-10
Wdr34	-0.549571	10.1739	8.22706e-05
Dcamkl2	-0.549004	10.0337	0.00021724
Sirt5	-0.548958	8.80882	4.10028e-11
Atp5j	-0.548371	12.435	3.37253e-07
4932441K18Rik	-0.548208	10.2197	1.658e-08
As3mt	-0.548182	8.43684	4.60337e-10
Nol5a	-0.548011	12.0886	1.84197e-07
2410006F12Rik	-0.547794	10.0691	1.62041e-09
Whdc1	-0.547782	9.01051	1.89373e-10
Pik4ca	-0.547154	10.9501	0.00012157
Mcm7	-0.547148	11.1066	7.88308e-08
BC017133	-0.547129	10.405	1.98924e-07
Pitrm1	-0.546782	11.7255	1.8485e-06
Jmjd2c	-0.546741	9.2307	1.74924e-06
AI256711	-0.546365	8.82075	3.75936e-06
Gm1967	-0.545393	8.20379	0.00643967
Arid5b	-0.545144	9.56282	1.23396e-11
Vps28	-0.544664	13.1877	2.82078e-07
LOC226135	-0.544343	9.26354	5.85159e-10
Tmem143	-0.544297	8.67966	1.27628e-12
Slc25a15	-0.544187	9.42491	5.43828e-08
9530018I07Rik	-0.542681	9.25464	2.6233e-07
Tdgf1	-0.542521	8.52111	2.71271e-10
Mrpl23	-0.541916	12.6139	5.03242e-05
Hprt	-0.541909	12.1756	6.1557e-07
Ampd1	-0.541685	8.36159	2.08834e-10
Lypla3	-0.540225	10.2276	5.86746e-08
Wdr5	-0.540081	10.5202	1.89902e-05
BC024659	-0.540025	8.74197	6.81059e-13
Syncrip	-0.539455	10.1076	4.15444e-14
Osr1	-0.5393	11.1111	8.2857e-06
Kif11	-0.539214	10.4872	3.45337e-08
4932408F19Rik	-0.539157	9.02917	1.35618e-05
Dtx1	-0.538799	8.92044	2.13921e-07
Bcat1	-0.538786	10.637	6.82742e-09
Gcat	-0.538696	9.63972	4.91281e-08
Aco2	-0.537987	11.2895	2.23227e-11
5830482G23Rik	-0.537635	9.66929	3.27013e-07
Farsb	-0.536907	13.4608	0.00179758
1700012H17Rik	-0.536751	9.89803	1.15765e-10
4432409B16	-0.536731	10.8498	7.41429e-11
Oxct	-0.536155	11.2157	2.21418e-05
LOC385086	-0.535934	11.0241	0.045782
Sorl1	-0.535755	8.58607	9.77643e-12
LOC277856	-0.535475	12.2176	1.14944e-06
Mtch2	-0.535074	11.0351	4.16276e-10
Lin54	-0.53503	11.0672	1.11887e-06
4933439J20Rik	-0.533977	8.81504	3.49495e-09
BC051227	-0.53333	9.63158	1.97181e-07
Dguok	-0.53331	9.84271	1.24234e-09
Tek	-0.533206	8.46686	5.87452e-10
2600005C20Rik	-0.533056	12.13	4.4805e-11
9430008C03Rik	-0.532913	11.5058	4.46713e-08
Btbd2	-0.532763	8.90032	6.67726e-10
Tpmt	-0.532636	8.68435	2.26653e-14
LOC277860	-0.532528	9.25333	9.47782e-08
Pafah1b3	-0.531655	10.5621	7.73012e-11
C77032	-0.531149	13.565	1.48514e-09
Fcho1	-0.530852	9.32461	6.62671e-10
LOC268673	-0.530719	8.97293	2.83326e-08
Amid	-0.530628	8.55949	4.79813e-13
Nasp	-0.530598	12.4564	8.71783e-09
Tuba4	-0.530178	8.63372	1.4276e-07
Ech1	-0.530019	11.3335	9.00245e-06
BC055324	-0.529641	9.41151	0.00499327
Pipox	-0.529593	8.64337	1.22752e-09
Mutyh	-0.529547	9.03331	4.89672e-12
4930455F23Rik	-0.529372	9.44143	4.44853e-05
Arc	-0.52915	8.51962	3.86922e-09
Tmem2	-0.52905	10.253	2.1133e-07
2310005O14Rik	-0.528839	9.90452	1.73964e-08
Ndufs6	-0.528475	14.2893	3.71867e-10
Tada2l	-0.528317	9.20514	7.65784e-11
Mrpl4	-0.528079	10.3565	6.33217e-08
1810015A11Rik	-0.527466	9.601	2.76785e-05
Vdac1	-0.527199	13.5147	7.37675e-08
1190007I07Rik	-0.527076	9.06731	3.46117e-07
Casp2	-0.527041	9.96447	6.27274e-09
1110059F07Rik	-0.526944	9.53563	6.88388e-05
Ncaph	-0.526575	11.2951	5.80058e-09
Slc2a1	-0.526479	13.8631	2.00307e-05
BC085271	-0.525871	12.4475	3.23575e-08
AU040950	-0.525635	8.72175	3.31675e-07
Cbln1	-0.525289	8.32299	0.000110784
Sdhb	-0.525049	9.96301	6.8797e-11
1110003P22Rik	-0.524687	10.022	2.31458e-07
Ipo9	-0.524272	10.8914	0.00373523
Hcph	-0.523906	9.19976	5.7697e-11
Actn3	-0.523588	8.7505	3.75846e-12
Snx10	-0.523135	10.8878	5.64933e-05
Dgcr6	-0.52309	9.27185	5.02232e-08
Elovl6	-0.522988	11.6576	1.65753e-05
Sesn1	-0.522988	9.1596	1.51451e-07
Zcchc8	-0.522867	10.3437	7.79238e-12
LOC381132	-0.52275	8.28039	1.26584e-09
Mef2b	-0.522633	8.98461	4.45704e-08
Acacb	-0.522392	8.64199	1.77293e-11
Supt3h	-0.521796	10.8484	1.57682e-08
BC025462	-0.520996	9.09417	9.79168e-11
Acp1	-0.520903	9.50464	2.13923e-08
Nrm	-0.520235	11.7981	0.00101603
Apobec1	-0.520186	9.01607	3.46117e-07
LOC227384	-0.520029	10.5176	6.54165e-07
D5Bwg0834e	-0.519833	10.1507	1.47622e-09
B230113M03Rik	-0.519706	12.6542	1.92441e-07
Trim27	-0.519281	10.5156	4.74123e-05
18S_rRNA_X00686_301	-0.518623	13.1363	0.0140293
Lars	-0.518517	12.6617	2.26361e-08
Akr7a5	-0.518511	10.6572	3.02707e-10
Grit	-0.518331	9.77618	3.97642e-06
Siat7c	-0.518219	8.64681	4.16381e-10
Lrrc15	-0.517989	8.48727	2.85875e-07
Tbc1d15	-0.517856	11.2493	9.29463e-07
Nthl1	-0.517707	9.54148	5.31864e-06
Mrpl36	-0.517568	12.0461	2.62531e-07
LOC207939	-0.517431	8.44927	5.36782e-10
6330580J24Rik	-0.517354	9.27402	2.14921e-08
Hmgcl	-0.517225	10.0491	5.64502e-07
S100a13	-0.516857	8.88962	6.90815e-05
2610318N02Rik	-0.516354	9.08056	3.63891e-06
Mbldc1	-0.516068	8.74092	4.22474e-10
Apoe	-0.515367	11.8957	0.00104
Nvl	-0.514576	9.87747	0.000757795
Padi6	-0.514556	8.31021	2.66163e-08
LOC244421	-0.514422	8.62952	3.34106e-07
Nt5c3	-0.514096	9.65008	2.6981e-05
Atic	-0.514066	9.92262	0.00276964
D10Ertd322e	-0.513961	12.2984	2.09116e-09
C330029B10Rik	-0.513957	8.8646	2.91769e-11
Mknk1	-0.513733	8.87992	2.33642e-10
Slc25a28	-0.51366	11.066	2.66488e-07
Zbtb7	-0.513165	9.32834	3.56827e-08
Aip	-0.513078	11.4264	1.21776e-06
Rmnd5b	-0.512975	8.76145	2.95564e-08
Hist1h3i	-0.512228	9.89879	0.0032321
Ndufv2	-0.511505	13.2343	4.31761e-07
1810049H13Rik	-0.51119	9.04116	4.59186e-05
B230205C01Rik	-0.511151	8.7914	2.20437e-11
Enpp5	-0.511079	8.79127	2.26615e-07
A630034E16Rik	-0.511022	9.46314	1.6564e-09
Zfhx2	-0.510971	9.9531	0.00690344
5033421J10Rik	-0.51092	8.95529	8.92744e-10
Pgam1	-0.510265	10.3817	3.62736e-06
Dscr2	-0.509913	11.1235	2.06894e-07
P4ha1	-0.509866	8.58917	2.02049e-11
Cdc37l1	-0.509736	9.32921	4.10361e-12
Tnk1	-0.509671	9.34712	0.00118462
BC038311	-0.509501	10.3307	1.89452e-10
sty	-0.50931	10.8513	0.00989411
AI115600	-0.509146	9.12369	2.29322e-06
Jam2	-0.509098	8.36493	1.99752e-13
2410015B03Rik	-0.508995	9.03923	2.69276e-08
Bola3	-0.50894	10.6623	5.2759e-06
Mt2	-0.508732	9.30373	0.00145983
Mapbpip	-0.508507	9.41628	3.65272e-07
A930026I22Rik	-0.50844	9.27545	2.56151e-07
Mcm4	-0.508434	12.3815	2.66276e-08
2610007K22Rik	-0.508184	11.7996	1.21471e-07
Osbpl2	-0.507153	9.3446	2.27791e-08
E030026I10Rik	-0.507069	8.57205	3.28325e-09
Fbxo31	-0.506889	9.34684	8.87158e-09
Hnrph3	-0.506885	9.11294	2.83441e-08
Rbbp5	-0.506875	8.96941	0.00195102
AK122209	-0.506511	9.86655	2.35958e-05
Plrg1	-0.505535	13.2485	2.96697e-08
Skp2	-0.505529	9.73788	1.01845e-11
Uxt	-0.505461	11.2099	5.52833e-07
LOC223797	-0.504463	13.7917	0.000603949
Rhebl1	-0.503765	9.92237	1.70729e-08
Pcyt2	-0.503081	9.10359	8.26789e-11
2210408F11Rik	-0.502973	9.94005	4.04529e-05
Tmem81	-0.502849	8.55925	3.62803e-06
1810006K23Rik	-0.502455	8.88058	5.82819e-10
Flot1	-0.502168	10.1558	4.12103e-09
Hmbs	-0.502081	10.0944	1.11478e-07
2410018M08Rik	-0.502009	9.01012	1.879e-06
D130071O13Rik	-0.501802	9.30575	8.20358e-09
Lrrc2	-0.50175	8.49345	7.88308e-08
Nr1i3	-0.501495	9.06416	1.61506e-05
Rnf34	-0.5013	10.4012	3.58817e-09
Copz2	-0.500964	8.79421	0.0071665
LOC654467	-0.500731	12.142	1.72808e-06
B020018G12Rik	-0.500556	12.8148	1.14603e-05
Lgals9	-0.500434	8.47163	0.00424548
1700014P03Rik	-0.50011	8.40248	4.42127e-07
LOC384206	-0.500099	14.7647	1.03172e-07
5830467J12Rik	-0.49987	8.52076	2.97487e-07
Gtpbp1	-0.499774	9.42291	2.26995e-09
Plekhf1	-0.499218	8.68697	1.57624e-10
Hist1h4k	-0.498837	9.10535	0.000873979
Trib3	-0.49813	9.91059	2.23677e-05
C330042K07Rik	-0.498093	8.8684	2.26995e-09
Sh3tc1	-0.497607	8.50875	6.9416e-10
Gtrgeo22	-0.497	9.28976	1.37519e-08
Abhd8	-0.496877	8.70238	2.5219e-06
Cbfa2t2h	-0.496744	8.40306	6.95583e-13
Cox15	-0.496097	10.3798	5.2206e-10
LOC232879	-0.495066	10.109	1.0635e-07
Exosc7	-0.495029	13.3546	5.08645e-08
Acat2	-0.494662	10.3055	3.40376e-06
Dip3b	-0.49454	9.44541	2.89434e-06
Mrpl34	-0.494322	10.9486	2.21139e-09
B230373P09Rik	-0.493706	8.55605	1.20872e-08
2410075B13Rik	-0.493242	8.84086	7.09413e-11
Ier3	-0.493068	10.7182	0.0057155
L1td1	-0.492148	12.4278	0.000113812
Ppm1m	-0.492104	9.38467	2.80698e-05
Pycrl	-0.492064	9.74861	5.26655e-06
Fibp	-0.491936	10.4894	4.69097e-05
Cd97	-0.491373	8.81585	5.40516e-11
Ddb2	-0.49107	8.95408	2.99073e-07
Chc1	-0.490637	9.85409	8.86233e-06
2610009I02Rik	-0.490304	9.61417	3.73646e-10
Glb1	-0.490179	9.15201	4.351e-07
Pank2	-0.489941	10.738	1.41857e-07
C1qbp	-0.489639	12.5271	1.25906e-06
Phf10	-0.489522	11.0563	0.000257467
1700013A01Rik	-0.489473	9.5833	5.58889e-11
2610018O07Rik	-0.489062	8.69441	1.0593e-10
Nsbp1	-0.488323	10.4535	0.000416969
Hist2h2ab	-0.48796	9.4427	2.42622e-10
Elovl5	-0.487804	12.4252	0.00023933
Clra	-0.487741	8.52799	5.27e-09
5730410I19Rik	-0.487464	11.5885	1.65713e-08
Arl4	-0.487281	8.5907	2.968e-10
Fignl1	-0.487177	11.6089	4.40443e-07
Nfyb	-0.487135	11.8901	6.14155e-06
Kctd2	-0.486802	10.0941	7.70852e-05
1300018L09Rik	-0.486546	8.67849	3.06796e-06
2700038I16Rik	-0.486535	9.84792	4.16351e-06
Plekhg5	-0.485927	9.00736	6.27705e-05
Ak7	-0.485688	8.37109	0.000129689
Ifi30	-0.485603	9.86394	0.000721314
Apoc1	-0.484589	11.1151	0.0217858
Aplp2	-0.484214	12.4831	1.82626e-05
Tagap	-0.484089	9.16512	1.06479e-12
Cuedc2	-0.484085	10.4029	4.1401e-06
Ptprk	-0.483953	9.39024	2.22388e-05
Ascc1	-0.483008	10.3074	1.90765e-07
Timeless	-0.482923	9.44344	3.49495e-09
Ogt	-0.482743	9.82011	4.41146e-09
LOC210582	-0.482494	8.72494	1.01623e-06
Htra1	-0.481536	8.87529	7.31746e-05
Ttc5	-0.481112	9.4507	6.39298e-07
Fabp3	-0.481039	13.1371	4.74954e-05
Foxred1	-0.481013	9.2655	1.08165e-11
Keo4	-0.48095	9.07276	7.87234e-10
Apg10l	-0.48076	8.95228	3.67906e-05
BC013491	-0.480684	8.6249	0.000206955
Fxr2h	-0.480564	9.50851	2.36066e-10
Gnptab	-0.480479	8.71552	6.46644e-09
Mtrf1	-0.480198	8.81883	3.72735e-11
Cchcr1	-0.480013	9.03069	5.04599e-08
Zap70	-0.479788	8.3022	0.00034074
BC048355	-0.479664	9.50686	1.0426e-05
Pla2g12a	-0.479628	9.33633	5.53048e-07
2410081M15Rik	-0.479567	9.43217	9.32749e-05
5830468K18Rik	-0.479297	9.15026	0.00231335
Arl2	-0.479037	9.94628	0.000486406
Trrp2	-0.479025	8.95067	9.25736e-08
D330016G23Rik	-0.478971	8.49877	5.18487e-06
Uaca	-0.478817	11.1773	5.44725e-05
Icam1	-0.478643	10.1239	0.0018115
1700129I04Rik	-0.478114	8.51958	1.06316e-07
Usp11	-0.477762	8.67502	7.89392e-08
Ift81	-0.477164	9.18371	6.17173e-11
Chchd4	-0.476216	11.0219	5.18236e-09
Twistnb	-0.475979	9.82525	6.61133e-09
Stat4	-0.475901	8.35833	1.29478e-08
1810037G04Rik	-0.475724	9.84357	6.68259e-08
Brrn1	-0.4757	10.1437	7.17113e-07
LOC382087	-0.475385	9.61705	1.40391e-06
Gm169	-0.4752	10.0327	7.27786e-06
Pgpep1	-0.474387	9.47447	3.90481e-09
Lamc1	-0.473657	10.558	0.00794523
Kif2c	-0.473326	11.5822	6.87725e-08
2510015F01Rik	-0.473165	12.2591	0.00010683
2410006F04Rik	-0.472914	8.82997	1.03045e-07
Mcm2	-0.4717	12.0476	1.6332e-08
3110009E18Rik	-0.471444	10.4348	0.0138261
Gpx4	-0.471253	13.0066	0.000476758
Pprc1	-0.471099	11.8381	7.81217e-11
Gyltl1b	-0.470625	9.45749	6.19234e-06
4930455G09Rik	-0.470319	8.1843	3.59022e-06
Srfbp1	-0.470057	9.31409	8.10511e-11
Csnk2a1-rs3	-0.469915	10.7953	1.51267e-06
Acsl1	-0.469874	8.8522	5.6229e-08
Tubg2	-0.469333	8.86286	9.34996e-09
2410015N17Rik	-0.468084	12.0851	3.00474e-05
Nup88	-0.467859	11.5442	1.53827e-08
Gtf2f2	-0.467585	12.0708	1.90814e-07
Tnrc6c	-0.466809	9.28628	3.82843e-08
2610111M03Rik	-0.466634	9.06104	3.59382e-08
Egfl7	-0.466184	10.0532	2.06273e-11
Mre11a	-0.465661	9.67108	1.03242e-10
Galnt2	-0.465521	10.1117	2.74442e-06
Mrpl10	-0.465305	11.7622	2.10209e-09
Rwdd2	-0.46516	8.62094	4.57588e-06
Tmem38b	-0.465146	10.3257	0.000456964
Serping1	-0.464739	8.89551	1.89703e-06
Ralbp1	-0.464429	11.7968	2.67601e-06
scl0002759.1_7	-0.464266	9.53004	2.59599e-06
Mrpl30	-0.464191	12.1027	0.0211789
Tgm2	-0.464142	8.60098	5.30875e-05
AU024582	-0.463743	11.2002	0.00727479
Cdc42ep2	-0.46372	8.33869	1.23847e-10
2310050B20Rik	-0.463642	10.012	5.13659e-08
Mvd	-0.463504	9.57056	9.87729e-06
2310047B19Rik	-0.463483	9.7151	2.8569e-09
Seh1l	-0.463353	9.89829	3.10685e-09
Serpinf1	-0.46285	9.18848	0.015369
Cox8a	-0.46281	13.1592	2.37531e-07
2810017I02Rik	-0.462351	10.4986	1.6605e-07
1110003E01Rik	-0.462178	10.694	1.54316e-05
Tipin	-0.462175	11.2698	1.27811e-09
G3bp2	-0.462095	13.8467	7.6712e-06
1700028N11Rik	-0.461703	8.44557	8.96177e-07
Mum1	-0.461268	12.1339	9.4122e-08
Ubtf	-0.461143	9.49801	6.77742e-09
Hist2h2be	-0.460629	10.7186	0.0223891
Ildr1	-0.460462	8.47756	6.87854e-10
Eif2s2	-0.46039	12.3701	0.00446318
scl0002445.1_75	-0.459969	8.67081	4.94157e-09
Mrps30	-0.459906	12.5824	4.65906e-07
Rtn4ip1	-0.459752	8.98682	2.38508e-07
Grcc10	-0.459712	10.8094	1.58248e-05
Stc2	-0.459533	9.36569	0.000207719
Mrpl1	-0.458995	9.8188	6.76158e-07
Hist1h3b	-0.458898	11.2617	0.0179352
Nup43	-0.458504	12.7364	3.03839e-06
Nphp4	-0.458191	8.69422	3.63995e-06
1110020K19Rik	-0.458137	9.54123	2.13213e-08
4632411B12Rik	-0.457957	9.51396	0.023154
Thumpd3	-0.457774	10.6548	9.07521e-07
BC050210	-0.457716	8.33569	0.0013652
Hey1	-0.457688	8.6752	1.01577e-07
2010005E20Rik	-0.45751	8.47886	1.05165e-07
Akap11	-0.456959	9.35918	6.10813e-07
2310056P07Rik	-0.456827	12.6783	1.92745e-05
AI597479	-0.456799	9.56093	0.00980342
Gaa	-0.456792	9.19637	1.13359e-06
4732462B05Rik	-0.456757	11.2191	6.39967e-05
Fahd1	-0.456599	9.8807	2.34751e-06
Gars	-0.456125	15.2498	7.49334e-08
1110002N22Rik	-0.455989	10.8777	0.000397307
LOC230824	-0.455542	8.43777	4.04223e-08
Wbscr22	-0.454653	10.41	5.34773e-09
Fntb	-0.454445	12.7461	0.0015048
BC019806	-0.453608	10.2004	0.000100175
Acot8	-0.453576	9.39746	4.35151e-11
3230401I01Rik	-0.453397	9.59315	1.34376e-10
Ing3	-0.452767	9.21703	1.56296e-09
Exosc8	-0.452655	10.5338	4.03793e-06
1700019D06Rik	-0.452247	9.36813	3.24472e-07
Kdelc1	-0.452204	9.52802	0.00321001
Hist1h2ah	-0.451845	14.4478	1.51263e-10
4833420G11Rik	-0.451699	10.8766	2.29595e-05
Oxct1	-0.451443	10.7907	0.000375991
5630401D06Rik	-0.450903	10.4379	3.03685e-07
Mt1	-0.450658	15.6611	1.02722e-06
Pdyn	-0.450576	8.32621	2.23459e-09
Bcl7a	-0.450248	10.0355	1.01077e-06
D15Ertd682e	-0.449639	9.20337	6.85912e-07
Gemin4	-0.449382	11.3708	5.38622e-08
BC055811	-0.449143	8.22977	0.0183376
Rnaset2	-0.449102	11.5442	2.02501e-07
Eml4	-0.44871	10.4367	1.83735e-07
A130047F11Rik	-0.448152	8.42126	1.54361e-07
Ilf2	-0.447618	12.1466	9.33505e-09
1700024G10Rik	-0.447062	8.30648	0.000678821
Rabggtb	-0.446523	12.1261	3.41309e-07
Arrdc3	-0.446469	9.88801	5.94554e-08
H2afx	-0.446112	12.8387	2.48813e-05
A630098G22Rik	-0.445696	8.73186	2.76405e-07
Dido1	-0.445691	9.08673	7.639e-09
4833424P18Rik	-0.445647	10.2528	4.7714e-08
A230005G17Rik	-0.44525	8.49215	2.22751e-09
Slc25a26	-0.444693	9.19207	7.49497e-08
4921509E05Rik	-0.444537	8.57368	9.24406e-10
4432411E13Rik	-0.444261	9.30784	1.73098e-06
A530088H08Rik	-0.444209	8.35337	0.000228794
Pfc	-0.44391	9.46545	6.88184e-06
D330001F17Rik	-0.443338	9.85021	0.000799567
A030007L17Rik	-0.443125	9.21597	3.39707e-06
Iqgap3	-0.442537	9.26977	0.00135422
Sec14l1	-0.44244	8.59093	8.23678e-10
4931440B09Rik	-0.442033	8.43636	0.00029972
9330134C04Rik	-0.441953	10.167	1.96424e-07
2310002B06Rik	-0.441844	9.70614	3.90003e-08
C130052O15Rik	-0.44169	9.35654	2.75819e-05
Gmppa	-0.441287	9.33941	0.00197735
Gcn5l2	-0.440833	10.1784	1.21262e-06
Rabggta	-0.440508	9.2443	3.70268e-07
BC038881	-0.440385	8.48735	3.22677e-09
Tjp3	-0.440297	8.7236	0.0184385
Celsr3	-0.439955	8.64806	2.61853e-05
R3hdm1	-0.439747	10.8113	0.0153766
Hexa	-0.439676	9.97341	0.0126195
scl00001.1_0_REVCOMP	-0.439563	8.46353	3.83197e-07
A630082K20Rik	-0.439449	9.116	3.5228e-11
4833421E05Rik	-0.439397	9.64396	1.95237e-07
5830412B09Rik	-0.439329	10.1812	1.39575e-05
Ipo8	-0.439325	9.63747	3.23066e-07
Brca2	-0.439316	9.12433	4.24194e-09
Camk2b	-0.438928	8.93255	0.00243174
Tusc4	-0.438882	9.85473	4.31005e-06
Trim25	-0.438834	10.0161	2.82417e-07
1810045K06Rik	-0.438797	10.5573	0.0220024
Sc4mol	-0.438327	11.2853	5.54038e-07
6330411E07Rik	-0.438185	8.42961	6.76121e-09
Sdcbp2	-0.438125	8.41795	3.33613e-12
Gmfg	-0.438009	9.16388	0.000688914
1700019H03Rik	-0.437965	8.59646	5.89146e-05
Foxp1	-0.437955	9.05167	2.27179e-08
Gzf1	-0.437831	9.43123	1.80206e-06
Prdx2	-0.437678	12.5242	1.45398e-05
Lsm7	-0.437376	13.0002	2.43457e-08
Cpsf5	-0.437345	12.206	3.84995e-05
Eif4a2	-0.437327	13.0115	0.0209554
Ctsz	-0.436851	8.72478	1.53178e-08
Slc11a1	-0.435727	9.2043	7.79933e-06
Sgk2	-0.435211	8.22524	5.5058e-09
Mtbp	-0.434687	9.80325	1.48835e-10
ZBTB45	-0.434664	9.18501	1.04205e-07
Bbs2	-0.434226	8.6148	1.3823e-06
Ppp2cz	-0.434187	8.62756	4.12425e-09
Hnrpa0	-0.434003	10.7839	1.64423e-06
Abcf1	-0.433736	11.3304	2.43053e-09
Lrmp	-0.433567	8.50669	0.00157085
LOC240023	-0.433375	8.71257	2.54497e-06
Nol6	-0.432951	10.5292	1.60461e-07
Lyplal1	-0.432872	8.59491	2.47899e-05
Prpf40b	-0.432758	8.88755	3.12838e-11
Gstk1	-0.432513	8.74374	2.64709e-05
Oxsr1	-0.43233	9.15377	7.13465e-08
2700007B13Rik	-0.431666	8.71124	2.2991e-08
Ccdc53	-0.431394	10.1088	4.61346e-08
Lmtk2	-0.43132	10.7982	0.00204652
AW050020	-0.430829	8.85923	7.99458e-05
LOC380871	-0.430403	9.77785	1.84557e-05
3230401M21Rik	-0.43034	8.4923	1.58637e-10
Smarcad1	-0.430079	10.9955	1.29091e-05
Slc43a1	-0.42962	9.02714	0.0135382
Ide	-0.429581	11.1464	1.1039e-05
Ccrk	-0.429506	8.49876	3.58584e-12
Dbp	-0.42912	9.29141	5.54037e-06
9430023P16Rik	-0.429007	11.0109	0.0244478
Psmc3ip	-0.428707	11.5468	9.02143e-06
Azi1	-0.428654	9.14873	2.11549e-06
Grb7	-0.428086	11.8725	0.000920124
1700024K14Rik	-0.428063	8.69983	1.46758e-07
Stip1	-0.42791	13.2257	7.8835e-06
Med25	-0.42775	11.7946	1.71113e-06
Zfp428	-0.427664	9.84225	2.72128e-05
Hes6	-0.427549	9.70607	0.000213722
D030027P05Rik	-0.42716	8.81585	1.03591e-07
Snrp70	-0.427087	10.526	1.91545e-07
Fance	-0.426839	9.4953	1.41255e-05
4833426J09Rik	-0.426703	9.42436	5.41549e-06
Tspan17	-0.426581	9.21747	0.000210046
1500012F01Rik	-0.426426	12.4718	4.30742e-05
Pdha1	-0.426415	12.7569	1.0434e-06
Statip1	-0.426287	11.16	5.4445e-09
Espl1	-0.42587	9.19544	5.4657e-08
scl0004166.1_8	-0.425852	10.5081	0.00115643
Mras	-0.425668	8.42763	2.40425e-08
Siva	-0.425355	13.4754	5.52135e-09
4933407C03Rik	-0.424971	10.0467	1.08301e-07
Pccb	-0.42437	8.55567	1.38406e-08
Iqgap2	-0.424349	8.97157	2.02268e-05
Chst8	-0.424192	9.15016	1.45222e-05
Me2	-0.424152	9.254	2.29545e-09
Actl6a	-0.424067	10.2384	3.45798e-05
Polr3g	-0.423815	10.0878	9.11065e-06
LOC385659	-0.423633	8.90879	2.40701e-07
Dhx32	-0.423622	11.1061	4.62615e-06
Gstt2	-0.423384	9.06286	0.000450792
1700026B20Rik	-0.423358	9.4487	1.4934e-09
Mrps35	-0.423327	11.4622	9.76895e-06
Pus3	-0.423282	9.863	6.98545e-05
Mcph1	-0.422942	9.22747	6.864e-11
AW413632	-0.422727	9.17318	3.30114e-08
0610031G08Rik	-0.422441	8.53736	1.39003e-06
Dars	-0.421922	12.4027	0.0243894
Vars	-0.421586	10.9425	2.33553e-10
1700013B16Rik	-0.421406	8.46574	0.0035946
4732435K05Rik	-0.421273	8.76445	1.24939e-05
Trit1	-0.420861	9.07566	1.46164e-09
A730082L10Rik	-0.42082	8.77049	2.00307e-05
Pml	-0.42063	10.6066	0.00625016
B230387C07Rik	-0.420437	10.4068	0.00011334
Nos3as	-0.420404	9.17933	0.000119456
LOC383809	-0.420313	8.47583	0.00331217
U2af1	-0.420306	10.5316	6.19402e-08
Aarsd1	-0.419981	9.78689	0.000186739
1810020D17Rik	-0.419948	9.52026	4.89136e-05
Aatf	-0.419924	9.92993	1.08752e-07
Acp6	-0.419841	11.512	0.00154713
KIF23	-0.419836	11.388	1.47143e-08
Hist1h2an	-0.419332	13.4436	6.20813e-06
EG622339	-0.418719	15.4005	7.96681e-07
Pygb	-0.418707	9.31413	2.38508e-07
Myg1	-0.418422	10.0192	3.82925e-08
Chaf1a	-0.418117	10.4642	1.94752e-05
1810014F10Rik	-0.417948	10.7704	9.02143e-06
LOC239102	-0.417585	9.67879	0.0117237
Spg21	-0.417487	10.939	6.69811e-06
2410080I02Rik	-0.417411	8.78304	3.81225e-07
Ndufv1	-0.417255	13.0918	2.43434e-06
2310022K01Rik	-0.417229	9.05964	2.2991e-08
Exosc2	-0.417024	10.9788	0.000150485
Noc2l	-0.416952	11.7836	2.36011e-08
Nup62	-0.416749	12.2806	3.43131e-05
Rdbp	-0.416676	11.5564	2.15271e-07
scl0003519.1_175	-0.416566	8.4099	3.2927e-07
E130107N23Rik	-0.416351	10.4262	6.80063e-08
scl0002540.1_6	-0.416142	10.0974	0.0131369
Smoc1	-0.416119	8.90358	5.8845e-06
Cenpa	-0.416004	14.7041	5.15186e-07
E130306D19Rik	-0.415656	9.47883	1.56992e-05
C230081A13Rik	-0.415605	8.31938	8.26031e-09
Ndufa9	-0.41552	12.661	6.33729e-06
BC035954	-0.415095	9.1635	5.0492e-06
Fchsd2	-0.415021	9.79771	1.98062e-07
Mfge8	-0.414938	12.6714	2.55639e-05
A730063M14Rik	-0.41485	9.21134	3.20627e-09
Mrpl22	-0.414351	11.0491	2.57601e-07
Brwd1	-0.41426	9.34626	1.78279e-06
D11Ertd707e	-0.414236	10.9348	1.7112e-07
9330175B01Rik	-0.414111	10.3962	1.06446e-06
Ass1	-0.413845	10.8996	0.00234733
Set	-0.413787	10.0347	3.30143e-05
H2afv	-0.413769	11.7601	2.1436e-08
Clstn3	-0.413707	8.59649	1.12649e-06
B430114K07Rik	-0.413335	8.30234	1.56246e-09
Ivd	-0.41324	9.04865	4.29666e-08
Rsrc2	-0.413045	11.5918	1.32741e-05
Ccdc5	-0.412639	9.39093	5.44573e-06
Pnma2	-0.412585	10.7208	3.31243e-07
Ctcf	-0.412545	10.1125	2.93159e-08
Hdhd1a	-0.412522	8.23152	0.0383441
B430110C06Rik	-0.412182	8.38647	1.20173e-09
Ift88	-0.411864	9.10985	5.8238e-08
Dnmt1	-0.411726	10.9538	0.000132206
Gstm6	-0.411711	8.46113	2.02146e-07
Prpf3	-0.411554	10.5588	8.33295e-05
C920006O11Rik	-0.411216	8.91151	0.000563259
Cla3	-0.411153	8.76603	6.21894e-07
LOC380875	-0.411138	10.6773	0.000101392
Jak3	-0.411115	8.43011	1.41599e-08
Plekhb1	-0.411049	8.48366	2.22625e-07
Nckipsd	-0.410354	8.75932	7.42844e-06
Fgfr1op	-0.410232	8.94928	9.29423e-08
Ddx41	-0.410094	11.512	3.94409e-09
Aars	-0.409857	12.3317	5.97397e-09
Syngr1	-0.409782	8.95167	4.6719e-05
1110017D15Rik	-0.409022	8.59841	0.011957
Bcs1l	-0.408831	9.9029	0.00280019
A630049A05Rik	-0.408721	8.85594	2.33642e-10
Got1	-0.408518	8.50625	6.80624e-08
Snx8	-0.408384	10.2905	9.54529e-07
Diap1	-0.40802	9.10259	3.12121e-06
B230208H17Rik	-0.40775	9.81282	5.09355e-08
Ctnnbl1	-0.407537	10.096	1.7935e-06
E430031D18Rik	-0.407443	10.3876	5.07905e-06
B930074N03Rik	-0.407345	9.65879	1.92256e-05
4930521E07Rik	-0.407248	8.55158	6.09283e-10
Mkrn3	-0.406822	9.75067	6.10606e-06
Ift140	-0.406583	8.71449	5.81153e-10
Galm	-0.406487	8.449	1.37477e-06
Plvap	-0.40645	8.68287	2.42587e-05
LOC225033	-0.406362	12.6542	0.00739044
A230058N16Rik	-0.406322	8.49901	2.73891e-07
M32486	-0.405906	8.52158	3.1026e-07
Hint2	-0.4059	11.1622	1.39892e-06
Wbp2	-0.405445	13.9294	7.65442e-05
Polh	-0.40514	8.98203	6.08083e-05
Recc1	-0.404838	11.7347	1.20631e-07
Coq6	-0.404721	10.2684	1.16091e-07
Pip5k2a	-0.404677	9.39456	3.58153e-06
Mrps21	-0.404612	10.8405	5.11312e-05
Med18	-0.404179	9.89721	3.75829e-07
Slc1a5	-0.403971	8.5871	2.37531e-07
Cecr5	-0.40394	8.74451	1.64873e-09
D130060L11Rik	-0.403808	8.8969	2.29598e-08
C80879	-0.403363	9.45022	0.0116368
Smyd5	-0.40321	9.55692	3.91706e-08
Polg2	-0.403144	8.81973	2.31779e-09
Cox7a1	-0.402688	10.6289	0.000351889
Was	-0.401825	8.32426	8.20661e-05
Zfp553	-0.401605	9.35924	2.35732e-06
LOC382245	-0.401356	9.70811	1.5481e-05
2810428C21Rik	-0.4009	9.2199	5.41795e-05
Hsp105	-0.400777	11.0965	1.7195e-05
Tfam	-0.40032	10.6263	9.32889e-06
LOC230872	-0.400286	8.5104	1.12927e-07
2810409H07Rik	-0.400232	11.1488	2.60576e-05
Afg3l2	-0.399791	8.86303	2.55485e-07
Dhx35	-0.399708	9.03959	8.1069e-10
4930429O20Rik	-0.399499	8.41126	1.40579e-06
Vldlr	-0.399416	8.80152	1.16873e-08
Gm592	-0.399355	9.33335	2.50869e-05
Rars	-0.399066	11.5998	2.68264e-06
Acd	-0.398432	11.3148	5.80495e-07
1100001D10Rik	-0.398281	10.1726	9.36123e-06
Arnt	-0.397714	9.30701	3.06896e-08
2010110K16Rik	-0.397124	10.9234	5.26838e-05
Slco4a1	-0.396996	8.76202	2.83441e-08
Ppie	-0.396906	10.1124	1.69996e-08
Amdhd2	-0.396745	9.27497	4.52911e-06
Ndufs7	-0.396662	12.6473	1.0396e-06
LOC380705	-0.396585	8.68099	4.18133e-06
Nxt1	-0.396471	9.83399	3.96505e-07
BC066028	-0.396165	9.85259	6.31392e-07
D2Wsu81e	-0.39607	8.84854	1.3287e-05
B230219D22Rik	-0.396037	9.95574	1.27019e-05
Hagh	-0.395941	9.75055	3.38486e-05
Umps	-0.395803	10.166	1.51826e-07
6720463M24Rik	-0.395646	9.97054	1.69141e-05
Atad3a	-0.395372	11.7117	1.66439e-05
Mrps28	-0.395345	11.2162	1.34892e-05
Nrd1	-0.395054	12.2615	1.19828e-06
Zfp143	-0.394828	8.99823	0.000147966
Tnfaip8	-0.394808	8.89202	0.00411388
1700021C14Rik	-0.394798	10.3319	0.000761653
Zfp263	-0.394312	10.0893	2.263e-06
Fnip1	-0.39425	10.0264	0.000376795
D130059O18Rik	-0.39398	8.80506	1.00627e-07
Rpp38	-0.393974	9.23211	0.000501174
Birc2	-0.393812	9.74494	5.20644e-07
0610010K14Rik	-0.393353	9.88002	8.93956e-06
Anp32e	-0.393098	11.5179	9.06155e-05
Cutc	-0.392988	9.3127	1.76337e-08
Centa1	-0.392981	8.32762	8.21077e-05
D5Ertd585e	-0.392924	9.78809	7.81443e-05
4931428F04Rik	-0.392854	8.27141	1.19516e-10
Polr3b	-0.392659	10.5105	3.25523e-06
Xrcc2	-0.392646	8.72427	1.78436e-09
1700022C21Rik	-0.392475	8.83268	3.95139e-06
Usp21	-0.391975	9.32759	0.00267361
Atp5h	-0.391901	13.2304	4.1021e-08
Fbln1	-0.391746	8.90932	0.000161454
Hist1h2ak	-0.391067	14.7273	7.33643e-08
Dolpp1	-0.390976	9.3275	0.000333663
Ebp	-0.390882	9.13091	1.30768e-05
LOC224276	-0.390878	11.2364	0.00218803
Zc3hdc3	-0.390496	9.19085	2.2666e-07
Zc3hdc6	-0.390429	8.48176	1.27459e-05
Hook2	-0.390069	8.84635	0.00127746
4631410M14Rik	-0.390028	8.63424	1.57371e-05
Siah1a	-0.389559	9.47929	7.02786e-06
Sox12	-0.389383	9.79253	3.54763e-05
AU020206	-0.388813	9.32282	9.71733e-07
Prmt3	-0.38866	12.6053	0.00373162
2510005D08Rik	-0.388133	10.2559	0.000421914
Brf2	-0.387313	9.79068	6.84954e-10
scl0002864.1_26	-0.387106	8.22332	8.10287e-08
LOC385492	-0.386851	8.64749	4.19306e-09
A530089A20Rik	-0.3868	12.2733	1.38473e-05
Ppef2	-0.386235	8.33046	1.23461e-06
Rbm8	-0.386226	10.2471	2.74301e-05
Pias4	-0.386113	10.4104	1.16639e-06
Trim8	-0.385495	11.7684	0.000810892
D4Bwg1540e	-0.385445	8.18361	2.96391e-09
scl000408.1_6	-0.385416	11.385	0.00335267
Mical1	-0.385309	8.33393	4.49911e-08
Col9a2	-0.385132	8.5315	1.16438e-06
C330006M04Rik	-0.385091	8.53862	7.29849e-05
Slc45a4	-0.384938	9.43505	1.51978e-05
Gpr125	-0.384302	11.0138	0.000138218
Ccne1	-0.384285	9.9178	0.000102182
8030474H12Rik	-0.383409	8.7117	1.47583e-07
Wdhd1	-0.383324	9.29826	1.44033e-05
Ankrd10	-0.381966	9.13689	8.03562e-06
5730527J01Rik	-0.381686	10.4609	1.56962e-06
DXImx40e	-0.381387	9.69318	6.59651e-07
Pnkp	-0.381229	10.4239	3.32548e-05
LOC245670	-0.381059	8.71963	1.11136e-07
Fbxo21	-0.381035	10.6472	7.10224e-06
Spred1	-0.381023	10.7881	0.000412672
1110001A23Rik	-0.381014	9.66212	0.000148465
Idb2	-0.380947	9.61814	0.00103702
Rad51ap1	-0.380888	9.00203	1.06043e-07
Luc7l	-0.380267	10.5149	5.57352e-07
Fancd2	-0.379922	9.87913	6.99864e-09
Pxmp4	-0.379824	8.53776	4.03793e-06
LOC381200	-0.379618	9.19402	5.01214e-06
2610528E23Rik	-0.379592	9.21949	6.99103e-06
2310035K24Rik	-0.3795	8.74249	6.74077e-08
Pip5k2b	-0.379493	9.914	1.26336e-06
Sat2	-0.379449	8.44926	1.56419e-07
Plekhh1	-0.379308	10.2872	0.000917692
Ntan1	-0.379286	11.1022	0.00193262
3010015K02Rik	-0.379147	9.09026	2.02419e-05
1810032O08Rik	-0.379032	10.0738	6.79496e-08
Cep72	-0.379011	8.66086	8.68729e-06
Cd1d1	-0.378659	8.47958	2.87423e-05
Smpd2	-0.378287	8.5805	7.83638e-06
Rps6	-0.378096	14.0528	6.63843e-07
Ndufs2	-0.378051	10.2052	0.0139418
Dnd1	-0.377673	9.80372	2.7603e-06
0610039D01Rik	-0.377668	10.3635	1.27204e-07
Snrpd1	-0.377649	12.9297	1.42329e-06
Pabpn1	-0.377549	14.1642	2.24987e-05
Ard1	-0.3775	12.1145	1.45265e-08
Cdk2	-0.377461	10.9533	1.55046e-08
Pim3	-0.377334	11.9863	5.56655e-05
1110008J03Rik	-0.377181	8.43029	3.12838e-11
Ifrg15	-0.377085	8.61059	0.00214029
Ttc14	-0.376937	9.35613	1.74869e-06
1110004P21Rik	-0.376926	9.5935	1.28482e-05
LOC381259	-0.376566	9.58041	0.00544165
Zswim3	-0.375924	9.36743	4.42906e-07
2700091N06Rik	-0.37591	10.1066	1.31181e-05
9130416N05Rik	-0.375198	8.49256	0.000180858
LOC269515	-0.375015	10.3142	1.41838e-06
9530058B02Rik	-0.374962	8.64675	4.79851e-08
Pitpnb	-0.37481	11.348	1.09942e-05
2610021K21Rik	-0.374713	8.6462	6.10239e-09
E2f2	-0.37471	8.47621	1.64721e-05
Nol3	-0.374593	8.61888	2.56447e-08
6030458C11Rik	-0.374441	9.43662	1.32467e-05
2700017M01Rik	-0.374403	11.0942	4.58492e-06
Fuk	-0.374371	8.91299	1.50801e-07
Haghl	-0.374325	8.91219	0.000203555
Tnrc15	-0.374273	9.10356	0.0131839
2310004L02Rik	-0.373452	10.1788	2.59376e-06
Mars	-0.373414	9.99934	1.76472e-06
Incenp	-0.373383	10.6709	4.83624e-05
BC044804	-0.37324	8.4609	9.32123e-07
Smarcd2	-0.373052	11.0562	5.74535e-06
Hist1h2ad	-0.373016	14.4524	9.49281e-07
4930449E07Rik	-0.372848	8.3117	1.82863e-09
Saa3	-0.372765	8.43511	1.55074e-06
Myo10	-0.37238	9.40607	0.000229196
BC039161	-0.372191	10.2055	0.000492902
1110020P15Rik	-0.371504	14.4104	1.95778e-07
Ribc1	-0.371418	9.18144	0.00191
Rcor1	-0.371406	8.6831	0.000163683
Phox2a	-0.371395	8.72424	0.00740401
Sfrs3	-0.371177	10.1621	1.19022e-07
Hic2	-0.371112	10.7178	4.51957e-07
Bcl6	-0.370684	8.67262	6.83087e-05
Ddx58	-0.370677	8.92975	4.01599e-05
Qtrt1	-0.370669	10.0374	0.000174463
Mcl1	-0.370628	12.5284	0.00011955
Ctbp2	-0.370538	10.2995	5.22015e-07
Slc7a5	-0.370348	13.1635	7.45255e-05
LOC234882	-0.369961	13.3835	4.34658e-06
Fdxr	-0.369927	8.4437	5.38628e-10
Ube1c	-0.369765	9.78625	0.000173521
Slc25a5	-0.369344	14.697	5.89908e-07
Prodh	-0.369093	8.91687	7.86078e-07
Hist1h2ai	-0.368887	15.2137	8.48608e-06
A530065H22Rik	-0.368709	10.2151	0.000201161
Rab11fip4	-0.368568	8.68447	8.45375e-05
Mapk13	-0.368464	9.48984	0.0316187
Cdc14b	-0.368381	9.06845	2.80326e-07
D19Bwg1357e	-0.368367	13.1538	1.05766e-05
LOC328932	-0.368364	8.47175	9.87902e-09
Fpgs	-0.368229	10.4975	3.71472e-05
Usp1	-0.36801	9.59011	3.01269e-07
Isgf3g	-0.367662	8.64417	5.92863e-09
Ankrd25	-0.367619	8.82933	0.000254812
Gbl	-0.367541	10.1025	5.3768e-09
Cdca5	-0.367322	10.2822	1.78186e-06
0610007P14Rik	-0.367309	10.4983	4.351e-07
Slc12a7	-0.367289	8.42191	1.77287e-08
3000003F02Rik	-0.367068	9.224	2.2961e-05
Csda	-0.367009	10.3368	1.7688e-06
Mapk3	-0.366882	8.45053	1.98829e-08
Atp5o	-0.366824	13.0807	2.10671e-06
P38ip-pending	-0.36679	8.51164	3.06896e-08
Hspa9	-0.366271	14.2897	1.84669e-06
Zfp451	-0.366007	9.43701	0.00979913
Def6	-0.365913	9.26365	9.31065e-05
A230021I18Rik	-0.365905	8.16393	5.24379e-11
Fbxw5	-0.365705	10.7896	1.45265e-08
D11Wsu47e	-0.365687	9.76886	2.76769e-06
BC038822	-0.36564	8.60972	1.6104e-07
Soat2	-0.365411	8.40543	8.26544e-08
6430601A21Rik	-0.364867	8.94654	4.71039e-07
Cyc1	-0.364765	12.6505	1.24504e-06
Hist1h1b	-0.364565	8.40762	2.10149e-05
Rnf31	-0.364505	8.69668	2.73793e-06
Nol8	-0.364285	11.3272	1.67787e-07
Cpsf1	-0.364109	9.3633	2.05843e-06
3830431G21Rik	-0.363944	9.20056	7.05745e-07
D1Bwg0491e	-0.363775	9.62406	0.0203678
Fnbp1	-0.363486	9.20612	4.58935e-07
BC009118	-0.363043	9.89707	1.872e-05
Magmas	-0.363014	9.52507	2.39537e-06
2410012H22Rik	-0.362948	10.3955	9.79197e-06
Neu1	-0.362198	10.8287	0.0006894
Gnl3	-0.36187	12.8678	0.000115761
Pdk4	-0.361306	8.427	9.12502e-09
D15Wsu169e	-0.361202	9.00212	9.53044e-05
4921532D18Rik	-0.361117	10.293	9.96248e-05
Selenbp1	-0.360633	8.19343	2.51985e-06
Bre	-0.360576	9.41455	2.26375e-08
A430096A09Rik	-0.360415	8.36855	1.97344e-07
2410001E19Rik	-0.36034	11.0485	1.92286e-05
Nme7	-0.360205	10.435	0.00102661
0610011F06Rik	-0.360171	9.01788	0.000183326
9830165L15Rik	-0.359944	8.82633	1.43435e-06
Dnajc4	-0.359831	8.82067	0.000282491
E530004K11Rik	-0.359639	8.10737	1.0281e-09
LOC328752	-0.35944	11.6105	2.15583e-06
Ndufaf1	-0.359123	10.4625	4.15879e-06
scl0002337.1_39	-0.359095	9.23281	8.23642e-06
Ppat	-0.358743	9.54624	1.95582e-06
2210021J22Rik	-0.358572	8.84112	4.37845e-09
4930572J05Rik	-0.358165	9.8212	8.25912e-07
Arhgap4	-0.357863	8.42266	6.896e-08
Tyms-ps	-0.357592	11.4489	0.000402232
D030056L22	-0.357231	13.2022	0.000292355
Izumo1	-0.3571	8.32792	2.20927e-06
E030013B01Rik	-0.356842	8.57755	0.00375346
Dnajc19	-0.356835	12.3543	1.15571e-05
4933424M23Rik	-0.356662	12.2136	1.04177e-05
Mphosph1	-0.356508	10.0302	5.81398e-06
Prss19	-0.356101	9.02438	0.000247702
Rnf10	-0.356038	12.0396	3.19372e-05
Hsd17b4	-0.355721	11.5718	0.000494547
Vpreb3	-0.355718	8.18032	8.21934e-09
A230070D14Rik	-0.355487	8.85113	5.62481e-06
1600016N20Rik	-0.355468	8.74259	6.64202e-06
Glo1	-0.355219	12.6677	8.90194e-06
1810047C23Rik	-0.355153	9.61336	3.12666e-05
2600001B17Rik	-0.3551	9.75152	7.62377e-06
Zbtb24	-0.354908	9.66567	8.35364e-07
Plxdc1	-0.354745	8.31205	4.91071e-09
Nup133	-0.354397	10.769	2.40598e-05
2810417H13Rik	-0.354043	10.1909	0.0125939
1700067K01Rik	-0.353818	8.44449	0.000270285
Mapk8	-0.353774	8.60322	1.3612e-06
Akap1	-0.353644	8.96218	4.62155e-10
5730494M16Rik	-0.35363	8.71049	1.55844e-06
Phpt1	-0.353372	10.8737	6.86321e-06
Fads1	-0.353238	12.2423	8.46053e-05
Uqcrc2	-0.353033	13.536	0.000164219
Erf	-0.352821	8.48957	0.000381774
Napb	-0.352755	8.62982	1.73584e-05
Rbpms	-0.352746	10.6583	5.40249e-07
9930033H14Rik	-0.352468	8.84064	1.2023e-07
Fbxo36	-0.352271	8.54058	0.00408085
Prim2	-0.352199	9.50303	0.0245908
2810439M11Rik	-0.351769	8.93427	1.01043e-05
9230108M03Rik	-0.351724	9.04515	9.29463e-07
Adam23	-0.350856	8.23961	2.39725e-05
Ly6g6d	-0.350778	8.23546	6.78143e-06
Frs3	-0.350617	8.38201	6.30044e-05
Gnb1l	-0.350491	8.90526	9.43304e-07
Cog6	-0.35018	9.84012	1.46749e-06
Cib1	-0.350089	10.8265	7.07108e-06
Pex11a	-0.349842	8.63549	1.09822e-06
2310014H19Rik	-0.349207	9.03142	3.1424e-07
LOC333744	-0.349166	11.1236	0.00866642
Ndufs8	-0.349033	12.0314	7.36016e-06
4933412A02Rik	-0.348737	9.53403	6.13748e-05
Rad23b	-0.34856	9.7929	2.0998e-09
Gprc5b	-0.348505	8.362	0.000611648
Rae1	-0.348221	12.0507	3.40376e-06
Tens1	-0.347719	9.66368	4.97455e-06
5033413D16Rik	-0.347697	10.9736	0.034878
Thrap6	-0.347383	12.0526	2.52911e-05
Ndufc2	-0.347057	11.4645	4.01917e-05
Pfkm	-0.346981	9.92303	0.00948979
Supv3l1	-0.346675	9.90123	6.27705e-05
Snx2	-0.346405	11.864	0.0020284
Dhx34	-0.34617	8.8438	9.39577e-06
Hemk1	-0.346134	9.06839	9.24264e-05
Rab4b	-0.346117	8.69298	2.07338e-07
Adck5	-0.346108	9.16013	8.85822e-07
LOC215999	-0.345686	8.57615	6.69387e-06
Fmip	-0.345482	10.8057	1.30519e-06
C730026J16	-0.34542	10.4286	3.81773e-06
Alox12b	-0.345405	8.23924	4.83337e-05
Lyar	-0.344921	9.36438	2.40161e-05
Mrps12	-0.344707	12.5434	3.02691e-06
Mrpl40	-0.344652	11.9998	0.000117408
3000003G13Rik	-0.344606	9.53361	9.61597e-06
Tmem60	-0.344519	11.1596	0.00166826
AA408296	-0.344366	9.06313	0.00980935
2310003H01Rik	-0.344188	9.64124	3.01531e-06
Edd1	-0.343451	12.6154	4.2836e-07
Etsrp71	-0.34343	8.85319	2.24109e-06
LOC380888	-0.343089	8.53875	1.02544e-05
Mcf2l	-0.34297	8.43976	3.84015e-09
Nup205	-0.342908	12.9056	0.000576674
2900045G02Rik	-0.342892	8.40408	2.05126e-08
4930556B16Rik	-0.342845	8.57806	4.85125e-09
Pctk1	-0.342764	10.1612	1.51404e-05
LOC380906	-0.342198	9.05186	0.000135978
1500011K16Rik	-0.342023	10.3815	0.000156021
Carm1	-0.341997	9.48513	7.19029e-08
Hspcb	-0.341719	13.9166	5.19656e-06
Nudt8	-0.341617	9.18435	0.000168912
Zfp42	-0.341334	10.3878	0.000419457
LOC381439	-0.341324	11.1512	0.0307773
Dhrs10	-0.341214	8.63508	0.000943285
Eftud2	-0.340908	11.0158	5.50675e-08
Tcof1	-0.340703	9.63987	3.16773e-05
1810054D07Rik	-0.340676	8.63426	2.61973e-08
Dmap1	-0.340529	10.339	1.1254e-05
Rad51	-0.340403	9.56737	2.03448e-09
2310022B05Rik	-0.34036	10.4049	0.000244911
E430026A01Rik	-0.340278	10.993	0.000683886
Prc1	-0.340085	12.436	1.55059e-05
BC088983	-0.340084	9.99994	2.29137e-05
Nfkb1	-0.339986	9.26828	2.26163e-07
Kpnb3	-0.339819	11.243	0.00110714
BC030867	-0.339576	8.57353	6.28213e-05
Gdf15	-0.33956	8.39395	2.98061e-07
Ndufc1	-0.339207	12.5256	1.45575e-06
Nfkbiz	-0.338946	8.82603	3.20925e-06
2810422J05Rik	-0.338938	8.88423	3.70061e-05
Ankrd28	-0.338842	9.31854	6.39975e-10
Polr2i	-0.338733	11.0811	2.25042e-06
Avpi1	-0.338561	10.1949	0.0031419
D030049N18Rik	-0.338379	8.76117	2.47622e-07
Mrpl13	-0.338373	11.2714	7.6178e-05
LOC732482	-0.338093	9.00365	6.04698e-07
B230363H02Rik	-0.338052	9.30642	8.74991e-05
Trim23	-0.337397	8.88471	0.000260727
Tufm	-0.337385	12.766	2.09771e-05
Poldip2	-0.337326	11.6983	2.6469e-05
Stk3	-0.33723	8.89014	1.88888e-08
C330001N20Rik	-0.337211	12.1976	7.00285e-05
E130309L16Rik	-0.337092	8.68377	2.25694e-05
Pcbp3	-0.337041	9.0182	5.34769e-06
D330026F23Rik	-0.336631	8.33358	1.27959e-06
Gna11	-0.336317	9.82328	0.000102859
C630002L24Rik	-0.33606	8.51203	4.10673e-06
Bach1	-0.335851	10.2031	0.00013872
Sdad1	-0.335717	9.9908	1.56718e-06
Nos3	-0.335603	8.23415	1.21182e-06
Nfx1	-0.335539	8.85817	4.62845e-07
Wipi1	-0.335402	8.86994	3.20621e-08
Tiam1	-0.334876	9.85786	0.00318723
Paf53	-0.334307	10.2611	0.000133123
LOC269355	-0.334294	11.5175	0.000177441
Scye1	-0.334228	12.1742	0.000133422
A630040A01Rik	-0.333838	9.00792	1.1587e-07
AI662250	-0.333586	9.80718	0.000323446
2410030J07Rik	-0.333555	8.6654	8.46216e-07
2410004H02Rik	-0.33353	8.98351	0.000610806
Eif3s10	-0.333524	10.4323	1.13622e-05
Tube1	-0.333371	8.77174	1.65592e-05
2410076I21Rik	-0.333335	8.64859	0.00890503
Dhcr7	-0.333326	8.61361	1.38791e-06
6430590I03Rik	-0.333206	8.25219	1.99775e-07
Pttg1ip	-0.333112	12.3014	0.0162942
Spata5l1	-0.333077	8.75673	3.21882e-06
E130104I10Rik	-0.332864	8.44945	3.52866e-07
Bbs4	-0.332781	9.84313	3.78995e-05
5730406O18Rik	-0.332749	9.27538	6.70538e-05
Bcl2l2	-0.332701	8.9979	3.71141e-09
AI527266	-0.332671	8.422	4.0475e-08
Nup85	-0.332379	11.8647	6.33147e-05
B230384C22Rik	-0.33201	8.75766	2.2695e-07
Xpnpep1	-0.331995	11.2178	7.34232e-06
Nsun5	-0.331923	9.11324	1.11136e-07
Nudc	-0.331914	13.6318	1.37182e-06
2610020H15Rik	-0.331707	8.64002	1.81765e-05
Pbef1	-0.331601	8.40789	5.0349e-06
2310069P03Rik	-0.331501	10.6501	0.000589022
scl0004059.1_11	-0.331484	10.8654	0.000821776
Ssbp1	-0.331196	9.60477	0.000126072
Mgea6	-0.331118	11.2273	1.42439e-05
Ube2d3	-0.331031	9.09605	3.34837e-05
Sf3b2	-0.330828	12.8413	3.9415e-05
Qtrtd1	-0.330648	8.8472	7.48873e-06
C330023D02Rik	-0.330503	8.3182	3.01565e-05
Ostf1	-0.330492	11.1394	0.0123914
Ppa1	-0.33047	14.0714	2.31319e-06
9430029K10Rik	-0.330087	11.1562	0.00173696
F830021D11Rik	-0.330029	8.80247	3.53648e-08
9130422H11Rik	-0.330022	9.09319	0.000257286
1110004B13Rik	-0.32999	8.93552	2.13759e-08
Apex1	-0.329697	11.515	1.67183e-06
Snrpa	-0.329473	11.995	1.32256e-06
Sipa1l2	-0.329225	8.75778	6.64031e-07
Uqcr	-0.329003	13.5055	1.96278e-05
Arv1	-0.328919	9.06108	6.23807e-06
E330035H20Rik	-0.32872	8.14879	3.17368e-07
Rapsn	-0.328651	8.23372	1.43016e-10
4930570C03Rik	-0.328581	9.26313	0.000681033
Chd2	-0.328443	9.57089	0.00824134
Cab39l	-0.328144	9.26141	2.47719e-05
6230415M23Rik	-0.327931	9.17268	5.96204e-06
C330006H24Rik	-0.327595	8.31091	4.45512e-10
5930403H17Rik	-0.32752	8.264	1.95061e-09
Arrb2	-0.327452	9.34316	7.99173e-06
Apoa1bp	-0.326806	10.084	9.0848e-06
Zfp330	-0.326625	11.7743	2.69861e-05
Uap1	-0.326559	10.1299	0.0399763
D230004N01Rik	-0.326509	9.96673	1.37393e-06
Slc16a6	-0.326471	8.50671	5.93143e-10
Ppp1r8	-0.326308	10.9919	9.68763e-05
2410016O06Rik	-0.326243	10.2504	1.26219e-06
E330029N23Rik	-0.326235	8.13693	6.82397e-07
Tmem14c	-0.326135	11.2785	9.60285e-07
D10Bur2e	-0.326086	8.37777	1.75508e-05
Nudt1	-0.326073	9.68905	0.00205148
Pgls	-0.325927	9.4594	0.00223386
LOC212815	-0.325648	8.61377	7.27423e-07
Psmd10	-0.325386	10.0656	1.23461e-06
2810046L04Rik	-0.325248	10.1787	2.19101e-07
9030612K14Rik	-0.325188	10.9827	1.75148e-05
Phgdh	-0.325145	10.5938	0.000188537
Tbn-pending	-0.324824	8.50896	3.01837e-06
2610205E22Rik	-0.324725	9.17275	6.84894e-06
2310066N05Rik	-0.324695	11.3174	5.21135e-06
2810031B20Rik	-0.324585	8.70232	3.8464e-05
Pdgfc	-0.324552	8.20697	5.30266e-06
Snrpf	-0.324529	12.4922	8.35951e-06
4930482J15Rik	-0.324388	8.68739	1.08969e-05
Gclm	-0.324262	11.2771	0.00345992
Ahsa1	-0.3241	10.5611	0.000233757
BC030477	-0.32394	8.32405	1.50374e-06
D030060M11Rik	-0.323423	10.0597	0.000448999
5830454E08Rik	-0.32317	8.21987	6.79994e-07
Gna13	-0.323033	10.5153	1.46705e-05
6720427H10Rik	-0.323014	8.59898	1.13232e-05
Nola3	-0.322838	11.7011	0.000803831
Smc1a	-0.322815	10.104	2.31014e-08
E130216C05Rik	-0.322726	8.64746	3.96647e-07
E430034L04Rik	-0.322493	12.8195	2.15868e-05
AU020772	-0.322359	9.1165	2.64198e-06
8430432M10Rik	-0.322316	9.03747	5.88173e-05
Acac	-0.322169	10.977	1.45623e-05
6820449I09Rik	-0.322114	10.4732	0.000176534
Ddx48	-0.322041	12.3176	0.000213384
2500002A22Rik	-0.322014	9.15175	4.20701e-05
Gna15	-0.321905	8.51362	5.18478e-06
0610038D11Rik	-0.321738	10.4962	1.42764e-07
Xab1	-0.321731	11.5379	8.09025e-05
Atf4	-0.321678	12.0224	0.00404371
Axin	-0.32158	9.72886	2.13995e-07
Taf5	-0.321094	9.0456	1.28421e-07
5730406M06Rik	-0.320996	10.9731	3.47623e-05
Ybx2	-0.320849	8.43204	2.04356e-06
AI553587	-0.320797	9.03723	6.20373e-06
Cdk5rap2	-0.320748	9.25696	6.81369e-07
Mto1	-0.320635	9.777	6.06454e-06
Rgs11	-0.320231	8.33233	5.50155e-05
LOC433224	-0.319885	10.331	0.000386168
2010013E08Rik	-0.319755	8.27693	3.44295e-07
6330503K22Rik	-0.319746	9.44815	8.56048e-05
Gpd2	-0.3197	10.5203	7.95801e-06
Atp5g2	-0.319687	11.7301	0.000188537
A930009M04Rik	-0.319673	10.5205	8.85596e-05
Rpa2	-0.319577	9.46609	1.11428e-05
A530050D06Rik	-0.319227	8.25902	2.42828e-05
Abcf2	-0.318948	11.5916	1.63703e-07
5330408N05Rik	-0.318928	8.51522	9.87349e-10
Hps1	-0.318445	8.88546	2.20001e-05
2810405K02Rik	-0.318369	8.66966	7.11088e-05
Mbc2	-0.318341	9.16052	2.97782e-09
Pde4d	-0.318018	8.27316	3.75471e-08
6030458P06Rik	-0.317825	9.88803	1.71585e-06
Slc4a7	-0.317252	10.6416	0.00870093
2810021B07Rik	-0.317235	9.32878	0.0011719
Dgkh	-0.317041	8.3904	1.92784e-08
AA175286	-0.316881	8.11735	0.00195417
Dock6	-0.316786	8.19546	1.28922e-08
C230075L19Rik	-0.316669	11.3227	0.000956151
Klf13	-0.316305	9.84834	9.52992e-05
0910001L09Rik	-0.316146	11.8742	0.00029138
EG624866	-0.315756	8.22377	2.32694e-08
Llgl1	-0.315616	11.5513	0.00162766
2410089K11Rik	-0.315513	8.35618	0.000322556
Fbxl6	-0.315364	10.2492	0.00305265
2810422O20Rik	-0.315183	8.81909	0.00465562
Hist1h4j	-0.314622	9.92674	0.0486354
2700032M20Rik	-0.314502	8.86737	2.04356e-06
2310008H09Rik	-0.314451	10.6195	0.000233441
Rfc5	-0.314404	10.1506	3.32986e-05
1100001A21Rik	-0.313786	9.23474	0.00385881
Rab33a	-0.313356	8.29414	1.46749e-06
Blvra	-0.313327	9.69151	4.0382e-05
Susd2	-0.313162	8.30761	7.05922e-05
6620401K05Rik	-0.3129	9.12003	7.72051e-06
1810021J13Rik	-0.312741	8.44643	5.72622e-06
2400007A17Rik	-0.312635	8.26717	1.16751e-05
LOC382237	-0.312471	8.1234	7.39144e-07
Dhrs4	-0.312388	8.90062	4.97983e-06
A830007L07Rik	-0.312145	8.21737	0.000129602
2310036D04Rik	-0.311923	8.3561	3.98416e-07
Tbcd	-0.311888	10.3194	2.93611e-08
AU016977	-0.311872	9.1426	8.61304e-05
Atp5j2	-0.311872	14.6748	0.000601715
LOC219145	-0.31184	12.2584	8.65545e-05
Zc3hdc5	-0.311114	9.30262	0.000200783
F730014I05Rik	-0.31097	8.74486	1.8264e-05
Mtf2	-0.310805	12.4801	9.64815e-07
Cox10	-0.310744	11.4981	0.000402502
Cox7c	-0.310577	14.6533	0.000149003
Sdf2l1	-0.310041	9.18962	4.49263e-06
1700034P14Rik	-0.309842	8.67093	5.57386e-06
scl0003078.1_29	-0.309841	8.49501	2.79311e-07
Iars	-0.309605	10.8721	7.32267e-06
Psmd7	-0.309544	11.4917	6.73827e-06
2700084L22Rik	-0.309524	8.37013	0.000630743
Tagln3	-0.309481	8.2233	3.44216e-07
LOC381529	-0.30923	8.71781	4.17531e-05
Hexdc	-0.308956	8.92357	0.00011353
Atp5s	-0.308921	9.71767	0.038203
Tbc1d1	-0.308854	8.84863	3.1497e-08
Prune	-0.308525	9.34599	0.000171127
D030051D21	-0.308389	9.35403	1.58107e-06
scl000063.1_0_REVCOMP	-0.308213	9.59758	0.0283122
1110054N06Rik	-0.308113	8.57212	5.07911e-05
LOC384710	-0.307979	10.2351	0.00174424
scl0002064.1_2	-0.307923	9.39783	0.000389767
A630055I06Rik	-0.307484	8.61146	1.82903e-06
A630082N15Rik	-0.30738	8.7946	0.000169416
Dp1l1	-0.307312	9.16482	0.00777046
Mrps27	-0.307232	9.53924	3.48009e-05
Sipa1l1	-0.307105	10.8947	0.0010351
Muted	-0.307084	9.13259	1.87278e-09
Pdcd7	-0.307068	10.2576	6.49542e-05
Hs1bp3	-0.307001	8.64391	3.99842e-07
LOC241621	-0.306787	13.2766	6.26443e-05
Acly	-0.306701	13.6875	0.00221022
Timm10	-0.306616	11.3803	1.59891e-06
Peci	-0.306534	8.97147	6.77072e-05
4833441B18Rik	-0.305755	8.37748	5.72686e-05
Prss15	-0.305693	10.3103	1.54835e-05
4921521J11Rik	-0.305491	9.94736	3.72598e-05
Gm867	-0.305312	8.17539	2.20927e-06
BC004701	-0.304839	8.38603	2.40951e-06
Nbr1	-0.304729	8.82777	1.47789e-07
Ubl7	-0.304694	10.8365	0.000103401
Rutbc3	-0.304576	8.86473	3.50301e-05
Fgf10	-0.304275	8.06332	2.05101e-10
Usp39	-0.304254	11.0107	1.47071e-06
Fbl	-0.303705	13.2469	7.54498e-07
[truncated: 5,849 more rows]
