# Supplementary material for: An efficient method for generation of bi-allelic null mutant mouse embryonic stem cells and its application for investigating epigenetic modifiers
Source: Nucleic Acids Res. 2017 Sep 13;45(21):e174. doi: 10.1093/nar/gkx811 (PMC5716182; doi:10.1093/nar/gkx811)
Supplement: Supplementary Data [file gkx811_supp.zip › nar-00912-met-g-2017-File011.xls]

## Sheet: Sheet1
Supplementary Table S8.
Details of antibodies used and H3K9me3 ChIP-Seq profiles generated. All antibodies used are polyclonal.
Profile	Company	Catalogue	lot	Amount per ChIP (micrograms)	Unique Mapped Tags (0/1mm)	Tags after normalisation
T=0	Gift from Thomas Jenuwein/Millipore (Upstate)	07-442	4861	6	8308989	6887819
T=2d	Gift from Thomas Jenuwein/Millipore (Upstate)	07-442	4861	6	6887819	6887819
T=4d	Gift from Thomas Jenuwein/Millipore (Upstate)	07-442	4861	6	7508367	6887819
T=6d	Gift from Thomas Jenuwein/Millipore (Upstate)	07-442	4861	6	8997972	6887819
T=0	Abcam	Ab8898	58206	3	9027532	8503927
T=6d	Abcam	Ab8898	58206	3	8503927	8503927
T=0	Abcam	Ab8898	638466	3	12223905	12194174
T=6d	Abcam	Ab8898	638466	3	12194174	12194174
